# Supplementary material for: The transcription factors TFE3 and TFEB amplify p53 dependent transcriptional programs in response to DNA damage
Source: eLife journal article supplement (doi:10.7554/elife.40856), 2018-12-06
Supplement: supp [file elife-40856-supp-v1.zip]

Archive with 32 entries (32 files):
- elife_poa_e40856_Figure_2_source_data_3.xlsx
- elife_poa_e40856_Figure_6_source_data_2.xlsx
- elife_poa_e40856_Figure_1_figure_supplement_1.pdf
- elife_poa_e40856_Figure_1_source_data_1.xlsx
- elife_poa_e40856_Figure_9_source_data_3.xlsx
- elife_poa_e40856_Figure_2_figure_supplement_1_source_data_1.xlsx
- elife_poa_e40856_Figure_6_source_data_1.xlsx
- elife_poa_e40856_Supplementary_File_4.xlsx
- elife_poa_e40856_Figure_5_figure_supplement_1.pdf
- elife_poa_e40856_Supplementary_File_3.xlsx
- elife_poa_e40856_Figure_7_source_data_1.xlsx
- elife_poa_e40856_Transparent_Reporting_File.pdf
- elife_poa_e40856_Figure_2_source_data_1.xlsx
- elife_poa_e40856_Figure_3_figure_supplement_1_source_data_1.xlsx
- elife_poa_e40856_Figure_4_source_data_3.xlsx
- elife_poa_e40856_Figure_4_source_data_4.xlsx
- elife_poa_e40856_Figure_8_figure_supplement_1.pdf
- elife_poa_e40856_Figure_3_source_data_1.xlsx
- elife_poa_e40856_Figure_3_figure_supplement_1.pdf
- elife_poa_e40856_Figure_2_source_data_4.xlsx
- elife_poa_e40856_Supplementary_File_1.csv
- elife_poa_e40856_Figure_2_source_data_2.xlsx
- elife_poa_e40856_Supplementary_File_2.csv
- elife_poa_e40856_Figure_5_source_data_2.xlsx
- elife_poa_e40856_Figure_5_figure_supplement_1_source_data_1.xlsx
- elife_poa_e40856_Figure_7_source_data_2.xlsx
- elife_poa_e40856_Figure_2_figure_supplement_1.pdf
- elife_poa_e40856_Figure_9_source_data_2.xlsx
- elife_poa_e40856_Figure_4_source_data_2.xlsx
- elife_poa_e40856_Figure_5_source_data_1.xlsx
- elife_poa_e40856_Figure_9_source_data_1.xlsx
- elife_poa_e40856_Figure_4_source_data_1.xlsx
