# Supplementary material for: The transcription factors TFE3 and TFEB amplify p53 dependent transcriptional programs in response to DNA damage
Source: eLife journal article supplement (doi:10.7554/elife.40856), 2018-12-06
Supplement: supp [file elife-40856-supp-v1.zip › elife_poa_e40856_Figure_1_source_data_1.xlsx]

## Sheet: Source data for Figure1B
Source data for Figure 1B : TFE3 Localization with Etop treatment
	0			4			8			16
	Nuclear	Intermediate	Cytoplasmic	Nuclear	Intermediate	Cytoplasmic	Nuclear	Intermediate	Cytoplasmic	Nuclear	Intermediate	Cytoplasmic
Experiment 1	4	116	132	20	153	144	94	161	51	203	118	18
percent total	0.015873	0.460317	0.52381	0.0630915	0.48265	0.454259	0.30719	0.526144	0.166667	0.59882	0.348083	0.0530973
percent total	1.5873	46.0317	52.381	6.30915	48.265	45.4259	30.719	52.6144	16.6667	59.882	34.8083	5.30973
	0			4			8			16
	Nuclear	Intermediate	Cytoplasmic	Nuclear	Intermediate	Cytoplasmic	Nuclear	Intermediate	Cytoplasmic	Nuclear	Intermediate	Cytoplasmic
Experiment 2	1	53	166	40	73	109	109	65	71	167	63	24
percent total	0.00454545	0.240909	0.754545	0.18018	0.328829	0.490991	0.444898	0.265306	0.289796	0.65748	0.248031	0.0944882
percent total	0.454545	24.0909	75.4545	18.018	32.8829	49.0991	44.4898	26.5306	28.9796	65.748	24.8031	9.44882
	0			4			8			16
	Nuclear	Intermediate	Cytoplasmic	Nuclear	Intermediate	Cytoplasmic	Nuclear	Intermediate	Cytoplasmic	Nuclear	Intermediate	Cytoplasmic
Experiment 3	0	25	241	27	54	212	83	59	108	190	55	24
percent total	0	0.093985	0.906015	0.0921502	0.1843	0.723549	0.332	0.236	0.432	0.70632	0.204461	0.0892193
percent total	0	9.3985	90.6015	9.21502	18.43	72.3549	33.2	23.6	43.2	70.632	20.4461	8.92193
Mean	0.680616	26.5071	72.8123	11.1807	33.1926	55.6266	36.1363	34.2483	29.6154	65.4207	26.6858	7.8935
Stdev	0.471951	10.6439	11.1121	3.52006	8.614	8.4311	4.23773	9.22191	7.66611	3.10756	4.25152	1.3008
p-value				0.113525			0.00280122			7.32565e-05
