# Supplementary material for: The transcription factors TFE3 and TFEB amplify p53 dependent transcriptional programs in response to DNA damage
Source: eLife journal article supplement (doi:10.7554/elife.40856), 2018-12-06
Supplement: supp [file elife-40856-supp-v1.zip › elife_poa_e40856_Figure_2_figure_supplement_1_source_data_1.xlsx]

## Sheet: Source data for Figure 2 suppl 
Source data for Figure 2 supplement : qPCR data for lysosomal-autophagy genes
		WT Untreated	WT 4h EBSS	p53-/- Untreated	p53-/- 4h EBSS
	Experiment 1	1	2.56369	1	2.08814
	Experiment 2	1	2.804	1	2.04721
Lamp1	Experiment 3	1	2.9365	1	2.18238
	Mean	1	2.7637	1	2.10515
	Stdev	0	0.188989	0	0.0693141
	p-value				0.00468943
	Experiment 1	1	5.127	1	3.74282
	Experiment 2	1	4.99591	1	2.24176
Mcoln1	Experiment 3	1	5.38132	1	2.67674
	Mean	1	5.16562	1	2.8214
	Stdev	0	0.19596	0	0.772324
	p-value				0.00771549
	Experiment 1	1	4.44344	1	2.60466
	Experiment 2	1	4.58574	1	2.35165
Atp6v1c1	Experiment 3	1	4.82074	1	2.28853
	Mean	1	4.61403	1	2.41116
	Stdev	0	0.190538	0	0.167298
	p-value				0.000113899
	Experiment 1	1	2.53433	1	2.25293
	Experiment 2	1	2.5978	1	1.95087
Ctsd	Experiment 3	1	2.39889	1	1.85771
	Mean	1	2.50896	1	2.01365
	Stdev	0	0.101599	0	0.206609
	p-value				0.0211115
	Experiment 1	1	3.64948	1	5.61951
	Experiment 2	1	4.518	1	4.23932
Uvrag	Experiment 3	1	3.62453	1	4.11982
	Mean	1	3.9097	1	4.61273
	Stdev	0	0.508794	0	0.833495
	p-value				0.265694
