# Supplementary material for: The transcription factors TFE3 and TFEB amplify p53 dependent transcriptional programs in response to DNA damage
Source: eLife journal article supplement (doi:10.7554/elife.40856), 2018-12-06
Supplement: supp [file elife-40856-supp-v1.zip › elife_poa_e40856_Figure_2_source_data_1.xlsx]

## Sheet: Source data for Figure 2B
Source data for Figure 2B : phosphorylation of S6K and 4EBP1 in WT and p53-/- MEFs
		MEF WT			MEF p53-/-
	Etop 100uM time (h)	0	4	8	0	4	8
	phos-p70	12446.5	16616.5	11949.2	20232.8	21784.7	18181.1
	total p70	19619.6	20887.5	20629.3	21001.8	22477.7	22610.1
	phos-4EBp1	24920.8	17956.2	13162.5	19574.1	16772.8	17031.8
Experiment 1	Total 4EBP1	21658.3	15758.2	13926	12595.4	10491.8	10883.1
	p/total S6K	0.634391	0.795524	0.579233	0.963384	0.969169	0.804114
	p/total 4EBP1	1.15064	1.13948	0.945177	1.55407	1.59866	1.56497
	S6K activation	1	1.254	0.913054	1.5186	1.52772	1.26754
	4EBP1 Activation	1	0.990306	0.821438	1.35062	1.38937	1.36009
		MEF WT			MEF p53-/-
	Etop 100uM time (h)	0	4	8	0	4	8
	phos-p70	14073.9	9476.57	6925.98	20788	21180.9	25444.1
	total p70	16813.7	15632.7	12713	20285.1	22003	23490.4
	phos-4EBp1	17641.2	9372.64	7629.28	22479.2	14497.7	16290.5
Experiment 2	Total 4EBP1	12040.1	15006.4	12871.8	12263.1	13183.5	17869.9
	p/total S6K	0.837052	0.606202	0.544796	1.02479	0.962636	1.08317
	p/total 4EBP1	1.4652	0.624575	0.592712	1.83308	1.09968	0.911613
	S6K activation	1	0.724211	0.650851	1.22429	1.15003	1.29403
	4EBP1 Activation	1	0.426273	0.404526	1.25108	0.750534	0.622177
		MEF WT			MEF p53-/-
	Etop 100uM time (h)	0	4	8	0	4	8
	phos-p70	16798.8	8770.4	4062.15	20410.2	21418.4	23083.1
	total p70	17708.3	21667.5	20365.1	22421.7	19156.1	18330.9
	phos-4EBp1	19501.7	14363.2	8611.64	22340.9	22243.2	18949.6
Experiment 3	Total 4EBP1	29156.1	26581.6	27023.6	26212.6	24346.7	22247.7
	p/total S6K	0.948635	0.404772	0.199466	0.910289	1.1181	1.25925
	p/total 4EBP1	0.668872	0.540345	0.318671	0.852296	0.913604	0.851756
	S6K activation	1	0.426688	0.210267	0.959578	1.17864	1.32743
	4EBP1 Activation	1	0.807846	0.476431	1.27423	1.36589	1.27342
		MEF WT			MEF p53-/-
	Etop 100uM time (h)	0	4	8	0	4	8
	phos-p70	23662	10877	8698.93	21383.1	22381.1	15278.9
	total p70	26856.8	20433.1	22013.1	24859.1	23711.6	23370.3
	phos-4EBp1	29814.4	8486.4	6051.59	19223.2	11411	11286.5
Experiment 4	Total 4EBP1	28295.2	21327	21273.1	22668.5	17728.6	21313.1
	p/total S6K	0.881045	0.532322	0.395171	0.860172	0.943888	0.653774
	p/total 4EBP1	1.05369	0.397918	0.284472	0.848014	0.643649	0.529557
	S6K activation	1	0.604194	0.448525	0.976309	1.07133	0.742045
	4EBP1 Activation	1	0.59491	0.425301	1.26783	0.962291	0.791716
		MEF WT			MEF p53-/-
	Etop 100uM time (h)	0	4	8	0	4	8
	phos-p70	17976.1	8898.1	5440.28	22866.5	25403.5	20485.5
	total p70	28013.4	21625.7	17322.9	17474.2	17956.7	16320.8
	phos-4EBp1	16568.4	9512.74	6360.86	17454.7	18942.8	14644.4
	Total 4EBP1	13500.8	12177.5	8928.23	13432.5	15795.4	15406.5
Experiment 5
	p/total S6K	0.641697	0.41146	0.314051	1.30859	1.41471	1.25518
	p/total 4EBP1	1.22721	0.781176	0.712444	1.29944	1.19926	0.950534
	S6K activation	1	0.467014	0.356452	1.48527	1.60572	1.42465
	4EBP1 Activation	1	0.636545	0.580539	1.05885	0.977227	0.774548
	Mean p/total S6K	0.788564	0.550056	0.406543	1.01345	1.0817	1.0111
	Mean p/total 4EBP1	1.11312	0.696699	0.570695	1.27738	1.09097	0.961686
	Mean S6K activation	1	0.697541	0.515549	1.28518	1.37173	1.2822
	Stdev S6K activation	0	0.333746	0.27355	0.267363	0.242179	0.268891
	Mean 4EBP1 Activation	1	0.625897	0.512698	1.14756	0.9801	0.863954
	Stdev 4EBP1 Activation	0	0.215358	0.170578	0.108533	0.278386	0.329791
	Significance p-value S6K					0.0106066	0.00366738
	Significance p-value 4EBP1					0.0353752	0.0343922
