# Supplementary material for: The transcription factors TFE3 and TFEB amplify p53 dependent transcriptional programs in response to DNA damage
Source: eLife journal article supplement (doi:10.7554/elife.40856), 2018-12-06
Supplement: supp [file elife-40856-supp-v1.zip › elife_poa_e40856_Figure_2_source_data_2.xlsx]

## Sheet: Source data for Figure 2D
Source data for Figure 2D : TFE3 localization in WT and p53-/- MEF
		WT									p53-/-
		0h Etop			8h Etop			2hr EBSS			0h Etop			8h Etop			2hr EBSS
		Nuclear	Intermediate	Cytoplasmic	Nuclear	Intermediate	Cytoplasmic	Nuclear	Intermediate	Cytoplasmic	Nuclear	Intermediate	Cytoplasmic	Nuclear	Intermediate	Cytoplasmic	Nuclear	Intermediate	Cytoplasmic
Experiment 1		4	47	217	82	63	39	148	69	16	0	79	234	16	50	110	57	96	92
	percent total	1.49254	17.5373	80.9701	44.5652	34.2391	21.1957	63.5193	29.6137	6.86695	0	25.2396	74.7604	9.09091	28.4091	62.5	23.2653	39.1837	37.551
Experiment 2		0	20	102	28	28	27	72	44	5	0	28	107	34	18	62	58	36	30
	percent total	0	16.3934	83.6066	33.7349	33.7349	32.5301	59.5041	36.3636	4.13223	0	20.7407	79.2593	29.8246	15.7895	54.386	46.7742	29.0323	24.1935
Experiment 3		0	50	169	80	92	41	158	55	4	0	34	310	25	67	182	19	111	198
	percent total	0	22.8311	77.1689	37.5587	43.1925	19.2488	72.8111	25.3456	1.84332	0	9.88372	90.1163	9.12409	24.4526	66.4234	5.79268	33.8415	60.3659
	Mean	0.497512	18.9206	80.5819	38.6196	37.0555	24.3249	65.2782	30.441	4.28083	0	18.6214	81.3786	16.0132	22.8837	61.1031	25.2774	34.0191	40.7035
	Stdev	0.861717	3.4345	3.23632	5.49253	5.32075	7.17232	6.8256	5.5554	2.51511	0	7.89428	7.89428	11.961	6.45443	6.13907	20.5647	5.07804	18.291
	p-value	0.373901		0.879346	0.040944	0.0426232	0.00251498	0.0329788	0.456529	0.0268577
