# Supplementary material for: The transcription factors TFE3 and TFEB amplify p53 dependent transcriptional programs in response to DNA damage
Source: eLife journal article supplement (doi:10.7554/elife.40856), 2018-12-06
Supplement: supp [file elife-40856-supp-v1.zip › elife_poa_e40856_Figure_2_source_data_3.xlsx]

## Sheet: Source data for Figure 2F
Source data for Figure 2F : TFEB localization in WT and p53-/- MEF
		cytosol	intermediate	nuclear
	WT 0h	12	10	1
		23	12	0
		16	7	1
		22	18	2
	percent	59.234	37.4469	3.3191
	p53-/- 0h	18	7	1
		20	6	2
		24	10	0
Experiment 1		19	11	2
	percent	67.6556	28.0346	4.30975
	WT 8h	5	27	7
		6	28	8
		9	19	18
		10	21	9
	percent	17.9179	57.4254	24.6567
	p53 -/- 8h	12	18	3
		16	14	4
		10	19	4
		16	15	5
	percent	39.5425	48.7411	11.7164
		cytosol	intermediate	nuclear
	WT 0h	30	13	2
		21	12	1
		26	12	0
		27	15	2
	percent	64.554	32.4632	2.98277				cytosol	intermediate	nuclear
	p53-/- 0h	38	12	1		WT 0h	Stdev	3.52969	2.84143	2.11952
		25	8	2			Stdev error	1.76484	1.42071	1.05976
		30	10	1		p53-/- 0h	Stdev	5.15323	4.55167	1.73814
Experiment 2		29	15	2			Stdev error	2.57662	2.27584	0.86907
	percent	70.5381	25.8464	3.61548		WT 8h	Stdev	4.35772	7.797	3.96458
	WT 8h	8	32	9			Stdev error	2.17886	3.8985	1.98229
		11	28	9		p53 -/- 8h	Stdev	7.4717	7.2785	3.58129
		15	26	15			Stdev error	3.73585	3.63925	1.79064
		10	27	11			p-value	0.00609985	0.105851	0.027336
	percent	21.7156	56.5795	21.7049
	p53 -/- 8h	14	25	5
		21	19	6
		18	24	10
		19	17	5
	percent	39.6068	46.4349	13.9583
