# Supplementary material for: The transcription factors TFE3 and TFEB amplify p53 dependent transcriptional programs in response to DNA damage
Source: eLife journal article supplement (doi:10.7554/elife.40856), 2018-12-06
Supplement: supp [file elife-40856-supp-v1.zip › elife_poa_e40856_Figure_2_source_data_4.xlsx]

## Sheet: Source data for Figure 2H
Source data for Figure 2H : TFE3 localization in nucleus with active Rags transfection
			Nucleus	Cytosol	Total	% cells with TFE3 in nucleus
	Mock	DMSO	9	296	305	2.95082
Experiment 1		Etoposide	156	165	321	48.5981
	Active Rags	DMSO	0	454	454	0
		Etoposide	7	475	482	1.45
	Mock	DMSO	12	311	323	3.71517
Experiment 2		Etoposide	129	168	297	43.4343
	Active Rags	DMSO	0	309	309	0
		Etoposide	5	400	405	1.23457
	DMSO (Mock)	Etoposide (Mock)	DMSO (Active Rags)	Etoposide (Active Rags)
Mean	3.335	46.02	0.27	1.34
Stdev	0.5445	3.656	0.07071	0.1556
Stdev error	0.385	2.585	0.05	0.11
p-value		p <0.0001		p <0.0001
