# Supplementary material for: The transcription factors TFE3 and TFEB amplify p53 dependent transcriptional programs in response to DNA damage
Source: eLife journal article supplement (doi:10.7554/elife.40856), 2018-12-06
Supplement: supp [file elife-40856-supp-v1.zip › elife_poa_e40856_Figure_3_figure_supplement_1_source_data_1.xlsx]

## Sheet: Source data for Figure 3 suppl
Source data for Figure 3 supplement : qPCR analysis of differentially expressed p53 upstream regulators and downstream effectors
		Experiment 1	Experiment 2	Experiment 3	Mean	Stdev	p-value
	wt 0	1.03891	1.01003	0.9988	1.01591	0.0206888
Wrap53	wt 8	1.89473	1.80623	1.88744	1.8628	0.0491275
	dko 0	1.06815	1.09356	1.04275	1.06815	0.0254026	0.050752
	dko 8	1.22032	1.33866	1.18043	1.24647	0.0822899	0.000369699
	wt 0	1.00209	1.01277	1.02934	1.01473	0.0137344
Sesn1	wt 8	2.4974	2.35704	2.98577	2.6134	0.330029
	dko 0	1.09212	1.04895	1.04326	1.06144	0.0267157	0.0544733
	dko 8	1.14888	1.3963	1.34533	1.29683	0.130646	0.00301791
	wt 0	1.07252	1.36368	0.868012	1.1014	0.249096
Trp53inp1	wt 8	498.827	554.402	438.889	497.373	57.7704
	dko 0	5.32012	3.68708	2.22082	3.74267	1.5504	0.043531
	dko 8	280.453	348.785	227.257	285.498	60.9208	0.0119584
	wt 0	1.01536	1.05433	0.987347	1.01901	0.0336422
mdm2	wt 8	8.29361	8.02979	9.07464	8.46601	0.543346
	dko 0	0.595221	0.782723	0.593787	0.657244	0.108671	0.00529968
	dko 8	6.02151	7.34432	7.28696	6.88426	0.74772	0.0413863
	wt 0	0.949149	1.06463	1.06463	1.02614	0.066676
sesn2	wt 8	22.5637	25.7407	25.7407	24.6817	1.83423
	dko 0	4.90021	6.66585	6.66585	6.0773	1.01939	0.00102078
	dko 8	15.8946	19.6879	19.6879	18.4235	2.19009	0.0191961
	wt 0	1.00056	1.07008	1.03829	1.03631	0.0348027
Foxo3	wt 8	2.81406	3.12176	3.41394	3.11659	0.299972
	dko 0	1.19284	1.5354	1.25833	1.32886	0.181848	0.0520803
	dko 8	2.11846	2.48962	2.62501	2.41103	0.262259	0.0374011
	wt 0	1	1	1	1	0
Chek2	wt 8	2.19371	2.28504	2.42627	2.29969	0.117168
	dko 0	0.991298	1.20404	1.4115	1.1899	0.210107	0.170734
	dko 8	1.14993	1.55046	1.9877	1.52462	0.419018	0.0423143
	wt 0	1	1	1	1	0
Bbc3	wt 8	27.6492	25.1528	21.7218	24.7204	2.97597
	dko 0	1.95087	0.857166	0.970338	1.1898963847021.17509283524	0.601448	0.496479
	dko 8	15.3576	13.7631	16.6478	15.2101	1.44502	0.00739411
	wt 0	1	1	1	1	0
Rad9a	wt 8	1.51737	1.16452	1.12486	1.25732	0.216077
	dko 0	1.10241	1.01263	1.07516	1.06273	0.0460295	0.0755293
	dko 8	0.482804	0.638454	0.750526	0.613887	0.134451	0.011785
