# Supplementary material for: The transcription factors TFE3 and TFEB amplify p53 dependent transcriptional programs in response to DNA damage
Source: eLife journal article supplement (doi:10.7554/elife.40856), 2018-12-06
Supplement: supp [file elife-40856-supp-v1.zip › elife_poa_e40856_Figure_3_source_data_1.xlsx]

## Sheet: Source data for Figure 3
Source data for Figure 3 : RNA-Seq identifies differentially regulated genes in WT versus TFEB/TFE3 DKO MEF
MEF WT Untreated	Sesn1	Sesn2	Wrap53	Egfr	Ctsd	TP53	Mdm2	Bax	Rad9a	Laptm5	Chek2	Trp53inp1	Bbc3	Dram1	Cdkn1a	Foxo3
Experiment 1	1	1	1	1	1	1	1	1	1	1	1	1	1	1	1	1
Experiment 2	1	1	1	1	1	1	1	1	1	1	1	1	1	1	1	1
Experiment 3	1	1	1	1	1	1	1	1	1	1	1	1	1	1	1	1
Experiment 4												1	1	1	1	1
Experiment 5												1	1	1	1	1
MEF WT Etop	Sesn1	Sesn2	Wrap53	Egfr	Ctsd	TP53	Mdm2	Bax	Rad9a	Laptm5	Chek2	Trp53inp1	Bbc3	Dram1	Cdkn1a	Foxo3
Experiment 1	4.72541	5.5522	2.92302	1.50006	2.85362	1.78351	58.6109	3.07697	1.88519	4.41753	2.47913	54.4252	11.6171	2.68887	35.4004	1.90799
Experiment 2	4.09717	6.22162	2.70352	1.70357	2.44849	1.71749	46.7313	2.72983	1.75318	5.14822	2.50984	38.4014	18.7878	3.17084	27.5005	1.47944
Experiment 3	4.30776	4.98138	3.1142	1.58053	2.67303	1.96454	52.8608	2.80788	2.03118	4.56648	2.14055	38.2463	13.1386	3.00947	44.1402	1.78514
Experiment 4												33.7567	13.6663	3.22914	38.2781	1.742
Experiment 5												31.2122	18.1811	2.96194	47.5353	1.37355
Mean	4.3691	5.56211	2.90873	1.59254	2.65317	1.81891	52.5098	2.86778	1.88644	4.70045	2.37041	39.2453	16.174	3.28486	37.8992	1.60128
StdEv	0.319755	0.620775	0.205503	0.102494	0.202963	0.127905	5.9408	0.18212	0.139055	0.386115	0.204919	8.53907	3.76326	0.826718	7.81138	0.225655
MEF DKO Untreated	Sesn1	Sesn2	Wrap53	Egfr	Ctsd	TP53	Mdm2	Bax	Rad9a	Laptm5	Chek2	Trp53inp1	Bbc3	Dram1	Cdkn1a	Foxo3
Experiment 1	0.260674	0.939124	0.668761	0.3521	1.03148	0.87329	0.607245	1.01331	0.813476	0.434986	1.38345	0.60339	1.0763	0.200678	1.05547	1.03212
Experiment 2	0.138551	1.08115	0.618361	0.375961	0.691077	0.788453	0.540362	0.84228	0.859703	0.791574	1.12323	0.518385	0.904495	0.149419	0.258058	0.618889
Experiment 3	0.45512	0.529321	0.692209	0.335733	1.36011	0.783992	0.658592	0.898842	0.786286	0.710614	1.1981	0.698217	0.880278	0.138533	0.593594	1.09073
Experiment 4												0.622615	0.732173	0.181561	0.727945	0.811766
Experiment 5												0.529768	0.89923	0.10458	0.476217	0.798534
Mean	0.25426	0.813034	0.659048	0.354216	0.989738	0.814233	0.600097	0.915435	0.819265	0.625461	1.2302	0.698839	0.903835	0.168435	0.561967	0.873644
StdEv	0.159655	0.286537	0.0377345	0.02023	0.334536	0.0503175	0.0592849	0.0871333	0.0371174	0.18694	0.133964	0.31003	0.176823	0.0445336	0.297334	0.177431
p-value	0.00148684	0.415452	9.81811e-05	6.42126e-07	0.89345	0.00313332	0.000312839	0.179036	0.00109528	0.081611	0.0934442	0.0468089	0.282563	3.34944e-15	0.0217858	0.341405
MEF DKO Etop	Sesn1	Sesn2	Wrap53	Egfr	Ctsd	TP53	Mdm2	Bax	Rad9a	Laptm5	Chek2	Trp53inp1	Bbc3	Dram1	Cdkn1a	Foxo3
Experiment 1	1.03538	2.40076	1.271	0.463689	1.7618	1.02164	12.2114	1.82229	0.815871	0.948317	1.54592	17.8594	9.28255	0.767778	34.8599	1.2697
Experiment 2	0.369772	1.34798	0.83416	0.315544	0.897753	0.819746	4.55444	0.869914	0.798139	1.28682	0.865036	16.6639	13.9768	0.765654	20.7539	0.673366
Experiment 3	1.32881	3.52856	1.47684	0.620318	2.09425	1.10028	13.372	1.75095	0.917413	1.3295	1.39889	11.7915	5.64919	0.548376	18.7168	1.1551
Experiment 4												13.6002	9.00778	0.681815	22.6146	1.24431
Experiment 5												14.548	9.24374	0.597182	31.0006	1.01315
Mean	0.798298	2.25187	1.16121	0.449401	1.49067	0.973109	9.06007	1.40536	0.842213	1.17504	1.23216	16.0631	10.1981	0.750725	24.859	1.0457
StdEv	0.491406	1.09051	0.328186	0.152406	0.617618	0.144712	4.79105	0.530459	0.0643578	0.208847	0.358286	4.52712	3.63299	0.187109	6.97653	0.218365
p-value	0.000513043	0.0120541	0.00153682	0.000441886	0.0458929	0.00165328	0.000635309	0.0127034	0.00029283	0.000155388	0.00970806	3.31036e-05	0.0122716	3.43723e-06	0.0242355	0.00827687
