# Supplementary material for: The transcription factors TFE3 and TFEB amplify p53 dependent transcriptional programs in response to DNA damage
Source: eLife journal article supplement (doi:10.7554/elife.40856), 2018-12-06
Supplement: supp [file elife-40856-supp-v1.zip › elife_poa_e40856_Figure_4_source_data_1.xlsx]

## Sheet: Source data for Figure 4B
Source data for Figure 4B : Quantification of p53 induction in WT and DKO Raw264.7 cells
RAW264.7 WT	Time Etop (h)	0	0.5	1	2	4	8
nomalized p53	Experiment 1	0.0777516	0.162884	0.49194	1	1.35612	2.36026
	Experiment 2	0.196807	0.316071	0.555868	1	1.60052	1.68589
	Experiment 3	0.104606	0.317446	0.652149	1	1.09567	1.016
	Mean	0.126388	0.265467	0.566652	1	1.35077	1.68738
	StdeV	0.0624452	0.0888422	0.0806471	0	0.252465	0.672134
RAW264.7 DKO	Time Etop (h)	0	0.5	1	2	4	8
nomalized p53	Experiment 1	0.0542976	0.140143	0.855129	1	0.642029	0.552592
	Experiment 2	0.230963	0.32359	0.748432	1	0.557893	0.410967
	Experiment 3	0.071216	0.315873	0.684767	1	0.644414	0.0785435
	Mean	0.118825	0.259869	0.762776	1	0.614779	0.347367
	Stdev	0.0974814	0.103757	0.086082	0	0.049279	0.24334
	p-value					p<0.01	p<0.0001
