# Supplementary material for: The transcription factors TFE3 and TFEB amplify p53 dependent transcriptional programs in response to DNA damage
Source: eLife journal article supplement (doi:10.7554/elife.40856), 2018-12-06
Supplement: supp [file elife-40856-supp-v1.zip › elife_poa_e40856_Figure_4_source_data_2.xlsx]

## Sheet: Source data for Figure 4C
Source data for Figure 4C : Quantification of Mdm2 levels in WT and DKO Raw264.7 cells
		Time Etop (h)	2	4	8
	RAW264.7 WT	Mdm2	0.315453	0.520975	0.560988
Experiment 1		normalized Mdm2	1	1	1
	RAW264.7 DKO	Mdm2	1.10839	1.01068	1.2754
		normalized Mdm2	3.51365	3.51365	3.51365
	RAW264.7 WT	Mdm2	0.330301	0.633976	0.494732
Experiment 2		normalized Mdm2	1	1	1
	RAW264.7 DKO	Mdm2	1.36366	1.85335	0.564439
		normalized Mdm2	4.12855	2.92338	1.1409
	RAW264.7 WT	Mdm2	0.364585	0.765086	0.689316
Experiment 3		normalized Mdm2	1	1	1
	RAW264.7 DKO	Mdm2	1.58646	1.56876	0.0956395
		normalized Mdm2	4.35142	2.05044	0.138745
WT	Mdm2 2h	Mdm2 4h	Mdm2 8h
Experiment 1	1	1	1
Experiment 2	1	1	1
Experiment 3	1	1	1
Mean	1	1	1
Stdev	0	0	0
DKO	Mdm2 2h	Mdm2 4h	Mdm2 8h
Experiment 1	3.51365	3.51365	3.51365
Experiment 2	4.12855	2.92338	1.1409
Experiment 3	4.35142	2.05044	0.138745
Mean	3.99787	2.82916	1.59776
Stdev	0.433903	0.736142	1.73322
p-value	0.000279431	0.0126079	0.582437
