# Supplementary material for: The transcription factors TFE3 and TFEB amplify p53 dependent transcriptional programs in response to DNA damage
Source: eLife journal article supplement (doi:10.7554/elife.40856), 2018-12-06
Supplement: supp [file elife-40856-supp-v1.zip › elife_poa_e40856_Figure_4_source_data_3.xlsx]

## Sheet: Source data for Figure 4E
Source data for Figure 4E : Quantification of p53 levels with chx treated WT and DKO Raw264.7 cells
		p53	gapdh	relative p53
	Null 0	13157	7628.03	1
	Null 2	10370.4	6668.01	0.901685
	Null 4	13650	11735.7	0.674339
	Null 6	6755.96	6156.67	0.636203
Experiment 1	Null 8	2437.01	6163.96	0.22922
	DKO 0	11217.4	7448.48	1
	DKO 2	9405.6	6640.06	0.940564
	DKO 4	5785.18	7289.89	0.526951
	DKO 6	1471.13	3732.28	0.26173
	DKO 8	177.778	2716.48	0.0434557
		p53	gapdh	relative p53
	Null 0	14928.4	13594	1
	Null 2	10848.1	11445.8	0.86306
	Null 4	10883.8	12677.8	0.781755
	Null 6	8548.84	12753	0.610419
Experiment 2	Null 8	4277.13	11966.8	0.325468
	DKO 0	12733.8	9303.77	1
	DKO 2	10116	8634.31	0.856017
	DKO 4	5971.43	12365.8	0.352821
	DKO 6	2258.6	15564.3	0.106026
	DKO 8	140.551	10619.7	0.00966991
		p53	gapdh	relative p53		Mean	Stdev	Stdev error	p-value
	Null 0	14594.6	16815	1		1	0	0
	Null 2	13989.4	14146.2	1.13936		0.968037	0.149626	0.0863866
	Null 4	11891.3	12653	1.08277		0.846289	0.211726	0.12224
	Null 6	3898.13	11782.4	0.381178		0.5426	0.140389	0.0810534
Experiment 3	Null 8	751.527	11284.8	0.0767283		0.210472	0.125425	0.0724144
	DKO 0	14605.7	12654.8	1		1	0	0
	DKO 2	11678.1	12737.2	0.794388		0.863656	0.0733869	0.04237	0.479334
	DKO 4	5310.43	11208.9	0.410487		0.430087	0.0887041	0.0512133	0.0348369
	DKO 6	192.435	10572.6	0.0157701		0.127842	0.124423	0.0718354	0.0186254
	DKO 8	36.021	8980.25	0.00347536		0.018867	0.0215185	0.0124237	0.0595541
