# Supplementary material for: The transcription factors TFE3 and TFEB amplify p53 dependent transcriptional programs in response to DNA damage
Source: eLife journal article supplement (doi:10.7554/elife.40856), 2018-12-06
Supplement: supp [file elife-40856-supp-v1.zip › elife_poa_e40856_Figure_4_source_data_4.xlsx]

## Sheet: Source data for Figure 4G
Source data for Figure 4G : Quantification of p53 levels treated with Nut3 in WT and DKO Raw264.7 cells
			Etop +DMSO	Etop + Nut3
	RAW264.7 WT	p53	18572.6	26206.3
		GAPDH	13889.2	21857.2
Experiment 1		normalized p53	1	0.896633
	RAW264.7 DKO	p53	3137.36	25033.2
		GAPDH	22453.1	16120
		normalized p53	0.104494	1.16133
	RAW264.7 WT	p53	8990.42	25451.5
		GAPDH	25254	15765.2
Experiment 2		normalized p53	1	4.53485
	RAW264.7 DKO	p53	1066.16	22165.3
		GAPDH	16462.2	10790.7
		normalized p53	0.181922	5.76999
	RAW264.7 WT	p53	10479.9	38699.8
		GAPDH	41167.6	30476.4
Experiment 3		normalized p53	1	4.98822
	RAW264.7 DKO	p53	138.314	23760.4
		GAPDH	27267	22927.6
		normalized p53	0.0199264	4.07094
	WT DMSO	WT Nut3	DKO DMSO	DKO Nut3
Experiment 1	1	0.896633	0.104494	1.16133
Experiment 2	1	4.53485	0.181922	5.76999
Experiment 3	1	4.98822	0.0199264	4.07094
Mean	1	3.47323	0.102114	3.66742
Stdev	0	2.24289	0.081024	2.33068
Stdev error	0	1.29493	0.0467793	1.34562
p-value			4.34172e-05	0.922187
