# Supplementary material for: The transcription factors TFE3 and TFEB amplify p53 dependent transcriptional programs in response to DNA damage
Source: eLife journal article supplement (doi:10.7554/elife.40856), 2018-12-06
Supplement: supp [file elife-40856-supp-v1.zip › elife_poa_e40856_Figure_5_figure_supplement_1_source_data_1.xlsx]

## Sheet: Source data for Figure 5 suppl
Source data for Figure 5 supplement : qPCR analysis of expression of DNA damage response and p53-dependent genes
		UVRAG	DRAM1	TRP53INP1	BBC3	SESN1	SESN2	BAX	RAD9A	TP53	MDM2	UBE2B	UBE4B
	Experiment 1	1	1	1	1	1	1	1	1	1	1	1	1
	Experiment 2	1	1	1	1	1	1	1	1	1	1	1	1
Ad-Null	Experiment 3	1	1	1	1	1	1	1	1	1	1	1	1
	Mean	1	1	1	1	1	1	1	1	1	1	1	1
	Stdev	0	0	0	0	0	0	0	0	0	0	0	0
		UVRAG	DRAM1	TRP53INP1	BBC3	SESN1	SESN2	BAX	RAD9A	TP53	MDM2	UBE2B	UBE4B
	Experiment 1	3.13254	1.20632	1.69802	10.8803	1.60695	2.10161	1.40206	2.93231	0.771774	1.2708	3.82643	1.58802
	Experiment 2	3.10777	1.11074	2.08191	12.906	1.90246	2.46529	1.20969	2.86927	0.889251	1.08074	3.44371	1.57614
Ad-TFEB S211A	Experiment 3	3.675	1.17577	2.00774	11.9646	2.06891	1.28313	1.37184	2.99579	0.517919	1.30113	3.83505	1.58207
	Mean	3.29509	1.16359	1.92178	11.8881	1.84936	1.88031	1.3251	2.932	0.708368	1.2135	3.69712	1.58207
	Stdev	0.320577	0.0488125	0.203631	1.01367	0.233963	0.605485	0.103453	0.0632628	0.189794	0.119453	0.223496	0.0084024
	p-value	0.000239021	0.00431498	0.00138619	4.86194e-05	0.00312819	0.0531188	0.00536607	7.63888e-07	0.0669353	0.0343657	3.07498e-05	0.000104171
		UVRAG	DRAM1	TRP53INP1	BBC3	SESN1	SESN2	BAX	RAD9A	TP53	MDM2	UBE2B	UBE4B
	Experiment 1	2.58493	2.14324	1.71463	4.9449	1.62439	1.79422	2.09791	6.05803	0.954393	1.06946	2.9611	1.49675
	Experiment 2	2.9532	1.88419	1.63188	6.20229	2.26796	2.43337	2.25412	7.40143	1.07122	1.01737	3.21676	1.54811
Ad-TFE3 S321A	Experiment 3	3.67351	2.49338	2.06996	9.46066	2.65439	1.83028	2.7406	9.81143	0.902445	1.38881	3.49091	1.52222
	Mean	3.03814	2.15938	1.79586	6.62029	2.13844	1.99925	2.34893	7.60548	0.973515	1.14752	3.21566	1.52222
	Stdev	0.553692	0.305724	0.232747	2.3306	0.52032	0.359055	0.335193	1.90179	0.0864425	0.201107	0.264961	0.0363159
	p-value	0.00292816	0.00265663	0.00389618	0.012044	0.0170243	0.00794669	0.00213519	0.00353769	0.655985	0.243852	0.000130421	0.00240732
