# Supplementary material for: The transcription factors TFE3 and TFEB amplify p53 dependent transcriptional programs in response to DNA damage
Source: eLife journal article supplement (doi:10.7554/elife.40856), 2018-12-06
Supplement: supp [file elife-40856-supp-v1.zip › elife_poa_e40856_Figure_5_source_data_1.xlsx]

## Sheet: Source data for Figrure 5B
Source data for Figrure 5B : Quantification of p53 levels transfected with TFEB and TFE3 mutants
		Ad-Null	Ad-S211A	Ad-S321A		Ad-Null	Ad-S211A	Ad-S321A		Ad-Null	Ad-S211A	Ad-S321A
Experiment 1		1588.36	5814.69	3358.94		14451.6	9666.33	23477.8		0.109909	0.601541	0.143069
Experiment 2		696.163	9424.47	1986.55		15609.1	10924.9	9493.47		0.0445999	0.862661	0.209254
Experiment 3	p53	3022.26	15617	7638.26	gapdh	26188.5	26283.3	11632	normalized p53	0.115404	0.594177	0.656659
Experiment 4		2527.18	14239	4927.98		23583.1	17228.9	11403.8		0.107161	0.826463	0.432134
Experiment 5		303.607	20729.9	3167.67		9081.539 16579.418 18175.882				0.0334312	1.25034	0.174279
Total p53 Statistics	Ad-Null	Ad-S211A	Ad-S321A
Experiment 1	0.768223	4.20456	1
Experiment 2	0.213137	4.12255	1
Experiment 3	0.175744	0.904849	1
Experiment 4	0.24798	1.91252	1
Experiment 5	0.191826	7.17438	1
Mean	0.319382	3.66377	1
Stdev	0.252362	2.42414	0
p-value		0.0153867	0.000312555
