# Supplementary material for: The transcription factors TFE3 and TFEB amplify p53 dependent transcriptional programs in response to DNA damage
Source: eLife journal article supplement (doi:10.7554/elife.40856), 2018-12-06
Supplement: supp [file elife-40856-supp-v1.zip › elife_poa_e40856_Figure_5_source_data_2.xlsx]

## Sheet: Source data for Figure 5E
Source data for Figure 5E : Quantification of p53 with chx treated hela cells
	Time (min CHX)	0	5	15	30	60	90
	p53
	Ad-Null	13655	12679.8	3416.69	2698.72	2038.96	1732.74
Experiment 1	Ad-S211A	21437	16628.1	12381.3	11242	10308.1	9576.71
	Ad-S321A	20741.4	22138.3	8745.33	6362.62	3949.5	5896.1
	Ad-Null	13211	14318.4	6005.47	1860.38	2033.2	1497.75
Experiment 2	Ad-S211A	12662.2	24275.7	21086.1	16719.5	13839.9	7621.2
	Ad-S321A	20467	19633.1	16626.3	14519.3	9988.42	10948.5
	Ad-Null	17695.1	20510.4	9803.69	12575.2	11754.6	6619.33
Experiment 3	Ad-S211A	21054.8	11291.8	10513.3	7340.76	6136.98	4681.1
	Ad-S321A	18514.9	9156.45	7412.74	4241.57	3940.45	3619.2
	Ad-Null	16451.7	6105.88	4293.47	1783.55	736.456	803.113
Experiment 4	Ad-S211A	21113.5	19871.5	12199.8	9741.93	12045.2	9537.81
	Ad-S321A	14083.3	6771.93	6821.93	6510.05	9023.71	2254.18
	Normalized p53
	Ad-Null	1	0.928585	0.250215	0.197636	0.14932	0.126894
Experiment 1	Ad-S211A	1	0.775673	0.577568	0.524419	0.480856	0.446737
	Ad-S321A	1	1.06735	0.421636	0.306759	0.190416	0.284267
	Ad-Null	1	1.08382	0.454581	0.14082	0.153902	0.113371
Experiment 2	Ad-S211A	1	1.91718	1.66528	1.32043	1.09301	0.601886
	Ad-S321A	1	0.959253	0.812346	0.709402	0.488025	0.534933
	Ad-Null	1	1.1591	0.554033	0.710657	0.664286	0.374076
Experiment 3	Ad-S211A	1	0.536306	0.49933	0.348651	0.291477	0.22233
	Ad-S321A	1	0.494545	0.400366	0.229089	0.212826	0.195475
	Ad-Null	1	0.371139	0.260974	0.108411	0.0447647	0.0488163
Experiment 4	Ad-S211A	1	0.941175	0.57782	0.461407	0.570495	0.451739
	Ad-S321A	1	0.480848	0.484398	0.462253	0.640738	0.16006
Ad-Null	Mean	1	0.685925	0.280056	0.161875	0.148075	0.0957926
	Stdev	0	0.375243	0.125816	0.0450291	0.0815886	0.0340881
Ad-S211A	Mean	1	1.04258	0.829999	0.663726	0.608959	0.430673
	Stdev	0	0.60629	0.558076	0.443798	0.34302	0.156442
	p-value			p<0.0001	p<0.001	p<0.001	p<0.01
Ad-321A	Mean	1	0.750498	0.529687	0.426876	0.383001	0.293684
	Stdev	0	0.304341	0.23196	0.257829	0.165735	0.176044
	p-value				p<0.05
