# Supplementary material for: The transcription factors TFE3 and TFEB amplify p53 dependent transcriptional programs in response to DNA damage
Source: eLife journal article supplement (doi:10.7554/elife.40856), 2018-12-06
Supplement: supp [file elife-40856-supp-v1.zip › elife_poa_e40856_Figure_6_source_data_1.xlsx]

## Sheet: Source data for Figure 6B
Source data for Figure 6B : Quantification of LMP with Etop treatment
	Etoposide (h)
Mean per cell	0	2	3	4	6
Experiment 1	0.95	1.375		5.09091	6
Experiment 2	1.02326	1.26667	2.4	5.44681	5.02
Experiment 3	0.657895	1.31034	1.27586	2.52174	4
Mean	0.87705	1.31734	1.83793	4.35315	5.00667
Stdev	0.193296	0.0545041	0.794886	1.596	1.00007
