# Supplementary material for: The transcription factors TFE3 and TFEB amplify p53 dependent transcriptional programs in response to DNA damage
Source: eLife journal article supplement (doi:10.7554/elife.40856), 2018-12-06
Supplement: supp [file elife-40856-supp-v1.zip › elife_poa_e40856_Figure_6_source_data_2.xlsx]

## Sheet: Source data for Figure 6D
Source data for Figure 6D : Quantification of LMP puncta with Etop treatment in WT and DKO MEFs
		MEF WT 8h	MEF DKO 8h
Experiment 1	Mean	7.67308	4.15789
	%
	<5	51.9231	71.0526
	6-10	19.2308	21.0526
	>11	28.8462	7.89474
Experiment 2	Mean	12.0857	5.04255
	%
	<5	17.1429	61.7021
	6-10	31.4286	21.2766
	>11	51.4286	17.0213
Experiment 3	Mean	7.68966	2.5098			Mean		Stdev
	%					MEF Null 8h	MEF DKO 8h	MEF Null 8h	MEF DKO 8h
	<5	44.8276	84.3137		<5	37.9645	72.3562	18.3778	11.362
	6-10	24.1379	7.84314		6-10	24.9324	16.7241	6.13759	7.69197
	>11	31.0345	7.84314		>11	37.1031	10.9197	12.4544	5.28417
