# Supplementary material for: The transcription factors TFE3 and TFEB amplify p53 dependent transcriptional programs in response to DNA damage
Source: eLife journal article supplement (doi:10.7554/elife.40856), 2018-12-06
Supplement: supp [file elife-40856-supp-v1.zip › elife_poa_e40856_Figure_7_source_data_1.xlsx]

## Sheet: Source data for Figure 7B
Source data for Figure 7B : Quantification of cleaved Casp3
		WT 16h	DKO 16h
	Cleaved Casp3	26854.1	1467.6
Experiment 1	GAPDH	3866.26	9883.15
	CASP3/GAPDH	6.94577	0.148495
	Normalized Casp3	1	0.0213792
	Cleaved Casp3	24096.8	1649.94
Experiment 2	GAPDH	3389.91	15945
	CASP3/GAPDH	7.10837	0.103477
	Normalized Casp3	1	0.014557
	Cleaved Casp3	25038.6	1755.82
Experiment 3	GAPDH	6158.91	14492.7
	CASP3/GAPDH	4.06543	0.121152
	Normalized Casp3	1	0.0298005
Mean		1	0.0219123
Stdev		0	0.00763573
p-value			2.47594e-09
