# Supplementary material for: The transcription factors TFE3 and TFEB amplify p53 dependent transcriptional programs in response to DNA damage
Source: eLife journal article supplement (doi:10.7554/elife.40856), 2018-12-06
Supplement: supp [file elife-40856-supp-v1.zip › elife_poa_e40856_Figure_7_source_data_2.xlsx]

## Sheet: Source data for Figure 7D
Source data for Figure 7D : Quantification of Annexin V/7-AAD flow cytometry assay
	WT Untreated				DKO Untreated
	Q3 Viable	Q4 Early Apoptosis	Q2 Late Apoptosis/Necrosis	Q1 Necrosis/non-viable	Q3 Viable	Q4 Early Apoptosis	Q2 Late Apoptosis/Necrosis	Q1 Necrosis/non-viable
Experiment 1	98.9	0.2	0.6	0.3	99.2	0.1	0.5	0.3
Experiment 2	98.5	0.2	0.8	0.5	97.3	0.2	1.5	1.1
Experiment 3	97.7	0.2	1.6	0.5	97	0.2	2.1	0.7
Mean	98.3667	0.2	1	0.433333	97.8333	0.166667	1.36667	0.7
Stdev	0.61101	3.39935e-17	0.52915	0.11547	1.19304	0.057735	0.80829	0.4
p-value					0.528611	0.373901	0.546843	0.32946
	WT 16h Etop				DKO 16h Etop
	Q3 Viable	Q4 Early Apoptosis	Q2 Late Apoptosis/Necrosis	Q1 Necrosis/non-viable	Q3 Viable	Q4 Early Apoptosis	Q2 Late Apoptosis/Necrosis	Q1 Necrosis/non-viable
Experiment 1	41.6	13.6	33.1	11.7	92.7	3	3.4	0.9
Experiment 2	44	7.6	26.8	21.6	93	2.2	3.6	1.3
Experiment 3	41.6	11.8	40.5	6.1	85.8	6.2	6.9	1.1
Mean	42.4	11	33.4667	13.1333	90.5	3.8	4.63333	1.1
Stdev	1.38564	3.07896	6.85736	7.84878	4.07308	2.1166	1.96554	0.2
p-value					4.19237e-05	0.0288969	0.00219108	0.0567072
	WT 24h Etop				DKO 24h Etop
	Q3 Viable	Q4 Early Apoptosis	Q2 Late Apoptosis/Necrosis	Q1 Necrosis/non-viable	Q3 Viable	Q4 Early Apoptosis	Q2 Late Apoptosis/Necrosis	Q1 Necrosis/non-viable
Experiment 1	15.5	14.1	60.1	10.4	70.1	18.8	8.2	2.9
Experiment 2	28.5	11.4	37.8	22.4	72.1	17.4	7.5	3
Experiment 3	12.1	18.2	64.2	5.5	41.7	31.2	22.2	4.8
Mean	18.7	14.5667	54.0333	12.7667	61.3	22.4667	12.6333	3.56667
Stdev	8.65563	3.42394	14.2072	8.69502	17.0035	7.59561	8.29237	1.06927
p-value					0.0180365	0.17587	0.0120711	0.143053
