# Supplementary material for: The transcription factors TFE3 and TFEB amplify p53 dependent transcriptional programs in response to DNA damage
Source: eLife journal article supplement (doi:10.7554/elife.40856), 2018-12-06
Supplement: supp [file elife-40856-supp-v1.zip › elife_poa_e40856_Figure_9_source_data_1.xlsx]

## Sheet: Source data for Figure 9B
Source data for Figure 9B : qPCR data for CDK4 and CDK7 with TFEB and TFE3 mutants
		Experiment 1	Experiment 2	Experiment 3	Mean	Stdev	p value
	Null	1	1.04174	1.08298	1.04157	0.0414884
CDK7	TFEBS211A	5.10414	5.01645	5.14677	5.08912	0.066446	4.67273e-08
	TFE3S321A	2.78305	2.80824	2.78691	2.79274	0.0135678	1.28509e-07
	Null	1	0.950001	0.991717	0.980573	0.026798
CDK4	TFEBS211A	7.67235	9.09244	8.44834	8.40437	0.711065	2.75694e-05
	TFE3S321A	4.68701	4.84893	4.8523	4.79608	0.0944738	1.46048e-07
