# Supplementary material for: The transcription factors TFE3 and TFEB amplify p53 dependent transcriptional programs in response to DNA damage
Source: eLife journal article supplement (doi:10.7554/elife.40856), 2018-12-06
Supplement: supp [file elife-40856-supp-v1.zip › elife_poa_e40856_Figure_9_source_data_2.xlsx]

## Sheet: Source data for Figure 9C
Source data for Figure 9C : Quantification of protein levels of CDK4 and CDK7
		Cdk4	gapdh	normalized Cdk4
	Null	28044.2	51359.6	1
Experiment 1	TFEBS211A	47664.7	48788	1.78922
	TFE3S321A	49431.9	56439.6	1.60399
	Null	20370.7	43991.9	1
Experiment 2	TFEBS211A	44895.8	46834.6	2.07017
	TFE3S321A	54493.6	46178.8	2.54841
							Mean	Stdev	Stdev error	p-value
	Null	26243.3	43149.4	1		Null	1	0	0
Experiment 3	TFEBS211A	48607.2	43167.1	1.85142		TFEBS211A	1.9036	0.147563	0.0851957	0.000223652
	TFE3S321A	50222.2	49864.9	1.65599		TFE3S321A	1.93613	0.530886	0.306507	0.0189364
		Cdk7	gapdh	normalizd Cdk7
	Null	30702.1	51359.6	1
Experiment 1	TFEBS211A	44938.5	48788	1.54085
	TFE3S321A	48674.6	56439.6	1.44269
	Null	19343.3	43991.9	1
Experiment 2	TFEBS211A	42589.6	46834.6	2.06814
	TFE3S321A	30955.6	46178.8	1.52454
							Mean	Stdev	Stdev error	p-value
	Null	25322.4	43149.4	1		Null	1	0	0
Experiment 3	TFEBS211A	43813.8	43167.1	1.72953		TFEBS211A	1.77951	0.267173	0.154252	0.00360681
	TFE3S321A	41825.4	49864.9	1.42927		TFE3S321A	1.4655	0.0515685	0.0297731	4.88629e-05
