# Supplementary material for: The transcription factors TFE3 and TFEB amplify p53 dependent transcriptional programs in response to DNA damage
Source: eLife journal article supplement (doi:10.7554/elife.40856), 2018-12-06
Supplement: supp [file elife-40856-supp-v1.zip › elife_poa_e40856_Figure_9_source_data_3.xlsx]

## Sheet: Source data for Figure 9F
Source data for Figure 9F : Qauntification of phoshpo-Rb/total Rb protein ratio
		phospho Rb	Rb
	null 0	13385.4	7938.43
	null 2	9056.96	6988.01
	null 4	10076.4	8752.67
	null 8	10424.1	13542.7
Experiment 1	dko 0	13304.5	10577.1
	dko 2	3707.72	8234.84
	dko 4	3067.3	7787.26
	dko 8	1254.06	4644.43
	dko 8	1254.06	4644.43			normalized phospho Rb
						Experiment 1	Experiment 2	Experiment 3	Mean	Stdev	p-value
	null 0	13780.1	8980.96			1	1	1	1	0
	null 2	12943	13959.3			0.768657	0.604284	0.68856	0.687167	0.0821956
	null 4	4636.43	10826.3			0.682763	0.279109	0.81888	0.593584	0.280718
	null 8	6357.72	10572.5			0.456496	0.391914	0.853827	0.567413	0.250135
Experiment 2	dko 0	11348.6	9295.96			0.745996	0.795639	0.542996	0.694877	0.133854	0.00842146
	dko 2	4542.55	15522			0.267027	0.190731	0.366367	0.274709	0.0880694	0.00202621
	dko 4	260.678	9821.92			0.233602	0.0172973	0.347304	0.199401	0.167641	0.0493426
	dko 8	252.849	9196.67			0.160137	0.0179184	0.20583	0.127962	0.0980004	0.0235942
	null 0	14969.1	7387.84
	null 2	11596.8	8312.25
	null 4	10482.2	4244.35
	null 8	10862.3	6278.72
Experiment 3	dko 0	15120	13742.8
	dko 2	6516.65	8778.67
	dko 4	3112.43	3434.13
	dko 8	1845.53	4425.2
