# Supplementary material for: The transcription factors TFE3 and TFEB amplify p53 dependent transcriptional programs in response to DNA damage
Source: eLife journal article supplement (doi:10.7554/elife.40856), 2018-12-06
Supplement: supp [file elife-40856-supp-v1.zip › elife_poa_e40856_Supplementary_File_1.csv]

Supplementary Table 1	log2FC	pval	qval	MEF WT Etop	MEF WT Etop	MEF WT Etop	MEF TFEB/TFE3 DKO Etop	MEF TFEB/TFE3 DKO Etop	MEF TFEB/TFE3 DKO Etop	MEF WT Etop normalized	MEF WT Etop normalized	MEF WT Etop normalized	MEF TFEB/TFE3 DKO Etop normalized	MEF TFEB/TFE3 DKO Etop normalized	MEF /TFE3 DKO Etop normalized	symbol	ensmbl	entrez	name
Hoxa5	-8.230989717	2.80E-08	1.68E-07	1191	1049	902	7	1	1	3.994336654	3.797878038	3.850158435	-2.594808743	-5.119471787	-5.336315493	Hoxa5	ENSMUSG00000038253	15402	homeobox A5
Pabpc4l	-8.088734388	6.43E-09	5.26E-08	425	395	300	0	0	2	2.510012759	2.391224443	2.264841013	-6.138067722	-6.138067722	-4.823989504	Pabpc4l	ENSMUSG00000090919	241989	poly(A) binding protein, cytoplasmic 4-like
Tmem37	-7.986001874	6.01E-07	2.18E-06	2597	2361	2451	17	18	1	5.118313213	4.967442715	5.29143161	-1.389396011	-1.855106578	-5.336315493	Tmem37	ENSMUSG00000050777	170706	transmembrane protein 37
Mab21l1	-7.950123259	4.53E-13	5.36E-11	3587	3319	2546	8	15	11	5.584082167	5.458604299	5.346274028	-2.417716017	-2.103394675	-2.940298592	Mab21l1	ENSMUSG00000056947	17116	mab-21-like 1 (C. elegans)
Tram1l1	-7.83666015	1.80E-09	1.91E-08	1413	1541	1206	1	9	10	4.24072275	4.352259906	4.268830908	-4.803165618	-2.78283762	-3.06216365	Tram1l1	ENSMUSG00000044528	229801	translocation associated membrane protein 1-like 1
Tmem47	-7.78817809	9.81E-14	2.04E-11	2421	2197	1826	5	10	11	5.017113151	4.863628418	4.866926912	-3.031565593	-2.645001603	-2.940298592	Tmem47	ENSMUSG00000025666	192216	transmembrane protein 47
Tspan12	-7.734897876	1.34E-12	1.05E-10	1320	1328	1099	3	4	8	4.142575552	4.137809043	4.134895843	-3.660973051	-3.786500108	-3.34194003	Tspan12	ENSMUSG00000029669	269831	tetraspanin 12
P2ry1	-7.719372114	1.34E-09	1.51E-08	1066	1086	815	6	2	3	3.83452139	3.847837283	3.703982681	-2.796722105	-4.528363528	-4.446689355	P2ry1	ENSMUSG00000027765	18441	purinergic receptor P2Y, G-protein coupled 1
Mab21l2	-7.638111955	3.39E-10	5.38E-09	1759	1685	1299	8	8	4	4.556503615	4.481055922	4.375926351	-2.417716017	-2.935247198	-4.147886761	Mab21l2	ENSMUSG00000057777	23937	mab-21-like 2 (C. elegans)
Pctp	-7.590367083	2.80E-10	4.65E-09	472	538	468	1	1	3	2.660978638	2.835939689	2.904856164	-4.803165618	-5.119471787	-4.446689355	Pctp	ENSMUSG00000020553	18559	phosphatidylcholine transfer protein
Wnt5a	-7.555844731	7.34E-11	1.65E-09	1153	1092	938	2	8	5	3.947598114	3.855778219	3.906564408	-4.121868359	-2.935247198	-3.900477895	Wnt5a	ENSMUSG00000021994	22418	wingless-type MMTV integration site family, member 5A
Cited4	-7.547588446	2.61E-08	1.59E-07	261	218	233	0	1	0	1.808857633	1.536866879	1.901433595	-6.138067722	-5.119471787	-6.138067722	Cited4	ENSMUSG00000070803	56222	Cbp/p300-interacting transactivator, with Glu/Asp-rich carboxy-terminal domain, 4
Itm2a	-7.545559625	6.01E-11	1.46E-09	1730	1644	1565	4	14	7	4.532534762	4.445540506	4.644519875	-3.31221402	-2.196656353	-3.505213359	Itm2a	ENSMUSG00000031239	16431	integral membrane protein 2A
Sox11	-7.504320126	4.36E-12	2.14E-10	2587	2778	2287	12	14	11	5.112749533	5.201992984	5.191554999	-1.869707915	-2.196656353	-2.940298592	Sox11	ENSMUSG00000063632	20666	SRY (sex determining region Y)-box 11
Bcam	-7.463621157	2.78E-13	3.78E-11	6365	6236	5529	22	44	32	6.411278548	6.368258681	6.464788479	-1.029675411	-0.610070431	-1.50679192	Bcam	ENSMUSG00000002980	57278	basal cell adhesion molecule
Cxxc4	-7.16707921	2.51E-08	1.54E-07	242	264	234	0	1	2	1.70027384	1.811846041	1.907588737	-6.138067722	-5.119471787	-4.823989504	Cxxc4	ENSMUSG00000044365	319478	CXXC finger 4
Pitx2	-7.148485446	3.13E-07	1.25E-06	495	399	311	5	0	2	2.729469801	2.405721389	2.316642327	-3.031565593	-6.138067722	-4.823989504	Pitx2	ENSMUSG00000028023	18741	paired-like homeodomain transcription factor 2
Gria3	-7.143040661	6.75E-08	3.45E-07	691	697	493	1	12	2	3.209850612	3.208837548	2.979796574	-4.803165618	-2.403482126	-4.823989504	Gria3	ENSMUSG00000001986	53623	glutamate receptor, ionotropic, AMPA3 (alpha 3)
Gm53	-7.126620233	6.27E-07	2.26E-06	337	263	191	0	0	7	2.176237269	1.806393096	1.615881531	-6.138067722	-6.138067722	-3.505213359	Gm53	NA	193022	predicted gene 53
Icosl	-7.122498666	6.93E-08	3.52E-07	677	599	561	1	12	2	3.180366518	2.990597322	3.165894911	-4.803165618	-2.403482126	-4.823989504	Icosl	ENSMUSG00000000732	50723	icos ligand
Cd34	-7.104259071	1.03E-11	3.96E-10	18883	19304	16823	129	143	106	7.979974554	7.998297795	8.069977297	1.48700758	1.068559104	0.179905749	Cd34	ENSMUSG00000016494	12490	CD34 antigen
Man1a	-7.084323891	5.15E-09	4.41E-08	839	844	637	1	6	12	3.489445115	3.484535961	3.348915168	-4.803165618	-3.298979292	-2.827930519	Man1a	ENSMUSG00000003746	17155	mannosidase 1, alpha
Slc16a13	-7.072390905	4.03E-08	2.26E-07	302	202	204	1	1	0	2.018562399	1.427453116	1.710452074	-4.803165618	-5.119471787	-6.138067722	Slc16a13	ENSMUSG00000044367	69309	solute carrier family 16 (monocarboxylic acid transporters), member 13
Ctsc	-7.004885107	1.18E-08	8.47E-08	2007	1970	1701	13	26	6	4.746681174	4.706370252	4.764674875	-1.760000954	-1.347576962	-3.689351105	Ctsc	ENSMUSG00000030560	13032	cathepsin C
Tbx5	-6.997782566	1.19E-08	8.53E-08	434	430	399	1	1	8	2.540170383	2.51339058	2.675209301	-4.803165618	-5.119471787	-3.34194003	Tbx5	ENSMUSG00000018263	21388	T-box 5
Ano3	-6.968461301	6.11E-10	8.30E-09	1411	1502	925	3	9	22	4.238680808	4.315303898	3.886449048	-3.660973051	-2.78283762	-2.021139478	Ano3	ENSMUSG00000074968	228432	anoctamin 3
Armcx4	-6.919894311	9.67E-12	3.78E-10	1838	2096	1550	12	16	12	4.619847481	4.79576617	4.630633359	-1.869707915	-2.015797488	-2.827930519	Armcx4	ENSMUSG00000049804	100503043	armadillo repeat containing, X-linked 4
Rhbdf2	-6.907819278	4.15E-12	2.06E-10	1621	1692	1284	7	16	12	4.438706332	4.487033105	4.359181649	-2.594808743	-2.015797488	-2.827930519	Rhbdf2	ENSMUSG00000020806	217344	rhomboid 5 homolog 2
Ripk3	-6.878543406	4.09E-10	6.21E-09	1058	1101	975	10	5	8	3.823664437	3.867608265	3.962326866	-2.117846781	-3.522243839	-3.34194003	Ripk3	ENSMUSG00000022221	56532	receptor-interacting serine-threonine kinase 3
Cyba	-6.860103782	1.95E-09	2.04E-08	2653	2660	2486	24	28	12	5.149079426	5.139397318	5.311880058	-0.907633835	-1.24439019	-2.827930519	Cyba	ENSMUSG00000006519	13057	cytochrome b-245, alpha polypeptide
Armcx1	-6.856587972	1.56E-10	2.98E-09	727	828	599	2	7	8	3.283010629	3.456959094	3.260305339	-4.121868359	-3.105680466	-3.34194003	Armcx1	ENSMUSG00000033460	78248	armadillo repeat containing, X-linked 1
Tmlhe	-6.802297621	6.47E-10	8.67E-09	538	483	412	2	2	7	2.849400559	2.680683365	2.721363693	-4.121868359	-4.528363528	-3.505213359	Tmlhe	ENSMUSG00000079834	192289	trimethyllysine hydroxylase, epsilon
Esx1	-6.784698006	9.59E-08	4.63E-07	196	205	146	1	0	1	1.397599139	1.448610275	1.230335772	-4.803165618	-6.138067722	-5.336315493	Esx1	ENSMUSG00000023443	13984	extraembryonic, spermatogenesis, homeobox 1
Hand2	-6.767724441	1.97E-09	2.06E-08	534	679	590	6	3	4	2.838655419	3.171149198	3.238496901	-2.796722105	-4.11026294	-4.147886761	Hand2	ENSMUSG00000038193	15111	heart and neural crest derivatives expressed transcript 2
Emb	-6.741083803	2.34E-08	1.46E-07	945	1039	742	10	10	3	3.660884032	3.78407319	3.568756447	-2.117846781	-2.645001603	-4.446689355	Emb	ENSMUSG00000021728	13723	embigin
Pcdh7	-6.707125405	7.07E-09	5.65E-08	437	394	358	4	2	2	2.550084443	2.38757733	2.51914739	-3.31221402	-4.528363528	-4.823989504	Pcdh7	ENSMUSG00000029108	54216	protocadherin 7
Chic1	-6.652475986	4.83E-11	1.24E-09	1203	1271	1072	5	9	23	4.008787062	4.074570113	4.09903873	-3.031565593	-2.78283762	-1.96062884	Chic1	ENSMUSG00000031327	12212	cysteine-rich hydrophobic domain 1
Hoxa6	-6.627783619	1.61E-07	7.16E-07	151	165	136	0	1	1	1.023609295	1.137270663	1.128615897	-6.138067722	-5.119471787	-5.336315493	Hoxa6	ENSMUSG00000043219	15403	homeobox A6
Tbx3	-6.609850554	1.33E-11	4.76E-10	1624	1477	1228	6	18	20	4.441372129	4.291106328	4.294892524	-2.796722105	-1.855106578	-2.150351998	Tbx3	ENSMUSG00000018604	21386	T-box 3
Lrrc15	-6.60483363	3.61E-08	2.06E-07	1120	1016	1070	14	3	18	3.905743452	3.7518116	4.096346855	-1.658050119	-4.11026294	-2.292285925	Lrrc15	ENSMUSG00000052316	74488	leucine rich repeat containing 15
Ndn	-6.600522133	2.12E-08	1.34E-07	235	220	157	1	1	1	1.658115309	1.549978086	1.334520106	-4.803165618	-5.119471787	-5.336315493	Ndn	ENSMUSG00000033585	17984	necdin
Abcg1	-6.595007425	6.18E-11	1.49E-09	911	926	823	7	5	13	3.6080812	3.618143083	3.718059773	-2.594808743	-3.522243839	-2.723685638	Abcg1	ENSMUSG00000024030	11307	ATP-binding cassette, sub-family G (WHITE), member 1
Tspan6	-6.593674339	5.20E-10	7.34E-09	1571	1649	1347	11	24	10	4.393535485	4.449918755	4.428239613	-1.988449026	-1.458716487	-3.06216365	Tspan6	ENSMUSG00000067377	56496	tetraspanin 6
Renbp	-6.579677909	3.81E-09	3.48E-08	577	627	448	3	9	3	2.950173575	3.05639166	2.841968466	-3.660973051	-2.78283762	-4.446689355	Renbp	ENSMUSG00000031387	19703	renin binding protein
Eda2r	-6.552642882	3.73E-15	4.28E-12	11523	11965	9838	92	96	154	7.267454758	7.308267509	7.29603338	1.002278375	0.498424149	0.713124478	Eda2r	ENSMUSG00000034457	245527	ectodysplasin A2 receptor
Gng11	-6.548006102	7.28E-07	2.58E-06	103	168	118	1	0	0	0.476393142	1.163099563	0.92522454	-4.803165618	-6.138067722	-6.138067722	Gng11	ENSMUSG00000032766	66066	guanine nucleotide binding protein (G protein), gamma 11
Lmo1	-6.527011534	7.17E-07	2.54E-06	227	199	185	0	5	1	1.608375577	1.405981063	1.570050909	-6.138067722	-3.522243839	-5.336315493	Lmo1	ENSMUSG00000036111	109594	LIM domain only 1
Pcdh10	-6.522948212	5.36E-09	4.56E-08	284	276	254	1	3	2	1.930225177	1.875722678	2.025478721	-4.803165618	-4.11026294	-4.823989504	Pcdh10	ENSMUSG00000049100	18526	protocadherin 10
Hoxb13	-6.51086105	1.90E-08	1.23E-07	458	423	393	6	2	3	2.617638379	2.489770954	2.65339883	-2.796722105	-4.528363528	-4.446689355	Hoxb13	ENSMUSG00000049604	15408	homeobox B13
Dclk2	-6.503568506	4.16E-11	1.10E-09	1103	1014	944	6	15	10	3.883698575	3.74897185	3.915754663	-2.796722105	-2.103394675	-3.06216365	Dclk2	ENSMUSG00000028078	70762	doublecortin-like kinase 2
Panx1	-6.502566805	5.57E-09	4.69E-08	610	513	562	2	11	5	3.0302681	2.767432149	3.168460209	-4.121868359	-2.519193702	-3.900477895	Panx1	ENSMUSG00000031934	55991	pannexin 1
Lrrc3	-6.49533015	2.95E-10	4.84E-09	738	861	770	3	8	16	3.304644713	3.513270064	3.622132928	-3.660973051	-2.935247198	-2.449722497	Lrrc3	ENSMUSG00000051652	237387	leucine rich repeat containing 3
Meiob	-6.4783104	5.41E-07	1.99E-06	195	200	161	0	4	1	1.390259481	1.413173981	1.370614415	-6.138067722	-3.786500108	-5.336315493	Meiob	ENSMUSG00000024155	75178	meiosis specific with OB domains
Cd1d1	-6.473257505	5.71E-10	7.85E-09	331	416	335	2	3	4	2.150402049	2.465758186	2.423594221	-4.121868359	-4.11026294	-4.147886761	Cd1d1	ENSMUSG00000028076	12479	CD1d1 antigen
5033428I22Rik	-6.461405726	1.81E-06	5.66E-06	154	180	125	0	4	0	1.051794794	1.262025271	1.007761561	-6.138067722	-3.786500108	-6.138067722	5033428I22Rik	ENSMUSG00000097910	75996	RIKEN cDNA 5033428I22 gene
Bche	-6.452239711	1.88E-11	6.15E-10	839	902	692	4	9	13	3.489445115	3.58030271	3.468234029	-3.31221402	-2.78283762	-2.723685638	Bche	ENSMUSG00000027792	12038	butyrylcholinesterase
Lce1g	-6.426414675	3.56E-07	1.40E-06	139	115	139	0	1	1	0.90501525	0.620481865	1.15989191	-6.138067722	-5.119471787	-5.336315493	Lce1g	ENSMUSG00000027919	66195	late cornified envelope 1G
Slc25a43	-6.425131852	2.66E-07	1.09E-06	151	139	151	0	1	2	1.023609295	0.89163043	1.278626818	-6.138067722	-5.119471787	-4.823989504	Slc25a43	ENSMUSG00000037636	194744	solute carrier family 25, member 43
Pnmal2	-6.390135413	1.00E-06	3.41E-06	125	121	97	1	0	0	0.75308316	0.693194184	0.644827833	-4.803165618	-6.138067722	-6.138067722	Pnmal2	ENSMUSG00000070802	434128	PNMA-like 2
LOC102636514	-6.378589808	3.63E-07	1.42E-06	150	157	129	0	2	1	1.014090419	1.066043657	1.052888607	-6.138067722	-4.528363528	-5.336315493	NA	NA	NA	NA
Nptx1	-6.37402211	9.12E-12	3.62E-10	1014	979	895	7	8	18	3.762445239	3.698349432	3.838929793	-2.594808743	-2.935247198	-2.292285925	Nptx1	ENSMUSG00000025582	18164	neuronal pentraxin 1
Fam213b	-6.370259057	2.66E-06	7.92E-06	74	82	91	0	0	0	0.005104657	0.137896145	0.553573205	-6.138067722	-6.138067722	-6.138067722	Fam213b	ENSMUSG00000029059	66469	family with sequence similarity 213, member B
Pcbd1	-6.34726196	2.11E-07	9.04E-07	480	535	434	8	1	9	2.685172201	2.827888495	2.796256936	-2.417716017	-5.119471787	-3.195280444	Pcbd1	ENSMUSG00000020098	13180	pterin 4 alpha carbinolamine dehydratase/dimerization cofactor of hepatocyte nuclear factor 1 alpha (TCF1) 1
Cacng1	-6.310957642	1.84E-09	1.94E-08	673	688	647	3	14	8	3.17183062	3.190116439	3.371356433	-3.660973051	-2.196656353	-3.34194003	Cacng1	ENSMUSG00000020722	12299	calcium channel, voltage-dependent, gamma subunit 1
Gabre	-6.301365343	1.42E-06	4.60E-06	122	93	86	0	1	0	0.718335059	0.3172992	0.472854541	-6.138067722	-5.119471787	-6.138067722	Gabre	ENSMUSG00000031340	14404	gamma-aminobutyric acid (GABA) A receptor, subunit epsilon
Cfh	-6.268725051	7.01E-07	2.49E-06	139	183	126	2	0	1	0.90501525	1.285731985	1.019176345	-4.121868359	-6.138067722	-5.336315493	Cfh	ENSMUSG00000026365	12628	complement component factor h
Dfna5	-6.259093537	6.07E-11	1.46E-09	588	605	486	5	6	7	2.977368825	3.0049509	2.959202642	-3.031565593	-3.298979292	-3.505213359	Dfna5	ENSMUSG00000029821	54722	deafness, autosomal dominant 5 (human)
Khdrbs3	-6.240787946	2.34E-06	7.11E-06	224	255	173	0	8	2	1.589271987	1.762011272	1.473776155	-6.138067722	-2.935247198	-4.823989504	Khdrbs3	ENSMUSG00000022332	13992	KH domain containing, RNA binding, signal transduction associated 3
Peg12	-6.240316952	1.96E-06	6.08E-06	97	80	95	0	0	1	0.390715928	0.102737597	0.615046393	-6.138067722	-6.138067722	-5.336315493	Peg12	ENSMUSG00000070526	27412	paternally expressed 12
Zdhhc15	-6.23363766	6.03E-11	1.46E-09	1363	1351	1211	7	16	33	4.188786594	4.162561761	4.274795478	-2.594808743	-2.015797488	-1.464162917	Zdhhc15	ENSMUSG00000033906	108672	zinc finger, DHHC domain containing 15
Kcnf1	-6.214626347	4.59E-10	6.71E-09	688	544	634	3	10	11	3.20358312	2.851908524	3.34211415	-3.660973051	-2.645001603	-2.940298592	Kcnj2	ENSMUSG00000041695	16518	potassium inwardly-rectifying channel, subfamily J, member 2
Sowahb	-6.204643187	4.27E-07	1.62E-06	168	159	147	0	2	3	1.176502007	1.084182787	1.240124162	-6.138067722	-4.528363528	-4.446689355	Sowahb	ENSMUSG00000045314	78088	sosondowah ankyrin repeat domain family member B
Fbxl7	-6.175979728	5.89E-07	2.14E-06	170	150	148	2	0	2	1.193468893	1.000698117	1.249846587	-4.121868359	-6.138067722	-4.823989504	Fbxl7	ENSMUSG00000043556	448987	F-box and leucine-rich repeat protein 7
Akr1e1	-6.157013175	2.38E-08	1.48E-07	256	247	222	2	1	5	1.781065826	1.71622067	1.831934987	-4.121868359	-5.119471787	-3.900477895	Akr1e1	ENSMUSG00000045410	56043	aldo-keto reductase family 1, member E1
Abca8b	-6.091556251	2.18E-10	3.83E-09	457	432	383	4	5	6	2.614492249	2.520068622	2.616298919	-3.31221402	-3.522243839	-3.689351105	Abca8b	ENSMUSG00000020620	27404	ATP-binding cassette, sub-family A (ABC1), member 8b
St14	-6.080345008	5.58E-11	1.39E-09	922	800	752	5	13	18	3.625376854	3.407393615	3.588046965	-3.031565593	-2.296366073	-2.292285925	St14	ENSMUSG00000031995	19143	suppression of tumorigenicity 14 (colon carcinoma)
1810034E14Rik	-6.065270758	9.07E-08	4.42E-07	357	404	415	4	10	2	2.259158819	2.423640091	2.731808238	-3.31221402	-2.645001603	-4.823989504	1810034E14Rik	ENSMUSG00000097101	66503	RIKEN cDNA 1810034E14 gene
Ccdc184	-6.06260567	1.04E-07	4.93E-07	228	280	202	2	5	1	1.614687637	1.896401494	1.696300188	-4.121868359	-3.522243839	-5.336315493	Ccdc184	ENSMUSG00000029875	239650	coiled-coil domain containing 184
Nav3	-6.039683065	9.94E-09	7.36E-08	657	624	487	11	4	9	3.137172841	3.049484085	2.962162692	-1.988449026	-3.786500108	-3.195280444	Nav3	ENSMUSG00000020181	260315	neuron navigator 3
Sorcs1	-6.028961053	3.57E-08	2.05E-07	227	232	204	2	1	5	1.608375577	1.626237467	1.710452074	-4.121868359	-5.119471787	-3.900477895	Sorcs1	ENSMUSG00000043531	58178	sortilin-related VPS10 domain containing receptor 1
Hoxb4	-6.020134727	1.98E-06	6.13E-06	241	169	153	4	0	3	1.694326096	1.171607448	1.297499543	-3.31221402	-6.138067722	-4.446689355	Hoxb4	ENSMUSG00000038692	15412	homeobox B4
Gm14015	-5.995222363	3.77E-06	1.08E-05	89	80	72	0	1	0	0.267940311	0.102737597	0.219381952	-6.138067722	-5.119471787	-6.138067722	Gm14015	ENSMUSG00000087226	329483	predicted gene 14015
Hoxb7	-5.987258998	1.05E-07	4.99E-07	203	213	165	3	1	2	1.447957076	1.503557886	1.405827689	-3.660973051	-5.119471787	-4.823989504	Hoxb7	ENSMUSG00000038721	15415	homeobox B7
Pdpn	-5.975690872	4.98E-10	7.13E-09	2129	2006	1806	34	17	41	4.831772782	4.732482147	4.851045814	-0.416480596	-1.933215921	-1.162075355	Pdpn	ENSMUSG00000028583	14726	podoplanin
Ptprg	-5.962049056	2.39E-12	1.46E-10	1084	1174	927	12	16	18	3.858654865	3.960138941	3.889562033	-1.869707915	-2.015797488	-2.292285925	Ptprg	ENSMUSG00000021745	19270	protein tyrosine phosphatase, receptor type, G
Hoxc13	-5.888794535	1.11E-07	5.25E-07	359	324	316	1	10	7	2.267194749	2.106221036	2.339587241	-4.803165618	-2.645001603	-3.505213359	Hoxc13	ENSMUSG00000001655	15422	homeobox C13
Parvb	-5.888239721	4.59E-09	4.03E-08	670	685	518	3	11	21	3.165395388	3.183821691	3.051035696	-3.660973051	-2.519193702	-2.084299634	Parvb	ENSMUSG00000022438	170736	parvin, beta
Trim6	-5.883483289	7.02E-10	9.21E-09	409	399	284	4	4	7	2.454791437	2.405721389	2.186009554	-3.31221402	-3.786500108	-3.505213359	Trim6	ENSMUSG00000072244	94088	tripartite motif-containing 6
Ak4	-5.87424534	1.62E-07	7.18E-07	1052	873	653	18	4	26	3.815467766	3.53321382	3.384655524	-1.309918261	-3.786500108	-1.792980542	Ak4	ENSMUSG00000028527	11639	adenylate kinase 4
Gng2	-5.867401787	1.17E-07	5.45E-07	342	366	351	1	7	13	2.197418739	2.281524804	2.490730097	-4.803165618	-3.105680466	-2.723685638	Gng2	ENSMUSG00000043004	14702	guanine nucleotide binding protein (G protein), gamma 2
Tmem51	-5.861735133	2.32E-07	9.75E-07	419	465	335	1	11	13	2.489551658	2.626014563	2.423594221	-4.803165618	-2.519193702	-2.723685638	Tmem51	ENSMUSG00000040616	214359	transmembrane protein 51
Tuba8	-5.834143375	7.95E-13	7.51E-11	2400	2187	1974	27	28	58	5.004550013	4.857049986	4.979309503	-0.741985034	-1.24439019	-0.6751454	Tuba8	ENSMUSG00000030137	53857	tubulin, alpha 8
Slc22a17	-5.799387559	5.26E-07	1.95E-06	429	446	357	13	2	7	2.523494034	2.565968914	2.515121886	-1.760000954	-4.528363528	-3.505213359	Slc22a17	ENSMUSG00000022199	59049	solute carrier family 22 (organic cation transporter), member 17
H2-Ab1	-5.786993983	8.50E-08	4.19E-07	213	161	159	2	1	4	1.516978224	1.102096682	1.352680136	-4.121868359	-5.119471787	-4.147886761	H2-Ab1	ENSMUSG00000073421	14961	histocompatibility 2, class II antigen A, beta 1
Atp10d	-5.776575348	5.84E-09	4.89E-08	1162	1061	969	8	38	17	3.958805387	3.814271359	3.95342945	-2.417716017	-0.816646122	-2.368857708	Atp10d	ENSMUSG00000046808	231287	ATPase, class V, type 10D
Capn6	-5.770186729	2.90E-11	8.46E-10	1670	1774	1558	13	39	43	4.481642628	4.555267321	4.638056131	-1.760000954	-0.780096843	-1.095496309	Capn6	ENSMUSG00000067276	12338	calpain 6
Chst15	-5.769868821	2.66E-07	1.09E-06	564	539	441	2	7	32	2.917358513	2.838613466	2.819293739	-4.121868359	-3.105680466	-1.50679192	Chst15	ENSMUSG00000030930	77590	carbohydrate (N-acetylgalactosamine 4-sulfate 6-O) sulfotransferase 15
Il15	-5.765445316	1.95E-12	1.26E-10	949	980	771	10	15	21	3.666970963	3.699820711	3.624003185	-2.117846781	-2.103394675	-2.084299634	Il15	ENSMUSG00000031712	16168	interleukin 15
Rln1	-5.748257961	5.02E-06	1.39E-05	166	165	109	1	0	9	1.159333203	1.137270663	0.811656232	-4.803165618	-6.138067722	-3.195280444	Rln1	ENSMUSG00000039097	19773	relaxin 1
Glyat	-5.692608259	2.29E-13	3.24E-11	2278	2308	1724	28	42	44	4.929317529	4.934702933	4.784041455	-0.690741717	-0.675696506	-1.063324636	Glyat	ENSMUSG00000063683	107146	glycine-N-acyltransferase
Fez1	-5.690348658	9.86E-13	8.74E-11	1282	1364	1161	18	22	28	4.100468263	4.176366828	4.21401016	-1.309918261	-1.579137762	-1.691144701	Fez1	ENSMUSG00000032118	235180	fasciculation and elongation protein zeta 1 (zygin I)
Ret	-5.682429444	4.26E-14	1.35E-11	5222	4794	4289	56	108	108	6.125773171	5.988942247	6.098478273	0.292630423	0.666737052	0.206537884	Ret	ENSMUSG00000030110	19713	ret proto-oncogene
Serpinb5	-5.658736722	4.10E-10	6.21E-09	507	447	487	4	10	13	2.763953915	2.569192297	2.962162692	-3.31221402	-2.645001603	-2.723685638	Serpinb5	ENSMUSG00000067006	20724	serine (or cysteine) peptidase inhibitor, clade B, member 5
B3gnt8	-5.616800772	1.34E-09	1.51E-08	581	482	376	5	6	18	2.960122171	2.677699951	2.589749383	-3.031565593	-3.298979292	-2.292285925	B3gnt8	ENSMUSG00000059479	232984	UDP-GlcNAc:betaGal beta-1,3-N-acetylglucosaminyltransferase 8
Nid1	-5.603949795	4.70E-15	4.28E-12	5715	5535	4752	76	113	126	6.255898906	6.196252474	6.246342664	0.728795221	0.731457426	0.426392012	Nid1	ENSMUSG00000005397	18073	nidogen 1
5830432E09Rik	-5.602280061	5.42E-06	1.49E-05	76	69	75	0	1	1	0.043041535	-0.107628017	0.277571665	-6.138067722	-5.119471787	-5.336315493	5830432E09Rik	ENSMUSG00000097471	67765	RIKEN cDNA 5830432E09 gene
Shisa6	-5.597271554	2.50E-07	1.04E-06	205	185	202	4	1	5	1.462028003	1.301322771	1.696300188	-3.31221402	-5.119471787	-3.900477895	Shisa6	ENSMUSG00000053930	380702	shisa family member 6
Heph	-5.588458474	2.91E-08	1.73E-07	600	712	487	17	7	10	3.006463148	3.239509457	2.962162692	-1.389396011	-3.105680466	-3.06216365	Heph	ENSMUSG00000031209	15203	hephaestin
Wnt4	-5.578403679	7.90E-15	5.27E-12	7834	7432	6597	88	173	193	6.710822029	6.62134835	6.719542466	0.938612792	1.341621291	1.036267727	Wnt4	ENSMUSG00000036856	22417	wingless-type MMTV integration site family, member 4
Nfia	-5.577222752	2.44E-11	7.46E-10	792	701	550	8	15	16	3.406382968	3.217080694	3.137371407	-2.417716017	-2.103394675	-2.449722497	Nfia	ENSMUSG00000028565	18027	nuclear factor I/A
Rgs17	-5.555200146	2.67E-09	2.61E-08	727	773	629	11	21	10	3.283010629	3.357929464	3.330707384	-1.988449026	-1.643340287	-3.06216365	Rgs17	ENSMUSG00000019775	56533	regulator of G-protein signaling 17
Elavl2	-5.552962642	3.18E-08	1.85E-07	206	240	139	2	4	3	1.469012335	1.674925861	1.15989191	-4.121868359	-3.786500108	-4.446689355	Elavl2	ENSMUSG00000008489	15569	ELAV (embryonic lethal, abnormal vision, Drosophila)-like 2 (Hu antigen B)
Cend1	-5.546845883	1.70E-07	7.47E-07	142	137	133	1	3	2	0.935590163	0.87088262	1.096646803	-4.803165618	-4.11026294	-4.823989504	Cend1	ENSMUSG00000060240	57754	cell cycle exit and neuronal differentiation 1
Ppp1r3b	-5.541394351	5.42E-07	1.99E-06	195	211	184	2	1	11	1.390259481	1.490015933	1.5622689	-4.121868359	-5.119471787	-2.940298592	Ppp1r3b	ENSMUSG00000046794	244416	protein phosphatase 1, regulatory (inhibitor) subunit 3B
Foxa1	-5.507964522	5.70E-06	1.55E-05	120	84	75	2	1	0	0.694695813	0.172218221	0.277571665	-4.121868359	-5.119471787	-6.138067722	Foxa1	ENSMUSG00000035451	15375	forkhead box A1
Tmem255a	-5.486911405	1.75E-12	1.21E-10	1275	1249	1081	14	28	37	4.092575804	4.049400974	4.111090395	-1.658050119	-1.24439019	-1.305226731	Tmem255a	ENSMUSG00000036502	245386	transmembrane protein 255A
Ston2	-5.457336966	1.77E-06	5.55E-06	339	356	311	12	8	2	2.184747211	2.241676743	2.316642327	-1.869707915	-2.935247198	-4.823989504	Ston2	ENSMUSG00000020961	108800	stonin 2
D330045A20Rik	-5.451506921	1.74E-08	1.16E-07	288	320	207	2	5	11	1.950328405	2.088358598	1.73142297	-4.121868359	-3.522243839	-2.940298592	D330045A20Rik	ENSMUSG00000042498	102871	RIKEN cDNA D330045A20 gene
Gpc6	-5.437785456	1.45E-05	3.54E-05	378	430	280	13	14	1	2.341383229	2.51339058	2.16560976	-1.760000954	-2.196656353	-5.336315493	Gpc6	ENSMUSG00000058571	23888	glypican 6
S100a14	-5.430586312	9.50E-05	0.00019148	112	117	73	0	0	15	0.59606388	0.645128747	0.23904046	-6.138067722	-6.138067722	-2.535390406	S100a11	ENSMUSG00000027907	20195	S100 calcium binding protein A11
Evpl	-5.410804696	1.85E-12	1.23E-10	7251	6422	5619	121	106	221	6.599268598	6.410653236	6.488079593	1.395126654	0.640013455	1.230447229	Evpl	ENSMUSG00000034282	14027	envoplakin
Wasf3	-5.402739555	5.74E-07	2.10E-06	119	136	133	2	3	1	0.682729332	0.860395739	1.096646803	-4.121868359	-4.11026294	-5.336315493	Wasf3	ENSMUSG00000029636	245880	WAS protein family, member 3
Mfap2	-5.397100448	1.22E-07	5.68E-07	208	172	147	3	4	2	1.482880373	1.196834145	1.240124162	-3.660973051	-3.786500108	-4.823989504	Mfap2	ENSMUSG00000060572	17150	microfibrillar-associated protein 2
Cd55	-5.394481333	4.15E-07	1.58E-06	156	166	91	1	4	2	1.070283784	1.145931778	0.553573205	-4.803165618	-3.786500108	-4.823989504	Cd55	ENSMUSG00000026399	13136	CD55 molecule, decay accelerating factor for complement
Pdzrn3	-5.383565961	3.07E-09	2.93E-08	1003	911	668	23	12	22	3.746725747	3.594609411	3.417376593	-0.967364529	-2.403482126	-2.021139478	Pdzrn3	ENSMUSG00000035357	55983	PDZ domain containing RING finger 3
Fetub	-5.367281417	5.36E-09	4.56E-08	280	302	176	3	5	7	1.909837858	2.005122318	1.498453825	-3.660973051	-3.522243839	-3.505213359	Fetub	ENSMUSG00000022871	59083	fetuin beta
Chrm1	-5.363207088	1.78E-09	1.90E-08	408	363	304	6	9	7	2.451268904	2.269685524	2.283893752	-2.796722105	-2.78283762	-3.505213359	Chrm1	ENSMUSG00000032773	12669	cholinergic receptor, muscarinic 1, CNS
Gm11549	-5.356175496	4.63E-08	2.53E-07	350	376	284	7	3	14	2.230675247	2.320301756	2.186009554	-2.594808743	-4.11026294	-2.62646825	Gm11549	ENSMUSG00000085007	100503068	predicted gene 11549
Kcnt2	-5.349224936	8.39E-08	4.15E-07	307	250	186	4	8	3	2.042170162	1.733562908	1.577791167	-3.31221402	-2.935247198	-4.446689355	Kcnt2	ENSMUSG00000052726	240776	potassium channel, subfamily T, member 2
Rab15	-5.342454655	8.41E-11	1.84E-09	1126	1185	1124	12	31	46	3.913444264	3.973581374	4.167320558	-1.869707915	-1.102253137	-1.001056717	Rab15	ENSMUSG00000021062	104886	RAB15, member RAS oncogene family
Wnt3	-5.340938501	8.81E-09	6.68E-08	661	701	604	5	17	34	3.145915652	3.217080694	3.272280187	-3.031565593	-1.933215921	-1.422757456	Wnt3	ENSMUSG00000000125	22415	wingless-type MMTV integration site family, member 3
Bnc1	-5.339215586	9.18E-10	1.12E-08	383	392	271	5	6	12	2.360288617	2.380255327	2.118627408	-3.031565593	-3.298979292	-2.827930519	Bnc1	ENSMUSG00000025105	12173	basonuclin 1
Sp8	-5.312775767	1.09E-05	2.74E-05	110	111	79	1	0	7	0.570315048	0.569887759	0.351677797	-4.803165618	-6.138067722	-3.505213359	Sp8	ENSMUSG00000048562	320145	trans-acting transcription factor 8
Ptn	-5.308812327	1.28E-08	9.05E-08	367	378	295	3	7	18	2.298898205	2.327933627	2.240665708	-3.660973051	-3.105680466	-2.292285925	Ptn	ENSMUSG00000029838	19242	pleiotrophin
Pcdh1	-5.307719552	4.73E-05	0.000101877	225	207	206	0	9	19	1.595667999	1.462544618	1.724466486	-6.138067722	-2.78283762	-2.219574213	Pcdh1	ENSMUSG00000051375	75599	protocadherin 1
Slc34a3	-5.279340065	1.52E-07	6.84E-07	194	143	180	2	2	8	1.382882292	0.932251811	1.530714177	-4.121868359	-4.528363528	-3.34194003	Slc34a3	ENSMUSG00000006469	142681	solute carrier family 34 (sodium phosphate), member 3
Acer2	-5.251066832	1.38E-12	1.07E-10	1356	1281	1206	19	37	42	4.181364009	4.085867067	4.268830908	-1.234591254	-0.854145463	-1.128401796	Acer2	ENSMUSG00000038007	230379	alkaline ceramidase 2
Zfp641	-5.239113691	1.27E-05	3.14E-05	109	146	94	4	0	4	0.557266221	0.961984437	0.599921914	-3.31221402	-6.138067722	-4.147886761	Zfp641	ENSMUSG00000022987	239652	zinc finger protein 641
Prr16	-5.218145769	1.26E-06	4.14E-06	79	110	96	1	1	3	0.098139533	0.556957056	0.630013959	-4.803165618	-5.119471787	-4.446689355	Prr16	ENSMUSG00000073565	71373	proline rich 16
Necab1	-5.217310717	5.94E-08	3.11E-07	302	209	147	2	7	6	2.018562399	1.476345662	1.240124162	-4.121868359	-3.105680466	-3.689351105	Necab1	ENSMUSG00000040536	69352	N-terminal EF-hand calcium binding protein 1
Wnt10b	-5.21295611	6.27E-12	2.80E-10	884	1063	856	17	20	35	3.564727824	3.816985559	3.774718127	-1.389396011	-1.71053355	-1.382507256	Wnt10b	ENSMUSG00000022996	22410	wingless-type MMTV integration site family, member 10B
Phf24	-5.202022552	5.97E-05	0.000125813	121	120	123	1	0	18	0.706563853	0.681327118	0.984657422	-4.803165618	-6.138067722	-2.292285925	Phf24	ENSMUSG00000036062	230085	PHD finger protein 24
Ephb6	-5.196797791	1.45E-06	4.66E-06	617	457	485	24	4	18	3.046700899	2.6010361	2.956236506	-0.907633835	-3.786500108	-2.292285925	Ephb6	ENSMUSG00000029869	13848	Eph receptor B6
Nrg2	-5.184272189	9.41E-08	4.56E-07	389	280	319	3	6	23	2.382652844	1.896401494	2.353181045	-3.660973051	-3.298979292	-1.96062884	Nrg2	ENSMUSG00000060275	100042150	neuregulin 2
Spin2c	-5.182321928	4.66E-06	1.30E-05	87	56	85	1	1	1	0.23554142	-0.403682894	0.45615436	-4.803165618	-5.119471787	-5.336315493	Spin2c	ENSMUSG00000046550	278240	spindlin family, member 2C
Mef2c	-5.180378865	2.17E-10	3.81E-09	404	436	370	7	9	14	2.43709213	2.533332681	2.566597171	-2.594808743	-2.78283762	-2.62646825	Mef2c	ENSMUSG00000005583	17260	myocyte enhancer factor 2C
Unc45b	-5.17927829	4.29E-10	6.39E-09	510	454	468	6	15	17	2.772447675	2.591556542	2.904856164	-2.796722105	-2.103394675	-2.368857708	Unc45b	ENSMUSG00000018845	217012	unc-45 myosin chaperone B
Cthrc1	-5.1521521	1.36E-05	3.34E-05	120	241	108	8	2	1	0.694695813	1.680897981	0.798467468	-2.417716017	-4.528363528	-5.336315493	Cthrc1	ENSMUSG00000054196	68588	collagen triple helix repeat containing 1
Flt4	-5.137060523	9.13E-10	1.12E-08	454	426	390	6	9	21	2.605012484	2.499941038	2.642368687	-2.796722105	-2.78283762	-2.084299634	Flt4	ENSMUSG00000020357	14257	FMS-like tyrosine kinase 4
Hpse	-5.120489442	2.58E-10	4.40E-09	828	926	781	10	28	38	3.470429302	3.618143083	3.642573599	-2.117846781	-1.24439019	-1.268085372	Hpse	ENSMUSG00000035273	15442	heparanase
Ltb4r1	-5.102787286	2.76E-07	1.12E-06	329	312	256	2	16	11	2.141686465	2.051956229	2.036754725	-4.121868359	-2.015797488	-2.940298592	Ltb4r1	ENSMUSG00000046908	16995	leukotriene B4 receptor 1
Gm11538	-5.101842496	2.83E-05	6.42E-05	81	88	49	0	4	1	0.133736175	0.238505826	-0.327597836	-6.138067722	-3.786500108	-5.336315493	Gm11538	NA	432593	predicted gene 11538
Tdrkh	-5.099615729	2.01E-07	8.66E-07	545	620	520	8	37	10	2.868014108	3.040222234	3.056585715	-2.417716017	-0.854145463	-3.06216365	Tdrkh	ENSMUSG00000041912	72634	tudor and KH domain containing protein
Dtna	-5.095613536	6.60E-11	1.56E-09	629	694	606	14	18	19	3.074443131	3.202624132	3.277042434	-1.658050119	-1.855106578	-2.219574213	Dtna	ENSMUSG00000024302	13527	dystrobrevin alpha
9930014A18Rik	-5.089848404	2.76E-05	6.29E-05	139	132	79	2	8	0	0.90501525	0.817668888	0.351677797	-4.121868359	-2.935247198	-6.138067722	9930014A18Rik	NA	320469	RIKEN cDNA 9930014A18 gene
Lce1f	-5.076456094	1.95E-06	6.05E-06	89	80	87	1	1	3	0.267940311	0.102737597	0.489363616	-4.803165618	-5.119471787	-4.446689355	Lce1f	ENSMUSG00000042124	67828	late cornified envelope 1F
Cpne7	-5.05515474	4.01E-08	2.25E-07	207	201	213	3	8	5	1.475963018	1.420331214	1.772471845	-3.660973051	-2.935247198	-3.900477895	Cpne7	ENSMUSG00000034796	102278	copine VII
Mpped2	-5.041393455	2.35E-06	7.11E-06	91	125	86	1	1	6	0.299627566	0.73970975	0.472854541	-4.803165618	-5.119471787	-3.689351105	Mpped2	ENSMUSG00000016386	77015	metallophosphoesterase domain containing 2
Slc22a18	-5.033304529	5.76E-11	1.42E-09	572	520	514	11	14	20	2.937640573	2.786944447	3.039871191	-1.988449026	-2.196656353	-2.150351998	Slc22a18	ENSMUSG00000000154	18400	solute carrier family 22 (organic cation transporter), member 18
Apbb1ip	-5.03252447	3.05E-06	8.94E-06	144	98	68	1	1	6	0.955619287	0.392011188	0.137954426	-4.803165618	-5.119471787	-3.689351105	Apbb1ip	ENSMUSG00000026786	54519	amyloid beta (A4) precursor protein-binding, family B, member 1 interacting protein
Fcho1	-5.027343915	4.84E-08	2.62E-07	232	197	152	2	6	8	1.639663286	1.391486739	1.288094041	-4.121868359	-3.298979292	-3.34194003	Fcho1	ENSMUSG00000070000	74015	FCH domain only 1
2410124H12Rik	-5.02595307	3.93E-05	8.63E-05	76	125	100	0	2	11	0.043041535	0.73970975	0.688378084	-6.138067722	-4.528363528	-2.940298592	2410124H12Rik	NA	76785	RIKEN cDNA 2410124H12 gene
Guca1a	-5.015201211	5.17E-06	1.43E-05	94	77	65	2	1	1	0.345890516	0.048339103	0.073718376	-4.121868359	-5.119471787	-5.336315493	Guca1a	ENSMUSG00000023982	14913	guanylate cyclase activator 1a (retina)
Vcan	-5.005771028	3.12E-15	4.28E-12	35489	33305	26198	733	923	1171	8.890220522	8.785103077	8.708971696	3.987415243	3.750597053	3.628969914	Vcan	ENSMUSG00000021614	13003	versican
Scrn1	-4.983006951	6.30E-08	3.26E-07	433	444	429	18	8	12	2.536850499	2.559500464	2.779573911	-1.309918261	-2.935247198	-2.827930519	Scrn1	ENSMUSG00000019124	69938	secernin 1
Rnf130	-4.959318622	2.63E-10	4.45E-09	538	461	497	12	12	20	2.849400559	2.613579389	2.99143388	-1.869707915	-2.403482126	-2.150351998	Rnf130	ENSMUSG00000020376	59044	ring finger protein 130
Ldhb	-4.942256128	2.74E-14	9.39E-12	5614	6002	4932	101	200	237	6.230179294	6.313090739	6.29997078	1.136016364	1.549757657	1.330698409	Ldhb	ENSMUSG00000030246	16832	lactate dehydrogenase B
Cpq	-4.940348469	2.08E-09	2.14E-08	1302	1142	1012	25	56	29	4.122783105	3.920306063	4.016013984	-0.850278119	-0.268862733	-1.642801402	Cpq	ENSMUSG00000039007	54381	carboxypeptidase Q
Nrap	-4.939291111	1.44E-10	2.83E-09	859	840	694	23	19	30	3.523389969	3.477691005	3.47239232	-0.967364529	-1.781009857	-1.596025654	Nrap	ENSMUSG00000049134	18175	nebulin-related anchoring protein
Thbd	-4.938345643	1.61E-06	5.13E-06	269	231	181	12	4	4	1.852240109	1.620034239	1.538667796	-1.869707915	-3.786500108	-4.147886761	Thbd	ENSMUSG00000074743	21824	thrombomodulin
Lipn	-4.935455528	1.04E-06	3.52E-06	168	191	159	1	6	12	1.176502007	1.347109011	1.352680136	-4.803165618	-3.298979292	-2.827930519	Lipn	ENSMUSG00000024770	70166	lipase, family member N
Vill	-4.921812107	1.53E-12	1.11E-10	1750	1646	1476	28	57	77	4.549107531	4.4472934	4.560099324	-0.690741717	-0.243760711	-0.274433638	Vill	ENSMUSG00000038775	22351	villin-like
Ndufa4l2	-4.903717017	3.12E-10	5.05E-09	870	887	858	27	25	28	3.541724714	3.556138342	3.77808149	-0.741985034	-1.40207677	-1.691144701	Ndufa4l2	ENSMUSG00000040280	407790	NADH dehydrogenase (ubiquinone) 1 alpha subcomplex, 4-like 2
Cdh10	-4.901303943	5.15E-08	2.76E-07	248	273	203	4	12	6	1.735454395	1.8600167	1.703393483	-3.31221402	-2.403482126	-3.689351105	Cdh10	ENSMUSG00000022321	320873	cadherin 10
Cyp2f2	-4.88353916	5.69E-05	0.000120421	112	137	105	3	0	14	0.59606388	0.87088262	0.758161957	-3.660973051	-6.138067722	-2.62646825	Cyp2f2	ENSMUSG00000052974	13107	cytochrome P450, family 2, subfamily f, polypeptide 2
Nrk	-4.878364076	5.65E-07	2.07E-06	186	187	185	2	12	5	1.322466069	1.316746871	1.570050909	-4.121868359	-2.403482126	-3.900477895	Nrk	ENSMUSG00000052854	27206	Nik related kinase
Slc13a5	-4.870498063	2.15E-08	1.36E-07	413	316	324	4	16	17	2.468796186	2.070272224	2.375556563	-3.31221402	-2.015797488	-2.368857708	Slc13a5	ENSMUSG00000020805	237831	solute carrier family 13 (sodium-dependent citrate transporter), member 5
Plek2	-4.86467166	9.28E-13	8.34E-11	2683	2709	2534	71	72	120	5.16529535	5.165720953	5.339460517	0.631485036	0.088212164	0.356764641	Plek2	ENSMUSG00000021118	27260	pleckstrin 2
Reep2	-4.861520689	2.68E-12	1.56E-10	1061	937	951	22	31	44	3.827745375	3.635160352	3.926403154	-1.029675411	-1.102253137	-1.063324636	Reep2	ENSMUSG00000038555	225362	receptor accessory protein 2
Igsf11	-4.861509059	2.29E-06	6.97E-06	180	212	182	6	10	2	1.275433357	1.496802799	1.546577808	-2.796722105	-2.645001603	-4.823989504	Igsf11	ENSMUSG00000022790	207683	immunoglobulin superfamily, member 11
Dsp	-4.851948377	3.59E-09	3.33E-08	1014	1001	939	12	44	58	3.762445239	3.730375959	3.908100188	-1.869707915	-0.610070431	-0.6751454	Dsp	ENSMUSG00000054889	109620	desmoplakin
Lonrf3	-4.846368527	6.86E-06	1.83E-05	168	168	122	8	1	6	1.176502007	1.163099563	0.972965103	-2.417716017	-5.119471787	-3.689351105	Lonrf3	ENSMUSG00000016239	74365	LON peptidase N-terminal domain and ring finger 3
Cutal	-4.845157666	1.62E-09	1.75E-08	638	722	602	19	13	35	3.094905232	3.259601012	3.267502169	-1.234591254	-2.296366073	-1.382507256	Cutal	ENSMUSG00000026870	77996	cutA divalent cation tolerance homolog-like
Mmp16	-4.843524546	3.99E-07	1.53E-06	484	504	458	21	19	8	2.69711852	2.74195078	2.873754951	-1.094799501	-1.781009857	-3.34194003	Mmp16	ENSMUSG00000028226	17389	matrix metallopeptidase 16
Sncg	-4.838452289	2.35E-06	7.13E-06	130	118	102	4	1	5	0.809199138	0.657296067	0.716697962	-3.31221402	-5.119471787	-3.900477895	Sncg	ENSMUSG00000023064	20618	synuclein, gamma
Cdkl1	-4.838426271	1.11E-06	3.72E-06	133	115	73	1	3	5	0.841850037	0.620481865	0.23904046	-4.803165618	-4.11026294	-3.900477895	Cdkl1	ENSMUSG00000020990	71091	cyclin-dependent kinase-like 1 (CDC2-related kinase)
Mogat2	-4.83229807	1.54E-10	2.96E-09	522	492	545	10	19	23	2.805931312	2.707260046	3.124217376	-2.117846781	-1.781009857	-1.96062884	Mogat2	ENSMUSG00000052396	233549	monoacylglycerol O-acyltransferase 2
Parm1	-4.823590398	1.64E-06	5.20E-06	206	206	245	8	2	14	1.469012335	1.45559427	1.973616794	-2.417716017	-4.528363528	-2.62646825	Parm1	ENSMUSG00000034981	231440	prostate androgen-regulated mucin-like protein 1
Apol10b	-4.822367849	6.89E-09	5.54E-08	359	404	312	12	10	11	2.267194749	2.423640091	2.321260597	-1.869707915	-2.645001603	-2.940298592	Apol10b	ENSMUSG00000050014	328561	apolipoprotein L 10B
Tert	-4.81178009	2.91E-06	8.58E-06	136	178	142	1	4	15	0.87377831	1.246001573	1.190504255	-4.803165618	-3.786500108	-2.535390406	Tert	ENSMUSG00000021611	21752	telomerase reverse transcriptase
Ociad2	-4.796582977	7.25E-08	3.66E-07	196	258	176	5	9	5	1.397599139	1.77881486	1.498453825	-3.031565593	-2.78283762	-3.900477895	Ociad2	ENSMUSG00000029153	433904	OCIA domain containing 2
Pm20d1	-4.788785825	1.68E-07	7.39E-07	291	298	186	8	11	5	1.9652241	1.985954595	1.577791167	-2.417716017	-2.519193702	-3.900477895	Pm20d1	ENSMUSG00000042251	212933	peptidase M20 domain containing 1
Cnn1	-4.783746679	5.85E-07	2.13E-06	756	759	727	24	9	68	3.339360769	3.331597788	3.539328243	-0.907633835	-2.78283762	-0.45048178	Cnn1	ENSMUSG00000001349	12797	calponin 1
Rgs14	-4.772736135	8.46E-09	6.48E-08	467	436	475	16	16	13	2.645649005	2.533332681	2.926234839	-1.473508754	-2.015797488	-2.723685638	Rgs16	ENSMUSG00000026475	19734	regulator of G-protein signaling 16
St3gal6	-4.758200689	3.00E-07	1.21E-06	179	213	181	3	12	5	1.267443312	1.503557886	1.538667796	-3.660973051	-2.403482126	-3.900477895	St3gal6	ENSMUSG00000022747	54613	ST3 beta-galactoside alpha-2,3-sialyltransferase 6
Ush1c	-4.742839079	2.74E-08	1.65E-07	199	213	158	3	7	9	1.419396697	1.503557886	1.343628695	-3.660973051	-3.105680466	-3.195280444	Ush1c	ENSMUSG00000030838	72088	USH1 protein network component harmonin
Pga5	-4.741345603	3.62E-08	2.06E-07	484	398	370	15	17	10	2.69711852	2.402110787	2.566597171	-1.56283076	-1.933215921	-3.06216365	Pga5	ENSMUSG00000024738	58803	pepsinogen 5, group I
Ttbk1	-4.740051384	9.10E-10	1.12E-08	334	321	302	7	10	16	2.163377489	2.092844984	2.274398834	-2.594808743	-2.645001603	-2.449722497	Ttbk1	ENSMUSG00000015599	106763	tau tubulin kinase 1
Matn4	-4.735804315	2.94E-13	3.87E-11	5817	5242	4620	157	165	241	6.281416012	6.117802126	6.205708389	1.769097148	1.273707119	1.354709315	Matn4	ENSMUSG00000016995	17183	matrilin 4
Hspa12a	-4.731802766	1.41E-07	6.42E-07	165	227	151	3	4	13	1.15067157	1.594951112	1.278626818	-3.660973051	-3.786500108	-2.723685638	Hspa12a	ENSMUSG00000025092	73442	heat shock protein 12A
Aldh1a1	-4.729839837	7.63E-05	0.000156824	121	117	77	3	0	13	0.706563853	0.645128747	0.3151005	-3.660973051	-6.138067722	-2.723685638	Aldh1a1	ENSMUSG00000053279	11668	aldehyde dehydrogenase family 1, subfamily A1
Ascl2	-4.717090793	1.16E-06	3.84E-06	197	150	151	4	2	14	1.404901646	1.000698117	1.278626818	-3.31221402	-4.528363528	-2.62646825	Ascl2	ENSMUSG00000009248	17173	achaete-scute family bHLH transcription factor 2
Dkkl1	-4.706342138	9.03E-05	0.000182983	91	104	85	2	0	14	0.299627566	0.476840158	0.45615436	-4.121868359	-6.138067722	-2.62646825	Dkkl1	ENSMUSG00000030792	50722	dickkopf-like 1
Mtcl1	-4.691512941	2.51E-11	7.59E-10	1223	1169	949	36	34	51	4.032554013	3.953987092	3.923368739	-0.335538148	-0.972872316	-0.856218514	Mtcl1	ENSMUSG00000052105	68617	microtubule crosslinking factor 1
Clec4g	-4.67869432	2.27E-06	6.90E-06	132	106	85	2	6	2	0.831048302	0.504043144	0.45615436	-4.121868359	-3.298979292	-4.823989504	Clec4g	ENSMUSG00000074491	75863	C-type lectin domain family 4, member g
Cma1	-4.67858417	1.21E-05	3.01E-05	56	80	65	1	3	1	-0.390447513	0.102737597	0.073718376	-4.803165618	-4.11026294	-5.336315493	Cma1	ENSMUSG00000022225	17228	chymase 1, mast cell
Ptges	-4.678245325	1.26E-16	1.59E-12	10845	10718	9710	264	410	525	7.179976754	7.149497871	7.277141338	2.516432553	2.581793307	2.473654129	Ptges3	ENSMUSG00000071072	56351	prostaglandin E synthase 3 (cytosolic)
Col2a1	-4.676407014	2.98E-12	1.69E-10	3778	3579	3068	111	132	141	5.658905534	5.567378373	5.615254413	1.271380784	0.953895578	0.587040915	Col2a1	ENSMUSG00000022483	12824	collagen, type II, alpha 1
Pgm5	-4.670941384	1.75E-06	5.50E-06	211	129	149	7	2	8	1.503435637	0.784772282	1.259503931	-2.594808743	-4.528363528	-3.34194003	Pgm5	ENSMUSG00000041731	226041	phosphoglucomutase 5
Cntfr	-4.669475731	1.55E-07	6.98E-07	254	211	194	5	4	18	1.769797444	1.490015933	1.638262189	-3.031565593	-3.786500108	-2.292285925	Cntfr	ENSMUSG00000028444	12804	ciliary neurotrophic factor receptor
Serpina3n	-4.659620671	6.85E-09	5.52E-08	265	243	283	5	11	13	1.830711931	1.692768563	2.180936584	-3.031565593	-2.519193702	-2.723685638	Serpina3n	ENSMUSG00000021091	20716	serine (or cysteine) peptidase inhibitor, clade A, member 3N
Ces2g	-4.65919051	3.80E-09	3.48E-08	1525	1511	1224	22	90	71	4.350690946	4.323916617	4.290188932	-1.029675411	0.406281139	-0.389380765	Ces2g	ENSMUSG00000031877	72361	carboxylesterase 2G
Ndst3	-4.656788974	1.40E-06	4.54E-06	176	122	125	6	2	6	1.243204191	0.704964432	1.007761561	-2.796722105	-4.528363528	-3.689351105	Ndst3	ENSMUSG00000027977	83398	N-deacetylase/N-sulfotransferase (heparan glucosaminyl) 3
Hes2	-4.652286763	7.75E-06	2.03E-05	158	184	163	1	6	21	1.088538823	1.293548439	1.388328485	-4.803165618	-3.298979292	-2.084299634	Hes2	ENSMUSG00000028940	15206	hairy and enhancer of split 2 (Drosophila)
Efs	-4.634357274	4.19E-07	1.60E-06	211	182	167	5	11	4	1.503435637	1.277872952	1.423117177	-3.031565593	-2.519193702	-4.147886761	Efs	ENSMUSG00000022203	13644	embryonal Fyn-associated substrate
H2-Eb1	-4.629933446	1.70E-09	1.83E-08	614	603	568	12	18	48	3.039681177	3.000182224	3.18375694	-1.869707915	-1.855106578	-0.941365503	H2-Eb1	ENSMUSG00000060586	14969	histocompatibility 2, class II antigen E beta
Dusp15	-4.628103737	2.52E-07	1.04E-06	415	397	359	4	20	33	2.475747907	2.398491125	2.523161692	-3.31221402	-1.71053355	-1.464162917	Dusp15	ENSMUSG00000042662	252864	dual specificity phosphatase-like 15
Cftr	-4.612683396	4.33E-11	1.14E-09	1577	1324	1190	47	41	71	4.399031256	4.133460535	4.249576862	0.043063281	-0.709664052	-0.389380765	Cftr	ENSMUSG00000041301	12638	cystic fibrosis transmembrane conductance regulator
Arhgap8	-4.608894981	1.30E-08	9.12E-08	214	245	199	6	6	12	1.523702143	1.70454227	1.674808616	-2.796722105	-3.298979292	-2.827930519	Arhgap8	ENSMUSG00000078954	73167	Rho GTPase activating protein 8
Npy1r	-4.608732011	0.000170301	0.00032503	82	111	67	0	12	3	0.15121046	0.569887759	0.11685861	-6.138067722	-2.403482126	-4.446689355	Npy1r	ENSMUSG00000036437	18166	neuropeptide Y receptor Y1
Calcrl	-4.608499766	7.10E-10	9.29E-09	719	690	502	12	23	47	3.267070451	3.19429773	3.005849736	-1.869707915	-1.517671049	-0.970902418	Calcrl	ENSMUSG00000059588	54598	calcitonin receptor-like
Slc7a3	-4.600096693	2.22E-12	1.39E-10	2564	2194	1913	50	84	148	5.099871051	4.861658036	4.934045094	0.131137182	0.307849125	0.656297796	Slc7a3	ENSMUSG00000031297	11989	solute carrier family 7 (cationic amino acid transporter, y+ system), member 3
Tenm3	-4.582964263	4.83E-10	6.97E-09	1220	1214	908	21	65	57	4.029013835	4.008431587	3.859713913	-1.094799501	-0.057271304	-0.699662648	Tenm3	ENSMUSG00000031561	23965	teneurin transmembrane protein 3
Vwde	-4.581316378	9.00E-05	0.000182509	86	52	86	4	3	0	0.21906498	-0.508515067	0.472854541	-3.31221402	-4.11026294	-6.138067722	Vwde	ENSMUSG00000079679	232585	von Willebrand factor D and EGF domains
Arhgap20	-4.569951368	2.51E-06	7.53E-06	94	145	104	1	5	8	0.345890516	0.952141489	0.744472611	-4.803165618	-3.522243839	-3.34194003	Arhgap20	ENSMUSG00000053199	244867	Rho GTPase activating protein 20
Fam159b	-4.566686757	3.59E-12	1.89E-10	953	1028	827	23	41	51	3.673032321	3.768733712	3.725047142	-0.967364529	-0.709664052	-0.856218514	Fam159b	ENSMUSG00000042655	77803	family with sequence similarity 159, member B
Trp53i11	-4.564688567	2.29E-12	1.42E-10	3272	2991	2886	106	113	148	5.45151828	5.308534664	5.527053584	1.205285605	0.731457426	0.656297796	Trp53i11	ENSMUSG00000068735	277414	transformation related protein 53 inducible protein 11
Sytl4	-4.545601295	0.000289131	0.000528953	139	171	111	10	0	16	0.90501525	1.188474163	0.837677475	-2.117846781	-6.138067722	-2.449722497	Sytl4	ENSMUSG00000031255	27359	synaptotagmin-like 4
Urah	-4.536391991	3.12E-06	9.15E-06	140	159	183	4	13	3	0.915279053	1.084182787	1.554444686	-3.31221402	-2.296366073	-4.446689355	Urah	ENSMUSG00000025481	76974	urate (5-hydroxyiso-) hydrolase
Tlr5	-4.532129951	1.70E-05	4.08E-05	79	108	87	5	3	1	0.098139533	0.530742677	0.489363616	-3.031565593	-4.11026294	-5.336315493	Tlr5	ENSMUSG00000079164	53791	toll-like receptor 5
Kcp	-4.529097478	5.37E-09	4.56E-08	574	431	338	17	17	17	2.942666846	2.516733465	2.436422483	-1.389396011	-1.933215921	-2.368857708	Kcp	ENSMUSG00000059022	333088	kielin/chordin-like protein
Adcyap1r1	-4.524095213	1.16E-07	5.44E-07	282	289	222	5	7	27	1.92006753	1.941872792	1.831934987	-3.031565593	-3.105680466	-1.741164269	Adcyap1r1	ENSMUSG00000029778	11517	adenylate cyclase activating polypeptide 1 receptor 1
Ankk1	-4.513923966	3.38E-09	3.16E-08	306	325	269	6	14	18	2.037479413	2.110652302	2.107975799	-2.796722105	-2.196656353	-2.292285925	Ankk1	ENSMUSG00000032257	244859	ankyrin repeat and kinase domain containing 1
Pcdh9	-4.492732388	2.01E-06	6.23E-06	173	98	110	3	8	3	1.218550853	0.392011188	0.824725519	-3.660973051	-2.935247198	-4.446689355	Pcdh9	ENSMUSG00000055421	211712	protocadherin 9
Lyn	-4.467747337	7.54E-07	2.66E-06	284	247	207	15	5	11	1.930225177	1.71622067	1.73142297	-1.56283076	-3.522243839	-2.940298592	Lyn	ENSMUSG00000042228	17096	LYN proto-oncogene, Src family tyrosine kinase
Mest	-4.467469315	2.67E-07	1.09E-06	570	570	467	7	46	32	2.932596726	2.91913436	2.901776041	-2.594808743	-0.547300154	-1.50679192	Mest	ENSMUSG00000051855	17294	mesoderm specific transcript
Pcdhgc5	-4.458948469	2.83E-09	2.73E-08	471	454	374	18	16	19	2.657925715	2.591556542	2.582073188	-1.309918261	-2.015797488	-2.219574213	Pcdhgc5	ENSMUSG00000102543	93708	protocadherin gamma subfamily C, 5
Pde1b	-4.458599422	3.64E-05	8.06E-05	207	246	133	1	9	32	1.475963018	1.710393287	1.096646803	-4.803165618	-2.78283762	-1.50679192	Pde1b	ENSMUSG00000022489	18574	phosphodiesterase 1B, Ca2+-calmodulin dependent
Liph	-4.443317703	1.22E-11	4.45E-10	1327	1318	1054	43	57	59	4.150199875	4.126913096	4.074629105	-0.083412475	-0.243760711	-0.651037847	Liph	ENSMUSG00000044626	239759	lipase, member H
Padi2	-4.441511324	4.13E-10	6.23E-09	520	435	485	13	18	34	2.800404395	2.530028081	2.956236506	-1.760000954	-1.855106578	-1.422757456	Padi2	ENSMUSG00000028927	18600	peptidyl arginine deiminase, type II
Aldh1l1	-4.432727421	4.35E-13	5.30E-11	3086	2817	2796	77	150	174	5.367111808	5.222098244	5.481360944	0.747493711	1.13705059	0.887844432	Aldh1l1	ENSMUSG00000030088	107747	aldehyde dehydrogenase 1 family, member L1
Rnf183	-4.426008349	1.62E-08	1.09E-07	230	233	258	5	12	15	1.627229508	1.632414137	2.047943279	-3.031565593	-2.403482126	-2.535390406	Rnf183	ENSMUSG00000063851	76072	ring finger protein 183
Slc37a1	-4.416968032	1.61E-07	7.16E-07	180	176	157	6	4	12	1.275433357	1.229797901	1.334520106	-2.796722105	-3.786500108	-2.827930519	Slc37a2	ENSMUSG00000032122	56857	solute carrier family 37 (glycerol-3-phosphate transporter), member 2
Chst10	-4.395087074	4.73E-08	2.58E-07	186	173	230	6	9	9	1.322466069	1.205145964	1.882809021	-2.796722105	-2.78283762	-3.195280444	Chst10	ENSMUSG00000026080	98388	carbohydrate sulfotransferase 10
Rasl10a	-4.380708434	4.01E-06	1.14E-05	142	154	139	8	2	10	0.935590163	1.038400035	1.15989191	-2.417716017	-4.528363528	-3.06216365	Rasl10a	ENSMUSG00000034209	75668	RAS-like, family 10, member A
Thy1	-4.367913606	1.04E-05	2.64E-05	194	174	129	2	21	6	1.382882292	1.213410169	1.052888607	-4.121868359	-1.643340287	-3.689351105	Thy1	ENSMUSG00000032011	21838	thymus cell antigen 1, theta
Lmcd1	-4.348737514	2.95E-10	4.84E-09	1012	922	924	29	61	46	3.75959986	3.611904877	3.884890033	-0.641256261	-0.147504793	-1.001056717	Lmcd1	ENSMUSG00000057604	30937	LIM and cysteine-rich domains 1
Slc2a4	-4.34595766	4.77E-10	6.91E-09	419	482	391	14	16	31	2.489551658	2.677699951	2.646054779	-1.658050119	-2.015797488	-1.550718985	Slc2a4	ENSMUSG00000018566	20528	solute carrier family 2 (facilitated glucose transporter), member 4
Sytl5	-4.336175085	4.72E-07	1.77E-06	134	142	121	6	4	6	0.852571498	0.922203189	0.96117725	-2.796722105	-3.786500108	-3.689351105	Sytl5	ENSMUSG00000054453	236643	synaptotagmin-like 5
Upk1b	-4.326277591	9.28E-09	6.97E-08	255	232	226	6	13	14	1.775442637	1.626237467	1.85759624	-2.796722105	-2.296366073	-2.62646825	Upk1b	ENSMUSG00000049436	22268	uroplakin 1B
Bmp7	-4.323551189	5.88E-06	1.60E-05	99	79	105	5	2	4	0.419844019	0.084831709	0.758161957	-3.031565593	-4.528363528	-4.147886761	Bmp7	ENSMUSG00000008999	12162	bone morphogenetic protein 7
Shtn1	-4.319921093	4.70E-07	1.76E-06	247	230	180	3	12	22	1.729650223	1.613804223	1.530714177	-3.660973051	-2.403482126	-2.021139478	Shtn1	ENSMUSG00000041362	71653	shootin 1
Cep126	-4.319269113	4.66E-05	0.000100601	176	252	151	1	14	28	1.243204191	1.745009657	1.278626818	-4.803165618	-2.196656353	-1.691144701	Cep126	ENSMUSG00000040729	234915	centrosomal protein 126
St6gal1	-4.317372061	8.77E-11	1.90E-09	2289	2190	2010	50	112	188	4.936264014	4.859026667	5.005371384	0.131137182	0.718743541	0.998665159	St6gal1	ENSMUSG00000022885	20440	beta galactoside alpha 2,6 sialyltransferase 1
Ankrd1	-4.310174302	2.10E-12	1.33E-10	7993	9163	7049	335	322	518	6.7398061	6.92337856	6.815138503	2.859296726	2.23416489	2.454338641	Ankrd1	ENSMUSG00000024803	107765	ankyrin repeat domain 1 (cardiac muscle)
Apod	-4.308091019	3.28E-08	1.90E-07	358	331	321	7	26	19	2.263182379	2.136957821	2.362172939	-2.594808743	-1.347576962	-2.219574213	Apod	ENSMUSG00000022548	11815	apolipoprotein D
Pla2g2f	-4.305714953	2.69E-05	6.14E-05	108	67	79	4	5	1	0.544098293	-0.149404584	0.351677797	-3.31221402	-3.522243839	-5.336315493	Pla2g2f	ENSMUSG00000028749	26971	phospholipase A2, group IIF
Ptgis	-4.305310711	8.33E-08	4.12E-07	243	249	191	4	12	20	1.706197165	1.727805294	1.615881531	-3.31221402	-2.403482126	-2.150351998	Ptgis	ENSMUSG00000017969	19223	prostaglandin I2 (prostacyclin) synthase
Ackr3	-4.299561601	4.47E-12	2.16E-10	1774	1886	1479	46	84	138	4.568746781	4.643539245	4.563026893	0.012468547	0.307849125	0.556310443	Ackr3	ENSMUSG00000044337	12778	atypical chemokine receptor 3
Unc93b1	-4.29137012	3.06E-08	1.80E-07	223	208	228	6	8	19	1.582847493	1.469461643	1.870257708	-2.796722105	-2.935247198	-2.219574213	Unc93b1	ENSMUSG00000036908	54445	unc-93 homolog B1 (C. elegans)
Rab37	-4.289110069	1.38E-06	4.47E-06	151	93	110	5	5	4	1.023609295	0.3172992	0.824725519	-3.031565593	-3.522243839	-4.147886761	Rab37	ENSMUSG00000020732	58222	RAB37, member RAS oncogene family
Scin	-4.286073814	0.000111191	0.000220762	55	79	82	1	10	1	-0.415954595	0.084831709	0.404861615	-4.803165618	-2.645001603	-5.336315493	Scin	ENSMUSG00000002565	20259	scinderin
Epha4	-4.283663776	1.16E-07	5.42E-07	341	339	302	12	25	11	2.193207251	2.171301964	2.274398834	-1.869707915	-1.40207677	-2.940298592	Epha4	ENSMUSG00000026235	13838	Eph receptor A4
Nova2	-4.272468556	7.64E-06	2.01E-05	127	107	80	5	6	2	0.775792142	0.517454675	0.369624462	-3.031565593	-3.298979292	-4.823989504	Nova2	ENSMUSG00000030411	384569	neuro-oncological ventral antigen 2
Dhh	-4.26827764	3.16E-08	1.84E-07	288	293	246	12	15	11	1.950328405	1.961631174	1.979472158	-1.869707915	-2.103394675	-2.940298592	Dhh	ENSMUSG00000023000	13363	desert hedgehog
Svop	-4.25969305	3.74E-12	1.91E-10	1992	1980	1920	68	116	113	4.735863951	4.71367109	4.939312088	0.569784016	0.76894034	0.271043624	Svop	ENSMUSG00000042078	68666	SV2 related protein
Fam84b	-4.249762398	3.75E-11	1.02E-09	950	952	885	32	56	52	3.668488692	3.6580469	3.822735741	-0.502235672	-0.268862733	-0.828917457	Fam84b	ENSMUSG00000072568	399603	family with sequence similarity 84, member B
Lppr5	-4.233556682	8.56E-07	2.97E-06	192	129	133	5	11	5	1.368013771	0.784772282	1.096646803	-3.031565593	-2.519193702	-3.900477895	Plppr5	ENSMUSG00000033342	75769	phospholipid phosphatase related 5
Nol4	-4.23288006	1.53E-08	1.04E-07	264	270	188	10	9	15	1.825279315	1.844137855	1.593148202	-2.117846781	-2.78283762	-2.535390406	Nol4	ENSMUSG00000041923	319211	nucleolar protein 4
Tubg2	-4.231709039	4.79E-07	1.79E-06	147	195	156	7	4	14	0.985151055	1.376845315	1.325353644	-2.594808743	-3.786500108	-2.62646825	Tubg2	ENSMUSG00000045007	103768	tubulin, gamma 2
Camsap3	-4.229798735	8.72E-09	6.63E-08	215	234	209	7	10	15	1.530394869	1.638564475	1.745236109	-2.594808743	-2.645001603	-2.535390406	Camsap3	ENSMUSG00000044433	69697	calmodulin regulated spectrin-associated protein family, member 3
Gpx6	-4.229280835	1.45E-06	4.66E-06	136	109	140	2	9	9	0.87377831	0.543909406	1.170168367	-4.121868359	-2.78283762	-3.195280444	Gpx6	ENSMUSG00000004341	75512	glutathione peroxidase 6
Fer1l4	-4.224992879	5.02E-09	4.33E-08	614	546	533	12	35	50	3.039681177	2.85719243	3.092149572	-1.869707915	-0.932201353	-0.884046189	Fer1l4	ENSMUSG00000013338	74562	fer-1-like 4 (C. elegans)
Kcnq5	-4.222820948	9.46E-07	3.24E-06	163	199	114	8	8	5	1.133190716	1.405981063	0.875849955	-2.417716017	-2.935247198	-3.900477895	Kcnq5	ENSMUSG00000028033	226922	potassium voltage-gated channel, subfamily Q, member 5
Tmem35	-4.222634169	0.000249981	0.000461663	69	89	73	0	8	9	-0.094345846	0.254612531	0.23904046	-6.138067722	-2.935247198	-3.195280444	Tmem35a	ENSMUSG00000033578	67564	transmembrane protein 35A
Map7d2	-4.220692104	2.80E-06	8.30E-06	274	277	157	11	4	26	1.878706294	1.880920236	1.334520106	-1.988449026	-3.786500108	-1.792980542	Map7d2	ENSMUSG00000041020	78283	MAP7 domain containing 2
Il21r	-4.215526112	0.000300849	0.000548963	96	99	58	5	9	0	0.375928336	0.40650027	-0.088321203	-3.031565593	-2.78283762	-6.138067722	Il21r	ENSMUSG00000030745	60504	interleukin 21 receptor
Ces2f	-4.20051904	5.06E-11	1.28E-09	712	667	487	22	33	40	3.252976842	3.145465298	2.962162692	-1.029675411	-1.014723174	-1.196553701	Ces2f	ENSMUSG00000062826	71903	carboxylesterase 2F
Aldh3a1	-4.186189931	2.69E-09	2.62E-08	331	357	381	13	21	20	2.150402049	2.245711444	2.608763061	-1.760000954	-1.643340287	-2.150351998	Aldh3a1	ENSMUSG00000019102	11670	aldehyde dehydrogenase family 3, subfamily A1
Ttc12	-4.183118688	1.32E-07	6.09E-07	142	149	120	4	6	10	0.935590163	0.991116653	0.949292287	-3.31221402	-3.298979292	-3.06216365	Ttc12	ENSMUSG00000040219	235330	tetratricopeptide repeat domain 12
Ank2	-4.179515296	9.46E-11	2.03E-09	1475	1306	1026	35	87	89	4.302630692	4.113728396	4.035818147	-0.375441787	0.357904445	-0.06883131	Ank2	ENSMUSG00000032826	109676	ankyrin 2, brain
Gm20744	-4.178684054	2.66E-06	7.93E-06	115	110	90	6	3	5	0.633845439	0.556957056	0.53778673	-2.796722105	-4.11026294	-3.900477895	Gm20744	ENSMUSG00000109145	434205	predicted gene, 20744
Sox2	-4.178664591	2.23E-07	9.43E-07	264	258	183	10	6	23	1.825279315	1.77881486	1.554444686	-2.117846781	-3.298979292	-1.96062884	Sox2	ENSMUSG00000074637	20674	SRY (sex determining region Y)-box 2
Spata25	-4.166123088	7.90E-10	1.00E-08	542	540	330	19	23	29	2.860066261	2.841282297	2.401957001	-1.234591254	-1.517671049	-1.642801402	Spata25	ENSMUSG00000017767	75642	spermatogenesis associated 25
H19	-4.160055045	7.23E-10	9.36E-09	816	869	665	25	32	82	3.449394865	3.526596487	3.410891481	-0.850278119	-1.057824439	-0.185179745	H19	ENSMUSG00000000031	14955	H19, imprinted maternally expressed transcript
3-Sep	-4.152391896	1.12E-09	1.32E-08	504	525	465	13	28	46	2.755409853	2.800721979	2.895595996	-1.760000954	-1.24439019	-1.001056717	3-Sep	ENSMUSG00000022456	24050	septin 3
Mab21l3	-4.143620403	2.68E-14	9.39E-12	6545	6938	5798	266	352	430	6.451504607	6.522132503	6.533314481	2.52729395	2.362308509	2.186487921	Mab21l3	ENSMUSG00000044313	242125	mab-21-like 3 (C. elegans)
Duoxa1	-4.143050378	4.13E-10	6.23E-09	742	742	644	33	28	55	3.312431907	3.298963708	3.364660631	-0.458721058	-1.24439019	-0.749983641	Duoxa1	ENSMUSG00000027224	213696	dual oxidase maturation factor 1
Slc7a10	-4.133435539	1.10E-05	2.78E-05	154	111	92	4	2	17	1.051794794	0.569887759	0.569188807	-3.31221402	-4.528363528	-2.368857708	Slc7a10	ENSMUSG00000030495	53896	solute carrier family 7 (cationic amino acid transporter, y+ system), member 10
Drc7	-4.131674463	1.60E-07	7.15E-07	175	135	126	6	6	9	1.235033132	0.84983207	1.019176345	-2.796722105	-3.298979292	-3.195280444	Drc7	ENSMUSG00000031786	330830	dynein regulatory complex subunit 7
Slc4a8	-4.124541846	2.72E-10	4.55E-09	1589	1703	1461	85	76	95	4.409960388	4.496376071	4.545371696	0.888949271	0.165200119	0.023933228	Slc4a8	ENSMUSG00000023032	59033	solute carrier family 4 (anion exchanger), member 8
Rab44	-4.1110748	3.07E-07	1.23E-06	892	821	674	61	40	31	3.577709639	3.444726453	3.430260013	0.414641363	-0.744450671	-1.550718985	Rab44	ENSMUSG00000064147	442827	RAB44, member RAS oncogene family
Glp1r	-4.109287961	1.07E-06	3.60E-06	111	88	102	3	4	8	0.583246908	0.238505826	0.716697962	-3.660973051	-3.786500108	-3.34194003	Glp1r	ENSMUSG00000024027	14652	glucagon-like peptide 1 receptor
Galnt6	-4.108413756	2.86E-11	8.40E-10	1045	1151	1028	34	57	101	3.80584575	3.931620667	4.038625251	-0.416480596	-0.243760711	0.111091707	Galnt6	ENSMUSG00000037280	207839	UDP-N-acetyl-alpha-D-galactosamine:polypeptide N-acetylgalactosaminyltransferase 6
Rbp1	-4.096025774	9.35E-12	3.69E-10	1348	1645	1213	47	94	100	4.172834028	4.446417219	4.277174419	0.043063281	0.468358994	0.096926068	Rbp1	ENSMUSG00000046402	19659	retinol binding protein 1, cellular
Prr15l	-4.095667798	1.15E-06	3.83E-06	305	315	353	24	8	25	2.032773363	2.065714979	2.498906601	-0.907633835	-2.935247198	-1.846727419	Prr15l	ENSMUSG00000047040	217138	proline rich 15-like
Cpz	-4.091579564	9.73E-10	1.18E-08	436	444	474	16	21	42	2.54678732	2.559500464	2.92320007	-1.473508754	-1.643340287	-1.128401796	Cpz	ENSMUSG00000036596	242939	carboxypeptidase Z
Smtnl1	-4.088341794	6.07E-08	3.16E-07	239	267	262	6	14	28	1.682356535	1.828082295	2.070063392	-2.796722105	-2.196656353	-1.691144701	Smtnl1	ENSMUSG00000027077	68678	smoothelin-like 1
Galnt18	-4.078528735	1.62E-05	3.89E-05	189	145	128	2	22	9	1.345419662	0.952141489	1.041738488	-4.121868359	-1.579137762	-3.195280444	Galnt18	ENSMUSG00000038296	233733	UDP-N-acetyl-alpha-D-galactosamine:polypeptide N-acetylgalactosaminyltransferase 18
Afap1l2	-4.075815825	5.43E-14	1.53E-11	3656	3541	2964	136	172	287	5.611562433	5.551983309	5.565516041	1.56286697	1.33330481	1.605442527	Afap1l2	ENSMUSG00000025083	226250	actin filament associated protein 1-like 2
Nfam1	-4.075333477	1.10E-06	3.69E-06	188	210	175	3	15	20	1.33780897	1.483196989	1.490274747	-3.660973051	-2.103394675	-2.150351998	Nfam1	ENSMUSG00000058099	74039	Nfat activating molecule with ITAM motif 1
Gal3st1	-4.072361387	5.50E-08	2.92E-07	239	277	236	9	9	28	1.682356535	1.880920236	1.919820795	-2.260004274	-2.78283762	-1.691144701	Gal3st1	ENSMUSG00000049721	53897	galactose-3-O-sulfotransferase 1
Kbtbd11	-4.072140239	3.22E-11	9.12E-10	903	929	739	34	56	55	3.595371016	3.622804099	3.562918633	-0.416480596	-0.268862733	-0.749983641	Kbtbd11	ENSMUSG00000055675	74901	kelch repeat and BTB (POZ) domain containing 11
Cdhr1	-4.069031926	6.79E-09	5.48E-08	277	246	229	8	16	18	1.894356047	1.710393287	1.876547014	-2.417716017	-2.015797488	-2.292285925	Cdhr1	ENSMUSG00000021803	170677	cadherin-related family member 1
Edaradd	-4.062083718	1.19E-06	3.94E-06	135	139	108	3	5	16	0.86321387	0.89163043	0.798467468	-3.660973051	-3.522243839	-2.449722497	Edaradd	ENSMUSG00000095105	171211	EDAR (ectodysplasin-A receptor)-associated death domain
Otog	-4.057381265	3.20E-10	5.13E-09	821	716	568	23	52	48	3.458196514	3.247579686	3.18375694	-0.967364529	-0.373880624	-0.941365503	Otog	ENSMUSG00000009487	18419	otogelin
Atp9a	-4.056407335	5.57E-10	7.73E-09	438	448	390	15	29	29	2.553374048	2.572408493	2.642368687	-1.56283076	-1.195438616	-1.642801402	Atp9a	ENSMUSG00000027546	11981	ATPase, class II, type 9A
Cyb561	-4.046253522	4.99E-10	7.13E-09	449	472	421	20	21	36	2.589073126	2.647521492	2.752473186	-1.163002877	-1.643340287	-1.343349597	Cyb561	ENSMUSG00000019590	13056	cytochrome b-561
Id4	-4.044515621	1.37E-07	6.26E-07	441	401	425	17	41	18	2.563198094	2.412915599	2.766087183	-1.389396011	-0.709664052	-2.292285925	Id4	ENSMUSG00000021379	15904	inhibitor of DNA binding 4
Esr2	-4.041696351	3.43E-09	3.20E-08	436	424	413	12	24	45	2.54678732	2.493168954	2.724853616	-1.869707915	-1.458716487	-1.031854761	Esr2	ENSMUSG00000021055	13983	estrogen receptor 2 (beta)
Smco3	-4.026569226	1.53E-05	3.71E-05	78	90	77	1	7	7	0.080006337	0.270541399	0.3151005	-4.803165618	-3.105680466	-3.505213359	Smco3	ENSMUSG00000043298	654818	single-pass membrane protein with coiled-coil domains 3
Rgs9	-4.023089393	0.000613429	0.001049356	99	84	69	0	10	15	0.419844019	0.172218221	0.158746208	-6.138067722	-2.645001603	-2.535390406	Rgs9	ENSMUSG00000020599	19739	regulator of G-protein signaling 9
Peg10	-4.015536595	8.26E-13	7.66E-11	5979	5666	4603	226	376	366	6.321037783	6.2299933	6.200391005	2.292819256	2.45721143	1.954781619	Peg10	ENSMUSG00000092035	170676	paternally expressed 10
Ncald	-4.014581508	2.62E-08	1.60E-07	520	523	467	34	22	31	2.800404395	2.795226745	2.901776041	-0.416480596	-1.579137762	-1.550718985	Ncald	ENSMUSG00000051359	52589	neurocalcin delta
Plxnb1	-4.009176466	3.57E-15	4.28E-12	4790	4403	3761	174	254	362	6.001222826	5.866227824	5.908995232	1.916832583	1.893097847	1.938986056	Plxnb1	ENSMUSG00000053646	235611	plexin B1
Slc5a4a	-4.005373458	3.93E-07	1.51E-06	125	166	140	6	10	7	0.75308316	1.145931778	1.170168367	-2.796722105	-2.645001603	-3.505213359	Slc5a4a	ENSMUSG00000020229	64452	solute carrier family 5, member 4a
Dusp2	-3.997516918	4.54E-10	6.66E-09	964	1014	936	51	42	85	3.689570928	3.74897185	3.903487934	0.159339525	-0.675696506	-0.134163061	Dusp2	ENSMUSG00000027368	13537	dual specificity phosphatase 2
Fgf1	-3.995784177	3.84E-06	1.10E-05	105	136	128	2	11	11	0.50385765	0.860395739	1.041738488	-4.121868359	-2.519193702	-2.940298592	Fgf1	ENSMUSG00000036585	14164	fibroblast growth factor 1
Ckmt1	-3.995736512	1.09E-11	4.10E-10	1675	1504	1541	74	98	109	4.485952884	4.317222284	4.622236835	0.690655108	0.527875527	0.219671831	Ckmt1	ENSMUSG00000000308	12716	creatine kinase, mitochondrial 1, ubiquitous
Has3	-3.985102671	1.06E-09	1.27E-08	903	930	696	47	36	70	3.595371016	3.62435443	3.47653866	0.043063281	-0.892645578	-0.409461609	Has3	ENSMUSG00000031910	15118	hyaluronan synthase 3
Adssl1	-3.977612751	3.25E-09	3.07E-08	533	549	382	23	20	48	2.835956582	2.86508218	2.61253591	-0.967364529	-1.71053355	-0.941365503	Adssl1	ENSMUSG00000011148	11565	adenylosuccinate synthetase like 1
Has1	-3.976369779	1.66E-08	1.11E-07	321	345	264	18	16	19	2.106287867	2.196533957	2.080997552	-1.309918261	-2.015797488	-2.219574213	Has1	ENSMUSG00000003665	15116	hyaluronan synthase 1
Tshr	-3.973385653	2.52E-07	1.04E-06	293	304	181	17	9	19	1.975069801	2.014611519	1.538667796	-1.389396011	-2.78283762	-2.219574213	Tshr	ENSMUSG00000020963	22095	thyroid stimulating hormone receptor
Ano2	-3.972249209	3.41E-06	9.87E-06	169	109	211	11	8	7	1.185010392	0.543909406	1.758918247	-1.988449026	-2.935247198	-3.505213359	Ano2	ENSMUSG00000038115	243634	anoctamin 2
Srgap1	-3.970864028	7.31E-11	1.65E-09	534	577	459	22	31	42	2.838655419	2.936710904	2.876895417	-1.029675411	-1.102253137	-1.128401796	Srgap1	ENSMUSG00000020121	117600	SLIT-ROBO Rho GTPase activating protein 1
Gsdmd	-3.962472673	2.56E-14	9.39E-12	2857	2979	2662	117	172	249	5.255914565	5.302736959	5.410530237	1.346894387	1.33330481	1.401564544	Gsdmd	ENSMUSG00000022575	69146	gasdermin D
Eif4g3	-3.961397399	1.84E-12	1.23E-10	1722	1531	1165	65	86	120	4.525851979	4.342873878	4.218968353	0.505325816	0.341411556	0.356764641	Eif4g3	ENSMUSG00000028760	230861	eukaryotic translation initiation factor 4 gamma, 3
Slco2a1	-3.9562779	1.55E-12	1.12E-10	2212	2195	1731	95	134	147	4.886921227	4.86231513	4.789884398	1.048249057	0.975432805	0.646605192	Slco2a1	ENSMUSG00000032548	24059	solute carrier organic anion transporter family, member 2a1
Ica1	-3.946797375	0.000152825	0.000295008	68	100	65	2	1	19	-0.115085891	0.420845284	0.073718376	-4.121868359	-5.119471787	-2.219574213	Ica1	ENSMUSG00000062995	15893	islet cell autoantigen 1
Vwa7	-3.937474605	9.06E-11	1.96E-09	1053	821	804	32	67	73	3.816837116	3.444726453	3.684399629	-0.502235672	-0.014186317	-0.350038627	Vwa7	ENSMUSG00000007030	27762	von Willebrand factor A domain containing 7
Des	-3.928756932	1.34E-13	2.47E-11	2721	3097	2618	124	163	259	5.18557728	5.358760444	5.386492857	1.430271282	1.256217011	1.458071491	Des	ENSMUSG00000026208	13346	desmin
Rasd2	-3.921301176	6.49E-09	5.29E-08	331	328	277	17	15	25	2.150402049	2.123865016	2.150118357	-1.389396011	-2.103394675	-1.846727419	Rasd2	ENSMUSG00000034472	75141	RASD family, member 2
Zfp462	-3.917470935	3.70E-12	1.90E-10	1739	1664	1150	59	104	130	4.540016076	4.462974341	4.200286607	0.367067924	0.61278549	0.471010804	Zfp462	ENSMUSG00000060206	242466	zinc finger protein 462
Rnf144b	-3.905217137	3.98E-06	1.13E-05	285	291	221	4	26	36	1.935277307	1.951785808	1.825447716	-3.31221402	-1.347576962	-1.343349597	Rnf144b	ENSMUSG00000038068	218215	ring finger protein 144B
Sarm1	-3.897278562	3.72E-12	1.91E-10	1680	1435	1323	60	88	151	4.4902503	4.249517863	4.402320084	0.391050729	0.374210918	0.684990914	Sarm1	ENSMUSG00000050132	237868	sterile alpha and HEAT/Armadillo motif containing 1
Abat	-3.890549568	0.001085114	0.001776827	85	111	63	0	14	15	0.202398193	0.569887759	0.029248271	-6.138067722	-2.196656353	-2.535390406	Abat	ENSMUSG00000057880	268860	4-aminobutyrate aminotransferase
Igfbp2	-3.88649901	5.14E-07	1.91E-06	161	161	219	11	7	15	1.11549545	1.102096682	1.812384999	-1.988449026	-3.105680466	-2.535390406	Igfbp2	ENSMUSG00000039323	16008	insulin-like growth factor binding protein 2
Sgca	-3.882637074	8.48E-08	4.19E-07	271	401	354	22	14	29	1.862884916	2.412915599	2.502977541	-1.029675411	-2.196656353	-1.642801402	Sgca	ENSMUSG00000001508	20391	sarcoglycan, alpha (dystrophin-associated glycoprotein)
Csdc2	-3.867934232	4.39E-09	3.90E-08	258	311	245	11	19	22	1.792246876	2.047340664	1.973616794	-1.988449026	-1.781009857	-2.021139478	Csdc2	ENSMUSG00000042109	105859	cold shock domain containing C2, RNA binding
Slit1	-3.861953244	7.85E-09	6.15E-08	362	251	231	13	16	24	2.279165336	1.739297635	1.889043966	-1.760000954	-2.015797488	-1.902554351	Slit1	ENSMUSG00000025020	20562	slit homolog 1 (Drosophila)
Clgn	-3.859909979	1.57E-06	5.02E-06	162	88	101	6	5	9	1.124370213	0.238505826	0.702607511	-2.796722105	-3.522243839	-3.195280444	Clgn	ENSMUSG00000002190	12745	calmegin
Cnga3	-3.857296074	2.89E-09	2.79E-08	1376	1533	1243	86	59	140	4.20247089	4.344755975	4.312395665	0.905694456	-0.194830132	0.576869982	Cnga3	ENSMUSG00000026114	12790	cyclic nucleotide gated channel alpha 3
Vwa2	-3.850258464	1.77E-07	7.73E-07	581	556	597	49	24	43	2.960122171	2.883325515	3.255487429	0.102372519	-1.458716487	-1.095496309	Vwa2	ENSMUSG00000025082	240675	von Willebrand factor A domain containing 2
Prph2	-3.848755099	3.75E-08	2.13E-07	269	309	298	19	16	20	1.852240109	2.038064999	2.255219449	-1.234591254	-2.015797488	-2.150351998	Prph2	ENSMUSG00000023978	19133	peripherin 2
Kcnip3	-3.846237417	4.92E-08	2.66E-07	309	279	285	14	12	36	2.051506152	1.891259511	2.191064747	-1.658050119	-2.403482126	-1.343349597	Kcnip3	ENSMUSG00000079056	56461	Kv channel interacting protein 3, calsenilin
Sp9	-3.845600398	4.63E-06	1.30E-05	278	266	194	9	37	10	1.899535132	1.822690488	1.638262189	-2.260004274	-0.854145463	-3.06216365	Sp9	ENSMUSG00000068859	381373	trans-acting transcription factor 9
F5	-3.838554121	2.96E-08	1.76E-07	513	513	466	24	20	68	2.780891721	2.767432149	2.898689328	-0.907633835	-1.71053355	-0.45048178	F5	ENSMUSG00000026579	14067	coagulation factor V
St6galnac2	-3.83533461	6.42E-07	2.31E-06	156	144	84	5	6	13	1.070283784	0.942230926	0.439258596	-3.031565593	-3.298979292	-2.723685638	St6galnac2	ENSMUSG00000057286	20446	ST6 (alpha-N-acetyl-neuraminyl-2,3-beta-galactosyl-1,3)-N-acetylgalactosaminide alpha-2,6-sialyltransferase 2
Elfn1	-3.834792549	8.48E-10	1.06E-08	729	751	613	42	35	63	3.286968306	3.316332486	3.293587583	-0.116843135	-0.932201353	-0.558444785	Elfn1	ENSMUSG00000048988	243312	leucine rich repeat and fibronectin type III, extracellular 1
Ces2e	-3.834576318	4.62E-13	5.37E-11	3134	3204	2832	130	190	333	5.389371324	5.407746538	5.49981202	1.498091921	1.476125289	1.818983718	Ces2e	ENSMUSG00000031886	234673	carboxylesterase 2E
Tekt4	-3.833634129	2.89E-10	4.79E-09	857	759	689	41	39	78	3.520031199	3.331597788	3.461974033	-0.151066877	-0.780096843	-0.256135646	Tekt4	ENSMUSG00000024175	71840	tektin 4
Tmem171	-3.825432073	1.20E-09	1.39E-08	477	544	402	17	40	42	2.676147093	2.851908524	2.685992122	-1.389396011	-0.744450671	-1.128401796	Tmem171	ENSMUSG00000052485	380863	transmembrane protein 171
Gli2	-3.814710116	4.92E-09	4.25E-08	370	370	265	18	17	32	2.310609659	2.297160876	2.086433712	-1.309918261	-1.933215921	-1.50679192	Gli2	ENSMUSG00000048402	14633	GLI-Kruppel family member GLI2
Tdrd5	-3.808753522	7.14E-08	3.61E-07	739	698	530	38	63	33	3.306595456	3.210902754	3.084019996	-0.258896737	-0.101682706	-1.464162917	Tdrd5	ENSMUSG00000060985	214575	tudor domain containing 5
Igf2bp3	-3.806860693	8.13E-09	6.32E-08	755	905	636	55	43	54	3.33745386	3.585087392	3.346651722	0.266939256	-0.642510346	-0.775818015	Igf2bp3	ENSMUSG00000029814	140488	insulin-like growth factor 2 mRNA binding protein 3
Jph2	-3.797887076	7.01E-10	9.21E-09	937	907	767	33	84	71	3.648632578	3.588268386	3.616507567	-0.458721058	0.307849125	-0.389380765	Jph2	ENSMUSG00000017817	59091	junctophilin 2
Gprin1	-3.791592987	8.15E-07	2.84E-06	142	172	101	4	8	18	0.935590163	1.196834145	0.702607511	-3.31221402	-2.935247198	-2.292285925	Gprin1	ENSMUSG00000069227	26913	G protein-regulated inducer of neurite outgrowth 1
Flywch2	-3.789150874	5.73E-08	3.02E-07	263	241	239	15	11	25	1.819826164	1.680897981	1.937976596	-1.56283076	-2.519193702	-1.846727419	Flywch2	ENSMUSG00000023911	76917	FLYWCH family member 2
1700003F12Rik	-3.782940348	2.28E-07	9.62E-07	271	269	281	22	13	20	1.862884916	1.83880583	2.170736814	-1.029675411	-2.296366073	-2.150351998	1700003F12Rik	ENSMUSG00000038523	75480	RIKEN cDNA 1700003F12 gene
Nol3	-3.768875736	4.29E-09	3.82E-08	537	570	455	34	26	49	2.846721767	2.91913436	2.864292325	-0.416480596	-1.347576962	-0.912421197	Nol3	ENSMUSG00000014776	78688	nucleolar protein 3 (apoptosis repressor with CARD domain)
AU021092	-3.768668411	8.61E-06	2.23E-05	167	201	242	22	7	14	1.167943145	1.420331214	1.955906748	-1.029675411	-3.105680466	-2.62646825	AU021092	ENSMUSG00000051669	239691	expressed sequence AU021092
Mfng	-3.761747793	0.000119126	0.000235079	76	62	72	1	3	17	0.043041535	-0.259466372	0.219381952	-4.803165618	-4.11026294	-2.368857708	Mfng	ENSMUSG00000018169	17305	MFNG O-fucosylpeptide 3-beta-N-acetylglucosaminyltransferase
Lama2	-3.75453078	4.74E-10	6.88E-09	1499	1463	1151	93	83	110	4.325899501	4.277376284	4.201539611	1.017765266	0.2907705	0.232687288	Lama2	ENSMUSG00000019899	16773	laminin, alpha 2
Fam167a	-3.751483177	9.54E-10	1.16E-08	658	592	572	35	32	65	3.139363516	2.97366897	3.193865393	-0.375441787	-1.057824439	-0.514285428	Fam167a	ENSMUSG00000035095	219148	family with sequence similarity 167, member A
Cyp27a1	-3.746998408	6.12E-10	8.31E-09	566	437	436	25	35	40	2.922455822	2.536629728	2.802876501	-0.850278119	-0.932201353	-1.196553701	Cyp27a1	ENSMUSG00000026170	104086	cytochrome P450, family 27, subfamily a, polypeptide 1
AI414108	-3.742517595	3.62E-11	9.97E-10	2536	2195	1870	82	175	253	5.08403613	4.86231513	4.901261899	0.837514988	1.358111797	1.42443359	Igsf9b	ENSMUSG00000034275	235086	immunoglobulin superfamily, member 9B
Tnfrsf19	-3.741715517	7.67E-09	6.05E-08	470	526	421	15	42	54	2.654866317	2.803461766	2.752473186	-1.56283076	-0.675696506	-0.775818015	Tnfrsf19	ENSMUSG00000060548	29820	tumor necrosis factor receptor superfamily, member 19
Ttll9	-3.740474786	1.37E-09	1.53E-08	429	513	453	21	41	38	2.523494034	2.767432149	2.85794925	-1.094799501	-0.709664052	-1.268085372	Ttll9	ENSMUSG00000074673	74711	tubulin tyrosine ligase-like family, member 9
Nog	-3.737736992	5.32E-06	1.46E-05	79	92	90	3	4	12	0.098139533	0.301881035	0.53778673	-3.660973051	-3.786500108	-2.827930519	Nog	ENSMUSG00000048616	18121	noggin
Mgat5b	-3.724433505	1.34E-06	4.37E-06	152	101	160	7	6	16	1.033065777	0.435049065	1.361675143	-2.594808743	-3.298979292	-2.449722497	Mgat5b	ENSMUSG00000043857	268510	mannoside acetylglucosaminyltransferase 5, isoenzyme B
Coch	-3.723552634	2.14E-07	9.11E-07	708	765	635	17	71	99	3.244861101	3.342941691	3.34438472	-1.389396011	0.068305663	0.082619958	Coch	ENSMUSG00000020953	12810	cochlin
2610318N02Rik	-3.714456525	2.32E-06	7.03E-06	98	98	89	6	5	7	0.405353484	0.392011188	0.521825601	-2.796722105	-3.522243839	-3.505213359	2610318N02Rik	ENSMUSG00000049916	70458	RIKEN cDNA 2610318N02 gene
Sytl1	-3.710913827	1.05E-14	6.35E-12	5649	5531	5004	266	428	517	6.23914404	6.195209701	6.320876029	2.52729395	2.643636285	2.451558053	Sytl1	ENSMUSG00000028860	269589	synaptotagmin-like 1
Cd302	-3.708941568	3.85E-11	1.04E-09	659	719	608	34	50	61	3.141550869	3.25360287	3.281789013	-0.416480596	-0.429402747	-0.603998608	Cd302	ENSMUSG00000060703	66205	CD302 antigen
Aldh3b1	-3.705935716	1.47E-10	2.87E-09	899	951	785	51	70	69	3.588973685	3.656532374	3.649935347	0.159339525	0.048120641	-0.429825908	Aldh3b1	ENSMUSG00000024885	67689	aldehyde dehydrogenase 3 family, member B1
Fam46c	-3.701463101	1.03E-08	7.58E-08	359	411	391	14	38	38	2.267194749	2.448358163	2.646054779	-1.658050119	-0.816646122	-1.268085372	Fam46c	ENSMUSG00000044468	74645	family with sequence similarity 46, member C
Acvrl1	-3.695908592	7.60E-13	7.29E-11	1505	1536	1373	73	116	143	4.331658533	4.347574525	4.45580337	0.671200151	0.76894034	0.607170161	Acvrl1	ENSMUSG00000000530	11482	activin A receptor, type II-like 1
Chst2	-3.687615655	5.09E-13	5.58E-11	2770	2644	2314	113	205	287	5.211316342	5.130696766	5.208480958	1.296993676	1.585210899	1.605442527	Chst2	ENSMUSG00000033350	54371	carbohydrate sulfotransferase 2
Plch2	-3.686791648	2.15E-10	3.80E-09	3004	2696	2110	174	191	202	5.328272107	5.158783808	5.075388655	1.916832583	1.483659957	1.101577088	Plch2	ENSMUSG00000029055	269615	phospholipase C, eta 2
Ptprd	-3.684560825	4.81E-09	4.18E-08	382	375	282	22	22	30	2.356527306	2.316470628	2.175845713	-1.029675411	-1.579137762	-1.596025654	Ptprd	ENSMUSG00000028399	19266	protein tyrosine phosphatase, receptor type, D
Ncan	-3.681475584	4.19E-09	3.75E-08	367	335	251	13	23	37	2.298898205	2.154232088	2.008397725	-1.760000954	-1.517671049	-1.305226731	Ncan	ENSMUSG00000002341	13004	neurocan
3300005D01Rik	-3.67037817	1.27E-07	5.86E-07	213	233	187	11	10	29	1.516978224	1.632414137	1.585490118	-1.988449026	-2.645001603	-1.642801402	3300005D01Rik	ENSMUSG00000096965	78512	RIKEN cDNA 3300005D01 gene
Mgarp	-3.665485292	3.83E-06	1.09E-05	135	179	97	11	5	13	0.86321387	1.254035668	0.644827833	-1.988449026	-3.522243839	-2.723685638	Mgarp	ENSMUSG00000037161	67749	mitochondria localized glutamic acid rich protein
Prrg4	-3.654771401	4.47E-15	4.28E-12	7710	7091	5869	372	529	691	6.687806906	6.55359695	6.55087118	3.01015745	2.948667206	2.869136177	Prrg4	ENSMUSG00000027171	228413	proline rich Gla (G-carboxyglutamic acid) 4 (transmembrane)
Mmrn2	-3.648655255	1.91E-07	8.29E-07	215	236	209	10	11	35	1.530394869	1.650787048	1.745236109	-2.117846781	-2.519193702	-1.382507256	Mmrn2	ENSMUSG00000041445	105450	multimerin 2
Tcn2	-3.648484955	6.37E-12	2.83E-10	2794	2646	2517	168	178	265	5.223757637	5.131787209	5.329752627	1.86640025	1.38249943	1.490942926	Tcn2	ENSMUSG00000020432	21452	transcobalamin 2
Rap1gap	-3.637049732	5.76E-12	2.62E-10	2630	2471	2117	154	167	233	5.136522599	5.033110536	5.080164916	1.741380015	1.290987727	1.306281113	Rap1gap	ENSMUSG00000041351	110351	Rap1 GTPase-activating protein
Lmtk3	-3.625264715	3.05E-08	1.80E-07	358	379	207	12	23	41	2.263182379	2.331734476	1.73142297	-1.869707915	-1.517671049	-1.162075355	Lmtk3	ENSMUSG00000062044	381983	lemur tyrosine kinase 3
2700070H01Rik	-3.62380354	2.65E-05	6.04E-05	127	80	101	10	3	10	0.775792142	0.102737597	0.702607511	-2.117846781	-4.11026294	-3.06216365	2700070H01Rik	NA	72609	RIKEN cDNA 2700070H01 gene
Krt84	-3.622311768	8.96E-05	0.000181746	103	102	38	7	2	7	0.476393142	0.449114368	-0.686957837	-2.594808743	-4.528363528	-3.505213359	Krt84	ENSMUSG00000044294	16680	keratin 84
Pde2a	-3.620264418	1.02E-10	2.17E-09	1058	892	985	61	68	99	3.823664437	3.564238186	3.97703503	0.414641363	0.006883078	0.082619958	Pde2a	ENSMUSG00000030653	207728	phosphodiesterase 2A, cGMP-stimulated
Kif17	-3.610626204	2.99E-06	8.81E-06	121	94	86	3	8	13	0.706563853	0.332554331	0.472854541	-3.660973051	-2.935247198	-2.723685638	Kif17	ENSMUSG00000028758	16559	kinesin family member 17
Ano1	-3.609600089	2.14E-13	3.10E-11	3436	3333	2973	192	230	357	5.522053224	5.464675031	5.569888747	2.058342895	1.750478584	1.918995255	Ano1	ENSMUSG00000031075	101772	anoctamin 1, calcium activated chloride channel
Cobl	-3.609497747	0.000114871	0.000227639	108	71	65	1	7	17	0.544098293	-0.06702722	0.073718376	-4.803165618	-3.105680466	-2.368857708	Cobl	ENSMUSG00000020173	12808	cordon-bleu WH2 repeat
Gsdma	-3.608719672	9.37E-05	0.000189274	144	103	89	11	2	17	0.955619287	0.463043866	0.521825601	-1.988449026	-4.528363528	-2.368857708	Gsdma	ENSMUSG00000017204	57911	gasdermin A
Asxl3	-3.604181448	0.000298341	0.000544622	83	89	54	10	1	8	0.168475623	0.254612531	-0.189802407	-2.117846781	-5.119471787	-3.34194003	Asxl3	ENSMUSG00000045215	211961	additional sex combs like 3 (Drosophila)
Wnt8b	-3.586740041	5.38E-07	1.98E-06	217	196	216	18	15	14	1.543687891	1.384184601	1.792566446	-1.309918261	-2.103394675	-2.62646825	Wnt8b	ENSMUSG00000036961	22423	wingless-type MMTV integration site family, member 8B
Sox13	-3.586131795	5.94E-09	4.95E-08	1138	1066	856	75	90	73	3.928723659	3.82104731	3.774718127	0.709851198	0.406281139	-0.350038627	Sox13	ENSMUSG00000070643	20668	SRY (sex determining region Y)-box 13
Fsd1	-3.574983932	7.23E-11	1.65E-09	766	957	814	41	67	105	3.358292505	3.665595773	3.702213347	-0.151066877	-0.014186317	0.166403023	Fsd1	ENSMUSG00000011589	240121	fibronectin type 3 and SPRY domain-containing protein
Prrt4	-3.573453074	6.01E-06	1.63E-05	87	105	93	3	6	16	0.23554142	0.490505766	0.584637196	-3.660973051	-3.298979292	-2.449722497	Prrt4	ENSMUSG00000079654	101359	proline-rich transmembrane protein 4
Spry1	-3.569990939	2.89E-09	2.79E-08	308	291	269	16	22	31	2.046845709	1.951785808	2.107975799	-1.473508754	-1.579137762	-1.550718985	Spry1	ENSMUSG00000037211	24063	sprouty homolog 1 (Drosophila)
Wnt6	-3.562073546	1.81E-07	7.92E-07	181	191	224	10	21	16	1.283379394	1.347109011	1.844822668	-2.117846781	-1.643340287	-2.449722497	Wnt6	ENSMUSG00000033227	22420	wingless-type MMTV integration site family, member 6
5830416P10Rik	-3.561988322	8.40E-10	1.05E-08	772	741	499	44	54	59	3.369533436	3.297020873	2.997217519	-0.05073897	-0.32041632	-0.651037847	Mirt1	ENSMUSG00000097636	381232	myocardial infarction associated transcript 1
Snhg14	-3.561905866	0.000192122	0.000362471	78	45	66	1	11	5	0.080006337	-0.712575689	0.095449737	-4.803165618	-2.519193702	-3.900477895	Snhg14	ENSMUSG00000100826	52480	small nucleolar RNA host gene 14
Ankrd6	-3.556826705	3.36E-06	9.77E-06	263	202	148	5	27	25	1.819826164	1.427453116	1.249846587	-3.031565593	-1.295061236	-1.846727419	Ankrd6	ENSMUSG00000040183	140577	ankyrin repeat domain 6
Faim2	-3.556257733	2.83E-08	1.69E-07	283	250	214	15	23	20	1.925155293	1.733562908	1.779201192	-1.56283076	-1.517671049	-2.150351998	Faim2	ENSMUSG00000023011	72393	Fas apoptotic inhibitory molecule 2
Irf6	-3.554815121	3.30E-12	1.78E-10	1872	2087	1754	111	172	185	4.646276017	4.789561234	4.808917711	1.271380784	1.33330481	0.975624005	Irf6	ENSMUSG00000026638	54139	interferon regulatory factor 6
Tcea3	-3.553782994	1.54E-11	5.30E-10	1062	1076	980	66	80	108	3.829103127	3.83450448	3.969699692	0.527133445	0.238286988	0.206537884	Tcea3	ENSMUSG00000001604	21401	transcription elongation factor A (SII), 3
Dpyd	-3.552166869	2.19E-05	5.11E-05	95	85	77	4	3	17	0.3609876	0.189077839	0.3151005	-3.31221402	-4.11026294	-2.368857708	Dpyd	ENSMUSG00000033308	99586	dihydropyrimidine dehydrogenase
Cyp2d22	-3.550477907	6.86E-05	0.000142529	98	104	66	3	3	24	0.405353484	0.476840158	0.095449737	-3.660973051	-4.11026294	-1.902554351	Cyp2d22	ENSMUSG00000061740	56448	cytochrome P450, family 2, subfamily d, polypeptide 22
Hoxd9	-3.550313107	9.01E-11	1.95E-09	719	719	633	33	65	77	3.267070451	3.25360287	3.33984	-0.458721058	-0.057271304	-0.274433638	Hoxd9	ENSMUSG00000043342	15438	homeobox D9
Adamts12	-3.541992302	2.74E-06	8.15E-06	377	314	228	29	11	40	2.337572239	2.061143293	1.870257708	-0.641256261	-2.519193702	-1.196553701	Adamts12	ENSMUSG00000047497	239337	a disintegrin-like and metallopeptidase (reprolysin type) with thrombospondin type 1 motif, 12
Cngb1	-3.539132219	6.51E-08	3.34E-07	401	370	308	12	39	48	2.426367372	2.297160876	2.302698149	-1.869707915	-0.780096843	-0.941365503	Cngb1	ENSMUSG00000031789	333329	cyclic nucleotide gated channel beta 1
Medag	-3.537569259	1.98E-08	1.27E-07	430	455	345	15	45	50	2.526844761	2.594723321	2.465918811	-1.56283076	-0.578343935	-0.884046189	Medag	ENSMUSG00000029659	70717	mesenteric estrogen dependent adipogenesis
Casq2	-3.536979821	7.72E-08	3.87E-07	503	462	454	38	23	61	2.75255055	2.616698246	2.861124273	-0.258896737	-1.517671049	-0.603998608	Casq2	ENSMUSG00000027861	12373	calsequestrin 2
Cpne5	-3.524909364	3.64E-09	3.37E-08	355	425	366	17	32	52	2.251077877	2.49655897	2.55095334	-1.389396011	-1.057824439	-0.828917457	Cpne5	ENSMUSG00000024008	240058	copine V
Btn1a1	-3.524033481	1.16E-09	1.35E-08	529	440	325	25	32	49	2.825110465	2.546475901	2.379990322	-0.850278119	-1.057824439	-0.912421197	Btn1a1	ENSMUSG00000000706	12231	butyrophilin, subfamily 1, member A1
Trpv1	-3.523000621	2.08E-06	6.39E-06	202	217	165	5	23	29	1.440869812	1.530266319	1.405827689	-3.031565593	-1.517671049	-1.642801402	Trpv1	ENSMUSG00000005952	193034	transient receptor potential cation channel, subfamily V, member 1
Nod2	-3.519317649	1.63E-10	3.05E-09	1187	1169	953	79	74	124	3.989487507	3.953987092	3.929431199	0.784178986	0.127219629	0.403554235	Nod2	ENSMUSG00000055994	257632	nucleotide-binding oligomerization domain containing 2
Lhfpl1	-3.50726197	5.40E-07	1.99E-06	171	213	211	8	13	36	1.201878091	1.503557886	1.758918247	-2.417716017	-2.296366073	-1.343349597	Lhfpl1	ENSMUSG00000041700	237091	lipoma HMGIC fusion partner-like 1
Laptm5	-3.507103378	1.75E-06	5.51E-06	199	127	168	5	18	22	1.419396697	0.76241695	1.431684837	-3.031565593	-1.855106578	-2.021139478	Laptm5	ENSMUSG00000028581	16792	lysosomal-associated protein transmembrane 5
Kif19a	-3.498709143	1.32E-06	4.32E-06	142	186	106	6	18	12	0.935590163	1.309055434	0.771722629	-2.796722105	-1.855106578	-2.827930519	Kif19a	ENSMUSG00000010021	286942	kinesin family member 19A
Sod3	-3.498508011	0.000103241	0.000206564	188	226	220	3	36	40	1.33780897	1.588611592	1.818931142	-3.660973051	-0.892645578	-1.196553701	Sod3	ENSMUSG00000072941	20657	superoxide dismutase 3, extracellular
Gpr160	-3.491126525	3.76E-06	1.08E-05	72	114	113	6	6	11	-0.033856806	0.607998704	0.863237687	-2.796722105	-3.298979292	-2.940298592	Gpr160	ENSMUSG00000037661	71862	G protein-coupled receptor 160
Papln	-3.488472019	2.20E-05	5.13E-05	83	99	83	8	3	11	0.168475623	0.40650027	0.422162616	-2.417716017	-4.11026294	-2.940298592	Papln	ENSMUSG00000021223	170721	papilin, proteoglycan-like sulfated glycoprotein
Sh3yl1	-3.478440481	6.25E-12	2.80E-10	1031	1054	825	58	86	107	3.78640703	3.80473124	3.721557688	0.342679689	0.341411556	0.193283269	Sh3yl1	ENSMUSG00000020669	24057	Sh3 domain YSC-like 1
1700003M07Rik	-3.476677344	6.27E-12	2.80E-10	1260	1273	1028	74	108	124	4.075516585	4.076836591	4.038625251	0.690655108	0.666737052	0.403554235	1700003M07Rik	NA	72225	RIKEN cDNA 1700003M07 gene
Fgd4	-3.475079913	1.58E-07	7.08E-07	234	206	181	8	24	24	1.651990819	1.45559427	1.538667796	-2.417716017	-1.458716487	-1.902554351	Fgd4	ENSMUSG00000022788	224014	FYVE, RhoGEF and PH domain containing 4
Ltb4r2	-3.468373022	3.04E-09	2.91E-08	629	632	545	32	72	56	3.074443131	3.067831294	3.124217376	-0.502235672	0.088212164	-0.724603757	Ltb4r2	ENSMUSG00000040432	57260	leukotriene B4 receptor 2
Fam13a	-3.453958249	9.19E-09	6.92E-08	338	335	231	21	22	33	2.180498515	2.154232088	1.889043966	-1.094799501	-1.579137762	-1.464162917	Fam13a	ENSMUSG00000037709	58909	family with sequence similarity 13, member A
Dusp4	-3.446154082	4.05E-09	3.65E-08	861	702	717	42	93	70	3.526740937	3.219134142	3.519370572	-0.116843135	0.453088151	-0.409461609	Dusp9	ENSMUSG00000031383	75590	dual specificity phosphatase 9
Ccdc125	-3.444023741	0.000561621	0.000967788	96	98	62	11	1	16	0.375928336	0.392011188	0.006488391	-1.988449026	-5.119471787	-2.449722497	Ccdc125	ENSMUSG00000048924	76041	coiled-coil domain containing 125
Slc29a4	-3.441636909	1.17E-11	4.33E-10	882	910	763	47	78	107	3.561464036	3.593026766	3.608972802	0.043063281	0.202206326	0.193283269	Slc29a4	ENSMUSG00000050822	243328	solute carrier family 29 (nucleoside transporters), member 4
Krt71	-3.438682094	1.04E-06	3.51E-06	260	227	210	7	30	34	1.803341937	1.594951112	1.752093397	-2.594808743	-1.148093636	-1.422757456	Krt71	ENSMUSG00000051879	56735	keratin 71
Trp73	-3.436911209	5.59E-06	1.53E-05	202	223	179	5	29	31	1.440869812	1.569424155	1.522716466	-3.031565593	-1.195438616	-1.550718985	Trp73	ENSMUSG00000029026	22062	transformation related protein 73
Trpm2	-3.435999204	2.20E-08	1.39E-07	230	228	188	11	18	29	1.627229508	1.601262897	1.593148202	-1.988449026	-1.855106578	-1.642801402	Trpm2	ENSMUSG00000009292	28240	transient receptor potential cation channel, subfamily M, member 2
Aknad1	-3.435901305	1.43E-10	2.82E-09	814	923	793	56	61	113	3.445859115	3.613466959	3.664547096	0.292630423	-0.147504793	0.271043624	Aknad1	ENSMUSG00000049565	329738	AKNA domain containing 1
Arhgef33	-3.434081286	4.28E-09	3.81E-08	405	335	282	23	25	41	2.440649405	2.154232088	2.175845713	-0.967364529	-1.40207677	-1.162075355	Arhgef33	ENSMUSG00000054901	381112	Rho guanine nucleotide exchange factor (GEF) 33
Spns3	-3.432827906	2.56E-05	5.88E-05	87	78	88	2	10	13	0.23554142	0.066700787	0.505685909	-4.121868359	-2.645001603	-2.723685638	Spns3	ENSMUSG00000020798	77577	spinster homolog 3
Tmc7	-3.431278826	1.75E-08	1.16E-07	301	260	214	12	24	35	2.013794133	1.789909496	1.779201192	-1.869707915	-1.458716487	-1.382507256	Tmc7	ENSMUSG00000042246	209760	transmembrane channel-like gene family 7
Map3k13	-3.428646388	1.89E-10	3.46E-09	979	873	719	58	83	84	3.711822315	3.53321382	3.523384254	0.342679689	0.2907705	-0.150968966	Map3k13	ENSMUSG00000033618	71751	mitogen-activated protein kinase kinase kinase 13
Tas1r1	-3.419697387	2.76E-10	4.61E-09	588	522	443	34	46	57	2.977368825	2.792471259	2.825808679	-0.416480596	-0.547300154	-0.699662648	Tas1r1	ENSMUSG00000028950	110326	taste receptor, type 1, member 1
Grhl3	-3.414079169	1.18E-11	4.33E-10	1551	1647	1251	100	142	155	4.375063559	4.44816905	4.321644565	1.121754277	1.058503667	0.722381723	Grhl3	ENSMUSG00000037188	230824	grainyhead-like 3 (Drosophila)
Adam8	-3.413910103	3.15E-13	4.08E-11	2090	2146	1944	133	181	251	4.805113198	4.829760346	4.957225754	1.530842954	1.406481653	1.41304438	Adam8	ENSMUSG00000025473	11501	a disintegrin and metallopeptidase domain 8
Psd2	-3.411717325	3.43E-07	1.35E-06	247	218	159	18	12	24	1.729650223	1.536866879	1.352680136	-1.309918261	-2.403482126	-1.902554351	Psd2	ENSMUSG00000024347	74002	pleckstrin and Sec7 domain containing 2
Ecscr	-3.409685859	1.40E-07	6.38E-07	223	289	257	10	26	40	1.582847493	1.941872792	2.042359848	-2.117846781	-1.347576962	-1.196553701	Ecscr	ENSMUSG00000073599	68545	endothelial cell surface expressed chemotaxis and apoptosis regulator
Fam81a	-3.402205656	1.30E-12	1.03E-10	1317	1313	1119	74	115	160	4.13929561	4.121434107	4.160893653	0.690655108	0.756553926	0.767797368	Fam81a	ENSMUSG00000032224	76886	family with sequence similarity 81, member A
Igsf9b	-3.395899904	1.02E-12	8.82E-11	3974	3754	3078	231	368	391	5.731854708	5.63623034	5.619947804	2.324298845	2.426265624	2.04976867	Igsf9b	ENSMUSG00000034275	235086	immunoglobulin superfamily, member 9B
Vwa1	-3.386974153	2.72E-14	9.39E-12	5383	5122	4653	334	474	599	6.169572365	6.084398936	6.215974756	2.854992185	2.790594388	2.663437028	Vwa1	ENSMUSG00000042116	246228	von Willebrand factor A domain containing 1
Neurl2	-3.386493732	4.12E-12	2.06E-10	2643	2262	1689	137	186	291	5.14363336	4.905672259	4.754466416	1.5733856	1.445586834	1.625318404	Neurl2	ENSMUSG00000039873	415115	neuralized E3 ubiquitin protein ligase 2
Camk4	-3.380573657	2.35E-09	2.35E-08	368	360	260	21	29	39	2.302812596	2.257748282	2.05904573	-1.094799501	-1.195438616	-1.231876247	Camk4	ENSMUSG00000038128	12326	calcium/calmodulin-dependent protein kinase IV
Ryr1	-3.3799114	1.97E-10	3.56E-09	674	557	460	34	52	70	3.173969334	2.885912975	2.880029062	-0.416480596	-0.373880624	-0.409461609	Ryr1	ENSMUSG00000030592	20190	ryanodine receptor 1, skeletal muscle
Hoxb9	-3.378962488	2.93E-13	3.87E-11	2045	2174	1670	129	175	245	4.773727222	4.848452933	4.738153825	1.48700758	1.358111797	1.378327139	Hoxb9	ENSMUSG00000020875	15417	homeobox B9
Plekhn1	-3.368920937	4.84E-09	4.20E-08	1354	1120	762	92	82	115	4.179236237	3.892268722	3.607082946	1.002278375	0.273487274	0.296059445	Plekhn1	ENSMUSG00000078485	231002	pleckstrin homology domain containing, family N member 1
Lhx5	-3.366476066	2.91E-06	8.59E-06	110	134	122	5	9	24	0.570315048	0.839190482	0.972965103	-3.031565593	-2.78283762	-1.902554351	Lhx5	ENSMUSG00000029595	16873	LIM homeobox protein 5
Gjc2	-3.363482609	8.50E-09	6.50E-08	476	413	476	24	56	51	2.673126134	2.455343375	2.929263238	-0.907633835	-0.268862733	-0.856218514	Gjc2	ENSMUSG00000043448	118454	gap junction protein, gamma 2
A830082K12Rik	-3.361346691	5.07E-06	1.40E-05	85	133	70	4	8	14	0.202398193	0.828469816	0.179242596	-3.31221402	-2.935247198	-2.62646825	A830082K12Rik	NA	320174	RIKEN cDNA A830082K12 gene
Cbs	-3.359698511	1.35E-09	1.51E-08	625	645	603	41	45	99	3.065254867	3.097156657	3.269893156	-0.151066877	-0.578343935	0.082619958	Cbs	ENSMUSG00000024039	12411	cystathionine beta-synthase
Alpl	-3.356498929	5.41E-06	1.48E-05	357	238	270	32	12	42	2.259158819	1.662906939	2.113311434	-0.502235672	-2.403482126	-1.128401796	Alpl	ENSMUSG00000028766	11647	alkaline phosphatase, liver/bone/kidney
Fst	-3.348936889	1.87E-13	2.85E-11	3897	4266	3407	272	332	501	5.703634383	5.820636223	5.766416295	2.559395971	2.278156295	2.406323968	Fst	ENSMUSG00000021765	14313	follistatin
Gm15987	-3.348201808	0.000159831	0.000307036	56	80	71	4	2	18	-0.390447513	0.102737597	0.199451867	-3.31221402	-4.528363528	-2.292285925	Gm15987	NA	100504591	predicted gene 15987
Npepl1	-3.339280916	4.97E-15	4.28E-12	6623	6650	5793	419	630	790	6.468593516	6.460976656	6.532070004	3.181519832	3.200325871	3.061951723	Npepl1	ENSMUSG00000039263	228961	aminopeptidase-like 1
Amdhd1	-3.325779265	0.000917628	0.001520658	106	77	72	11	1	21	0.517396295	0.048339103	0.219381952	-1.988449026	-5.119471787	-2.084299634	Amdhd1	ENSMUSG00000015890	71761	amidohydrolase domain containing 1
Gm8773	-3.324171703	3.61E-05	8.00E-05	87	70	77	4	13	5	0.23554142	-0.087184798	0.3151005	-3.31221402	-2.296366073	-3.900477895	Gm8773	ENSMUSG00000073234	667705	predicted gene 8773
Fam83f	-3.318784594	1.94E-06	6.02E-06	137	105	80	5	10	15	0.884265952	0.490505766	0.369624462	-3.031565593	-2.645001603	-2.535390406	Fam83f	ENSMUSG00000022408	213956	family with sequence similarity 83, member F
Lpcat2	-3.315575826	1.62E-11	5.49E-10	834	859	749	55	79	103	3.480832622	3.509919135	3.582286845	0.266939256	0.220359448	0.139012421	Lpcat2	ENSMUSG00000033192	270084	lysophosphatidylcholine acyltransferase 2
Tmem179	-3.31273282	1.76E-05	4.20E-05	119	74	124	7	5	20	0.682729332	-0.008191195	0.996255741	-2.594808743	-3.522243839	-2.150351998	Tmem179	ENSMUSG00000054013	104885	transmembrane protein 179
Moxd1	-3.309942721	4.67E-06	1.30E-05	168	253	141	8	12	46	1.176502007	1.750699153	1.180372142	-2.417716017	-2.403482126	-1.001056717	Moxd1	ENSMUSG00000020000	59012	monooxygenase, DBH-like 1
Stab1	-3.309240348	1.00E-07	4.81E-07	274	299	190	22	23	24	1.878706294	1.990770453	1.608343487	-1.029675411	-1.517671049	-1.902554351	Stab1	ENSMUSG00000042286	192187	stabilin 1
Mertk	-3.30594338	2.38E-07	9.97E-07	290	250	270	11	37	38	1.960275937	1.733562908	2.113311434	-1.988449026	-0.854145463	-1.268085372	Mertk	ENSMUSG00000014361	17289	c-mer proto-oncogene tyrosine kinase
C1qtnf1	-3.298709441	1.57E-11	5.38E-10	3021	2885	2748	185	344	333	5.336410609	5.256497064	5.456386597	2.004947938	2.329234291	1.818983718	C1qtnf1	ENSMUSG00000017446	56745	C1q and tumor necrosis factor related protein 1
Pm20d2	-3.294812301	4.86E-07	1.82E-06	211	161	194	12	25	17	1.503435637	1.102096682	1.638262189	-1.869707915	-1.40207677	-2.368857708	Pm20d2	ENSMUSG00000054659	242377	peptidase M20 domain containing 2
Upp1	-3.293242684	2.57E-11	7.75E-10	1363	1259	1205	73	144	174	4.188786594	4.060895953	4.267635029	0.671200151	1.07854494	0.887844432	Upp1	ENSMUSG00000020407	22271	uridine phosphorylase 1
Pkd1l2	-3.289904436	1.01E-09	1.21E-08	417	412	375	29	35	54	2.482666292	2.451854996	2.58591639	-0.641256261	-0.932201353	-0.775818015	Pkd1l2	ENSMUSG00000034416	76645	polycystic kidney disease 1 like 2
Hs3st6	-3.284055084	1.14E-10	2.36E-09	744	664	661	41	72	98	3.316309799	3.138972238	3.402199067	-0.151066877	0.088212164	0.068170563	Hs3st6	ENSMUSG00000039628	328779	heparan sulfate (glucosamine) 3-O-sulfotransferase 6
Csgalnact1	-3.27465393	3.66E-05	8.09E-05	79	98	77	3	16	8	0.098139533	0.392011188	0.3151005	-3.660973051	-2.015797488	-3.34194003	Csgalnact1	ENSMUSG00000036356	234356	chondroitin sulfate N-acetylgalactosaminyltransferase 1
Stox2	-3.26574706	1.59E-07	7.09E-07	444	433	351	32	57	33	2.572955695	2.523396087	2.490730097	-0.502235672	-0.243760711	-1.464162917	Stox2	ENSMUSG00000038143	71069	storkhead box 2
Fam71f1	-3.263553943	8.62E-12	3.49E-10	1030	1065	955	64	105	146	3.785008476	3.819694663	3.932452902	0.483183478	0.626463706	0.636847029	Fam71f1	ENSMUSG00000039742	330277	family with sequence similarity 71, member F1
Fyb	-3.261763419	1.44E-07	6.56E-07	214	209	165	13	14	34	1.523702143	1.476345662	1.405827689	-1.760000954	-2.196656353	-1.422757456	Fyb	ENSMUSG00000022148	23880	FYN binding protein
Fah	-3.260838738	8.88E-15	5.62E-12	5023	4878	4389	334	471	657	6.069731611	6.013996542	6.131722415	2.854992185	2.781453246	2.796488924	Fah	ENSMUSG00000030630	14085	fumarylacetoacetate hydrolase
Rragd	-3.257771566	1.27E-10	2.56E-09	576	623	554	41	55	82	2.94767567	3.047174191	3.147808956	-0.151066877	-0.29440926	-0.185179745	Rragd	ENSMUSG00000028278	52187	Ras-related GTP binding D
Sptbn2	-3.257041475	4.13E-09	3.71E-08	712	615	556	33	85	81	3.252976842	3.028560675	3.152999548	-0.458721058	0.324727937	-0.202594239	Sptbn2	ENSMUSG00000067889	20743	spectrin beta, non-erythrocytic 2
Ugt8a	-3.247543808	7.62E-05	0.000156615	78	50	70	2	6	14	0.080006337	-0.56393341	0.179242596	-4.121868359	-3.298979292	-2.62646825	Ugt8a	ENSMUSG00000032854	22239	UDP galactosyltransferase 8A
Ces2b	-3.24671537	1.52E-06	4.87E-06	115	115	95	9	9	12	0.633845439	0.620481865	0.615046393	-2.260004274	-2.78283762	-2.827930519	Ces2b	ENSMUSG00000050097	234669	carboxyesterase 2B
Rab17	-3.242380946	4.97E-08	2.68E-07	184	230	166	12	19	27	1.306958242	1.613804223	1.414498333	-1.869707915	-1.781009857	-1.741164269	Rab17	ENSMUSG00000026304	19329	RAB17, member RAS oncogene family
Them5	-3.24212242	0.000135913	0.000265109	135	162	141	19	4	31	0.86321387	1.110970901	1.180372142	-1.234591254	-3.786500108	-1.550718985	Them5	ENSMUSG00000028148	66198	thioesterase superfamily member 5
Plekhg4	-3.238434124	2.03E-11	6.57E-10	4024	4004	3477	329	378	453	5.749888352	5.729217948	5.795749839	2.833274695	2.464845265	2.261433806	Plekhg4	ENSMUSG00000014782	102075	pleckstrin homology domain containing, family G (with RhoGef domain) member 4
Armcx6	-3.234136061	5.45E-07	2.00E-06	203	168	126	13	11	26	1.447957076	1.163099563	1.019176345	-1.760000954	-2.519193702	-1.792980542	Armcx6	ENSMUSG00000050394	278097	armadillo repeat containing, X-linked 6
Sptbn4	-3.233759182	1.43E-06	4.62E-06	262	230	205	26	13	33	1.814352322	1.613804223	1.717476297	-0.795115714	-2.296366073	-1.464162917	Sptbn4	ENSMUSG00000011751	80297	spectrin beta, non-erythrocytic 4
Gm16938	-3.232308288	1.37E-07	6.25E-07	160	177	136	11	16	19	1.106565755	1.237922486	1.128615897	-1.988449026	-2.015797488	-2.219574213	Gm16938	NA	330599	predicted gene, 16938
Gm684	-3.228483262	9.44E-05	0.000190484	104	97	81	8	3	24	0.49019075	0.377375113	0.387350617	-2.417716017	-4.11026294	-1.902554351	Gm684	ENSMUSG00000079559	100502940	predicted gene 684
Irak3	-3.225745786	1.60E-05	3.84E-05	65	81	71	3	8	11	-0.17915732	0.120423971	0.199451867	-3.660973051	-2.935247198	-2.940298592	Irak3	ENSMUSG00000020227	73914	interleukin-1 receptor-associated kinase 3
Hsh2d	-3.220171134	8.08E-07	2.83E-06	142	136	141	7	13	26	0.935590163	0.860395739	1.180372142	-2.594808743	-2.296366073	-1.792980542	Hsh2d	ENSMUSG00000062007	209488	hematopoietic SH2 domain containing
Tmc8	-3.210343344	3.58E-07	1.40E-06	171	172	120	8	19	21	1.201878091	1.196834145	0.949292287	-2.417716017	-1.781009857	-2.084299634	Tmc8	ENSMUSG00000050106	217356	transmembrane channel-like gene family 8
Cyfip2	-3.206462661	2.50E-08	1.54E-07	500	523	400	39	61	45	2.743938483	2.795226745	2.678812537	-0.222050665	-0.147504793	-1.031854761	Cyfip2	ENSMUSG00000020340	76884	cytoplasmic FMR1 interacting protein 2
Agap2	-3.205914868	3.23E-07	1.28E-06	253	195	187	17	14	37	1.764130076	1.376845315	1.585490118	-1.389396011	-2.196656353	-1.305226731	Agap2	ENSMUSG00000025422	216439	ArfGAP with GTPase domain, ankyrin repeat and PH domain 2
Ubash3b	-3.193395766	4.01E-08	2.25E-07	314	287	295	19	42	34	2.074585183	1.931891191	2.240665708	-1.234591254	-0.675696506	-1.422757456	Ubash3b	ENSMUSG00000032020	72828	ubiquitin associated and SH3 domain containing, B
Mb	-3.190605759	9.25E-05	0.000187033	103	151	102	10	4	33	0.476393142	1.010216367	0.716697962	-2.117846781	-3.786500108	-1.464162917	Mb	ENSMUSG00000018893	17189	myoglobin
Ly6d	-3.19020439	8.70E-06	2.25E-05	90	96	101	5	7	21	0.283870934	0.362589032	0.702607511	-3.031565593	-3.105680466	-2.084299634	Ly6d	ENSMUSG00000034634	17068	lymphocyte antigen 6 complex, locus D
Ppp4r4	-3.188078547	7.53E-06	1.98E-05	106	96	80	4	9	19	0.517396295	0.362589032	0.369624462	-3.31221402	-2.78283762	-2.219574213	Ppp4r4	ENSMUSG00000021209	74521	protein phosphatase 4, regulatory subunit 4
Itgb4	-3.182503469	2.17E-10	3.81E-09	1164	1177	1087	93	135	132	3.961284113	3.963817498	4.119069269	1.017765266	0.986082037	0.49281317	Itgb4	ENSMUSG00000020758	192897	integrin beta 4
Lamc3	-3.179598554	2.60E-07	1.07E-06	491	484	477	20	59	104	2.717789463	2.683660622	2.932285292	-1.163002877	-0.194830132	0.152772725	Lamc3	ENSMUSG00000026840	23928	laminin gamma 3
Susd4	-3.173666054	1.59E-08	1.07E-07	271	292	254	23	28	33	1.862884916	1.956716889	2.025478721	-0.967364529	-1.24439019	-1.464162917	Susd4	ENSMUSG00000038576	96935	sushi domain containing 4
Vash1	-3.171858082	1.25E-11	4.53E-10	1260	1151	1083	81	138	160	4.075516585	3.931620667	4.113754926	0.819954503	1.017566059	0.767797368	Vash1	ENSMUSG00000021256	238328	vasohibin 1
Syngr1	-3.170612895	6.73E-08	3.44E-07	260	337	320	20	43	35	1.803341937	2.162792272	2.357683998	-1.163002877	-0.642510346	-1.382507256	Syngr1	ENSMUSG00000022415	20972	synaptogyrin 1
Gpr55	-3.170339273	5.43E-06	1.49E-05	99	135	118	7	19	11	0.419844019	0.84983207	0.92522454	-2.594808743	-1.781009857	-2.940298592	Gpr55	ENSMUSG00000049608	227326	G protein-coupled receptor 55
Stk32c	-3.154969134	2.42E-06	7.30E-06	95	99	91	6	11	12	0.3609876	0.40650027	0.553573205	-2.796722105	-2.519193702	-2.827930519	Stk32c	ENSMUSG00000015981	57740	serine/threonine kinase 32C
Gm1661	-3.151839673	1.66E-07	7.36E-07	166	181	171	12	15	30	1.159333203	1.269970872	1.457086701	-1.869707915	-2.103394675	-1.596025654	Gm1661	ENSMUSG00000060268	381544	predicted gene 1661
Tdrd9	-3.144349709	1.57E-08	1.06E-07	309	283	242	17	36	39	2.051506152	1.911718389	1.955906748	-1.389396011	-0.892645578	-1.231876247	Tdrd9	ENSMUSG00000054003	74691	tudor domain containing 9
Fat2	-3.143074284	1.45E-08	9.95E-08	825	867	660	56	60	168	3.465199374	3.523276404	3.400017755	0.292630423	-0.170973417	0.837613677	Fat2	ENSMUSG00000055333	245827	FAT atypical cadherin 2
Ggt5	-3.137038012	9.06E-07	3.12E-06	154	145	135	8	22	18	1.051794794	0.952141489	1.11803805	-2.417716017	-1.579137762	-2.292285925	Ggt5	ENSMUSG00000006344	23887	gamma-glutamyltransferase 5
Def6	-3.133404805	7.74E-13	7.37E-11	2790	2690	2340	183	322	372	5.221691525	5.155570764	5.224594467	1.989322092	2.23416489	1.978155359	Def6	ENSMUSG00000002257	23853	differentially expressed in FDCP 6
Afap1l1	-3.130480426	5.62E-08	2.96E-07	395	382	326	40	31	47	2.404675674	2.343077308	2.384410497	-0.186122245	-1.102253137	-0.970902418	Afap1l1	ENSMUSG00000033032	106877	actin filament associated protein 1-like 1
Myh7b	-3.129593107	2.53E-07	1.05E-06	209	256	182	16	16	43	1.48976472	1.767634242	1.546577808	-1.473508754	-2.015797488	-1.095496309	Myh7b	ENSMUSG00000074652	668940	myosin, heavy chain 7B, cardiac muscle, beta
Mst1	-3.128644838	2.84E-08	1.69E-07	571	528	360	50	41	64	2.935120854	2.808925781	2.527164856	0.131137182	-0.709664052	-0.536196154	Mst1	ENSMUSG00000032591	15235	macrophage stimulating 1 (hepatocyte growth factor-like)
Rai2	-3.126808426	3.81E-09	3.48E-08	478	416	352	37	38	60	2.67916174	2.465758186	2.494824142	-0.296708567	-0.816646122	-0.627326521	Rai2	ENSMUSG00000043518	24004	retinoic acid induced 2
Nlrp1c-ps	-3.120931762	8.62E-06	2.23E-05	134	107	55	7	8	14	0.852571498	0.517454675	-0.163755079	-2.594808743	-2.935247198	-2.62646825	Nlrp1c-ps	ENSMUSG00000092528	627984	NLR family, pyrin domain containing 1C, pseudogene
Xirp1	-3.118435861	3.70E-07	1.44E-06	187	169	152	9	24	25	1.330157915	1.171607448	1.288094041	-2.260004274	-1.458716487	-1.846727419	Xirp1	ENSMUSG00000079243	22437	xin actin-binding repeat containing 1
Rasd1	-3.116567788	9.74E-08	4.69E-07	226	295	204	18	33	27	1.602035779	1.971409807	1.710452074	-1.309918261	-1.014723174	-1.741164269	Rasd1	ENSMUSG00000049892	19416	RAS, dexamethasone-induced 1
Neurl1a	-3.113799898	1.10E-11	4.13E-10	2579	2437	2142	205	277	308	5.108283088	5.013130505	5.097095059	2.152548572	2.017697322	1.706863066	Neurl1a	ENSMUSG00000006435	18011	neuralized E3 ubiquitin protein ligase 1A
Ptp4a3	-3.112961191	6.14E-14	1.66E-11	6554	6208	5525	505	649	898	6.453486766	6.361767429	6.46374454	3.450468416	3.243127274	3.246519473	Ptp4a3	ENSMUSG00000059895	19245	protein tyrosine phosphatase 4a3
Ms4a10	-3.108238674	6.34E-07	2.29E-06	145	164	100	8	15	22	0.96553053	1.128557238	0.688378084	-2.417716017	-2.103394675	-2.021139478	Ms4a10	ENSMUSG00000024731	69826	membrane-spanning 4-domains, subfamily A, member 10
Bscl2	-3.107540835	7.01E-14	1.78E-11	6267	5403	5177	434	629	850	6.388896791	6.161436664	6.369901995	3.232186592	3.198037602	3.16738875	Bscl2	ENSMUSG00000071657	14705	Berardinelli-Seip congenital lipodystrophy 2 (seipin)
Slc9a9	-3.10622539	2.47E-05	5.71E-05	191	192	68	9	9	34	1.360521649	1.354600745	0.137954426	-2.260004274	-2.78283762	-1.422757456	Slc9a9	ENSMUSG00000031129	331004	solute carrier family 9 (sodium/hydrogen exchanger), member 9
Mtmr7	-3.10201563	2.66E-08	1.61E-07	280	346	230	20	26	53	1.909837858	2.200696717	1.882809021	-1.163002877	-1.347576962	-0.802123454	Mtmr7	ENSMUSG00000039431	54384	myotubularin related protein 7
Gm10560	-3.094553847	1.01E-06	3.43E-06	139	166	108	10	19	15	0.90501525	1.145931778	0.798467468	-2.117846781	-1.781009857	-2.535390406	Gm10560	NA	100038526	predicted gene 10560
Tbkbp1	-3.085773274	6.26E-07	2.26E-06	174	140	137	9	22	20	1.22681553	0.901893505	1.139116752	-2.260004274	-1.579137762	-2.150351998	Tbkbp1	ENSMUSG00000038517	73174	TBK1 binding protein 1
Ank3	-3.083810664	8.28E-13	7.66E-11	1929	1887	1580	134	220	269	4.689524554	4.644303558	4.658274001	1.541596803	1.686624954	1.512448362	Ank3	ENSMUSG00000069601	11735	ankyrin 3, epithelial
Fam43b	-3.082990942	2.75E-09	2.67E-08	444	430	328	30	52	53	2.572955695	2.51339058	2.393210424	-0.59341205	-0.373880624	-0.802123454	Fam43b	ENSMUSG00000078235	625638	family with sequence similarity 43, member B
Hrh1	-3.080495132	0.00129162	0.002090653	121	85	40	1	14	23	0.706563853	0.189077839	-0.614607108	-4.803165618	-2.196656353	-1.96062884	Hrh1	ENSMUSG00000053004	15465	histamine receptor H1
Apc2	-3.080021338	1.46E-13	2.54E-11	7005	6094	4932	466	707	896	6.549481095	6.335033031	6.29997078	3.3346718	3.366441515	3.243307578	Apc2	ENSMUSG00000020135	23805	adenomatosis polyposis coli 2
Apol8	-3.079879	1.01E-11	3.93E-10	1923	1758	1603	132	231	247	4.68503265	4.542204312	4.679112228	1.520008343	1.756711219	1.389992626	Apol8	ENSMUSG00000056656	239552	apolipoprotein L 8
Olfml2a	-3.079691151	7.12E-10	9.30E-09	425	475	400	34	46	69	2.510012759	2.656641498	2.678812537	-0.416480596	-0.547300154	-0.429825908	Olfml2a	ENSMUSG00000046618	241327	olfactomedin-like 2A
Slc38a3	-3.078306078	2.04E-11	6.59E-10	1245	1125	1098	97	120	183	4.058253232	3.89868886	4.133583573	1.078102039	0.817449168	0.960056224	Slc38a3	ENSMUSG00000010064	76257	solute carrier family 38, member 3
Rcsd1	-3.078199502	5.10E-10	7.25E-09	792	804	673	46	96	133	3.406382968	3.414579512	3.42812075	0.012468547	0.498424149	0.503592028	Rcsd1	ENSMUSG00000040723	226594	RCSD domain containing 1
Evi2a	-3.077610972	1.02E-08	7.53E-08	320	275	230	19	33	42	2.101801341	1.870506327	1.882809021	-1.234591254	-1.014723174	-1.128401796	Evi2a	ENSMUSG00000078771	14017	ecotropic viral integration site 2a
Rapgef3	-3.075535701	1.13E-11	4.20E-10	2774	2600	2242	188	346	350	5.213397356	5.106496108	5.162896163	2.028073885	2.337574201	1.890534438	Rapgef3	ENSMUSG00000022469	223864	Rap guanine nucleotide exchange factor (GEF) 3
Gnal	-3.075434677	1.78E-09	1.89E-08	864	726	710	71	93	93	3.53175284	3.267559939	3.50523409	0.631485036	0.453088151	-0.006330349	Gnal	ENSMUSG00000024524	14680	guanine nucleotide binding protein, alpha stimulating, olfactory type
Arhgap40	-3.065813878	3.90E-07	1.51E-06	291	247	163	22	29	24	1.9652241	1.71622067	1.388328485	-1.029675411	-1.195438616	-1.902554351	Arhgap40	ENSMUSG00000074625	545481	Rho GTPase activating protein 40
Gprc5c	-3.063933057	1.44E-09	1.60E-08	931	811	791	80	75	141	3.639375224	3.427069343	3.660908009	0.802177636	0.146334855	0.587040915	Gprc5c	ENSMUSG00000051043	70355	G protein-coupled receptor, family C, group 5, member C
Tppp3	-3.063884536	1.98E-10	3.56E-09	1096	1183	1096	106	125	153	3.874522446	3.971146593	4.130955447	1.205285605	0.875877823	0.703807449	Tppp3	ENSMUSG00000014846	67971	tubulin polymerization-promoting protein family member 3
Nrip3	-3.062142729	3.14E-10	5.07E-09	1219	1257	1212	76	163	215	4.027831842	4.058604273	4.275985439	0.728795221	1.256217011	1.190981135	Nrip3	ENSMUSG00000034825	78593	nuclear receptor interacting protein 3
Slc38a8	-3.054096717	6.71E-06	1.79E-05	107	102	101	6	18	12	0.53080907	0.449114368	0.702607511	-2.796722105	-1.855106578	-2.827930519	Slc38a8	ENSMUSG00000034224	234788	solute carrier family 38, member 8
Rgag4	-3.050468461	1.67E-08	1.12E-07	746	785	735	40	110	142	3.320177295	3.38012316	3.555097952	-0.186122245	0.692974626	0.597140644	Rgag4	ENSMUSG00000049191	331474	retrotransposon gag domain containing 4
Gm3716	-3.041828452	3.30E-13	4.22E-11	2843	2848	2398	227	324	399	5.248830267	5.237881853	5.259904345	2.299170364	2.243071138	2.078889607	Gm3716	ENSMUSG00000105402	100042198	predicted gene 3716
Hapln4	-3.040747636	5.63E-10	7.78E-09	567	514	541	40	68	85	2.924997738	2.77023583	3.113607111	-0.186122245	0.006883078	-0.134163061	Hapln4	ENSMUSG00000007594	330790	hyaluronan and proteoglycan link protein 4
Hoxa4	-3.038705319	1.85E-05	4.39E-05	89	117	93	12	6	16	0.267940311	0.645128747	0.584637196	-1.869707915	-3.298979292	-2.449722497	Hoxa4	ENSMUSG00000000942	15401	homeobox A4
Robo3	-3.034477207	7.29E-11	1.65E-09	2169	2053	1867	199	230	278	4.85861362	4.765876528	4.898946658	2.109832001	1.750478584	1.5596946	Robo3	ENSMUSG00000032128	19649	roundabout guidance receptor 3
Lad1	-3.033914676	7.54E-05	0.000155084	105	64	79	11	9	6	0.50385765	-0.214429169	0.351677797	-1.988449026	-2.78283762	-3.689351105	Lad1	ENSMUSG00000041782	16763	ladinin
Prdm16	-3.030077906	1.83E-06	5.73E-06	172	126	112	7	19	24	1.210238557	0.751108025	0.850514186	-2.594808743	-1.781009857	-1.902554351	Prdm16	ENSMUSG00000039410	70673	PR domain containing 16
Kcnj4	-3.027221743	2.72E-14	9.39E-12	7638	7146	6513	556	902	1110	6.674272839	6.564742089	6.701057095	3.589098018	3.717429271	3.551879505	Kcnj4	ENSMUSG00000044216	16520	potassium inwardly-rectifying channel, subfamily J, member 4
Pamr1	-3.022494905	1.18E-05	2.94E-05	136	183	112	14	8	33	0.87377831	1.285731985	0.850514186	-1.658050119	-2.935247198	-1.464162917	Pamr1	ENSMUSG00000027188	210622	peptidase domain containing associated with muscle regeneration 1
Dram1	-3.014288993	6.54E-13	6.62E-11	3179	3346	2592	272	350	464	5.409932243	5.470289356	5.37209839	2.559395971	2.354110767	2.295946272	Dram1	ENSMUSG00000020057	71712	DNA-damage regulated autophagy modulator 1
Aqp5	-3.008878728	1.62E-06	5.15E-06	137	132	133	15	13	17	0.884265952	0.817668888	1.096646803	-1.56283076	-2.296366073	-2.368857708	Aqp5	ENSMUSG00000044217	11830	aquaporin 5
Npnt	-3.008379191	3.11E-12	1.72E-10	2784	2906	2433	216	372	397	5.218586797	5.266956575	5.280801316	2.227721322	2.441821499	2.071664294	Npnt	ENSMUSG00000040998	114249	nephronectin
Slc35d2	-2.999828676	1.69E-09	1.81E-08	552	572	481	35	66	105	2.886390563	2.924178118	2.944310603	-0.375441787	-0.035567979	0.166403023	Slc35d2	ENSMUSG00000033114	70484	solute carrier family 35, member D2
AI661453	-2.999059299	5.90E-08	3.09E-07	721	619	538	57	101	67	3.271072037	3.037897451	3.105597886	0.317872081	0.570955092	-0.471437693	AI661453	ENSMUSG00000034382	224833	expressed sequence AI661453
Cdh26	-2.983984688	0.000103785	0.000207515	122	116	97	21	11	8	0.718335059	0.632857938	0.644827833	-1.094799501	-2.519193702	-3.34194003	Cdh26	ENSMUSG00000039155	381409	cadherin-like 26
Sag	-2.972847474	3.56E-08	2.04E-07	272	301	258	20	43	40	1.868178011	2.000354209	2.047943279	-1.163002877	-0.642510346	-1.196553701	Sag	ENSMUSG00000056055	20215	S-antigen, retina and pineal gland (arrestin)
Mturn	-2.972614888	9.12E-09	6.88E-08	1022	960	905	55	141	197	3.773770967	3.67010621	3.854944085	0.266939256	1.048377653	1.06565969	Mturn	ENSMUSG00000038065	68235	maturin, neural progenitor differentiation regulator homolog (Xenopus)
Wfikkn2	-2.96737791	1.49E-07	6.73E-07	216	303	172	15	27	45	1.53705669	2.00987472	1.465455561	-1.56283076	-1.295061236	-1.031854761	Wfikkn2	ENSMUSG00000044177	278507	WAP, follistatin/kazal, immunoglobulin, kunitz and netrin domain containing 2
Dmrtb1	-2.961664849	0.000205471	0.000385475	86	64	67	10	3	15	0.21906498	-0.214429169	0.11685861	-2.117846781	-4.11026294	-2.535390406	Dmrtb1	ENSMUSG00000028610	56296	DMRT-like family B with proline-rich C-terminal, 1
Atp6v0a4	-2.958747156	1.23E-08	8.77E-08	287	319	272	25	40	42	1.945328799	2.083858217	2.123923866	-0.850278119	-0.744450671	-1.128401796	Atp6v0a4	ENSMUSG00000038600	140494	ATPase, H+ transporting, lysosomal V0 subunit A4
Tdrp	-2.949019821	2.70E-05	6.15E-05	90	77	94	7	6	22	0.283870934	0.048339103	0.599921914	-2.594808743	-3.298979292	-2.021139478	Tdrp	ENSMUSG00000050052	72148	testis development related protein
Slc37a2	-2.948545205	1.22E-13	2.33E-11	4083	4011	3723	343	508	644	5.770882113	5.731737266	5.894348022	2.893278364	2.890337662	2.76771576	Slc37a2	ENSMUSG00000032122	56857	solute carrier family 37 (glycerol-3-phosphate transporter), member 2
Zfp750	-2.947817558	5.27E-12	2.44E-10	1968	1934	1476	145	249	285	4.718385899	4.679777023	4.560099324	1.65488279	1.864525833	1.595400951	Zfp750	ENSMUSG00000039238	319530	zinc finger protein 750
Msx3	-2.947757173	4.63E-07	1.74E-06	145	190	132	10	21	28	0.96553053	1.339578171	1.085831051	-2.117846781	-1.643340287	-1.691144701	Msx3	ENSMUSG00000025469	17703	msh homeobox 3
Syt17	-2.936345449	1.21E-09	1.39E-08	718	650	603	58	97	92	3.265065488	3.1082788	3.269893156	0.342679689	0.51322499	-0.021703581	Syt17	ENSMUSG00000058420	110058	synaptotagmin XVII
Alox5	-2.928848349	3.66E-05	8.09E-05	97	122	107	13	6	25	0.390715928	0.704964432	0.785157023	-1.760000954	-3.298979292	-1.846727419	Alox5	ENSMUSG00000025701	11689	arachidonate 5-lipoxygenase
Nme4	-2.92489691	5.10E-14	1.50E-11	4477	4371	4031	379	529	761	5.903751847	5.855706929	6.008993874	3.037005715	2.948667206	3.008088998	Nme4	ENSMUSG00000024177	56520	NME/NM23 nucleoside diphosphate kinase 4
Rab42	-2.924317154	3.08E-06	9.04E-06	203	178	199	26	24	20	1.447957076	1.246001573	1.674808616	-0.795115714	-1.458716487	-2.150351998	Rab42	ENSMUSG00000089687	242681	RAB42, member RAS oncogene family
Dlx4	-2.923611746	0.003603625	0.005418911	84	96	63	25	11	2	0.18553661	0.362589032	0.029248271	-0.850278119	-2.519193702	-4.823989504	Dlx4	ENSMUSG00000020871	13394	distal-less homeobox 4
Atg9b	-2.922439215	2.87E-11	8.41E-10	6723	6044	4384	573	686	882	6.490210367	6.323149291	6.130078277	3.632497772	3.323000678	3.220621838	Atg9b	ENSMUSG00000038295	213948	autophagy related 9B
Gli1	-2.918218855	1.02E-05	2.59E-05	220	274	245	41	17	38	1.563400553	1.865271047	1.973616794	-0.151066877	-1.933215921	-1.268085372	Gli1	ENSMUSG00000025407	14632	GLI-Kruppel family member GLI1
Jakmip3	-2.917723485	1.09E-06	3.64E-06	227	156	109	11	19	32	1.608375577	1.056887844	0.811656232	-1.988449026	-1.781009857	-1.50679192	Jakmip3	NA	74004	janus kinase and microtubule interacting protein 3
Mcam	-2.917292281	1.47E-14	7.75E-12	10335	10548	9505	923	1235	1791	7.110492061	7.126433952	7.246359518	4.319666809	4.170321007	4.24142087	Mcam	ENSMUSG00000032135	84004	melanoma cell adhesion molecule
Mgst2	-2.914380581	5.87E-06	1.59E-05	113	137	121	15	16	13	0.608767987	0.87088262	0.96117725	-1.56283076	-2.015797488	-2.723685638	Mgst2	ENSMUSG00000074604	211666	microsomal glutathione S-transferase 2
Slc38a4	-2.914359303	9.14E-14	2.04E-11	7759	8001	6386	650	1023	1181	6.696945518	6.727763376	6.672651337	3.814206671	3.898851868	3.641223782	Slc38a4	ENSMUSG00000022464	69354	solute carrier family 38, member 4
Psca	-2.911693605	4.90E-06	1.36E-05	96	119	128	13	11	17	0.375928336	0.669361628	1.041738488	-1.760000954	-2.519193702	-2.368857708	Psca	ENSMUSG00000022598	72373	prostate stem cell antigen
Lama3	-2.911107702	4.35E-09	3.86E-08	584	603	439	53	53	106	2.967538854	3.000182224	2.812749245	0.214142289	-0.346900822	0.179905749	Lama3	ENSMUSG00000024421	16774	laminin, alpha 3
Kank3	-2.910703693	1.06E-13	2.10E-11	3678	3691	3091	309	470	575	5.620215336	5.611820458	5.626026475	2.742979976	2.778393282	2.604577933	Kank3	ENSMUSG00000042099	80880	KN motif and ankyrin repeat domains 3
Gjb5	-2.908245721	3.35E-09	3.14E-08	862	888	713	91	107	110	3.528413507	3.557761953	3.511309552	0.986623431	0.653437129	0.232687288	Gjb5	ENSMUSG00000042357	14622	gap junction protein, beta 5
Stra6	-2.902220819	2.21E-08	1.39E-07	314	240	238	22	35	44	2.074585183	1.674925861	1.931950014	-1.029675411	-0.932201353	-1.063324636	Stra6	ENSMUSG00000032327	20897	stimulated by retinoic acid gene 6
Pltp	-2.900806885	2.36E-14	9.39E-12	9536	9130	8256	832	1171	1504	6.994422233	6.918174011	7.043136272	4.170031887	4.093613222	3.989666752	Pltp	ENSMUSG00000017754	18830	phospholipid transfer protein
Dnah6	-2.900252362	5.00E-07	1.86E-06	193	191	152	16	29	22	1.375467186	1.347109011	1.288094041	-1.473508754	-1.195438616	-2.021139478	Dnah6	ENSMUSG00000052861	330355	dynein, axonemal, heavy chain 6
Mlf1	-2.897533106	1.42E-09	1.58E-08	499	514	454	36	71	90	2.741056332	2.77023583	2.861124273	-0.335538148	0.068305663	-0.052950396	Mlf1	ENSMUSG00000048416	17349	myeloid leukemia factor 1
Igdcc4	-2.895721011	5.08E-11	1.28E-09	1295	1194	1165	122	150	200	4.115012111	3.984487323	4.218968353	1.406936912	1.13705059	1.087317252	Igdcc4	ENSMUSG00000032816	56741	immunoglobulin superfamily, DCC subclass, member 4
Prss22	-2.894509003	3.95E-08	2.22E-07	439	438	307	35	65	51	2.556656168	2.539919258	2.298019978	-0.375441787	-0.057271304	-0.856218514	Prss22	ENSMUSG00000045027	70835	protease, serine 22
5830418P13Rik	-2.891189799	5.79E-05	0.000122313	153	138	101	21	7	25	1.042460678	0.881293822	0.702607511	-1.094799501	-3.105680466	-1.846727419	5830418P13Rik	ENSMUSG00000086236	100529079	RIKEN cDNA 5830418P13 gene
Dnaic2	-2.888128779	1.92E-07	8.32E-07	316	284	261	17	39	69	2.083714402	1.916788095	2.064565079	-1.389396011	-0.780096843	-0.429825908	Dnaic2	ENSMUSG00000034706	432611	dynein, axonemal, intermediate chain 2
Wnt10a	-2.885204565	6.91E-09	5.55E-08	678	713	627	45	115	120	3.182492625	3.241531251	3.326119304	-0.018789082	0.756553926	0.356764641	Wnt10a	ENSMUSG00000026167	22409	wingless-type MMTV integration site family, member 10A
Plekhg6	-2.880238689	3.53E-09	3.28E-08	830	727	599	79	73	130	3.473905418	3.269542829	3.260305339	0.784178986	0.107847728	0.471010804	Plekhg6	ENSMUSG00000038167	213522	pleckstrin homology domain containing, family G (with RhoGef domain) member 6
Smpdl3b	-2.880175782	5.01E-15	4.28E-12	8776	8793	7980	756	1116	1553	6.874615436	6.863921111	6.99408742	4.031948987	4.024268305	4.035879328	Smpdl3b	ENSMUSG00000028885	100340	sphingomyelin phosphodiesterase, acid-like 3B
Baiap2l2	-2.877754576	3.99E-05	8.76E-05	83	48	70	5	8	11	0.168475623	-0.621565876	0.179242596	-3.031565593	-2.935247198	-2.940298592	Baiap2l2	ENSMUSG00000018126	207495	BAI1-associated protein 2-like 2
D730001G18Rik	-2.873536723	4.38E-05	9.52E-05	121	103	79	5	10	34	0.706563853	0.463043866	0.351677797	-3.031565593	-2.645001603	-1.422757456	D730001G18Rik	ENSMUSG00000101026	78725	RIKEN cDNA D730001G18 gene
Adgrb1	-2.865548277	1.69E-08	1.13E-07	308	310	234	21	39	56	2.046845709	2.042710286	1.907588737	-1.094799501	-0.780096843	-0.724603757	Adgrb1	ENSMUSG00000034730	107831	adhesion G protein-coupled receptor B1
Rsph4a	-2.865533373	6.40E-05	0.000133799	64	85	72	5	16	8	-0.201162782	0.189077839	0.219381952	-3.031565593	-2.015797488	-3.34194003	Rsph4a	ENSMUSG00000039552	212892	radial spoke head 4 homolog A (Chlamydomonas)
R3hdml	-2.86456265	1.02E-05	2.59E-05	74	90	80	6	9	17	0.005104657	0.270541399	0.369624462	-2.796722105	-2.78283762	-2.368857708	R3hdml	ENSMUSG00000078949	100043899	R3H domain containing-like
Celf5	-2.860849874	5.46E-12	2.50E-10	3991	3522	2931	335	491	553	5.738011473	5.54422373	5.549368431	2.859296726	2.841327844	2.548429442	Celf5	ENSMUSG00000034818	319586	CUGBP, Elav-like family member 5
Jam2	-2.860783568	7.80E-06	2.04E-05	87	112	75	10	10	13	0.23554142	0.582703596	0.277571665	-2.117846781	-2.645001603	-2.723685638	Jam2	ENSMUSG00000053062	67374	junction adhesion molecule 2
Map3k9	-2.86015201	1.02E-07	4.89E-07	397	370	211	32	45	45	2.411942539	2.297160876	1.758918247	-0.502235672	-0.578343935	-1.031854761	Map3k9	ENSMUSG00000042724	338372	mitogen-activated protein kinase kinase kinase 9
Mcf2l	-2.859351031	7.57E-12	3.16E-10	2992	3260	2593	306	385	475	5.322499515	5.432736065	5.372654687	2.728934789	2.49125001	2.329652375	Mcf2l	ENSMUSG00000031442	17207	mcf.2 transforming sequence-like
Btc	-2.859224543	1.62E-09	1.75E-08	452	406	381	36	51	81	2.598657858	2.430745717	2.608763061	-0.335538148	-0.401374606	-0.202594239	Btc	ENSMUSG00000082361	12223	betacellulin, epidermal growth factor family member
Pgf	-2.855900404	1.96E-08	1.26E-07	445	398	389	28	56	94	2.576193618	2.402110787	2.638673152	-0.690741717	-0.268862733	0.008880794	Pgf	ENSMUSG00000004791	18654	placental growth factor
Ccdc155	-2.851397004	1.66E-06	5.26E-06	178	133	121	14	13	31	1.25940877	0.828469816	0.96117725	-1.658050119	-2.296366073	-1.550718985	Ccdc155	ENSMUSG00000038292	384619	coiled-coil domain containing 155
2610027K06Rik	-2.850222931	7.56E-06	1.99E-05	112	107	101	6	14	27	0.59606388	0.517454675	0.702607511	-2.796722105	-2.196656353	-1.741164269	2610027K06Rik	ENSMUSG00000087013	69909	RIKEN cDNA 2610027K06 gene
Arap3	-2.848929229	4.61E-07	1.73E-06	193	241	143	21	25	26	1.375467186	1.680897981	1.200565706	-1.094799501	-1.40207677	-1.792980542	Arap3	ENSMUSG00000024451	106952	ArfGAP with RhoGAP domain, ankyrin repeat and PH domain 3
Kcnj2	-2.847742674	3.64E-06	1.05E-05	121	135	148	8	18	33	0.706563853	0.84983207	1.249846587	-2.417716017	-1.855106578	-1.464162917	Kcnj2	ENSMUSG00000041695	16518	potassium inwardly-rectifying channel, subfamily J, member 2
Robo2	-2.846877304	1.96E-06	6.09E-06	104	110	97	9	13	18	0.49019075	0.556957056	0.644827833	-2.260004274	-2.296366073	-2.292285925	Robo2	ENSMUSG00000052516	268902	roundabout guidance receptor 2
Hoxb8	-2.844254283	8.53E-06	2.21E-05	75	103	70	7	10	14	0.02419779	0.463043866	0.179242596	-2.594808743	-2.645001603	-2.62646825	Hoxb8	ENSMUSG00000056648	15416	homeobox B8
Cd40	-2.844101783	3.42E-06	9.90E-06	153	138	127	8	18	37	1.042460678	0.881293822	1.030501522	-2.417716017	-1.855106578	-1.305226731	Cd40	ENSMUSG00000017652	21939	CD40 antigen
Slc4a11	-2.839844615	9.80E-13	8.74E-11	8742	8272	6521	750	1140	1276	6.869015967	6.775812905	6.702827846	4.020463366	4.054938598	3.752720909	Slc4a11	ENSMUSG00000074796	269356	solute carrier family 4, sodium bicarbonate transporter-like, member 11
Gas1	-2.838715037	7.74E-14	1.89E-11	26009	22580	21626	2209	3254	4104	8.441875266	8.224431837	8.432292212	5.57806034	5.567318118	5.437075747	Gas1	ENSMUSG00000052957	14451	growth arrest specific 1
Gna15	-2.831626786	1.71E-11	5.72E-10	1630	1735	1631	170	211	300	4.44668899	4.523216559	4.704080857	1.883407667	1.62663584	1.66906254	Gna15	ENSMUSG00000034792	14676	guanine nucleotide binding protein, alpha 15
Ppp1r14a	-2.827698499	7.76E-08	3.88E-07	860	824	804	104	126	101	3.525066426	3.449981719	3.684399629	1.177975703	0.887284867	0.111091707	Ppp1r14a	ENSMUSG00000037166	68458	protein phosphatase 1, regulatory (inhibitor) subunit 14A
Rundc3a	-2.823430334	5.06E-06	1.40E-05	109	135	123	8	14	33	0.557266221	0.84983207	0.984657422	-2.417716017	-2.196656353	-1.464162917	Rundc3a	ENSMUSG00000006575	51799	RUN domain containing 3A
Mmp15	-2.822193861	2.15E-13	3.10E-11	13924	12611	11958	1275	1787	2214	7.540489181	7.384123172	7.577549426	4.785478261	4.702998114	4.547103821	Mmp15	ENSMUSG00000031790	17388	matrix metallopeptidase 15
Sec14l5	-2.821949149	1.02E-10	2.17E-09	1772	1538	1250	117	230	301	4.567120349	4.349450504	4.32049169	1.346894387	1.750478584	1.673842125	Sec14l5	ENSMUSG00000091712	665119	SEC14-like lipid binding 5
Lzts1	-2.814378466	1.93E-05	4.54E-05	129	118	108	15	8	28	0.798149203	0.657296067	0.798467468	-1.56283076	-2.935247198	-1.691144701	Lzts1	ENSMUSG00000036306	211134	leucine zipper, putative tumor suppressor 1
Tulp2	-2.807841817	9.85E-08	4.74E-07	268	279	168	18	34	47	1.846888107	1.891259511	1.431684837	-1.309918261	-0.972872316	-0.970902418	Tulp2	ENSMUSG00000023467	56734	tubby-like protein 2
Krt13	-2.806683614	1.78E-12	1.22E-10	2402	2368	2121	227	330	397	5.005751227	4.971711819	5.082887126	2.299170364	2.269464672	2.071664294	Krt13	ENSMUSG00000044041	16663	keratin 13
Wdr78	-2.802382886	5.15E-08	2.76E-07	321	279	264	21	49	54	2.106287867	1.891259511	2.080997552	-1.094799501	-0.457986214	-0.775818015	Wdr78	ENSMUSG00000035126	242584	WD repeat domain 78
C730036E19Rik	-2.801743542	0.00021665	0.00040471	92	52	70	6	17	6	0.315213967	-0.508515067	0.179242596	-2.796722105	-1.933215921	-3.689351105	C730036E19Rik	NA	402734	RIKEN cDNA C730036E19 gene
Meox1	-2.799254871	1.10E-07	5.21E-07	269	417	338	34	36	74	1.852240109	2.469213148	2.436422483	-0.416480596	-0.892645578	-0.330762699	Meox1	ENSMUSG00000001493	17285	mesenchyme homeobox 1
Slfn10-ps	-2.798811518	1.66E-05	3.98E-05	171	98	96	12	22	13	1.201878091	0.392011188	0.630013959	-1.869707915	-1.579137762	-2.723685638	Slfn10-ps	ENSMUSG00000072621	237887	schlafen 10, pseudogene
Rhpn1	-2.798196174	1.79E-11	5.95E-10	1326	1293	1132	127	178	214	4.14911315	4.099307671	4.177544423	1.464580093	1.38249943	1.184297199	Rhpn1	ENSMUSG00000022580	14787	rhophilin, Rho GTPase binding protein 1
Ptpn7	-2.797064601	3.59E-08	2.05E-07	774	807	737	49	140	166	3.373261033	3.419945542	3.559013592	0.102372519	1.038180063	0.820473783	Ptpn7	ENSMUSG00000031506	320139	protein tyrosine phosphatase, non-receptor type 7
Plekhg1	-2.79705068	6.30E-10	8.52E-09	807	872	638	59	117	161	3.4334153	3.53156233	3.351175069	0.367067924	0.781221313	0.776711422	Plekhg1	ENSMUSG00000040624	213783	pleckstrin homology domain containing, family G (with RhoGef domain) member 1
Foxo6	-2.796635669	4.04E-08	2.27E-07	397	396	346	37	67	53	2.411942539	2.394862359	2.470083771	-0.296708567	-0.014186317	-0.802123454	Foxo6	ENSMUSG00000052135	329934	forkhead box O6
9530053A07Rik	-2.787736228	1.32E-10	2.64E-09	2292	2583	2252	240	382	373	4.93815272	5.097036041	5.169314173	2.379287008	2.479992814	1.982014429	9530053A07Rik	ENSMUSG00000078776	319482	RIKEN cDNA 9530053A07 gene
Fam89a	-2.785057338	8.98E-08	4.39E-07	306	262	272	30	29	61	2.037479413	1.800919462	2.123923866	-0.59341205	-1.195438616	-0.603998608	Fam89a	ENSMUSG00000043068	69627	family with sequence similarity 89, member A
Mmp24	-2.784467577	2.01E-06	6.21E-06	256	252	197	14	53	41	1.781065826	1.745009657	1.66030095	-1.658050119	-0.346900822	-1.162075355	Mmp24	ENSMUSG00000027612	17391	matrix metallopeptidase 24
Baiap3	-2.782247501	1.98E-08	1.27E-07	287	279	250	22	42	53	1.945328799	1.891259511	2.002658821	-1.029675411	-0.675696506	-0.802123454	Baiap3	ENSMUSG00000047507	545192	BAI1-associated protein 3
Ccdc88b	-2.782046845	1.70E-12	1.20E-10	2975	3062	2646	269	454	513	5.314281933	5.34236905	5.401835639	2.543434248	2.728530043	2.440381798	Ccdc88b	ENSMUSG00000047810	78317	coiled-coil domain containing 88B
Btla	-2.781984664	8.63E-07	2.99E-06	141	154	124	11	17	33	0.925470352	1.038400035	0.996255741	-1.988449026	-1.933215921	-1.464162917	Btla	ENSMUSG00000052013	208154	B and T lymphocyte associated
Gpr20	-2.774993953	0.000413417	0.000730043	89	87	107	5	7	49	0.267940311	0.222217268	0.785157023	-3.031565593	-3.105680466	-0.912421197	Gpr20	ENSMUSG00000045281	239530	G protein-coupled receptor 20
Nxph3	-2.768370473	5.77E-08	3.03E-07	239	319	285	23	45	53	1.682356535	2.083858217	2.191064747	-0.967364529	-0.578343935	-0.802123454	Nxph3	ENSMUSG00000046719	104079	neurexophilin 3
Cacna1i	-2.768080926	2.74E-06	8.15E-06	310	203	199	25	46	27	2.056151588	1.434540033	1.674808616	-0.850278119	-0.547300154	-1.741164269	Cacna1i	ENSMUSG00000022416	239556	calcium channel, voltage-dependent, alpha 1I subunit
Prex2	-2.767529076	0.000185635	0.000351593	108	86	63	3	16	25	0.544098293	0.205742705	0.029248271	-3.660973051	-2.015797488	-1.846727419	Prex2	ENSMUSG00000048960	109294	phosphatidylinositol-3,4,5-trisphosphate-dependent Rac exchange factor 2
Rab7b	-2.766783441	1.92E-06	5.99E-06	294	393	310	19	75	64	1.979967569	2.383920974	2.312009227	-1.234591254	0.146334855	-0.536196154	Rab7b	ENSMUSG00000052688	226421	RAB7B, member RAS oncogene family
Cd14	-2.764599101	1.92E-12	1.25E-10	5324	5338	4358	532	618	1018	6.153675665	6.143978773	6.12149842	3.525516169	3.172624154	3.427215233	Cd14	ENSMUSG00000051439	12475	CD14 antigen
Duox2	-2.763733126	2.07E-06	6.37E-06	121	113	96	9	14	24	0.706563853	0.595406587	0.630013959	-2.260004274	-2.196656353	-1.902554351	Duox1	ENSMUSG00000033268	99439	dual oxidase 1
Mc1r	-2.757509376	4.08E-08	2.29E-07	254	270	247	28	37	42	1.769797444	1.844137855	1.985303853	-0.690741717	-0.854145463	-1.128401796	Mc1r	ENSMUSG00000074037	17199	melanocortin 1 receptor
Itgb2	-2.750634762	2.13E-08	1.35E-07	478	453	404	42	49	114	2.67916174	2.588382797	2.693136155	-0.116843135	-0.457986214	0.283605755	Itgb2	ENSMUSG00000000290	16414	integrin beta 2
Lipe	-2.747857663	1.41E-10	2.79E-09	1236	1102	1024	101	189	202	4.047795187	3.868916747	4.033005571	1.136016364	1.468551064	1.101577088	Lipe	ENSMUSG00000003123	16890	lipase, hormone sensitive
Rimbp3	-2.747268682	0.000316428	0.00057433	222	172	118	5	41	53	1.576394263	1.196834145	0.92522454	-3.031565593	-0.709664052	-0.802123454	Rimbp3	ENSMUSG00000071636	239731	RIMS binding protein 3
Mctp2	-2.741475803	7.36E-05	0.000151829	89	99	64	14	10	9	0.267940311	0.40650027	0.051654662	-1.658050119	-2.645001603	-3.195280444	Mctp2	ENSMUSG00000032776	244049	multiple C2 domains, transmembrane 2
Rhbdl2	-2.740340532	2.13E-09	2.17E-08	621	862	670	80	96	130	3.05600771	3.514942614	3.421683862	0.802177636	0.498424149	0.471010804	Rhbdl2	ENSMUSG00000043333	230726	rhomboid, veinlet-like 2 (Drosophila)
Rgcc	-2.739132822	1.24E-12	9.97E-11	2742	2943	2527	263	432	510	5.196664583	5.285202726	5.335471059	2.510971036	2.657026448	2.431942419	Rgcc	ENSMUSG00000022018	66214	regulator of cell cycle
Col8a1	-2.738744113	1.03E-11	3.96E-10	2352	2243	1903	216	350	377	4.97541669	4.893508739	4.926487303	2.227721322	2.354110767	1.997348303	Col8a1	ENSMUSG00000068196	12837	collagen, type VIII, alpha 1
Notch4	-2.738631135	5.91E-10	8.05E-09	499	560	444	50	73	94	2.741056332	2.893647628	2.829055149	0.131137182	0.107847728	0.008880794	Notch4	ENSMUSG00000015468	18132	notch 4
Gcnt1	-2.737813453	1.26E-07	5.84E-07	374	432	301	45	59	50	2.326078495	2.520068622	2.269627839	-0.018789082	-0.194830132	-0.884046189	Gcnt1	ENSMUSG00000038843	14537	glucosaminyl (N-acetyl) transferase 1, core 2
1500009L16Rik	-2.735648038	5.36E-09	4.56E-08	733	772	807	95	94	144	3.294851237	3.356064485	3.689766878	1.048249057	0.468358994	0.617130434	1500009L16Rik	ENSMUSG00000087651	69784	RIKEN cDNA 1500009L16 gene
Inpp5d	-2.732709083	3.01E-10	4.92E-09	727	730	619	73	106	120	3.283010629	3.275475199	3.307619668	0.671200151	0.640013455	0.356764641	Inpp5d	ENSMUSG00000026288	16331	inositol polyphosphate-5-phosphatase D
Fbn2	-2.728898218	4.48E-07	1.69E-06	280	254	180	30	35	33	1.909837858	1.7563663	1.530714177	-0.59341205	-0.932201353	-1.464162917	Fbn2	ENSMUSG00000024598	14119	fibrillin 2
Golga7b	-2.728552801	1.49E-06	4.78E-06	170	140	168	11	25	38	1.193468893	0.901893505	1.431684837	-1.988449026	-1.40207677	-1.268085372	Golga7b	ENSMUSG00000042532	71146	golgi autoantigen, golgin subfamily a, 7B
Sectm1a	-2.721446349	9.68E-06	2.47E-05	105	85	78	10	13	13	0.50385765	0.189077839	0.333505065	-2.117846781	-2.296366073	-2.723685638	Sectm1a	ENSMUSG00000025165	209588	secreted and transmembrane 1A
Asic1	-2.721149758	1.49E-05	3.63E-05	446	382	286	65	26	81	2.579424291	2.343077308	2.19610229	0.505325816	-1.347576962	-0.202594239	Asic1	ENSMUSG00000023017	11419	acid-sensing (proton-gated) ion channel 1
Ccdc153	-2.719728336	5.40E-10	7.52E-09	708	757	700	74	117	126	3.244861101	3.327796579	3.48479576	0.690655108	0.781221313	0.426392012	Ccdc153	ENSMUSG00000070306	270150	coiled-coil domain containing 153
Pfn2	-2.718728402	2.24E-14	9.39E-12	5728	6030	4877	549	778	1173	6.259176292	6.319804226	6.283794885	3.570840988	3.50432018	3.631429028	Pfn2	ENSMUSG00000027805	18645	profilin 2
Crip2	-2.717649909	1.38E-14	7.59E-12	7477	7059	6337	712	1003	1397	6.643541771	6.547072664	6.661540352	3.945517378	3.870394712	3.883292969	Crip2	ENSMUSG00000006356	68337	cysteine rich protein 2
Add2	-2.715289148	1.01E-12	8.82E-11	3164	3078	2734	269	465	636	5.40311111	5.349885375	5.449020225	2.543434248	2.762995346	2.749719672	Add2	ENSMUSG00000030000	11519	adducin 2 (beta)
Ccnd1	-2.714335748	7.23E-15	5.27E-12	26071	26407	21480	2393	3906	4760	8.445310116	8.450296837	8.422519763	5.693454345	5.830723701	5.650941425	Ccnd1	ENSMUSG00000070348	12443	cyclin D1
Enho	-2.713731654	3.32E-10	5.30E-09	1125	1020	1048	106	180	187	3.912163646	3.757474387	4.066399916	1.205285605	1.398531792	0.991025589	Enho	ENSMUSG00000028445	69638	energy homeostasis associated
Rhov	-2.713480216	4.56E-07	1.72E-06	344	328	300	37	30	87	2.205805012	2.123865016	2.264841013	-0.296708567	-1.148093636	-0.101127403	Rhov	ENSMUSG00000034226	228543	ras homolog family member V
Rassf4	-2.712603145	7.38E-06	1.95E-05	212	149	111	9	29	36	1.510222821	0.991116653	0.837677475	-2.260004274	-1.195438616	-1.343349597	Rassf4	ENSMUSG00000042129	213391	Ras association (RalGDS/AF-6) domain family member 4
Tmem38a	-2.707681147	5.11E-13	5.58E-11	4708	4652	4278	422	734	920	5.976317061	5.94557328	6.094774208	3.191796536	3.420438297	3.281386274	Tmem38a	ENSMUSG00000031791	74166	transmembrane protein 38A
Csf2ra	-2.699937979	8.63E-05	0.00017567	140	130	123	26	19	12	0.915279053	0.795821374	0.984657422	-0.795115714	-1.781009857	-2.827930519	Csf2ra	ENSMUSG00000059326	12982	colony stimulating factor 2 receptor, alpha, low-affinity (granulocyte-macrophage)
Ndnf	-2.699584026	8.26E-09	6.39E-08	375	408	339	44	53	66	2.329919926	2.437816518	2.440673346	-0.05073897	-0.346900822	-0.492702495	Ndnf	ENSMUSG00000049001	68169	neuron-derived neurotrophic factor
Ptprv	-2.696590967	8.94E-12	3.58E-10	1344	1320	1066	132	184	240	4.168550049	4.129098879	4.090947991	1.520008343	1.430071725	1.348743948	Ptprv	NA	13924	protein tyrosine phosphatase, receptor type, V
Samd10	-2.695322021	2.19E-07	9.29E-07	328	285	255	41	35	49	2.137308849	1.921840048	2.031127739	-0.151066877	-0.932201353	-0.912421197	Samd10	ENSMUSG00000038605	229011	sterile alpha motif domain containing 10
Synpo2	-2.691882798	1.66E-09	1.79E-08	441	454	349	39	61	89	2.563198094	2.591556542	2.482506989	-0.222050665	-0.147504793	-0.06883131	Synpo2	ENSMUSG00000050315	118449	synaptopodin 2
Kndc1	-2.688990668	0.000122543	0.000241109	103	102	73	5	28	14	0.476393142	0.449114368	0.23904046	-3.031565593	-1.24439019	-2.62646825	Kndc1	ENSMUSG00000066129	76484	kinase non-catalytic C-lobe domain (KIND) containing 1
Dkk3	-2.686352508	2.22E-08	1.39E-07	363	381	393	44	46	82	2.283133561	2.339306265	2.65339883	-0.05073897	-0.547300154	-0.185179745	Dkk3	ENSMUSG00000030772	50781	dickkopf WNT signaling pathway inhibitor 3
Ngfr	-2.685669153	1.21E-05	3.01E-05	112	131	138	17	11	30	0.59606388	0.806786486	1.149541726	-1.389396011	-2.519193702	-1.596025654	Ngfr	ENSMUSG00000000120	18053	nerve growth factor receptor (TNFR superfamily, member 16)
Anks1b	-2.680848207	4.32E-07	1.64E-06	471	446	342	57	39	100	2.657925715	2.565968914	2.453351299	0.317872081	-0.780096843	0.096926068	Anks1b	ENSMUSG00000058589	77531	ankyrin repeat and sterile alpha motif domain containing 1B
Axin2	-2.676004694	2.72E-05	6.20E-05	443	388	408	64	27	126	2.569710489	2.365498888	2.70731896	0.483183478	-1.295061236	0.426392012	Axin2	ENSMUSG00000000142	12006	axin 2
Mtfp1	-2.673509143	7.96E-10	1.01E-08	558	641	546	54	86	134	2.901957628	3.088196791	3.126857794	0.240782279	0.341411556	0.514290951	Mtfp1	ENSMUSG00000004748	67900	mitochondrial fission process 1
Lrba	-2.667712516	1.44E-12	1.08E-10	3713	3571	2661	327	480	742	5.633875246	5.564150931	5.409988357	2.824495326	2.808704727	2.971676931	Lrba	ENSMUSG00000028080	80877	LPS-responsive beige-like anchor
Ramp3	-2.66747983	3.97E-10	6.07E-09	695	721	675	74	114	130	3.218165137	3.257604401	3.432396109	0.690655108	0.744060246	0.471010804	Ramp3	ENSMUSG00000041046	56089	receptor (calcitonin) activity modifying protein 3
Spon2	-2.667422747	2.00E-10	3.60E-09	1230	1190	1182	144	166	237	4.040780801	3.97965041	4.239852612	1.644943876	1.282373297	1.330698409	Spon2	ENSMUSG00000037379	100689	spondin 2, extracellular matrix protein
2210406O10Rik	-2.666311213	3.20E-06	9.34E-06	266	316	291	34	25	90	1.836124167	2.070272224	2.221029484	-0.416480596	-1.40207677	-0.052950396	2210406O10Rik	ENSMUSG00000039563	76710	RIKEN cDNA 2210406O10 gene
Pcdhgc4	-2.664892937	1.45E-07	6.57E-07	275	227	204	29	35	39	1.883941764	1.594951112	1.710452074	-0.641256261	-0.932201353	-1.231876247	Pcdhgc4	ENSMUSG00000023036	93707	protocadherin gamma subfamily C, 4
Gstt2	-2.656786563	0.000154066	0.000296997	106	106	85	21	7	18	0.517396295	0.504043144	0.45615436	-1.094799501	-3.105680466	-2.292285925	Gstt2	ENSMUSG00000033318	14872	glutathione S-transferase, theta 2
Mlc1	-2.655062227	9.32E-06	2.39E-05	110	102	79	11	10	23	0.570315048	0.449114368	0.351677797	-1.988449026	-2.645001603	-1.96062884	Mlc1	ENSMUSG00000035805	170790	megalencephalic leukoencephalopathy with subcortical cysts 1 homolog (human)
Plat	-2.654417452	1.95E-15	4.28E-12	16726	16737	14532	1710	2374	3414	7.804989497	7.792451219	7.858787585	5.208788374	5.112583935	5.171603636	Plat	ENSMUSG00000031538	18791	plasminogen activator, tissue
Cdkn1c	-2.652727011	5.87E-10	8.01E-09	786	900	764	90	138	146	3.395426598	3.577104084	3.610860186	0.970796747	1.017566059	0.636847029	Cdkn1c	ENSMUSG00000037664	12577	cyclin-dependent kinase inhibitor 1C (P57)
Tom1l1	-2.650669305	1.81E-08	1.19E-07	331	428	294	35	61	64	2.150402049	2.506681482	2.235781651	-0.375441787	-0.147504793	-0.536196154	Tom1l1	ENSMUSG00000020541	71943	target of myb1-like 1 (chicken)
Ampd3	-2.644388809	1.04E-10	2.20E-09	1535	1486	1177	172	199	270	4.360113818	4.29986428	4.233741503	1.900216923	1.542561248	1.517775003	Ampd3	ENSMUSG00000005686	11717	adenosine monophosphate deaminase 3
Epha1	-2.639409061	6.31E-06	1.70E-05	94	114	104	8	19	22	0.345890516	0.607998704	0.744472611	-2.417716017	-1.781009857	-2.021139478	Epha1	ENSMUSG00000029859	13835	Eph receptor A1
Sh3gl3	-2.638798479	3.74E-06	1.07E-05	187	141	106	10	25	35	1.330157915	0.912084086	0.771722629	-2.117846781	-1.40207677	-1.382507256	Sh3d2c-ps1	ENSMUSG00000030638	20406	SH3 domain protein 2C, pseudogene 1
Myom3	-2.638685058	1.31E-07	6.02E-07	285	284	249	22	40	76	1.935277307	1.916788095	1.996896998	-1.029675411	-0.744450671	-0.292966692	Myom3	ENSMUSG00000037139	242702	myomesin family, member 3
Gpr35	-2.638634613	0.000144781	0.000280635	118	127	87	21	7	26	0.670662765	0.76241695	0.489363616	-1.094799501	-3.105680466	-1.792980542	Gpr35	ENSMUSG00000026271	64095	G protein-coupled receptor 35
Dnah17	-2.636451102	1.98E-08	1.27E-07	286	332	255	32	39	65	1.940311807	2.141295817	2.031127739	-0.502235672	-0.780096843	-0.514285428	Dnah17	ENSMUSG00000033987	69926	dynein, axonemal, heavy chain 17
Nsg1	-2.636122519	1.15E-09	1.35E-08	563	633	538	68	79	123	2.914803089	3.070108376	3.105597886	0.569784016	0.220359448	0.39199833	Nsg1	ENSMUSG00000029126	18196	neuron specific gene family member 1
Eps8	-2.633587348	3.50E-13	4.44E-11	2733	2937	2487	296	416	574	5.191923312	5.282259523	5.312460062	2.681104696	2.602703574	2.602072582	Eps8	ENSMUSG00000015766	13860	epidermal growth factor receptor pathway substrate 8
Prkcz	-2.632289625	2.43E-06	7.34E-06	126	160	120	14	26	21	0.764482333	1.093167539	0.949292287	-1.658050119	-1.347576962	-2.084299634	Prkcz	ENSMUSG00000029053	18762	protein kinase C, zeta
Cntn2	-2.630516127	8.20E-06	2.14E-05	137	156	137	10	19	49	0.884265952	1.056887844	1.139116752	-2.117846781	-1.781009857	-0.912421197	Cntn2	ENSMUSG00000053024	21367	contactin 2
Snx20	-2.626297139	3.49E-08	2.00E-07	341	370	262	27	52	81	2.193207251	2.297160876	2.070063392	-0.741985034	-0.373880624	-0.202594239	Snx20	ENSMUSG00000031662	71607	sorting nexin 20
Pacsin1	-2.617654383	6.80E-06	1.81E-05	105	98	83	12	13	17	0.50385765	0.392011188	0.422162616	-1.869707915	-2.296366073	-2.368857708	Pacsin1	ENSMUSG00000040276	23969	protein kinase C and casein kinase substrate in neurons 1
Itgae	-2.616586937	3.26E-05	7.29E-05	66	80	98	10	12	13	-0.157482471	0.102737597	0.659491141	-2.117846781	-2.403482126	-2.723685638	Itgae	ENSMUSG00000005947	16407	integrin alpha E, epithelial-associated
Chd7	-2.615706254	6.87E-06	1.83E-05	100	121	79	10	12	25	0.434190455	0.693194184	0.351677797	-2.117846781	-2.403482126	-1.846727419	Chd3	ENSMUSG00000018474	216848	chromodomain helicase DNA binding protein 3
Tmem151b	-2.609807494	6.41E-05	0.000133917	174	143	127	7	27	55	1.22681553	0.932251811	1.030501522	-2.594808743	-1.295061236	-0.749983641	Tmem151b	ENSMUSG00000096847	210573	transmembrane protein 151B
C4b	-2.605706289	3.25E-08	1.89E-07	434	346	344	48	59	66	2.540170383	2.200696717	2.461741793	0.073022654	-0.194830132	-0.492702495	C4b	ENSMUSG00000073418	12268	complement component 4B (Chido blood group)
Runx1t1	-2.605389051	1.27E-08	8.96E-08	395	379	310	38	48	92	2.404675674	2.331734476	2.312009227	-0.258896737	-0.48714746	-0.021703581	Runx1t1	ENSMUSG00000006586	12395	runt-related transcription factor 1; translocated to, 1 (cyclin D-related)
Tnfaip6	-2.605229735	2.37E-10	4.10E-09	630	701	546	66	102	132	3.076731082	3.217080694	3.126857794	0.527133445	0.585033751	0.49281317	Tnfaip6	ENSMUSG00000053475	21930	tumor necrosis factor alpha induced protein 6
Mustn1	-2.597100819	9.39E-08	4.55E-07	256	351	282	38	45	54	1.781065826	2.221332231	2.175845713	-0.258896737	-0.578343935	-0.775818015	Mustn1	ENSMUSG00000042485	66175	musculoskeletal, embryonic nuclear protein 1
Prkch	-2.594180831	8.50E-07	2.95E-06	166	146	121	17	23	26	1.159333203	0.961984437	0.96117725	-1.389396011	-1.517671049	-1.792980542	Prkch	ENSMUSG00000021108	18755	protein kinase C, eta
Tspyl3	-2.593248969	7.99E-07	2.80E-06	131	155	144	14	22	33	0.820165082	1.047673554	1.210557473	-1.658050119	-1.579137762	-1.464162917	Tspyl3	ENSMUSG00000074671	241732	TSPY-like 3
Sv2a	-2.592625997	7.19E-09	5.74E-08	385	398	342	41	67	71	2.367781946	2.402110787	2.453351299	-0.151066877	-0.014186317	-0.389380765	Sv2a	ENSMUSG00000038486	64051	synaptic vesicle glycoprotein 2 a
Ctsf	-2.589744848	3.65E-13	4.58E-11	3953	3870	3563	405	648	807	5.724212839	5.680122911	5.830990354	3.132569544	3.240905947	3.092616069	Ctsf	ENSMUSG00000083282	56464	cathepsin F
Card6	-2.584420052	6.32E-05	0.000132359	161	150	73	9	14	48	1.11549545	1.000698117	0.23904046	-2.260004274	-2.196656353	-0.941365503	Card6	ENSMUSG00000041849	239319	caspase recruitment domain family, member 6
Gm19510	-2.582319716	6.83E-06	1.82E-05	186	195	156	25	16	51	1.322466069	1.376845315	1.325353644	-0.850278119	-2.015797488	-0.856218514	Gm19510	NA	100503021	predicted gene, 19510
Unc13d	-2.580714466	7.79E-08	3.89E-07	351	342	321	27	63	86	2.234778921	2.183973122	2.362172939	-0.741985034	-0.101682706	-0.117550675	Unc13d	ENSMUSG00000057948	70450	unc-13 homolog D (C. elegans)
Cyp2j6	-2.577384565	2.33E-08	1.45E-07	319	357	284	35	43	82	2.09730082	2.245711444	2.186009554	-0.375441787	-0.642510346	-0.185179745	Cyp2j6	ENSMUSG00000052914	13110	cytochrome P450, family 2, subfamily j, polypeptide 6
Ccdc13	-2.577341617	3.24E-07	1.28E-06	190	240	244	20	40	52	1.352990416	1.674925861	1.967737568	-1.163002877	-0.744450671	-0.828917457	Ccdc13	ENSMUSG00000079235	100502861	coiled-coil domain containing 13
Tubb2a-ps2	-2.57482027	8.99E-05	0.000182354	79	89	75	10	19	9	0.098139533	0.254612531	0.277571665	-2.117846781	-1.781009857	-3.195280444	Tubb2a-ps2	NA	627110	tubulin, beta 2a, pseudogene 2
Htra3	-2.574620137	1.75E-06	5.49E-06	184	204	281	22	45	40	1.306958242	1.441592307	2.170736814	-1.029675411	-0.578343935	-1.196553701	Htra3	ENSMUSG00000029096	78558	HtrA serine peptidase 3
Ddit4l	-2.568575167	1.47E-12	1.10E-10	4914	4970	4164	476	863	1006	6.038086958	6.040946768	6.055816	3.365260761	3.653732772	3.410130692	Ddit4l	ENSMUSG00000046818	73284	DNA-damage-inducible transcript 4-like
Them6	-2.564445577	1.04E-12	8.86E-11	4182	3953	3794	411	690	906	5.805436726	5.710728911	5.921595639	3.15375193	3.331376597	3.259296019	Them6	ENSMUSG00000056665	223626	thioesterase superfamily member 6
Cacna1g	-2.562547052	5.36E-09	4.56E-08	584	577	535	72	74	136	2.967538854	2.936710904	3.09754395	0.651479251	0.127219629	0.535453673	Cacna1g	ENSMUSG00000020866	12291	calcium channel, voltage-dependent, T type, alpha 1G subunit
Itga6	-2.561199914	5.30E-14	1.53E-11	15288	14171	11931	1626	2126	3092	7.675305328	7.55236856	7.574288521	5.136147921	4.953474663	5.028740084	Itga6	ENSMUSG00000027111	16403	integrin alpha 6
Vdr	-2.560498642	8.32E-11	1.82E-09	1045	1062	864	121	161	201	3.80584575	3.815629097	3.788124785	1.395126654	1.238512263	1.094464788	Cyp27b1	ENSMUSG00000006724	13115	cytochrome P450, family 27, subfamily b, polypeptide 1
Aox1	-2.56039999	9.64E-08	4.65E-07	673	585	406	43	111	135	3.17183062	2.956539622	2.700244986	-0.083412475	0.705916617	0.524911116	Aox1	ENSMUSG00000063558	11761	aldehyde oxidase 1
Jag2	-2.55156921	1.91E-12	1.25E-10	2345	2221	1903	228	346	527	4.971118496	4.879295338	4.926487303	2.305493636	2.337574201	2.479125672	Jag2	ENSMUSG00000002799	16450	jagged 2
Dpep3	-2.550931615	0.000231563	0.000430473	80	64	75	5	8	32	0.116047639	-0.214429169	0.277571665	-3.031565593	-2.935247198	-1.50679192	Dpep3	ENSMUSG00000031898	71854	dipeptidase 3
Sirpa	-2.548353194	1.55E-11	5.35E-10	1457	1319	1143	143	229	282	4.284929439	4.128006401	4.191484974	1.634936016	1.744218907	1.58020631	Sirpa	ENSMUSG00000037902	19261	signal-regulatory protein alpha
Lrriq3	-2.547752361	1.03E-05	2.61E-05	83	115	129	10	19	24	0.168475623	0.620481865	1.052888607	-2.117846781	-1.781009857	-1.902554351	Lrriq3	ENSMUSG00000028182	74435	leucine-rich repeats and IQ motif containing 3
Dzank1	-2.544090672	1.00E-05	2.55E-05	180	132	107	13	34	22	1.275433357	0.817668888	0.785157023	-1.760000954	-0.972872316	-2.021139478	Dzank1	ENSMUSG00000037259	241688	double zinc ribbon and ankyrin repeat domains 1
Nr1h3	-2.53805392	2.66E-06	7.93E-06	223	196	170	18	24	69	1.582847493	1.384184601	1.44866901	-1.309918261	-1.458716487	-0.429825908	Nr1h3	ENSMUSG00000002108	22259	nuclear receptor subfamily 1, group H, member 3
Vgf	-2.537243811	1.87E-05	4.43E-05	116	76	109	13	12	23	0.646222572	0.029740708	0.811656232	-1.760000954	-2.403482126	-1.96062884	Vgf	ENSMUSG00000037428	381677	VGF nerve growth factor inducible
Zbtb8b	-2.536018574	2.38E-06	7.21E-06	140	125	128	11	24	33	0.915279053	0.73970975	1.041738488	-1.988449026	-1.458716487	-1.464162917	Zbtb8b	ENSMUSG00000048485	215627	zinc finger and BTB domain containing 8b
Slc15a1	-2.535763772	5.71E-07	2.09E-06	222	210	153	16	36	50	1.576394263	1.483196989	1.297499543	-1.473508754	-0.892645578	-0.884046189	Slc15a1	ENSMUSG00000025557	56643	solute carrier family 15 (oligopeptide transporter), member 1
Unc13a	-2.535503494	1.08E-07	5.09E-07	237	205	197	23	32	53	1.670286836	1.448610275	1.66030095	-0.967364529	-1.057824439	-0.802123454	Unc13b	ENSMUSG00000028456	22249	unc-13 homolog B (C. elegans)
Ell3	-2.530618283	1.73E-09	1.85E-08	695	777	620	71	105	194	3.218165137	3.365365362	3.309945137	0.631485036	0.626463706	1.043672046	Ell3	ENSMUSG00000027246	269344	elongation factor RNA polymerase II-like 3
Rundc3b	-2.5305983	4.55E-06	1.27E-05	163	118	122	11	21	40	1.133190716	0.657296067	0.972965103	-1.988449026	-1.643340287	-1.196553701	Rundc3b	ENSMUSG00000040570	242819	RUN domain containing 3B
Atp6v0e2	-2.526228057	3.03E-11	8.74E-10	1643	1706	1588	172	307	372	4.458142073	4.498913686	4.665556268	1.900216923	2.165555574	1.978155359	Atp6v0e2	ENSMUSG00000039347	76252	ATPase, H+ transporting, lysosomal V0 subunit E2
Onecut2	-2.525556087	1.22E-07	5.68E-07	238	297	207	33	38	49	1.676334308	1.981122607	1.73142297	-0.458721058	-0.816646122	-0.912421197	Onecut2	ENSMUSG00000045991	225631	one cut domain, family member 2
Samd12	-2.525520198	4.40E-08	2.43E-07	304	273	218	30	48	53	2.028051911	1.8600167	1.805809019	-0.59341205	-0.48714746	-0.802123454	Samd12	ENSMUSG00000058656	320679	sterile alpha motif domain containing 12
Ogdhl	-2.525175646	0.000100374	0.000201432	120	119	66	14	23	11	0.694695813	0.669361628	0.095449737	-1.658050119	-1.517671049	-2.940298592	Ogdhl	ENSMUSG00000021913	239017	oxoglutarate dehydrogenase-like
Slc2a9	-2.523453048	9.30E-10	1.13E-08	740	634	577	72	98	168	3.308543564	3.07238187	3.206402166	0.651479251	0.527875527	0.837613677	Slc2a9	ENSMUSG00000005107	117591	solute carrier family 2 (facilitated glucose transporter), member 9
Ulbp1	-2.519602732	3.91E-09	3.55E-08	445	450	321	43	70	93	2.576193618	2.578819455	2.362172939	-0.083412475	0.048120641	-0.006330349	Ulbp1	ENSMUSG00000079685	77777	UL16 binding protein 1
Tfeb	-2.519013976	8.95E-10	1.11E-08	937	840	712	95	118	222	3.648632578	3.477691005	3.509287239	1.048249057	0.793398625	1.236921209	Tfeb	ENSMUSG00000023990	21425	transcription factor EB
Rrad	-2.518499429	1.62E-09	1.75E-08	1392	1542	1351	202	196	328	4.219136842	4.353195159	4.43251462	2.131348379	1.520754099	1.797245856	Rrad	ENSMUSG00000031880	56437	Ras-related associated with diabetes
Krt7	-2.512108163	1.56E-09	1.70E-08	826	961	894	86	164	227	3.466944791	3.67160656	3.837318543	0.905694456	1.26498857	1.268862381	Krt7	ENSMUSG00000023039	110310	keratin 7
Stac2	-2.510958133	8.42E-08	4.16E-07	705	631	474	95	93	107	3.238744193	3.065550613	2.92320007	1.048249057	0.453088151	0.193283269	Stac2	ENSMUSG00000017400	217154	SH3 and cysteine rich domain 2
Dchs1	-2.510356146	6.05E-08	3.15E-07	297	313	260	41	43	60	1.994561891	2.056557074	2.05904573	-0.151066877	-0.642510346	-0.627326521	Dchs1	ENSMUSG00000036862	233651	dachsous 1 (Drosophila)
Fam221a	-2.50798954	3.65E-12	1.89E-10	1584	1661	1419	172	271	367	4.405416641	4.460372658	4.503316073	1.900216923	1.986216195	1.958703635	Fam221a	ENSMUSG00000047115	231946	family with sequence similarity 221, member A
Asrgl1	-2.507220791	4.37E-07	1.65E-06	476	398	380	31	91	114	2.673126134	2.402110787	2.60498032	-0.547103703	0.422052815	0.283605755	Asrgl1	ENSMUSG00000024654	66514	asparaginase like 1
Tinagl1	-2.506797392	2.26E-14	9.39E-12	7185	7432	6529	831	1190	1631	6.586078722	6.62134835	6.704596427	4.168298205	4.116814562	4.106518555	Tinagl1	ENSMUSG00000028776	94242	tubulointerstitial nephritis antigen-like 1
Ppl	-2.505769346	1.15E-08	8.32E-08	942	831	708	85	186	160	3.65630192	3.462170069	3.501169522	0.888949271	1.445586834	0.767797368	Ppl	ENSMUSG00000039457	19041	periplakin
Man1c1	-2.505488681	2.30E-09	2.31E-08	802	652	562	87	113	136	3.424460684	3.11270376	3.168460209	0.92224751	0.731457426	0.535453673	Man1c1	ENSMUSG00000037306	230815	mannosidase, alpha, class 1C, member 1
Sema4g	-2.498889884	1.19E-08	8.54E-08	951	808	677	89	178	152	3.670004825	3.421729793	3.436658835	0.954794514	1.38249943	0.694429858	Sema4g	ENSMUSG00000025207	26456	sema domain, immunoglobulin domain (Ig), transmembrane domain (TM) and short cytoplasmic domain, (semaphorin) 4G
Rasal1	-2.495588016	1.47E-05	3.59E-05	90	115	69	8	15	24	0.283870934	0.620481865	0.158746208	-2.417716017	-2.103394675	-1.902554351	Rasal1	ENSMUSG00000029602	19415	RAS protein activator like 1 (GAP1 like)
Cela1	-2.493314511	1.36E-08	9.45E-08	412	477	495	54	85	98	2.465307723	2.66268963	2.985626961	0.240782279	0.324727937	0.068170563	Cela1	ENSMUSG00000023031	109901	chymotrypsin-like elastase family, member 1
Ctxn1	-2.490466071	4.13E-11	1.10E-09	1282	1346	1091	133	238	282	4.100468263	4.157216745	4.124364109	1.530842954	1.799601638	1.58020631	Ctxn1	ENSMUSG00000048644	330695	cortexin 1
Ndrg4	-2.489940055	8.48E-13	7.78E-11	2998	3406	2801	366	532	702	5.325388698	5.495922206	5.483937748	2.986740159	2.956810766	2.891877563	Ndrg4	ENSMUSG00000036564	234593	N-myc downstream regulated gene 4
Adcy5	-2.4880031	2.07E-08	1.32E-07	342	354	314	34	68	76	2.197418739	2.233573333	2.330453019	-0.416480596	0.006883078	-0.292966692	Adcy5	ENSMUSG00000022840	224129	adenylate cyclase 5
2010107G23Rik	-2.487922661	0.000163252	0.000312801	85	101	130	7	14	47	0.202398193	0.435049065	1.063953211	-2.594808743	-2.196656353	-0.970902418	2010107G23Rik	ENSMUSG00000020083	69894	RIKEN cDNA 2010107G23 gene
Astl	-2.485383199	0.000496758	0.000863955	65	87	79	11	5	31	-0.17915732	0.222217268	0.351677797	-1.988449026	-3.522243839	-1.550718985	Astl	ENSMUSG00000050468	215095	astacin-like metalloendopeptidase (M12 family)
Cp	-2.484123814	3.50E-05	7.78E-05	145	156	112	19	12	48	0.96553053	1.056887844	0.850514186	-1.234591254	-2.403482126	-0.941365503	Cp	ENSMUSG00000003617	12870	ceruloplasmin
Areg	-2.481958366	6.86E-11	1.60E-09	1127	1044	918	110	193	245	3.914723746	3.790992126	3.875500398	1.258401776	1.498612257	1.378327139	Areg	ENSMUSG00000029378	11839	amphiregulin
Slc6a17	-2.481839472	1.52E-07	6.86E-07	455	439	358	38	102	87	2.608179332	2.543201304	2.51914739	-0.258896737	0.585033751	-0.101127403	Slc6a17	ENSMUSG00000027894	229706	solute carrier family 6 (neurotransmitter transporter), member 17
Maml3	-2.477418645	9.02E-08	4.40E-07	261	245	255	29	38	69	1.808857633	1.70454227	2.031127739	-0.641256261	-0.816646122	-0.429825908	Maml3	ENSMUSG00000061143	433586	mastermind like 3 (Drosophila)
Col7a1	-2.474671363	6.90E-10	9.10E-09	3492	3277	2143	403	452	664	5.545369598	5.440237313	5.09776815	3.125439067	2.722174194	2.81174771	Col7a1	ENSMUSG00000025650	12836	collagen, type VII, alpha 1
Obscn	-2.474035737	4.62E-08	2.53E-07	551	489	425	60	63	146	2.883779643	2.698455438	2.766087183	0.391050729	-0.101682706	0.636847029	Obscn	ENSMUSG00000061462	380698	obscurin, cytoskeletal calmodulin and titin-interacting RhoGEF
Amy1	-2.471068818	0.000391573	0.00069499	76	85	44	11	5	20	0.043041535	0.189077839	-0.479957782	-1.988449026	-3.522243839	-2.150351998	Amy1	ENSMUSG00000074264	11722	amylase 1, salivary
Gm1600	-2.465338798	0.000381782	0.000679612	86	49	64	7	19	8	0.21906498	-0.592461876	0.051654662	-2.594808743	-1.781009857	-3.34194003	Gm1600	NA	381033	predicted gene 1600
Ccdc64	-2.461183337	3.85E-08	2.17E-07	447	462	385	39	94	107	2.582647745	2.616698246	2.623795618	-0.222050665	0.468358994	0.193283269	Bicdl1	ENSMUSG00000041609	75665	BICD family like cargo adaptor 1
Aqp3	-2.460381251	1.89E-06	5.90E-06	170	167	120	13	29	42	1.193468893	1.154541207	0.949292287	-1.760000954	-1.195438616	-1.128401796	Aqp3	ENSMUSG00000028435	11828	aquaporin 3
Lgals9	-2.457851042	2.47E-14	9.39E-12	8208	8308	7313	957	1440	1854	6.778094721	6.782077125	6.868176692	4.371818639	4.391716799	4.291259975	Lgals9	ENSMUSG00000001123	16859	lectin, galactose binding, soluble 9
Isoc2b	-2.455578982	7.48E-06	1.97E-05	135	119	125	10	28	33	0.86321387	0.669361628	1.007761561	-2.117846781	-1.24439019	-1.464162917	Isoc2b	ENSMUSG00000052605	67441	isochorismatase domain containing 2b
Sh3tc1	-2.454890574	5.93E-08	3.10E-07	595	639	505	96	84	120	2.994411737	3.083695905	3.01443061	1.063252763	0.307849125	0.356764641	Sh3tc1	ENSMUSG00000036553	231147	SH3 domain and tetratricopeptide repeats 1
Matn1	-2.454741033	0.000125998	0.000247177	191	211	197	40	47	20	1.360521649	1.490015933	1.66030095	-0.186122245	-0.516910324	-2.150351998	Matn1	ENSMUSG00000040533	17180	matrilin 1, cartilage matrix protein
Cxcl1	-2.449965022	2.72E-13	3.74E-11	5284	5888	4764	664	884	1314	6.142797738	6.28543008	6.249980562	3.844919489	3.688379917	3.795013907	Cxcl1	ENSMUSG00000029380	14825	chemokine (C-X-C motif) ligand 1
Tnfrsf14	-2.446037429	5.26E-06	1.45E-05	224	122	157	18	36	32	1.589271987	0.704964432	1.334520106	-1.309918261	-0.892645578	-1.50679192	Tnfrsf14	ENSMUSG00000042333	230979	tumor necrosis factor receptor superfamily, member 14 (herpesvirus entry mediator)
Tmem40	-2.442288784	6.60E-09	5.37E-08	413	391	377	45	77	90	2.468796186	2.376580344	2.593572218	-0.018789082	0.183821874	-0.052950396	Tmem40	ENSMUSG00000059900	94346	transmembrane protein 40
D630023F18Rik	-2.43601333	4.02E-06	1.14E-05	142	143	123	22	22	25	0.935590163	0.932251811	0.984657422	-1.029675411	-1.579137762	-1.846727419	D630023F18Rik	ENSMUSG00000044816	98303	RIKEN cDNA D630023F18 gene
Nfatc2	-2.434220456	8.26E-07	2.88E-06	251	226	197	37	30	51	1.752728109	1.588611592	1.66030095	-0.296708567	-1.148093636	-0.856218514	Nfatc2	ENSMUSG00000027544	18019	nuclear factor of activated T cells, cytoplasmic, calcineurin dependent 2
Clca2	-2.433367217	3.93E-05	8.65E-05	128	161	92	18	12	42	0.78701398	1.102096682	0.569188807	-1.309918261	-2.403482126	-1.128401796	Clca1	ENSMUSG00000028255	23844	chloride channel accessory 1
Dcxr	-2.428516438	1.42E-13	2.50E-11	10006	10293	9521	1159	1863	2474	7.063823903	7.091131639	7.248785774	4.64793592	4.76305407	4.707202011	Dcxr	ENSMUSG00000039450	67880	dicarbonyl L-xylulose reductase
Gstm2	-2.423606303	1.35E-09	1.51E-08	604	614	464	61	110	138	3.016032315	3.026217009	2.892496018	0.414641363	0.692974626	0.556310443	Gstm2	ENSMUSG00000040562	14863	glutathione S-transferase, mu 2
Tro	-2.421103758	2.61E-06	7.81E-06	128	165	100	17	20	31	0.78701398	1.137270663	0.688378084	-1.389396011	-1.71053355	-1.550718985	Tro	ENSMUSG00000025272	56191	trophinin
Perp	-2.420401571	5.06E-15	4.28E-12	42958	42696	37817	4967	7238	10700	9.16576792	9.143454998	9.238534897	6.746803543	6.72045716	6.8192924	Perp	ENSMUSG00000019851	64058	PERP, TP53 apoptosis effector
Adamts7	-2.41780614	9.29E-10	1.13E-08	2053	1955	1681	230	422	385	4.779357088	4.69534925	4.747620424	2.318057638	2.623315095	2.027535611	Adamts7	ENSMUSG00000032363	108153	a disintegrin-like and metallopeptidase (reprolysin type) with thrombospondin type 1 motif, 7
Sbsn	-2.415373156	1.73E-11	5.76E-10	1242	1282	1084	139	228	302	4.054775634	4.086991912	4.115085348	1.594195546	1.737931951	1.678605929	Sbsn	ENSMUSG00000046056	282619	suprabasin
Cdcp1	-2.414217231	5.02E-08	2.71E-07	404	347	378	56	59	87	2.43709213	2.2048475	2.597384951	0.292630423	-0.194830132	-0.101127403	Cdcp1	ENSMUSG00000035498	109332	CUB domain containing protein 1
Lrrc39	-2.414172563	1.61E-07	7.16E-07	209	213	193	24	41	46	1.48976472	1.503557886	1.63084048	-0.907633835	-0.709664052	-1.001056717	Lrrc39	ENSMUSG00000027961	109245	leucine rich repeat containing 39
Hoxa1	-2.413602979	1.86E-06	5.82E-06	283	249	197	41	29	62	1.925155293	1.727805294	1.66030095	-0.151066877	-1.195438616	-0.581041906	Hoxa1	ENSMUSG00000029844	15394	homeobox A1
Chrm4	-2.413256926	0.00012748	0.00024966	103	79	76	7	11	38	0.476393142	0.084831709	0.296458109	-2.594808743	-2.519193702	-1.268085372	Chrm4	ENSMUSG00000040495	12672	cholinergic receptor, muscarinic 4
Rprm	-2.41112635	1.85E-11	6.08E-10	1707	1516	1250	178	283	360	4.513237709	4.328679337	4.32049169	1.9495006	2.048506141	1.931022945	Rprm	ENSMUSG00000075334	67874	reprimo, TP53 dependent G2 arrest mediator candidate
Col5a3	-2.407407146	1.51E-13	2.58E-11	10538	9843	7965	1236	1652	2303	7.138551901	7.026644976	6.991373338	4.740683194	4.589736436	4.603929148	Col5a3	ENSMUSG00000004098	53867	collagen, type V, alpha 3
Meis2	-2.407357364	1.58E-10	3.01E-09	1205	1191	1163	163	204	283	4.011181454	3.980861159	4.216491386	1.822983306	1.578189608	1.585288992	Meis2	ENSMUSG00000027210	17536	Meis homeobox 2
Hoxa7	-2.407117875	0.000412707	0.000728925	72	84	64	4	13	34	-0.033856806	0.172218221	0.051654662	-3.31221402	-2.296366073	-1.422757456	Hoxa7	ENSMUSG00000038236	15404	homeobox A7
Ankrd35	-2.406081673	3.04E-09	2.91E-08	628	678	535	64	110	181	3.072151545	3.169026251	3.09754395	0.483183478	0.692974626	0.944318622	Ankrd35	ENSMUSG00000038354	213121	ankyrin repeat domain 35
Psrc1	-2.404454824	3.41E-14	1.11E-11	9297	8961	7850	1118	1605	2087	6.957807383	6.891222083	6.970393989	4.596005506	4.548120958	4.46193252	Psrc1	ENSMUSG00000068744	56742	proline/serine-rich coiled-coil 1
Trim66	-2.403182398	5.23E-09	4.47E-08	518	449	420	56	75	130	2.794856223	2.575617535	2.749049518	0.292630423	0.146334855	0.471010804	Trim66	ENSMUSG00000031026	330627	tripartite motif-containing 66
Tnni1	-2.402604932	0.000352704	0.000632649	49	110	82	5	21	20	-0.579261754	0.556957056	0.404861615	-3.031565593	-1.643340287	-2.150351998	Tnni1	ENSMUSG00000026418	21952	troponin I, skeletal, slow 1
Pllp	-2.402485556	9.05E-06	2.33E-05	87	146	116	14	18	30	0.23554142	0.961984437	0.900748461	-1.658050119	-1.855106578	-1.596025654	Pllp	ENSMUSG00000031775	67801	plasma membrane proteolipid
Cmah	-2.401571822	7.27E-07	2.57E-06	236	284	190	23	58	52	1.664213908	1.916788095	1.608343487	-0.967364529	-0.21908799	-0.828917457	Cmah	ENSMUSG00000016756	12763	cytidine monophospho-N-acetylneuraminic acid hydroxylase
Serpini1	-2.401544649	1.60E-09	1.74E-08	787	791	717	79	145	221	3.397258448	3.391093277	3.519370572	0.784178986	1.088462133	1.230447229	Serpini1	ENSMUSG00000027834	20713	serine (or cysteine) peptidase inhibitor, clade I, member 1
Tbc1d9	-2.399502702	3.34E-11	9.41E-10	2113	2012	1668	208	387	507	4.820895047	4.736788548	4.736425931	2.173441737	2.498706302	2.423453382	Tbc1d9	ENSMUSG00000031709	71310	TBC1 domain family, member 9
Azin2	-2.393821267	8.21E-14	1.93E-11	4478	4546	3984	529	814	1101	5.90407398	5.912327617	5.992077491	3.517367734	3.56949898	3.540148575	Azin2	ENSMUSG00000028789	242669	antizyme inhibitor 2
Tnfrsf18	-2.391815892	1.84E-13	2.85E-11	5084	5079	4650	595	939	1262	6.087142707	6.072238713	6.215044463	3.686791228	3.77536563	3.736821348	Tnfrsf18	ENSMUSG00000041954	21936	tumor necrosis factor receptor superfamily, member 18
Txlnb	-2.39049229	0.000257709	0.000474827	87	94	32	7	10	18	0.23554142	0.332554331	-0.928715151	-2.594808743	-2.645001603	-2.292285925	Txlnb	ENSMUSG00000039891	378431	taxilin beta
Tcaf2	-2.386413586	6.94E-11	1.61E-09	1986	2010	1783	274	311	494	4.731514249	4.735354509	4.83256378	2.569939846	2.184172771	2.386079161	Tcaf2	ENSMUSG00000029851	232748	TRPM8 channel-associated factor 2
Trerf1	-2.385468067	9.83E-08	4.73E-07	512	490	417	72	98	86	2.778082527	2.701396282	2.738729495	0.651479251	0.527875527	-0.117550675	Trerf1	NA	224829	transcriptional regulating factor 1
Hoxb3	-2.380946426	1.06E-06	3.57E-06	226	259	178	37	38	42	1.602035779	1.784372843	1.514674171	-0.296708567	-0.816646122	-1.128401796	Hoxb3	ENSMUSG00000048763	15410	homeobox B3
4930539E08Rik	-2.380363926	1.14E-06	3.81E-06	181	142	130	20	28	33	1.283379394	0.922203189	1.063953211	-1.163002877	-1.24439019	-1.464162917	4930539E08Rik	ENSMUSG00000048905	207819	RIKEN cDNA 4930539E08 gene
Plekhb1	-2.378646776	1.51E-05	3.65E-05	108	121	94	9	26	28	0.544098293	0.693194184	0.599921914	-2.260004274	-1.347576962	-1.691144701	Plekhb1	ENSMUSG00000030701	27276	pleckstrin homology domain containing, family B (evectins) member 1
Necab2	-2.37333256	1.53E-05	3.72E-05	106	117	99	16	23	18	0.517396295	0.645128747	0.674006911	-1.473508754	-1.517671049	-2.292285925	Necab2	ENSMUSG00000031837	117148	N-terminal EF-hand calcium binding protein 2
Fam227a	-2.372418798	1.89E-07	8.20E-07	364	369	229	48	58	65	2.287090901	2.293267716	1.876547014	0.073022654	-0.21908799	-0.514285428	Fam227a	ENSMUSG00000042564	75729	family with sequence similarity 227, member A
Rinl	-2.366447158	0.000562586	0.000969188	78	54	75	5	9	35	0.080006337	-0.455146997	0.277571665	-3.031565593	-2.78283762	-1.382507256	Rinl	ENSMUSG00000051735	320435	Ras and Rab interactor-like
Ang	-2.364594705	4.45E-07	1.68E-06	271	275	253	32	38	92	1.862884916	1.870506327	2.019807496	-0.502235672	-0.816646122	-0.021703581	Ang	ENSMUSG00000072115	11727	angiogenin, ribonuclease, RNase A family, 5
Cdc42bpg	-2.355437616	1.81E-12	1.23E-10	18438	16872	13650	2215	3202	3799	7.945570696	7.804040522	7.768460968	5.581972458	5.544084191	5.325702689	Cdc42bpg	ENSMUSG00000024769	240505	CDC42 binding protein kinase gamma (DMPK-like)
Rarres1	-2.355310728	5.27E-07	1.95E-06	205	174	138	22	33	40	1.462028003	1.213410169	1.149541726	-1.029675411	-1.014723174	-1.196553701	Rarres1	ENSMUSG00000049404	109222	retinoic acid receptor responder (tazarotene induced) 1
Fam83g	-2.352643056	1.51E-05	3.66E-05	172	211	119	33	22	35	1.210238557	1.490015933	0.937308601	-0.458721058	-1.579137762	-1.382507256	Fam83g	ENSMUSG00000042377	69640	family with sequence similarity 83, member G
Itga8	-2.352002404	3.40E-08	1.96E-07	382	328	368	47	60	101	2.356527306	2.123865016	2.55879646	0.043063281	-0.170973417	0.111091707	Itga8	ENSMUSG00000026768	241226	integrin alpha 8
P2rx7	-2.351928553	1.34E-10	2.68E-09	1177	1212	913	156	200	264	3.977292849	4.006054965	3.867628748	1.759917144	1.549757657	1.485516102	P2rx7	ENSMUSG00000029468	18439	purinergic receptor P2X, ligand-gated ion channel, 7
Flrt3	-2.346619029	2.28E-11	7.14E-10	1492	1514	1245	168	265	405	4.319151446	4.326776135	4.314713455	1.86640025	1.954032763	2.100350934	Flrt3	ENSMUSG00000051379	71436	fibronectin leucine rich transmembrane protein 3
Plekha2	-2.345934835	2.67E-12	1.56E-10	4372	4407	3668	477	804	1190	5.869521147	5.867537558	5.872881209	3.368284286	3.551687147	3.652163974	Plekha2	ENSMUSG00000031557	83436	pleckstrin homology domain-containing, family A (phosphoinositide binding specific) member 2
Podn	-2.344990155	1.37E-09	1.52E-08	777	781	548	88	146	165	3.378834433	3.372763132	3.132124178	0.938612792	1.098311619	0.811826865	Podn	ENSMUSG00000028600	242608	podocan
Ccdc148	-2.343542881	3.05E-05	6.86E-05	114	100	61	14	14	20	0.6213612	0.420845284	-0.016636311	-1.658050119	-2.196656353	-2.150351998	Ccdc148	ENSMUSG00000036641	227933	coiled-coil domain containing 148
Cyp1b1	-2.342057322	1.60E-11	5.45E-10	6731	6686	5779	786	1094	1971	6.491925803	6.468764418	6.528579745	4.088044268	3.995569333	4.3794844	Cyp1b1	ENSMUSG00000024087	13078	cytochrome P450, family 1, subfamily b, polypeptide 1
Fras1	-2.341827925	3.86E-06	1.10E-05	330	311	205	41	71	45	2.146050839	2.047340664	1.717476297	-0.151066877	0.068305663	-1.031854761	Fras1	ENSMUSG00000034687	231470	Fraser extracellular matrix complex subunit 1
Rab11fip4os1	-2.341345626	0.00103489	0.001700081	164	98	88	35	19	12	1.141957619	0.392011188	0.505685909	-0.375441787	-1.781009857	-2.827930519	Rab11fip4os1	ENSMUSG00000087434	790912	RAB11 family interacting protein 4 (class II), opposite strand 1
6330403A02Rik	-2.334879519	4.62E-05	9.98E-05	73	113	89	8	17	31	-0.014244554	0.595406587	0.521825601	-2.417716017	-1.933215921	-1.550718985	Stum	ENSMUSG00000053963	381310	mechanosensory transduction mediator
Cdc42ep5	-2.32888861	8.66E-05	0.000176149	55	82	64	8	10	20	-0.415954595	0.137896145	0.051654662	-2.417716017	-2.645001603	-2.150351998	Cdc42ep5	ENSMUSG00000063838	58804	CDC42 effector protein (Rho GTPase binding) 5
Rgs9bp	-2.328207891	5.26E-07	1.95E-06	456	551	395	40	102	159	2.611339244	2.870318144	2.660705684	-0.186122245	0.585033751	0.758827893	Rgs9bp	ENSMUSG00000056043	243923	regulator of G-protein signalling 9 binding protein
Tnxb	-2.327789904	3.93E-07	1.51E-06	326	273	247	27	68	77	2.128513564	1.8600167	1.985303853	-0.741985034	0.006883078	-0.274433638	Tnxb	ENSMUSG00000033327	81877	tenascin XB
Tmem184a	-2.326502255	1.25E-09	1.42E-08	842	885	765	122	135	230	3.494588039	3.552885629	3.612745104	1.406936912	0.986082037	1.287693058	Tmem184a	ENSMUSG00000036687	231832	transmembrane protein 184a
Prkar1b	-2.323179981	3.90E-09	3.55E-08	519	612	489	73	113	125	2.797632976	3.021518223	2.968064633	0.671200151	0.731457426	0.415018313	Prkar1b	ENSMUSG00000025855	19085	protein kinase, cAMP dependent regulatory, type I beta
Epha7	-2.3222718	2.29E-07	9.67E-07	257	285	235	39	54	53	1.786667182	1.921840048	1.91371773	-0.222050665	-0.32041632	-0.802123454	Epha7	ENSMUSG00000028289	13841	Eph receptor A7
Capn5	-2.319895122	3.69E-11	1.01E-09	2221	1999	1830	235	428	549	4.892776429	4.727441712	4.870082261	2.348997128	2.643636285	2.537981624	Capn5	ENSMUSG00000035547	12337	calpain 5
Itgb7	-2.318185808	2.30E-10	3.99E-09	821	858	761	102	170	209	3.458196514	3.508240747	3.605190611	1.15013884	1.31652663	1.150404977	Itgb7	ENSMUSG00000001281	16421	integrin beta 7
Scn4b	-2.317871648	1.16E-05	2.89E-05	307	278	278	50	74	42	2.042170162	1.886099135	2.155300663	0.131137182	0.127219629	-1.128401796	Scn4b	ENSMUSG00000046480	399548	sodium channel, type IV, beta
D130040H23Rik	-2.31778831	3.99E-06	1.13E-05	267	258	183	20	45	91	1.841516176	1.77881486	1.554444686	-1.163002877	-0.578343935	-0.037242395	D130040H23Rik	ENSMUSG00000079038	211135	RIKEN cDNA D130040H23 gene
Itga4	-2.317764112	7.96E-05	0.0001632	90	79	74	8	24	16	0.283870934	0.084831709	0.258434694	-2.417716017	-1.458716487	-2.449722497	Itga4	ENSMUSG00000027009	16401	integrin alpha 4
Rax	-2.308217413	5.27E-05	0.000112448	111	87	78	16	11	26	0.583246908	0.222217268	0.333505065	-1.473508754	-2.519193702	-1.792980542	Rax	ENSMUSG00000024518	19434	retina and anterior neural fold homeobox
Zfp385a	-2.307246672	1.33E-11	4.76E-10	6516	6513	5790	853	1372	1471	6.44509906	6.430949433	6.531322801	4.205966084	4.321976835	3.95768836	Zfp385a	ENSMUSG00000000552	29813	zinc finger protein 385A
Arvcf	-2.300743875	8.12E-14	1.93E-11	11410	10780	9067	1381	2156	2662	7.253238497	7.157818498	7.178304693	4.900637319	4.973681045	4.812811699	Arvcf	ENSMUSG00000000325	11877	armadillo repeat gene deleted in velocardiofacial syndrome
Rom1	-2.299730002	1.92E-12	1.25E-10	3980	4168	3788	498	780	1150	5.734030686	5.787116057	5.919312827	3.43035711	3.50801952	3.602892935	Rom1	ENSMUSG00000071648	19881	rod outer segment membrane protein 1
Ifi30	-2.29941615	1.87E-12	1.24E-10	6064	5778	5000	820	1008	1509	6.341399734	6.258227612	6.319722539	4.149088921	3.877561797	3.994450718	Ifi30	ENSMUSG00000031838	65972	interferon gamma inducible protein 30
Pdk4	-2.298690298	3.73E-10	5.80E-09	1746	1589	1467	180	362	443	4.545808172	4.396481872	4.551280801	1.965561335	2.402612721	2.229325894	Pdk4	ENSMUSG00000019577	27273	pyruvate dehydrogenase kinase, isoenzyme 4
Il2rb	-2.296272806	1.61E-05	3.88E-05	172	131	153	15	46	33	1.210238557	0.806786486	1.297499543	-1.56283076	-0.547300154	-1.464162917	Il2rb	ENSMUSG00000068227	16185	interleukin 2 receptor, beta chain
Fam131a	-2.29575898	1.15E-11	4.27E-10	1890	2041	1609	232	350	546	4.660074026	4.757423509	4.684499147	2.330513169	2.354110767	2.530095805	Fam131a	ENSMUSG00000050821	78408	family with sequence similarity 131, member A
Etnk2	-2.295542141	1.57E-11	5.38E-10	1675	1529	1470	208	304	425	4.485952884	4.340989322	4.554226302	2.173441737	2.151433301	2.169667046	Etnk2	ENSMUSG00000070644	214253	ethanolamine kinase 2
Pcyox1l	-2.292307228	1.52E-12	1.11E-10	3079	2961	2676	404	583	747	5.363836742	5.293996481	5.418095262	3.129008711	3.088649581	2.981348508	Pcyox1l	ENSMUSG00000024579	240334	prenylcysteine oxidase 1 like
Gata3	-2.285991286	2.67E-07	1.09E-06	196	261	218	28	42	66	1.397599139	1.795424982	1.805809019	-0.690741717	-0.675696506	-0.492702495	Gata3	ENSMUSG00000015619	14462	GATA binding protein 3
F2rl1	-2.284712609	9.79E-07	3.34E-06	362	405	287	34	101	87	2.279165336	2.427197279	2.201122304	-0.416480596	0.570955092	-0.101127403	F2rl1	ENSMUSG00000021678	14063	coagulation factor II (thrombin) receptor-like 1
Notch3	-2.283649322	6.47E-13	6.62E-11	10849	9618	9000	1342	2040	2526	7.180508718	6.993287483	7.167605463	4.859328601	4.89393009	4.737195007	Notch3	ENSMUSG00000038146	18131	notch 3
Cemip	-2.283416805	3.95E-10	6.06E-09	1144	1032	902	144	221	244	3.936303098	3.774330593	3.850158435	1.644943876	1.693139005	1.372458831	Cemip	ENSMUSG00000052353	80982	cell migration inducing protein, hyaluronan binding
Nsun7	-2.280033268	1.75E-07	7.66E-07	286	240	232	36	55	57	1.940311807	1.674925861	1.895252081	-0.335538148	-0.29440926	-0.699662648	Nsun7	ENSMUSG00000029206	70918	NOL1/NOP2/Sun domain family, member 7
Bmp8a	-2.278772051	2.76E-08	1.66E-07	368	356	295	52	66	81	2.302812596	2.241676743	2.240665708	0.187001111	-0.035567979	-0.202594239	Bmp8a	ENSMUSG00000032726	12163	bone morphogenetic protein 8a
Fhod3	-2.273008014	1.31E-05	3.23E-05	486	407	351	64	45	176	2.703054787	2.434285449	2.490730097	0.483183478	-0.578343935	0.904206749	Fhod3	ENSMUSG00000034295	225288	formin homology 2 domain containing 3
Kcnj15	-2.271043515	1.72E-06	5.42E-06	255	165	140	25	38	44	1.775442637	1.137270663	1.170168367	-0.850278119	-0.816646122	-1.063324636	Kcnj15	ENSMUSG00000062609	16516	potassium inwardly-rectifying channel, subfamily J, member 15
Nipal2	-2.270258814	0.000307821	0.000559911	98	149	132	32	12	34	0.405353484	0.991116653	1.085831051	-0.502235672	-2.403482126	-1.422757456	Nipal2	ENSMUSG00000038879	223473	NIPA-like domain containing 2
Plscr2	-2.267277962	3.91E-09	3.55E-08	637	815	568	102	129	168	3.092645945	3.434158141	3.18375694	1.15013884	0.920974624	0.837613677	Plscr2	ENSMUSG00000032372	18828	phospholipid scramblase 2
Mboat2	-2.264231129	9.88E-10	1.19E-08	819	926	681	122	143	224	3.454682295	3.618143083	3.445146687	1.406936912	1.068559104	1.249782663	Mboat2	ENSMUSG00000020646	67216	membrane bound O-acyltransferase domain containing 2
Ldb3	-2.26385076	3.72E-09	3.42E-08	682	586	499	82	129	142	3.190965857	2.958999159	2.997217519	0.837514988	0.920974624	0.597140644	Ldb2	ENSMUSG00000039706	16826	LIM domain binding 2
Agpat9	-2.26316958	1.42E-08	9.81E-08	665	742	570	113	114	165	3.1546058	3.298963708	3.18882002	1.296993676	0.744060246	0.811826865	Gpat3	ENSMUSG00000029314	231510	glycerol-3-phosphate acyltransferase 3
Syt13	-2.261143358	0.000144905	0.000280833	130	104	155	29	14	36	0.809199138	0.476840158	1.316128568	-0.641256261	-2.196656353	-1.343349597	Syt13	ENSMUSG00000027220	80976	synaptotagmin XIII
Gdnf	-2.260685433	7.15E-12	3.04E-10	4416	4599	3763	547	976	1104	5.883964427	5.929046211	5.909762034	3.565581974	3.831064906	3.544069493	Gdnf	ENSMUSG00000022144	14573	glial cell line derived neurotrophic factor
Pnp2	-2.259419695	4.44E-08	2.44E-07	481	343	392	57	75	114	2.688168068	2.18817223	2.649731477	0.317872081	0.146334855	0.283605755	Pnp2	ENSMUSG00000068417	667034	purine-nucleoside phosphorylase 2
Vwf	-2.258331819	4.68E-06	1.31E-05	179	198	163	16	46	57	1.267443312	1.398752103	1.388328485	-1.473508754	-0.547300154	-0.699662648	Vwf	ENSMUSG00000001930	22371	Von Willebrand factor
Slc39a8	-2.256500365	6.85E-06	1.83E-05	209	167	252	30	30	72	1.48976472	1.154541207	2.01411389	-0.59341205	-1.148093636	-0.369575593	Slc39a8	ENSMUSG00000053897	67547	solute carrier family 39 (metal ion transporter), member 8
Srcin1	-2.255546921	0.000316137	0.000573885	110	155	121	24	40	15	0.570315048	1.047673554	0.96117725	-0.907633835	-0.744450671	-2.535390406	Srcin1	ENSMUSG00000038453	56013	SRC kinase signaling inhibitor 1
Lix1	-2.250768142	0.001920828	0.003015758	40	98	70	13	19	7	-0.865173526	0.392011188	0.179242596	-1.760000954	-1.781009857	-3.505213359	Lix1	ENSMUSG00000047786	66643	limb and CNS expressed 1
Plekho1	-2.243559259	5.07E-13	5.58E-11	3598	3761	3096	461	700	1037	5.588498303	5.63891723	5.628357622	3.319130618	3.352106084	3.453858674	Plekho1	ENSMUSG00000015745	67220	pleckstrin homology domain containing, family O member 1
Ehd3	-2.243228656	6.86E-10	9.08E-09	1015	937	941	130	220	248	3.763865827	3.635160352	3.911166853	1.498091921	1.686624954	1.395790187	Ehd3	ENSMUSG00000024065	57440	EH-domain containing 3
Kif1a	-2.241110372	2.20E-06	6.72E-06	138	172	127	23	25	39	0.894677903	1.196834145	1.030501522	-0.967364529	-1.40207677	-1.231876247	Kif1a	ENSMUSG00000014602	16560	kinesin family member 1A
Dffb	-2.23963788	3.89E-13	4.84E-11	4292	4213	3750	586	846	1102	5.842884353	5.802604733	5.904770522	3.664826655	3.625062581	3.541456732	Dffb	ENSMUSG00000029027	13368	DNA fragmentation factor, beta subunit
Map4k1	-2.234546967	2.51E-07	1.04E-06	339	367	274	50	79	68	2.184747211	2.285449738	2.134458804	0.131137182	0.220359448	-0.45048178	Map4k1	ENSMUSG00000037337	26411	mitogen-activated protein kinase kinase kinase kinase 1
Tubb2b	-2.234019399	6.02E-12	2.73E-10	2166	2351	2031	301	472	592	4.856617788	4.961321997	5.020359527	2.705217949	2.784506733	2.646516433	Tubb2b	ENSMUSG00000045136	73710	tubulin, beta 2B class IIB
Sp7	-2.232774282	1.46E-05	3.56E-05	102	110	80	16	17	24	0.462462302	0.556957056	0.369624462	-1.473508754	-1.933215921	-1.902554351	Sp7	ENSMUSG00000060284	170574	Sp7 transcription factor 7
Ppp1r14d	-2.231395999	0.000353642	0.000634153	65	106	72	16	8	27	-0.17915732	0.504043144	0.219381952	-1.473508754	-2.935247198	-1.741164269	Ppp1r14d	ENSMUSG00000027317	72112	protein phosphatase 1, regulatory (inhibitor) subunit 14D
Gprin2	-2.228454762	9.30E-06	2.38E-05	152	129	92	18	29	26	1.033065777	0.784772282	0.569188807	-1.309918261	-1.195438616	-1.792980542	Gprin2	ENSMUSG00000071531	432839	G protein regulated inducer of neurite outgrowth 2
Aldh4a1	-2.226601199	1.29E-13	2.44E-11	11281	10723	10129	1501	2171	3118	7.236836201	7.150170671	7.338084424	5.020793149	4.983679089	5.040815461	Aldh4a1	ENSMUSG00000028737	212647	aldehyde dehydrogenase 4 family, member A1
H2-T10	-2.220729726	2.16E-07	9.19E-07	481	435	368	43	97	151	2.688168068	2.530028081	2.55879646	-0.083412475	0.51322499	0.684990914	H2-T10	ENSMUSG00000079491	15024	histocompatibility 2, T region locus 10
Mgat4a	-2.2197202	2.25E-06	6.85E-06	176	241	170	24	53	45	1.243204191	1.680897981	1.44866901	-0.907633835	-0.346900822	-1.031854761	Mgat4a	ENSMUSG00000026110	269181	mannoside acetylglucosaminyltransferase 4, isoenzyme A
1700056E22Rik	-2.217703659	3.24E-06	9.45E-06	249	170	194	29	31	73	1.741235311	1.180065454	1.638262189	-0.641256261	-1.102253137	-0.350038627	1700056E22Rik	ENSMUSG00000044854	73363	RIKEN cDNA 1700056E22 gene
Rnf165	-2.216271274	0.000110417	0.000219361	107	71	69	10	24	16	0.53080907	-0.06702722	0.158746208	-2.117846781	-1.458716487	-2.449722497	Rnf165	ENSMUSG00000025427	225743	ring finger protein 165
Dnah9	-2.213991702	3.18E-05	7.13E-05	112	103	97	19	14	32	0.59606388	0.463043866	0.644827833	-1.234591254	-2.196656353	-1.50679192	Dnah9	ENSMUSG00000056752	237806	dynein, axonemal, heavy chain 9
Dusp9	-2.213365153	4.88E-12	2.30E-10	4516	4364	3826	553	852	1362	5.91626206	5.85339522	5.933710008	3.58130185	3.635246656	3.846723324	Dusp9	ENSMUSG00000031383	75590	dual specificity phosphatase 9
Tex15	-2.212597818	1.75E-12	1.21E-10	5428	5419	4097	657	1017	1538	6.181580301	6.165701785	6.03241886	3.829644807	3.890373504	4.021889182	Tex15	ENSMUSG00000009628	104271	testis expressed gene 15
1700088E04Rik	-2.211304773	1.07E-07	5.07E-07	433	381	394	72	76	99	2.536850499	2.339306265	2.657056883	0.651479251	0.165200119	0.082619958	1700088E04Rik	ENSMUSG00000033029	27660	RIKEN cDNA 1700088E04 gene
Mttp	-2.20978611	8.96E-10	1.11E-08	2219	2370	2055	253	528	692	4.891477325	4.972929246	5.03730031	2.455187662	2.945942438	2.871218453	Mttp	ENSMUSG00000028158	17777	microsomal triglyceride transfer protein
Hoxd4	-2.209708492	2.61E-05	5.97E-05	158	163	71	18	21	38	1.088538823	1.119790866	0.199451867	-1.309918261	-1.643340287	-1.268085372	Hoxd4	ENSMUSG00000101174	15436	homeobox D4
Eml2	-2.208471141	4.20E-07	1.60E-06	267	300	254	34	75	66	1.841516176	1.995570289	2.025478721	-0.416480596	0.146334855	-0.492702495	Eml2	ENSMUSG00000040811	72205	echinoderm microtubule associated protein like 2
Cnksr1	-2.206995212	2.75E-08	1.66E-07	656	663	597	115	109	176	3.134978835	3.136801374	3.255487429	1.32215977	0.679915484	0.904206749	Cnksr1	ENSMUSG00000028841	194231	connector enhancer of kinase suppressor of Ras 1
Prr7	-2.206837778	6.52E-11	1.55E-09	1507	1532	1288	226	298	379	4.333573112	4.343815233	4.36366594	2.292819256	2.122767142	2.004954553	Prr7	ENSMUSG00000034686	432763	proline rich 7 (synaptic)
Plau	-2.198666924	7.86E-15	5.27E-12	14403	14372	11995	1990	2863	3831	7.589281144	7.572686307	7.582006137	5.427482542	5.382690537	5.337799736	Plau	ENSMUSG00000021822	18792	plasminogen activator, urokinase
Sfrp2	-2.193030728	2.14E-07	9.13E-07	583	533	459	95	120	109	2.965070861	2.822495962	2.876895417	1.048249057	0.817449168	0.219671831	Sfrp2	ENSMUSG00000027996	20319	secreted frizzled-related protein 2
Tigit	-2.192863661	1.87E-06	5.83E-06	209	257	172	26	60	50	1.48976472	1.773235382	1.465455561	-0.795115714	-0.170973417	-0.884046189	Tigit	ENSMUSG00000071552	100043314	T cell immunoreceptor with Ig and ITIM domains
5330417C22Rik	-2.192743221	6.09E-06	1.65E-05	168	140	92	16	27	41	1.176502007	0.901893505	0.569188807	-1.473508754	-1.295061236	-1.162075355	5330417C22Rik	ENSMUSG00000040412	229722	RIKEN cDNA 5330417C22 gene
Cysrt1	-2.192192034	1.86E-05	4.41E-05	109	149	117	12	28	46	0.557266221	0.991116653	0.913038406	-1.869707915	-1.24439019	-1.001056717	Cysrt1	ENSMUSG00000036731	67859	cysteine rich tail 1
Ptpn18	-2.191136803	1.46E-05	3.55E-05	139	113	77	15	25	26	0.90501525	0.595406587	0.3151005	-1.56283076	-1.40207677	-1.792980542	Ptpn18	ENSMUSG00000026126	19253	protein tyrosine phosphatase, non-receptor type 18
Cda	-2.186370747	1.52E-12	1.11E-10	3681	3483	3256	506	759	978	5.621391267	5.528164209	5.7010325	3.45331871	3.468695099	3.369461926	Cda	ENSMUSG00000028755	72269	cytidine deaminase
Hic1	-2.185748953	1.86E-09	1.97E-08	1574	1368	1174	231	292	336	4.396285988	4.180588101	4.230062373	2.324298845	2.093519823	1.831870935	Hic1	ENSMUSG00000043099	15248	hypermethylated in cancer 1
Nacad	-2.185452184	1.19E-07	5.53E-07	288	384	318	41	79	95	1.950328405	2.350589953	2.348663994	-0.151066877	0.220359448	0.023933228	Nacad	ENSMUSG00000041073	192950	NAC alpha domain containing
Nlrc5	-2.184127135	1.24E-12	9.97E-11	8680	8459	6728	1187	1781	2116	6.858748884	6.808059708	6.747906282	4.682356015	4.698148646	4.481828808	Nlrc5	ENSMUSG00000074151	434341	NLR family, CARD domain containing 5
Sema4f	-2.181757267	3.83E-07	1.48E-06	313	280	211	33	50	98	2.069998818	1.896401494	1.758918247	-0.458721058	-0.429402747	0.068170563	Sema4f	ENSMUSG00000000627	20355	sema domain, immunoglobulin domain (Ig), TM domain, and short cytoplasmic domain
Lama1	-2.180466334	1.04E-06	3.51E-06	159	207	136	23	34	49	1.097580445	1.462544618	1.128615897	-0.967364529	-0.972872316	-0.912421197	Lama1	ENSMUSG00000032796	16772	laminin, alpha 1
Gm10941	-2.180466212	0.000218789	0.000408404	94	106	71	8	15	47	0.345890516	0.504043144	0.199451867	-2.417716017	-2.103394675	-0.970902418	Gm10941	ENSMUSG00000078444	100169878	predicted gene 10941
C1s2	-2.178480779	1.30E-06	4.24E-06	174	182	167	20	43	53	1.22681553	1.277872952	1.423117177	-1.163002877	-0.642510346	-0.802123454	C1s2	ENSMUSG00000079343	317677	complement component 1, s subcomponent 2
Ptprn	-2.172109086	5.30E-10	7.40E-09	972	845	706	116	192	239	3.701481028	3.486242137	3.49709347	1.334580086	1.491155478	1.342753813	Ptprn	ENSMUSG00000026204	19275	protein tyrosine phosphatase, receptor type, N
Arhgef16	-2.170948976	5.08E-08	2.73E-07	369	383	379	58	89	94	2.306716395	2.346838521	2.601187633	0.342679689	0.390335139	0.008880794	Arhgef16	ENSMUSG00000029032	230972	Rho guanine nucleotide exchange factor (GEF) 16
Sytl2	-2.170877362	6.92E-11	1.61E-09	1616	1601	1261	229	286	461	4.434252362	4.407328765	4.333122927	2.311789314	2.063667292	2.286615363	Sytl2	ENSMUSG00000030616	83671	synaptotagmin-like 2
C77370	-2.170576868	4.56E-05	9.87E-05	88	79	80	14	18	18	0.251831812	0.084831709	0.369624462	-1.658050119	-1.855106578	-2.292285925	C77370	ENSMUSG00000046449	245555	expressed sequence C77370
Siglecg	-2.16412003	1.84E-09	1.95E-08	594	687	526	94	127	167	2.991989327	3.18802124	3.073108806	1.033087675	0.898602425	0.829069184	Siglecg	ENSMUSG00000030468	243958	sialic acid binding Ig-like lectin G
Msln	-2.163414363	6.59E-14	1.70E-11	6652	7193	5624	944	1418	1900	6.474895818	6.574198365	6.489362584	4.3521002	4.369520661	4.326592819	Msln	ENSMUSG00000063011	56047	mesothelin
Lrrc4c	-2.153194754	2.02E-05	4.73E-05	113	160	130	25	31	27	0.608767987	1.093167539	1.063953211	-0.850278119	-1.102253137	-1.741164269	Lrrc4c	ENSMUSG00000050587	241568	leucine rich repeat containing 4C
Rdh8	-2.15216632	7.31E-06	1.93E-05	185	157	149	27	44	33	1.314732992	1.066043657	1.259503931	-0.741985034	-0.610070431	-1.464162917	Hsd17b6	ENSMUSG00000025396	27400	hydroxysteroid (17-beta) dehydrogenase 6
Gpr132	-2.147716456	3.94E-10	6.05E-09	852	853	665	119	179	219	3.511599905	3.499819393	3.410891481	1.371212074	1.390537882	1.217411456	Gpr132	ENSMUSG00000021298	56696	G protein-coupled receptor 132
Zfp608	-2.147185195	3.53E-08	2.02E-07	470	436	423	79	86	122	2.654866317	2.533332681	2.759296243	0.784178986	0.341411556	0.380349115	Zfp608	ENSMUSG00000052713	269023	zinc finger protein 608
Aloxe3	-2.133101133	2.55E-06	7.64E-06	210	169	151	32	30	53	1.496616372	1.171607448	1.278626818	-0.502235672	-1.148093636	-0.802123454	Aloxe3	ENSMUSG00000020892	23801	arachidonate lipoxygenase 3
Ppp2r2c	-2.129575576	5.25E-07	1.94E-06	295	274	186	44	52	64	1.984848765	1.865271047	1.577791167	-0.05073897	-0.373880624	-0.536196154	Ppp2r2c	ENSMUSG00000029120	269643	protein phosphatase 2, regulatory subunit B, gamma
H2-Q5	-2.127981992	0.000101544	0.000203555	217	219	171	55	43	33	1.543687891	1.543437377	1.457086701	0.266939256	-0.642510346	-1.464162917	H2-Q5	ENSMUSG00000055413	15016	histocompatibility 2, Q region locus 5
Slfn2	-2.127559334	1.68E-07	7.42E-07	320	259	242	35	67	84	2.101801341	1.784372843	1.955906748	-0.375441787	-0.014186317	-0.150968966	Slfn2	ENSMUSG00000072620	20556	schlafen 2
Trp53cor1	-2.124765436	6.33E-08	3.28E-07	390	402	313	48	99	103	2.386346741	2.416499295	2.325864129	0.073022654	0.542378784	0.139012421	Trp53cor1	ENSMUSG00000085912	100504267	tumor protein p53 pathway corepressor 1
Rasl12	-2.124343313	1.04E-05	2.64E-05	124	159	101	16	24	49	0.741593201	1.084182787	0.702607511	-1.473508754	-1.458716487	-0.912421197	Rasl12	ENSMUSG00000041696	70784	RAS-like, family 12
Bhlha15	-2.122612732	0.000132726	0.000259251	79	102	50	8	18	25	0.098139533	0.449114368	-0.298965719	-2.417716017	-1.855106578	-1.846727419	Bhlha15	ENSMUSG00000052271	17341	basic helix-loop-helix family, member a15
Gata6	-2.120417898	1.04E-06	3.52E-06	442	458	329	41	105	156	2.566457966	2.604182161	2.397590341	-0.151066877	0.626463706	0.731579946	Gata6	ENSMUSG00000005836	14465	GATA binding protein 6
Gpr75	-2.116656573	2.19E-07	9.28E-07	235	256	238	38	58	65	1.658115309	1.767634242	1.931950014	-0.258896737	-0.21908799	-0.514285428	Gpr75	ENSMUSG00000043999	237716	G protein-coupled receptor 75
Neurl1b	-2.116434843	1.24E-07	5.74E-07	650	662	653	87	122	272	3.121744263	3.134627239	3.384655524	0.92224751	0.84110534	1.528369645	Neurl1b	ENSMUSG00000034413	240055	neuralized E3 ubiquitin protein ligase 1B
Sgsm1	-2.112096815	0.000120666	0.000237895	92	83	68	14	11	31	0.315213967	0.155159247	0.137954426	-1.658050119	-2.519193702	-1.550718985	Sgsm1	ENSMUSG00000042216	52850	small G protein signaling modulator 1
Icam5	-2.110883373	3.78E-10	5.85E-09	1311	1171	1019	195	260	323	4.13271327	3.956450981	4.025950047	2.080635041	1.926653696	1.775175441	Icam5	ENSMUSG00000032174	15898	intercellular adhesion molecule 5, telencephalin
Ggct	-2.107386712	7.65E-09	6.04E-08	677	710	663	94	141	252	3.180366518	3.23545735	3.40655182	1.033087675	1.048377653	1.418750224	Ggct	ENSMUSG00000002797	110175	gamma-glutamyl cyclotransferase
Mpped1	-2.106552555	5.54E-07	2.03E-06	183	220	202	28	46	64	1.299141366	1.549978086	1.696300188	-0.690741717	-0.547300154	-0.536196154	Mpped1	ENSMUSG00000041708	223726	metallophosphoesterase domain containing 1
Aox4	-2.105061945	0.000328974	0.000594547	114	100	67	19	27	14	0.6213612	0.420845284	0.11685861	-1.234591254	-1.295061236	-2.62646825	Aox4	ENSMUSG00000038242	71872	aldehyde oxidase 4
Ciita	-2.098989824	0.000253391	0.000467415	112	61	98	19	13	26	0.59606388	-0.282523417	0.659491141	-1.234591254	-2.296366073	-1.792980542	Ciita	ENSMUSG00000022504	12265	class II transactivator
Cyb561a3	-2.097754111	8.27E-13	7.66E-11	6160	6085	5267	839	1294	1970	6.364056394	6.332901169	6.394762904	4.182109675	4.237595707	4.378752753	Cyb561a3	ENSMUSG00000034445	225912	cytochrome b561 family, member A3
Sp6	-2.09619222	5.00E-12	2.34E-10	4280	4076	3896	588	980	1281	5.838846074	5.754923204	5.95986079	3.669736651	3.836959632	3.758357124	Sp6	ENSMUSG00000038560	83395	trans-acting transcription factor 6
Smpd3	-2.095325754	1.22E-07	5.68E-07	348	356	392	48	91	118	2.222432714	2.241676743	2.649731477	0.073022654	0.422052815	0.332788203	Smpd3	ENSMUSG00000031906	58994	sphingomyelin phosphodiesterase 3, neutral
C530005A16Rik	-2.093660976	1.02E-09	1.22E-08	737	737	666	99	170	232	3.302691329	3.289223261	3.413056425	1.10734979	1.31652663	1.300111667	C530005A16Rik	ENSMUSG00000085408	654318	RIKEN cDNA C530005A16 gene
C430002N11Rik	-2.093058	5.41E-05	0.000115044	102	86	78	14	14	34	0.462462302	0.205742705	0.333505065	-1.658050119	-2.196656353	-1.422757456	C430002N11Rik	ENSMUSG00000101581	319707	RIKEN cDNA C430002N11 gene
Fsip1	-2.091469292	0.001223833	0.001990084	73	103	64	5	20	45	-0.014244554	0.463043866	0.051654662	-3.031565593	-1.71053355	-1.031854761	Fsip1	ENSMUSG00000027344	71313	fibrous sheath-interacting protein 1
Rbp4	-2.089586305	0.000455073	0.000797195	68	95	65	7	30	19	-0.115085891	0.34764984	0.073718376	-2.594808743	-1.148093636	-2.219574213	Rbp4	ENSMUSG00000024990	19662	retinol binding protein 4, plasma
Adrb2	-2.089007723	5.04E-11	1.27E-09	2886	2354	2068	367	534	789	5.270479441	4.963160941	5.046394181	2.990669532	2.962214381	3.060127479	Adrb2	ENSMUSG00000045730	11555	adrenergic receptor, beta 2
Disp1	-2.087415202	7.57E-10	9.69E-09	2044	1734	1517	245	468	517	4.773021942	4.522385309	4.599604218	2.408953996	2.772253814	2.451558053	Prss30	ENSMUSG00000024124	30943	protease, serine 30
Cbr2	-2.081291588	6.80E-12	2.93E-10	6233	6443	6002	1002	1308	2062	6.381049844	6.415362381	6.58319495	4.438065882	4.253109008	4.444557522	Cbr2	ENSMUSG00000025150	12409	carbonyl reductase 2
1700003E16Rik	-2.078837867	6.72E-09	5.43E-08	1133	975	959	168	266	265	3.922376899	3.692449265	3.938477388	1.86640025	1.959446773	1.490942926	1700003E16Rik	ENSMUSG00000030030	71837	RIKEN cDNA 1700003E16 gene
Mslnl	-2.077402323	2.33E-05	5.40E-05	248	218	230	51	31	85	1.735454395	1.536866879	1.882809021	0.159339525	-1.102253137	-0.134163061	Mslnl	ENSMUSG00000041062	328783	mesothelin-like
Ccdc17	-2.076508056	1.43E-06	4.61E-06	486	426	263	77	84	93	2.703054787	2.499941038	2.075540831	0.747493711	0.307849125	-0.006330349	Ccdc17	ENSMUSG00000034035	622665	coiled-coil domain containing 17
Scml4	-2.073966179	5.62E-05	0.000119077	112	148	77	23	18	32	0.59606388	0.98147113	0.3151005	-0.967364529	-1.855106578	-1.50679192	Scml4	ENSMUSG00000044770	268297	sex comb on midleg-like 4 (Drosophila)
Rnase4	-2.071399212	2.83E-13	3.81E-11	4743	4928	4227	743	1060	1435	5.987000208	6.028705823	6.077475454	4.006946873	3.950062051	3.921974925	Rnase4	ENSMUSG00000021876	58809	ribonuclease, RNase A family 4
P2rx6	-2.069172183	1.27E-08	8.97E-08	589	602	624	104	141	171	2.979815888	2.997791962	3.31920971	1.177975703	1.048377653	0.862947656	P2rx6	ENSMUSG00000022758	18440	purinergic receptor P2X, ligand-gated ion channel, 6
Aif1l	-2.068298612	2.03E-13	3.07E-11	10301	11193	9377	1673	2376	3135	7.105738559	7.212052793	7.226801165	5.177241744	5.113798337	5.048656601	Aif1l	ENSMUSG00000001864	108897	allograft inflammatory factor 1-like
Fibcd1	-2.065310362	1.64E-08	1.10E-07	468	500	506	71	113	168	2.648727991	2.730479638	3.017279597	0.631485036	0.731457426	0.837613677	Fibcd1	ENSMUSG00000026841	98970	fibrinogen C domain containing 1
L3hypdh	-2.065108684	3.95E-12	1.99E-10	2538	2414	2104	376	517	767	5.085172978	4.999455974	5.071282093	3.025560441	2.915625349	3.019399203	L3hypdh	ENSMUSG00000019718	67217	L-3-hydroxyproline dehydratase (trans-)
Nid2	-2.064936777	5.58E-14	1.54E-11	13338	12557	10187	1886	2742	3830	7.47846265	7.377932849	7.346321204	5.350070034	5.320413105	5.337423235	Nid2	ENSMUSG00000021806	18074	nidogen 2
Atp13a2	-2.063442336	1.33E-12	1.05E-10	9096	8444	8084	1408	1946	2638	6.926278023	6.80549949	7.012765928	4.928558183	4.825905928	4.799752323	Atp13a2	ENSMUSG00000036622	74772	ATPase type 13A2
Gm12603	-2.059739357	7.97E-07	2.79E-06	244	275	183	36	64	60	1.71209627	1.870506327	1.554444686	-0.335538148	-0.079306119	-0.627326521	Gm12603	ENSMUSG00000085183	100040617	predicted gene 12603
Bcl2l15	-2.059500123	1.32E-07	6.09E-07	284	311	242	45	55	98	1.930225177	2.047340664	1.955906748	-0.018789082	-0.29440926	0.068170563	Bcl2l15	ENSMUSG00000044165	229672	BCLl2-like 15
Arnt2	-2.057449911	2.77E-10	4.62E-09	1096	1081	937	146	254	350	3.874522446	3.841186283	3.905026991	1.664753702	1.893097847	1.890534438	Arnt2	ENSMUSG00000015709	11864	aryl hydrocarbon receptor nuclear translocator 2
Dtd1	-2.057110253	1.49E-08	1.02E-07	470	551	456	71	107	180	2.654866317	2.870318144	2.867453434	0.631485036	0.653437129	0.936384971	Dtd1	ENSMUSG00000027430	66044	D-tyrosyl-tRNA deacylase 1
Ccl2	-2.055906482	4.44E-13	5.32E-11	13416	15137	12951	2200	3243	4361	7.486874222	7.647499334	7.692628586	5.572172199	5.562434356	5.524676142	Ccl2	ENSMUSG00000035385	20296	chemokine (C-C motif) ligand 2
Acad12	-2.053062946	9.05E-08	4.42E-07	406	465	390	60	85	168	2.44419793	2.626014563	2.642368687	0.391050729	0.324727937	0.837613677	Acad12	ENSMUSG00000042647	338350	acyl-Coenzyme A dehydrogenase family, member 12
Mdga1	-2.05296684	2.59E-12	1.52E-10	2847	2722	2410	404	647	848	5.250857905	5.172624901	5.267103171	3.129008711	3.238681196	3.163995551	Mdga1	ENSMUSG00000043557	74762	MAM domain containing glycosylphosphatidylinositol anchor 1
Palm3	-2.050832511	3.73E-09	3.43E-08	624	569	519	89	145	168	3.062948628	2.916605853	3.053813374	0.954794514	1.088462133	0.837613677	Palm3	ENSMUSG00000047986	74337	paralemmin 3
Mafb	-2.05058732	0.0002185	0.000407925	92	86	94	8	23	43	0.315213967	0.205742705	0.599921914	-2.417716017	-1.517671049	-1.095496309	Mafb	ENSMUSG00000074622	16658	v-maf musculoaponeurotic fibrosarcoma oncogene family, protein B (avian)
Slc23a3	-2.049610699	4.06E-05	8.89E-05	174	150	87	28	22	41	1.22681553	1.000698117	0.489363616	-0.690741717	-1.579137762	-1.162075355	Slc23a3	ENSMUSG00000026205	22626	solute carrier family 23 (nucleobase transporters), member 3
A630033H20Rik	-2.042273377	0.00072756	0.001225726	105	94	84	27	10	33	0.50385765	0.332554331	0.439258596	-0.741985034	-2.645001603	-1.464162917	A630033H20Rik	ENSMUSG00000054293	213438	RIKEN cDNA A630033H20 gene
Ngef	-2.041328496	1.77E-07	7.73E-07	434	400	406	81	78	133	2.540170383	2.409322978	2.700244986	0.819954503	0.202206326	0.503592028	Ngef	ENSMUSG00000026259	53972	neuronal guanine nucleotide exchange factor
Pla2r1	-2.040145154	2.02E-06	6.25E-06	213	224	165	26	42	84	1.516978224	1.575848363	1.405827689	-0.795115714	-0.675696506	-0.150968966	Pla2r1	ENSMUSG00000054580	18779	phospholipase A2 receptor 1
Masp2	-2.038093999	4.16E-05	9.07E-05	95	125	65	15	19	30	0.3609876	0.73970975	0.073718376	-1.56283076	-1.781009857	-1.596025654	Masp2	ENSMUSG00000028979	17175	mannan-binding lectin serine peptidase 2
Dpysl5	-2.037544419	1.68E-06	5.32E-06	394	269	304	53	93	78	2.401028469	1.83880583	2.283893752	0.214142289	0.453088151	-0.256135646	Dpysl5	ENSMUSG00000029168	65254	dihydropyrimidinase-like 5
Tek	-2.0369929	8.28E-05	0.000169263	123	100	89	22	15	37	0.730010999	0.420845284	0.521825601	-1.029675411	-2.103394675	-1.305226731	Tek	ENSMUSG00000006386	21687	endothelial-specific receptor tyrosine kinase
Abcb1a	-2.036365499	1.68E-11	5.66E-10	2530	2338	1924	347	572	704	5.080620202	4.953326044	4.942313189	2.909973667	3.061215151	2.895974121	Abcb1a	ENSMUSG00000040584	18671	ATP-binding cassette, sub-family B (MDR/TAP), member 1A
9330175E14Rik	-2.032420167	2.11E-05	4.93E-05	165	132	104	27	22	44	1.15067157	0.817668888	0.744472611	-0.741985034	-1.579137762	-1.063324636	9330175E14Rik	NA	320377	RIKEN cDNA 9330175E14 gene
Erc2	-2.027943292	5.90E-06	1.60E-05	161	145	112	21	27	54	1.11549545	0.952141489	0.850514186	-1.094799501	-1.295061236	-0.775818015	Erc2	ENSMUSG00000040640	238988	ELKS/RAB6-interacting/CAST family member 2
Uroc1	-2.0276992	2.34E-05	5.43E-05	93	96	93	16	19	31	0.330633775	0.362589032	0.584637196	-1.473508754	-1.781009857	-1.550718985	Uroc1	ENSMUSG00000034456	243537	urocanase domain containing 1
Loxl2	-2.023089869	3.64E-12	1.89E-10	2502	2611	2133	372	604	783	5.064571381	5.112584437	5.09102307	3.01015745	3.139618523	3.049133307	Loxl3	ENSMUSG00000000693	16950	lysyl oxidase-like 3
Clec2l	-2.02225161	4.50E-07	1.70E-06	231	227	214	35	61	64	1.633459792	1.594951112	1.779201192	-0.375441787	-0.147504793	-0.536196154	Clec2l	ENSMUSG00000079598	665180	C-type lectin domain family 2, member L
Efnb2	-2.021951071	8.71E-10	1.08E-08	3820	3830	3062	635	939	952	5.674851013	5.665137909	5.612431032	3.780557944	3.77536563	3.330643166	Efnb2	ENSMUSG00000001300	13642	ephrin B2
Csf2	-2.020153036	1.83E-06	5.72E-06	342	350	327	53	113	81	2.197418739	2.217228673	2.38881717	0.214142289	0.731457426	-0.202594239	Csf2	ENSMUSG00000018916	12981	colony stimulating factor 2 (granulocyte-macrophage)
Fas	-2.019393617	1.82E-13	2.85E-11	6882	7609	5876	1086	1604	2253	6.523927845	6.65529987	6.552590608	4.554134379	4.547222348	4.572280745	Fas	ENSMUSG00000024778	14102	Fas (TNF receptor superfamily member 6)
Rbm47	-2.01704897	6.07E-08	3.16E-07	453	507	380	58	122	155	2.60183867	2.750494674	2.60498032	0.342679689	0.84110534	0.722381723	Rbm47	ENSMUSG00000070780	245945	RNA binding motif protein 47
Snai3	-2.016841557	8.78E-11	1.90E-09	1931	1693	1553	279	441	527	4.691018753	4.48788497	4.633421376	2.595967248	2.686707509	2.479125672	Snai3	ENSMUSG00000006587	30927	snail family zinc finger 3
9430076C15Rik	-2.016313485	7.13E-05	0.000147663	106	85	67	14	15	33	0.517396295	0.189077839	0.11685861	-1.658050119	-2.103394675	-1.464162917	Creb5	ENSMUSG00000053007	231991	cAMP responsive element binding protein 5
Gm4952	-2.015831632	0.000106823	0.000212823	121	75	81	10	25	34	0.706563853	0.010899418	0.387350617	-2.117846781	-1.40207677	-1.422757456	Gm4952	ENSMUSG00000071633	240549	predicted gene 4952
Akr1b10	-2.015451022	2.94E-10	4.84E-09	2249	2437	2010	412	464	739	4.910842112	5.013130505	5.005371384	3.157252287	2.759895939	2.96584271	Akr1b10	ENSMUSG00000061758	67861	aldo-keto reductase family 1, member B10 (aldose reductase)
Dnm3	-2.015391137	4.11E-05	8.97E-05	110	125	96	12	27	48	0.570315048	0.73970975	0.630013959	-1.869707915	-1.295061236	-0.941365503	Dnm3	ENSMUSG00000040265	103967	dynamin 3
Ddr1	-2.01402528	1.00E-12	8.82E-11	13407	13094	11749	2032	3314	3953	7.485906156	7.438341852	7.552113187	5.457604675	5.593669648	5.383011033	Ddr1	ENSMUSG00000003534	12305	discoidin domain receptor family, member 1
Dgka	-2.009775681	1.07E-12	9.05E-11	8374	8212	6571	1348	1811	2409	6.806977209	6.765311712	6.713846073	4.865761285	4.722234603	4.668812064	Dgka	ENSMUSG00000025357	13139	diacylglycerol kinase, alpha
Vwce	-2.008573674	1.59E-05	3.84E-05	124	142	94	24	26	32	0.741593201	0.922203189	0.599921914	-0.907633835	-1.347576962	-1.50679192	Vwce	ENSMUSG00000043789	71768	von Willebrand factor C and EGF domains
Cfap74	-2.005870379	5.53E-05	0.000117417	124	131	80	21	31	24	0.741593201	0.806786486	0.369624462	-1.094799501	-1.102253137	-1.902554351	Cfap74	ENSMUSG00000078490	544678	cilia and flagella associated protein 74
Calhm2	-2.003223321	4.24E-13	5.21E-11	3788	3928	3307	597	902	1204	5.662718093	5.701578375	5.723448773	3.691627162	3.717429271	3.669018846	Calhm2	ENSMUSG00000033033	72691	calcium homeostasis modulator 2
Park2	-2.000728963	1.80E-05	4.28E-05	172	120	142	18	45	45	1.210238557	0.681327118	1.190504255	-1.309918261	-0.578343935	-1.031854761	Park2	ENSMUSG00000023826	50873	Parkinson disease (autosomal recessive, juvenile) 2, parkin
Xdh	-2.000529294	1.30E-05	3.19E-05	161	122	145	24	41	36	1.11549545	0.704964432	1.220480516	-0.907633835	-0.709664052	-1.343349597	Xdh	ENSMUSG00000024066	22436	xanthine dehydrogenase
Itga10	-1.997809215	3.33E-10	5.30E-09	983	1047	892	162	250	300	3.71769851	3.795127616	3.834090636	1.814140893	1.870285684	1.66906254	Itga10	ENSMUSG00000090210	213119	integrin, alpha 10
Mpp3	-1.995975991	9.71E-05	0.000195598	98	97	65	13	15	38	0.405353484	0.377375113	0.073718376	-1.760000954	-2.103394675	-1.268085372	Mpp3	ENSMUSG00000052373	13384	membrane protein, palmitoylated 3 (MAGUK p55 subfamily member 3)
Ttyh2	-1.995923549	7.51E-13	7.27E-11	3627	3682	3130	561	823	1211	5.600076458	5.608299371	5.644110309	3.601998735	3.585343747	3.67737301	Ttyh2	ENSMUSG00000034714	117160	tweety family member 2
Sema4a	-1.995515666	0.001237542	0.002009795	141	142	101	9	67	41	0.925470352	0.922203189	0.702607511	-2.260004274	-0.014186317	-1.162075355	Sema4a	ENSMUSG00000028064	20351	sema domain, immunoglobulin domain (Ig), transmembrane domain (TM) and short cytoplasmic domain, (semaphorin) 4A
Cd68	-1.994049122	8.99E-10	1.11E-08	970	954	856	141	214	350	3.698512708	3.661071191	3.774718127	1.614709586	1.646910637	1.890534438	Cd68	ENSMUSG00000018774	12514	CD68 antigen
Spry4	-1.993517118	3.17E-06	9.26E-06	179	212	171	23	54	67	1.267443312	1.496802799	1.457086701	-0.967364529	-0.32041632	-0.471437693	Spry4	ENSMUSG00000024427	24066	sprouty homolog 4 (Drosophila)
Slc16a3	-1.99047979	1.75E-05	4.18E-05	135	161	156	25	48	36	0.86321387	1.102096682	1.325353644	-0.850278119	-0.48714746	-1.343349597	Slc16a3	ENSMUSG00000025161	80879	solute carrier family 16 (monocarboxylic acid transporters), member 3
Hoxb6	-1.990476801	1.93E-06	6.02E-06	259	263	218	54	57	63	1.797805072	1.806393096	1.805809019	0.240782279	-0.243760711	-0.558444785	Hoxb6	ENSMUSG00000000690	15414	homeobox B6
Nipal4	-1.988856801	8.59E-12	3.49E-10	2450	2326	2103	377	534	807	5.034284333	4.945905623	5.070596528	3.02938563	2.962214381	3.092616069	Nipal4	ENSMUSG00000020411	214112	NIPA-like domain containing 4
Foxd1	-1.987920797	2.30E-11	7.16E-10	2956	2599	2540	436	643	946	5.305041843	5.105941347	5.342871295	3.238809684	3.229747721	3.32153469	Foxd1	ENSMUSG00000078302	15229	forkhead box D1
Hck	-1.981937536	2.12E-09	2.16E-08	977	972	1015	176	232	323	3.708875218	3.688008251	4.020280679	1.933259055	1.762917043	1.775175441	Hck	ENSMUSG00000003283	15162	hemopoietic cell kinase
Sema4d	-1.980927677	1.60E-08	1.08E-07	819	759	684	144	195	207	3.454682295	3.331597788	3.451479965	1.644943876	1.513411179	1.136621963	Sema4d	ENSMUSG00000021451	20354	sema domain, immunoglobulin domain (Ig), transmembrane domain (TM) and short cytoplasmic domain, (semaphorin) 4D
C1rb	-1.980917304	3.49E-07	1.37E-06	259	265	287	42	73	86	1.797805072	1.817278454	2.201122304	-0.116843135	0.107847728	-0.117550675	C1rb	ENSMUSG00000098470	667277	complement component 1, r subcomponent B
Ankrd33b	-1.980590326	0.000234298	0.000434905	75	84	84	20	13	25	0.02419779	0.172218221	0.439258596	-1.163002877	-2.296366073	-1.846727419	Ankrd33b	ENSMUSG00000022237	67434	ankyrin repeat domain 33B
Trim7	-1.980556311	2.48E-11	7.54E-10	3297	3179	2722	566	698	997	5.462495869	5.396449201	5.442676116	3.614785114	3.347983946	3.397183192	Trim7	ENSMUSG00000040350	94089	tripartite motif-containing 7
Pdlim4	-1.976775133	2.53E-08	1.55E-07	686	823	669	137	190	200	3.199389615	3.44823209	3.419531835	1.5733856	1.476125289	1.087317252	Pdlim4	ENSMUSG00000020388	30794	PDZ and LIM domain 4
Ppef1	-1.976148776	1.21E-06	4.00E-06	270	342	293	38	76	127	1.85757233	2.183973122	2.230881004	-0.258896737	0.165200119	0.437676745	Ppef1	ENSMUSG00000062168	237178	protein phosphatase with EF hand calcium-binding domain 1
Fgfbp3	-1.975857447	3.15E-12	1.73E-10	2660	2568	2201	426	591	832	5.152879477	5.088637096	5.136279681	3.205385917	3.108279232	3.136558765	Fgfbp3	ENSMUSG00000047632	72514	fibroblast growth factor binding protein 3
Jup	-1.968798323	1.78E-13	2.85E-11	14949	14204	12843	2304	3625	4630	7.642956897	7.555724004	7.680548161	5.638789956	5.723040647	5.611003492	Jup	ENSMUSG00000001552	16480	junction plakoglobin
Gm4961	-1.967035422	1.69E-06	5.33E-06	218	240	231	37	71	63	1.550288751	1.674925861	1.889043966	-0.296708567	0.068305663	-0.558444785	Gm4961	ENSMUSG00000104667	242914	kinesin superfamily protein 2C pseudogene
Pisd-ps3	-1.964310786	5.20E-13	5.58E-11	26019	24152	19179	4023	5525	7763	8.442429828	8.321524555	8.259060432	6.442745291	6.330900743	6.356436422	Pisd-ps3	NA	66776	phosphatidylserine decarboxylase, pseudogene 3
Tjp3	-1.964299688	2.91E-07	1.17E-06	401	366	301	51	112	108	2.426367372	2.281524804	2.269627839	0.159339525	0.718743541	0.206537884	Tjp3	ENSMUSG00000034917	27375	tight junction protein 3
Adgrb2	-1.96413816	1.22E-09	1.39E-08	710	689	646	115	164	237	3.248924678	3.192208599	3.36912795	1.32215977	1.26498857	1.330698409	Adgrb2	ENSMUSG00000028782	230775	adhesion G protein-coupled receptor B2
Fbln1	-1.96322267	8.86E-13	8.02E-11	3593	3419	2950	548	819	1156	5.586492644	5.501416468	5.5586876	3.568213877	3.578323103	3.610391721	Fbln1	ENSMUSG00000006369	14114	fibulin 1
Ntn3	-1.962696731	2.37E-08	1.47E-07	448	526	389	85	102	149	2.585864012	2.803461766	2.638673152	0.888949271	0.585033751	0.665925715	Ntn3	ENSMUSG00000036473	18209	netrin 3
Akr1b8	-1.961553713	2.97E-13	3.87E-11	9533	9405	8008	1530	2092	3228	6.993968344	6.960982142	6.999140086	5.048388865	4.930226663	5.090813905	Akr1b8	ENSMUSG00000029762	14187	aldo-keto reductase family 1, member B8
Plekha6	-1.961438364	4.22E-10	6.32E-09	1486	1484	1307	229	405	445	4.313342169	4.297922658	4.384778023	2.311789314	2.564133547	2.235804897	Plekha6	ENSMUSG00000041757	240753	pleckstrin homology domain containing, family A member 6
A4galt	-1.960499714	1.97E-11	6.39E-10	1827	1888	1611	310	416	619	4.611192364	4.645067466	4.686290326	2.747631482	2.602703574	2.710715959	A4galt	ENSMUSG00000047878	239559	alpha 1,4-galactosyltransferase
Htatip2	-1.954769446	3.29E-06	9.58E-06	276	277	270	32	86	106	1.889158303	1.880920236	2.113311434	-0.502235672	0.341411556	0.179905749	Htatip2	ENSMUSG00000039745	53415	HIV-1 Tat interactive protein 2
Fam117a	-1.952379368	2.41E-09	2.39E-08	626	667	539	111	146	201	3.067557425	3.145465298	3.108272571	1.271380784	1.098311619	1.094464788	Fam117a	ENSMUSG00000038893	215512	family with sequence similarity 117, member A
Bach2	-1.947327676	3.77E-06	1.08E-05	298	337	234	36	102	92	1.999394041	2.162792272	1.907588737	-0.335538148	0.585033751	-0.021703581	Bach2	ENSMUSG00000040270	12014	BTB and CNC homology, basic leucine zipper transcription factor 2
Arg2	-1.937342788	1.72E-06	5.41E-06	192	203	191	37	53	55	1.368013771	1.434540033	1.615881531	-0.296708567	-0.346900822	-0.749983641	Arg2	ENSMUSG00000021125	11847	arginase type II
Duox1	-1.936926987	2.12E-09	2.16E-08	1116	1083	944	187	295	311	3.900586645	3.843850364	3.915754663	2.020406351	2.108217596	1.720786764	Duox1	ENSMUSG00000033268	99439	dual oxidase 1
Itgb3	-1.935895664	2.25E-09	2.27E-08	1325	1212	1119	214	349	363	4.148025606	4.006054965	4.160893653	2.214341679	2.349994362	1.942951189	Itgb3	ENSMUSG00000020689	16416	integrin beta 3
Plb1	-1.935240962	3.01E-07	1.21E-06	439	357	315	76	76	127	2.556656168	2.245711444	2.335027359	0.728795221	0.165200119	0.437676745	Plb1	ENSMUSG00000029134	665270	phospholipase B1
Fdxr	-1.933594756	5.20E-13	5.58E-11	4556	4730	3679	725	1119	1489	5.928981343	5.969556885	5.877200201	3.971597291	4.028137939	3.975218929	Fdxr	ENSMUSG00000018861	14149	ferredoxin reductase
Sash1	-1.930190674	7.38E-13	7.23E-11	9333	9169	7708	1498	2369	2855	6.963382387	6.924322828	6.944060916	5.017908059	5.109543448	4.913742602	Sash1	ENSMUSG00000015305	70097	SAM and SH3 domain containing 1
Irf8	-1.927630839	2.43E-05	5.62E-05	98	131	116	16	29	46	0.405353484	0.806786486	0.900748461	-1.473508754	-1.195438616	-1.001056717	Irf8	ENSMUSG00000041515	15900	interferon regulatory factor 8
Lpin1	-1.925667895	3.02E-12	1.70E-10	6309	6087	5280	1074	1540	1900	6.398531521	6.333375188	6.398318774	4.538114012	4.488514969	4.326592819	Lpin1	ENSMUSG00000020593	14245	lipin 1
Artn	-1.925241902	9.68E-10	1.17E-08	883	969	791	148	246	286	3.563096853	3.683553523	3.660908009	1.684295197	1.847107007	1.600430475	Artn	ENSMUSG00000028539	11876	artemin
Myo5c	-1.925089155	2.82E-05	6.40E-05	264	288	228	57	86	53	1.825279315	1.936890624	1.870257708	0.317872081	0.341411556	-0.802123454	Myo5c	ENSMUSG00000033590	208943	myosin VC
Sox9	-1.921351259	5.61E-09	4.73E-08	1257	1258	949	211	331	334	4.072080401	4.059750568	3.923368739	2.194036641	2.273817029	1.823292261	Sox9	ENSMUSG00000000567	20682	SRY (sex determining region Y)-box 9
Dock8	-1.919647745	4.73E-07	1.77E-06	311	351	223	43	72	120	2.060782115	2.221332231	1.838393218	-0.083412475	0.088212164	0.356764641	Dock8	ENSMUSG00000052085	76088	dedicator of cytokinesis 8
Chd5	-1.91608221	1.12E-09	1.32E-08	1229	1197	848	194	287	352	4.039608414	3.988104395	3.761185715	2.073242532	2.068685808	1.898723553	Wrb	ENSMUSG00000023147	71446	tryptophan rich basic protein
Ccno	-1.911045662	2.84E-07	1.15E-06	690	629	523	84	147	290	3.207764472	3.060978405	3.064870915	0.872007441	1.108094317	1.620375047	Ccno	ENSMUSG00000042417	218630	cyclin O
Ak3	-1.905884252	1.42E-13	2.50E-11	8186	8164	7156	1327	2023	2878	6.774223159	6.756855374	6.836870565	4.843120277	4.881863047	4.925313017	Ak4	ENSMUSG00000028527	11639	adenylate kinase 4
H2-M3	-1.905371493	2.02E-06	6.24E-06	248	298	203	33	79	90	1.735454395	1.985954595	1.703393483	-0.458721058	0.220359448	-0.052950396	H2-M3	ENSMUSG00000016206	14991	histocompatibility 2, M region locus 3
Sstr2	-1.901895833	8.57E-06	2.22E-05	172	183	166	39	33	63	1.210238557	1.285731985	1.414498333	-0.222050665	-1.014723174	-0.558444785	Sstr2	ENSMUSG00000047904	20606	somatostatin receptor 2
Slco5a1	-1.896062742	0.000306619	0.000558206	88	105	80	9	34	36	0.251831812	0.490505766	0.369624462	-2.260004274	-0.972872316	-1.343349597	Slco5a1	ENSMUSG00000025938	240726	solute carrier organic anion transporter family, member 5A1
Tmem25	-1.891387982	3.13E-07	1.25E-06	385	306	265	64	80	99	2.367781946	2.024038713	2.086433712	0.483183478	0.238286988	0.082619958	Tmem25	ENSMUSG00000002032	71687	transmembrane protein 25
BB557941	-1.890909862	0.000299315	0.000546322	78	92	87	24	17	23	0.080006337	0.301881035	0.489363616	-0.907633835	-1.933215921	-1.96062884	BB557941	ENSMUSG00000084938	767815	expressed sequence BB557941
Rtkn	-1.887225754	8.07E-11	1.77E-09	3396	3448	3148	662	817	1143	5.505164897	5.513598016	5.652380851	3.840571772	3.574799928	3.594094802	Rtkn	ENSMUSG00000034930	20166	rhotekin
Nfe2l3	-1.886831346	4.14E-06	1.17E-05	195	147	183	29	44	66	1.390259481	0.971760684	1.554444686	-0.641256261	-0.610070431	-0.492702495	Nfe2l3	ENSMUSG00000029832	18025	nuclear factor, erythroid derived 2, like 3
Pxdc1	-1.884373155	3.09E-11	8.87E-10	4628	4399	4253	801	1069	1707	5.951597229	5.8649169	6.086320342	4.115294641	3.962248481	4.172171885	Pxdc1	ENSMUSG00000021411	66895	PX domain containing 1
1810011O10Rik	-1.88202146	1.84E-10	3.40E-09	3174	3246	2596	587	681	1134	5.407662113	5.426529146	5.374322293	3.667283742	3.312461929	3.582703502	1810011O10Rik	ENSMUSG00000056313	69068	RIKEN cDNA 1810011O10 gene
Tspan13	-1.88040643	3.11E-05	6.99E-05	166	198	173	20	57	81	1.159333203	1.398752103	1.473776155	-1.163002877	-0.243760711	-0.202594239	Tspan13	ENSMUSG00000020577	66109	tetraspanin 13
Zbtb7c	-1.878574615	1.00E-06	3.41E-06	263	222	224	42	52	99	1.819826164	1.562971212	1.844822668	-0.116843135	-0.373880624	0.082619958	Zbtb7c	ENSMUSG00000044646	207259	zinc finger and BTB domain containing 7C
Nat9	-1.873630967	1.48E-11	5.16E-10	4509	4878	4249	873	1116	1656	5.91402461	6.013996542	6.084963115	4.239376568	4.024268305	4.128446493	Nat9	ENSMUSG00000015542	66176	N-acetyltransferase 9 (GCN5-related, putative)
Ccdc88c	-1.872780141	2.27E-06	6.92E-06	326	357	212	51	97	84	2.128513564	2.245711444	1.765710962	0.159339525	0.51322499	-0.150968966	Ccdc88c	ENSMUSG00000021182	68339	coiled-coil domain containing 88C
Sec16b	-1.87087399	1.16E-07	5.43E-07	344	408	277	58	99	115	2.205805012	2.437816518	2.150118357	0.342679689	0.542378784	0.296059445	Sec16b	ENSMUSG00000026589	89867	SEC16 homolog B (S. cerevisiae)
Galnt3	-1.869167091	1.55E-05	3.75E-05	241	164	137	41	40	55	1.694326096	1.128557238	1.139116752	-0.151066877	-0.744450671	-0.749983641	Galnt3	ENSMUSG00000026994	14425	UDP-N-acetyl-alpha-D-galactosamine:polypeptide N-acetylgalactosaminyltransferase 3
Nhsl2	-1.868968832	7.04E-08	3.57E-07	332	338	262	55	85	107	2.154740175	2.167053392	2.070063392	0.266939256	0.324727937	0.193283269	Nhsl2	ENSMUSG00000079481	100042480	NHS-like 2
Rgs16	-1.866530926	8.72E-07	3.02E-06	433	385	330	65	79	184	2.536850499	2.354331656	2.401957001	0.505325816	0.220359448	0.967861113	Rgs16	ENSMUSG00000026475	19734	regulator of G-protein signaling 16
Bfsp2	-1.865368006	4.47E-06	1.26E-05	176	201	198	27	54	81	1.243204191	1.420331214	1.667573019	-0.741985034	-0.32041632	-0.202594239	Bfsp2	ENSMUSG00000032556	107993	beaded filament structural protein 2, phakinin
Car12	-1.863152097	4.37E-12	2.14E-10	3237	3194	2791	535	866	1098	5.436007959	5.403238213	5.478779529	3.53361884	3.658733599	3.536216972	Car12	ENSMUSG00000032373	76459	carbonic anhydrase 12
Myo16	-1.862789291	8.60E-05	0.000175161	125	100	79	17	35	27	0.75308316	0.420845284	0.351677797	-1.389396011	-0.932201353	-1.741164269	Myo16	ENSMUSG00000039057	244281	myosin XVI
Abcd4	-1.861793195	2.31E-11	7.16E-10	2567	2472	2225	457	660	827	5.101557387	5.033694016	5.15191959	3.306575997	3.267338762	3.127876649	Abcd4	ENSMUSG00000021240	19300	ATP-binding cassette, sub-family D (ALD), member 4
Itga2b	-1.861622803	4.35E-10	6.45E-09	2030	1872	1601	376	460	621	4.76311164	4.632796133	4.677312109	3.025560441	2.747431292	2.71535974	Itga2b	ENSMUSG00000034664	16399	integrin alpha 2b
Fgf18	-1.861021126	2.10E-08	1.33E-07	1285	1299	1216	254	381	370	4.103837572	4.105981306	4.280735491	2.460864068	2.476220811	1.970406113	Fgf18	ENSMUSG00000057967	14172	fibroblast growth factor 18
Rell2	-1.860328466	2.90E-05	6.57E-05	228	155	166	22	62	73	1.614687637	1.047673554	1.414498333	-1.029675411	-0.124411835	-0.350038627	Rell2	ENSMUSG00000044024	225392	RELT-like 2
Pglyrp2	-1.855407382	0.001820033	0.002870052	49	81	70	6	19	38	-0.579261754	0.120423971	0.179242596	-2.796722105	-1.781009857	-1.268085372	Pglyrp2	ENSMUSG00000079563	57757	peptidoglycan recognition protein 2
Wnt9a	-1.854334106	1.14E-12	9.41E-11	9050	8928	7983	1467	2440	3241	6.918964417	6.88590001	6.994629624	4.987752667	5.152129132	5.096609936	Wnt9a	ENSMUSG00000000126	216795	wingless-type MMTV integration site family, member 9A
Zbtb42	-1.854255201	7.43E-12	3.13E-10	2505	2432	2045	400	638	876	5.066299462	5.010168787	5.03026581	3.114676833	3.218502521	3.210789103	Zbtb42	ENSMUSG00000037638	382639	zinc finger and BTB domain containing 42
A330074K22Rik	-1.85323006	2.80E-07	1.14E-06	428	381	329	57	125	133	2.520135507	2.339306265	2.397590341	0.317872081	0.875877823	0.503592028	A330074K22Rik	ENSMUSG00000097960	434353	RIKEN cDNA A330074K22 gene
Rhbdl3	-1.853027893	2.02E-08	1.30E-07	692	667	575	97	180	271	3.21193374	3.145465298	3.201400522	1.078102039	1.398531792	1.523082049	Rhbdl3	ENSMUSG00000017692	246104	rhomboid, veinlet-like 3 (Drosophila)
Sec31b	-1.852492106	0.000273702	0.000502467	185	190	119	15	56	85	1.314732992	1.339578171	0.937308601	-1.56283076	-0.268862733	-0.134163061	Sec31b	ENSMUSG00000051984	240667	Sec31 homolog B (S. cerevisiae)
Iqgap2	-1.849000605	2.32E-06	7.05E-06	191	176	136	29	48	57	1.360521649	1.229797901	1.128615897	-0.641256261	-0.48714746	-0.699662648	Iqgap2	ENSMUSG00000021676	544963	IQ motif containing GTPase activating protein 2
Nrxn2	-1.848276582	6.08E-05	0.00012781	102	77	87	15	23	33	0.462462302	0.048339103	0.489363616	-1.56283076	-1.517671049	-1.464162917	Nrxn2	ENSMUSG00000033768	18190	neurexin II
Krt80	-1.845698976	5.26E-09	4.49E-08	982	1032	908	204	262	313	3.716231704	3.774330593	3.859713913	2.145516399	1.937667752	1.729995129	Krt80	ENSMUSG00000037185	74127	keratin 80
Ttc25	-1.840771468	0.000125286	0.000246047	88	104	80	13	34	28	0.251831812	0.476840158	0.369624462	-1.760000954	-0.972872316	-1.691144701	Ttc25	ENSMUSG00000006784	74407	tetratricopeptide repeat domain 25
Arhgef19	-1.839872455	1.91E-11	6.22E-10	3881	3762	2978	660	1012	1205	5.697700505	5.639300663	5.572312313	3.836210912	3.88326994	3.670215264	Arhgef19	ENSMUSG00000028919	213649	Rho guanine nucleotide exchange factor (GEF) 19
Tspyl5	-1.838950405	2.12E-07	9.05E-07	348	343	238	58	87	102	2.222432714	2.18817223	1.931950014	0.342679689	0.357904445	0.125119607	Tspyl5	ENSMUSG00000038984	239364	testis-specific protein, Y-encoded-like 5
Lyplal1	-1.838202703	7.78E-07	2.73E-06	285	270	283	46	68	126	1.935277307	1.844137855	2.180936584	0.012468547	0.006883078	0.426392012	Lyplal1	ENSMUSG00000039246	226791	lysophospholipase-like 1
Cryab	-1.838102971	3.48E-12	1.85E-10	4611	4890	4235	836	1305	1627	5.946289251	6.017540471	6.080202738	4.176945856	4.249798743	4.102978947	Cryab	ENSMUSG00000032060	12955	crystallin, alpha B
Arhgef4	-1.835070612	1.46E-10	2.85E-09	1147	1147	971	205	295	393	3.940077938	3.926602906	3.956401357	2.152548572	2.108217596	2.057104196	Arhgef4	ENSMUSG00000037509	226970	Rho guanine nucleotide exchange factor (GEF) 4
Tbc1d2	-1.83425046	1.91E-12	1.25E-10	4423	4108	3426	738	1089	1451	5.886248948	5.766202379	5.774437412	3.997214111	3.988966445	3.937956805	Tbc1d2	ENSMUSG00000039813	381605	TBC1 domain family, member 2
Ccdc151	-1.832581225	0.001293959	0.002094171	100	72	118	10	47	31	0.434190455	-0.04714741	0.92522454	-2.117846781	-0.516910324	-1.550718985	Ccdc151	ENSMUSG00000039632	77609	coiled-coil domain containing 151
2810029C07Rik	-1.832443047	1.78E-08	1.17E-07	951	1143	769	205	233	327	3.670004825	3.921567633	3.620260244	2.152548572	1.769096288	1.792858701	2810029C07Rik	ENSMUSG00000096995	100504687	RIKEN cDNA 2810029C07 gene
Scube3	-1.828751623	1.97E-09	2.06E-08	1193	1177	1068	241	304	386	3.996755129	3.963817498	4.093649948	2.385269411	2.151433301	2.031264996	Scube3	ENSMUSG00000038677	268935	signal peptide, CUB domain, EGF-like 3
Hpn	-1.828484471	0.000304637	0.000555236	165	122	84	25	46	26	1.15067157	0.704964432	0.439258596	-0.850278119	-0.547300154	-1.792980542	Hpn	ENSMUSG00000001249	15451	hepsin
Cul9	-1.828068732	5.53E-07	2.03E-06	263	251	207	46	71	77	1.819826164	1.739297635	1.73142297	0.012468547	0.068305663	-0.274433638	Cul9	ENSMUSG00000040327	78309	cullin 9
Eppk1	-1.827203021	2.31E-07	9.71E-07	1076	1055	659	151	315	297	3.847978685	3.806097983	3.39783314	1.71311993	2.202552781	1.654628036	Eppk1	NA	223650	epiplakin 1
Hebp2	-1.826660505	1.70E-08	1.13E-07	801	866	707	122	253	300	3.422663072	3.521613493	3.499132936	1.406936912	1.887428533	1.66906254	Hebp2	ENSMUSG00000019853	56016	heme binding protein 2
Baalc	-1.818630232	8.30E-06	2.16E-05	169	235	186	28	54	91	1.185010392	1.644688705	1.577791167	-0.690741717	-0.32041632	-0.037242395	Baalc	NA	118452	brain and acute leukemia, cytoplasmic
Bloc1s2	-1.818474384	1.34E-13	2.47E-11	8788	9102	7675	1554	2415	3170	6.876586542	6.913743258	6.93787181	5.070834155	5.137277137	5.064667165	Bloc1s2	ENSMUSG00000057506	73689	biogenesis of lysosomal organelles complex-1, subunit 2
Radil	-1.818375881	4.20E-07	1.60E-06	444	418	303	58	128	144	2.572955695	2.472659857	2.279154104	0.342679689	0.90983189	0.617130434	Radil	ENSMUSG00000029576	231858	Ras association and DIL domains
Zfhx4	-1.818264202	2.15E-09	2.18E-08	1877	1589	1190	292	433	542	4.650122053	4.396481872	4.249576862	2.661519643	2.66035466	2.519513879	Zfhx4	ENSMUSG00000025255	80892	zinc finger homeodomain 4
Alox12	-1.809623806	1.37E-07	6.26E-07	618	565	541	86	192	223	3.049033236	2.906447275	3.113607111	0.905694456	1.491155478	1.243366268	Alox12	ENSMUSG00000000320	11684	arachidonate 12-lipoxygenase
Pmm1	-1.805298806	9.66E-14	2.04E-11	17756	17977	15372	3043	4863	6607	7.891198329	7.895556172	7.939854374	6.040043724	6.146807511	6.123861221	Pmm1	ENSMUSG00000022474	29858	phosphomannomutase 1
Zfp703	-1.803276415	4.89E-09	4.24E-08	5173	4744	4110	795	1613	1572	6.112174684	5.973819747	6.036988371	4.10445618	4.555289756	4.053407622	Zfp703	ENSMUSG00000085795	353310	zinc finger protein 703
Hrct1	-1.802338631	1.46E-06	4.69E-06	362	285	291	49	110	109	2.279165336	1.921840048	2.221029484	0.102372519	0.692974626	0.219671831	Hrct1	ENSMUSG00000071001	100039781	histidine rich carboxyl terminus 1
S100a3	-1.801818135	8.32E-10	1.04E-08	794	865	718	148	218	304	3.410016678	3.519948663	3.521378809	1.684295197	1.673507947	1.688086603	S100a3	ENSMUSG00000001021	20197	S100 calcium binding protein A3
Arhgef9	-1.800735198	3.92E-07	1.51E-06	814	732	675	102	225	349	3.445859115	3.279416603	3.432396109	1.15013884	1.71890501	1.886422383	Arhgef9	ENSMUSG00000025656	236915	CDC42 guanine nucleotide exchange factor (GEF) 9
1810021B22Rik	-1.800248236	1.94E-05	4.56E-05	116	157	94	22	32	46	0.646222572	1.066043657	0.599921914	-1.029675411	-1.057824439	-1.001056717	1810021B22Rik	ENSMUSG00000087331	69120	RIKEN cDNA 1810021B22 gene
Slc25a42	-1.799647792	1.44E-10	2.83E-09	2113	2128	1663	358	603	696	4.820895047	4.817614514	4.732097122	2.954913846	3.13723183	2.87951763	Slc25a42	ENSMUSG00000002346	73095	solute carrier family 25, member 42
Ecm1	-1.799494191	7.31E-13	7.23E-11	13586	12664	10882	2408	3502	4477	7.505038959	7.390173139	7.441527647	5.702466875	5.673252356	5.56253794	Ecm1	ENSMUSG00000028108	13601	extracellular matrix protein 1
AU021063	-1.797584162	0.000329327	0.000595014	77	104	55	10	23	35	0.061642322	0.476840158	-0.163755079	-2.117846781	-1.517671049	-1.382507256	AU021063	NA	105968	expressed sequence AU021063
Cdk6	-1.795319458	1.07E-08	7.83E-08	521	548	463	103	132	195	2.8031705	2.862457054	2.889389364	1.164124409	0.953895578	1.051038557	Cdk6	ENSMUSG00000040274	12571	cyclin-dependent kinase 6
Tmem130	-1.793349324	0.000530456	0.00091783	152	121	121	34	50	25	1.033065777	0.693194184	0.96117725	-0.416480596	-0.429402747	-1.846727419	Tmem130	ENSMUSG00000043388	243339	transmembrane protein 130
Kazald1	-1.789883448	7.30E-07	2.58E-06	296	313	259	54	66	135	1.989713503	2.056557074	2.053505184	0.240782279	-0.035567979	0.524911116	Kazald1	ENSMUSG00000025213	107250	Kazal-type serine peptidase inhibitor domain 1
Grhl2	-1.789565097	0.000341844	0.000615174	85	77	52	16	14	28	0.202398193	0.048339103	-0.243351812	-1.473508754	-2.196656353	-1.691144701	Grhl2	ENSMUSG00000022286	252973	grainyhead-like 2 (Drosophila)
Nod1	-1.789484345	1.45E-08	9.97E-08	636	525	493	109	149	206	3.090383113	2.800721979	2.979796574	1.245304943	1.12746293	1.12968076	Nod1	ENSMUSG00000038058	107607	nucleotide-binding oligomerization domain containing 1
Tmem136	-1.789035874	4.77E-08	2.59E-07	456	453	412	87	134	148	2.611339244	2.588382797	2.721363693	0.92224751	0.975432805	0.656297796	Tmem136	ENSMUSG00000048503	235300	transmembrane protein 136
Nol4l	-1.788643087	1.22E-09	1.39E-08	1431	1428	1124	253	414	450	4.258971326	4.242468385	4.167320558	2.455187662	2.595767105	2.251876239	Nol4l	ENSMUSG00000061411	329540	nucleolar protein 4-like
Cby1	-1.78851384	1.54E-12	1.12E-10	7362	7750	6536	1363	2142	2634	6.621183189	6.681785621	6.706142159	4.881718619	4.964286608	4.797564221	Cby1	ENSMUSG00000022428	73739	chibby family member 1, beta catenin antagonist
Tbx2	-1.788505098	3.70E-10	5.78E-09	2370	1958	1937	371	594	839	4.986410744	4.697560196	4.952023872	3.006280869	3.115572035	3.148626613	Tbx2	ENSMUSG00000000093	21385	T-box 2
Fcgbp	-1.784719348	7.87E-09	6.15E-08	1358	1104	1019	201	375	419	4.183488647	3.871530155	4.025950047	2.124211849	2.453379311	2.149219645	Fcgbp	ENSMUSG00000047730	215384	Fc fragment of IgG binding protein
Tlr2	-1.783552049	9.28E-14	2.04E-11	7918	8167	6844	1436	2155	2980	6.726206894	6.75738535	6.772565106	4.956953482	4.973012039	4.97553568	Tlr2	ENSMUSG00000027995	24088	toll-like receptor 2
Has2	-1.78245782	1.55E-13	2.63E-11	16067	16237	14050	3054	4190	5985	7.747001363	7.748698207	7.810127472	6.045248331	5.9319576	5.981247651	Has2	ENSMUSG00000022367	15117	hyaluronan synthase 2
Baiap2	-1.779520773	5.09E-10	7.23E-09	6084	6090	5043	1296	1497	2023	6.346149303	6.334085926	6.332074483	4.809034696	4.447685051	4.417027645	Baiap2	ENSMUSG00000025372	108100	brain-specific angiogenesis inhibitor 1-associated protein 2
Sox4	-1.776155082	1.39E-12	1.07E-10	20789	19687	18409	3930	5345	7594	8.118699489	8.026639699	8.199946989	6.409008438	6.283124797	6.324687697	Sox4	ENSMUSG00000076431	20677	SRY (sex determining region Y)-box 4
Cap2	-1.773109623	1.36E-08	9.46E-08	568	569	467	104	135	226	2.927535184	2.916605853	2.901776041	1.177975703	0.986082037	1.26253047	Cap2	ENSMUSG00000021373	67252	CAP, adenylate cyclase-associated protein, 2 (yeast)
4933430I17Rik	-1.772634441	0.00010638	0.000212106	99	122	73	23	21	36	0.419844019	0.704964432	0.23904046	-0.967364529	-1.643340287	-1.343349597	4933430I17Rik	ENSMUSG00000058046	214106	RIKEN cDNA 4933430I17 gene
F11r	-1.772620119	1.40E-12	1.07E-10	6335	6613	5615	1137	1858	2373	6.404463793	6.452928518	6.487052378	4.620303418	4.759178927	4.647101988	F11r	ENSMUSG00000038235	16456	F11 receptor
Ccdc40	-1.770970108	0.000514715	0.00089292	93	99	65	26	16	28	0.330633775	0.40650027	0.073718376	-0.795115714	-2.015797488	-1.691144701	Ccdc40	ENSMUSG00000039963	207607	coiled-coil domain containing 40
Tmtc1	-1.769120151	4.48E-08	2.46E-07	470	439	403	94	114	164	2.654866317	2.543201304	2.68956856	1.033087675	0.744060246	0.803127809	Tmtc1	ENSMUSG00000030306	387314	transmembrane and tetratricopeptide repeat containing 1
Adgrg6	-1.76222025	4.78E-12	2.27E-10	3929	3827	3068	656	1056	1449	5.715429418	5.664007735	5.615254413	3.827449448	3.944612642	3.935968725	Adgrg6	ENSMUSG00000039116	215798	adhesion G protein-coupled receptor G6
Epor	-1.760198867	4.40E-05	9.56E-05	199	206	134	35	70	47	1.419396697	1.45559427	1.107382073	-0.375441787	0.048120641	-0.970902418	Epor	ENSMUSG00000006235	13857	erythropoietin receptor
Spn	-1.759821094	3.61E-07	1.41E-06	591	488	461	78	177	208	2.984697597	2.695508588	2.883155916	0.765952951	1.374415938	1.14352993	Spn	ENSMUSG00000051457	20737	sialophorin
Sdsl	-1.757466367	2.09E-05	4.89E-05	166	152	154	37	49	45	1.159333203	1.019672231	1.306844124	-0.296708567	-0.457986214	-1.031854761	Sdsl	ENSMUSG00000029596	257635	serine dehydratase-like
Lynx1	-1.757427582	1.06E-13	2.10E-11	22319	22590	20074	4245	6133	8558	8.221146463	8.225070591	8.324858072	6.520225791	6.481494002	6.497072588	Lynx1	ENSMUSG00000022594	23936	Ly6/neurotoxin 1
Hsf5	-1.757338989	1.59E-05	3.83E-05	154	143	99	23	42	47	1.051794794	0.932251811	0.674006911	-0.967364529	-0.675696506	-0.970902418	Hsf5	ENSMUSG00000070345	327992	heat shock transcription factor family member 5
Gm17762	-1.756229443	3.02E-06	8.89E-06	209	184	151	30	57	72	1.48976472	1.293548439	1.278626818	-0.59341205	-0.243760711	-0.369575593	Gm17762	NA	100034739	predicted gene, 17762
Slc5a1	-1.755413639	2.73E-06	8.10E-06	377	333	304	50	130	127	2.337572239	2.145620808	2.283893752	0.131137182	0.932031955	0.437676745	Slc5a1	ENSMUSG00000011034	20537	solute carrier family 5 (sodium/glucose cotransporter), member 1
Arhgap27	-1.751827718	6.26E-08	3.24E-07	738	551	481	113	178	214	3.304644713	2.870318144	2.944310603	1.296993676	1.38249943	1.184297199	Arhgap27	ENSMUSG00000034255	544817	Rho GTPase activating protein 27
Tmem63b	-1.751401741	5.44E-13	5.70E-11	12711	12678	10495	2460	3401	4505	7.409003497	7.391767017	7.389290426	5.733281483	5.6310442	5.571530034	Tmem63b	ENSMUSG00000036026	224807	transmembrane protein 63b
Adamtsl4	-1.751118462	7.72E-09	6.07E-08	2878	2721	2322	530	896	852	5.266476209	5.172095	5.213458157	3.520088996	3.707810998	3.170773987	Thsd4	ENSMUSG00000032289	207596	thrombospondin, type I, domain containing 4
Tns1	-1.749974719	5.07E-09	4.36E-08	2906	2665	2409	489	929	916	5.280439192	5.142105515	5.266504639	3.404080805	3.759935172	3.275109211	Tns1	ENSMUSG00000055322	21961	tensin 1
Cadm4	-1.748175088	1.51E-07	6.83E-07	736	864	637	124	273	266	3.300735297	3.518281909	3.348915168	1.430271282	1.996786416	1.496349413	Cadm4	ENSMUSG00000054793	260299	cell adhesion molecule 4
Pik3r5	-1.74763747	1.59E-07	7.11E-07	559	512	497	106	176	169	2.904535887	2.76462301	2.99143388	1.205285605	1.366286899	0.846107862	Pik3r5	ENSMUSG00000020901	320207	phosphoinositide-3-kinase, regulatory subunit 5, p101
Vax2os	-1.746235793	0.001780606	0.00281243	77	81	39	15	23	14	0.061642322	0.120423971	-0.650328974	-1.56283076	-1.517671049	-2.62646825	Vax2os	ENSMUSG00000085794	574519	ventral anterior homeobox 2, opposite strand
Abhd4	-1.745957084	9.78E-14	2.04E-11	20252	19918	17577	3646	5587	7847	8.08094547	8.043468296	8.133227883	6.300812464	6.346997275	6.371960658	Abhd4	ENSMUSG00000040997	105501	abhydrolase domain containing 4
Gpr162	-1.745926822	1.54E-05	3.73E-05	153	170	206	38	43	71	1.042460678	1.180065454	1.724466486	-0.258896737	-0.642510346	-0.389380765	Gpr162	ENSMUSG00000038390	14788	G protein-coupled receptor 162
Pvrl4	-1.74499305	1.53E-11	5.29E-10	2406	2431	1900	448	649	861	5.008150658	5.009575713	4.924212224	3.277922156	3.243127274	3.185910016	Nectin4	ENSMUSG00000006411	71740	nectin cell adhesion molecule 4
Ahr	-1.743208531	1.34E-11	4.77E-10	3466	3638	3123	710	932	1347	5.534590984	5.590960366	5.64088114	3.941462907	3.764581663	3.830762327	Ahr	ENSMUSG00000019256	11622	aryl-hydrocarbon receptor
Tuft1	-1.743038456	5.40E-13	5.70E-11	5110	5159	4253	970	1374	1906	6.094500435	6.094780964	6.086320342	4.391271201	4.324076867	4.331138306	Tuft1	ENSMUSG00000005968	22156	tuftelin 1
Gm166	-1.742268613	4.30E-08	2.38E-07	807	792	695	183	207	264	3.4334153	3.392913547	3.47446698	1.989322092	1.599151794	1.485516102	Ccdc189	ENSMUSG00000057176	233899	coiled-coil domain containing 189
Adcy1	-1.740512638	0.000560448	0.000966292	87	54	93	14	18	36	0.23554142	-0.455146997	0.584637196	-1.658050119	-1.855106578	-1.343349597	Adcy1	ENSMUSG00000020431	432530	adenylate cyclase 1
Ddit4	-1.736696707	4.88E-14	1.50E-11	31804	32641	27728	5867	9159	12313	8.732061827	8.756050497	8.790855876	6.987022528	7.060015399	7.021840151	Ddit4	ENSMUSG00000020108	74747	DNA-damage-inducible transcript 4
Apobec1	-1.730415487	3.33E-12	1.78E-10	4191	3952	3390	783	1119	1490	5.808537399	5.710364002	5.759201508	4.082531878	4.028137939	3.976186632	Apobec1	ENSMUSG00000040613	11810	apolipoprotein B mRNA editing enzyme, catalytic polypeptide 1
Plin4	-1.724901324	9.63E-07	3.29E-06	429	419	349	104	99	141	2.523494034	2.476098351	2.482506989	1.177975703	0.542378784	0.587040915	Plin4	ENSMUSG00000002831	57435	perilipin 4
Ttll1	-1.722843064	6.45E-10	8.66E-09	2258	2320	1786	446	665	744	4.916601223	4.94218105	4.83498795	3.271476605	3.278211082	2.975553346	Ttll1	ENSMUSG00000022442	319953	tubulin tyrosine ligase-like 1
Adgrf5	-1.722713622	0.000383433	0.000682167	165	212	157	19	86	76	1.15067157	1.496802799	1.334520106	-1.234591254	0.341411556	-0.292966692	Adgrf5	ENSMUSG00000056492	224792	adhesion G protein-coupled receptor F5
Gareml	-1.722040905	1.99E-05	4.68E-05	275	320	143	52	58	96	1.883941764	2.088358598	1.200565706	0.187001111	-0.21908799	0.038830232	Garem2	ENSMUSG00000044576	242915	GRB2 associated regulator of MAPK1 subtype 2
Angel1	-1.720937191	2.15E-08	1.36E-07	613	571	480	117	171	197	3.03733366	2.921658443	2.941313659	1.346894387	1.324940111	1.06565969	Angel1	ENSMUSG00000021257	68737	angel homolog 1
Glt8d2	-1.719850078	1.60E-10	3.03E-09	1370	1315	1141	249	391	500	4.196171186	4.1236282	4.188960327	2.432256026	2.513504264	2.403449188	Glt8d2	ENSMUSG00000020251	74782	glycosyltransferase 8 domain containing 2
Ccng1	-1.716498733	2.30E-13	3.24E-11	171533	175175	143592	32023	46759	69089	11.16322861	11.18005168	11.16337846	9.435304197	9.411874028	9.509984326	Ccng1	ENSMUSG00000020326	12450	cyclin G1
Mkx	-1.715307575	5.81E-10	7.97E-09	2907	2999	2404	564	706	1262	5.280935379	5.312386897	5.263508248	3.609684153	3.364402296	3.736821348	Mkx	ENSMUSG00000061013	210719	mohawk homeobox
Dpep2	-1.715247314	0.000717098	0.00120987	56	88	74	20	18	22	-0.390447513	0.238505826	0.258434694	-1.163002877	-1.855106578	-2.021139478	Dpep2	ENSMUSG00000053687	319446	dipeptidase 2
Ppp1r9a	-1.714552716	0.000267787	0.000492179	154	141	66	29	26	43	1.051794794	0.912084086	0.095449737	-0.641256261	-1.347576962	-1.095496309	Ppp1r9a	ENSMUSG00000032827	243725	protein phosphatase 1, regulatory (inhibitor) subunit 9A
Rasl11b	-1.712050859	4.83E-08	2.62E-07	633	649	438	122	172	205	3.083573246	3.106061221	2.809465831	1.406936912	1.33330481	1.122705999	Rasl11b	ENSMUSG00000049907	68939	RAS-like, family 11, member B
Ift27	-1.711773412	6.09E-12	2.75E-10	5841	5758	4960	1033	1760	2219	6.28735501	6.253226127	6.308136633	4.481995267	4.681045974	4.550356292	Ift27	ENSMUSG00000016637	67042	intraflagellar transport 27
Asap3	-1.710347993	1.25E-11	4.53E-10	4926	4864	3934	988	1322	1750	6.041604969	6.009850925	5.973860891	4.417779711	4.268457267	4.208035828	Asap3	ENSMUSG00000036995	230837	ArfGAP with SH3 domain, ankyrin repeat and PH domain 3
L1cam	-1.707763214	5.48E-06	1.50E-05	213	219	160	37	72	66	1.516978224	1.543437377	1.361675143	-0.296708567	0.088212164	-0.492702495	L1cam	ENSMUSG00000031391	16728	L1 cell adhesion molecule
Egln3	-1.707718734	6.01E-09	5.00E-08	1044	1008	812	179	326	355	3.804465922	3.740418905	3.698668157	1.957553317	2.251922743	1.910920723	Egln3	ENSMUSG00000035105	112407	egl-9 family hypoxia-inducible factor 3
A530072M11Rik	-1.706598823	0.001800201	0.0028409	94	60	78	9	20	54	0.345890516	-0.30595495	0.333505065	-2.260004274	-1.71053355	-0.775818015	A530072M11Rik	ENSMUSG00000085112	100415915	RIKEN cDNA gene A530072M11
Fosb	-1.705725587	2.48E-06	7.46E-06	1743	1749	1642	513	418	570	4.543328692	4.534804055	4.713772938	3.473114632	2.609606852	2.59200744	Fosb	ENSMUSG00000003545	14282	FBJ osteosarcoma oncogene B
Adgre5	-1.704798588	8.82E-13	8.02E-11	9195	9299	7480	1824	2555	3369	6.94189353	6.944631652	6.900747685	5.301863159	5.218545345	5.152468598	Adgre5	ENSMUSG00000002885	26364	adhesion G protein-coupled receptor E5
Tmem140	-1.704687813	2.56E-09	2.52E-08	1435	1532	1303	247	433	655	4.262995409	4.343815233	4.380358976	2.420652057	2.66035466	2.792099463	Tmem140	ENSMUSG00000057137	68487	transmembrane protein 140
Prss53	-1.702393155	8.25E-06	2.15E-05	258	231	218	64	64	76	1.792246876	1.620034239	1.805809019	0.483183478	-0.079306119	-0.292966692	Prss53	ENSMUSG00000044139	330657	protease, serine 53
Acsl6	-1.69817334	0.000330125	0.000596032	153	145	101	15	45	78	1.042460678	0.952141489	0.702607511	-1.56283076	-0.578343935	-0.256135646	Acsl6	ENSMUSG00000020333	216739	acyl-CoA synthetase long-chain family member 6
Lrrn4cl	-1.697218417	2.04E-06	6.28E-06	228	248	206	37	74	103	1.614687637	1.72202461	1.724466486	-0.296708567	0.127219629	0.139012421	Lrrn4cl	ENSMUSG00000071656	68852	LRRN4 C-terminal like
Nmb	-1.696616381	6.14E-07	2.22E-06	331	364	349	74	117	119	2.150402049	2.273642756	2.482506989	0.690655108	0.781221313	0.34482623	Nmb	ENSMUSG00000025723	68039	neuromedin B
Psd	-1.695151798	1.39E-05	3.41E-05	366	318	283	43	126	149	2.294973164	2.079343754	2.180936584	-0.083412475	0.887284867	0.665925715	Psd	ENSMUSG00000037126	73728	pleckstrin and Sec7 domain containing
Flnc	-1.69484641	2.79E-12	1.61E-10	101392	94041	74568	18695	26818	35567	10.40469246	10.28262418	10.21803991	8.658869292	8.609853963	8.552094067	Flnc	ENSMUSG00000068699	68794	filamin C, gamma
Gm16793	-1.692221327	8.58E-05	0.000174757	124	89	89	20	34	34	0.741593201	0.254612531	0.521825601	-1.163002877	-0.972872316	-1.422757456	Gm16793	ENSMUSG00000097357	100504714	predicted gene, 16793
Mtmr11	-1.691460197	3.65E-12	1.89E-10	4361	4405	3883	856	1312	1675	5.86588762	5.86688284	5.955039922	4.211027249	4.257510912	4.14489163	Mtmr11	ENSMUSG00000045934	194126	myotubularin related protein 11
Reep1	-1.688554364	4.74E-12	2.26E-10	3274	3191	2658	593	932	1274	5.452399567	5.401882964	5.408361495	3.681939029	3.764581663	3.750460243	Reep1	ENSMUSG00000052852	52250	receptor accessory protein 1
Hyal1	-1.682875208	2.52E-12	1.50E-10	4503	4281	3620	849	1201	1757	5.912104031	5.825698823	5.853881902	4.199190126	4.130078325	4.213790682	Hyal1	ENSMUSG00000010051	15586	hyaluronoglucosaminidase 1
Phlda1	-1.682540164	5.61E-10	7.76E-09	7665	6997	5596	1431	2226	2422	6.679363005	6.534347275	6.482163093	4.95192371	5.019756958	4.676572212	Phlda1	ENSMUSG00000020205	21664	pleckstrin homology like domain, family A, member 1
Zfp423	-1.681102904	0.000163419	0.000313073	179	215	154	57	56	46	1.267443312	1.516973908	1.306844124	0.317872081	-0.268862733	-1.001056717	Zfp423	ENSMUSG00000045333	94187	zinc finger protein 423
Mdm2	-1.677351112	1.84E-13	2.85E-11	148640	156683	122785	28972	43552	58946	10.95656624	11.01910448	10.93753893	9.290858123	9.309371138	9.280927047	Mdm2	ENSMUSG00000020184	17246	transformed mouse 3T3 cell double minute 2
Camk2b	-1.675363583	2.16E-07	9.18E-07	474	439	427	81	126	224	2.667065171	2.543201304	2.772846307	0.819954503	0.887284867	1.249782663	Camk2b	ENSMUSG00000057897	12323	calcium/calmodulin-dependent protein kinase II, beta
Trpv2	-1.67507374	0.000486012	0.000846712	145	138	109	15	64	56	0.96553053	0.881293822	0.811656232	-1.56283076	-0.079306119	-0.724603757	Trpv2	ENSMUSG00000018507	22368	transient receptor potential cation channel, subfamily V, member 2
Podxl	-1.674036136	3.06E-05	6.88E-05	299	242	251	35	98	135	2.004210059	1.686845481	2.008397725	-0.375441787	0.527875527	0.524911116	Podxl	ENSMUSG00000025608	27205	podocalyxin-like
4632428N05Rik	-1.673989039	3.83E-06	1.09E-05	226	224	167	45	69	69	1.602035779	1.575848363	1.423117177	-0.018789082	0.027649194	-0.429825908	Vsir	ENSMUSG00000020101	74048	V-set immunoregulatory receptor
Colec12	-1.673098778	1.02E-12	8.82E-11	4949	4838	4068	929	1382	1988	6.048323938	6.002120174	6.022172877	4.329008132	4.332446558	4.391865964	Colec12	ENSMUSG00000036103	140792	collectin sub-family member 12
Slc8b1	-1.671550651	1.33E-09	1.50E-08	1132	1202	1054	237	313	506	3.921104189	3.994112769	4.074629105	2.361189499	2.193392046	2.420612566	Slc8b1	ENSMUSG00000032754	170756	solute carrier family 8 (sodium/lithium/calcium exchanger), member B1
Sulf2	-1.669347721	1.28E-12	1.02E-10	7336	6991	5936	1430	2081	2703	6.616079815	6.533109808	6.567245098	4.950915647	4.922624328	4.834851584	Sulf2	ENSMUSG00000006800	72043	sulfatase 2
Fam131b	-1.66755485	4.22E-09	3.77E-08	1483	1453	1227	335	384	543	4.310428736	4.267488488	4.293718063	2.859296726	2.487507363	2.522166646	Fam131b	ENSMUSG00000029861	76156	family with sequence similarity 131, member B
Slc3a1	-1.665944362	4.92E-05	0.000105527	102	130	89	20	36	41	0.462462302	0.795821374	0.521825601	-1.163002877	-0.892645578	-1.162075355	Slc3a1	ENSMUSG00000024131	20532	solute carrier family 3, member 1
Pde4b	-1.664628718	3.08E-12	1.72E-10	4471	4391	3917	887	1331	1737	5.901817534	5.862291474	5.967614477	4.2623119	4.278238474	4.197286956	Pde4b	ENSMUSG00000028525	18578	phosphodiesterase 4B, cAMP specific
Dusp1	-1.664572812	4.00E-12	2.00E-10	12167	13271	11859	2575	3804	5219	7.34590484	7.457711478	7.565556566	5.799178402	5.792558649	5.783717397	Dusp1	ENSMUSG00000024190	19252	dual specificity phosphatase 1
1110019D14Rik	-1.663459499	5.91E-07	2.15E-06	496	449	410	84	118	243	2.732375169	2.575617535	2.714358417	0.872007441	0.793398625	1.366566556	1110019D14Rik	ENSMUSG00000097616	76311	RIKEN cDNA 1110019D14 gene
Ankrd13d	-1.663423953	1.36E-11	4.84E-10	2539	2513	2062	492	743	961	5.085741066	5.057415741	5.042204131	3.412892856	3.437997269	3.344198954	Ankrd13d	ENSMUSG00000005986	68423	ankyrin repeat domain 13 family, member D
1700001O22Rik	-1.662468726	0.000212606	0.000397918	86	90	67	21	21	29	0.21906498	0.270541399	0.11685861	-1.094799501	-1.643340287	-1.642801402	1700001O22Rik	ENSMUSG00000044320	73598	RIKEN cDNA 1700001O22 gene
S100a10	-1.662466474	3.02E-12	1.70E-10	37134	40451	33682	7132	11548	16478	8.955587414	9.06553146	9.071481947	7.268677597	7.394364657	7.442159145	S100a10	ENSMUSG00000041959	20194	S100 calcium binding protein A10 (calpactin)
Kcnn4	-1.660506703	7.18E-10	9.31E-09	1359	1424	1187	284	365	594	4.184549794	4.238424592	4.245937945	2.621533403	2.414487646	2.651371173	Kcnn4	ENSMUSG00000054342	16534	potassium intermediate/small conductance calcium-activated channel, subfamily N, member 4
Mbp	-1.660443655	0.000270978	0.000497611	103	139	114	15	46	60	0.476393142	0.89163043	0.875849955	-1.56283076	-0.547300154	-0.627326521	Mbp	ENSMUSG00000041607	17196	myelin basic protein
Adm2	-1.659620759	4.02E-05	8.81E-05	162	133	123	33	48	43	1.124370213	0.828469816	0.984657422	-0.458721058	-0.48714746	-1.095496309	Adm2	ENSMUSG00000054136	223780	adrenomedullin 2
Stbd1	-1.654902206	7.16E-10	9.31E-09	998	1070	874	212	290	411	3.739523507	3.82644525	3.804709786	2.20083679	2.083637455	2.12149768	Stbd1	ENSMUSG00000047963	52331	starch binding domain 1
Cmtm3	-1.654438504	6.89E-12	2.96E-10	2824	2764	2260	540	798	1114	5.239159882	5.19470682	5.174428103	3.547022977	3.540893527	3.557062789	Cmtm3	ENSMUSG00000031875	68119	CKLF-like MARVEL transmembrane domain containing 3
Syngap1	-1.654425368	4.20E-08	2.34E-07	1475	1448	1104	314	450	453	4.302630692	4.26251906	4.141439348	2.766088971	2.71579022	2.261433806	Syngap1	ENSMUSG00000067629	240057	synaptic Ras GTPase activating protein 1 homolog (rat)
Il12rb1	-1.652855723	1.54E-05	3.73E-05	155	241	169	37	49	92	1.061068907	1.680897981	1.440201917	-0.296708567	-0.457986214	-0.021703581	Il12rb1	ENSMUSG00000000791	16161	interleukin 12 receptor, beta 1
Fbxo36	-1.65265571	4.23E-05	9.22E-05	105	145	92	22	35	47	0.50385765	0.952141489	0.569188807	-1.029675411	-0.932201353	-0.970902418	Fbxo36	ENSMUSG00000073633	66153	F-box protein 36
Rasgef1a	-1.648265071	2.47E-08	1.52E-07	779	793	606	164	190	329	3.382538107	3.394731524	3.277042434	1.831771853	1.476125289	1.80161971	Rasgef1a	ENSMUSG00000030134	70727	RasGEF domain family, member 1A
Ccl7	-1.645447614	3.62E-08	2.06E-07	1255	1331	1245	243	483	490	4.069785056	4.141061845	4.314713455	2.397160306	2.81767535	2.374381858	Ccl7	ENSMUSG00000035373	20306	chemokine (C-C motif) ligand 7
Ntn4	-1.642361973	2.04E-10	3.65E-09	2456	2223	1931	494	685	869	5.037811617	4.880593268	4.947550138	3.418737795	3.320899078	3.199232232	Ntn4	ENSMUSG00000020019	57764	netrin 4
Prtg	-1.640813235	3.52E-07	1.38E-06	368	347	298	79	89	149	2.302812596	2.2048475	2.255219449	0.784178986	0.390335139	0.665925715	Prtg	ENSMUSG00000036030	235472	protogenin
4931431C16Rik	-1.640311528	0.000138049	0.000268779	118	96	102	16	34	56	0.670662765	0.362589032	0.716697962	-1.473508754	-0.972872316	-0.724603757	4931431C16Rik	ENSMUSG00000055061	74364	RIKEN cDNA 4931431C16 gene
2310008N11Rik	-1.638993776	6.76E-05	0.000140687	152	113	115	20	40	66	1.033065777	0.595406587	0.888352921	-1.163002877	-0.744450671	-0.492702495	2310008N11Rik	ENSMUSG00000100335	72316	RIKEN cDNA 2310008N11 gene
B4galnt3	-1.638625272	7.13E-05	0.000147562	122	118	91	18	42	46	0.718335059	0.657296067	0.553573205	-1.309918261	-0.675696506	-1.001056717	B4galnt3	ENSMUSG00000041372	330406	beta-1,4-N-acetyl-galactosaminyl transferase 3
Cdkn2b	-1.636761032	3.35E-11	9.42E-10	5146	5329	4755	1147	1468	2189	6.104626503	6.14154479	6.247252999	4.632929293	4.419481342	4.530730561	Cdkn2b	ENSMUSG00000073802	12579	cyclin-dependent kinase inhibitor 2B (p15, inhibits CDK4)
Dcaf4	-1.635768913	8.31E-12	3.40E-10	4823	4590	4137	936	1485	1866	6.011125792	5.926220826	6.046432898	4.339830443	4.436081346	4.300560989	Dcaf4	ENSMUSG00000021222	73828	DDB1 and CUL4 associated factor 4
Slc9a3r1	-1.632740278	3.29E-12	1.78E-10	5283	5087	4551	1088	1505	2129	6.142524736	6.074508854	6.184003332	4.55678723	4.455369327	4.490659532	Slc9a3r1	ENSMUSG00000020733	26941	solute carrier family 9 (sodium/hydrogen exchanger), member 3 regulator 1
Acot1	-1.627803405	4.42E-06	1.24E-05	226	182	157	37	64	76	1.602035779	1.277872952	1.334520106	-0.296708567	-0.079306119	-0.292966692	Acot1	ENSMUSG00000072949	26897	acyl-CoA thioesterase 1
Dnajb5	-1.62704568	5.80E-11	1.43E-09	1802	1822	1547	349	551	760	4.59132637	4.593761317	4.627839944	2.918249422	3.007345857	3.006195313	Dnajb5	ENSMUSG00000036052	56323	DnaJ heat shock protein family (Hsp40) member B5
Tbc1d8	-1.626735177	1.03E-10	2.19E-09	4639	4136	3516	933	1276	1635	5.955021426	5.775999835	5.811837752	4.335202247	4.217401737	4.110049499	Tbc1d8	ENSMUSG00000003134	54610	TBC1 domain family, member 8
Sord	-1.620487378	1.44E-12	1.08E-10	4996	5242	4373	1055	1540	2061	6.061957461	6.117802126	6.126454562	4.512378897	4.488514969	4.44385815	Sord	ENSMUSG00000027227	20322	sorbitol dehydrogenase
Hmha1	-1.619933384	4.47E-09	3.96E-08	774	804	751	160	252	337	3.373261033	3.414579512	3.586129479	1.7962918	1.881736854	1.836141219	Arhgap45	ENSMUSG00000035697	70719	Rho GTPase activating protein 45
Car13	-1.61978663	1.75E-11	5.83E-10	2922	3065	2617	639	889	1207	5.288357781	5.343781347	5.385941871	3.789607952	3.696508029	3.672605128	Car13	ENSMUSG00000027555	71934	carbonic anhydrase 13
Zfp57	-1.615480634	8.40E-10	1.05E-08	2240	2155	1691	475	572	886	4.905059919	4.835795131	4.75617285	3.362230886	3.061215151	3.22713996	Zfp57	ENSMUSG00000036036	22715	zinc finger protein 57
Gm11944	-1.612977864	0.000162195	0.000311011	112	77	83	21	27	35	0.59606388	0.048339103	0.422162616	-1.094799501	-1.295061236	-1.382507256	Gm11944	ENSMUSG00000084941	100302648	predicted gene 11944
Acy3	-1.612934598	1.36E-09	1.52E-08	2166	2199	2198	490	640	990	4.856617788	4.864940513	5.134312717	3.40702414	3.223011124	3.38703196	Acy3	ENSMUSG00000024866	71670	aspartoacylase (aminoacylase) 3
Igsf9	-1.611903458	2.07E-06	6.37E-06	209	221	177	46	65	79	1.48976472	1.556489276	1.506586794	0.012468547	-0.057271304	-0.238066827	Igsf9	ENSMUSG00000037995	93842	immunoglobulin superfamily, member 9
Nkapl	-1.609955477	0.000102647	0.000205538	107	112	108	19	31	62	0.53080907	0.582703596	0.798467468	-1.234591254	-1.102253137	-0.581041906	Nkapl	ENSMUSG00000059395	66707	NFKB activating protein-like
Oacyl	-1.606844926	1.69E-06	5.32E-06	262	310	227	57	71	134	1.814352322	2.042710286	1.863940864	0.317872081	0.068305663	0.514290951	Oacyl	ENSMUSG00000046610	319888	O-acyltransferase like
1700007K13Rik	-1.606628028	6.50E-11	1.54E-09	2717	2851	2506	549	914	1163	5.183455718	5.239400175	5.32343606	3.570840988	3.736475556	3.619091324	1700007K13Rik	ENSMUSG00000026831	69327	RIKEN cDNA 1700007K13 gene
Mmp28	-1.605624886	6.80E-09	5.49E-08	2421	2125	1800	533	619	845	5.017113151	4.81558023	4.846247194	3.528222119	3.174953055	3.158890742	Mmp28	ENSMUSG00000020682	118453	matrix metallopeptidase 28 (epilysin)
Ptger4	-1.603886729	4.36E-07	1.65E-06	339	368	315	70	96	174	2.184747211	2.289364023	2.335027359	0.611209824	0.498424149	0.887844432	Ptger4	ENSMUSG00000039942	19219	prostaglandin E receptor 4 (subtype EP4)
Nradd	-1.603637908	3.83E-12	1.94E-10	16130	15452	14391	3187	4811	7090	7.752646852	7.677211528	7.844722025	6.106734343	6.131300844	6.225631493	Nradd	ENSMUSG00000032491	67169	neurotrophin receptor associated death domain
Slc38a1	-1.60339762	7.32E-12	3.10E-10	8681	8531	6545	1745	2574	3271	6.858915063	6.820285907	6.708127098	5.238007975	5.229230047	5.109897184	Slc38a1	ENSMUSG00000023169	105727	solute carrier family 38, member 1
Itgb6	-1.603253564	2.34E-05	5.42E-05	148	156	126	24	51	69	0.994862153	1.056887844	1.019176345	-0.907633835	-0.401374606	-0.429825908	Itgb6	ENSMUSG00000026971	16420	integrin beta 6
Chrna2	-1.602352138	0.000200866	0.000377675	80	93	64	15	27	33	0.116047639	0.3172992	0.051654662	-1.56283076	-1.295061236	-1.464162917	Chrna2	ENSMUSG00000022041	110902	cholinergic receptor, nicotinic, alpha polypeptide 2 (neuronal)
Wdr91	-1.596663967	2.46E-12	1.48E-10	8203	7732	6912	1719	2382	3291	6.777215733	6.678431412	6.78682672	5.216358694	5.117435424	5.118687846	Wdr91	ENSMUSG00000058486	101240	WD repeat domain 91
Cav2	-1.596028574	1.41E-12	1.08E-10	13426	13911	10835	2674	4295	5425	7.487949091	7.525655165	7.435283578	5.853591815	5.967657284	5.839553013	Cav2	ENSMUSG00000000058	12390	caveolin 2
Atp2b4	-1.594830285	3.50E-10	5.52E-09	1589	1690	1513	334	540	693	4.409960388	4.485327864	4.595797354	2.854992185	2.97830484	2.873297727	Atp2b4	ENSMUSG00000026463	381290	ATPase, Ca++ transporting, plasma membrane 4
BC021767	-1.593372813	0.001765868	0.002791239	102	73	85	10	42	43	0.462462302	-0.027537818	0.45615436	-2.117846781	-0.675696506	-1.095496309	BC021767	NA	545551	cingulin pseudogene
Sh3bp1	-1.593208898	7.05E-11	1.62E-09	7163	6538	5563	1522	2017	2627	6.581655162	6.436475676	6.473631596	5.040828824	4.877579878	4.793727038	Sh3bp1	ENSMUSG00000022436	20401	SH3-domain binding protein 1
Sspo	-1.592663328	2.23E-05	5.19E-05	140	174	138	26	52	74	0.915279053	1.213410169	1.149541726	-0.795115714	-0.373880624	-0.330762699	Sspo	ENSMUSG00000029797	243369	SCO-spondin
Flt1	-1.590879415	1.36E-07	6.25E-07	547	575	541	115	209	218	2.873288452	2.931710847	3.113607111	1.32215977	1.612959264	1.210849131	Flt1	ENSMUSG00000029648	14254	FMS-like tyrosine kinase 1
Ppp1r12b	-1.589999104	1.08E-09	1.28E-08	1752	1595	1386	308	548	713	4.550754385	4.401915513	4.469390246	2.738313423	2.999483378	2.91426603	Ppp1r12b	ENSMUSG00000073557	329251	protein phosphatase 1, regulatory (inhibitor) subunit 12B
Arsj	-1.589702941	8.07E-12	3.33E-10	3383	3431	2725	692	984	1447	5.499633349	5.506469589	5.444264761	3.904450601	3.842830372	3.933977902	Arsj	ENSMUSG00000046561	271970	arylsulfatase J
Map7	-1.589422516	2.34E-05	5.42E-05	197	151	120	28	51	75	1.404901646	1.010216367	0.949292287	-0.690741717	-0.401374606	-0.311740925	Map7	ENSMUSG00000019996	17761	microtubule-associated protein 7
Efnb3	-1.588190829	1.10E-06	3.68E-06	755	633	401	130	203	225	3.33745386	3.070108376	2.682406795	1.498091921	1.571133977	1.256170646	Efnb3	ENSMUSG00000003934	13643	ephrin B3
Fam129a	-1.587009233	1.09E-08	7.95E-08	890	874	811	211	261	357	3.57447512	3.534863421	3.696892289	2.194036641	1.932171235	1.918995255	Fam129a	ENSMUSG00000026483	63913	family with sequence similarity 129, member A
Egfr	-1.58651196	1.12E-11	4.18E-10	7743	7276	5898	1596	2111	3096	6.693967842	6.590747852	6.55798122	5.109292264	4.943264343	5.030604426	Egfr	ENSMUSG00000020122	13649	epidermal growth factor receptor
Tmie	-1.586434489	1.42E-05	3.48E-05	194	210	150	33	75	75	1.382882292	1.483196989	1.269097058	-0.458721058	0.146334855	-0.311740925	Tmie	ENSMUSG00000049555	20776	transmembrane inner ear
Glul	-1.585067537	7.42E-13	7.23E-11	5728	5722	4871	1203	1745	2394	6.259176292	6.244179525	6.282019219	4.701662111	4.668704446	4.659805868	Glul	ENSMUSG00000026473	14645	glutamate-ammonia ligase (glutamine synthetase)
Cd80	-1.584136332	4.24E-09	3.78E-08	1181	1350	974	247	414	477	3.982183089	4.161494341	3.960847769	2.420652057	2.595767105	2.335697042	Cd80	ENSMUSG00000075122	12519	CD80 antigen
Sema6a	-1.578202372	6.83E-06	1.82E-05	226	177	208	47	67	82	1.602035779	1.237922486	1.738346071	0.043063281	-0.014186317	-0.185179745	Sema6a	ENSMUSG00000019647	20358	sema domain, transmembrane domain (TM), and cytoplasmic domain, (semaphorin) 6A
Sptb	-1.577748639	0.000119464	0.000235641	107	105	108	23	27	59	0.53080907	0.490505766	0.798467468	-0.967364529	-1.295061236	-0.651037847	Sptb	ENSMUSG00000021061	20741	spectrin beta, erythrocytic
1810062G17Rik	-1.577211727	1.57E-05	3.79E-05	208	156	126	32	54	73	1.482880373	1.056887844	1.019176345	-0.502235672	-0.32041632	-0.350038627	1810062G17Rik	ENSMUSG00000027713	72282	RIKEN cDNA 1810062G17 gene
Sh2d3c	-1.576413486	1.23E-08	8.74E-08	643	728	609	145	201	311	3.106148902	3.271522997	3.284156459	1.65488279	1.556918347	1.720786764	Sh2d3c	ENSMUSG00000059013	27387	SH2 domain containing 3C
Il11	-1.576025931	3.67E-08	2.09E-07	754	669	705	146	251	309	3.335544427	3.149777827	3.495051118	1.664753702	1.87602263	1.711519246	Il11	ENSMUSG00000004371	16156	interleukin 11
Gm2115	-1.574362921	7.77E-11	1.72E-09	2170	2142	1899	445	649	982	4.859278284	4.827070095	4.923453066	3.268242998	3.243127274	3.375342411	Gm2115	NA	100039239	predicted gene 2115
Ier3	-1.573702727	5.16E-13	5.58E-11	14276	15103	11974	3036	4305	6371	7.576504555	7.644255407	7.579478342	6.036721899	5.97101163	6.071396595	Ier3	ENSMUSG00000003541	15937	immediate early response 3
Sgcd	-1.573264797	1.09E-06	3.65E-06	533	549	463	146	134	221	2.835956582	2.86508218	2.889389364	1.664753702	0.975432805	1.230447229	Sgcd	ENSMUSG00000020354	24052	sarcoglycan, delta (dystrophin-associated glycoprotein)
Ucp2	-1.568929284	2.62E-09	2.57E-08	3212	2929	2534	708	983	1114	5.424826169	5.278325888	5.339460517	3.937397009	3.841364925	3.557062789	Ucp2	ENSMUSG00000033685	22228	uncoupling protein 2 (mitochondrial, proton carrier)
Fndc7	-1.565082137	0.000627803	0.001071486	103	82	105	31	22	40	0.476393142	0.137896145	0.758161957	-0.547103703	-1.579137762	-1.196553701	Fndc7	ENSMUSG00000045326	320181	fibronectin type III domain containing 7
Avil	-1.562955192	3.94E-05	8.66E-05	166	146	195	42	56	64	1.159333203	0.961984437	1.645645913	-0.116843135	-0.268862733	-0.536196154	Avil	ENSMUSG00000025432	11567	advillin
Shox2	-1.562749252	6.01E-11	1.46E-09	4157	4647	3640	853	1457	1865	5.796788615	5.944022186	5.861828709	4.205966084	4.408637479	4.29978819	Shox2	ENSMUSG00000027833	20429	short stature homeobox 2
Rnasel	-1.562569392	5.64E-05	0.000119531	279	238	209	36	80	155	1.904695692	1.662906939	1.745236109	-0.335538148	0.238286988	0.722381723	Rnasel	ENSMUSG00000066800	24014	ribonuclease L (2', 5'-oligoisoadenylate synthetase-dependent)
Hapln3	-1.56052184	0.000384248	0.000683329	72	77	98	17	29	34	-0.033856806	0.048339103	0.659491141	-1.389396011	-1.195438616	-1.422757456	Hapln3	ENSMUSG00000030606	67666	hyaluronan and proteoglycan link protein 3
Spink10	-1.559171646	0.000378638	0.000674583	119	107	101	15	42	64	0.682729332	0.517454675	0.702607511	-1.56283076	-0.675696506	-0.536196154	Spink10	ENSMUSG00000044176	328971	serine peptidase inhibitor, Kazal type 10
Fam124a	-1.558918211	4.40E-10	6.50E-09	2510	2431	1941	539	674	1082	5.069175005	5.009575713	4.954998672	3.544352094	3.297577137	3.515065527	Fam124a	ENSMUSG00000035184	629059	family with sequence similarity 124, member A
Zc2hc1c	-1.558545394	9.17E-07	3.15E-06	333	347	275	75	86	161	2.159065296	2.2048475	2.139697564	0.709851198	0.341411556	0.776711422	Zc2hc1c	ENSMUSG00000045064	72350	zinc finger, C2HC-type containing 1C
Cyp2s1	-1.557340354	0.001354445	0.002181028	95	95	83	25	16	58	0.3609876	0.34764984	0.422162616	-0.850278119	-2.015797488	-0.6751454	Cyp2s1	ENSMUSG00000040703	74134	cytochrome P450, family 2, subfamily s, polypeptide 1
Gsap	-1.555331833	1.26E-07	5.84E-07	667	594	507	153	187	233	3.158931324	2.978525944	3.020122969	1.73202136	1.453282264	1.306281113	Gsap	ENSMUSG00000039934	212167	gamma-secretase activating protein
Mvb12b	-1.555186435	7.69E-12	3.21E-10	12889	12326	11412	2746	4212	5254	7.429064633	7.351148023	7.510130093	5.891914686	5.939511039	5.793357719	Mvb12b	ENSMUSG00000038740	72543	multivesicular body subunit 12B
Fmo5	-1.55485834	0.004450105	0.006590879	78	86	97	11	59	31	0.080006337	0.205742705	0.644827833	-1.988449026	-0.194830132	-1.550718985	Fmo5	ENSMUSG00000028088	14263	flavin containing monooxygenase 5
Aldh1a3	-1.554752102	2.20E-09	2.23E-08	1065	1103	967	213	364	489	3.833168731	3.870224043	3.950451409	2.207605037	2.410540188	2.371442653	Aldh1a3	ENSMUSG00000015134	56847	aldehyde dehydrogenase family 1, subfamily A3
Chchd5	-1.549457872	2.63E-11	7.85E-10	2919	3006	2503	590	945	1334	5.286876352	5.315749183	5.32170855	3.674629994	3.784545303	3.816785172	Chchd5	ENSMUSG00000037938	66170	coiled-coil-helix-coiled-coil-helix domain containing 5
Rbm38	-1.546752887	5.37E-10	7.49E-09	3427	3025	2753	691	1106	1272	5.51827055	5.324836086	5.459008355	3.902366254	4.011294046	3.748196029	Rbm38	ENSMUSG00000027510	56190	RNA binding motif protein 38
Espn	-1.545572953	1.41E-08	9.74E-08	1245	1171	1173	294	410	483	4.058253232	3.956450981	4.228833909	2.671345403	2.581793307	2.353680553	Espn	ENSMUSG00000028943	56226	espin
Fam122b	-1.54508428	1.52E-12	1.11E-10	5623	5927	4625	1202	1792	2448	6.23248984	6.294952738	6.207268603	4.700463019	4.707026923	4.691968398	Fam122b	ENSMUSG00000036022	78755	family with sequence similarity 122, member B
Homez	-1.544594218	5.22E-11	1.31E-09	3596	3541	3044	697	1185	1606	5.587696374	5.551983309	5.603927584	3.914827406	4.11074503	4.084252177	Homez	ENSMUSG00000057156	239099	homeodomain leucine zipper-encoding gene
Dapk1	-1.54458298	0.000170669	0.000325634	97	123	86	17	39	50	0.390715928	0.716639429	0.472854541	-1.389396011	-0.780096843	-0.884046189	Dapk1	ENSMUSG00000021559	69635	death associated protein kinase 1
Nqo1	-1.543428805	2.37E-12	1.45E-10	6630	6885	5534	1417	2016	3036	6.470117284	6.511071033	6.466092342	4.937746335	4.876864778	5.002383131	Nqo1	ENSMUSG00000003849	18104	NAD(P)H dehydrogenase, quinone 1
Slc52a3	-1.543343715	0.003238914	0.004910699	81	51	91	26	19	24	0.133736175	-0.535958156	0.553573205	-0.795115714	-1.781009857	-1.902554351	Slc52a3	ENSMUSG00000027463	69698	solute carrier protein family 52, member 3
Tbc1d30	-1.542031246	0.000453356	0.000794737	78	80	53	17	22	28	0.080006337	0.102737597	-0.21632867	-1.389396011	-1.579137762	-1.691144701	Tbc1d30	ENSMUSG00000052302	74694	TBC1 domain family, member 30
Krt17	-1.541266583	0.001193083	0.001942324	69	80	129	24	30	32	-0.094345846	0.102737597	1.052888607	-0.907633835	-1.148093636	-1.50679192	Krt17	ENSMUSG00000035557	16667	keratin 17
Rap2b	-1.538182305	1.53E-10	2.95E-09	11896	10979	9178	2320	3977	4511	7.313410772	7.184205375	7.195857505	5.64877121	5.856705888	5.573449641	Rap2b	ENSMUSG00000036894	74012	RAP2B, member of RAS oncogene family
Rnf157	-1.53774902	1.99E-09	2.07E-08	979	1075	870	232	318	429	3.711822315	3.833164397	3.798098647	2.330513169	2.216185732	2.183139399	Rnf157	ENSMUSG00000052949	217340	ring finger protein 157
Dusp5	-1.537450565	2.83E-11	8.34E-10	3885	3478	3195	799	1160	1618	5.699186265	5.526092307	5.67375525	4.111690861	4.080008329	4.094982935	Dusp5	ENSMUSG00000034765	240672	dual specificity phosphatase 5
Abcg2	-1.535423543	2.22E-10	3.87E-09	3464	3593	3082	806	1011	1642	5.533758515	5.573009081	5.621820893	4.124264905	3.88184502	4.116207933	Abcg2	ENSMUSG00000029802	26357	ATP-binding cassette, sub-family G (WHITE), member 2
Omp	-1.533988445	0.000228419	0.000425065	150	154	114	39	29	78	1.014090419	1.038400035	0.875849955	-0.222050665	-1.195438616	-0.256135646	Omp	ENSMUSG00000074006	18378	olfactory marker protein
Veph1	-1.528311534	2.51E-05	5.77E-05	174	205	143	30	62	94	1.22681553	1.448610275	1.200565706	-0.59341205	-0.124411835	0.008880794	Veph1	ENSMUSG00000027831	72789	ventricular zone expressed PH domain-containing 1
Tcam1	-1.527130678	3.39E-06	9.84E-06	277	259	228	47	87	139	1.894356047	1.784372843	1.870257708	0.043063281	0.357904445	0.566626836	Tcam1	ENSMUSG00000020712	75870	testicular cell adhesion molecule 1
Bdh2	-1.52612169	0.000319001	0.000578254	94	111	72	19	40	33	0.345890516	0.569887759	0.219381952	-1.234591254	-0.744450671	-1.464162917	Bdh2	ENSMUSG00000028167	69772	3-hydroxybutyrate dehydrogenase, type 2
Gnao1	-1.523683445	2.46E-06	7.40E-06	303	303	213	68	96	105	2.023314957	2.00987472	1.772471845	0.569784016	0.498424149	0.166403023	Gnao1	ENSMUSG00000031748	14681	guanine nucleotide binding protein, alpha O
Klhdc7a	-1.522672158	1.68E-05	4.02E-05	222	175	211	38	76	99	1.576394263	1.221627304	1.758918247	-0.258896737	0.165200119	0.082619958	Klhdc7a	ENSMUSG00000078234	242721	kelch domain containing 7A
Mok	-1.521088459	3.20E-05	7.17E-05	159	153	133	27	61	68	1.097580445	1.029066521	1.096646803	-0.741985034	-0.147504793	-0.45048178	Mok	ENSMUSG00000056458	26448	MOK protein kinase
Pkp2	-1.520433454	4.80E-11	1.24E-09	3135	3028	2667	713	947	1349	5.389831432	5.326265642	5.413236587	3.947540349	3.78759226	3.83290069	Pkp2	ENSMUSG00000041957	67451	plakophilin 2
Casz1	-1.520394631	1.93E-08	1.25E-07	866	762	700	194	259	329	3.535084462	3.337280889	3.48479576	2.073242532	1.921114975	1.80161971	Casz1	ENSMUSG00000028977	69743	castor zinc finger 1
Ctnnd2	-1.51946535	1.93E-05	4.54E-05	194	208	189	51	76	69	1.382882292	1.469461643	1.60076585	0.159339525	0.165200119	-0.429825908	Ctnnd2	ENSMUSG00000022240	18163	catenin (cadherin associated protein), delta 2
Afmid	-1.519046346	7.25E-09	5.78E-08	1513	1438	1149	338	398	669	4.339301654	4.252528555	4.199032513	2.872133821	2.539040989	2.822548875	Afmid	ENSMUSG00000017718	71562	arylformamidase
Fam189b	-1.516802814	3.32E-07	1.31E-06	911	881	651	224	274	307	3.6080812	3.546358118	3.380236102	2.28003254	2.002042625	1.70219181	Fam189b	ENSMUSG00000032657	68521	family with sequence similarity 189, member B
Kctd17	-1.514978657	2.79E-11	8.29E-10	7519	7485	6481	1608	2646	3123	6.651621895	6.631598691	6.693952274	5.12009459	5.269016195	5.043126106	Kctd17	ENSMUSG00000033287	72844	potassium channel tetramerisation domain containing 17
2310001H17Rik	-1.509589691	2.84E-05	6.44E-05	143	150	116	29	41	74	0.945639483	1.000698117	0.900748461	-0.641256261	-0.709664052	-0.330762699	2310001H17Rik	ENSMUSG00000097354	76432	RIKEN cDNA 2310001H17 gene
Cnih2	-1.504816364	1.28E-05	3.15E-05	244	199	239	43	86	114	1.71209627	1.405981063	1.937976596	-0.083412475	0.341411556	0.283605755	Cnih2	ENSMUSG00000024873	12794	cornichon family AMPA receptor auxiliary protein 2
Fbxw7	-1.492495704	2.51E-12	1.50E-10	6639	6464	5196	1442	2043	2889	6.472074052	6.420056204	6.375186202	4.962966153	4.89604913	4.930814062	Fbxw7	ENSMUSG00000028086	50754	F-box and WD-40 domain protein 7
Selp	-1.491935851	0.015319656	0.020941381	88	91	23	19	21	16	0.251831812	0.286296314	-1.389974612	-1.234591254	-1.643340287	-2.449722497	Selp	ENSMUSG00000026580	20344	selectin, platelet
Sbk1	-1.491649449	1.12E-12	9.31E-11	10952	10691	9482	2374	3686	4853	7.194139672	7.145859319	7.242864611	5.681957052	5.747109304	5.678848899	Sbk1	ENSMUSG00000042978	104175	SH3-binding kinase 1
Il1rl2	-1.488846749	7.71E-06	2.02E-05	190	207	140	43	59	81	1.352990416	1.462544618	1.170168367	-0.083412475	-0.194830132	-0.202594239	Il1rl2	ENSMUSG00000070942	107527	interleukin 1 receptor-like 2
Id2	-1.487438984	2.44E-11	7.46E-10	5767	6331	5110	1291	1905	2926	6.268964013	6.390067427	6.351112215	4.803460809	4.79520076	4.949165135	Id2	ENSMUSG00000020644	15902	inhibitor of DNA binding 2
Cdc42ep2	-1.487132301	1.03E-07	4.92E-07	951	912	793	238	251	442	3.670004825	3.596190323	3.664547096	2.367247261	1.87602263	2.226075448	Cdc42ep2	ENSMUSG00000045664	104252	CDC42 effector protein (Rho GTPase binding) 2
Mfsd7c	-1.486050079	6.91E-08	3.51E-07	511	515	436	110	156	256	2.775267852	2.773034072	2.802876501	1.258401776	1.193275835	1.441350576	Mfsd7c	ENSMUSG00000034258	217721	major facilitator superfamily domain containing 7C
Tmeff2	-1.486008235	2.98E-07	1.20E-06	509	467	483	106	192	216	2.769621974	2.632192185	2.950285877	1.205285605	1.491155478	1.197634248	Tmeff2	ENSMUSG00000026109	56363	transmembrane protein with EGF-like and two follistatin-like domains 2
Triobp	-1.485225053	5.14E-13	5.58E-11	12490	12469	10423	2804	4143	5417	7.383701572	7.367787656	7.379359684	5.922062274	5.915686982	5.837424495	Triobp	ENSMUSG00000033088	110253	TRIO and F-actin binding protein
Tbxa2r	-1.483325649	0.00056079	0.000966751	91	128	97	34	36	34	0.299627566	0.773637917	0.644827833	-0.416480596	-0.892645578	-1.422757456	Tbxa2r	ENSMUSG00000034881	21390	thromboxane A2 receptor
Creld1	-1.482260804	1.61E-06	5.14E-06	385	364	265	93	105	146	2.367781946	2.273642756	2.086433712	1.017765266	0.626463706	0.636847029	Creld1	ENSMUSG00000030284	171508	cysteine-rich with EGF-like domains 1
Zfand1	-1.481518584	2.32E-09	2.33E-08	2844	2269	2045	574	783	1145	5.249337444	4.91012783	5.03026581	3.635010492	3.513550804	3.596614034	Zfand1	ENSMUSG00000039795	66361	zinc finger, AN1-type domain 1
Pcx	-1.481502805	4.45E-12	2.16E-10	7610	7186	6372	1581	2517	3420	6.668975111	6.572793906	6.669485492	5.095674611	5.196935577	5.174135905	Pcx	ENSMUSG00000024892	18563	pyruvate carboxylase
3110045C21Rik	-1.481450159	1.38E-05	3.39E-05	196	198	129	42	61	74	1.397599139	1.398752103	1.052888607	-0.116843135	-0.147504793	-0.330762699	3110045C21Rik	ENSMUSG00000097503	67303	RIKEN cDNA 3110045C21 gene
2500002B13Rik	-1.478234864	1.15E-05	2.87E-05	287	381	255	74	130	112	1.945328799	2.339306265	2.031127739	0.690655108	0.932031955	0.258371149	2500002B13Rik	ENSMUSG00000096917	78353	RIKEN cDNA 2500002B13 gene
Fam53b	-1.478015742	1.50E-10	2.90E-09	2999	2732	2585	677	932	1319	5.325869667	5.177913239	5.368198292	3.872864706	3.764581663	3.800487601	Fam53b	ENSMUSG00000030956	77938	family with sequence similarity 53, member B
Clic6	-1.473351076	0.002897438	0.004435433	109	86	68	32	16	46	0.557266221	0.205742705	0.137954426	-0.502235672	-2.015797488	-1.001056717	Clic6	ENSMUSG00000022949	209195	chloride intracellular channel 6
Trp53inp1	-1.47275916	3.08E-12	1.72E-10	57653	55923	44999	11723	18613	26463	9.590227683	9.532787271	9.489387506	7.985588776	8.082986031	8.125550174	Trp53inp1	ENSMUSG00000028211	60599	transformation related protein 53 inducible nuclear protein 1
Taf9b	-1.470257642	4.53E-06	1.27E-05	358	485	414	122	130	179	2.263182379	2.686631748	2.728335118	1.406936912	0.932031955	0.92840745	Taf9b	ENSMUSG00000047242	407786	TATA-box binding protein associated factor 9B
Dusp6	-1.469821875	3.51E-12	1.86E-10	16672	16243	13192	3772	5048	7511	7.800324508	7.749231187	7.719226582	6.349818899	6.200662235	6.30883552	Dusp6	ENSMUSG00000019960	67603	dual specificity phosphatase 6
Hist3h2bb-ps	-1.469522651	2.26E-06	6.89E-06	245	311	254	61	103	121	1.717971351	2.047340664	2.025478721	0.414641363	0.598976348	0.368605071	Hist3h2bb-ps	ENSMUSG00000080712	382522	histone cluster 3, H2bb, pseudogene
Pla2g16	-1.469426308	1.00E-11	3.89E-10	5275	5232	4758	1185	1753	2531	6.14033886	6.115047877	6.24816276	4.679924485	4.67529973	4.740046358	Pla2g16	ENSMUSG00000060675	225845	phospholipase A2, group XVI
Noxo1	-1.467956908	1.85E-08	1.21E-07	888	871	751	215	304	355	3.571233333	3.529908948	3.586129479	2.221047011	2.151433301	1.910920723	Noxo1	ENSMUSG00000019320	71893	NADPH oxidase organizer 1
Sgsm2	-1.467344865	1.38E-09	1.53E-08	3243	2952	2540	776	970	1298	5.438678741	5.289606304	5.342871295	4.06958713	3.822177408	3.777357206	Sgsm2	ENSMUSG00000038351	97761	small G protein signaling modulator 2
Map1b	-1.466189538	3.37E-11	9.45E-10	12456	12024	9061	2750	3882	5127	7.379769279	7.315363393	7.177349781	5.894014178	5.821834095	5.758065566	Map1b	ENSMUSG00000052727	17755	microtubule-associated protein 1B
4933433H22Rik	-1.465345106	2.60E-05	5.95E-05	145	176	148	43	49	70	0.96553053	1.229797901	1.249846587	-0.083412475	-0.457986214	-0.409461609	4933433H22Rik	NA	74473	RIKEN cDNA 4933433H22 gene
Fam179a	-1.465063302	0.000406757	0.000719119	154	163	143	45	32	97	1.051794794	1.119790866	1.200565706	-0.018789082	-1.057824439	0.053574984	Fam179a	ENSMUSG00000045761	320159	family with sequence similarity 179, member A
Top1mt	-1.462962041	5.00E-11	1.27E-09	2418	2554	2133	559	806	1185	5.015325101	5.080753719	5.09102307	3.596852283	3.55526715	3.646096335	Top1mt	ENSMUSG00000000934	72960	DNA topoisomerase 1, mitochondrial
Dmpk	-1.462141585	5.16E-10	7.29E-09	2034	1983	1608	470	673	832	4.765950108	4.715854156	4.683602723	3.346985321	3.295438146	3.136558765	Dmpk	ENSMUSG00000030409	13400	dystrophia myotonica-protein kinase
Cd151	-1.459705664	6.63E-12	2.88E-10	17858	18897	17047	4326	6323	8599	7.899461738	7.967556917	8.089059165	6.547490724	6.525503382	6.503966723	Cd151	ENSMUSG00000025510	12476	CD151 antigen
Tctn1	-1.459242065	3.92E-11	1.06E-09	4850	4511	3618	1065	1500	2026	6.019177961	5.901179858	5.853084808	4.5259809	4.450571453	4.41916408	Tctn1	ENSMUSG00000038593	654470	tectonic family member 1
Mmel1	-1.458845291	0.011287014	0.015746633	96	77	41	33	19	18	0.375928336	0.048339103	-0.579748405	-0.458721058	-1.781009857	-2.292285925	Mmel1	ENSMUSG00000058183	27390	membrane metallo-endopeptidase-like 1
Pla2g6	-1.458844664	5.85E-11	1.44E-09	4083	3961	3376	977	1271	1799	5.770882113	5.713644867	5.753232708	4.401638022	4.21174177	4.247845903	Pla2g6	ENSMUSG00000042632	53357	phospholipase A2, group VI
Doc2g	-1.454064819	5.52E-07	2.02E-06	664	604	511	175	184	261	3.152438166	3.002568532	3.031440746	1.925069198	1.430071725	1.469112064	Doc2g	ENSMUSG00000024871	60425	double C2, gamma
Hsf2bp	-1.453349071	8.05E-05	0.000165004	113	142	114	24	48	63	0.608767987	0.922203189	0.875849955	-0.907633835	-0.48714746	-0.558444785	Hsf2bp	ENSMUSG00000002076	74377	heat shock transcription factor 2 binding protein
Gnaz	-1.451452628	0.001656353	0.002629616	93	66	106	14	33	55	0.330633775	-0.170755454	0.771722629	-1.658050119	-1.014723174	-0.749983641	Gnaz	ENSMUSG00000040009	14687	guanine nucleotide binding protein, alpha z subunit
Plk2	-1.450283452	6.23E-12	2.80E-10	61540	66548	54243	15279	20280	29899	9.684354767	9.783736407	9.758926679	8.367778275	8.206726869	8.301662354	Plk2	ENSMUSG00000021701	20620	polo-like kinase 2
Frmd8	-1.448517661	1.32E-11	4.73E-10	15679	15231	13486	3732	5369	6726	7.711736694	7.656430063	7.751023662	6.334440901	6.289587078	6.149609458	Frmd8	ENSMUSG00000024816	67457	FERM domain containing 8
Dnah2	-1.448060533	0.008709502	0.012371418	128	131	96	53	52	23	0.78701398	0.806786486	0.630013959	0.214142289	-0.373880624	-1.96062884	Dnah2	ENSMUSG00000005237	327954	dynein, axonemal, heavy chain 2
Plcxd1	-1.447762474	0.000196923	0.000370646	96	111	71	23	31	42	0.375928336	0.569887759	0.199451867	-0.967364529	-1.102253137	-1.128401796	Plcxd1	ENSMUSG00000064247	403178	phosphatidylinositol-specific phospholipase C, X domain containing 1
Akap6	-1.446841934	3.71E-05	8.20E-05	145	179	118	40	47	66	0.96553053	1.254035668	0.92522454	-0.186122245	-0.516910324	-0.492702495	Akap6	ENSMUSG00000061603	238161	A kinase (PRKA) anchor protein 6
Arhgap6	-1.446327581	1.23E-05	3.06E-05	235	272	161	47	89	101	1.658115309	1.854743147	1.370614415	0.043063281	0.390335139	0.111091707	Arhgap6	ENSMUSG00000031355	11856	Rho GTPase activating protein 6
Arntl2	-1.445889255	2.61E-10	4.43E-09	1927	1886	1585	444	660	825	4.688028806	4.643539245	4.662829724	3.265002127	3.267338762	3.12438912	Arntl2	ENSMUSG00000040187	272322	aryl hydrocarbon receptor nuclear translocator-like 2
Gls2	-1.443142153	2.40E-08	1.48E-07	1024	1088	971	270	319	529	3.776588561	3.850489121	3.956401357	2.548774468	2.220701571	2.484576542	Gls2	ENSMUSG00000044005	216456	glutaminase 2 (liver, mitochondrial)
Pold4	-1.442315219	8.75E-09	6.65E-08	1266	1306	1320	312	475	622	4.082364498	4.113728396	4.399047154	2.756889744	2.793628609	2.717676038	Pold4	ENSMUSG00000024854	69745	polymerase (DNA-directed), delta 4
Zfp692	-1.442302264	4.22E-10	6.32E-09	2946	2698	2063	623	899	1239	5.300154763	5.159853235	5.042903319	3.753062227	3.71262815	3.710314148	Mllt11	ENSMUSG00000053192	56772	myeloid/lymphoid or mixed-lineage leukemia; translocated to, 11
Fam83h	-1.44063928	1.12E-12	9.31E-11	27931	25846	22289	6076	9192	12257	8.544727508	8.419318718	8.475855494	7.037515851	7.065203556	7.015264472	Fam83h	ENSMUSG00000046761	105732	family with sequence similarity 83, member H
B3gnt4	-1.440144235	8.16E-06	2.13E-05	219	199	200	56	64	101	1.556859548	1.405981063	1.682008104	0.292630423	-0.079306119	0.111091707	B3gnt4	ENSMUSG00000029431	231727	UDP-GlcNAc:betaGal beta-1,3-N-acetylglucosaminyltransferase 4
B930041F14Rik	-1.439382559	4.59E-09	4.03E-08	1144	1135	1012	290	381	505	3.936303098	3.911444055	4.016013984	2.651626502	2.476220811	2.417766145	Fndc10	ENSMUSG00000074738	230991	fibronectin type III domain containing 10
Camk2n1	-1.438737207	0.000939597	0.001554534	184	200	148	23	94	104	1.306958242	1.413173981	1.249846587	-0.967364529	0.468358994	0.152772725	Camk2n1	ENSMUSG00000046447	66259	calcium/calmodulin-dependent protein kinase II inhibitor 1
Hsdl2	-1.436511415	1.41E-11	4.99E-10	4873	5330	4433	1190	1687	2459	6.026001946	6.141815435	6.146110608	4.685995642	4.619965073	4.698433029	Hsdl2	ENSMUSG00000028383	72479	hydroxysteroid dehydrogenase like 2
Ptpdc1	-1.435187652	1.67E-11	5.65E-10	4510	4292	3533	998	1410	2089	5.914344459	5.829400138	5.818794676	4.432298882	4.361363913	4.463313522	Ptpdc1	ENSMUSG00000038042	218232	protein tyrosine phosphatase domain containing 1
Map3k8	-1.434958249	3.43E-09	3.20E-08	1197	1174	963	264	368	597	4.00157995	3.960138941	3.944476822	2.516432553	2.426265624	2.658622788	Map3k8	ENSMUSG00000024235	26410	mitogen-activated protein kinase kinase kinase 8
Lingo1	-1.43431228	0.001088997	0.001782954	117	134	139	18	64	78	0.658494422	0.839190482	1.15989191	-1.309918261	-0.079306119	-0.256135646	Lingo1	ENSMUSG00000049556	235402	leucine rich repeat and Ig domain containing 1
Scd2	-1.434093392	7.76E-12	3.22E-10	32107	32649	26789	7568	11486	13933	8.745741016	8.756404033	8.741154666	7.354275329	7.386598768	7.20014544	Scd2	ENSMUSG00000025203	20250	stearoyl-Coenzyme A desaturase 2
Oxld1	-1.429340103	2.88E-08	1.71E-07	1015	1003	907	213	404	465	3.763865827	3.733252513	3.858125722	2.207605037	2.560575505	2.299043212	Oxld1	ENSMUSG00000039670	66431	oxidoreductase like domain containing 1
Itga3	-1.428085208	6.98E-12	2.99E-10	11866	11136	9956	2663	4135	5216	7.309768233	7.204687851	7.31323301	5.847646241	5.912899148	5.782888079	Itga3	ENSMUSG00000001507	16400	integrin alpha 3
Bbs7	-1.426065889	6.22E-09	5.11E-08	1324	1344	1005	315	455	545	4.146937241	4.155073182	4.006009014	2.77066668	2.731697498	2.527457591	Bbs7	ENSMUSG00000037325	71492	Bardet-Biedl syndrome 7 (human)
Gcnt2	-1.423829248	3.84E-09	3.50E-08	1731	1793	1519	435	532	895	4.533367938	4.570627567	4.60150389	3.235501939	2.956810766	3.241698945	Gcnt2	ENSMUSG00000021360	14538	glucosaminyl (N-acetyl) transferase 2, I-branching enzyme
Npr1	-1.423215047	6.66E-10	8.87E-09	1455	1528	1309	344	543	685	4.282949159	4.34004612	4.386982481	2.897470338	2.986283269	2.856579012	Npr1	ENSMUSG00000027931	18160	natriuretic peptide receptor 1
Marcksl1	-1.423034386	1.20E-12	9.76E-11	34085	32747	29717	7934	11546	15980	8.831987361	8.760727832	8.890797701	7.422405863	7.394114796	7.397889076	Marcksl1	ENSMUSG00000047945	17357	MARCKS-like 1
Pak6	-1.42289742	3.54E-09	3.30E-08	2070	2001	1717	531	685	861	4.791248103	4.728883634	4.778174751	3.522805134	3.320899078	3.185910016	Pak6	ENSMUSG00000074923	214230	p21 protein (Cdc42/Rac)-activated kinase 6
Misp	-1.421846691	0.000658269	0.001118495	103	91	101	16	42	59	0.476393142	0.286296314	0.702607511	-1.473508754	-0.675696506	-0.651037847	Misp	ENSMUSG00000035852	78906	mitotic spindle positioning
Ak1	-1.420733751	4.45E-13	5.32E-11	27491	27989	24447	6463	9653	13370	8.521820546	8.534233058	8.60917596	7.126588636	7.135794831	7.140644844	Ak1	ENSMUSG00000026817	11636	adenylate kinase 1
Met	-1.419333472	1.83E-12	1.23E-10	10333	9880	8147	2244	3494	4716	7.110212876	7.032057335	7.023964288	5.600732908	5.6699538	5.637547373	Met	ENSMUSG00000009376	17295	met proto-oncogene
Cetn4	-1.417959822	1.26E-05	3.12E-05	255	248	176	67	71	102	1.775442637	1.72202461	1.498453825	0.548616335	0.068305663	0.125119607	Cetn4	ENSMUSG00000045031	207175	centrin 4
Syt7	-1.417359302	0.001001667	0.001648496	105	155	99	25	67	41	0.50385765	1.047673554	0.674006911	-0.850278119	-0.014186317	-1.162075355	Syt7	ENSMUSG00000024743	54525	synaptotagmin VII
Hey2	-1.417322631	5.40E-10	7.52E-09	1621	1768	1391	408	550	791	4.438706332	4.550382543	4.474582085	3.143199613	3.004729789	3.063773664	Hey2	ENSMUSG00000019789	15214	hairy/enhancer-of-split related with YRPW motif 2
Iffo1	-1.416931893	6.72E-12	2.90E-10	5652	5278	4490	1275	1850	2536	6.239909861	6.127674111	6.164539018	4.785478261	4.752956967	4.742892084	Iffo1	ENSMUSG00000038271	320678	intermediate filament family orphan 1
Enkur	-1.416546109	0.000104823	0.000209331	147	155	165	39	43	97	0.985151055	1.047673554	1.405827689	-0.222050665	-0.642510346	0.053574984	Enkur	ENSMUSG00000026679	71233	enkurin, TRPC channel interacting protein
Il3ra	-1.416535477	1.53E-05	3.71E-05	242	206	252	49	92	122	1.70027384	1.45559427	2.01411389	0.102372519	0.437653935	0.380349115	Il3ra	ENSMUSG00000068758	16188	interleukin 3 receptor, alpha chain
Pak3	-1.416530318	1.73E-12	1.21E-10	6041	6214	5134	1388	2122	2925	6.335918329	6.363160872	6.357871047	4.907928109	4.950758969	4.948672217	Pak3	ENSMUSG00000031284	18481	p21 protein (Cdc42/Rac)-activated kinase 3
4930405A21Rik	-1.415391675	0.000429212	0.000755233	221	165	90	45	51	62	1.569912036	1.137270663	0.53778673	-0.018789082	-0.401374606	-0.581041906	4930405A21Rik	ENSMUSG00000086638	74846	RIKEN cDNA 4930405A21 gene
Unc13c	-1.415086816	4.60E-05	9.93E-05	187	157	157	33	59	103	1.330157915	1.066043657	1.334520106	-0.458721058	-0.194830132	0.139012421	Unc13c	ENSMUSG00000062151	208898	unc-13 homolog C (C. elegans)
Limk2	-1.414810709	5.25E-13	5.59E-11	11776	11481	9487	2674	3917	5496	7.298785109	7.248700868	7.243625094	5.853591815	5.834779869	5.858307259	Limk2	ENSMUSG00000020451	16886	LIM motif-containing protein kinase 2
Mroh6	-1.414180522	0.000881282	0.00146541	133	82	62	23	26	48	0.841850037	0.137896145	0.006488391	-0.967364529	-1.347576962	-0.941365503	Mroh6	ENSMUSG00000098678	223645	maestro heat-like repeat family member 6
Rnu12	-1.41403219	6.37E-07	2.29E-06	571	772	656	160	268	301	2.935120854	3.356064485	3.391259378	1.7962918	1.97021422	1.673842125	Rnu12	ENSMUSG00000065176	104307	RNA U12, small nuclear
Cd300lb	-1.413496586	0.000399172	0.000707288	111	136	86	28	51	39	0.583246908	0.860395739	0.472854541	-0.690741717	-0.401374606	-1.231876247	Cd300lb	ENSMUSG00000063193	217304	CD300 molecule like family member B
Spns2	-1.413142366	9.69E-07	3.31E-06	462	353	330	88	132	206	2.630154734	2.229504495	2.401957001	0.938612792	0.953895578	1.12968076	Spns2	ENSMUSG00000040447	216892	spinster homolog 2
G630090E17Rik	-1.413134747	0.001049717	0.001722651	97	106	121	17	55	57	0.390715928	0.504043144	0.96117725	-1.389396011	-0.29440926	-0.699662648	Mfsd4b3	ENSMUSG00000071335	100041085	major facilitator superfamily domain containing 4B3
Hspb1	-1.409902481	2.40E-07	1.00E-06	9318	9264	9332	2917	3001	4172	6.961062087	6.939191954	7.2198617	5.979048224	5.450583607	5.460776468	Hspb1	ENSMUSG00000004951	15507	heat shock protein 1
Eva1c	-1.409756206	3.29E-08	1.91E-07	741	725	603	184	255	311	3.310489046	3.26557432	3.269893156	1.99715617	1.898744969	1.720786764	Eva1c	ENSMUSG00000039903	70967	eva-1 homolog C (C. elegans)
Cdh3	-1.408265547	8.64E-07	2.99E-06	362	386	348	79	151	183	2.279165336	2.358063679	2.478377791	0.784178986	1.146574954	0.960056224	Cdh3	ENSMUSG00000061048	12560	cadherin 3
Ifnlr1	-1.405902098	1.80E-05	4.29E-05	227	242	149	50	83	88	1.608375577	1.686845481	1.259503931	0.131137182	0.2907705	-0.084888986	Ifnlr1	ENSMUSG00000062157	242700	interferon lambda receptor 1
Dusp18	-1.403875787	1.26E-08	8.90E-08	1282	1341	1177	323	510	562	4.100468263	4.151851853	4.233741503	2.806774667	2.895995577	2.571664014	Dusp18	ENSMUSG00000047205	75219	dual specificity phosphatase 18
9030617O03Rik	-1.4037943	4.91E-09	4.25E-08	2973	2845	2779	801	971	1386	5.313312074	5.236361932	5.472565223	4.115294641	3.823662465	3.871899223	9030617O03Rik	ENSMUSG00000021185	217830	RIKEN cDNA 9030617O03 gene
Ganc	-1.401348068	1.80E-09	1.91E-08	1911	1882	1673	494	609	921	4.676006666	4.640477939	4.740741791	3.418737795	3.151493117	3.282951282	Ganc	ENSMUSG00000062646	76051	glucosidase, alpha; neutral C
Arap2	-1.401069592	8.38E-06	2.17E-05	648	558	419	98	239	296	3.117305621	2.888495803	2.745617706	1.092800031	1.805626062	1.649784261	Arap2	ENSMUSG00000037999	212285	ArfGAP with RhoGAP domain, ankyrin repeat and PH domain 2
Gtse1	-1.400469422	1.69E-13	2.81E-11	33443	33400	27707	7881	11443	15873	8.80455551	8.789212266	8.789762862	7.412736969	7.381188093	7.38819731	Gtse1	ENSMUSG00000022385	29870	G two S phase expressed protein 1
Wdr35	-1.399496617	8.80E-12	3.54E-10	6265	6286	5002	1489	2039	3005	6.388436385	6.379778053	6.320299399	5.009218011	4.893223051	4.987582924	Wdr35	ENSMUSG00000066643	74682	WD repeat domain 35
Spata13	-1.399056174	3.05E-11	8.78E-10	3242	3222	2603	729	1151	1501	5.438233954	5.415826188	5.378205893	3.979527946	4.068780828	3.986788739	Spata13	ENSMUSG00000021990	219140	spermatogenesis associated 13
Ikbke	-1.398390015	8.18E-09	6.34E-08	2065	2252	1639	520	779	872	4.787760908	4.899283192	4.711136094	3.492642597	3.506171035	3.204196517	Ikbke	ENSMUSG00000042349	56489	inhibitor of kappaB kinase epsilon
Tmem151a	-1.397403776	1.82E-08	1.19E-07	1812	1800	1469	495	579	776	4.599305624	4.576245633	4.553245136	3.421651409	3.078733681	3.036199977	Tmem151a	ENSMUSG00000061451	381199	transmembrane protein 151A
Smarca2	-1.397011159	1.29E-08	9.07E-08	1144	1072	968	250	364	605	3.936303098	3.829136666	3.951941198	2.438023197	2.410540188	2.6777841	Smarca2	ENSMUSG00000024921	67155	SWI/SNF related, matrix associated, actin dependent regulator of chromatin, subfamily a, member 2
Glipr1	-1.396329164	0.000477035	0.000833134	144	175	154	45	36	108	0.955619287	1.221627304	1.306844124	-0.018789082	-0.892645578	0.206537884	Glipr1	ENSMUSG00000056888	73690	GLI pathogenesis-related 1 (glioma)
Lrrc71	-1.393605345	0.000510488	0.000886063	88	106	59	19	32	40	0.251831812	0.504043144	-0.064028316	-1.234591254	-1.057824439	-1.196553701	Lrrc71	ENSMUSG00000023084	74485	leucine rich repeat containing 71
Fam102a	-1.392891591	1.17E-09	1.36E-08	3248	3126	2883	812	1203	1406	5.440900623	5.372202209	5.525553583	4.134956114	4.132476872	3.892548657	Fam102a	ENSMUSG00000039157	98952	family with sequence similarity 102, member A
Dnaaf3	-1.389777732	0.00032282	0.000584338	120	161	97	35	54	45	0.694695813	1.102096682	0.644827833	-0.375441787	-0.32041632	-1.031854761	Dnaaf3	ENSMUSG00000055809	436022	dynein, axonemal assembly factor 3
Mylk3	-1.389598845	0.001732116	0.002740967	199	144	125	54	72	42	1.419396697	0.942230926	1.007761561	0.240782279	0.088212164	-1.128401796	Mylk3	ENSMUSG00000031698	213435	myosin light chain kinase 3
Mfap3l	-1.387020029	7.69E-11	1.71E-09	4246	4020	3394	915	1534	1961	5.827342515	5.734969938	5.760902354	4.307116873	4.48288667	4.372151178	Mfap3l	ENSMUSG00000031647	71306	microfibrillar-associated protein 3-like
Tub	-1.386316036	0.000416811	0.000735354	135	160	106	39	32	84	0.86321387	1.093167539	0.771722629	-0.222050665	-1.057824439	-0.150968966	Tub	ENSMUSG00000031028	22141	tubby candidate gene
Pnpla7	-1.38565065	4.86E-11	1.24E-09	5498	5601	4892	1243	2093	2760	6.200062894	6.213350294	6.28822451	4.748826432	4.930915802	4.864943515	Pnpla7	ENSMUSG00000036833	241274	patatin-like phospholipase domain containing 7
Arhgef3	-1.383654004	1.18E-08	8.44E-08	1052	1064	929	281	373	473	3.815467766	3.818340747	3.892668315	2.606248141	2.4456844	2.323582276	Arhgef3	ENSMUSG00000021895	71704	Rho guanine nucleotide exchange factor (GEF) 3
Tldc1	-1.383309863	2.07E-11	6.65E-10	4498	4175	3747	1018	1551	2134	5.910501592	5.789536355	5.903616177	4.460906082	4.498776832	4.494041623	Tldc1	ENSMUSG00000034105	74347	TBC/LysM associated domain containing 1
Nr4a1	-1.382636962	6.89E-06	1.83E-05	2269	2304	2237	814	708	972	4.923609058	4.932201589	5.159676419	4.138502317	3.368477854	3.360596009	Nr4a1	ENSMUSG00000023034	15370	nuclear receptor subfamily 4, group A, member 1
Cdk18	-1.381893335	1.82E-09	1.93E-08	3528	3471	2902	919	1246	1490	5.560162124	5.523186636	5.535027354	4.313405487	4.18310399	3.976186632	Cdk18	ENSMUSG00000026437	18557	cyclin-dependent kinase 18
Sh3bgrl2	-1.37934157	1.57E-10	2.98E-09	2200	2372	1910	565	782	1088	4.879077142	4.974145647	4.931781911	3.612236888	3.511709398	3.523033703	Sh3bgrl2	ENSMUSG00000032261	212531	SH3 domain binding glutamic acid-rich protein like 2
Cdo1	-1.376464924	1.09E-06	3.64E-06	377	435	400	96	171	192	2.337572239	2.530028081	2.678812537	1.063252763	1.324940111	1.028825211	Cdo1	ENSMUSG00000033022	12583	cysteine dioxygenase 1, cytosolic
Plxnb2	-1.374023641	9.67E-12	3.78E-10	64129	60069	51873	14722	23116	28696	9.743806229	9.635964252	9.694474596	8.314204175	8.395552485	8.242417494	Plxnb2	ENSMUSG00000036606	140570	plexin B2
Tec	-1.371632289	4.56E-09	4.01E-08	1029	1049	817	230	359	522	3.783608565	3.797878038	3.707514852	2.318057638	2.390639242	2.465407708	Tec	ENSMUSG00000029217	21682	tec protein tyrosine kinase
Esrp2	-1.364454689	3.81E-07	1.48E-06	414	430	310	92	142	208	2.472276234	2.51339058	2.312009227	1.002278375	1.058503667	1.14352993	Esrp2	ENSMUSG00000084128	77411	epithelial splicing regulatory protein 2
Nmrk1	-1.361472159	6.90E-09	5.54E-08	918	990	832	218	354	489	3.619111489	3.714451564	3.733734032	2.240978021	2.370459933	2.371442653	Nmrk1	ENSMUSG00000037847	225994	nicotinamide riboside kinase 1
Col8a2	-1.36009947	5.42E-05	0.000115242	189	216	155	50	53	117	1.345419662	1.523635423	1.316128568	0.131137182	-0.346900822	0.320648883	Col8a2	ENSMUSG00000056174	329941	collagen, type VIII, alpha 2
Pqlc3	-1.360094708	1.25E-10	2.53E-09	5374	5569	4837	1448	1963	2560	6.167158738	6.205085744	6.271915624	4.96895387	4.838448136	4.756473977	Pqlc3	ENSMUSG00000045679	217430	PQ loop repeat containing
Smim3	-1.358368168	2.03E-10	3.63E-09	3813	3530	3236	948	1253	1849	5.672205642	5.547496009	5.692145842	4.358196167	4.191180036	4.287366785	Smim3	ENSMUSG00000038059	106878	small integral membrane protein 3
Rhbg	-1.357560609	2.58E-05	5.91E-05	265	248	268	68	77	167	1.830711931	1.72202461	2.102620358	0.569784016	0.183821874	0.829069184	Rhbg	ENSMUSG00000103766	58176	Rhesus blood group-associated B glycoprotein
Pik3ip1	-1.357379484	2.62E-09	2.57E-08	1013	1072	906	249	379	525	3.761023251	3.829136666	3.85653578	2.432256026	2.468647089	2.473654129	Pik3ip1	ENSMUSG00000034614	216505	phosphoinositide-3-kinase interacting protein 1
Ndrg2	-1.355915404	3.78E-07	1.47E-06	524	636	519	139	239	262	2.811437136	3.076918137	3.053813374	1.594195546	1.805626062	1.474600827	Ndrg2	ENSMUSG00000004558	29811	N-myc downstream regulated gene 2
Pdlim2	-1.355007488	2.11E-08	1.34E-07	1260	1479	1220	300	514	747	4.075516585	4.293057139	4.285469954	2.700427433	2.907245273	2.981348508	Pdlim2	ENSMUSG00000022090	213019	PDZ and LIM domain 2
Ckap2	-1.354904768	3.21E-12	1.75E-10	34620	34966	29006	8171	12001	18208	8.854455408	8.855314855	8.855861637	7.464866654	7.449871674	7.586179268	Ckap2	ENSMUSG00000037725	80986	cytoskeleton associated protein 2
Engase	-1.352014077	1.82E-07	7.94E-07	637	596	605	142	236	348	3.092645945	2.983366623	3.274663276	1.624858247	1.787476791	1.882298574	Engase	ENSMUSG00000033857	217364	endo-beta-N-acetylglucosaminidase
Homer3	-1.351639073	1.11E-12	9.29E-11	16800	16385	14141	3910	6038	8440	7.811357858	7.761787919	7.819440901	6.401648966	6.458975415	6.477045079	Homer3	ENSMUSG00000003573	26558	homer scaffolding protein 3
Ablim1	-1.350628671	9.12E-11	1.97E-09	7265	6941	5889	1756	2698	3214	6.602051015	6.522756095	6.555778404	5.247070384	5.297083242	5.084545874	Ablim1	ENSMUSG00000025085	226251	actin-binding LIM protein 1
Zscan10	-1.350613459	0.00113523	0.001854575	88	95	56	15	35	43	0.251831812	0.34764984	-0.138169698	-1.56283076	-0.932201353	-1.095496309	Zscan10	ENSMUSG00000023902	332221	zinc finger and SCAN domain containing 10
Hoxd10	-1.350039226	6.22E-09	5.11E-08	1867	1855	1392	468	663	796	4.642419701	4.619642452	4.475618214	3.340841698	3.273871981	3.072849011	Hoxd10	ENSMUSG00000050368	15430	homeobox D10
Cyp4f17	-1.350035182	6.87E-09	5.53E-08	2059	1827	1725	527	709	890	4.783565117	4.59771267	4.784877611	3.511909762	3.370511324	3.233628765	Cyp4f17	ENSMUSG00000091586	208285	cytochrome P450, family 4, subfamily f, polypeptide 17
Tcaf1	-1.348774773	2.31E-12	1.43E-10	12436	12777	10489	2938	4484	6514	7.377451149	7.402988034	7.38846547	5.989394912	6.029771634	6.10341379	Tcaf1	ENSMUSG00000036667	77574	TRPM8 channel-associated factor 1
Acss2	-1.348121424	1.68E-10	3.14E-09	2112	2065	1826	506	752	1077	4.820212457	4.774280306	4.866926912	3.45331871	3.455345099	3.508391596	Acss2	ENSMUSG00000027605	60525	acyl-CoA synthetase short-chain family member 2
H2-K1	-1.347576032	2.08E-12	1.32E-10	70097	70643	62275	16906	25958	36284	9.872179985	9.869886363	9.958139775	8.513757539	8.562833282	8.580887207	H2-K1	ENSMUSG00000061232	14972	histocompatibility 2, K1, K region
Pla2g12a	-1.346550446	3.32E-12	1.78E-10	7114	7192	6155	1755	2525	3675	6.571753668	6.573997812	6.619505177	5.246248877	5.201511979	5.277844462	Pla2g12a	ENSMUSG00000027999	66350	phospholipase A2, group XIIA
Zmat3	-1.345911983	1.52E-09	1.67E-08	18743	18034	15070	4202	7588	8276	7.96923906	7.900123043	7.911230581	6.505539683	6.788576771	6.448740282	Zmat3	ENSMUSG00000027663	22401	zinc finger matrin type 3
Lat2	-1.345215507	6.17E-05	0.00012952	197	160	134	43	50	99	1.404901646	1.093167539	1.107382073	-0.083412475	-0.429402747	0.082619958	Lat2	ENSMUSG00000040751	56743	linker for activation of T cells family, member 2
Cyth1	-1.344992907	4.88E-12	2.30E-10	4905	4860	4089	1190	1734	2450	6.035442809	6.008664271	6.029599642	4.685995642	4.659586417	4.693145942	Cyth1	ENSMUSG00000017132	19157	cytohesin 1
Tsc22d1	-1.343943255	6.76E-13	6.80E-11	20572	21339	17987	5086	7518	10742	8.103561963	8.142882903	8.166491947	6.780955795	6.775207733	6.824943521	Tsc22d1	ENSMUSG00000022010	21807	TSC22 domain family, member 1
Tpd52l1	-1.342203439	2.40E-07	1.00E-06	479	513	369	119	179	220	2.682170101	2.767432149	2.562702088	1.371212074	1.390537882	1.223944066	Tpd52l1	ENSMUSG00000000296	21987	tumor protein D52-like 1
Scn1b	-1.341626843	1.90E-11	6.17E-10	6409	6121	5431	1596	2180	3199	6.421215651	6.34140978	6.438991956	5.109292264	4.989644825	5.077799768	Scn1b	ENSMUSG00000019194	20266	sodium channel, voltage-gated, type I, beta
Fam196a	-1.340388328	2.46E-09	2.44E-08	1368	1263	1102	305	500	652	4.194065157	4.065468422	4.138825506	2.72422251	2.867481464	2.785490129	Fam196a	ENSMUSG00000073805	627214	family with sequence similarity 196, member A
Krba1	-1.340326855	9.19E-09	6.92E-08	1252	1076	905	269	410	577	4.066335177	3.83450448	3.854944085	2.543434248	2.581793307	2.609575622	Krba1	ENSMUSG00000042810	77827	KRAB-A domain containing 1
Kcnab3	-1.338214397	3.18E-07	1.26E-06	490	510	365	114	161	259	2.714854542	2.758988268	2.547015732	1.309631596	1.238512263	1.458071491	Kcnab3	ENSMUSG00000018470	16499	potassium voltage-gated channel, shaker-related subfamily, beta member 3
Pon2	-1.337992465	1.82E-12	1.23E-10	9235	9580	7985	2342	3326	4775	6.948155195	6.98757685	6.994990981	5.662383645	5.598882683	5.655479304	Pon2	ENSMUSG00000032667	330260	paraoxonase 2
1700001L05Rik	-1.337933844	0.002617916	0.004035822	98	86	68	33	20	43	0.405353484	0.205742705	0.137954426	-0.458721058	-1.71053355	-1.095496309	1700001L05Rik	NA	69291	RIKEN cDNA 1700001L05 gene
Itga11	-1.337245285	9.38E-05	0.000189464	170	168	148	33	81	81	1.193468893	1.163099563	1.249846587	-0.458721058	0.255994485	-0.202594239	Itga11	ENSMUSG00000032243	319480	integrin alpha 11
Ier5l	-1.336647332	2.80E-11	8.29E-10	8471	7819	6739	2080	2932	3864	6.823590485	6.694571657	6.750262791	5.491277044	5.417036415	5.350169479	Ier5l	ENSMUSG00000089762	72500	immediate early response 5-like
Ptprj	-1.333359344	1.29E-09	1.46E-08	7037	6445	5405	1691	2610	2952	6.556055563	6.41581007	6.432069846	5.192674932	5.249260268	4.961922247	Ptprj	ENSMUSG00000025314	19271	protein tyrosine phosphatase, receptor type, J
Fam169a	-1.331258331	0.002073648	0.003242939	95	81	105	30	44	31	0.3609876	0.120423971	0.758161957	-0.59341205	-0.610070431	-1.550718985	Fam169a	ENSMUSG00000041817	320557	family with sequence similarity 169, member A
Agpat4	-1.329606911	6.93E-11	1.61E-09	3120	3173	2448	753	1143	1507	5.382914367	5.393724626	5.289665325	4.026217606	4.058726942	3.992539035	Agpat4	ENSMUSG00000023827	68262	1-acylglycerol-3-phosphate O-acyltransferase 4 (lysophosphatidic acid acyltransferase, delta)
Wipi1	-1.329077467	4.13E-10	6.23E-09	3001	2890	2535	787	1076	1391	5.326831123	5.25899431	5.340029541	4.08987706	3.971656156	3.877089356	Wipi1	ENSMUSG00000041895	52639	WD repeat domain, phosphoinositide interacting 1
Trib1	-1.328522898	4.58E-11	1.19E-09	4647	4418	3869	1160	1692	2172	5.957506656	5.871133206	5.949830138	4.649179455	4.624232206	4.519489646	Trib1	ENSMUSG00000032501	211770	tribbles pseudokinase 1
Frat1	-1.327190933	4.90E-06	1.36E-05	273	290	249	59	112	158	1.873451757	1.946837814	1.996896998	0.367067924	0.718743541	0.749802304	Frat1	ENSMUSG00000067199	14296	frequently rearranged in advanced T cell lymphomas
Gm3219	-1.327159343	2.55E-05	5.87E-05	291	329	315	97	132	125	1.9652241	2.1282425	2.335027359	1.078102039	0.953895578	0.415018313	Gm3219	NA	100041231	B-cell CLL/lymphoma 7C pseudogene
Scmh1	-1.326064801	4.51E-11	1.18E-09	5561	5450	5020	1436	2081	2747	6.216497168	6.173929744	6.325480787	4.956953482	4.922624328	4.858135485	Scmh1	ENSMUSG00000000085	29871	sex comb on midleg homolog 1
Nbeal2	-1.325834908	6.16E-09	5.07E-08	1652	1526	1180	351	592	771	4.466018202	4.338157865	4.237411274	2.926477975	3.110714265	3.026890378	Nbeal2	ENSMUSG00000056724	235627	neurobeachin-like 2
Eno1b	-1.325374229	7.96E-12	3.29E-10	4989	5110	4298	1286	1834	2510	6.059935083	6.081015683	6.101501813	4.797865303	4.740431963	4.728032628	Eno1b	ENSMUSG00000059040	433182	enolase 1B, retrotransposed
Tnfrsf23	-1.323733039	4.28E-10	6.39E-09	1895	1901	1586	454	734	928	4.663883502	4.654961634	4.663739145	3.29708781	3.420438297	3.293859055	Tnfrsf23	ENSMUSG00000037613	79201	tumor necrosis factor receptor superfamily, member 23
Plec	-1.322420848	1.46E-10	2.85E-09	136646	122462	99805	32559	46189	60425	10.83518796	10.66359273	10.63859101	9.45925163	9.394179635	9.316677892	Plec	ENSMUSG00000022565	18810	plectin
Stk39	-1.322013252	1.27E-08	9.00E-08	795	874	678	206	308	402	3.411830107	3.534863421	3.438785484	2.159546634	2.170232445	2.089660177	Stk39	ENSMUSG00000027030	53416	serine/threonine kinase 39
Proser2	-1.319877867	2.57E-05	5.89E-05	295	304	283	94	85	171	1.984848765	2.014611519	2.180936584	1.033087675	0.324727937	0.862947656	Proser2	ENSMUSG00000045319	227545	proline and serine rich 2
Wdr8	-1.318213565	3.69E-10	5.76E-09	5037	4441	4246	1165	1869	2392	6.073746219	5.878622546	6.083944355	4.6553811	4.767690543	4.658600783	Wrap73	ENSMUSG00000029029	59002	WD repeat containing, antisense to Trp73
Nudt22	-1.317975986	7.32E-11	1.65E-09	4103	4355	3856	1066	1640	2162	5.777929871	5.850417569	5.944975578	4.527334074	4.579224789	4.512836197	Nudt22	ENSMUSG00000037349	68323	nudix (nucleoside diphosphate linked moiety X)-type motif 22
Gm4841	-1.316871554	0.003005658	0.004581721	117	144	147	19	67	103	0.658494422	0.942230926	1.240124162	-1.234591254	-0.014186317	0.139012421	Gm4841	ENSMUSG00000068606	225594	predicted gene 4841
Procr	-1.3157748	3.43E-11	9.58E-10	5821	5648	4798	1338	2121	3064	6.282407544	6.225403657	6.260238399	4.855024155	4.950079246	5.015621797	Procr	ENSMUSG00000027611	19124	protein C receptor, endothelial
Tet1	-1.315214465	8.70E-08	4.28E-07	1294	1138	842	268	461	552	4.113898544	3.915248726	3.750952449	2.538074187	2.750557565	2.545824572	Tet1	ENSMUSG00000047146	52463	tet methylcytosine dioxygenase 1
Col9a3	-1.313135294	1.07E-08	7.86E-08	915	911	743	240	320	445	3.614394545	3.594609411	3.570697148	2.379287008	2.225203319	2.235804897	Col9a3	ENSMUSG00000027570	12841	collagen, type IX, alpha 3
Ppp1r13l	-1.312010429	8.77E-08	4.30E-07	3620	3406	2644	915	1400	1413	5.597290226	5.495922206	5.400745121	4.307116873	4.351102697	3.899706695	Ppp1r13l	ENSMUSG00000040734	333654	protein phosphatase 1, regulatory (inhibitor) subunit 13 like
P2ry6	-1.310838782	0.000641396	0.001092625	76	89	87	21	37	40	0.043041535	0.254612531	0.489363616	-1.094799501	-0.854145463	-1.196553701	P2ry6	ENSMUSG00000048779	233571	pyrimidinergic receptor P2Y, G-protein coupled, 6
Pbx4	-1.307772824	3.23E-05	7.22E-05	184	225	135	48	65	98	1.306958242	1.582244092	1.11803805	0.073022654	-0.057271304	0.068170563	Pbx4	ENSMUSG00000031860	80720	pre B cell leukemia homeobox 4
Tfcp2l1	-1.307713277	5.69E-09	4.78E-08	1092	1063	936	254	417	573	3.86925262	3.816985559	3.903487934	2.460864068	2.606159342	2.599562872	Tfcp2l1	ENSMUSG00000026380	81879	transcription factor CP2-like 1
Smtnl2	-1.30609227	0.000119268	0.000235322	168	148	150	52	49	80	1.176502007	0.98147113	1.269097058	0.187001111	-0.457986214	-0.220221512	Smtnl2	ENSMUSG00000045667	276829	smoothelin-like 2
S1pr3	-1.301166996	2.88E-08	1.72E-07	836	835	765	232	316	412	3.484283792	3.469088885	3.612745104	2.330513169	2.207111427	2.124992197	S1pr3	ENSMUSG00000067586	13610	sphingosine-1-phosphate receptor 3
Ephx1	-1.300789813	3.59E-11	9.93E-10	8596	8563	7858	2127	3285	4709	6.844721049	6.825686691	6.971863336	5.523503486	5.580993161	5.635404989	Ephx1	ENSMUSG00000038776	13849	epoxide hydrolase 1, microsomal
Irf2bpl	-1.299543023	2.19E-11	6.93E-10	11620	11043	9300	2972	4204	5448	7.279547348	7.192590059	7.214906581	6.005990943	5.936768908	5.845655069	Irf2bpl	ENSMUSG00000034168	238330	interferon regulatory factor 2 binding protein-like
Usp44	-1.297636446	2.95E-05	6.65E-05	225	186	198	45	86	120	1.595667999	1.309055434	1.667573019	-0.018789082	0.341411556	0.356764641	Usp44	ENSMUSG00000020020	327799	ubiquitin specific peptidase 44
A930001C03Rik	-1.296465209	4.08E-07	1.56E-06	736	762	543	209	255	326	3.300735297	3.337280889	3.118921997	2.180339423	1.898744969	1.788458165	A930001C03Rik	ENSMUSG00000087132	319314	RIKEN cDNA A930001C03 gene
Tcirg1	-1.296296783	1.09E-10	2.29E-09	16615	15738	12601	4295	5711	7715	7.795383934	7.70366834	7.653106066	6.537116771	6.378661376	6.347489847	Tcirg1	ENSMUSG00000001750	27060	T cell, immune regulator 1, ATPase, H+ transporting, lysosomal V0 protein A3
Emx2os	-1.295548338	0.00160419	0.002552881	114	97	87	39	26	52	0.6213612	0.377375113	0.489363616	-0.222050665	-1.347576962	-0.828917457	Emx2os	ENSMUSG00000087095	329078	Emx2 opposite strand/antisense transcript (non-protein coding)
Llgl2	-1.292304469	1.13E-09	1.33E-08	2061	1982	1795	504	826	1018	4.78496507	4.715126835	4.842236115	3.44761248	3.590586899	3.427215233	Llgl2	ENSMUSG00000020782	217325	lethal giant larvae homolog 2 (Drosophila)
C1ra	-1.291247015	1.70E-07	7.47E-07	1415	1552	1382	321	629	870	4.242761805	4.362514493	4.465223281	2.79783204	3.198037602	3.200888893	C1ra	ENSMUSG00000055172	50909	complement component 1, r subcomponent A
Plcd4	-1.29056283	0.001829548	0.00288398	126	152	62	36	40	46	0.764482333	1.019672231	0.006488391	-0.335538148	-0.744450671	-1.001056717	Plcd4	ENSMUSG00000026173	18802	phospholipase C, delta 4
Rasa4	-1.290318878	4.81E-10	6.95E-09	4356	4179	3739	1191	1598	2078	5.864232987	5.790917562	5.900533403	4.687206813	4.541818905	4.455701599	Rasa4	ENSMUSG00000004952	54153	RAS p21 protein activator 4
Myzap	-1.289894958	5.36E-07	1.98E-06	406	435	402	117	154	227	2.44419793	2.530028081	2.685992122	1.346894387	1.174776492	1.268862381	Myzap	ENSMUSG00000041361	102371	myocardial zonula adherens protein
Dock4	-1.289369706	1.41E-05	3.45E-05	510	462	303	130	174	182	2.772447675	2.616698246	2.279154104	1.498091921	1.349890105	0.952208882	Dock4	ENSMUSG00000035954	238130	dedicator of cytokinesis 4
Ece1	-1.288814127	3.80E-12	1.93E-10	17328	16770	14188	4307	6617	8439	7.855998995	7.795292768	7.82422769	6.541141348	6.591061562	6.476874161	Ece1	ENSMUSG00000057530	230857	endothelin converting enzyme 1
Zfp365	-1.288217714	1.57E-12	1.12E-10	26137	25492	21303	6258	9821	13490	8.448957605	8.399423093	8.410582878	7.080091105	7.160684892	7.153534436	Zfp365	ENSMUSG00000037855	216049	zinc finger protein 365
Nanos1	-1.288133621	2.60E-12	1.52E-10	13406	13532	11440	3521	4876	7061	7.485798552	7.485807228	7.513665218	6.250492354	6.150658275	6.219719506	Nanos1	ENSMUSG00000072437	332397	nanos homolog 1 (Drosophila)
9930012K11Rik	-1.287869321	4.58E-08	2.51E-07	699	693	534	179	249	337	3.226432018	3.200547032	3.094849282	1.957553317	1.864525833	1.836141219	9930012K11Rik	ENSMUSG00000044551	268759	RIKEN cDNA 9930012K11 gene
Acad11	-1.285784557	7.36E-12	3.11E-10	6245	6275	5486	1621	2339	3327	6.38382423	6.377251671	6.453526348	5.131706551	5.091164721	5.134377306	Acad11	ENSMUSG00000090150	102632	acyl-Coenzyme A dehydrogenase family, member 11
Cited2	-1.282825322	1.81E-11	6.00E-10	8924	8912	7537	2364	3435	4359	6.898739529	6.883312526	6.911698511	5.67586884	5.645391202	5.524014559	Cited2	ENSMUSG00000039910	17684	Cbp/p300-interacting transactivator, with Glu/Asp-rich carboxy-terminal domain, 2
Morc4	-1.282235924	4.19E-10	6.29E-09	4538	4363	3549	1053	1583	2491	5.923271538	5.853064673	5.825311865	4.509643039	4.528221085	4.717076181	Morc4	ENSMUSG00000031434	75746	microrchidia 4
Insl6	-1.281821755	0.000422012	0.000743598	182	146	181	60	70	66	1.291281906	0.961984437	1.538667796	0.391050729	0.048120641	-0.492702495	Insl6	ENSMUSG00000050957	27356	insulin-like 6
Plin2	-1.280395603	1.10E-11	4.12E-10	19868	20507	17794	5059	7549	11270	8.053329195	8.085509728	8.150928995	6.773277567	6.781143596	6.894159945	Plin2	ENSMUSG00000028494	11520	perilipin 2
Creb5	-1.280325966	0.00033975	0.000611927	153	193	192	48	95	72	1.042460678	1.362053776	1.623380394	0.073022654	0.483469888	-0.369575593	Creb5	ENSMUSG00000053007	231991	cAMP responsive element binding protein 5
Prrx2	-1.279537872	1.51E-09	1.66E-08	2950	2823	2753	786	1173	1477	5.302111582	5.225166643	5.459008355	4.088044268	4.096073114	3.963555584	Prrx2	ENSMUSG00000039476	20204	paired related homeobox 2
Msh5	-1.278623856	2.66E-05	6.07E-05	220	251	157	53	74	129	1.563400553	1.739297635	1.334520106	0.214142289	0.127219629	0.459984808	Hspa1l	ENSMUSG00000007033	15482	heat shock protein 1-like
Serinc5	-1.274958608	2.35E-12	1.45E-10	8737	8661	7473	2263	3298	4548	6.86819068	6.842101931	6.899397098	5.612893273	5.586689502	5.585231109	Serinc5	ENSMUSG00000021703	218442	serine incorporator 5
Glrb	-1.274689532	2.24E-08	1.41E-07	1148	1088	955	273	398	657	3.941334026	3.850489121	3.932452902	2.564677541	2.539040989	2.796488924	Glrb	ENSMUSG00000028020	14658	glycine receptor, beta subunit
Osbp2	-1.27265213	0.00495099	0.007295195	63	84	101	21	22	66	-0.2235091	0.172218221	0.702607511	-1.094799501	-1.579137762	-0.492702495	Osbp2	ENSMUSG00000020435	74309	oxysterol binding protein 2
Btbd19	-1.272052971	4.45E-10	6.57E-09	3158	2888	2575	825	1121	1532	5.400373601	5.25799593	5.36260837	4.157852133	4.030711941	4.016254914	Btbd19	NA	78611	BTB (POZ) domain containing 19
Il20rb	-1.268915644	0.007989831	0.011404143	121	91	81	48	21	51	0.706563853	0.286296314	0.387350617	0.073022654	-1.643340287	-0.856218514	Il20rb	ENSMUSG00000044244	213208	interleukin 20 receptor beta
Hecw2	-1.268902872	0.000122361	0.000240789	245	298	222	48	131	154	1.717971351	1.985954595	1.831934987	0.073022654	0.943005184	0.713124478	Hecw2	ENSMUSG00000042807	329152	HECT, C2 and WW domain containing E3 ubiquitin protein ligase 2
Tap1	-1.267637096	2.12E-12	1.34E-10	20932	20363	17742	5242	8154	10786	8.128588787	8.075343931	8.146706998	6.824536143	6.892352187	6.830840096	Tap1	ENSMUSG00000037321	21354	transporter 1, ATP-binding cassette, sub-family B (MDR/TAP)
Lrrc51	-1.266416223	2.03E-08	1.30E-07	1004	1029	860	267	351	577	3.74816189	3.770134969	3.781437029	2.532694138	2.358215461	2.609575622	Lrrc51	ENSMUSG00000064307	69358	leucine rich repeat containing 51
Gm996	-1.265537971	0.000152196	0.000294019	140	151	120	45	44	76	0.915279053	1.010216367	0.949292287	-0.018789082	-0.610070431	-0.292966692	Gm996	ENSMUSG00000029419	381353	predicted gene 996
Arfgef3	-1.263906579	0.001181031	0.001923693	123	78	69	27	35	41	0.730010999	0.066700787	0.158746208	-0.741985034	-0.932201353	-1.162075355	Arfgef3	ENSMUSG00000019852	215821	ARFGEF family member 3
Sort1	-1.263716634	9.36E-07	3.21E-06	383	413	341	115	144	198	2.360288617	2.455343375	2.449137681	1.32215977	1.07854494	1.072915062	Sort1	ENSMUSG00000068747	20661	sortilin 1
Enc1	-1.263105434	8.95E-12	3.58E-10	16811	16559	13011	4229	6386	8253	7.812302111	7.777026805	7.69929648	6.514778642	6.539804522	6.444725931	Enc1	ENSMUSG00000041773	13803	ectodermal-neural cortex 1
Cav1	-1.258581541	2.02E-12	1.29E-10	22404	22346	19227	6012	8557	11624	8.226630147	8.209403676	8.262666441	7.022240651	6.961941199	6.938773793	Cav1	ENSMUSG00000007655	12389	caveolin 1, caveolae protein
Col4a6	-1.258332911	0.000840247	0.001401961	111	124	86	30	56	42	0.583246908	0.728220705	0.472854541	-0.59341205	-0.268862733	-1.128401796	Col4a6	ENSMUSG00000031273	94216	collagen, type IV, alpha 6
Abca1	-1.257626613	1.99E-08	1.28E-07	4656	4093	2995	1071	1658	1999	5.960297433	5.760926244	5.580522119	4.534080968	4.594963677	4.39982131	Abca1	ENSMUSG00000015243	11303	ATP-binding cassette, sub-family A (ABC1), member 1
Tnip3	-1.257394813	0.000173125	0.000329922	261	301	302	112	89	146	1.808857633	2.000354209	2.274398834	1.284244069	0.390335139	0.636847029	Tnip3	ENSMUSG00000044162	414084	TNFAIP3 interacting protein 3
Nudt18	-1.25734006	1.16E-07	5.44E-07	1143	1134	836	309	436	499	3.93504262	3.910173598	3.740646078	2.742979976	2.670293474	2.400568668	Nudt18	ENSMUSG00000045211	213484	nudix (nucleoside diphosphate linked moiety X)-type motif 18
Tchp	-1.254641822	3.05E-09	2.92E-08	2411	2253	1822	551	955	1176	5.011144346	4.899923373	4.863764647	3.5760809	3.799716141	3.635109858	Tchp	ENSMUSG00000002486	77832	trichoplein, keratin filament binding
Ypel2	-1.252645752	2.08E-08	1.33E-07	1780	1706	1428	418	617	1055	4.573615103	4.498913686	4.51243177	3.178077932	3.170291487	3.478653883	Ypel2	ENSMUSG00000018427	77864	yippee-like 2 (Drosophila)
Ddx19b	-1.252612597	2.56E-11	7.73E-10	6048	5706	4695	1464	2215	3141	6.337588788	6.240140532	6.228936262	4.984800673	5.0126132	5.051413919	Ddx19b	ENSMUSG00000033658	234733	DEAD (Asp-Glu-Ala-Asp) box polypeptide 19b
Kif21a	-1.251561209	3.84E-10	5.91E-09	4846	4656	3609	1129	1882	2414	6.01798788	5.946812956	5.849492427	4.610122551	4.777685407	4.671801678	Kif21a	ENSMUSG00000022629	16564	kinesin family member 21A
Cx3cl1	-1.250586243	5.42E-12	2.49E-10	15855	15499	13235	4257	6001	8041	7.727839938	7.681592777	7.723921157	6.524297698	6.450109024	6.407188421	Cx3cl1	ENSMUSG00000031778	20312	chemokine (C-X3-C motif) ligand 1
Plekhh1	-1.250585759	5.84E-09	4.89E-08	1186	1219	1011	329	470	595	3.988272669	4.014356071	4.014588943	2.833274695	2.778393282	2.65379243	Plekhh1	ENSMUSG00000060716	211945	pleckstrin homology domain containing, family H (with MyTH4 domain) member 1
Msl3l2	-1.245361057	0.000564994	0.000972938	124	121	105	43	46	49	0.741593201	0.693194184	0.758161957	-0.083412475	-0.547300154	-0.912421197	Msl3l2	ENSMUSG00000047669	73390	male-specific lethal 3-like 2 (Drosophila)
Mocos	-1.244795339	1.41E-08	9.77E-08	1077	1025	934	276	390	610	3.849317536	3.764521756	3.900404885	2.58040722	2.509818979	2.689631959	Mocos	ENSMUSG00000039616	68591	molybdenum cofactor sulfurase
Gap43	-1.24446579	1.28E-05	3.17E-05	206	201	187	56	76	114	1.469012335	1.420331214	1.585490118	0.292630423	0.165200119	0.283605755	Gap43	ENSMUSG00000047261	14432	growth associated protein 43
Khk	-1.243887965	0.0017423	0.002756049	176	185	169	83	47	88	1.243204191	1.301322771	1.440201917	0.854864294	-0.516910324	-0.084888986	Khk	ENSMUSG00000029162	16548	ketohexokinase
Inca1	-1.242794767	2.64E-06	7.89E-06	352	333	296	100	117	188	2.238870955	2.145620808	2.245533286	1.121754277	0.781221313	0.998665159	Inca1	ENSMUSG00000057054	103844	inhibitor of CDK, cyclin A1 interacting protein 1
Susd1	-1.240886987	0.000795269	0.001332884	90	92	91	24	46	42	0.283870934	0.301881035	0.553573205	-0.907633835	-0.547300154	-1.128401796	Susd1	ENSMUSG00000038578	634731	sushi domain containing 1
Bsn	-1.240718173	0.000386704	0.000687408	118	128	115	26	63	66	0.670662765	0.773637917	0.888352921	-0.795115714	-0.101682706	-0.492702495	Bsn	ENSMUSG00000032589	12217	bassoon
Ism2	-1.239263884	0.00293131	0.004482951	159	113	103	43	67	40	1.097580445	0.595406587	0.730652125	-0.083412475	-0.014186317	-1.196553701	Ism2	ENSMUSG00000050671	217738	isthmin 2
Dennd6b	-1.23709182	5.90E-07	2.14E-06	803	758	584	233	270	365	3.426256059	3.329698435	3.223772615	2.336700839	1.9809019	1.950848912	Dennd6b	ENSMUSG00000015377	69440	DENN/MADD domain containing 6B
Snord22	-1.236491055	5.01E-08	2.70E-07	3574	3748	2696	784	1542	1941	5.578845609	5.633923303	5.428834088	4.084371682	4.490386199	4.357371953	Snord22	ENSMUSG00000065087	100127111	small nucleolar RNA, C/D box 22
Rcor2	-1.235722974	2.66E-10	4.48E-09	2145	2198	1891	579	867	1155	4.842569115	4.864284615	4.91736538	3.647508865	3.660396697	3.609144626	Rcor2	ENSMUSG00000024968	104383	REST corepressor 2
Fos	-1.235153955	3.96E-09	3.58E-08	6866	7526	6394	2169	2782	3570	6.520570329	6.639478538	6.674457277	5.551704882	5.341299582	5.236039816	Fos	ENSMUSG00000021250	14281	FBJ osteosarcoma oncogene
Prr5	-1.232825211	0.000164937	0.000315648	180	189	128	56	69	72	1.275433357	1.332007813	1.041738488	0.292630423	0.027649194	-0.369575593	Prr5	ENSMUSG00000036106	109270	proline rich 5 (renal)
Dynlt1b	-1.232635908	0.000458629	0.000802981	322	223	313	110	110	120	2.110760483	1.569424155	2.325864129	1.258401776	0.692974626	0.356764641	Dynlt1b	ENSMUSG00000096255	21648	dynein light chain Tctex-type 1B
Cdc20	-1.225376363	6.67E-12	2.89E-10	14531	14462	12862	3794	5826	8139	7.602044856	7.581691878	7.682680767	6.358207445	6.407418833	6.424662133	Cdc20	ENSMUSG00000006398	107995	cell division cycle 20
Aph1c	-1.224975952	0.000512659	0.000889586	102	99	100	26	36	69	0.462462302	0.40650027	0.688378084	-0.795115714	-0.892645578	-0.429825908	Aph1c	ENSMUSG00000053040	68318	aph1 homolog C, gamma secretase subunit
Dyrk2	-1.22479791	7.86E-11	1.74E-09	3035	2988	2466	803	1174	1579	5.343078603	5.30708742	5.300230744	4.118889443	4.097301488	4.059812106	Dyrk2	ENSMUSG00000028630	69181	dual-specificity tyrosine-(Y)-phosphorylation regulated kinase 2
P4ha3	-1.223669307	6.32E-07	2.28E-06	659	657	636	208	268	328	3.141550869	3.123707143	3.346651722	2.173441737	1.97021422	1.797245856	P4ha3	ENSMUSG00000051048	320452	procollagen-proline, 2-oxoglutarate 4-dioxygenase (proline 4-hydroxylase), alpha polypeptide III
Cnbd2	-1.223656383	3.38E-07	1.33E-06	600	724	475	165	247	336	3.006463148	3.263585964	2.926234839	1.840507186	1.852936681	1.831870935	Cnbd2	ENSMUSG00000038085	70873	cyclic nucleotide binding domain containing 2
Gdpd5	-1.22344481	2.53E-09	2.49E-08	2907	3208	2655	881	1231	1524	5.280935379	5.40954593	5.406732796	4.252527085	4.165644424	4.008708165	Gdpd5	ENSMUSG00000035314	233552	glycerophosphodiester phosphodiesterase domain containing 5
Tmem120a	-1.223358177	7.44E-11	1.67E-09	5957	5889	4954	1602	2424	2990	6.315720477	6.285675037	6.306390694	5.114703537	5.142641485	4.980366657	Tmem120a	ENSMUSG00000039886	215210	transmembrane protein 120A
Tmem95	-1.222904572	0.000149631	0.000289504	131	143	96	33	49	72	0.820165082	0.932251811	0.630013959	-0.458721058	-0.457986214	-0.369575593	Tmem95	ENSMUSG00000094845	100503361	transmembrane protein 95
Lrrc29	-1.222707234	0.000325995	0.000589583	232	233	175	83	89	84	1.639663286	1.632414137	1.490274747	0.854864294	0.390335139	-0.150968966	Lrrc29	ENSMUSG00000041679	234684	leucine rich repeat containing 29
Dagla	-1.221593725	2.99E-08	1.77E-07	1269	1063	944	315	455	594	4.085776303	3.816985559	3.915754663	2.77066668	2.731697498	2.651371173	Dagla	ENSMUSG00000035735	269060	diacylglycerol lipase, alpha
Igfbp6	-1.219617908	0.001159131	0.001889722	100	83	129	29	42	57	0.434190455	0.155159247	1.052888607	-0.641256261	-0.675696506	-0.699662648	Igfbp6	ENSMUSG00000023046	16012	insulin-like growth factor binding protein 6
Il17rd	-1.219127831	3.80E-08	2.15E-07	978	1114	932	307	404	550	3.710349519	3.884526653	3.897315234	2.733631727	2.560575505	2.54060068	Il17rd	ENSMUSG00000040717	171463	interleukin 17 receptor D
Fuca1	-1.218041752	5.12E-12	2.38E-10	8713	8856	7700	2359	3501	4861	6.864222716	6.874219613	6.942562963	5.672815072	5.672840449	5.681224515	Fuca1	ENSMUSG00000028673	71665	fucosidase, alpha-L- 1, tissue
Sh3rf3	-1.217914193	8.60E-09	6.56E-08	1235	1180	932	324	442	639	4.046628488	3.9674867	3.897315234	2.81122528	2.689968024	2.756494539	Sh3rf3	ENSMUSG00000037990	237353	SH3 domain containing ring finger 3
Slc26a2	-1.217910828	5.53E-09	4.67E-08	3411	3445	2842	795	1473	1926	5.51152121	5.512342615	5.504895716	4.10445618	4.424383555	4.346187321	Slc26a2	ENSMUSG00000034320	13521	solute carrier family 26 (sulfate transporter), member 2
Cgref1	-1.217838993	7.26E-11	1.65E-09	7541	7697	6975	1995	3131	4381	6.655836349	6.671886932	6.799915044	5.431101665	5.511744347	5.531275335	Cgref1	ENSMUSG00000029161	68567	cell growth regulator with EF hand domain 1
Pisd-ps1	-1.217367048	3.32E-06	9.66E-06	1574	1489	904	421	475	715	4.396285988	4.302771823	3.853350631	3.188379095	2.793628609	2.918299594	Pisd-ps1	NA	236604	phosphatidylserine decarboxylase, pseudogene 1
Rab32	-1.217362727	6.82E-10	9.05E-09	2414	2302	2037	669	914	1251	5.012937582	4.930949288	5.024613409	3.855731804	3.736475556	3.724204738	Rab32	ENSMUSG00000019832	67844	RAB32, member RAS oncogene family
Tnfrsf10b	-1.216161905	6.26E-11	1.50E-09	12394	12388	10106	3267	5172	6230	7.372570918	7.358385987	7.334805048	6.1424945	6.235665922	6.039115815	Tnfrsf10b	ENSMUSG00000022074	21933	tumor necrosis factor receptor superfamily, member 10b
Srl	-1.216143833	1.12E-08	8.13E-08	1473	1334	1159	358	597	721	4.300674577	4.144307329	4.211524659	2.954913846	3.122828159	2.930333061	Srl	ENSMUSG00000022519	106393	sarcalumenin
Map3k12	-1.214693712	1.19E-10	2.42E-09	5541	5738	5150	1608	2218	3123	6.211300192	6.248207242	6.362359407	5.12009459	5.014565009	5.043126106	Map3k12	ENSMUSG00000023050	26404	mitogen-activated protein kinase kinase kinase 12
Stap2	-1.214499392	2.44E-06	7.37E-06	479	415	378	115	205	215	2.682170101	2.462294929	2.597384951	1.32215977	1.585210899	1.190981135	Stap2	ENSMUSG00000038781	106766	signal transducing adaptor family member 2
Btg1	-1.213434672	1.48E-12	1.10E-10	40549	39088	32846	10445	15611	21789	9.082509548	9.016083194	9.035222799	7.819069344	7.82925291	7.845189271	Btg1	ENSMUSG00000036478	12226	B cell translocation gene 1, anti-proliferative
Casp6	-1.211705089	4.86E-10	6.99E-09	2315	2261	2053	627	942	1244	4.952551231	4.905034624	5.035896152	3.762285814	3.779962768	3.716118156	Casp6	ENSMUSG00000027997	12368	caspase 6
Ptprf	-1.208599026	4.31E-10	6.40E-09	7786	7512	6234	2122	3153	3755	6.701956451	6.636792695	6.637901835	5.520109158	5.521842876	5.30890187	Ptprf	ENSMUSG00000033295	19268	protein tyrosine phosphatase, receptor type, F
Fbxw9	-1.208572637	5.03E-09	4.34E-08	3148	3407	2719	982	1193	1714	5.395799512	5.496345585	5.44108572	4.40899755	4.120444062	4.178071295	Fbxw9	ENSMUSG00000008167	68628	F-box and WD-40 domain protein 9
Bbs2	-1.204929482	1.74E-08	1.16E-07	976	1083	903	292	415	545	3.707399408	3.843850364	3.851755416	2.661519643	2.599239508	2.527457591	Bbs2	ENSMUSG00000031755	67378	Bardet-Biedl syndrome 2 (human)
Gm3230	-1.203410872	0.02176727	0.029051168	110	77	76	16	23	115	0.570315048	0.048339103	0.296458109	-1.473508754	-1.517671049	0.296059445	Gm3230	NA	100041244	predicted gene 3230
A430105I19Rik	-1.202647138	8.57E-11	1.87E-09	5922	6070	4827	1689	2247	3189	6.307220529	6.329341051	6.268930462	5.190968264	5.033297589	5.073284775	A430105I19Rik	ENSMUSG00000045838	214239	RIKEN cDNA A430105I19 gene
2700054A10Rik	-1.20246638	0.00267302	0.004116763	108	64	73	19	42	42	0.544098293	-0.214429169	0.23904046	-1.234591254	-0.675696506	-1.128401796	2700054A10Rik	ENSMUSG00000038347	72578	RIKEN cDNA 2700054A10 gene
Hrsp12	-1.202249393	4.20E-10	6.30E-09	2484	2511	2104	634	1006	1435	5.054159201	5.056267588	5.071282093	3.778286544	3.874699234	3.921974925	Rida	ENSMUSG00000022323	15473	reactive intermediate imine deaminase A homolog
Mgat3	-1.201207627	1.86E-08	1.21E-07	1527	1750	1343	476	646	815	4.35258045	4.535628182	4.423951901	3.365260761	3.236453008	3.106823883	Mgat3	ENSMUSG00000042428	17309	mannoside acetylglucosaminyltransferase 3
Zfyve21	-1.198766104	1.58E-09	1.72E-08	2010	2103	1861	546	886	1142	4.74883492	4.800573849	4.894305	3.562945261	3.691636659	3.592833535	Zfyve21	ENSMUSG00000021286	68520	zinc finger, FYVE domain containing 21
Sik1	-1.198604839	4.49E-10	6.60E-09	4738	4583	3925	1337	1898	2362	5.985478879	5.924019473	5.970557335	4.853946034	4.789892476	4.64040266	Sik1	ENSMUSG00000024042	17691	salt inducible kinase 1
Cul7	-1.197958325	6.58E-12	2.88E-10	11891	11407	9541	3177	4636	6191	7.312804321	7.239372853	7.251812866	6.10220135	6.077855642	6.030058073	Cul7	ENSMUSG00000038545	66515	cullin 7
Calr3	-1.197886856	0.000247118	0.000457109	247	265	210	75	69	184	1.729650223	1.817278454	1.752093397	0.709851198	0.027649194	0.967861113	Calr3	ENSMUSG00000019732	73316	calreticulin 3
Il18	-1.197223326	1.97E-05	4.62E-05	217	192	169	55	77	115	1.543687891	1.354600745	1.440201917	0.266939256	0.183821874	0.296059445	Il18	ENSMUSG00000039217	16173	interleukin 18
Oplah	-1.196570976	2.13E-10	3.76E-09	3924	3673	3368	1027	1600	2086	5.713592789	5.604769669	5.749810844	4.47359655	4.543622302	4.461241523	Oplah	ENSMUSG00000022562	75475	5-oxoprolinase (ATP-hydrolysing)
Klrg2	-1.196228347	4.63E-08	2.53E-07	1123	1072	1043	321	419	658	3.909598996	3.829136666	4.059506218	2.79783204	2.613046143	2.798678656	Klrg2	ENSMUSG00000071537	74253	killer cell lectin-like receptor subfamily G, member 2
Tef	-1.194887999	1.29E-11	4.66E-10	21248	20727	18256	5471	8817	11821	8.150204586	8.100903792	8.18790701	6.88621578	7.005119123	6.963016488	Tef	ENSMUSG00000022389	21685	thyrotroph embryonic factor
Erbb3	-1.19433932	8.65E-08	4.25E-07	709	650	615	183	284	385	3.24689432	3.1082788	3.298280125	1.989322092	2.053577582	2.027535611	Erbb3	ENSMUSG00000018166	13867	erb-b2 receptor tyrosine kinase 3
Cgn	-1.193803655	2.83E-08	1.69E-07	1063	1194	861	304	410	621	3.830459602	3.984487323	3.783111877	2.719494788	2.581793307	2.71535974	Cgn	ENSMUSG00000068876	70737	cingulin
Tmem14a	-1.192949214	6.45E-06	1.73E-05	525	556	484	117	261	327	2.814182189	2.883325515	2.95326426	1.346894387	1.932171235	1.792858701	Tmem14a	ENSMUSG00000025933	75712	transmembrane protein 14A
Zc3h12a	-1.192818276	2.26E-06	6.87E-06	543	519	431	131	254	258	2.862720411	2.784173081	2.786270289	1.509091749	1.893097847	1.452519358	Zc3h12a	ENSMUSG00000042677	230738	zinc finger CCCH type containing 12A
A3galt2	-1.192156146	0.015681256	0.021403343	88	80	28	20	20	33	0.251831812	0.102737597	-1.115800316	-1.163002877	-1.71053355	-1.464162917	Phc2	ENSMUSG00000028796	54383	polyhomeotic-like 2 (Drosophila)
Mapkapk3	-1.191853855	2.07E-11	6.65E-10	4737	4775	4124	1288	1926	2682	5.985174421	5.983214354	6.04189325	4.80010611	4.811009421	4.823604929	Mapkapk3	ENSMUSG00000032577	102626	mitogen-activated protein kinase-activated protein kinase 3
Ampd2	-1.190964438	1.14E-10	2.36E-09	17368	17198	14301	4836	7236	8728	7.859325274	7.831648584	7.835671771	6.708248208	6.720058514	6.525445594	Ampd2	ENSMUSG00000027889	109674	adenosine monophosphate deaminase 2
Amacr	-1.189978451	6.22E-08	3.22E-07	1211	1191	1026	285	529	701	4.018340878	3.980861159	4.035818147	2.626592713	2.948667206	2.889824914	Amacr	ENSMUSG00000022244	17117	alpha-methylacyl-CoA racemase
Ager	-1.189610631	0.003317971	0.005020948	136	119	56	35	35	51	0.87377831	0.669361628	-0.138169698	-0.375441787	-0.932201353	-0.856218514	Ager	ENSMUSG00000015452	11596	advanced glycosylation end product-specific receptor
Psd3	-1.189413886	2.41E-07	1.01E-06	1687	1556	1176	486	602	755	4.496245259	4.366225436	4.232516169	3.395214598	3.134841182	2.996689424	Psmd3	ENSMUSG00000017221	22123	proteasome (prosome, macropain) 26S subunit, non-ATPase, 3
2810021J22Rik	-1.186721962	1.87E-07	8.14E-07	1025	1301	919	333	416	636	3.777995297	4.108199008	3.877069587	2.850674762	2.602703574	2.749719672	2810021J22Rik	ENSMUSG00000020491	69944	RIKEN cDNA 2810021J22 gene
Mus81	-1.186586085	6.85E-11	1.60E-09	3090	3181	2660	853	1256	1759	5.368979942	5.397356251	5.409446273	4.205966084	4.194627407	4.215430718	Mus81	ENSMUSG00000024906	71711	MUS81 structure-specific endonuclease subunit
Sdhaf4	-1.178131772	9.43E-09	7.06E-08	1065	1158	978	301	467	628	3.833168731	3.940359971	3.966755082	2.705217949	2.769174255	2.731496264	Sdhaf4	ENSMUSG00000026154	68002	succinate dehydrogenase complex assembly factor 4
Nudt8	-1.177138119	5.43E-10	7.55E-09	2578	2435	2202	715	1028	1382	5.107723809	5.011946547	5.136934741	3.9515778	3.905879308	3.867733631	Nudt8	ENSMUSG00000024869	66387	nudix (nucleoside diphosphate linked moiety X)-type motif 8
Zfp219	-1.176835506	1.19E-10	2.42E-09	7493	6750	5865	1993	2768	3958	6.646625252	6.482506373	6.549887729	5.429655105	5.334023661	5.38483407	Zfp219	ENSMUSG00000049295	69890	zinc finger protein 219
Lxn	-1.176446314	9.84E-11	2.10E-09	7148	7055	6475	2021	2840	4191	6.578631303	6.546255049	6.692616217	5.449776132	5.371057773	5.467329723	Lxn	ENSMUSG00000047557	17035	latexin
Nlrc3	-1.175889046	0.001728913	0.002736239	111	85	58	21	36	51	0.583246908	0.189077839	-0.088321203	-1.094799501	-0.892645578	-0.856218514	Nlrc3	ENSMUSG00000049871	268857	NLR family, CARD domain containing 3
Ccdc163	-1.175832349	8.16E-06	2.13E-05	646	480	359	141	211	274	3.112853282	2.67171455	2.523161692	1.614709586	1.62663584	1.53888705	Ccdc163	ENSMUSG00000028689	68394	coiled-coil domain containing 163
Vax2	-1.175576266	0.000350782	0.000629559	180	205	160	73	59	99	1.275433357	1.448610275	1.361675143	0.671200151	-0.194830132	0.082619958	Vax2	ENSMUSG00000034777	24113	ventral anterior homeobox 2
Nat6	-1.174425639	1.24E-08	8.80E-08	3750	3869	3183	1199	1405	2027	5.648176456	5.679750177	5.668327988	4.696859754	4.356242428	4.419875522	Nat6	ENSMUSG00000079334	56441	N-acetyltransferase 6
AI839979	-1.174366864	0.002174246	0.003388967	76	116	73	23	30	66	0.043041535	0.632857938	0.23904046	-0.967364529	-1.148093636	-0.492702495	AI839979	NA	100740	expressed sequence AI839979
Kif26b	-1.172061504	1.82E-05	4.33E-05	213	266	183	63	94	128	1.516978224	1.822690488	1.554444686	0.460695999	0.468358994	0.448873894	Kif26b	ENSMUSG00000026494	269152	kinesin family member 26B
Phactr1	-1.171721325	0.00040095	0.000709843	109	139	131	41	46	76	0.557266221	0.89163043	1.074933602	-0.151066877	-0.547300154	-0.292966692	Phactr1	ENSMUSG00000054728	218194	phosphatase and actin regulator 1
Rdh5	-1.171267524	0.001290594	0.002089258	202	106	166	50	55	94	1.440869812	0.504043144	1.414498333	0.131137182	-0.29440926	0.008880794	Rdh5	ENSMUSG00000025350	19682	retinol dehydrogenase 5
Hyi	-1.171159794	2.60E-05	5.95E-05	358	394	332	90	137	280	2.263182379	2.38757733	2.410650869	0.970796747	1.007147541	1.569986908	Hyi	ENSMUSG00000006395	68180	hydroxypyruvate isomerase (putative)
Plch1	-1.170160778	0.000186346	0.000352834	154	135	131	40	51	97	1.051794794	0.84983207	1.074933602	-0.186122245	-0.401374606	0.053574984	Plch1	ENSMUSG00000036834	269437	phospholipase C, eta 1
Kcnn3	-1.170120171	0.003090642	0.004702215	107	100	105	48	35	48	0.53080907	0.420845284	0.758161957	0.073022654	-0.932201353	-0.941365503	Kcnn3	ENSMUSG00000000794	140493	potassium intermediate/small conductance calcium-activated channel, subfamily N, member 3
2900060B14Rik	-1.170054809	3.50E-05	7.78E-05	264	312	262	64	138	180	1.825279315	2.051956229	2.070063392	0.483183478	1.017566059	0.936384971	2900060B14Rik	ENSMUSG00000107722	68204	RIKEN cDNA 2900060B14 gene
Gatsl3	-1.16961314	4.17E-09	3.74E-08	1592	1635	1428	425	709	920	4.412679784	4.437626018	4.51243177	3.202000553	3.370511324	3.281386274	Gatsl3	ENSMUSG00000020424	71962	GATS protein-like 3
Avpi1	-1.169116919	7.54E-11	1.68E-09	7161	6885	6386	1937	2980	4080	6.581252347	6.511071033	6.672651337	5.388551089	5.44045592	5.42861695	Avpi1	ENSMUSG00000018821	69534	arginine vasopressin-induced 1
1810044D09Rik	-1.169014741	5.40E-05	0.000114999	167	178	158	54	67	95	1.167943145	1.246001573	1.343628695	0.240782279	-0.014186317	0.023933228	1810044D09Rik	ENSMUSG00000100680	69798	RIKEN cDNA 1810044D09 gene
Gstm1	-1.16813272	5.29E-07	1.96E-06	1160	1385	1050	386	550	594	3.956322395	4.198391981	4.069148198	3.063363453	3.004729789	2.651371173	Gstm1	ENSMUSG00000058135	14862	glutathione S-transferase, mu 1
Scrn3	-1.167670655	7.96E-09	6.20E-08	1827	2055	1833	538	817	1173	4.611192364	4.767280561	4.872444252	3.541676257	3.574799928	3.631429028	Scrn3	ENSMUSG00000008226	74616	secernin 3
Peli3	-1.167007661	1.15E-06	3.83E-06	985	925	873	287	458	453	3.720627657	3.616586058	3.803059839	2.636658415	2.74115835	2.261433806	Peli3	ENSMUSG00000024901	240518	pellino 3
Tmem150a	-1.166587543	1.08E-09	1.28E-08	2392	2487	2109	648	980	1484	4.999735131	5.042418008	5.074705039	3.80976526	3.836959632	3.970370656	Tmem150a	ENSMUSG00000055912	232086	transmembrane protein 150A
Gss	-1.165851377	1.43E-11	5.02E-10	14220	14548	12894	4123	5881	8287	7.570834636	7.590244995	7.686265414	6.478162302	6.420972365	6.450656248	Gss	ENSMUSG00000027610	14854	glutathione synthetase
Shisa4	-1.165265354	4.15E-10	6.25E-09	5758	5419	4874	1514	2487	3045	6.266711195	6.165701785	6.282907325	5.033228959	5.179643604	5.006651679	Shisa4	ENSMUSG00000041889	77552	shisa family member 4
Laptm4b	-1.162971281	6.57E-12	2.88E-10	7292	7392	6228	2016	2991	4218	6.607401998	6.613563731	6.636512822	5.446203611	5.445769765	5.476591332	Laptm4b	ENSMUSG00000022257	114128	lysosomal-associated protein transmembrane 4B
Creb3l4	-1.162501038	0.002027904	0.003174928	70	129	86	30	37	51	-0.073899737	0.784772282	0.472854541	-0.59341205	-0.854145463	-0.856218514	Creb3l4	ENSMUSG00000027938	78284	cAMP responsive element binding protein 3-like 4
Trim11	-1.162264011	1.24E-10	2.52E-09	10078	9206	7881	2779	3830	5213	7.074166813	6.930132195	6.976079393	5.909144799	5.802383286	5.782058283	Trim11	ENSMUSG00000020455	94091	tripartite motif-containing 11
Izumo4	-1.161598797	1.65E-06	5.24E-06	590	570	439	165	252	268	2.982258807	2.91913436	2.812749245	1.840507186	1.881736854	1.507101982	Izumo4	ENSMUSG00000055862	71564	IZUMO family member 4
Ahnak	-1.160986755	5.00E-10	7.13E-09	201586	182755	143997	51711	74550	104743	11.39613657	11.24116529	11.16744182	10.12665567	10.08482709	10.11030066	Ahnak	ENSMUSG00000069833	66395	AHNAK nucleoprotein (desmoyokin)
Tmem132a	-1.159475648	4.12E-11	1.10E-09	26206	25472	23569	7229	11241	14781	8.452761054	8.398290816	8.556411026	7.288165202	7.355495353	7.285375398	Tmem132a	ENSMUSG00000024736	98170	transmembrane protein 132A
Iqcg	-1.158444499	0.000100895	0.000202349	335	328	301	70	187	191	2.167676831	2.123865016	2.269627839	0.611209824	1.453282264	1.021344102	Iqcg	ENSMUSG00000035578	69707	IQ motif containing G
Gm38426	-1.158235017	0.000896024	0.001488751	154	126	119	55	48	65	1.051794794	0.751108025	0.937308601	0.266939256	-0.48714746	-0.514285428	Gm38426	ENSMUSG00000003812	100503676	predicted gene, 38426
Siva1	-1.154969245	2.46E-11	7.52E-10	12134	11952	10773	3322	5040	7190	7.34198691	7.306699306	7.427005165	6.166575318	6.1983745	6.245833829	Siva1	ENSMUSG00000064326	30954	SIVA1, apoptosis-inducing factor
Oas1f	-1.154303427	0.003669405	0.005508021	86	86	73	36	29	38	0.21906498	0.205742705	0.23904046	-0.335538148	-1.195438616	-1.268085372	Oas1f	ENSMUSG00000053765	243262	2'-5' oligoadenylate synthetase 1F
Dusp10	-1.153676057	6.19E-08	3.21E-07	1099	1099	887	320	396	651	3.878462221	3.864987737	3.825989126	2.793339853	2.531790789	2.783280272	Dusp10	ENSMUSG00000039384	63953	dual specificity phosphatase 10
Tmem53	-1.15213041	6.16E-08	3.20E-07	1231	1123	987	355	495	600	4.041952236	3.896124232	3.979958754	2.942795608	2.853010247	2.665838137	Tmem53	ENSMUSG00000048772	68777	transmembrane protein 53
Klhdc1	-1.151853104	2.65E-08	1.61E-07	866	880	754	254	364	480	3.535084462	3.544721615	3.591874309	2.460864068	2.410540188	2.344716818	Klhdc1	ENSMUSG00000051890	271005	kelch domain containing 1
Tmem2	-1.149999072	2.72E-11	8.09E-10	6517	6243	5328	1733	2603	3740	6.445320415	6.369876941	6.411372739	5.228056352	5.245387221	5.303129305	Tmem2	ENSMUSG00000024754	83921	transmembrane protein 2
Ikzf2	-1.149471166	9.67E-05	0.000194841	321	288	234	101	90	183	2.106287867	1.936890624	1.907588737	1.136016364	0.406281139	0.960056224	Ikzf2	ENSMUSG00000025997	22779	IKAROS family zinc finger 2
Il34	-1.149451156	2.77E-07	1.13E-06	594	632	505	158	275	338	2.991989327	3.067831294	3.01443061	1.778219108	2.007279755	1.8403989	Il34	ENSMUSG00000031750	76527	interleukin 34
Wbscr27	-1.148395288	2.03E-07	8.72E-07	604	689	581	177	270	393	3.016032315	3.192208599	3.216353731	1.941402683	1.9809019	2.057104196	Wbscr27	ENSMUSG00000040557	79565	Williams Beuren syndrome chromosome region 27 (human)
Snora74a	-1.14804377	1.28E-06	4.19E-06	19322	23150	19235	4774	10283	13702	8.013129156	8.260396858	8.263266567	6.689635074	7.226997846	7.176028352	Snora74a	ENSMUSG00000065649	436583	small nucleolar RNA, H/ACA box 74A
Myo1b	-1.147686836	4.74E-10	6.88E-09	2136	2089	1761	577	882	1206	4.836506122	4.790942417	4.814660968	3.642522501	3.685115806	3.671410691	Myo1b	ENSMUSG00000018417	17912	myosin IB
Kitl	-1.147532575	4.83E-11	1.24E-09	4110	4254	3552	1141	1756	2424	5.780388475	5.816573313	5.826530567	4.625367035	4.677765209	4.677762385	Kitl	ENSMUSG00000019966	17311	kit ligand
Grtp1	-1.147314004	1.11E-05	2.80E-05	285	257	221	83	106	142	1.935277307	1.773235382	1.825447716	0.854864294	0.640013455	0.597140644	Grtp1	ENSMUSG00000038515	66790	GH regulated TBC protein 1
Ninj1	-1.147103587	2.46E-10	4.23E-09	8266	8180	7658	2445	3562	4656	6.788252045	6.759679665	6.934673091	5.724459995	5.697754027	5.619080016	Ninj1	ENSMUSG00000037966	18081	ninjurin 1
Pigf	-1.146300032	2.79E-10	4.63E-09	6355	6631	5813	1811	2624	4043	6.409010538	6.456849437	6.537041486	5.291547704	5.256975307	5.415478354	Pigf	ENSMUSG00000024145	18701	phosphatidylinositol glycan anchor biosynthesis, class F
Cux2	-1.145942441	0.008549891	0.01215833	89	55	105	17	42	54	0.267940311	-0.429185478	0.758161957	-1.389396011	-0.675696506	-0.775818015	Cux2	ENSMUSG00000042589	13048	cut-like homeobox 2
Cenpe	-1.145299171	2.88E-11	8.43E-10	17136	17760	13347	4772	6843	9780	7.839925222	7.878036521	7.736077654	6.689030633	6.639506213	6.689605038	Cenpe	ENSMUSG00000045328	229841	centromere protein E
5730408K05Rik	-1.143675596	2.25E-10	3.91E-09	5140	5254	4574	1385	2224	3162	6.102943753	6.121100299	6.191274695	4.904807995	5.018460722	5.061023241	5730408K05Rik	NA	67531	RIKEN cDNA 5730408K05 gene
Gnat2	-1.140802762	2.48E-05	5.71E-05	304	311	194	85	109	155	2.028051911	2.047340664	1.638262189	0.888949271	0.679915484	0.722381723	Gnat2	ENSMUSG00000009108	14686	guanine nucleotide binding protein, alpha transducing 2
Zfp69	-1.140800761	2.82E-05	6.40E-05	407	346	235	90	130	222	2.447737749	2.200696717	1.91371773	0.970796747	0.932031955	1.236921209	Zfp84	ENSMUSG00000046185	74352	zinc finger protein 84
Xrra1	-1.138415669	0.004568021	0.006756831	105	82	50	17	37	52	0.50385765	0.137896145	-0.298965719	-1.389396011	-0.854145463	-0.828917457	Xrra1	ENSMUSG00000035211	446101	X-ray radiation resistance associated 1
Svil	-1.138223483	2.26E-10	3.93E-09	3270	3136	2526	886	1299	1794	5.450636454	5.376808413	5.334900234	4.260685699	4.243155341	4.243833612	Svil	ENSMUSG00000024236	225115	supervillin
Nudt14	-1.138175351	1.08E-07	5.09E-07	1368	1234	1297	362	601	801	4.194065157	4.031984931	4.373704921	2.970914763	3.132446567	3.081867626	Nudt14	ENSMUSG00000002804	66174	nudix (nucleoside diphosphate linked moiety X)-type motif 14
Cubn	-1.13652891	0.000243099	0.000450265	477	463	309	163	192	173	2.676147093	2.619810374	2.3073612	1.822983306	1.491155478	0.879593153	Cubn	ENSMUSG00000026726	65969	cubilin (intrinsic factor-cobalamin receptor)
Bcl2l11	-1.133867943	5.21E-10	7.35E-09	3550	3433	2665	957	1446	1888	5.569127897	5.507310058	5.412154656	4.371818639	4.397711491	4.317458654	Bcl2l11	ENSMUSG00000027381	12125	BCL2-like 11 (apoptosis facilitator)
Syt11	-1.133595583	5.55E-09	4.69E-08	1901	2130	1831	565	845	1249	4.668441635	4.818969111	4.870870021	3.612236888	3.623358224	3.721898907	Syt11	ENSMUSG00000068923	229521	synaptotagmin XI
2310067B10Rik	-1.132860091	9.38E-10	1.14E-08	5703	5306	4518	1643	2310	2905	6.252867004	6.13530589	6.173506074	5.151147116	5.073173256	4.938778323	Tmem94	ENSMUSG00000020747	71947	transmembrane protein 94
Rbm43	-1.132686074	3.03E-10	4.94E-09	7926	8343	7214	2167	3562	4987	6.727663599	6.788141373	6.84851516	5.550374385	5.697754027	5.718133497	Rbm43	ENSMUSG00000036249	71684	RNA binding motif protein 43
Poll	-1.132294534	1.95E-10	3.55E-09	4542	4546	4159	1290	1978	2717	5.924542338	5.912327617	6.054082986	4.802343442	4.84942496	4.842300939	Poll	ENSMUSG00000025218	56626	polymerase (DNA directed), lambda
4931406H21Rik	-1.132185396	0.013776993	0.01898833	176	106	52	40	30	63	1.243204191	0.504043144	-0.243351812	-0.186122245	-1.148093636	-0.558444785	4931406H21Rik	NA	77592	RIKEN cDNA 4931406H21 gene
A930005H10Rik	-1.128847385	2.19E-05	5.11E-05	270	295	236	79	100	191	1.85757233	1.971409807	1.919820795	0.784178986	0.55673769	1.021344102	A930005H10Rik	ENSMUSG00000054426	68161	RIKEN cDNA A930005H10 gene
Fosl1	-1.128844418	2.06E-10	3.67E-09	10000	9913	7950	2939	4143	5265	7.062958638	7.036867502	6.98865414	5.989885766	5.915686982	5.796374278	Fosl1	ENSMUSG00000024912	14283	fos-like antigen 1
Psmb9	-1.126789169	1.57E-07	7.04E-07	1018	889	877	281	438	525	3.768119217	3.559383739	3.809648335	2.606248141	2.676881515	2.473654129	Psmb9	ENSMUSG00000096727	16912	proteasome (prosome, macropain) subunit, beta type 9 (large multifunctional peptidase 2)
Ypel3	-1.125723605	5.85E-09	4.89E-08	2762	2543	2330	783	1198	1427	5.207145287	5.074529274	5.218418244	4.082531878	4.126473012	3.913917099	Ypel3	ENSMUSG00000042675	66090	yippee-like 3 (Drosophila)
Cish	-1.125707939	9.08E-05	0.000183998	339	400	288	115	181	152	2.184747211	2.409322978	2.20612491	1.32215977	1.406481653	0.694429858	Cish	ENSMUSG00000032578	12700	cytokine inducible SH2-containing protein
Mmp11	-1.124577455	7.46E-11	1.67E-09	5449	5230	4661	1511	2341	3081	6.187149984	6.114496396	6.218452609	5.030368656	5.092397281	5.023600688	Mmp11	ENSMUSG00000000901	17385	matrix metallopeptidase 11
Tmod1	-1.124279011	0.001696084	0.002687977	95	122	131	26	56	83	0.3609876	0.704964432	1.074933602	-0.795115714	-0.268862733	-0.167972952	Tmod1	ENSMUSG00000028328	21916	tropomodulin 1
Tmem43	-1.123214328	1.50E-10	2.90E-09	22868	22505	19657	6182	9365	14385	8.256202622	8.219632144	8.294574465	7.062464962	7.092100926	7.246200357	Tmem43	ENSMUSG00000030095	74122	transmembrane protein 43
Jak3	-1.122855225	4.47E-07	1.69E-06	2961	2520	1977	845	1099	1307	5.307479189	5.061427094	4.981499399	4.192382193	4.002142138	3.787315676	Jak3	ENSMUSG00000031805	16453	Janus kinase 3
Nes	-1.122745979	4.74E-11	1.23E-09	26661	26691	20736	7295	10523	15840	8.477593788	8.46572916	8.371665535	7.301275903	7.260279565	7.385195077	Nes	ENSMUSG00000004891	18008	nestin
Chst1	-1.12259905	1.33E-06	4.33E-06	540	540	490	146	268	299	2.854743266	2.841282297	2.971006575	1.664753702	1.97021422	1.664267067	Chst1	ENSMUSG00000027221	76969	carbohydrate (keratan sulfate Gal-6) sulfotransferase 1
Uchl1	-1.121713435	6.13E-09	5.06E-08	1320	1252	1109	375	541	744	4.142575552	4.052859095	4.147953308	3.021725083	2.980969222	2.975553346	Uchl1	ENSMUSG00000029223	22223	ubiquitin carboxy-terminal hydrolase L1
Pitpnc1	-1.121587839	4.50E-09	3.97E-08	2653	2455	2031	742	972	1513	5.149079426	5.023742627	5.020359527	4.005005566	3.825145995	3.998266502	Pitpnc1	ENSMUSG00000040430	71795	phosphatidylinositol transfer protein, cytoplasmic 1
4930447F24Rik	-1.120084581	0.000100449	0.000201551	268	349	273	87	104	231	1.846888107	2.21311341	2.129200951	0.92224751	0.61278549	1.293915725	4930447F24Rik	ENSMUSG00000102224	76873	RIKEN cDNA 4930447F24 gene
Crb2	-1.118925765	0.021984762	0.02932459	70	77	69	10	46	63	-0.073899737	0.048339103	0.158746208	-2.117846781	-0.547300154	-0.558444785	Crb2	ENSMUSG00000035403	241324	crumbs family member 2
Tkfc	-1.118202478	7.02E-08	3.56E-07	1245	1154	1076	348	566	651	4.058253232	3.935372567	4.104407459	2.914117478	3.046028074	2.783280272	Tkfc	ENSMUSG00000034371	225913	triokinase, FMN cyclase
Gpr176	-1.116646985	3.46E-08	1.99E-07	1276	1216	1098	378	559	671	4.093705945	4.010804301	4.133583573	3.033200703	3.028105361	2.826846799	Gpr176	ENSMUSG00000040133	381413	G protein-coupled receptor 176
Ccs	-1.116136369	2.16E-11	6.86E-10	5258	5223	4398	1505	2192	3057	6.135682847	6.112564549	6.134677151	5.024630982	4.997560958	5.012323502	Ccs	ENSMUSG00000034108	12460	copper chaperone for superoxide dismutase
Tubb3	-1.115939272	2.74E-10	4.58E-09	5190	4894	4485	1424	2137	3127	6.116907061	6.018719849	6.162931877	4.944852437	4.960916571	5.044971961	Tubb3	ENSMUSG00000062380	22152	tubulin, beta 3 class III
Akr1c14	-1.115253397	0.000370053	0.000661055	142	183	133	38	63	118	0.935590163	1.285731985	1.096646803	-0.258896737	-0.101682706	0.332788203	Akr1c14	ENSMUSG00000033715	105387	aldo-keto reductase family 1, member C14
Cadm2	-1.11487113	0.001711576	0.002710495	107	95	79	23	37	76	0.53080907	0.34764984	0.351677797	-0.967364529	-0.854145463	-0.292966692	Cadm2	ENSMUSG00000064115	239857	cell adhesion molecule 2
Jarid2	-1.114776363	7.63E-06	2.01E-05	625	661	501	221	260	300	3.065254867	3.132449822	3.002978066	2.26063743	1.926653696	1.66906254	Jarid2	ENSMUSG00000038518	16468	jumonji, AT rich interactive domain 2
Plcb4	-1.11472971	6.31E-05	0.000132106	356	360	219	77	136	222	2.255124006	2.257748282	1.812384999	0.747493711	0.996653237	1.236921209	Plcb4	ENSMUSG00000039943	18798	phospholipase C, beta 4
Synpo	-1.113702628	1.03E-05	2.60E-05	767	713	558	183	388	359	3.360172087	3.241531251	3.158171533	1.989322092	2.502420047	1.927024846	Synpo	ENSMUSG00000043079	104027	synaptopodin
Retsat	-1.113383804	3.38E-11	9.47E-10	5736	5827	5090	1679	2497	3408	6.26118945	6.270408468	6.345455566	5.182404506	5.185430655	5.169066914	Retsat	ENSMUSG00000056666	67442	retinol saturase (all trans retinol 13,14 reductase)
Plekha7	-1.111943556	4.05E-08	2.27E-07	1575	1632	1279	446	745	832	4.397201658	4.434978177	4.353556613	3.271476605	3.44187041	3.136558765	Plekha7	ENSMUSG00000045659	233765	pleckstrin homology domain containing, family A member 7
Cd24a	-1.111941261	3.09E-11	8.87E-10	13704	14148	12291	4042	5787	8585	7.517514285	7.550025294	7.617172703	6.449541767	6.397730402	6.50161633	Cd24a	ENSMUSG00000047139	12484	CD24a antigen
Cdkn1a	-1.111564134	5.92E-11	1.44E-09	40790	42202	34969	11946	18610	22839	9.091058496	9.126665877	9.125579279	8.012773081	8.082753494	7.913084674	Cdkn1a	ENSMUSG00000023067	12575	cyclin-dependent kinase inhibitor 1A (P21)
C630043F03Rik	-1.11102461	2.39E-05	5.52E-05	393	403	264	126	146	190	2.39737202	2.420074111	2.080997552	1.453234237	1.098311619	1.013823997	C630043F03Rik	NA	68285	RIKEN cDNA C630043F03 gene
Flt3l	-1.110238135	5.48E-07	2.01E-06	647	641	479	176	285	333	3.115081169	3.088196791	2.938310477	1.933259055	2.058631257	1.818983718	Flt3l	ENSMUSG00000110206	14256	FMS-like tyrosine kinase 3 ligand
Jun	-1.110120427	5.02E-11	1.27E-09	29345	29799	24615	8980	12388	16369	8.615972346	8.624633676	8.619055905	7.601059	7.495656676	7.43258497	Jun	ENSMUSG00000052684	16476	jun proto-oncogene
Tbl1xr1	-1.109230072	4.64E-09	4.06E-08	2321	2627	2184	724	1120	1390	4.95628385	5.121394574	5.125097926	3.969607797	4.029425514	3.876052822	Tbl1xr1	ENSMUSG00000027630	81004	transducin (beta)-like 1X-linked receptor 1
Sepp1	-1.108774479	3.16E-09	3.01E-08	1589	1621	1444	464	696	975	4.409960388	4.425227637	4.528496588	3.328475402	3.343849997	3.365035778	Selenop	ENSMUSG00000064373	20363	selenoprotein P
Ccl5	-1.108393393	2.01E-05	4.71E-05	795	820	559	264	341	342	3.411830107	3.442970435	3.160750589	2.516432553	2.316633326	1.857305073	Ccl5	ENSMUSG00000035042	20304	chemokine (C-C motif) ligand 5
Fbxo24	-1.108307989	0.000797862	0.001336698	124	116	118	45	42	74	0.741593201	0.632857938	0.92522454	-0.018789082	-0.675696506	-0.330762699	Chuk	ENSMUSG00000025199	12675	conserved helix-loop-helix ubiquitous kinase
Angptl4	-1.107464949	1.65E-07	7.29E-07	880	916	703	236	416	489	3.558192848	3.6024967	3.490957718	2.355106193	2.602703574	2.371442653	Angptl4	ENSMUSG00000002289	57875	angiopoietin-like 4
St3gal1	-1.106723473	0.000874506	0.001454717	127	128	145	40	47	104	0.775792142	0.773637917	1.220480516	-0.186122245	-0.516910324	0.152772725	St3gal1	ENSMUSG00000013846	20442	ST3 beta-galactoside alpha-2,3-sialyltransferase 1
Lima1	-1.105371777	2.58E-11	7.77E-10	18140	18020	14589	5350	7600	10020	7.922064345	7.899002694	7.864434967	6.853954033	6.790856218	6.724576422	Lima1	ENSMUSG00000023022	65970	LIM domain and actin binding 1
B630005N14Rik	-1.104586315	4.79E-11	1.24E-09	10432	10181	8374	2839	4241	6320	7.123968068	7.075349033	7.063608031	5.939954609	5.949407804	6.059803774	Bmt2	ENSMUSG00000042742	101148	base methyltransferase of 25S rRNA 2
Myl12b	-1.102508034	3.38E-10	5.37E-09	4396	4814	4108	1386	1988	2710	5.87741722	5.99494714	6.03628631	4.905848783	4.856696716	4.838581069	Myl12b	ENSMUSG00000034868	67938	myosin, light chain 12B, regulatory
Nmnat1	-1.10055084	2.81E-07	1.14E-06	683	731	663	202	302	466	3.193076412	3.277447247	3.40655182	2.131348379	2.141941062	2.302133518	Nmnat1	ENSMUSG00000028992	66454	nicotinamide nucleotide adenylyltransferase 1
Adck5	-1.099584671	6.34E-10	8.55E-09	2952	2922	2434	872	1279	1626	5.303088997	5.274875137	5.281393947	4.237724293	4.220787089	4.102092687	Adck5	ENSMUSG00000022550	268822	aarF domain containing kinase 5
Col23a1	-1.099304694	0.002860477	0.00438256	81	101	74	33	39	39	0.133736175	0.435049065	0.258434694	-0.458721058	-0.780096843	-1.231876247	Col23a1	ENSMUSG00000063564	237759	collagen, type XXIII, alpha 1
Ptk2	-1.098086969	6.42E-12	2.84E-10	16192	16132	13116	4729	6758	9298	7.758181245	7.739339037	7.710891649	6.675973537	6.6214762	6.616701286	Ptk2	ENSMUSG00000022607	14083	PTK2 protein tyrosine kinase 2
Dennd2c	-1.097575995	6.23E-11	1.49E-09	5472	5571	4445	1512	2372	3279	6.193225542	6.205603668	6.150009884	5.031322721	5.111368509	5.113419879	Dennd2c	ENSMUSG00000007379	329727	DENN/MADD domain containing 2C
Kctd11	-1.09746389	3.80E-10	5.87E-09	8274	7931	6032	2308	3277	4544	6.789647459	6.71508754	6.590386997	5.641291751	5.577476508	5.583962066	Kctd11	ENSMUSG00000046731	216858	potassium channel tetramerisation domain containing 11
Pnp	-1.097456443	5.88E-08	3.08E-07	12436	11454	10666	3090	5108	8359	7.377451149	7.245304387	7.412605533	6.062151493	6.217705578	6.463134669	Pnp	ENSMUSG00000021871	18950	purine-nucleoside phosphorylase
Gypc	-1.096890875	1.06E-09	1.27E-08	2112	2293	1875	647	952	1280	4.820212457	4.925300445	4.905112397	3.807539417	3.795181617	3.757231641	Gypc	ENSMUSG00000090523	71683	glycophorin C
Card10	-1.096452554	8.27E-09	6.39E-08	5465	5435	4120	1585	2415	2781	6.191379166	6.169954333	6.040493557	5.099318571	5.137277137	4.875873684	Card10	ENSMUSG00000033170	105844	caspase recruitment domain family, member 10
Arc	-1.095312134	0.000320148	0.000580002	4207	3542	4014	1852	1458	1931	5.814033306	5.552390554	6.002898055	5.323833677	4.409626659	4.349925175	Arc	ENSMUSG00000022602	11838	activity regulated cytoskeletal-associated protein
Kdelr3	-1.094223025	1.44E-10	2.83E-09	7919	8215	7393	2458	3480	4915	6.726389062	6.765838591	6.883871346	5.732108396	5.664163116	5.697158411	Kdelr3	ENSMUSG00000010830	105785	KDEL (Lys-Asp-Glu-Leu) endoplasmic reticulum protein retention receptor 3
Prss16	-1.091788935	8.25E-06	2.15E-05	352	319	339	99	164	204	2.238870955	2.083858217	2.440673346	1.10734979	1.26498857	1.115697355	Prss16	ENSMUSG00000006179	54373	protease, serine 16 (thymus)
Cyp4f16	-1.090170113	1.19E-09	1.37E-08	3506	3383	2988	943	1585	2089	5.551140283	5.486150034	5.577147267	4.350572175	4.53004155	4.463313522	Cyp4f16	ENSMUSG00000048440	70101	cytochrome P450, family 4, subfamily f, polypeptide 16
Ostf1	-1.089072297	1.18E-10	2.42E-09	6673	6448	5759	1887	2805	4136	6.479442429	6.416481344	6.523578967	5.350834515	5.35317379	5.448277544	Ostf1	ENSMUSG00000024725	20409	osteoclast stimulating factor 1
Tmem79	-1.088527793	4.77E-05	0.000102652	255	299	246	72	111	205	1.775442637	1.990770453	1.979472158	0.651479251	0.705916617	1.122705999	Tmem79	ENSMUSG00000001420	71913	transmembrane protein 79
Spag4	-1.087467801	2.27E-06	6.89E-06	418	480	385	145	186	252	2.486113082	2.67171455	2.623795618	1.65488279	1.445586834	1.418750224	Spag4	ENSMUSG00000038180	245865	sperm associated antigen 4
Slc27a3	-1.087412192	1.49E-10	2.90E-09	7113	6943	6425	2074	3175	4272	6.571550887	6.523171674	6.681434019	5.487110727	5.531871208	5.494938069	Slc27a3	ENSMUSG00000027932	26568	solute carrier family 27 (fatty acid transporter), member 3
Myh11	-1.08697665	0.000658738	0.001118857	147	161	97	34	73	80	0.985151055	1.102096682	0.644827833	-0.416480596	0.107847728	-0.220221512	Myh11	ENSMUSG00000018830	17880	myosin, heavy polypeptide 11, smooth muscle
Lrrc73	-1.086763512	1.96E-05	4.61E-05	351	311	339	109	164	182	2.234778921	2.047340664	2.440673346	1.245304943	1.26498857	0.952208882	Lrrc73	ENSMUSG00000071073	224813	leucine rich repeat containing 73
Pear1	-1.086127799	7.99E-10	1.01E-08	4748	4372	3793	1303	2083	2578	5.988519934	5.856036871	5.921215421	4.816802136	4.924009554	4.766577139	Pear1	ENSMUSG00000028073	73182	platelet endothelial aggregation receptor 1
Myo15	-1.085600535	0.015644321	0.021355231	76	89	52	38	26	30	0.043041535	0.254612531	-0.243351812	-0.258896737	-1.347576962	-1.596025654	Myo15	ENSMUSG00000042678	17910	myosin XV
Tm6sf1	-1.084631532	0.001488518	0.002381366	87	91	99	27	48	52	0.23554142	0.286296314	0.674006911	-0.741985034	-0.48714746	-0.828917457	Tm6sf1	ENSMUSG00000038623	107769	transmembrane 6 superfamily member 1
Tmem176b	-1.082495212	5.70E-09	4.79E-08	2678	2849	2446	863	1111	1742	5.162605322	5.238388138	5.288486599	4.22276804	4.01779576	4.20143062	Tmem176b	ENSMUSG00000029810	65963	transmembrane protein 176B
Kif18b	-1.082421326	1.26E-11	4.57E-10	14823	14711	11988	4272	6114	8968	7.63074625	7.606318306	7.581164031	6.529371474	6.477018316	6.564574819	Kif18b	ENSMUSG00000051378	70218	kinesin family member 18B
Pitpnm3	-1.081656031	0.000362153	0.000648469	145	136	141	47	71	73	0.96553053	0.860395739	1.180372142	0.043063281	0.068305663	-0.350038627	Pitpnm3	ENSMUSG00000040543	327958	PITPNM family member 3
Fads2	-1.081468532	2.29E-11	7.16E-10	7126	7087	5767	2013	3112	4173	6.574184814	6.552783026	6.525581359	5.444055845	5.50296564	5.461122119	Fads2	ENSMUSG00000024665	56473	fatty acid desaturase 2
Plekha4	-1.081305924	7.11E-07	2.52E-06	1265	1296	1173	453	492	773	4.081225434	4.102648347	4.228833909	3.293911164	2.844257326	3.03062143	Plekha4	ENSMUSG00000040428	69217	pleckstrin homology domain containing, family A (phosphoinositide binding specific) member 4
Adora2b	-1.081131912	0.006593806	0.009531827	88	67	70	24	46	32	0.251831812	-0.149404584	0.179242596	-0.907633835	-0.547300154	-1.50679192	Adora2b	ENSMUSG00000018500	11541	adenosine A2b receptor
Exoc7	-1.081105028	9.72E-11	2.08E-09	8119	8291	6695	2516	3384	4755	6.762368081	6.77912241	6.740813572	5.765746519	5.623816839	5.649425621	Exoc7	ENSMUSG00000020792	53413	exocyst complex component 7
Nr1d1	-1.079950055	2.22E-07	9.40E-07	1669	1389	1165	455	671	795	4.480779029	4.202549391	4.218968353	3.300257478	3.291150626	3.071038503	Nr1d1	ENSMUSG00000020889	217166	nuclear receptor subfamily 1, group D, member 1
Shc2	-1.079928286	8.12E-07	2.84E-06	535	532	507	163	254	312	2.841349216	2.819792118	3.020122969	1.822983306	1.893097847	1.725398293	Shc2	ENSMUSG00000020312	216148	SHC (Src homology 2 domain containing) transforming protein 2
Col18a1	-1.079722588	1.63E-10	3.06E-09	10377	9738	8551	3127	4253	5854	7.116342491	7.011174076	7.093781089	6.079320247	5.95348324	5.949326406	Col18a1	ENSMUSG00000001435	12822	collagen, type XVIII, alpha 1
Impdh1	-1.079706007	1.22E-10	2.47E-09	8135	8298	6777	2390	3740	4611	6.765208011	6.78033979	6.75837397	5.691645064	5.768085997	5.605072691	Impdh1	ENSMUSG00000003500	23917	inosine 5'-phosphate dehydrogenase 1
Fbxo33	-1.078047915	1.35E-10	2.68E-09	4136	3964	3414	1204	1714	2451	5.789483924	5.714736833	5.769376635	4.702860207	4.642859085	4.693734354	Fbxo33	ENSMUSG00000035329	70611	F-box protein 33
Park7	-1.075192765	2.51E-09	2.48E-08	4026	4409	3861	1213	1859	2763	5.75060503	5.868191979	5.94684465	4.713598529	4.759954789	4.866510047	Park7	ENSMUSG00000028964	57320	Parkinson disease (autosomal recessive, early onset) 7
Tst	-1.073826899	4.70E-07	1.76E-06	2053	2139	2003	553	947	1530	4.779357088	4.82504911	5.000340532	3.58130185	3.78759226	4.014371925	Tst	ENSMUSG00000044986	22117	thiosulfate sulfurtransferase, mitochondrial
Dll1	-1.071386604	0.00029498	0.000539109	188	188	205	54	113	107	1.33780897	1.324397521	1.717476297	0.240782279	0.731457426	0.193283269	Dll1	ENSMUSG00000014773	13388	delta-like 1 (Drosophila)
Zfp296	-1.070663222	1.27E-06	4.17E-06	816	769	571	206	375	424	3.449394865	3.35045504	3.191344912	2.159546634	2.453379311	2.166279207	Zfp296	ENSMUSG00000011267	63872	zinc finger protein 296
Ddah2	-1.070571759	7.56E-07	2.66E-06	830	956	851	245	448	563	3.473905418	3.664089155	3.766275256	2.408953996	2.709377871	2.574222685	Ddah2	ENSMUSG00000007039	51793	dimethylarginine dimethylaminohydrolase 2
Gprin3	-1.0687312	1.29E-05	3.19E-05	375	387	283	92	182	224	2.329919926	2.361786074	2.180936584	1.002278375	1.414387947	1.249782663	Gprin3	ENSMUSG00000045441	243385	GPRIN family member 3
Kif21b	-1.068009515	5.88E-06	1.60E-05	481	441	320	135	196	235	2.688168068	2.549743082	2.357683998	1.552271085	1.520754099	1.318541418	Kif21b	ENSMUSG00000041642	16565	kinesin family member 21B
Cyb5a	-1.067523411	8.31E-09	6.40E-08	2395	2777	2299	745	1136	1668	5.001542595	5.201473763	5.199102174	4.010821667	4.049871948	4.138854683	Cyb5a	ENSMUSG00000024646	109672	cytochrome b5 type A (microsomal)
Gm16796	-1.067516408	0.006944177	0.010007483	81	91	51	23	24	60	0.133736175	0.286296314	-0.270890802	-0.967364529	-1.458716487	-0.627326521	Gm16796	ENSMUSG00000085495	100502946	predicted gene, 16796
Aaas	-1.066903572	1.29E-10	2.60E-09	12880	13200	11117	4101	5396	7904	7.428056974	7.44997295	7.472348942	6.470444817	6.296822711	6.382400621	Aaas	ENSMUSG00000036678	223921	achalasia, adrenocortical insufficiency, alacrimia
Sec1	-1.066886249	0.003428058	0.005172709	157	90	99	38	38	87	1.079440177	0.270541399	0.674006911	-0.258896737	-0.816646122	-0.101127403	Sec1	ENSMUSG00000040364	56546	secretory blood group 1
Mir1949	-1.066707111	1.78E-08	1.17E-07	2188	2337	1865	594	1016	1461	4.871190174	4.952709132	4.897401097	3.684367168	3.888955587	3.947856315	Mir1949	ENSMUSG00000105743	100316700	microRNA 1949
Klf5	-1.065660899	3.72E-10	5.80E-09	3667	3552	2924	1028	1631	2106	5.615895372	5.556456694	5.545919822	4.474999736	4.571290484	4.47499897	Klf5	ENSMUSG00000005148	12224	Kruppel-like factor 5
Vaultrc5	-1.065351058	1.84E-05	4.36E-05	296	285	276	78	137	200	1.989713503	1.921840048	2.144917369	0.765952951	1.007147541	1.087317252	Vaultrc5	NA	378472	vault RNA component 5
Ccdc96	-1.064967936	0.000329994	0.000595946	178	226	128	46	81	126	1.25940877	1.588611592	1.041738488	0.012468547	0.255994485	0.426392012	Ccdc96	ENSMUSG00000050677	66717	coiled-coil domain containing 96
Vim	-1.064455576	1.47E-11	5.15E-10	131831	135683	112665	39894	57854	81234	10.7834348	10.81149733	10.81344495	9.752361673	9.719040895	9.74360778	Vim	ENSMUSG00000026728	22352	vimentin
Dyrk3	-1.063995334	2.32E-09	2.33E-08	2223	2099	1903	642	938	1371	4.894074364	4.797828566	4.926487303	3.796358396	3.77382999	3.856215845	Dyrk3	ENSMUSG00000016526	226419	dual-specificity tyrosine-(Y)-phosphorylation regulated kinase 3
Rnf122	-1.063295729	7.15E-06	1.90E-05	461	464	353	155	191	236	2.627035811	2.622915803	2.498906601	1.750678352	1.483659957	1.324632718	Rnf122	ENSMUSG00000039328	68867	ring finger protein 122
Capg	-1.0630329	4.43E-11	1.16E-09	19359	19904	17836	5927	8806	12285	8.015889002	8.04245395	8.154330072	7.001699959	7.003318307	7.018556058	Capg	ENSMUSG00000056737	12332	capping protein (actin filament), gelsolin-like
Pvrl1	-1.062800246	1.08E-10	2.26E-09	7146	6669	5796	1982	3123	4164	6.578227643	6.465092102	6.532816819	5.421672995	5.508054558	5.458008272	Nectin1	ENSMUSG00000032012	58235	nectin cell adhesion molecule 1
Fgd5	-1.062357852	0.002945055	0.004499626	98	77	79	21	49	52	0.405353484	0.048339103	0.351677797	-1.094799501	-0.457986214	-0.828917457	Fgd5	ENSMUSG00000034037	232237	FYVE, RhoGEF and PH domain containing 5
Ccbl2	-1.062043037	1.29E-05	3.18E-05	582	532	441	157	199	406	2.962598638	2.819792118	2.819293739	1.769097148	1.542561248	2.103896987	Kyat3	ENSMUSG00000040213	229905	kynurenine aminotransferase 3
Itpk1	-1.061580148	5.95E-06	1.61E-05	530	525	545	153	234	394	2.827829648	2.800721979	3.124217376	1.73202136	1.775249178	2.06075802	Itpk1	ENSMUSG00000057963	217837	inositol 1,3,4-triphosphate 5/6 kinase
Trpm6	-1.060412649	0.001077714	0.001765394	137	131	102	37	74	61	0.884265952	0.806786486	0.716697962	-0.296708567	0.127219629	-0.603998608	Trpm6	ENSMUSG00000024727	225997	transient receptor potential cation channel, subfamily M, member 6
Nfkbie	-1.058840372	5.28E-10	7.39E-09	2779	2786	2366	804	1275	1680	5.21599441	5.206140045	5.240529991	4.12068349	4.216271519	4.149188321	Nfkbie	ENSMUSG00000023947	18037	nuclear factor of kappa light polypeptide gene enhancer in B cells inhibitor, epsilon
Cd74	-1.057695709	1.71E-06	5.39E-06	403	446	351	131	181	249	2.433526062	2.565968914	2.490730097	1.509091749	1.406481653	1.401564544	Cd74	ENSMUSG00000024610	16149	CD74 antigen (invariant polypeptide of major histocompatibility complex, class II antigen-associated)
Idi1	-1.057650285	2.23E-11	7.01E-10	10837	11537	9301	3263	4831	6959	7.178912237	7.255720032	7.215061687	6.140727388	6.137284688	6.198731026	Idi1	ENSMUSG00000058258	319554	isopentenyl-diphosphate delta isomerase
Klhl10	-1.057223228	0.002948967	0.004504517	142	115	95	47	36	84	0.935590163	0.620481865	0.615046393	0.043063281	-0.892645578	-0.150968966	Klhl10	ENSMUSG00000001558	66720	kelch-like 10
Zfp697	-1.056646532	3.15E-08	1.84E-07	1983	1729	1435	569	767	1064	4.72933447	4.518221857	4.51948215	3.622402897	3.483802491	3.490893491	Zfp697	ENSMUSG00000050064	242109	zinc finger protein 697
Adamts1	-1.055031824	8.35E-08	4.13E-07	3713	3743	3180	1291	1448	2241	5.633875246	5.631997949	5.666967977	4.803460809	4.399704198	4.564580691	Adamts1	ENSMUSG00000022893	11504	a disintegrin-like and metallopeptidase (reprolysin type) with thrombospondin type 1 motif, 1
Lbp	-1.054636499	0.000308016	0.000560187	165	167	125	50	81	79	1.15067157	1.154541207	1.007761561	0.131137182	0.255994485	-0.238066827	Lbp	ENSMUSG00000016024	16803	lipopolysaccharide binding protein
Eno3	-1.054045716	2.20E-06	6.72E-06	466	547	433	136	238	322	2.642563435	2.859827144	2.792935729	1.56286697	1.799601638	1.770720551	Eno3	ENSMUSG00000060600	13808	enolase 3, beta muscle
Hnrnpa1	-1.054019499	2.50E-05	5.76E-05	291	286	206	77	134	156	1.9652241	1.926874373	1.724466486	0.747493711	0.975432805	0.731579946	Hnrnpa1	ENSMUSG00000046434	15382	heterogeneous nuclear ribonucleoprotein A1
Casp3	-1.054000791	6.42E-12	2.84E-10	20393	20962	16657	6088	8893	12503	8.090954582	8.11716801	8.055671645	7.040362033	7.017500086	7.043929746	Casp3	ENSMUSG00000031628	12367	caspase 3
Rhob	-1.053631452	3.17E-11	9.02E-10	18104	17906	16023	5320	8253	11255	7.919198546	7.88984732	7.999690393	6.845842386	6.909760802	6.892238716	Rhob	ENSMUSG00000054364	11852	ras homolog family member B
Shpk	-1.052379225	7.27E-09	5.79E-08	1601	1561	1387	458	705	1022	4.420807349	4.370850731	4.47043011	3.30972491	3.362360192	3.432865415	Shpk	ENSMUSG00000005951	74637	sedoheptulokinase
Mdm1	-1.051660539	3.98E-09	3.59E-08	3384	3426	2614	915	1469	2152	5.500059606	5.504366273	5.38428765	4.307116873	4.420463118	4.506151921	Mdm1	ENSMUSG00000020212	17245	transformed mouse 3T3 cell double minute 1
Faah	-1.050230392	0.006043901	0.008782999	91	97	57	35	33	40	0.299627566	0.377375113	-0.113030163	-0.375441787	-1.014723174	-1.196553701	Faah	ENSMUSG00000034171	14073	fatty acid amide hydrolase
Tango2	-1.050015011	1.10E-07	5.18E-07	1637	1630	1302	501	775	856	4.45286733	4.433210246	4.379252096	3.439010593	3.498753323	3.177520723	Tango2	ENSMUSG00000013539	27883	transport and golgi organization 2
Gspt2	-1.049944444	2.51E-06	7.54E-06	818	662	606	210	293	509	3.452921971	3.134627239	3.277042434	2.187204287	2.098435737	2.429118286	Gspt2	ENSMUSG00000071723	14853	G1 to S phase transition 2
Wdyhv1	-1.049756798	3.43E-08	1.98E-07	1084	1117	908	339	497	624	3.858654865	3.888402881	3.859713913	2.876387594	2.858816164	2.722297505	Wdyhv1	ENSMUSG00000022359	76773	WDYHV motif containing 1
Sema6b	-1.049012869	1.16E-05	2.89E-05	312	323	284	95	129	222	2.065397827	2.101776118	2.186009554	1.048249057	0.920974624	1.236921209	Sema6b	ENSMUSG00000001227	20359	sema domain, transmembrane domain (TM), and cytoplasmic domain, (semaphorin) 6B
Cenpt	-1.048781204	1.55E-10	2.98E-09	6609	6405	5124	1946	2860	3744	6.465541144	6.406829781	6.355058714	5.395236584	5.381178529	5.304670916	Cenpt	ENSMUSG00000036672	320394	centromere protein T
Spire2	-1.048377807	1.68E-08	1.12E-07	1298	1355	1021	390	579	763	4.118347664	4.166823561	4.028776399	3.078211596	3.078733681	3.011868927	Spire2	ENSMUSG00000010154	234857	spire homolog 2 (Drosophila)
Armc7	-1.048121794	2.04E-08	1.30E-07	1034	1063	871	305	472	638	3.790594575	3.816985559	3.799754274	2.72422251	2.784506733	2.754239783	Armc7	ENSMUSG00000057219	276905	armadillo repeat containing 7
Pcdhgc3	-1.047958671	3.47E-11	9.67E-10	9648	9115	8030	2812	4222	5725	7.01126604	6.915802086	7.003097661	5.926171558	5.942931391	5.917186823	Pcdhgc3	ENSMUSG00000102918	93706	protocadherin gamma subfamily C, 3
Efna3	-1.047291817	3.84E-07	1.49E-06	799	878	668	270	330	505	3.419061114	3.541443029	3.417376593	2.548774468	2.269464672	2.417766145	Efna3	ENSMUSG00000028039	13638	ephrin A3
Celf4	-1.047234182	7.08E-10	9.28E-09	5065	4940	3931	1500	2035	3105	6.081742076	6.032213847	5.972760546	5.019832093	4.890391425	5.034790406	Celf4	ENSMUSG00000024268	108013	CUGBP, Elav-like family member 4
Pnpla6	-1.045928787	1.45E-08	9.97E-08	2084	2120	1651	670	899	1169	4.800967643	4.812183369	4.721654675	3.857884577	3.71262815	3.6265066	Pnpla6	ENSMUSG00000004565	50767	patatin-like phospholipase domain containing 6
Fermt3	-1.045895262	0.002307075	0.003584539	188	133	119	61	47	98	1.33780897	0.828469816	0.937308601	0.414641363	-0.516910324	0.068170563	Fermt3	ENSMUSG00000024965	108101	fermitin family member 3
Ctc1	-1.045542614	1.31E-10	2.63E-09	9982	9421	8056	2889	4485	5656	7.060359723	6.963434123	7.007760841	5.965136189	6.030093271	5.899697386	Ctc1	ENSMUSG00000020898	68964	CTS telomere maintenance complex component 1
Letm2	-1.045202255	3.84E-06	1.10E-05	403	381	318	106	185	239	2.433526062	2.339306265	2.348663994	1.205285605	1.437850136	1.342753813	Letm2	ENSMUSG00000037363	270035	leucine zipper-EF-hand containing transmembrane protein 2
Micall1	-1.044947943	6.59E-10	8.78E-09	13783	12997	10745	3990	6228	7503	7.525806526	7.427615505	7.423250899	6.430864247	6.503666499	6.307298356	Micall1	ENSMUSG00000033039	27008	microtubule associated monooxygenase, calponin and LIM domain containing -like 1
Il6ra	-1.044507854	4.06E-10	6.17E-09	3509	3495	2937	1097	1539	2067	5.552373862	5.533124667	5.552317835	4.568665058	4.487578442	4.448049302	Il6ra	ENSMUSG00000027947	16194	interleukin 6 receptor, alpha
Nr2f1	-1.044382486	7.95E-05	0.000163029	257	246	203	65	101	187	1.786667182	1.710393287	1.703393483	0.505325816	0.570955092	0.991025589	Nr2f1	ENSMUSG00000069171	13865	nuclear receptor subfamily 2, group F, member 1
Celsr2	-1.043351488	5.66E-06	1.54E-05	611	574	423	161	290	307	3.032627133	2.929204305	2.759296243	1.80524395	2.083637455	1.70219181	Celsr2	ENSMUSG00000068740	53883	cadherin, EGF LAG seven-pass G-type receptor 2
Macrod2	-1.042681252	2.77E-05	6.30E-05	249	227	205	77	101	143	1.741235311	1.594951112	1.717476297	0.747493711	0.570955092	0.607170161	Macrod2	ENSMUSG00000068205	72899	MACRO domain containing 2
Etl4	-1.041509174	4.60E-07	1.73E-06	803	726	598	213	363	438	3.426256059	3.267559939	3.257898395	2.207605037	2.4065819	2.212999933	Etl4	ENSMUSG00000036617	208618	enhancer trap locus 4
Mbd4	-1.041310314	1.21E-09	1.39E-08	3559	3410	2721	1034	1442	2160	5.572779714	5.497614978	5.442146179	4.483390312	4.393717799	4.511501817	Mbd4	ENSMUSG00000030322	17193	methyl-CpG binding domain protein 4
Tcf7l2	-1.04115888	0.000314601	0.000571424	507	426	332	96	266	272	2.763953915	2.499941038	2.410650869	1.063252763	1.959446773	1.528369645	Tcf7l2	ENSMUSG00000024985	21416	transcription factor 7 like 2, T cell specific, HMG box
Fam212b	-1.040427956	8.67E-11	1.89E-09	7068	7192	5687	2070	3044	4485	6.562396135	6.573997812	6.505431269	5.484326483	5.47110203	5.565112834	Fam212b	ENSMUSG00000048458	109050	family with sequence similarity 212, member B
Rad9b	-1.040093408	0.000174497	0.000332386	192	153	146	56	75	98	1.368013771	1.029066521	1.230335772	0.292630423	0.146334855	0.068170563	Rad9b	ENSMUSG00000038569	231724	RAD9 checkpoint clamp component B
Slc25a23	-1.039747068	0.000118307	0.000233719	193	176	144	48	83	118	1.375467186	1.229797901	1.210557473	0.073022654	0.2907705	0.332788203	Slc25a23	ENSMUSG00000046329	66972	solute carrier family 25 (mitochondrial carrier; phosphate carrier), member 23
C4a	-1.039401306	0.000477144	0.000833209	173	179	114	51	82	81	1.218550853	1.254035668	0.875849955	0.159339525	0.273487274	-0.202594239	C4a	NA	625018	complement component 4A (Rodgers blood group)
Ralgps2	-1.038964894	1.00E-06	3.40E-06	676	647	594	188	287	470	3.178237274	3.101615809	3.248230262	2.028073885	2.068685808	2.31442897	Ralgps2	ENSMUSG00000026594	78255	Ral GEF with PH domain and SH3 binding motif 2
Gfer	-1.038894977	7.18E-10	9.32E-09	14518	14411	13652	4418	6578	9641	7.600753681	7.576595625	7.768672323	6.577845917	6.582534551	6.668956229	Gfer	ENSMUSG00000040888	11692	growth factor, erv1 (S. cerevisiae)-like (augmenter of liver regeneration)
Fggy	-1.037959628	0.00208811	0.003264347	142	143	138	30	87	103	0.935590163	0.932251811	1.149541726	-0.59341205	0.357904445	0.139012421	Fggy	ENSMUSG00000028573	75578	FGGY carbohydrate kinase domain containing
Ankrd24	-1.036691448	7.81E-07	2.74E-06	652	720	641	228	289	448	3.12616929	3.255605023	3.357933606	2.305493636	2.07867077	2.24546917	Ankrd24	ENSMUSG00000054708	70615	ankyrin repeat domain 24
Ulk1	-1.035604205	1.49E-08	1.02E-07	11378	10746	9111	3419	5399	5960	7.249187069	7.153261517	7.185288135	6.208089576	6.297624434	5.975210095	Ulk1	ENSMUSG00000029512	22241	unc-51 like kinase 1
Ube2o	-1.034873963	1.89E-10	3.46E-09	7156	6710	6045	2162	3171	4187	6.580244817	6.473933002	6.59349245	5.547042766	5.530053052	5.465952561	Ube2o	ENSMUSG00000020802	217342	ubiquitin-conjugating enzyme E2O
Brix1	-1.034626551	2.34E-09	2.34E-08	7313	7507	5356	2189	3172	4190	6.611550195	6.635832252	6.418933359	5.564942793	5.530507806	5.466985555	Brix1	ENSMUSG00000022247	67832	BRX1, biogenesis of ribosomes
Pidd1	-1.034248442	1.58E-08	1.07E-07	4124	3894	2994	1242	1765	2171	5.785293149	5.689039766	5.58004048	4.747665923	4.685136466	4.51882568	Pidd1	ENSMUSG00000025507	57913	p53 induced death domain protein 1
Arhgap26	-1.033881712	0.000235529	0.000437075	362	308	182	94	115	184	2.279165336	2.033404706	1.546577808	1.033087675	0.756553926	0.967861113	Arhgap26	ENSMUSG00000036452	71302	Rho GTPase activating protein 26
Fbf1	-1.033185629	1.57E-09	1.71E-08	7159	7132	5321	2181	2919	4235	6.580849419	6.561913303	6.409476377	5.559662196	5.410627658	5.48239236	Fbf1	ENSMUSG00000020776	217335	Fas (TNFRSF6) binding factor 1
Pfkm	-1.032921947	1.24E-09	1.42E-08	4089	4555	3894	1361	1937	2731	5.773000058	5.915180315	5.959120166	4.879601144	4.819221528	4.849712027	Pfkm	ENSMUSG00000033065	18642	phosphofructokinase, muscle
Fth1	-1.032585101	6.35E-11	1.51E-09	35928	37480	30051	11281	16775	21256	8.907956699	8.955480076	8.906921741	7.93014509	7.93299647	7.809461652	Fth1	ENSMUSG00000024661	14319	ferritin heavy polypeptide 1
Anpep	-1.032482349	2.25E-05	5.23E-05	1034	1029	800	325	551	471	3.790594575	3.770134969	3.677212094	2.815662204	3.007345857	2.317486529	Anpep	ENSMUSG00000039062	16790	alanyl (membrane) aminopeptidase
Dgkh	-1.029891795	1.76E-07	7.70E-07	1029	895	810	280	460	577	3.783608565	3.569076354	3.695114233	2.601116852	2.747431292	2.609575622	Dgkh	ENSMUSG00000034731	380921	diacylglycerol kinase, eta
Myb	-1.029332481	0.000933216	0.001544874	165	137	115	55	66	70	1.15067157	0.87088262	0.888352921	0.266939256	-0.035567979	-0.409461609	Myb	ENSMUSG00000019982	17863	myeloblastosis oncogene
Fam129c	-1.029317105	1.35E-06	4.39E-06	489	461	371	139	202	296	2.711913639	2.613579389	2.570481767	1.594195546	1.564043672	1.649784261	Fam129c	ENSMUSG00000043243	100037278	family with sequence similarity 129, member C
4833427G06Rik	-1.028268956	2.88E-05	6.52E-05	225	233	212	70	104	151	1.595667999	1.632414137	1.765710962	0.611209824	0.61278549	0.684990914	4833427G06Rik	ENSMUSG00000032057	235345	RIKEN cDNA 4833427G06 gene
4931428F04Rik	-1.027601782	1.40E-05	3.42E-05	535	629	507	190	304	295	2.841349216	3.060978405	3.020122969	2.043287772	2.151433301	1.644924169	4931428F04Rik	ENSMUSG00000014837	74356	RIKEN cDNA 4931428F04 gene
Inhbb	-1.026638835	0.000173071	0.000329869	326	229	200	92	112	144	2.128513564	1.607547188	1.682008104	1.002278375	0.718743541	0.617130434	Inhbb	ENSMUSG00000037035	16324	inhibin beta-B
Mafk	-1.0265936	3.60E-11	9.93E-10	16479	16597	14326	5135	7205	10658	7.7835271	7.780333531	7.838191431	6.794786832	6.713865372	6.813619057	Mafk	ENSMUSG00000018143	17135	v-maf musculoaponeurotic fibrosarcoma oncogene family, protein K (avian)
Kifc5b	-1.026512143	6.21E-11	1.49E-09	5252	5547	4517	1642	2428	3321	6.134035954	6.199376278	6.17318678	5.150269114	5.145019253	5.131774216	Kifc5b	ENSMUSG00000024301	16580	kinesin family member C5B
Coro2a	-1.025996156	9.62E-11	2.06E-09	5159	5030	4320	1582	2306	3095	6.108265743	6.058255605	6.108866124	5.096586464	5.070673972	5.030138566	Coro2a	ENSMUSG00000028337	107684	coronin, actin binding protein 2A
Slc16a2	-1.024052213	0.000961601	0.001587714	141	129	91	32	56	91	0.925470352	0.784772282	0.553573205	-0.502235672	-0.268862733	-0.037242395	Slc16a2	ENSMUSG00000033965	20502	solute carrier family 16 (monocarboxylic acid transporters), member 2
Gm13889	-1.023865062	0.05579833	0.069804389	76	79	57	40	45	18	0.043041535	0.084831709	-0.113030163	-0.186122245	-0.578343935	-2.292285925	Gm13889	ENSMUSG00000087006	620695	predicted gene 13889
Zmynd8	-1.023573187	6.05E-09	5.01E-08	4582	4435	3515	1465	1930	2557	5.937189147	5.876672551	5.811427474	4.985785342	4.814001053	4.754783216	Zmynd8	ENSMUSG00000039671	228880	zinc finger, MYND-type containing 8
Klhl21	-1.023452712	1.88E-10	3.46E-09	16626	15274	13623	4767	7553	9733	7.796338696	7.66049704	7.765604646	6.687518424	6.781907738	6.682656086	Klhl21	ENSMUSG00000073700	242785	kelch-like 21
4930402H24Rik	-1.022268375	1.88E-09	1.98E-08	2639	2461	2013	753	1134	1553	5.141449164	5.027262725	5.007522104	4.026217606	4.047331935	4.035879328	4930402H24Rik	ENSMUSG00000027309	228602	RIKEN cDNA 4930402H24 gene
Mmp2	-1.022203372	6.29E-11	1.50E-09	11711	11523	10431	3640	5376	7305	7.290800527	7.25396844	7.380466482	6.298436781	6.29146647	6.268722082	Mmp2	ENSMUSG00000031740	17390	matrix metallopeptidase 2
1700113A16Rik	-1.021460839	0.001383023	0.002225238	117	183	97	46	59	76	0.658494422	1.285731985	0.644827833	0.012468547	-0.194830132	-0.292966692	1700113A16Rik	ENSMUSG00000096935	76642	RIKEN cDNA 1700113A16 gene
Rnd1	-1.021153296	5.19E-11	1.30E-09	17972	19579	16346	5697	8588	11966	7.908641645	8.01870393	8.028482161	6.944606761	6.967157707	6.98060338	Rnd1	ENSMUSG00000054855	223881	Rho family GTPase 1
Atp2a3	-1.019514343	8.17E-05	0.000167201	270	236	197	87	111	131	1.85757233	1.650787048	1.66030095	0.92224751	0.705916617	0.481953172	Atp2a3	ENSMUSG00000020788	53313	ATPase, Ca++ transporting, ubiquitous
Shroom3	-1.018955908	1.71E-07	7.53E-07	926	938	889	288	427	640	3.631615126	3.63669747	3.829235191	2.641665052	2.640269236	2.758745776	Shroom3	ENSMUSG00000029381	27428	shroom family member 3
Bub1b	-1.018821914	2.17E-10	3.81E-09	10007	10951	8775	3246	4493	6743	7.063968064	7.180521697	7.13108324	6.133192921	6.03266379	6.15325055	Bub1b	ENSMUSG00000040084	12236	BUB1B, mitotic checkpoint serine/threonine kinase
Tmem8	-1.017656358	6.69E-07	2.39E-06	1009	953	877	332	479	542	3.755321241	3.659559838	3.809648335	2.84634438	2.80570208	2.519513879	Tmem8	ENSMUSG00000024180	60455	transmembrane protein 8 (five membrane-spanning domains)
Man2b1	-1.017113127	2.31E-11	7.16E-10	15134	14740	12603	4633	6548	9512	7.660700015	7.609159304	7.653335013	6.646389229	6.575940844	6.649524879	Man2b1	ENSMUSG00000005142	17159	mannosidase 2, alpha B1
S100a13	-1.01656411	8.78E-09	6.66E-08	3473	4107	3328	1114	1789	2446	5.537500849	5.765851237	5.732578715	4.590837592	4.704610988	4.690789892	S100a13	ENSMUSG00000042312	20196	S100 calcium binding protein A13
Pard6g	-1.016255709	1.60E-10	3.03E-09	4535	4454	3615	1378	2008	2712	5.922317703	5.882838517	5.851888342	4.897501381	4.871131187	4.839644868	Pard6g	ENSMUSG00000056214	93737	par-6 family cell polarity regulator gamma
Rgl1	-1.015949631	1.43E-08	9.88E-08	1816	1733	1436	505	783	1174	4.60248501	4.521553579	4.52048654	3.450468416	3.513550804	3.632657015	Rgl1	ENSMUSG00000026482	19731	ral guanine nucleotide dissociation stimulator,-like 1
Rtn4r	-1.015725833	0.00015885	0.000305337	288	249	242	103	126	136	1.950328405	1.727805294	1.955906748	1.164124409	0.887284867	0.535453673	Rtn4r	ENSMUSG00000043811	65079	reticulon 4 receptor
Rhou	-1.014827946	2.13E-09	2.17E-08	3558	3760	3184	1058	1777	2335	5.572374413	5.638533695	5.668781041	4.51647298	4.694906587	4.623825742	Rhou	ENSMUSG00000039960	69581	ras homolog family member U
Ubxn1	-1.014142236	5.79E-11	1.43E-09	13477	13742	11679	4071	6092	9007	7.493418498	7.508022387	7.543492622	6.459853998	6.471818536	6.570834265	Ubxn1	ENSMUSG00000071655	225896	UBX domain protein 1
Atp8b5	-1.013585491	0.002969394	0.004532439	90	85	61	28	36	46	0.283870934	0.189077839	-0.016636311	-0.690741717	-0.892645578	-1.001056717	Atp8b5	ENSMUSG00000028457	320571	ATPase, class I, type 8B, member 5
Fam214b	-1.011137716	3.64E-10	5.70E-09	4636	4516	3652	1370	2125	2728	5.95408836	5.902777679	5.866575866	4.889105399	4.952796219	4.848127138	Fam214b	ENSMUSG00000036002	230088	family with sequence similarity 214, member B
Idh1	-1.010479902	2.59E-09	2.55E-08	4149	4096	3480	1166	1901	2775	5.794010235	5.761983016	5.79699376	4.656618237	4.792169847	4.87275922	Idh1	ENSMUSG00000025950	15926	isocitrate dehydrogenase 1 (NADP+), soluble
Fam101a	-1.010140101	0.006429105	0.009316062	63	92	87	25	47	43	-0.2235091	0.301881035	0.489363616	-0.850278119	-0.516910324	-1.095496309	Rflna	ENSMUSG00000037962	73121	refilin A
Sec14l2	-1.01009414	4.03E-09	3.64E-08	2722	2645	2419	828	1320	1658	5.186107183	5.131242091	5.272478814	4.163084624	4.26627463	4.130186414	Sec14l2	ENSMUSG00000003585	67815	SEC14-like lipid binding 2
Vcam1	-1.009619076	1.78E-10	3.29E-09	5769	6217	5268	1877	2742	3826	6.269464162	6.36385709	6.395036743	5.343171417	5.320413105	5.335916246	Vcam1	ENSMUSG00000027962	22329	vascular cell adhesion molecule 1
Gm4262	-1.008342261	0.000721996	0.001217162	149	191	112	51	79	81	1.00450832	1.347109011	0.850514186	0.159339525	0.220359448	-0.202594239	Gm4262	ENSMUSG00000097056	100043147	predicted gene 4262
Errfi1	-1.007969713	2.16E-10	3.81E-09	14884	15121	12655	4950	6579	9149	7.636670661	7.645973689	7.659274911	6.741857976	6.582753823	6.593398323	Errfi1	ENSMUSG00000028967	74155	ERBB receptor feedback inhibitor 1
Tnfrsf9	-1.007944191	1.03E-05	2.60E-05	442	543	427	131	251	324	2.566457966	2.849259296	2.772846307	1.509091749	1.87602263	1.779616618	Tnfrsf9	ENSMUSG00000028965	21942	tumor necrosis factor receptor superfamily, member 9
Snord17	-1.007850748	4.27E-06	1.20E-05	9654	10656	7330	2336	4990	6768	7.012162861	7.141128977	6.871526122	5.658683882	6.183993377	6.158588457	Snord17	ENSMUSG00000077714	100313519	small nucleolar RNA, C/D box 17
Ankrd37	-1.007825371	0.000687774	0.001164117	135	207	135	55	64	110	0.86321387	1.462544618	1.11803805	0.266939256	-0.079306119	0.232687288	Ankrd37	ENSMUSG00000050914	654824	ankyrin repeat domain 37
Arhgap19	-1.007573588	3.21E-09	3.04E-08	3567	3657	2759	1049	1532	2343	5.576018032	5.598473241	5.462148189	4.504155709	4.48100568	4.62875731	Arhgap19	ENSMUSG00000025154	71085	Rho GTPase activating protein 19
Ldb1	-1.007117217	1.51E-11	5.25E-10	13332	13043	11110	4127	6008	8165	7.47781357	7.43271217	7.471440312	6.479561057	6.451790634	6.429262711	Ldb1	ENSMUSG00000025223	16825	LIM domain binding 1
Man2a2	-1.007047624	1.28E-10	2.57E-09	5340	5416	4561	1648	2549	3290	6.158003973	6.164903034	6.187169298	5.15552913	5.215154723	5.118249583	Man2a2	ENSMUSG00000038886	140481	mannosidase 2, alpha 2
Arap1	-1.007033212	7.64E-08	3.83E-07	4131	3667	3377	1251	1964	2181	5.787739247	5.602411728	5.75365987	4.758077053	4.839182528	4.525451627	Arap1	ENSMUSG00000032812	69710	ArfGAP with RhoGAP domain, ankyrin repeat and PH domain 1
Spry2	-1.006697019	2.03E-08	1.30E-07	2391	2360	1807	764	1038	1347	4.999132139	4.96683181	4.851844035	4.047122278	3.919832321	3.830762327	Spry2	ENSMUSG00000022114	24064	sprouty homolog 2 (Drosophila)
H2-K2	-1.006529996	6.97E-07	2.48E-06	1184	1079	933	309	591	683	3.985839921	3.838517274	3.898860886	2.742979976	3.108279232	2.852368885	H2-K2	NA	630499	histocompatibility 2, K region locus 2
Tmem184b	-1.005166931	7.70E-10	9.83E-09	12401	11900	10705	3770	6024	7319	7.373385437	7.300409392	7.417870658	6.34905388	6.455626969	6.271483846	Tmem184b	ENSMUSG00000009035	223693	transmembrane protein 184b
Clmn	-1.005149881	4.26E-07	1.62E-06	780	801	662	219	392	505	3.384386384	3.409193448	3.404377085	2.247560969	2.517180159	2.417766145	Clmn	ENSMUSG00000021097	94040	calmin
Dbn1	-1.005084088	2.09E-10	3.70E-09	8384	8428	7229	2587	4085	5086	6.808698789	6.802763573	6.851511458	5.805884317	5.895352058	5.746485181	Dbn1	ENSMUSG00000034675	56320	drebrin 1
Rgs2	-1.005068221	9.28E-05	0.000187667	270	260	296	102	127	167	1.85757233	1.789909496	2.245533286	1.15013884	0.898602425	0.829069184	Rgs2	ENSMUSG00000026360	19735	regulator of G-protein signaling 2
Nt5dc2	-1.005036255	2.21E-09	2.23E-08	5709	5782	5308	1875	2538	3874	6.254383752	6.259225832	6.405947934	5.3416339	5.208917809	5.353897042	Nt5dc2	ENSMUSG00000071547	70021	5'-nucleotidase domain containing 2
Acad10	-1.005002178	1.45E-05	3.54E-05	383	334	328	100	178	246	2.360288617	2.149932873	2.393210424	1.121754277	1.38249943	1.384171673	Acad10	ENSMUSG00000029456	71985	acyl-Coenzyme A dehydrogenase family, member 10
Efna4	-1.00398745	1.14E-07	5.35E-07	1163	1149	1069	369	506	805	3.960045282	3.929113968	4.094999032	2.998496317	2.88465747	3.089042145	Efna4	ENSMUSG00000028040	13639	ephrin A4
Tbc1d24	-1.003523366	1.55E-10	2.98E-09	6173	5933	4789	1805	2763	3712	6.367097311	6.296412199	6.257530179	5.286761733	5.331416199	5.292291659	Tbc1d24	ENSMUSG00000036473	224617	TBC1 domain family, member 24
Rin1	-1.002685411	9.03E-10	1.11E-08	15284	13903	11681	4639	6632	8533	7.674927834	7.524825318	7.54373964	6.648256128	6.594327809	6.492852622	Rin1	ENSMUSG00000024883	225870	Ras and Rab interactor 1
Wasf1	-1.002624214	9.13E-06	2.35E-05	557	563	431	159	298	300	2.899374754	2.901341035	2.786270289	1.787283754	2.122767142	1.66906254	Wasf1	ENSMUSG00000019831	83767	WAS protein family, member 1
Mfsd11	-1.002365094	8.08E-08	4.01E-07	2153	1869	1750	685	910	1194	4.847937134	4.630483593	4.805625556	3.889796531	3.730154692	3.656999779	Mfsd11	ENSMUSG00000020818	69900	major facilitator superfamily domain containing 11
Kifc1	-1.002286334	6.04E-11	1.46E-09	9236	9526	7637	2973	4204	5690	6.948311389	6.979422658	6.930711915	6.006476184	5.936768908	5.908341868	Kifc1	ENSMUSG00000079553	100502766	kinesin family member C1
Hpcal1	-0.998672785	8.68E-09	6.61E-08	2531	2565	2019	760	1239	1483	5.081190085	5.086951424	5.01181395	4.03955558	4.17498248	3.969399043	Hpcal1	ENSMUSG00000071379	53602	hippocalcin-like 1
Fam105a	-0.998294866	0.000318255	0.000576986	177	162	115	50	75	92	1.251329232	1.110970901	0.888352921	0.131137182	0.146334855	-0.021703581	Fam105a	ENSMUSG00000056069	223433	family with sequence similarity 105, member A
E030011O05Rik	-0.997437184	9.37E-06	2.40E-05	694	646	441	208	294	344	3.216090994	3.099387956	2.819293739	2.173441737	2.103334957	1.865684443	E030011O05Rik	NA	319859	RIKEN cDNA E030011O05 gene
Wrap53	-0.996958113	6.88E-11	1.61E-09	6942	6592	5668	2103	3093	4267	6.536449394	6.448340604	6.500603978	5.507137385	5.494133188	5.493249065	Wrap53	ENSMUSG00000041346	216853	WD repeat containing, antisense to Trp53
Cpne2	-0.996170415	4.06E-10	6.17E-09	6476	6153	5602	2030	3005	3922	6.436216894	6.34893109	6.483708869	5.456184459	5.452504655	5.371656494	Cpne2	ENSMUSG00000034361	234577	copine II
Alpk1	-0.994609706	4.18E-08	2.33E-07	1476	1487	1122	457	616	939	4.303607756	4.300834112	4.16475323	3.306575997	3.167955043	3.310834939	Alpk1	ENSMUSG00000028028	71481	alpha-kinase 1
Depdc7	-0.993175518	3.13E-11	8.95E-10	7143	7228	6086	2235	3351	4525	6.57762194	6.581200227	6.603243016	5.594936764	5.609683048	5.577918816	Depdc7	ENSMUSG00000027173	211896	DEP domain containing 7
Tatdn1	-0.993158924	1.31E-06	4.27E-06	622	552	456	185	264	344	3.058325062	2.872929017	2.867453434	2.004947938	1.948598359	1.865684443	Tatdn1	ENSMUSG00000050891	69694	TatD DNase domain containing 1
Rasgrp3	-0.992854313	0.000905633	0.001502745	152	256	173	53	90	150	1.033065777	1.767634242	1.473776155	0.214142289	0.406281139	0.675489808	Rasgrp3	ENSMUSG00000071042	240168	RAS, guanyl releasing protein 3
Dnajc15	-0.992100458	6.04E-07	2.19E-06	584	611	540	185	276	406	2.967538854	3.019163079	3.110942307	2.004947938	2.012497941	2.103896987	Dnajc15	ENSMUSG00000022013	66148	DnaJ heat shock protein family (Hsp40) member C15
Cyr61	-0.991534554	2.77E-10	4.62E-09	110897	118577	99059	36484	55186	70046	10.53396768	10.6170832	10.62776707	9.62345602	9.650927679	9.529830579	Cyr61	ENSMUSG00000028195	16007	cysteine rich protein 61
Hydin	-0.991293478	0.007369908	0.010582496	82	70	78	25	49	38	0.15121046	-0.087184798	0.333505065	-0.850278119	-0.457986214	-1.268085372	Hydin	ENSMUSG00000059854	244653	HYDIN, axonemal central pair apparatus protein
Alcam	-0.990975079	2.94E-09	2.84E-08	2447	2430	2082	721	1139	1632	5.032517451	5.008982395	5.056123895	3.9636228	4.053673603	4.107402101	Alcam	ENSMUSG00000022636	11658	activated leukocyte cell adhesion molecule
Ptbp2	-0.990436785	7.75E-10	9.89E-09	4491	4666	3587	1458	2019	2769	5.908255184	5.949907493	5.840673208	4.978878501	4.879009014	4.869638017	Ptbp2	ENSMUSG00000028134	56195	polypyrimidine tract binding protein 2
Enthd2	-0.990026734	2.29E-08	1.43E-07	2752	2523	1942	796	1201	1530	5.201914453	5.063142837	4.955741415	4.106268254	4.130078325	4.014371925	Tepsin	ENSMUSG00000025377	78777	TEPSIN, adaptor related protein complex 4 accessory protein
Hilpda	-0.989633741	9.72E-09	7.23E-08	2921	2672	2266	829	1223	1894	5.287864141	5.14588847	5.17825169	4.164824578	4.156245533	4.322032965	Hilpda	ENSMUSG00000043421	69573	hypoxia inducible lipid droplet associated
Scn2a1	-0.989314835	0.004254024	0.006316718	110	118	75	45	38	60	0.570315048	0.657296067	0.277571665	-0.018789082	-0.816646122	-0.627326521	Scn2a	ENSMUSG00000075318	110876	sodium channel, voltage-gated, type II, alpha
Synm	-0.988595065	1.49E-09	1.64E-08	8677	7954	6330	2452	3861	5025	6.858250231	6.719264755	6.65994606	5.728583403	5.814010501	5.729081947	Synm	ENSMUSG00000030554	233335	synemin, intermediate filament protein
Zscan2	-0.988445926	5.07E-05	0.000108588	507	451	463	195	194	303	2.763953915	2.582014285	2.889389364	2.080635041	1.506030693	1.683354053	Zscan2	ENSMUSG00000038797	22691	zinc finger and SCAN domain containing 2
6530402F18Rik	-0.988319544	0.004105512	0.006108366	210	119	136	35	85	122	1.496616372	0.669361628	1.128615897	-0.375441787	0.324727937	0.380349115	6530402F18Rik	ENSMUSG00000079499	76220	RIKEN cDNA 6530402F18 gene
Ankrd42	-0.987781953	1.48E-06	4.76E-06	861	914	680	310	363	517	3.526740937	3.599346957	3.443029401	2.747631482	2.4065819	2.451558053	Ankrd42	ENSMUSG00000041343	73845	ankyrin repeat domain 42
Mcc	-0.986793101	6.92E-08	3.52E-07	1705	1477	1257	462	756	989	4.511547442	4.291106328	4.328542536	3.322252276	3.46298879	3.385575936	Mcc	ENSMUSG00000071856	328949	mutated in colorectal cancers
Mier1	-0.986472439	1.70E-10	3.16E-09	9945	10711	8164	3064	4814	6449	7.055002761	7.148555424	7.026971234	6.049963554	6.132200004	6.088948543	Mier1	ENSMUSG00000028522	71148	MEIR1 treanscription regulator
Irs2	-0.986469809	4.72E-08	2.57E-07	6995	6161	4809	2072	2979	3672	6.547420414	6.350805307	6.263541556	5.485719277	5.439971871	5.276666702	Irs2	ENSMUSG00000038894	384783	insulin receptor substrate 2
Polk	-0.986036672	3.96E-11	1.06E-09	7227	7269	5912	2198	3348	4620	6.59448622	6.589359419	6.561401153	5.570860453	5.608391265	5.607885057	Polk	ENSMUSG00000021668	27015	polymerase (DNA directed), kappa
Midn	-0.985196806	2.36E-09	2.36E-08	13364	12468	10534	4093	6288	7480	7.48127196	7.367671958	7.394641172	6.467628192	6.517496618	6.302869863	Midn	ENSMUSG00000035621	59090	midnolin
Meis3	-0.983989188	1.22E-07	5.69E-07	1175	1357	1167	424	593	812	3.9748415	4.168949749	4.221441074	3.198607227	3.113145195	3.101512336	Meis3	ENSMUSG00000041420	17537	Meis homeobox 3
Slc43a2	-0.983140026	1.32E-06	4.32E-06	864	902	719	265	468	496	3.53175284	3.58030271	3.523384254	2.521873473	2.772253814	2.391892438	Slc43a2	ENSMUSG00000038178	215113	solute carrier family 43, member 2
Ch25h	-0.983017626	4.95E-06	1.37E-05	438	518	411	162	202	312	2.553374048	2.781396381	2.717865307	1.814140893	1.564043672	1.725398293	Ch25h	ENSMUSG00000050370	12642	cholesterol 25-hydroxylase
Lrp11	-0.982973133	2.07E-07	8.85E-07	1410	1212	1145	449	596	804	4.237658752	4.006054965	4.19400521	3.281134165	3.120413504	3.087251857	Lrp11	ENSMUSG00000019796	237253	low density lipoprotein receptor-related protein 11
Tes	-0.982564381	3.71E-09	3.42E-08	3492	3700	3191	1068	1778	2393	5.545369598	5.615332972	5.67194843	4.530036619	4.695717785	4.659203451	Tes	ENSMUSG00000029552	21753	testis derived transcript
Mapkbp1	-0.981919839	6.28E-09	5.15E-08	8601	7773	6239	2451	3922	4791	6.845559867	6.686060236	6.639058324	5.727995065	5.836619819	5.660304027	Mapkbp1	ENSMUSG00000033902	26390	mitogen-activated protein kinase binding protein 1
Pias3	-0.981663503	4.19E-09	3.75E-08	4108	4017	3302	1313	1946	2355	5.779686444	5.733893186	5.721266435	4.827826433	4.825905928	4.636123196	Pias3	ENSMUSG00000028101	229615	protein inhibitor of activated STAT 3
Gm15417	-0.979219325	1.47E-06	4.73E-06	687	741	504	217	322	406	3.201487891	3.297020873	3.011575986	2.234364899	2.23416489	2.103896987	Gm15417	ENSMUSG00000074466	545539	predicted gene 15417
Meis1	-0.978949296	2.95E-05	6.67E-05	373	358	295	94	190	243	2.322226807	2.249734892	2.240665708	1.033087675	1.476125289	1.366566556	Meis1	ENSMUSG00000020160	17268	Meis homeobox 1
Ppp2r5d	-0.978469232	1.05E-11	3.98E-10	23712	24023	20241	7537	10935	15562	8.308487394	8.313798563	8.336809992	7.348354148	7.31568169	7.359652415	Ppp2r5d	ENSMUSG00000059409	21770	protein phosphatase 2, regulatory subunit B', delta
Tmem179b	-0.978395449	8.70E-08	4.28E-07	962	979	816	303	476	591	3.686577976	3.698349432	3.705749848	2.714751523	2.796656463	2.644082923	Tmem179b	ENSMUSG00000003680	67706	transmembrane protein 179B
Col27a1	-0.977825667	2.20E-06	6.71E-06	1452	1411	1012	498	565	819	4.279973633	4.225203432	4.016013984	3.43035711	3.043481278	3.113875662	Col27a1	ENSMUSG00000045672	373864	collagen, type XXVII, alpha 1
Rbm20	-0.977033631	0.016489449	0.022431529	83	56	72	15	39	61	0.168475623	-0.403682894	0.219381952	-1.56283076	-0.780096843	-0.603998608	Rbm20	ENSMUSG00000043639	73713	RNA binding motif protein 20
Gm15787	-0.973778238	0.00365974	0.005496118	121	134	70	28	54	82	0.706563853	0.839190482	0.179242596	-0.690741717	-0.32041632	-0.185179745	Gm15787	ENSMUSG00000086247	100504007	predicted gene 15787
Letmd1	-0.973767248	3.90E-10	6.01E-09	3902	3846	3331	1217	1781	2589	5.705483726	5.671150601	5.733878288	4.718345581	4.698148646	4.772716643	Letmd1	ENSMUSG00000037353	68614	LETM1 domain containing 1
R3hcc1	-0.973495471	2.71E-09	2.64E-08	3629	3728	2855	1094	1775	2234	5.600871536	5.626206423	5.511477853	4.564716638	4.693282822	4.560069941	R3hcc1	ENSMUSG00000034194	71843	R3H domain and coiled-coil containing 1
Prodh	-0.972356992	0.000112191	0.000222573	216	208	196	62	98	161	1.53705669	1.469461643	1.65299204	0.437852446	0.527875527	0.776711422	Prodh	ENSMUSG00000003526	19125	proline dehydrogenase
Mapk11	-0.970928546	3.30E-07	1.30E-06	1135	1168	992	411	490	736	3.924918954	3.952753568	3.987242247	3.15375193	2.838392402	2.959984799	Mapk11	ENSMUSG00000053137	19094	mitogen-activated protein kinase 11
Ssc5d	-0.969670738	2.49E-06	7.48E-06	666	650	501	186	338	389	3.156770183	3.1082788	3.002978066	2.012697849	2.30392133	2.042395655	Ssc5d	ENSMUSG00000035279	269855	scavenger receptor cysteine rich family, 5 domains
Ptgr1	-0.969036656	8.97E-09	6.78E-08	2118	2313	1960	677	1088	1477	4.824303158	4.937823527	4.969045806	3.872864706	3.987642233	3.963555584	Ptgr1	ENSMUSG00000028378	67103	prostaglandin reductase 1
Hsd17b11	-0.968455758	5.14E-06	1.42E-05	588	577	397	178	263	325	2.977368825	2.936710904	2.667975718	1.9495006	1.943143408	1.784044164	Hsd17b11	ENSMUSG00000029311	114664	hydroxysteroid (17-beta) dehydrogenase 11
H2-DMa	-0.968080398	1.66E-05	3.98E-05	460	563	510	175	277	308	2.62391013	2.901341035	3.028619615	1.925069198	2.017697322	1.706863066	H2-DMa	ENSMUSG00000037649	14998	histocompatibility 2, class II, locus DMa
Bdkrb2	-0.968013383	0.001197114	0.001948636	180	245	194	49	120	163	1.275433357	1.70454227	1.638262189	0.102372519	0.817449168	0.794375981	Bdkrb2	ENSMUSG00000021070	12062	bradykinin receptor, beta 2
Plcd3	-0.967741303	2.33E-10	4.04E-09	4795	4692	4088	1532	2182	3128	6.002727652	5.957922363	6.029246852	5.050272701	4.9909672	5.045433056	Plcd3	ENSMUSG00000020937	72469	phospholipase C, delta 3
Spc25	-0.966820464	2.07E-09	2.13E-08	7620	8018	6634	2385	3497	5537	6.670869391	6.730825058	6.727610289	5.688624543	5.671191643	5.869027162	Spc25	ENSMUSG00000005233	66442	SPC25, NDC80 kinetochore complex component, homolog (S. cerevisiae)
Ssmem1	-0.966349617	0.002723645	0.004189129	110	102	79	25	53	74	0.570315048	0.449114368	0.351677797	-0.850278119	-0.346900822	-0.330762699	Ssmem1	ENSMUSG00000029784	75647	serine-rich single-pass membrane protein 1
Tmem203	-0.966130754	1.27E-07	5.89E-07	1498	1540	1319	449	693	1114	4.324937423	4.351324046	4.397954525	3.281134165	3.337626777	3.557062789	Tmem203	ENSMUSG00000078201	227615	transmembrane protein 203
Gm16062	-0.965985781	0.000737295	0.001240313	173	124	138	51	73	89	1.218550853	0.728220705	1.149541726	0.159339525	0.107847728	-0.06883131	Gm16062	ENSMUSG00000087249	100504104	predicted gene 16062
Stoml1	-0.964842764	7.33E-09	5.82E-08	1876	1833	1608	604	901	1161	4.649353666	4.602440052	4.683602723	3.708426406	3.715830672	3.616611072	Stoml1	ENSMUSG00000032333	69106	stomatin-like 1
Ptpn22	-0.964473195	5.49E-08	2.92E-07	1223	1269	1017	363	600	828	4.032554013	4.072300068	4.023118148	2.974887416	3.13004797	3.129617257	Ptpn22	ENSMUSG00000027843	19260	protein tyrosine phosphatase, non-receptor type 22 (lymphoid)
Arl4c	-0.963145265	5.25E-11	1.31E-09	14223	13501	11707	4354	6436	9212	7.571138948	7.482498678	7.546947032	6.556797058	6.551054585	6.60329722	Arl4c	ENSMUSG00000049866	320982	ADP-ribosylation factor-like 4C
Etv4	-0.963137392	4.48E-10	6.60E-09	4847	4661	4047	1539	2296	2970	6.018285492	5.948361054	6.014707682	5.056846823	5.064406756	4.970688473	Etv4	ENSMUSG00000017724	18612	ets variant 4
Mmd	-0.963014328	5.10E-09	4.37E-08	5925	5781	5208	2030	2584	3905	6.307951061	6.258976342	6.378513651	5.456184459	5.23482195	5.365391661	Mmd	ENSMUSG00000003948	67468	monocyte to macrophage differentiation-associated
Arhgap28	-0.962644018	4.80E-08	2.61E-07	2736	2535	2093	767	1350	1610	5.193505468	5.069985478	5.063722902	4.05277137	4.298672452	4.087837972	Arhgap28	ENSMUSG00000024043	268970	Rho GTPase activating protein 28
Gab1	-0.961920653	8.79E-08	4.31E-07	2386	2148	1765	681	1145	1334	4.996113394	4.831103593	4.817932592	3.881355458	4.06124699	3.816785172	Gab1	ENSMUSG00000031714	14388	growth factor receptor bound protein 2-associated protein 1
Cic	-0.961871812	1.51E-08	1.03E-07	14863	13825	11511	4335	7430	8455	7.634633854	7.516709204	7.522590645	6.550488597	6.758223243	6.479606427	Cic	ENSMUSG00000005442	71722	capicua transcriptional repressor
Hddc3	-0.961623341	1.07E-05	2.69E-05	381	411	353	125	172	294	2.352756164	2.448358163	2.498906601	1.441798446	1.33330481	1.64004765	Hddc3	ENSMUSG00000030532	68695	HD domain containing 3
Bin1	-0.95944889	9.66E-10	1.17E-08	4964	4637	4205	1595	2222	3159	6.052689076	5.940914985	6.069948729	5.108388408	5.017163319	5.059654393	Bin1	ENSMUSG00000024381	30948	bridging integrator 1
Amdhd2	-0.959082663	2.16E-07	9.19E-07	821	910	736	284	388	576	3.458196514	3.593026766	3.5570571	2.621533403	2.502420047	2.607078942	Amdhd2	ENSMUSG00000036820	245847	amidohydrolase domain containing 2
Lpcat4	-0.957502872	6.81E-08	3.48E-07	1294	1409	1139	402	683	877	4.113898544	4.223158611	4.186431255	3.121860569	3.316686671	3.212432553	Lpcat4	ENSMUSG00000027134	99010	lysophosphatidylcholine acyltransferase 4
Hcn3	-0.956945662	0.001325951	0.002140477	220	207	174	90	104	97	1.563400553	1.462544618	1.482049036	0.970796747	0.61278549	0.053574984	Hcn3	ENSMUSG00000028051	15168	hyperpolarization-activated, cyclic nucleotide-gated K+ 3
Rnu11	-0.95675488	1.40E-05	3.42E-05	415	512	344	143	190	311	2.475747907	2.76462301	2.461741793	1.634936016	1.476125289	1.720786764	Rnu11	NA	353373	U11 small nuclear RNA
Sec24c	-0.956171394	1.63E-10	3.05E-09	7857	7837	6462	2574	3709	4855	6.715050889	6.697888592	6.689717173	5.798618166	5.756081136	5.67944317	Sec24c	ENSMUSG00000039367	218811	Sec24 related gene family, member C (S. cerevisiae)
Prkar2b	-0.955256282	4.03E-09	3.64E-08	2835	3055	2269	938	1328	1840	5.244766424	5.339068305	5.18015969	4.342907679	4.274985435	4.280332458	Prkar2b	ENSMUSG00000002997	19088	protein kinase, cAMP dependent regulatory, type II beta
Rnf128	-0.954634552	2.54E-07	1.05E-06	1124	1093	1081	387	530	755	3.910881891	3.857097469	4.111090395	3.06708984	2.951386837	2.996689424	Rnf128	ENSMUSG00000031438	66889	ring finger protein 128
Ptk7	-0.953977503	1.10E-10	2.30E-09	26370	25152	22995	8361	12488	17098	8.4617611	8.38005247	8.520842034	7.49802687	7.507254922	7.495441305	Ptk7	ENSMUSG00000023972	71461	PTK7 protein tyrosine kinase 7
Odf2	-0.953974084	1.35E-09	1.51E-08	8653	8786	6989	2949	4001	5270	6.854254794	6.862772282	6.802807506	5.994785136	5.865383834	5.797743359	Odf2	ENSMUSG00000026790	18286	outer dense fiber of sperm tails 2
Nceh1	-0.953880528	7.35E-10	9.48E-09	4060	4119	3452	1362	1847	2685	5.762734398	5.770059319	5.785341907	4.88066027	4.750616797	4.825216972	Nceh1	ENSMUSG00000027698	320024	neutral cholesterol ester hydrolase 1
Nxpe3	-0.952481307	0.000117254	0.000231745	731	762	499	243	391	342	3.290915155	3.337280889	2.997217519	2.397160306	2.513504264	1.857305073	Nxpe3	ENSMUSG00000075033	385658	neurexophilin and PC-esterase domain family, member 3
Aprt	-0.951821051	1.19E-10	2.42E-09	25953	26974	23633	8509	13169	17360	8.438765777	8.48094467	8.560323109	7.523338988	7.583852454	7.51737896	Aprt	ENSMUSG00000006589	11821	adenine phosphoribosyl transferase
Zfp248	-0.950437296	8.30E-09	6.40E-08	2251	2273	1762	674	1097	1436	4.912123903	4.912667707	4.81547957	3.866463688	3.999516608	3.922978996	Zfp248	ENSMUSG00000030145	72720	zinc finger protein 248
Emx2	-0.949171806	8.34E-05	0.000170393	231	283	190	76	111	172	1.633459792	1.911718389	1.608343487	0.728795221	0.705916617	0.871294411	Emx2	ENSMUSG00000043969	13797	empty spiracles homeobox 2
Ccdc28b	-0.948225252	0.000239862	0.000444595	167	182	162	51	90	125	1.167943145	1.277872952	1.379498637	0.159339525	0.406281139	0.415018313	Ccdc28b	ENSMUSG00000028795	66264	coiled coil domain containing 28B
Tmem144	-0.948146123	0.000275836	0.000506221	239	246	172	68	94	185	1.682356535	1.710393287	1.465455561	0.569784016	0.468358994	0.975624005	Tmem144	ENSMUSG00000027956	70652	transmembrane protein 144
Sfi1	-0.948034219	2.15E-06	6.58E-06	871	870	701	297	441	479	3.543380012	3.528253668	3.486852672	2.685959697	2.686707509	2.341716488	Sfi1	ENSMUSG00000023764	78887	Sfi1 homolog, spindle assembly associated (yeast)
C1ql1	-0.947728303	0.002849952	0.004369076	115	110	147	49	55	80	0.633845439	0.556957056	1.240124162	0.102372519	-0.29440926	-0.220221512	C1ql1	ENSMUSG00000045532	23829	complement component 1, q subcomponent-like 1
Klhl26	-0.947486772	4.67E-11	1.21E-09	15088	14476	12296	4808	7033	9422	7.656308554	7.583087706	7.617759432	6.699872	6.679011932	6.635811445	Klhl26	ENSMUSG00000055707	234378	kelch-like 26
Fam35a	-0.946037	5.95E-09	4.96E-08	2433	2450	2183	770	1170	1717	5.024243272	5.020802637	5.124437469	4.058398429	4.092381701	4.180592248	Fam35a	ENSMUSG00000041471	75698	family with sequence similarity 35, member A
S100a6	-0.945867302	2.25E-09	2.27E-08	141406	154069	128165	44833	71753	103338	10.88458769	10.9948326	10.9994065	9.920748313	10.02965863	10.09081795	S100a6	ENSMUSG00000001025	20200	S100 calcium binding protein A6 (calcyclin)
Efhc1	-0.945685695	0.000212437	0.000397659	215	199	142	57	94	133	1.530394869	1.405981063	1.190504255	0.317872081	0.468358994	0.503592028	Efhc1	ENSMUSG00000041809	71877	EF-hand domain (C-terminal) containing 1
Cenpm	-0.945598706	1.51E-09	1.66E-08	2587	2685	2268	846	1292	1715	5.112749533	5.152887749	5.17952397	4.19408719	4.235365841	4.178912102	Cenpm	ENSMUSG00000068101	66570	centromere protein M
C920025E04Rik	-0.945143615	1.07E-06	3.59E-06	892	733	727	261	392	552	3.577709639	3.281383275	3.539328243	2.499985582	2.517180159	2.545824572	H2-T-ps	NA	667803	histocompatibility 2, T region locus, pseudogene
Atf3	-0.942927325	1.58E-07	7.05E-07	15352	17509	16690	6006	7919	11297	7.681331844	7.857502876	8.058526859	7.020800274	6.850167607	6.897611723	Atf3	ENSMUSG00000026628	11910	activating transcription factor 3
Map3k11	-0.942899924	1.27E-10	2.56E-09	7506	7361	6353	2481	3491	4853	6.649125737	6.607501626	6.665177846	5.745541643	5.668714894	5.678848899	Map3k11	ENSMUSG00000004054	26403	mitogen-activated protein kinase kinase kinase 11
2810403D21Rik	-0.942305108	0.001310603	0.002118364	123	131	156	49	67	90	0.730010999	0.806786486	1.325353644	0.102372519	-0.014186317	-0.052950396	2810403D21Rik	ENSMUSG00000086629	69964	RIKEN cDNA 2810403D21 gene
Rap2a	-0.942005006	4.36E-10	6.46E-09	9653	9502	8075	2887	4721	6520	7.012013429	6.975783726	7.011159043	5.96413732	6.104062099	6.104741761	Rap2a	ENSMUSG00000051615	76108	RAS related protein 2a
Rnf43	-0.941548029	0.011138518	0.015553167	110	100	98	45	31	90	0.570315048	0.420845284	0.659491141	-0.018789082	-1.102253137	-0.052950396	Rnf43	ENSMUSG00000034177	207742	ring finger protein 43
Gcdh	-0.941442155	4.31E-10	6.40E-09	8644	9130	7691	2793	4186	6236	6.852753648	6.918174011	6.940875904	5.916392829	5.930579988	6.04050428	Gcdh	ENSMUSG00000003809	270076	glutaryl-Coenzyme A dehydrogenase
Cd81	-0.94138782	3.75E-10	5.81E-09	26220	27201	24667	8852	13009	18357	8.453531547	8.493034406	8.622100322	7.580348532	7.566218036	7.597936245	Cd81	ENSMUSG00000037706	12520	CD81 antigen
Rhod	-0.941020382	4.15E-10	6.25E-09	7300	7416	6573	2329	3593	5112	6.60898367	6.618239541	6.714285056	5.654355466	5.710252041	5.753839615	Rhod	ENSMUSG00000041845	11854	ras homolog family member D
Tgfbi	-0.940568673	1.62E-07	7.18E-07	1777	1790	1649	636	911	1088	4.571182995	4.568213111	4.719906896	3.782825774	3.731737506	3.523033703	Tgfbi	ENSMUSG00000035493	21810	transforming growth factor, beta induced
Cobll1	-0.940093627	8.53E-08	4.20E-07	2140	2008	1614	645	1057	1224	4.839203932	4.733919043	4.688972932	3.803077402	3.945976925	3.692760698	Cobll1	ENSMUSG00000034903	319876	Cobl-like 1
Acox3	-0.939821593	3.22E-09	3.04E-08	3701	3581	2974	1243	1663	2297	5.629206404	5.568184106	5.570373786	4.748826432	4.599305291	4.600167794	Acox3	ENSMUSG00000029098	80911	acyl-Coenzyme A oxidase 3, pristanoyl
Ppp1r14b	-0.939616011	1.46E-10	2.85E-09	20447	20210	16365	6641	9786	12549	8.094769544	8.064463704	8.030158033	7.165781214	7.155534755	7.049227281	Ppp1r14b	ENSMUSG00000056612	18938	protein phosphatase 1, regulatory (inhibitor) subunit 14B
Cacnb4	-0.939019412	0.003908469	0.005836444	92	86	93	25	53	65	0.315213967	0.205742705	0.584637196	-0.850278119	-0.346900822	-0.514285428	Cacnb4	ENSMUSG00000017412	12298	calcium channel, voltage-dependent, beta 4 subunit
Foxo3	-0.938487637	4.76E-09	4.15E-08	4583	4276	3417	1458	2043	2716	5.937503901	5.824013263	5.770643494	4.978878501	4.89604913	4.841770116	Foxo3	ENSMUSG00000048756	56484	forkhead box O3
Cdkn2a	-0.938072489	3.44E-10	5.45E-09	8678	9030	7824	2976	4382	5687	6.858416468	6.902287014	6.965608248	6.007930926	5.996582138	5.907581199	Cdkn2a	ENSMUSG00000044303	12578	cyclin-dependent kinase inhibitor 2A
Lama5	-0.937718623	1.15E-08	8.33E-08	17081	15134	12560	5380	7622	9586	7.835287565	7.647213399	7.648404634	6.862020326	6.795025874	6.660703529	Lama5	ENSMUSG00000015647	16776	laminin, alpha 5
Pir	-0.937513153	0.000541125	0.000935651	275	348	261	78	198	194	1.883941764	2.208986375	2.064565079	0.765952951	1.535328762	1.043672046	Pira1	ENSMUSG00000081665	18722	paired-Ig-like receptor A1
Scarna17	-0.937419151	0.000851563	0.001418972	228	253	139	78	83	148	1.614687637	1.750699153	1.15989191	0.765952951	0.2907705	0.656297796	Scarna17	NA	100217466	small Cajal body-specific RNA 17
Tmem141	-0.936925344	6.03E-07	2.19E-06	1169	1060	1064	367	602	722	3.96746236	3.812912341	4.088240963	2.990669532	3.134841182	2.932328917	Tmem141	ENSMUSG00000026939	51875	transmembrane protein 141
Zadh2	-0.936855016	2.28E-08	1.42E-07	2846	2882	2461	952	1487	1728	5.250351262	5.254996638	5.297303658	4.364266485	4.43802179	4.189798235	Zadh2	ENSMUSG00000049090	225791	zinc binding alcohol dehydrogenase, domain containing 2
Gpn3	-0.935608209	6.88E-10	9.08E-09	6682	6985	5777	2111	3231	4806	6.481386598	6.531871279	6.528080446	5.512613406	5.557087693	5.664812598	Gpn3	ENSMUSG00000029464	68080	GPN-loop GTPase 3
Dyrk1b	-0.933541184	7.50E-06	1.98E-05	844	816	740	332	370	505	3.498006498	3.435924911	3.564867197	2.84634438	2.434064528	2.417766145	Dyrk1b	ENSMUSG00000002409	13549	dual-specificity tyrosine-(Y)-phosphorylation regulated kinase 1b
1500012F01Rik	-0.933397763	1.47E-09	1.62E-08	3525	3581	2966	1084	1754	2404	5.55893519	5.568184106	5.566488899	4.551476641	4.676122025	4.665816241	Zfas1	NA	68949	zinc finger, NFX1-type containing 1, antisense RNA 1
4833418N02Rik	-0.933305514	1.87E-05	4.43E-05	819	696	518	266	312	433	3.454682295	3.206769381	3.051035696	2.52729395	2.188789773	2.196487107	4833418N02Rik	ENSMUSG00000085287	74597	RIKEN cDNA 4833418N02 gene
Prosc	-0.93321686	7.99E-11	1.76E-09	18492	18751	15619	5738	9130	12634	7.949789549	7.956367874	7.962850262	6.954951135	7.055440657	7.058965313	Prosc	ENSMUSG00000031485	114863	proline synthetase co-transcribed
Dixdc1	-0.932896766	6.80E-09	5.49E-08	2043	2199	1744	705	1007	1348	4.772316316	4.864940513	4.800673194	3.931276596	3.876131226	3.831831904	Dixdc1	ENSMUSG00000032064	330938	DIX domain containing 1
Yipf3	-0.932797035	2.29E-08	1.43E-07	5193	4668	3749	1585	2395	2927	6.117740577	5.950525605	5.904385843	5.099318571	5.125284464	4.949657885	Yipf3	ENSMUSG00000071074	28064	Yip1 domain family, member 3
Prkag1	-0.931754725	7.29E-11	1.65E-09	10695	11213	9379	3478	5317	7455	7.159885165	7.214628099	7.227108813	6.232768386	6.2755487	6.298040816	Prkag1	ENSMUSG00000067713	19082	protein kinase, AMP-activated, gamma 1 non-catalytic subunit
Esam	-0.931503901	0.008337662	0.011875193	94	62	79	22	42	59	0.345890516	-0.259466372	0.351677797	-1.029675411	-0.675696506	-0.651037847	Esam	ENSMUSG00000001946	69524	endothelial cell-specific adhesion molecule
Bcl9l	-0.931503092	2.47E-07	1.03E-06	5305	5269	4320	1623	2950	3092	6.148518875	6.12521244	6.108866124	5.13348474	5.425863341	5.028740084	Bcl9l	ENSMUSG00000063382	80288	B cell CLL/lymphoma 9-like
Gcat	-0.930221403	1.42E-08	9.80E-08	2863	3057	2704	1050	1403	1974	5.258940075	5.340012146	5.433107336	4.5055295	4.354188732	4.381677117	Gcat	ENSMUSG00000006378	26912	glycine C-acetyltransferase (2-amino-3-ketobutyrate-coenzyme A ligase)
Gm14057	-0.929907451	0.001612208	0.002564352	126	109	124	46	61	73	0.764482333	0.543909406	0.996255741	0.012468547	-0.147504793	-0.350038627	Gm14057	NA	100043766	Ppp1r14c pseudogene
2410006H16Rik	-0.929711776	1.33E-10	2.65E-09	5295	5253	4386	1683	2561	3483	6.145797354	6.120825739	6.130736157	5.185836111	5.221928018	5.200459791	2410006H16Rik	ENSMUSG00000086841	69221	RIKEN cDNA 2410006H16 gene
Suv420h2	-0.9281361	3.26E-07	1.29E-06	1145	1093	883	342	582	684	3.937562476	3.857097469	3.819475003	2.889074175	3.086176988	2.854475484	Kmt5c	ENSMUSG00000059851	232811	lysine methyltransferase 5C
Syngr3	-0.92802201	1.42E-07	6.46E-07	1109	1046	913	331	553	713	3.891517641	3.793750436	3.867628748	2.84200096	3.012563805	2.91426603	Syngr3	ENSMUSG00000007021	20974	synaptogyrin 3
Ercc5	-0.926257863	6.36E-10	8.57E-09	10255	10285	7845	3345	4797	6393	7.09928232	7.090010018	6.969474886	6.176527494	6.127097337	6.076368803	Ercc5	ENSMUSG00000026048	22592	excision repair cross-complementing rodent repair deficiency, complementation group 5
Plxnc1	-0.925716768	0.00469599	0.006937209	107	77	72	25	46	62	0.53080907	0.048339103	0.219381952	-0.850278119	-0.547300154	-0.581041906	Plxnc1	ENSMUSG00000074785	54712	plexin C1
1110012L19Rik	-0.924544299	9.00E-10	1.11E-08	7211	7422	6445	2281	3653	5150	6.591289138	6.619406129	6.685917304	5.624319832	5.734138433	5.76452141	1110012L19Rik	ENSMUSG00000045237	68618	RIKEN cDNA 1110012L19 gene
[truncated: 10,699 more rows]
