# Supplementary material for: The transcription factors TFE3 and TFEB amplify p53 dependent transcriptional programs in response to DNA damage
Source: eLife journal article supplement (doi:10.7554/elife.40856), 2018-12-06
Supplement: supp [file elife-40856-supp-v1.zip › elife_poa_e40856_Supplementary_File_2.csv]

Supplementary Table 2	chr	start	end	strand	genesymbol	log2FC	pval	qval	RAW WT Etoposide	RAW WT Etoposide	RAW WT Etoposide	RAW TFEB/TFE3 Etoposide	RAW TFEB/TFE3 Etoposide	RAW TFEB/TFE3 Etoposide	RAW WT Etoposide normalized	RAW WT Etoposide normalized	RAW WT Etoposide normalized	RAW TFEB/TFE3 Etoposide normalized	RAW TFEB/TFE3 Etoposide normalized	RAW TFEB/TFE3 Etoposide normalized	symbol	ensmbl	entrez	name
ENSMUSG00000003617.16	chr3	19957054	20009145	+	Cp	-4.167965461	4.18E-13	2.06E-09	4478	3931	3947	229	233	272	6.263396672	6.245706588	6.286625575	2.068977452	2.040219545	2.178248379	Cp	ENSMUSG00000003617	12870	ceruloplasmin
ENSMUSG00000004105.8	chr2	33216069	33247717	+	Angptl2	5.523785849	1.16E-12	2.06E-09	109	94	112	5123	5199	5174	0.90938384	0.867084873	1.153683215	6.549541084	6.517097986	6.425339709	Angptl2	ENSMUSG00000004105	26360	angiopoietin-like 2
ENSMUSG00000021457.14	chr13	52583173	52648792	+	Syk	-3.01910009	8.67E-13	2.06E-09	5811	5277	5042	688	667	772	6.63929165	6.670481407	6.639825488	3.653939953	3.555564832	3.681527082	Syk	ENSMUSG00000021457	20963	spleen tyrosine kinase
ENSMUSG00000028678.13	chr4	117159639	117182639	-	Kif2c	-3.83781925	1.14E-12	2.06E-09	3828	3298	3082	240	257	263	6.037160323	5.992436838	5.929787204	2.136520192	2.181369428	2.129795111	Kif2c	ENSMUSG00000028678	73804	kinesin family member 2C
ENSMUSG00000029762.6	chr6	34354119	34368463	+	Akr1b8	3.081044497	7.50E-13	2.06E-09	2725	2593	2301	21450	21843	25751	5.546901986	5.645527103	5.508260751	8.615350765	8.587857224	8.740504809	Akr1b8	ENSMUSG00000029762	14187	aldo-keto reductase family 1, member B8
ENSMUSG00000031004.8	chr7	135689784	135716361	-	Mki67	-3.226369236	2.11E-13	2.06E-09	44891	36617	37643	4211	4384	5000	9.588751463	9.465088125	9.540015176	6.266745559	6.27113742	6.375992601	Mki67	ENSMUSG00000031004	17345	antigen identified by monoclonal antibody Ki 67
ENSMUSG00000036768.5	chr9	122951081	123018725	+	Kif15	-2.943854696	1.21E-12	2.06E-09	4829	4124	3999	563	599	633	6.372254899	6.31484597	6.305505961	3.364898909	3.400556749	3.395336768	Kif15	ENSMUSG00000036768	209737	kinesin family member 15
ENSMUSG00000044783.16	chr1	88262471	88277633	-	Hjurp	-2.407980018	1.21E-12	2.06E-09	11214	9880	9552	2004	2027	2133	7.587674459	7.575210784	7.561564662	5.195653811	5.158427005	5.147142354	Hjurp	ENSMUSG00000044783	381280	Holliday junction recognition protein
ENSMUSG00000048612.15	chr19	37899036	38043577	-	Myof	2.944145956	3.13E-13	2.06E-09	1330	1206	1204	9951	10149	10667	4.512349576	4.541454649	4.574120703	7.507325394	7.482061842	7.469070449	Myof	ENSMUSG00000048612	226101	myoferlin
ENSMUSG00000026683.14	chr1	169497934	169531464	-	Nuf2	-4.079107484	1.55E-12	2.09E-09	3121	2633	2568	164	179	181	5.742620531	5.667608193	5.666612383	1.588570882	1.660780839	1.591961697	Nuf2	ENSMUSG00000026683	66977	NUF2, NDC80 kinetochore complex component
ENSMUSG00000038943.16	chr7	80294450	80316259	+	Prc1	-2.978931169	1.77E-12	2.09E-09	6525	5523	5088	749	762	802	6.806469514	6.736209463	6.652926747	3.776411777	3.747534333	3.736493541	Prc1	ENSMUSG00000038943	233406	protein regulator of cytokinesis 1
ENSMUSG00000041431.16	chr13	100778650	100786570	-	Ccnb1	-3.351831967	1.43E-12	2.09E-09	3934	3511	3322	348	397	381	6.076561374	6.082714169	6.037955508	2.671641954	2.807751856	2.663675206	Ccnb1	ENSMUSG00000041431	268697	cyclin B1
ENSMUSG00000046805.9	chr19	12460779	12465284	+	Mpeg1	-4.07230242	1.69E-12	2.09E-09	3515	3129	2967	182	192	237	5.91411096	5.91655891	5.874934339	1.738379762	1.761655441	1.979919662	Mpeg1	ENSMUSG00000046805	17476	macrophage expressed gene 1
ENSMUSG00000002055.9	chr11	78301529	78322457	+	Spag5	-2.706087607	1.91E-12	2.09E-09	4564	4155	4034	686	674	728	6.2908379	6.32564881	6.318076199	3.649743019	3.570615439	3.596921121	Spag5	ENSMUSG00000002055	54141	sperm associated antigen 5
ENSMUSG00000003779.15	chr18	34624624	34633265	+	Kif20a	-2.314010438	2.23E-12	2.11E-09	13014	11459	10648	2373	2514	2648	7.802429047	7.789098926	7.718264623	5.439427443	5.468996644	5.459095752	Kif20a	ENSMUSG00000003779	19348	kinesin family member 20A
ENSMUSG00000020914.17	chr11	98992943	99024189	-	Top2a	-2.465554864	2.61E-12	2.11E-09	28244	23744	23149	4370	4870	5295	8.920279122	8.840148205	8.838595437	6.320209732	6.422794976	6.458687153	Top2a	ENSMUSG00000020914	21973	topoisomerase (DNA) II alpha
ENSMUSG00000024989.14	chr19	38055025	38074425	+	Cep55	-3.765766732	2.52E-12	2.11E-09	3509	2986	2993	227	230	289	5.911646569	5.849082455	5.887519579	2.056349844	2.021563746	2.265555497	Cep55	ENSMUSG00000024989	74107	centrosomal protein 55
ENSMUSG00000026622.15	chr1	191821444	191833050	+	Nek2	-3.880714829	2.61E-12	2.11E-09	2994	2755	2559	206	202	194	5.682696198	5.732940861	5.661548315	1.91662508	1.834718903	1.691762304	Nek2	ENSMUSG00000026622	18005	NIMA (never in mitosis gene a)-related expressed kinase 2
ENSMUSG00000068699.12	chr6	29433256	29461883	+	Flnc	3.147139691	2.20E-12	2.11E-09	499	501	485	4599	4628	4829	3.098937648	3.274948339	3.26322951	6.393888431	6.349269812	6.325794078	Flnc	ENSMUSG00000068699	68794	filamin C, gamma
ENSMUSG00000020330.16	chr11	40701395	40733422	-	Hmmr	-4.382032536	3.01E-12	2.31E-09	4731	3785	3873	225	214	195	6.342678691	6.191110602	6.259324049	2.043610732	1.917774643	1.699160756	Hmmr	ENSMUSG00000020330	15366	hyaluronan mediated motility receptor (RHAMM)
ENSMUSG00000027306.15	chr2	119618298	119651244	+	Nusap1	-3.910096088	3.35E-12	2.34E-09	4984	4008	3970	265	297	359	6.417829859	6.273689208	6.295007004	2.279195159	2.389686664	2.57798392	Nusap1	ENSMUSG00000027306	108907	nucleolar and spindle associated protein 1
ENSMUSG00000033952.14	chr1	139454772	139494091	+	Aspm	-4.303924457	3.22E-12	2.34E-09	4677	3873	3929	208	195	275	6.326118719	6.224264473	6.280032061	1.930530682	1.783965603	2.194044468	Aspm	ENSMUSG00000033952	12316	abnormal spindle microtubule assembly
ENSMUSG00000017716.15	chr11	117849251	117855743	+	Birc5	-3.806364124	3.96E-12	2.41E-09	2682	2482	2355	176	177	222	5.523959236	5.582420451	5.541719641	1.690151482	1.64461602	1.885797485	Birc5	ENSMUSG00000017716	11799	baculoviral IAP repeat-containing 5
ENSMUSG00000022265.6	chr15	27466677	27594909	+	Ank	2.31183763	3.98E-12	2.41E-09	6899	6104	5829	33037	31065	35845	6.88687288	6.880499867	6.849058457	9.238444008	9.09596646	9.217640355	Ank	ENSMUSG00000022265	11732	progressive ankylosis
ENSMUSG00000026605.14	chr1	189640606	189688086	-	Cenpf	-4.590279714	4.31E-12	2.41E-09	4840	3728	3955	181	162	211	6.375537144	6.169222075	6.289546381	1.730452847	1.517236714	1.812649812	Cenpf	ENSMUSG00000026605	108000	centromere protein F
ENSMUSG00000027326.13	chr2	119047119	119105501	+	Casc5	-3.344653384	4.24E-12	2.41E-09	4914	4051	4055	390	458	523	6.39742571	6.289082874	6.325566103	2.835805847	3.013718729	3.120181686	Knl1	ENSMUSG00000027326	76464	kinetochore scaffold 1
ENSMUSG00000028068.14	chr3	88081971	88121048	+	Iqgap3	-3.7678429	3.91E-12	2.41E-09	3355	3187	2869	246	258	234	5.846908822	5.943052076	5.826485683	2.172070945	2.186961276	1.961580072	Iqgap3	ENSMUSG00000028068	404710	IQ motif containing GTPase activating protein 3
ENSMUSG00000051378.10	chr11	102905529	102925124	-	Kif18b	-3.12276861	4.40E-12	2.41E-09	7111	6404	6255	874	787	770	6.930534959	6.949712677	6.950811512	3.998941683	3.794076919	3.677787106	Kif18b	ENSMUSG00000051378	70218	kinesin family member 18B
ENSMUSG00000015880.13	chr5	45669919	45700546	+	Ncapg	-2.960443639	5.82E-12	2.86E-09	4098	3432	3419	468	541	493	6.135477063	6.049886454	6.079471698	3.098532346	3.253758333	3.035042234	Ncapg	ENSMUSG00000015880	54392	non-SMC condensin I complex, subunit G
ENSMUSG00000020649.11	chr12	24708241	24714146	+	Rrm2	-2.565751258	5.96E-12	2.86E-09	4772	4329	3854	736	772	825	6.355126263	6.384827156	6.252230037	3.751168824	3.766331928	3.777260364	Rrm2	ENSMUSG00000020649	20135	ribonucleotide reductase M2
ENSMUSG00000022033.9	chr14	65805837	65817822	+	Pbk	-3.700614188	5.65E-12	2.86E-09	2295	1990	1911	176	163	169	5.299189497	5.263757605	5.240391509	1.690151482	1.526087631	1.493277422	Pbk	ENSMUSG00000022033	52033	PDZ binding kinase
ENSMUSG00000045328.11	chr3	135212537	135273611	+	Cenpe	-3.173877154	5.70E-12	2.86E-09	9401	6967	7492	902	965	939	7.333272021	7.071267831	7.211133488	4.04441023	4.088073255	3.963885311	Cenpe	ENSMUSG00000045328	229841	centromere protein E
ENSMUSG00000022034.9	chr14	65819038	65833994	-	Esco2	-3.836211268	7.60E-12	3.40E-09	2484	2177	2024	155	151	194	5.413336607	5.393299452	5.323251952	1.507397879	1.416114789	1.691762304	Esco2	ENSMUSG00000022034	71988	establishment of sister chromatid cohesion N-acetyltransferase 2
ENSMUSG00000032218.6	chr9	70407689	70421554	-	Ccnb2	-4.15597028	7.33E-12	3.40E-09	3696	3212	3233	225	166	221	5.986540979	5.954323188	5.998782919	2.043610732	1.552319173	1.879298848	Ccnb2	ENSMUSG00000032218	12442	cyclin B2
ENSMUSG00000038418.7	chr18	34859823	34864984	+	Egr1	-3.622370862	7.77E-12	3.40E-09	6691	6102	6158	579	453	626	6.842710714	6.880027124	6.928265311	3.40529196	2.997899546	3.379306658	Egr1	ENSMUSG00000038418	13653	early growth response 1
ENSMUSG00000002944.15	chr5	17781690	17888801	-	Cd36	5.010966075	8.06E-12	3.43E-09	322	279	244	8776	8718	11890	2.467752131	2.431546922	2.273592679	7.326057112	7.262805034	7.625657721	Cd36	ENSMUSG00000002944	12491	CD36 molecule
ENSMUSG00000023015.13	chr15	99620496	99651656	-	Racgap1	-2.561396877	9.01E-12	3.47E-09	3851	3688	3473	667	660	667	6.045801491	6.153660969	6.102076406	3.609251135	3.540355557	3.470759986	Racgap1	ENSMUSG00000023015	26934	Rac GTPase-activating protein 1
ENSMUSG00000027715.9	chr3	36564865	36572150	-	Ccna2	-3.043671563	8.92E-12	3.47E-09	12506	10918	10505	1322	1327	1776	7.744987262	7.719329499	7.698759231	4.595679116	4.547436951	4.882957932	Ccna2	ENSMUSG00000027715	12428	cyclin A2
ENSMUSG00000029919.5	chr6	65117293	65144908	-	Hpgds	-4.300855588	9.02E-12	3.47E-09	1972	1720	1702	92	108	92	5.080406366	5.053454626	5.073341107	0.758008569	0.934492038	0.61951742	Hpgds	ENSMUSG00000029919	54486	hematopoietic prostaglandin D synthase
ENSMUSG00000058290.3	chr15	102296293	102324356	+	Espl1	-3.467923988	9.04E-12	3.47E-09	2789	2733	2460	259	233	279	5.580387617	5.721376109	5.604637825	2.246217837	2.040219545	2.214840432	Espl1	ENSMUSG00000058290	105988	extra spindle pole bodies 1, separase
ENSMUSG00000004552.16	chr1	131638306	131675505	+	Ctse	-4.372047618	9.56E-12	3.58E-09	4469	3931	3968	187	267	192	6.260494512	6.245706588	6.294280114	1.777373894	2.236335887	1.676850595	Ctse	ENSMUSG00000004552	13034	cathepsin E
ENSMUSG00000020897.12	chr11	69045647	69051664	+	Aurkb	-2.955886781	1.04E-11	3.62E-09	3076	2848	2781	377	436	388	5.721671058	5.78082914	5.781549415	2.786959943	2.942778649	2.689906748	Aurkb	ENSMUSG00000020897	20877	aurora kinase B
ENSMUSG00000026475.7	chr1	153740349	153745468	+	Rgs16	5.479180751	1.04E-11	3.62E-09	80	62	73	3464	3485	3334	0.465513659	0.270626734	0.539574369	5.985058549	5.940090718	5.791390693	Rgs16	ENSMUSG00000026475	19734	regulator of G-protein signaling 16
ENSMUSG00000030867.7	chr7	122159439	122169873	+	Plk1	-4.013044025	1.04E-11	3.62E-09	2635	2506	2157	150	149	183	5.498457757	5.596300968	5.415046868	1.460246785	1.39694248	1.607772212	Plk1	ENSMUSG00000030867	18817	polo like kinase 1
ENSMUSG00000023830.13	chr17	12682406	12769664	-	Igf2r	2.005327247	1.09E-11	3.71E-09	3482	2903	3063	13093	13353	14036	5.900504418	5.808419768	5.92086716	7.903190281	7.877871112	7.865031583	Igf2r	ENSMUSG00000023830	16004	insulin-like growth factor 2 receptor
ENSMUSG00000025701.12	chr6	116410077	116461178	-	Alox5	-1.950107745	1.12E-11	3.73E-09	7723	6761	6680	1828	1917	2109	7.049635836	7.027970069	7.045642394	5.06307202	5.077951668	5.130821331	Alox5	ENSMUSG00000025701	11689	arachidonate 5-lipoxygenase
ENSMUSG00000022951.15	chr16	92391953	92466146	-	Rcan1	3.0600787	1.17E-11	3.80E-09	1297	1103	1093	10075	9165	12055	4.476115604	4.412713363	4.434639529	7.525190923	7.334938676	7.645539826	Rcan1	ENSMUSG00000022951	54720	regulator of calcineurin 1
ENSMUSG00000028859.14	chr4	126024550	126044440	+	Csf3r	-5.98513963	1.33E-11	4.24E-09	3131	2662	2730	48	36	61	5.747234944	5.683408259	5.754851466	-0.173460049	-0.637234635	0.030650465	Csf3r	ENSMUSG00000028859	12986	colony stimulating factor 3 receptor (granulocyte)
ENSMUSG00000038379.15	chr9	83834689	83872389	+	Ttk	-3.943845003	1.46E-11	4.56E-09	1723	1557	1464	96	121	112	4.885722364	4.909858897	4.856094502	0.819084146	1.097753309	0.90191715	Ttk	ENSMUSG00000038379	22137	Ttk protein kinase
ENSMUSG00000006398.15	chr4	118432901	118437352	-	Cdc20	-2.923466319	1.51E-11	4.62E-09	5098	4909	4532	714	704	635	6.450453928	6.566202837	6.485993329	3.70741731	3.633396702	3.399884274	Cdc20	ENSMUSG00000006398	107995	cell division cycle 20
ENSMUSG00000015947.10	chr3	96282909	96293969	-	Fcgr1	-2.87206726	1.60E-11	4.62E-09	2218	1970	1880	288	310	287	5.249965619	5.249188483	5.216802615	2.399054617	2.451390264	2.255554105	Fcgr1	ENSMUSG00000015947	14129	Fc receptor, IgG, high affinity I
ENSMUSG00000026669.14	chr2	4989714	5012791	-	Mcm10	-2.448309526	1.56E-11	4.62E-09	3436	3330	3026	596	657	664	5.881321025	6.006365515	5.90333666	3.447005436	3.53378789	3.464261348	Mcm10	ENSMUSG00000026669	70024	minichromosome maintenance 10 replication initiation factor
ENSMUSG00000042489.15	chr4	126556935	126593903	+	Clspn	-2.330946573	1.59E-11	4.62E-09	3903	3672	3367	747	730	848	6.065149335	6.147389224	6.057364255	3.772556878	3.685681268	3.816906809	Clspn	ENSMUSG00000042489	269582	claspin
ENSMUSG00000023232.17	chr4	130253495	130279205	-	Serinc2	2.578535678	1.66E-11	4.71E-09	680	643	591	4037	3772	4430	3.545048132	3.634638787	3.548136383	6.205873653	6.054245991	6.201389766	Serinc2	ENSMUSG00000023232	230779	serine incorporator 2
ENSMUSG00000034765.6	chr19	53529109	53542431	+	Dusp5	1.911587421	1.70E-11	4.74E-09	1595	1390	1384	5690	5701	6172	4.774389674	4.746230478	4.775051363	6.700966815	6.650066616	6.679775175	Dusp5	ENSMUSG00000034765	240672	dual specificity phosphatase 5
ENSMUSG00000026656.15	chr1	170958617	170976547	-	Fcgr2b	-3.283292087	1.73E-11	4.74E-09	1936	1652	1559	192	181	190	5.053832567	4.995277005	4.946769862	1.815341744	1.676766544	1.661783147	Fcgr2b	ENSMUSG00000026656	14130	Fc receptor, IgG, low affinity IIb
ENSMUSG00000030789.9	chr7	128129547	128150657	+	Itgax	2.891039391	1.87E-11	5.03E-09	267	216	215	1750	1835	1950	2.197991862	2.063065664	2.091446083	5.000178455	5.014898205	5.017764242	Itgax	ENSMUSG00000030789	16411	integrin alpha X
ENSMUSG00000048922.18	chr14	67676331	67715841	-	Cdca2	-2.224776915	1.99E-11	5.27E-09	4305	4031	3676	837	902	1009	6.206561854	6.281943456	6.184019294	3.936572489	3.990723927	4.067561154	Cdca2	ENSMUSG00000048922	108912	cell division cycle associated 2
ENSMUSG00000027699.19	chr3	27097222	27153878	-	Ect2	-2.63296132	2.09E-11	5.28E-09	2472	2131	2152	394	390	379	5.406351586	5.362495789	5.411699547	2.850508599	2.782119544	2.656092035	Ect2	ENSMUSG00000027699	13605	ect2 oncogene
ENSMUSG00000032254.9	chr9	61917280	61946799	-	Kif23	-1.943751092	2.10E-11	5.28E-09	5446	4762	4583	1327	1388	1388	6.545710496	6.522345826	6.502135982	4.601123254	4.612252267	4.527447421	Kif23	ENSMUSG00000032254	71819	kinesin family member 23
ENSMUSG00000034416.18	chr8	116995679	117082449	-	Pkd1l2	3.363182911	2.10E-11	5.28E-09	601	583	553	6127	7054	5972	3.367017708	3.493431295	3.452341531	6.807709972	6.957268923	6.632255193	Pkd1l2	ENSMUSG00000034416	76645	polycystic kidney disease 1 like 2
ENSMUSG00000001435.14	chr10	77052178	77166548	-	Col18a1	2.180665243	2.26E-11	5.50E-09	1088	1080	1002	5046	5085	5224	4.222722473	4.382325806	4.309288546	6.527694547	6.485114715	6.439213217	Col18a1	ENSMUSG00000001435	12822	collagen, type XVIII, alpha 1
ENSMUSG00000012443.3	chr19	37376403	37421859	+	Kif11	-3.930679548	2.29E-11	5.50E-09	4649	3850	3729	286	335	242	6.317456645	6.21567253	6.204668536	2.389018437	2.563109762	2.009976896	Kif11	ENSMUSG00000012443	16551	kinesin family member 11
ENSMUSG00000030641.10	chr7	92857525	92874247	-	Ddias	-2.204916787	2.32E-11	5.50E-09	5731	4806	4846	1187	1093	1284	6.619293824	6.535613467	6.58262956	4.440338907	4.267678311	4.415127134	Ddias	ENSMUSG00000030641	74041	DNA damage-induced apoptosis suppressor
ENSMUSG00000033016.15	chr18	80606205	80713071	-	Nfatc1	2.248996549	2.33E-11	5.50E-09	7215	6382	6506	33618	30745	38115	6.951480435	6.944748366	7.007568001	9.263594844	9.081028454	9.30622614	Nfatc1	ENSMUSG00000033016	18018	nuclear factor of activated T cells, cytoplasmic, calcineurin dependent 1
ENSMUSG00000032359.14	chr9	90054152	90076089	+	Ctsh	-3.41223369	2.39E-11	5.53E-09	3656	3272	3187	312	288	425	5.970844427	5.981019926	5.978111651	2.514339488	2.345368314	2.821151281	Ctsh	ENSMUSG00000032359	13036	cathepsin H
ENSMUSG00000037725.8	chr8	22168160	22185819	-	Ckap2	-2.142309721	2.45E-11	5.53E-09	3076	2622	2668	631	683	709	5.721671058	5.661569506	5.72171532	3.529266032	3.589738333	3.558794833	Ckap2	ENSMUSG00000037725	80986	cytoskeleton associated protein 2
ENSMUSG00000097466.8	chr9	81631551	81645156	+	D430036J16Rik	-9.552166995	2.42E-11	5.53E-09	394	330	330	0	0	0	2.758478271	2.67334891	2.708408486	-6.773372891	-6.827059194	-6.911864041	D430036J16Rik	ENSMUSG00000097466	319405	RIKEN cDNA D430036J16 gene
ENSMUSG00000000028.14	chr16	18780447	18811987	-	Cdc45	-2.075155978	2.61E-11	5.67E-09	3686	3208	3056	812	856	851	5.982632822	5.952525717	5.917566876	3.892851111	3.915250242	3.821998679	Cdc45	ENSMUSG00000000028	12544	cell division cycle 45
ENSMUSG00000020493.8	chr11	87089153	87108708	-	Prr11	-3.549056836	2.62E-11	5.67E-09	1699	1473	1497	124	134	169	4.865491427	4.829873794	4.888242312	1.186629041	1.244403168	1.493277422	Prr11	ENSMUSG00000020493	270906	proline rich 11
ENSMUSG00000051235.8	chr12	11240926	11265787	-	Gen1	-3.434878184	2.57E-11	5.67E-09	1438	1358	1354	128	137	144	4.624946286	4.712641299	4.743446702	1.232251658	1.276228614	1.263061642	Gen1	ENSMUSG00000051235	209334	GEN1, Holliday junction 5' flap endonuclease
ENSMUSG00000015340.10	chrX	9435252	9487771	-	Cybb	-3.000581116	2.80E-11	5.89E-09	46017	36980	39021	5112	4721	6563	9.624491768	9.479319559	9.591883641	6.546440331	6.377970361	6.768385584	Cybb	ENSMUSG00000015340	13058	cytochrome b-245, beta polypeptide
ENSMUSG00000019942.12	chr10	69336635	69352938	-	Cdk1	-2.092906621	2.79E-11	5.89E-09	4172	3803	3421	899	927	1025	6.161293115	6.197954339	6.080315256	4.03960658	4.030144277	4.090247736	Cdk1	ENSMUSG00000019942	12534	cyclin-dependent kinase 1
ENSMUSG00000020838.12	chr11	76998603	77032340	+	Slc6a4	5.96486757	2.87E-11	5.89E-09	25	19	22	1415	1468	1608	-1.192977877	-1.409755332	-1.168244879	4.693723142	4.693068356	4.73963618	Slc6a4	ENSMUSG00000020838	15567	solute carrier family 6 (neurotransmitter transporter, serotonin), member 4
ENSMUSG00000048498.7	chr11	115051917	115062177	-	Cd300e	2.335879498	2.88E-11	5.89E-09	909	834	705	4243	4474	4455	3.963526608	4.009610688	3.802404297	6.277666071	6.300451569	6.209507585	Cd300e	ENSMUSG00000048498	217306	CD300E molecule
ENSMUSG00000026039.9	chr1	57995971	58025899	+	Sgol2a	-3.114992806	3.05E-11	6.15E-09	1969	1592	1541	200	205	221	5.078210482	4.941920106	4.930021198	1.874085535	1.855935389	1.879298848	Sgo2a	ENSMUSG00000026039	68549	shugoshin 2A
ENSMUSG00000027670.4	chr2	165393760	165400405	-	Ocstamp	3.175586901	3.09E-11	6.15E-09	190	205	194	1819	1837	2032	1.708243968	1.987837033	1.943528369	5.055953444	5.01646934	5.077175596	Ocstamp	ENSMUSG00000027670	74614	osteoclast stimulatory transmembrane protein
ENSMUSG00000029516.19	chr5	115845278	116008947	+	Cit	-2.765888011	3.28E-11	6.45E-09	1756	1499	1557	242	238	275	4.913084642	4.855108256	4.944918472	2.148468046	2.070786262	2.194044468	Cit	ENSMUSG00000029516	12704	citron
ENSMUSG00000001588.12	chr11	69881567	69895539	-	Acap1	-3.206615395	3.64E-11	7.02E-09	1346	1191	1185	143	148	139	4.529595295	4.523405685	4.551181972	1.391534035	1.387259926	1.212257271	Acap1	ENSMUSG00000001588	216859	ArfGAP with coiled-coil, ankyrin repeat and PH domains 1
ENSMUSG00000037544.13	chr14	47387779	47418407	-	Dlgap5	-2.251394217	3.66E-11	7.02E-09	4015	3565	3345	734	788	934	6.105960705	6.104731138	6.047908153	3.747245789	3.79590775	3.956186813	Dlgap5	ENSMUSG00000037544	218977	DLG associated protein 5
ENSMUSG00000004609.11	chr7	43524216	43544428	-	Cd33	-3.132277939	3.78E-11	7.12E-09	4663	3779	4052	503	427	600	6.321794183	6.188822123	6.324498495	3.202475077	2.912721415	3.318156395	Cd33	ENSMUSG00000004609	12489	CD33 antigen
ENSMUSG00000017146.12	chr11	101488764	101551955	-	Brca1	-1.853726646	3.81E-11	7.12E-09	4189	3683	3632	1046	1135	1221	6.16715914	6.151703976	6.166649107	4.257983705	4.322052796	4.342574107	Brca1	ENSMUSG00000017146	12189	breast cancer 1, early onset
ENSMUSG00000030677.8	chr7	127027729	127042471	-	Kif22	-2.631534207	3.87E-11	7.16E-09	1865	1735	1586	297	299	297	4.999943426	5.065978099	4.97153383	2.443372967	2.399352998	2.304881817	Kif22	ENSMUSG00000030677	110033	kinesin family member 22
ENSMUSG00000025351.13	chr10	128908919	128912816	+	Cd63	3.120482537	3.99E-11	7.29E-09	211	179	158	1647	1735	1708	1.859110634	1.792682483	1.648241054	4.912689858	4.934076455	4.826650492	Cd63	ENSMUSG00000025351	12512	CD63 antigen
ENSMUSG00000040722.6	chr9	57441328	57468024	-	Scamp5	1.979484657	4.09E-11	7.38E-09	718	632	614	2657	2705	2917	3.623441127	3.609764118	3.603171225	5.602481085	5.574620332	5.5986529	Scamp5	ENSMUSG00000040722	56807	secretory carrier membrane protein 5
ENSMUSG00000048327.6	chr2	129268210	129297212	-	Ckap2l	-3.477210608	4.22E-11	7.53E-09	4391	3935	3875	385	312	489	6.235094869	6.247173673	6.260068762	2.817214159	2.460653185	3.023301009	Ckap2l	ENSMUSG00000048327	70466	cytoskeleton associated protein 2-like
ENSMUSG00000024795.10	chr19	34922358	34975731	+	Kif20b	-2.442128329	4.41E-11	7.69E-09	4564	3798	3707	682	785	910	6.2908379	6.196056555	6.196133002	3.641312344	3.790408271	3.918651166	Kif20b	ENSMUSG00000024795	240641	kinesin family member 20B
ENSMUSG00000058773.2	chr13	21779883	21780625	-	Hist1h1b	-3.824951538	4.41E-11	7.69E-09	1861	1780	1576	137	140	117	4.996846682	5.102909169	4.962411479	1.329914917	1.307367126	0.964652906	Hist1h1b	ENSMUSG00000058773	56702	histone cluster 1, H1b
ENSMUSG00000032783.8	chr15	99074973	99083407	+	Troap	-3.87831604	4.53E-11	7.80E-09	1763	1757	1475	115	123	123	4.918822641	5.084151423	4.86689023	1.07837615	1.121308037	1.036503191	Troap	ENSMUSG00000032783	78733	trophinin associated protein
ENSMUSG00000027843.13	chr3	103859795	103912247	+	Ptpn22	2.167067199	4.60E-11	7.84E-09	4674	4086	4063	19061	18909	23880	6.325193123	6.301492468	6.328409203	8.445001141	8.379764402	8.631681382	Ptpn22	ENSMUSG00000027843	19260	protein tyrosine phosphatase, non-receptor type 22 (lymphoid)
ENSMUSG00000020315.18	chr11	30099395	30268175	-	Sptbn1	2.736687708	4.76E-11	7.93E-09	269	246	228	1610	1756	1942	2.208738243	2.250286285	2.175952379	4.879920054	4.951428667	5.011834842	Sptbn1	ENSMUSG00000020315	20742	spectrin beta, non-erythrocytic 1
ENSMUSG00000026069.15	chr1	40429570	40465415	+	Il1rl1	2.129927334	4.73E-11	7.93E-09	2069	1761	1811	7974	8434	10079	5.149663314	5.087431208	5.162871115	7.187805458	7.215027638	7.387272414	Il1rl1	ENSMUSG00000026069	17082	interleukin 1 receptor-like 1
ENSMUSG00000034557.14	chr4	108637466	108780798	-	Zfyve9	3.986407841	5.04E-11	8.31E-09	68	66	68	1109	1157	1175	0.232628864	0.360124884	0.437934107	4.342321061	4.349737284	4.287194783	Zfyve9	ENSMUSG00000034557	230597	zinc finger, FYVE domain containing 9
ENSMUSG00000030528.12	chr7	80454733	80535119	-	Blm	-2.194804039	5.22E-11	8.51E-09	3139	2632	2473	587	649	683	5.750915878	5.667060265	5.612240208	3.42507215	3.516126521	3.504933487	Blm	ENSMUSG00000030528	12144	Bloom syndrome, RecQ like helicase
ENSMUSG00000007080.14	chr5	110286306	110337474	+	Pole	-1.673291644	5.40E-11	8.62E-09	6650	5922	5960	2006	1997	2209	6.833843875	6.836833027	6.881119666	5.197092549	5.136920593	5.197640175	Pole	ENSMUSG00000007080	18973	polymerase (DNA directed), epsilon
ENSMUSG00000033031.13	chr16	48994185	49019709	+	C330027C09Rik	-2.04946541	5.34E-11	8.62E-09	3562	2965	2959	745	801	901	5.93327108	5.838902105	5.871039766	3.768691651	3.819499516	3.904319641	C330027C09Rik	ENSMUSG00000033031	224171	RIKEN cDNA C330027C09 gene
ENSMUSG00000021996.16	chr14	74732297	74750765	+	Esd	1.757037921	5.48E-11	8.62E-09	7340	6696	6326	22331	25688	25623	6.976259401	7.014033986	6.967093889	8.673419648	8.821775836	8.73331589	Esd	ENSMUSG00000021996	13885	esterase D/formylglutathione hydrolase
ENSMUSG00000051220.2	chrX	102141716	102157091	-	Ercc6l	-2.575539238	5.51E-11	8.62E-09	1681	1548	1466	248	288	306	4.850129844	4.901498117	4.85806338	2.18372915	2.345368314	2.347879223	Ercc6l	ENSMUSG00000051220	236930	excision repair cross-complementing rodent repair deficiency complementation group 6 like
ENSMUSG00000027331.15	chr2	118814003	118853957	+	Knstrn	-2.173229911	5.72E-11	8.86E-09	2657	2461	2340	529	623	617	5.510450757	5.570164473	5.532503074	3.275113983	3.457186555	3.358431286	Knstrn	ENSMUSG00000027331	51944	kinetochore-localized astrin/SPAG5 binding
ENSMUSG00000025758.10	chr3	40800019	40816883	+	Plk4	-2.49789903	5.82E-11	8.93E-09	2886	2434	2302	482	430	529	5.629702291	5.554252234	5.508887465	3.141012241	2.922810233	3.136622833	Plk4	ENSMUSG00000025758	20873	polo like kinase 4
ENSMUSG00000037902.18	chr2	129592835	129632228	+	Sirpa	-1.606656481	5.94E-11	9.01E-09	11814	10971	10454	3794	3764	4111	7.662867735	7.72631561	7.691738469	6.116321188	6.05118335	6.093585073	Sirpa	ENSMUSG00000037902	19261	signal-regulatory protein alpha
ENSMUSG00000037411.10	chr5	137061504	137072268	-	Serpine1	1.884764673	6.30E-11	9.47E-09	1404	1135	1157	4590	4980	4990	4.59043769	4.45395444	4.516698502	6.391062695	6.455015674	6.373104611	Serpine1	ENSMUSG00000037411	18787	serine (or cysteine) peptidase inhibitor, clade E, member 1
ENSMUSG00000029177.9	chr5	30666777	30674830	+	Cenpa	-2.194286217	6.47E-11	9.62E-09	2658	2282	2275	582	534	568	5.510993532	5.461241594	5.491869895	3.412741348	3.234986943	3.239152498	Cenpa	ENSMUSG00000029177	12615	centromere protein A
ENSMUSG00000047414.6	chr12	95692226	95785215	+	Flrt2	2.137474294	6.52E-11	9.62E-09	1532	1185	1359	6142	6110	6869	4.716268139	4.516122396	4.74876246	6.811237346	6.750015526	6.834125339	Flrt2	ENSMUSG00000047414	399558	fibronectin leucine rich transmembrane protein 2
ENSMUSG00000007783.10	chr7	44959372	44974851	-	Cpt1c	-2.670826332	7.17E-11	1.04E-08	1599	1339	1401	243	225	259	4.778002058	4.692321315	4.792658053	2.154405071	1.989924429	2.107726688	Cpt1c	ENSMUSG00000007783	78070	carnitine palmitoyltransferase 1c
ENSMUSG00000027784.10	chr3	69316861	69560802	+	Ppm1l	2.173766754	7.10E-11	1.04E-08	486	465	468	2129	2304	2416	3.060892775	3.167479806	3.211807262	5.282926123	5.343178858	5.326839239	Ppm1l	ENSMUSG00000027784	242083	protein phosphatase 1 (formerly 2C)-like
ENSMUSG00000005410.6	chr8	75109569	75128439	+	Mcm5	-1.688340032	7.33E-11	1.05E-08	16382	16070	15052	4989	5162	5625	8.134464692	8.276969645	8.217617521	6.511306643	6.506794967	6.545901574	Mcm5	ENSMUSG00000005410	17218	minichromosome maintenance complex component 5
ENSMUSG00000020101.14	chr10	60346851	60372684	+	Vsir	1.573765548	8.13E-11	1.12E-08	2311	2130	2074	6543	6816	7388	5.309210428	5.361818785	5.358449966	6.902473907	6.907756254	6.939201745	Vsir	ENSMUSG00000020101	74048	V-set immunoregulatory receptor
ENSMUSG00000024056.9	chr17	71496100	71526857	-	Ndc80	-3.633884699	8.14E-11	1.12E-08	1590	1380	1246	99	123	141	4.769861437	4.735817621	4.623569192	0.863251729	1.121308037	1.232794202	Ndc80	ENSMUSG00000024056	67052	NDC80 kinetochore complex component
ENSMUSG00000030854.17	chr7	47077795	47133684	-	Ptpn5	3.753342873	8.06E-11	1.12E-08	303	253	277	3714	3560	4837	2.380149487	2.290684386	2.456245986	6.085579419	5.970804943	6.328181905	Ptpn5	ENSMUSG00000030854	19259	protein tyrosine phosphatase, non-receptor type 5
ENSMUSG00000034206.15	chr16	37011786	37095417	+	Polq	-2.920077493	8.09E-11	1.12E-08	1588	1283	1348	192	209	193	4.768046155	4.630710029	4.737041831	1.815341744	1.883747239	1.684325715	Polq	ENSMUSG00000034206	77782	polymerase (DNA directed), theta
ENSMUSG00000020415.16	chr11	43420250	43426251	-	Pttg1	-2.214279659	8.23E-11	1.13E-08	2304	2070	2086	509	458	522	5.304834833	5.320605936	5.36677123	3.219565445	3.013718729	3.117423186	Pttg1	ENSMUSG00000020415	30939	pituitary tumor-transforming gene 1
ENSMUSG00000051627.2	chr13	23621755	23622502	-	Hist1h1e	-2.525891437	8.58E-11	1.16E-08	4767	4532	4117	726	950	825	6.353614004	6.450933754	6.347454959	3.731446096	4.065483622	3.777260364	Hist1h1e	ENSMUSG00000051627	50709	histone cluster 1, H1e
ENSMUSG00000010142.12	chr11	61126755	61149372	+	Tnfrsf13b	-2.893038055	8.81E-11	1.18E-08	1573	1301	1422	189	197	231	4.754358244	4.650802045	4.814114961	1.792681147	1.798649649	1.943004342	Tnfrsf13b	ENSMUSG00000010142	57916	tumor necrosis factor receptor superfamily, member 13b
ENSMUSG00000042351.8	chr15	80623505	80650559	+	Grap2	6.107039352	8.77E-11	1.18E-08	23	19	13	1308	1380	1396	-1.310814368	-1.409755332	-1.905210474	4.580325318	4.603915978	4.535735817	Grap2	ENSMUSG00000042351	17444	GRB2-related adaptor protein 2
ENSMUSG00000025422.8	chr10	127078907	127093169	+	Agap2	-7.050552613	9.00E-11	1.18E-08	3391	3022	3090	14	32	34	5.862304558	5.866369073	5.933526574	-1.915391896	-0.804691381	-0.803339584	Agap2	ENSMUSG00000025422	216439	ArfGAP with GTPase domain, ankyrin repeat and PH domain 2
ENSMUSG00000089809.9	chr5	99217426	99729065	-	A930011G23Rik	-2.756741811	8.98E-11	1.18E-08	1541	1272	1276	218	219	208	4.724715955	4.61829239	4.657879847	1.998116578	1.951017935	1.792039533	A930011G23Rik	ENSMUSG00000089809	319818	RIKEN cDNA A930011G23 gene
ENSMUSG00000041498.13	chr1	136466343	136531511	+	Kif14	-3.953860516	9.24E-11	1.20E-08	1616	1278	1285	80	92	116	4.793254573	4.625078894	4.668015919	0.557543987	0.704322266	0.952322104	Kif14	ENSMUSG00000041498	381293	kinesin family member 14
ENSMUSG00000045658.16	chr1	84036296	84364180	-	Pid1	1.709847628	9.61E-11	1.24E-08	4623	4125	4076	14323	15707	14806	6.309366454	6.315195714	6.333017324	8.032723552	8.112106765	7.942078992	Pid1	ENSMUSG00000045658	98496	phosphotyrosine interaction domain containing 1
ENSMUSG00000042029.6	chr12	116405402	116463531	+	Ncapg2	-1.890976734	9.86E-11	1.26E-08	4340	3664	3492	993	1109	1207	6.218242308	6.144243098	6.109946425	4.183003266	4.288634758	4.325943433	Ncapg2	ENSMUSG00000042029	76044	non-SMC condensin II complex, subunit G2
ENSMUSG00000035914.10	chr9	58524300	58555132	-	Cd276	2.293016026	9.96E-11	1.26E-08	626	633	620	3266	3056	3529	3.42576748	3.612043258	3.617189424	5.900157033	5.750605657	5.873384065	Cd276	ENSMUSG00000035914	102657	CD276 antigen
ENSMUSG00000021965.2	chr14	57806561	57826163	-	Ska3	-2.469301891	1.02E-10	1.28E-08	1690	1470	1368	284	303	285	4.857831082	4.826933518	4.758281744	2.378911951	2.418493512	2.245482895	Ska3	ENSMUSG00000021965	219114	spindle and kinetochore associated complex subunit 3
ENSMUSG00000032193.8	chr9	21723576	21749916	+	Ldlr	1.971165389	1.08E-10	1.35E-08	2360	2443	2127	9465	9827	9713	5.339473548	5.559575838	5.394845441	7.435090109	7.435549549	7.33391147	Ldlr	ENSMUSG00000032193	16835	low density lipoprotein receptor
ENSMUSG00000026482.13	chr1	152516760	152766351	-	Rgl1	1.541190685	1.12E-10	1.38E-08	3285	2819	2841	8936	8895	9993	5.816494007	5.766066076	5.812339024	7.352121301	7.291800789	7.374910282	Rgl1	ENSMUSG00000026482	19731	ral guanine nucleotide dissociation stimulator,-like 1
ENSMUSG00000037855.15	chr10	67886103	67912662	-	Zfp365	3.982837403	1.12E-10	1.38E-08	101	71	83	1469	1340	1502	0.799932698	0.464713786	0.723606317	4.747736752	4.56149631	4.641285235	Zfp365	ENSMUSG00000037855	216049	zinc finger protein 365
ENSMUSG00000006310.10	chr7	30589681	30598909	-	Zbtb32	1.603296708	1.14E-10	1.38E-08	4447	4013	3906	13142	12557	14504	6.253375671	6.275487631	6.271562923	7.908579223	7.78920246	7.912348902	Zbtb32	ENSMUSG00000006310	58206	zinc finger and BTB domain containing 32
ENSMUSG00000027379.13	chr2	127801122	127831865	-	Bub1	-2.817516717	1.15E-10	1.38E-08	4560	3603	3714	543	701	561	6.289573071	6.120025579	6.198854335	3.312763334	3.627240099	3.221278172	Bub1	ENSMUSG00000027379	12235	BUB1, mitotic checkpoint serine/threonine kinase
ENSMUSG00000031756.5	chr8	116921730	116941507	+	Cenpn	-2.662376122	1.16E-10	1.39E-08	1333	1174	1241	191	220	221	4.51559889	4.502673447	4.61777057	1.807827691	1.957575651	1.879298848	Cenpn	ENSMUSG00000031756	72155	centromere protein N
ENSMUSG00000020492.11	chr11	87109234	87124635	+	Ska2	-2.103642417	1.22E-10	1.44E-08	1561	1421	1361	336	360	383	4.743313635	4.778040833	4.750883291	2.621089803	2.666796255	2.671218727	Ska2	ENSMUSG00000020492	66140	spindle and kinetochore associated complex subunit 2
ENSMUSG00000046591.10	chr7	79660196	79698148	+	Ticrr	-2.291700658	1.22E-10	1.44E-08	2341	2070	1921	404	450	530	5.327814103	5.320605936	5.247919285	2.886623001	2.988324101	3.1393449	Ticrr	ENSMUSG00000046591	77011	TOPBP1-interacting checkpoint and replication regulator
ENSMUSG00000031586.16	chr8	33782643	33929863	-	Rbpms	-5.512190792	1.29E-10	1.50E-08	1556	1388	1292	26	27	48	4.738686642	4.744153911	4.675850589	-1.045452437	-1.045699481	-0.311951199	Rbpms	ENSMUSG00000031586	19663	RNA binding protein gene with multiple splicing
ENSMUSG00000045362.8	chr7	143607659	143628722	-	Tnfrsf26	-1.770286718	1.30E-10	1.50E-08	3596	2935	3035	945	997	1048	5.946974669	5.82423299	5.907620482	4.111560757	4.135113837	4.122247105	Tnfrsf26	ENSMUSG00000045362	244237	tumor necrosis factor receptor superfamily, member 26
ENSMUSG00000095217.1	chr13	21754123	21754503	+	Hist1h2bn	-2.951731675	1.29E-10	1.50E-08	1387	1355	1153	166	181	189	4.572868837	4.709451847	4.511704313	1.606005476	1.676766544	1.654189997	Hist1h2bn	ENSMUSG00000095217	319187	histone cluster 1, H2bn
ENSMUSG00000018819.10	chr7	142460809	142494867	+	Lsp1	-1.650848915	1.38E-10	1.55E-08	4977	4656	4477	1596	1588	1619	6.415802381	6.489872712	6.468379741	4.867323946	4.80639018	4.749468712	Lsp1	ENSMUSG00000018819	16985	lymphocyte specific 1
ENSMUSG00000036181.2	chr13	23738808	23740367	+	Hist1h1c	-2.406749557	1.37E-10	1.55E-08	2563	2662	2379	486	534	512	5.458495963	5.683408259	5.556344763	3.152923103	3.234986943	3.089544154	Hist1h1c	ENSMUSG00000036181	50708	histone cluster 1, H1c
ENSMUSG00000037313.16	chr5	33658128	33678995	+	Tacc3	-1.619765723	1.38E-10	1.55E-08	4452	4206	3979	1411	1481	1503	6.254996677	6.343247078	6.298273485	4.689640522	4.705783717	4.642245112	Tacc3	ENSMUSG00000037313	21335	transforming, acidic coiled-coil containing protein 3
ENSMUSG00000034906.15	chr2	127103809	127133954	-	Ncaph	-2.259821271	1.47E-10	1.65E-08	2997	2785	2587	558	699	616	5.684140819	5.74856305	5.677245172	3.352040579	3.623121053	3.356093044	Ncaph	ENSMUSG00000034906	215387	non-SMC condensin I complex, subunit H
ENSMUSG00000021451.15	chr13	51701246	51793747	-	Sema4d	-3.10667914	1.50E-10	1.67E-08	1810	1670	1555	228	170	231	4.956769242	5.010906716	4.943064704	2.062677464	1.586568735	1.943004342	Sema4d	ENSMUSG00000021451	20354	sema domain, immunoglobulin domain (Ig), transmembrane domain (TM) and short cytoplasmic domain, (semaphorin) 4D
ENSMUSG00000030978.10	chr7	102441695	102469771	+	Rrm1	-1.52516316	1.54E-10	1.69E-08	9258	8481	8028	2957	3309	3306	7.311159542	7.354946169	7.310816777	5.756789562	5.865338361	5.779225145	Rrm1	ENSMUSG00000030978	20133	ribonucleotide reductase M1
ENSMUSG00000036067.12	chr2	27021363	27027998	-	Slc2a6	-1.821803587	1.57E-10	1.72E-08	4001	3810	3653	1180	1131	1157	6.100921975	6.200607049	6.174965516	4.431809435	4.316961675	4.264932437	Slc2a6	ENSMUSG00000036067	227659	solute carrier family 2 (facilitated glucose transporter), member 6
ENSMUSG00000026779.6	chr2	23115606	23156024	-	Mastl	-2.913640335	1.63E-10	1.77E-08	1410	1191	1175	148	179	210	4.596587731	4.523405685	4.538960848	1.440946229	1.660780839	1.805812382	Mastl	ENSMUSG00000026779	67121	microtubule associated serine/threonine kinase-like
ENSMUSG00000024660.8	chr19	9872297	9899533	-	Incenp	-1.655118873	1.71E-10	1.84E-08	4487	4049	3884	1373	1311	1534	6.266293004	6.28837052	6.263415221	4.650268304	4.529942898	4.67168889	Incenp	ENSMUSG00000024660	16319	inner centromere protein
ENSMUSG00000072082.6	chr17	24223232	24251409	-	Ccnf	-2.326269988	1.90E-10	2.04E-08	3678	3548	3171	761	778	681	5.979498657	6.09783604	5.970851651	3.799327335	3.777494035	3.500705806	Ccnf	ENSMUSG00000072082	12449	cyclin F
ENSMUSG00000000753.15	chr11	75409769	75422701	-	Serpinf1	-1.742005006	1.93E-10	2.04E-08	2457	2238	2190	726	698	776	5.397572482	5.433159052	5.436946524	3.731446096	3.621057111	3.688978074	Serpinf1	ENSMUSG00000000753	20317	serine (or cysteine) peptidase inhibitor, clade F, member 1
ENSMUSG00000101304.1	chr9	50488795	50507823	-	Plet1os	3.614414391	1.92E-10	2.04E-08	71	65	75	870	892	1012	0.294468117	0.33826545	0.578306764	3.992327596	3.974649165	4.071842152	Plet1os	ENSMUSG00000101304	69631	placenta expressed transcript 1, opposite strand
ENSMUSG00000037020.16	chr7	30240138	30280419	-	Wdr62	-1.940765349	1.94E-10	2.04E-08	1779	1629	1605	464	459	472	4.931852998	4.975056086	4.988708974	3.086161895	3.016861857	2.972306478	Wdr62	ENSMUSG00000037020	233064	WD repeat domain 62
ENSMUSG00000026355.11	chr1	128331590	128359664	-	Mcm6	-1.479275131	1.99E-10	2.08E-08	12682	11074	10223	4160	4194	4646	7.765148321	7.739796393	7.659503589	6.249168312	6.207223937	6.270064652	Mcm6	ENSMUSG00000026355	17219	minichromosome maintenance complex component 6
ENSMUSG00000023940.14	chr17	53674786	53689333	-	Sgol1	-2.634982549	2.09E-10	2.15E-08	1089	997	1009	175	185	172	4.224047262	4.26701548	4.31932722	1.681954329	1.708216182	1.518588511	Sgo1	ENSMUSG00000023940	72415	shugoshin 1
ENSMUSG00000028718.16	chr4	115000159	115043196	+	Stil	-2.212679607	2.11E-10	2.15E-08	1520	1334	1298	289	305	364	4.704926882	4.686926039	4.682532323	2.404046647	2.427969375	2.597910963	Stil	ENSMUSG00000028718	20460	Scl/Tal1 interrupting locus
ENSMUSG00000062510.12	chr1	191063012	191086474	+	Nsl1	-2.376468643	2.10E-10	2.15E-08	1082	964	966	191	213	215	4.21474809	4.218479877	4.256527946	1.807827691	1.911033065	1.839680018	Nsl1	ENSMUSG00000062510	381318	NSL1, MIS12 kinetochore complex component
ENSMUSG00000020185.16	chr10	110745439	110787384	+	E2f7	-2.405777237	2.17E-10	2.20E-08	1499	1302	1246	257	246	314	4.684862588	4.651910106	4.623569192	2.235055731	2.118384642	2.385052166	E2f7	ENSMUSG00000020185	52679	E2F transcription factor 7
ENSMUSG00000001123.15	chr11	78962974	78984946	-	Lgals9	-2.599017846	2.50E-10	2.53E-08	4694	3855	3629	638	633	888	6.331352573	6.217544702	6.165457125	3.545169918	3.480141615	3.883363925	Lgals9	ENSMUSG00000001123	16859	lectin, galactose binding, soluble 9
ENSMUSG00000062248.5	chr13	51645232	51650660	+	Cks2	-2.00869907	2.55E-10	2.56E-08	1876	1794	1784	476	457	516	5.008425356	5.114208657	5.14120621	3.122959513	3.010568739	3.100760498	Cks2	ENSMUSG00000062248	66197	CDC28 protein kinase regulatory subunit 2
ENSMUSG00000024164.15	chr17	57203970	57228136	-	C3	-2.177632352	2.79E-10	2.75E-08	2598	2156	2066	535	475	601	5.478060124	5.37931845	5.352875673	3.291369873	3.066242337	3.320556886	C3	ENSMUSG00000024164	12266	complement component 3
ENSMUSG00000032586.9	chr9	107950136	107972270	+	Traip	-3.166619461	2.79E-10	2.75E-08	1165	1097	1058	137	145	115	4.32133007	4.404847673	4.387707578	1.329914917	1.357816149	0.939885001	Traip	ENSMUSG00000032586	22036	TRAF-interacting protein
ENSMUSG00000039396.11	chr8	53586867	53639065	-	Neil3	-4.106116424	2.80E-10	2.75E-08	697	628	579	42	36	39	3.580646187	3.600611383	3.518566875	-0.363981955	-0.637234635	-0.608083293	Neil3	ENSMUSG00000039396	234258	nei like 3 (E. coli)
ENSMUSG00000032012.7	chr9	43744576	43807454	+	Nectin1	1.868653723	2.86E-10	2.79E-08	2823	2712	2681	10668	9648	11873	5.597865697	5.710249871	5.728726562	7.607696834	7.409029762	7.623593605	Nectin1	ENSMUSG00000032012	58235	nectin cell adhesion molecule 1
ENSMUSG00000020808.3	chr11	72042032	72047370	+	Fam64a	-4.398100635	2.98E-10	2.84E-08	1066	1057	940	40	63	53	4.193265031	4.351284397	4.217186158	-0.433522889	0.161625492	-0.170397054	Pimreg	ENSMUSG00000020808	109212	PICALM interacting mitotic regulator
ENSMUSG00000029414.11	chr5	123749716	123821593	+	Kntc1	-2.292074664	2.95E-10	2.84E-08	3869	3220	3369	627	773	895	6.052528225	5.957911425	6.058220835	3.520098757	3.768198287	3.894685581	Kntc1	ENSMUSG00000029414	208628	kinetochore associated 1
ENSMUSG00000035683.13	chr4	44300876	44364675	+	Melk	-2.936242015	2.94E-10	2.84E-08	1561	1537	1509	174	240	233	4.743313635	4.891213144	4.899757066	1.673710335	2.082833889	1.955414699	Melk	ENSMUSG00000035683	17279	maternal embryonic leucine zipper kinase
ENSMUSG00000063021.3	chr13	21753435	21753827	-	Hist1h2ak	-2.882458271	2.97E-10	2.84E-08	2398	2467	2130	350	282	387	5.362513505	5.573676818	5.39687836	2.679897743	2.315047863	2.686188459	Hist1h2ak	ENSMUSG00000063021	319169	histone cluster 1, H2ak
ENSMUSG00000046179.17	chr7	48866429	48881596	-	E2f8	-2.299849915	3.14E-10	2.96E-08	2255	2046	2000	414	409	553	5.273828351	5.3037854	5.306046938	2.9218554	2.850660447	3.200575466	E2f8	ENSMUSG00000046179	108961	E2F transcription factor 8
ENSMUSG00000049422.6	chr10	75935573	75937725	+	Chchd10	-2.486461923	3.15E-10	2.96E-08	1108	1070	944	182	199	213	4.248989836	4.368911529	4.223309011	1.738379762	1.813185742	1.826228219	Chchd10	ENSMUSG00000049422	103172	coiled-coil-helix-coiled-coil-helix domain containing 10
ENSMUSG00000019960.7	chr10	99263231	99267488	+	Dusp6	-1.664948246	3.24E-10	3.03E-08	5093	4378	4324	1513	1416	1725	6.449038411	6.401063445	6.418219646	4.790300068	4.641055692	4.840934718	Dusp6	ENSMUSG00000019960	67603	dual specificity phosphatase 6
ENSMUSG00000030346.16	chr6	126923050	126939587	-	Rad51ap1	-2.61230037	3.38E-10	3.13E-08	1115	1117	1015	168	193	206	4.258071579	4.430901565	4.327876549	1.62323189	1.769130562	1.778133931	Rad51ap1	ENSMUSG00000030346	19362	RAD51 associated protein 1
ENSMUSG00000039234.11	chr3	123267455	123365641	+	Sec24d	1.974237489	3.39E-10	3.13E-08	1192	1139	1048	4692	4250	5295	4.354370332	4.459027658	4.37401317	6.422768138	6.22635765	6.458687153	Sec24d	ENSMUSG00000039234	69608	Sec24 related gene family, member D (S. cerevisiae)
ENSMUSG00000028347.14	chr4	48585174	48663131	+	Tmeff1	2.775255827	3.49E-10	3.21E-08	199	180	144	1191	1343	1286	1.774841717	1.800697476	1.514827707	4.445190345	4.564721412	4.417371701	Tmeff1	ENSMUSG00000028347	230157	transmembrane protein with EGF-like and two follistatin-like domains 1
ENSMUSG00000028599.10	chr4	145213463	145246870	-	Tnfrsf1b	-1.471581076	3.64E-10	3.32E-08	2853	2508	2434	960	994	1047	5.613113628	5.597451672	5.58931181	4.134268912	4.130768367	4.120870488	Tnfrsf1b	ENSMUSG00000028599	21938	tumor necrosis factor receptor superfamily, member 1b
ENSMUSG00000017861.11	chr2	163054687	163084688	+	Mybl2	-1.892832283	3.72E-10	3.38E-08	3667	3435	3071	988	876	1067	5.975178031	6.051146817	5.924629692	4.175724264	3.948551086	4.148156314	Mybl2	ENSMUSG00000017861	17865	myeloblastosis oncogene-like 2
ENSMUSG00000079017.3	chr12	103442167	103443680	-	Ifi27l2a	-3.255449193	3.79E-10	3.42E-08	946	777	743	94	80	101	4.021055476	3.907541314	3.878090956	0.788869533	0.503857684	0.753471876	Ifi27l2a	ENSMUSG00000079017	76933	interferon, alpha-inducible protein 27 like 2A
ENSMUSG00000020826.7	chr11	78920787	78960254	+	Nos2	-4.651292684	3.89E-10	3.49E-08	1109	1011	1067	57	43	37	4.250290733	4.287123053	4.399922379	0.07211716	-0.384115698	-0.68304535	Nos2	ENSMUSG00000020826	18126	nitric oxide synthase 2, inducible
ENSMUSG00000029915.14	chr6	40574894	40585821	-	Clec5a	1.400952801	4.00E-10	3.56E-08	7374	6213	6379	17129	19021	20224	6.982926302	6.906032886	6.979129665	8.290822529	8.388284204	8.391952375	Clec5a	ENSMUSG00000029915	23845	C-type lectin domain family 5, member a
ENSMUSG00000023505.13	chr6	124829547	124833701	+	Cdca3	-2.765899609	4.11E-10	3.60E-08	2268	2362	2011	355	377	314	5.282119725	5.510941063	5.313958047	2.700332858	2.73327364	2.385052166	Cdca3	ENSMUSG00000023505	14793	cell division cycle associated 3
ENSMUSG00000047534.16	chr12	65132734	65172604	-	Mis18bp1	-1.619446484	4.08E-10	3.60E-08	3271	2752	2648	935	1046	1029	5.810333336	5.731369297	5.710861818	4.096220952	4.204297402	4.095864074	Mis18bp1	ENSMUSG00000047534	217653	MIS18 binding protein 1
ENSMUSG00000059495.13	chr9	42963842	43105718	-	Arhgef12	1.441481972	4.09E-10	3.60E-08	1849	1615	1549	4446	4860	5256	4.987516366	4.962607484	4.937489064	6.345081579	6.419829822	6.448022756	Arhgef12	ENSMUSG00000059495	69632	Rho guanine nucleotide exchange factor (GEF) 12
ENSMUSG00000035365.15	chr10	88091432	88146941	-	Parpbp	-2.727883686	4.19E-10	3.64E-08	1017	955	866	143	170	145	4.12540986	4.204954512	4.098957963	1.391534035	1.586568735	1.273011302	Parpbp	ENSMUSG00000035365	75317	PARP1 binding protein
ENSMUSG00000049313.8	chr9	41964720	42124297	-	Sorl1	-1.505993438	4.20E-10	3.64E-08	7041	6314	6176	2400	2548	2401	6.916263854	6.929295235	6.932475855	5.455746329	5.488373444	5.317856052	Sorl1	ENSMUSG00000049313	20660	sortilin-related receptor, LDLR class A repeats-containing
ENSMUSG00000001403.13	chr2	164769898	164778822	+	Ube2c	-2.299417194	4.29E-10	3.68E-08	6697	5675	5701	1231	1119	1606	6.844003741	6.77537423	6.817027835	4.492828021	4.301579619	4.737841225	Ube2c	ENSMUSG00000001403	68612	ubiquitin-conjugating enzyme E2C
ENSMUSG00000005233.16	chr2	69193895	69206194	-	Spc25	-2.742180386	4.31E-10	3.68E-08	1945	1771	1774	305	328	251	5.060522046	5.095598199	5.133098883	2.481655678	2.532690366	2.062550549	Spc25	ENSMUSG00000005233	66442	SPC25, NDC80 kinetochore complex component, homolog (S. cerevisiae)
ENSMUSG00000034271.15	chr12	85599105	85639878	+	Jdp2	1.758691949	4.32E-10	3.68E-08	1633	1436	1502	5179	5938	5431	4.80834752	4.793184726	4.8930513	6.565224228	6.708823658	6.495270921	Jdp2	ENSMUSG00000034271	81703	Jun dimerization protein 2
ENSMUSG00000003452.15	chr6	149408886	149563329	+	Bicd1	6.722883966	4.36E-10	3.69E-08	12	15	11	1295	1448	1692	-2.22154703	-1.740961241	-2.13653602	4.565920409	4.673284775	4.813076078	Bicd1	ENSMUSG00000003452	12121	BICD cargo adaptor 1
ENSMUSG00000071757.10	chr15	57694665	57839832	+	Zhx2	5.89415631	4.54E-10	3.83E-08	9	9	7	535	554	587	-2.617475706	-2.447230038	-2.75320738	3.291369873	3.287984456	3.286581001	Zhx2	ENSMUSG00000071757	387609	zinc fingers and homeoboxes 2
ENSMUSG00000028175.15	chr3	159495433	159529955	+	Depdc1a	-4.216867556	4.66E-10	3.90E-08	807	780	650	44	40	43	3.79191523	3.913097271	3.685307271	-0.29763946	-0.487209191	-0.468920545	Depdc1a	ENSMUSG00000028175	76131	DEP domain containing 1a
ENSMUSG00000044201.9	chr18	34732997	34751533	-	Cdc25c	-4.132148055	4.72E-10	3.91E-08	778	636	662	45	45	36	3.73915001	3.618859153	3.711678669	-0.265578251	-0.319264554	-0.722039482	Cdc25c	ENSMUSG00000044201	12532	cell division cycle 25C
ENSMUSG00000044313.13	chr3	101813076	101848959	-	Mab21l3	-2.713895668	4.72E-10	3.91E-08	738	661	676	108	106	123	3.663050891	3.674439795	3.741848148	0.988178341	0.907650426	1.036503191	Mab21l3	ENSMUSG00000044313	242125	mab-21-like 3 (C. elegans)
ENSMUSG00000099568.1	chr1	153743552	153749324	-	Gm28513	5.64374296	4.85E-10	4.00E-08	30	27	26	1505	1317	1711	-0.934665882	-0.913797838	-0.932177521	4.782654101	4.536528052	4.829181536	NA	NA	NA	NA
ENSMUSG00000019773.7	chr10	5799160	5805600	-	Fbxo5	-2.38710491	4.97E-10	4.04E-08	1189	1094	940	205	215	236	4.350736337	4.400898688	4.217186158	1.909621692	1.924484865	1.973832333	Fbxo5	ENSMUSG00000019773	67141	F-box protein 5
ENSMUSG00000020712.11	chr11	106276672	106288745	+	Tcam1	2.317168051	4.98E-10	4.04E-08	235	219	216	1118	1261	1198	2.01418003	2.082919578	2.098125239	4.35397665	4.473865297	4.315150153	Tcam1	ENSMUSG00000020712	75870	testicular cell adhesion molecule 1
ENSMUSG00000031762.7	chr8	94172664	94173568	+	Mt2	2.034723942	4.93E-10	4.04E-08	396	315	341	1529	1521	1552	2.765773836	2.606338644	2.755643793	4.8054715	4.744219424	4.688513512	Mt2	ENSMUSG00000031762	17750	metallothionein 2
ENSMUSG00000021886.6	chr12	98268635	98276624	+	Gpr65	-3.422519113	5.12E-10	4.13E-08	913	699	755	80	76	78	3.969857699	3.755022696	3.901189969	0.557543987	0.430328648	0.382756708	Gpr65	ENSMUSG00000021886	14744	G-protein coupled receptor 65
ENSMUSG00000021876.14	chr14	51091077	51106151	+	Rnase4	-2.369030826	5.21E-10	4.18E-08	794	734	706	146	155	160	3.76850019	3.825461129	3.804447775	1.421383963	1.453711576	1.414565446	Rnase4	ENSMUSG00000021876	58809	ribonuclease, RNase A family 4
ENSMUSG00000002297.15	chr5	8396973	8422716	-	Dbf4	-1.430969539	5.29E-10	4.20E-08	3759	3377	3157	1248	1380	1451	6.010921867	6.026582503	5.964469043	4.512607215	4.603915978	4.591464816	Dbf4	ENSMUSG00000002297	27214	DBF4 zinc finger
ENSMUSG00000044350.14	chr14	77024200	77036904	-	Lacc1	-1.511464154	5.31E-10	4.20E-08	2996	2539	2527	954	1040	1024	5.683659439	5.615171207	5.643397401	4.125228496	4.196002055	4.088840228	Lacc1	ENSMUSG00000044350	210808	laccase (multicopper oxidoreductase) domain containing 1
ENSMUSG00000069793.11	chr11	82979629	82991830	-	Slfn9	-1.848108647	5.29E-10	4.20E-08	1740	1538	1403	429	482	476	4.899882879	4.892151177	4.794715373	2.97314143	3.087325938	2.984468363	Slfn9	ENSMUSG00000069793	237886	schlafen 9
ENSMUSG00000025877.14	chr13	55005985	55021385	-	Hk3	-3.027427288	5.38E-10	4.21E-08	1478	1367	1331	192	209	152	4.664515309	4.722167567	4.718738737	1.815341744	1.883747239	1.340801392	Hk3	ENSMUSG00000025877	212032	hexokinase 3
ENSMUSG00000040466.16	chr7	27447978	27466144	+	Blvrb	1.767768475	5.37E-10	4.21E-08	1797	1730	1565	5875	5669	7057	4.946372836	5.061815675	4.952309817	6.747123022	6.641946598	6.873077467	Blvrb	ENSMUSG00000040466	233016	biliverdin reductase B (flavin reductase (NADPH))
ENSMUSG00000043036.13	chr5	122108040	122140823	-	Ccdc63	-3.214052725	5.66E-10	4.39E-08	695	603	607	69	82	68	3.576503485	3.54205241	3.586642623	0.345568181	0.53926302	0.186168042	Ccdc63	ENSMUSG00000043036	330188	coiled-coil domain containing 63
ENSMUSG00000089672.4	chr10	51480632	51486316	+	Lilr4b	2.031687467	5.67E-10	4.39E-08	567	427	474	1963	2070	2377	3.283073363	3.044623059	3.230166301	5.165838991	5.188704293	5.303365585	Lilr4b	ENSMUSG00000112023	14727	leukocyte immunoglobulin-like receptor, subfamily B, member 4B
ENSMUSG00000022636.13	chr16	52248996	52454074	-	Alcam	1.280379857	5.81E-10	4.48E-08	2892	2526	2432	6453	6907	6999	5.632698025	5.607766913	5.588126114	6.882493199	6.926888747	6.861172113	Alcam	ENSMUSG00000022636	11658	activated leukocyte cell adhesion molecule
ENSMUSG00000025473.16	chr7	139978932	139992562	-	Adam8	1.53609893	5.87E-10	4.50E-08	21975	19412	19089	61858	56762	69252	8.558205151	8.549540753	8.560393719	10.14331134	9.965591317	10.16771449	Adam8	ENSMUSG00000025473	11501	a disintegrin and metallopeptidase domain 8
ENSMUSG00000004415.15	chr5	136741759	136883209	-	Col26a1	-6.337969494	6.03E-10	4.54E-08	955	953	895	9	10	18	4.034708844	4.201931577	4.146451646	-2.525445378	-2.434741772	-1.702410675	Col26a1	ENSMUSG00000004415	140709	collagen, type XXVI, alpha 1
ENSMUSG00000013076.15	chr9	14541966	14615483	-	Amotl1	1.516956249	6.01E-10	4.54E-08	4656	3981	4221	12295	12365	14767	6.319627044	6.263938791	6.383442023	7.812469892	7.766973762	7.938273951	Amotl1	ENSMUSG00000013076	75723	angiomotin-like 1
ENSMUSG00000024370.16	chr18	34630951	34651735	-	Cdc23	-1.382512536	5.98E-10	4.54E-08	9392	8270	7726	3342	3579	3466	7.331890276	7.318601285	7.25550135	5.933338954	5.97848317	5.847400004	Cdc23	ENSMUSG00000024370	52563	CDC23 cell division cycle 23
ENSMUSG00000039748.11	chr1	175880581	175913489	+	Exo1	-1.961175764	6.02E-10	4.54E-08	1323	1301	1216	340	344	369	4.50473926	4.650802045	4.588422629	2.638138097	2.601300978	2.617566513	Exo1	ENSMUSG00000039748	26909	exonuclease 1
ENSMUSG00000040084.9	chr2	118598211	118641591	+	Bub1b	-2.015125812	6.25E-10	4.65E-08	5996	5689	5186	1463	1645	1366	6.684501748	6.778928606	6.680447604	4.741834139	4.857251117	4.504405704	Bub1b	ENSMUSG00000040084	12236	BUB1B, mitotic checkpoint serine/threonine kinase
ENSMUSG00000064168.4	chr13	23542970	23543357	-	Hist1h2bh	-2.635936742	6.23E-10	4.65E-08	903	874	883	143	142	172	3.953977572	4.077157023	4.126988349	1.391534035	1.327758915	1.518588511	Hist1h2bh	ENSMUSG00000114456	319182	histone cluster 1, H2bh
ENSMUSG00000034349.14	chr3	69004738	69034623	+	Smc4	-1.576081815	6.35E-10	4.71E-08	11785	9881	10309	3364	3833	4294	7.659322126	7.575356791	7.671588769	5.942803514	6.07738727	6.156410415	Smc4	ENSMUSG00000034349	70099	structural maintenance of chromosomes 4
ENSMUSG00000054404.12	chr11	82951349	82962941	+	Slfn5	-3.610850954	6.45E-10	4.75E-08	1044	926	782	65	88	87	4.163193558	4.160489615	3.951848966	0.26005011	0.640546356	0.539347071	Slfn5	ENSMUSG00000054404	327978	schlafen 5
ENSMUSG00000017499.15	chr11	98907801	98923940	+	Cdc6	-1.68282219	6.50E-10	4.77E-08	2775	2569	2401	818	921	841	5.573128758	5.632114386	5.569622118	3.903465715	4.020781161	3.80495542	Cdc6	ENSMUSG00000017499	23834	cell division cycle 6
ENSMUSG00000024521.7	chr18	66458604	66465550	+	Pmaip1	-1.725632838	6.77E-10	4.92E-08	5020	3995	4116	1251	1512	1475	6.428212117	6.269002788	6.347104535	4.516069684	4.735660233	4.615124165	Pmaip1	ENSMUSG00000024521	58801	phorbol-12-myristate-13-acetate-induced protein 1
ENSMUSG00000056145.5	chr3	107039504	107054347	+	AI504432	-3.485247901	6.78E-10	4.92E-08	1164	886	1002	91	83	117	4.320091705	4.09681927	4.309288546	0.742326947	0.556645098	0.964652906	AI504432	ENSMUSG00000056145	229694	expressed sequence AI504432
ENSMUSG00000028873.16	chr4	124918465	124939311	-	Cdca8	-1.576676731	7.10E-10	5.13E-08	2180	2012	1858	723	697	746	5.225040056	5.279615517	5.199824997	3.725476315	3.618990212	3.632134409	Cdca8	ENSMUSG00000028873	52276	cell division cycle associated 8
ENSMUSG00000027221.5	chr2	92599707	92615250	+	Chst1	-8.449802543	7.17E-10	5.16E-08	2212	2244	2245	8	8	4	5.246058521	5.43702083	5.472723031	-2.68591005	-2.739596353	-3.741939039	Chst1	ENSMUSG00000027221	76969	carbohydrate (keratan sulfate Gal-6) sulfotransferase 1
ENSMUSG00000021488.7	chr13	55209782	55318325	+	Nsd1	2.504504707	7.53E-10	5.35E-08	385	267	340	1811	1937	2244	2.725183831	2.36823753	2.751413012	5.049596199	5.092921401	5.22031434	Nsd1	ENSMUSG00000021488	18193	nuclear receptor-binding SET-domain protein 1
ENSMUSG00000025912.16	chr1	9667415	9700209	-	Mybl1	-1.814163926	7.47E-10	5.35E-08	3891	3006	3271	993	1076	1010	6.060707422	5.858711692	6.01563858	4.183003266	4.24507341	4.068989566	Mybl1	ENSMUSG00000025912	17864	myeloblastosis oncogene-like 1
ENSMUSG00000039693.11	chr4	48539935	48561919	+	Msantd3	2.919117567	7.51E-10	5.35E-08	108	131	112	916	954	957	0.896148013	1.343761438	1.153683215	4.066618179	4.071542193	3.991264636	Msantd3	ENSMUSG00000039693	66665	Myb/SANT-like DNA-binding domain containing 3
ENSMUSG00000036002.12	chr4	43032414	43046220	-	Fam214b	1.683880728	7.63E-10	5.39E-08	859	884	807	2888	2905	2957	3.88195061	4.093560782	3.997220474	5.722731888	5.677511545	5.618298412	Fam214b	ENSMUSG00000036002	230088	family with sequence similarity 214, member B
ENSMUSG00000030748.9	chr7	125552120	125579474	+	Il4ra	-2.294496917	7.79E-10	5.48E-08	1020	978	863	212	204	206	4.129657248	4.23927049	4.093954392	1.95794614	1.848897839	1.778133931	Il4ra	ENSMUSG00000030748	16190	interleukin 4 receptor, alpha
ENSMUSG00000053846.4	chr18	74939322	74961263	-	Lipg	6.678326544	7.86E-10	5.50E-08	7	11	5	790	876	895	-2.958512624	-2.171595595	-3.200666357	3.853248761	3.948551086	3.894685581	Lipg	ENSMUSG00000053846	16891	lipase, endothelial
ENSMUSG00000027737.10	chr3	49892526	50443614	-	Slc7a11	1.877299464	7.93E-10	5.52E-08	1854	1436	1647	5637	6734	7022	4.991411333	4.793184726	5.025964774	6.687466922	6.890295928	6.865904963	Slc7a11	ENSMUSG00000027737	26570	solute carrier family 7 (cationic amino acid transporter, y+ system), member 11
ENSMUSG00000034641.2	chr11	114982274	114989922	-	Cd300ld	1.429155287	8.00E-10	5.52E-08	4976	4438	4579	11990	13919	14482	6.415512509	6.420698931	6.500876399	7.776231308	7.937760575	7.910159004	Cd300ld	ENSMUSG00000034641	217305	CD300 molecule like family member d
ENSMUSG00000037960.10	chr13	49202951	49216026	-	Card19	1.461210243	7.97E-10	5.52E-08	1883	1864	1761	5383	5286	5540	5.013797099	5.169415531	5.122490784	6.620955817	6.541037973	6.523936421	Card19	ENSMUSG00000037960	68480	caspase recruitment domain family, member 19
ENSMUSG00000005470.8	chr8	83955507	83970197	+	Asf1b	-1.917132543	8.06E-10	5.53E-08	3643	3487	3408	1029	1040	922	5.965706056	6.07281995	6.074823292	4.234355223	4.196002055	3.93754106	Asf1b	ENSMUSG00000005470	66929	anti-silencing function 1B histone chaperone
ENSMUSG00000022322.8	chr8	4735976	4779567	-	Shcbp1	-3.047921019	8.15E-10	5.53E-08	2237	1795	1773	209	215	337	5.262268748	5.115012387	5.132285639	1.937433542	1.924484865	2.486879651	Shcbp1	ENSMUSG00000022322	20419	Shc SH2-domain binding protein 1
ENSMUSG00000033880.11	chr11	118392751	118402092	-	Lgals3bp	-1.911303678	8.10E-10	5.53E-08	14113	12510	11844	3602	3142	4245	7.919384966	7.915694278	7.871831702	6.041409824	5.790637835	6.139854716	Lgals3bp	ENSMUSG00000033880	19039	lectin, galactoside-binding, soluble, 3 binding protein
ENSMUSG00000105580.1	chr13	21753445	21753582	+	Gm44454	-2.868306547	8.11E-10	5.53E-08	2145	2223	1900	316	246	363	5.201694966	5.423459138	5.232065334	2.532688798	2.118384642	2.593947513	NA	NA	NA	NA
ENSMUSG00000032220.9	chr9	70207350	70400067	+	Myo1e	1.492363596	8.47E-10	5.70E-08	2499	2169	2106	6486	6278	7650	5.422020592	5.38798932	5.380534225	6.889851629	6.789145016	6.989474282	Myo1e	ENSMUSG00000032220	71602	myosin IE
ENSMUSG00000069910.2	chr11	34809190	34833641	-	Spdl1	-2.001263162	8.46E-10	5.70E-08	1646	1450	1444	370	453	392	4.819783577	4.807177029	4.836256513	2.759956841	2.997899546	2.704684803	Spdl1	ENSMUSG00000069910	70385	spindle apparatus coiled-coil protein 1
ENSMUSG00000009378.3	chr19	34668403	34747289	-	Slc16a12	1.702134116	8.59E-10	5.75E-08	1202	1138	1015	3643	3627	4431	4.366417959	4.457761025	4.327876549	6.057736384	5.997700705	6.201715357	Slc16a12	ENSMUSG00000009378	240638	solute carrier family 16 (monocarboxylic acid transporters), member 12
ENSMUSG00000020674.16	chr12	29938036	30017658	+	Pxdn	-7.58936699	8.92E-10	5.91E-08	452	424	399	3	1	2	2.956370763	3.034463192	2.981953717	-3.966017969	-5.242096694	-4.589935946	Pxdn	ENSMUSG00000020674	69675	peroxidasin
ENSMUSG00000027200.17	chr2	124089969	124667770	+	Sema6d	6.778994317	9.00E-10	5.91E-08	20	7	19	1571	1764	1778	-1.507851215	-2.788266956	-1.374695757	4.844553665	4.95798452	4.884581218	Sema6d	ENSMUSG00000027200	214968	sema domain, transmembrane domain (TM), and cytoplasmic domain, (semaphorin) 6D
ENSMUSG00000029207.16	chr5	66298703	66618784	-	Apbb2	2.383624428	8.98E-10	5.91E-08	258	238	247	1316	1263	1584	2.148617251	2.202687905	2.291186739	4.589118915	4.476150755	4.717947904	Apbb2	ENSMUSG00000029207	11787	amyloid beta (A4) precursor protein-binding, family B, member 2
ENSMUSG00000032690.16	chr5	120730333	120749853	-	Oas2	-1.564819396	9.01E-10	5.91E-08	4220	3496	3447	1354	1230	1444	6.17779499	6.076538239	6.091236861	4.630171787	4.437969748	4.584490448	Oas2	ENSMUSG00000032690	246728	2'-5' oligoadenylate synthetase 2
ENSMUSG00000041147.10	chr5	150522630	150570329	+	Brca2	-1.773829891	8.97E-10	5.91E-08	4928	3912	4192	1198	1316	1563	6.401529691	6.238717486	6.373497093	4.453641302	4.535432612	4.698699463	Brca2	ENSMUSG00000041147	12190	breast cancer 2, early onset
ENSMUSG00000096807.1	chr13	21722098	21722478	+	Hist1h2bm	-3.802375053	9.18E-10	5.99E-08	1161	1218	987	94	90	74	4.31637022	4.555732985	4.287538962	0.788869533	0.672786693	0.30730448	Hist1h2bm	ENSMUSG00000114279	319186	histone cluster 1, H2bm
ENSMUSG00000026458.13	chr1	134296783	134332928	-	Ppfia4	-2.170187991	9.25E-10	6.01E-08	1320	1215	1036	285	270	290	4.501465367	4.552176627	4.357406425	2.383974044	2.252425589	2.270530313	Ppfia4	ENSMUSG00000026458	68507	protein tyrosine phosphatase, receptor type, f polypeptide (PTPRF), interacting protein (liprin), alpha 4
ENSMUSG00000038518.15	chr13	44729474	44921643	+	Jarid2	1.417572029	9.39E-10	6.07E-08	2031	1911	1846	5263	5188	6116	5.12292643	5.205331934	5.190479571	6.588433842	6.514042605	6.66662659	Jarid2	ENSMUSG00000038518	16468	jumonji, AT rich interactive domain 2
ENSMUSG00000025395.14	chr10	128015168	128030037	+	Prim1	-2.121191378	9.60E-10	6.18E-08	3036	2525	2536	536	732	732	5.702790435	5.607195775	5.648525469	3.294061469	3.689625755	3.604820908	Prim1	ENSMUSG00000025395	19075	DNA primase, p49 subunit
ENSMUSG00000000184.12	chr6	127125162	127152193	-	Ccnd2	-2.3958397	9.88E-10	6.34E-08	975	985	917	194	177	213	4.064594843	4.24955451	4.181466372	1.830253454	1.64461602	1.826228219	Ccnd2	ENSMUSG00000000184	12444	cyclin D2
ENSMUSG00000022391.15	chr15	81704248	81729919	-	Rangap1	-2.285461207	1.02E-09	6.45E-08	6133	6010	5798	1357	1456	1148	6.717091629	6.858111744	6.84136605	4.633363591	4.681230792	4.253671101	Rangap1	ENSMUSG00000022391	19387	RAN GTPase activating protein 1
ENSMUSG00000047757.16	chrX	164980592	164997272	+	Fancb	-2.660548614	1.02E-09	6.45E-08	688	610	579	98	96	123	3.561909625	3.558689934	3.518566875	0.848678928	0.765397843	1.036503191	Fancb	ENSMUSG00000047757	237211	Fanconi anemia, complementation group B
ENSMUSG00000110588.1	chr8	94170748	94173412	-	RP23-98C9.5	2.022755889	1.01E-09	6.45E-08	356	282	328	1397	1358	1433	2.612355047	2.446949506	2.699651585	4.675259676	4.580739656	4.573462148	NA	NA	NA	NA
ENSMUSG00000024727.8	chr19	18749983	18892510	+	Trpm6	4.525175306	1.03E-09	6.47E-08	39	25	20	637	702	707	-0.561622471	-1.022732209	-1.302545971	3.54290864	3.629295221	3.554722297	Trpm6	ENSMUSG00000024727	225997	transient receptor potential cation channel, subfamily M, member 6
ENSMUSG00000034023.16	chr6	113531682	113597017	+	Fancd2	-3.019426399	1.06E-09	6.67E-08	3079	2623	2615	368	272	479	5.723077194	5.662119524	5.692773079	2.752147918	2.263053225	2.993522964	Fancd2	ENSMUSG00000034023	211651	Fanconi anemia, complementation group D2
ENSMUSG00000025747.12	chr5	30058202	30073617	-	Tyms	-1.635418819	1.12E-09	7.00E-08	2423	2074	1976	653	746	829	5.377473148	5.323390391	5.288634264	3.578670534	3.716939256	3.78423413	Tyms	ENSMUSG00000025747	22171	thymidylate synthase
ENSMUSG00000075031.3	chr13	23746790	23747241	+	Hist1h2bb	-2.802103819	1.12E-09	7.00E-08	1241	1362	1278	199	199	195	4.412465327	4.716882963	4.66013847	1.866872045	1.813185742	1.699160756	Hist1h2bb	ENSMUSG00000075031	319178	histone cluster 1, H2bb
ENSMUSG00000059498.13	chr1	171051174	171064935	-	Fcgr3	-2.735291483	1.13E-09	7.04E-08	658	564	611	89	103	101	3.497636411	3.44567222	3.596110713	0.710442886	0.866427763	0.753471876	Fcgr3	ENSMUSG00000059498	14131	Fc receptor, IgG, low affinity III
ENSMUSG00000028211.11	chr4	11156431	11174379	+	Trp53inp1	-1.409785489	1.14E-09	7.06E-08	21643	16789	17864	7258	7612	7666	8.536242978	8.340114095	8.464709939	7.052082833	7.067095413	6.992488336	Trp53inp1	ENSMUSG00000028211	60599	transformation related protein 53 inducible nuclear protein 1
ENSMUSG00000036777.7	chr9	22331214	22389206	-	Anln	-1.607697657	1.18E-09	7.25E-08	4994	4089	3807	1379	1439	1691	6.420721322	6.302551197	6.234530346	4.65655685	4.664292879	4.812223421	Anln	ENSMUSG00000036777	68743	anillin, actin binding protein
ENSMUSG00000023088.16	chr16	14361558	14475737	+	Abcc1	1.173731343	1.21E-09	7.43E-08	6313	5813	5685	13640	14612	14710	6.758821076	6.810033729	6.812973539	7.962236016	8.00785621	7.932694622	Abcc1	ENSMUSG00000023088	17250	ATP-binding cassette, sub-family C (CFTR/MRP), member 1
ENSMUSG00000022978.11	chr16	90719312	90727404	-	Mis18a	-1.888780988	1.25E-09	7.63E-08	2522	2114	2066	568	603	770	5.435235335	5.350943294	5.352875673	3.377643647	3.410150766	3.677787106	Mis18a	ENSMUSG00000022978	66578	MIS18 kinetochore protein A
ENSMUSG00000026509.15	chr1	182467260	182517608	-	Capn2	1.178831695	1.26E-09	7.63E-08	3594	3161	3004	7390	8028	8176	5.946172169	5.931235953	5.892811231	7.078083366	7.143855558	7.085403665	Capn2	ENSMUSG00000026509	12334	calpain 2
ENSMUSG00000050107.2	chr11	73135485	73138294	-	Gsg2	-2.134825585	1.26E-09	7.63E-08	1230	1109	1072	290	288	254	4.399625723	4.420536401	4.406663957	2.409021462	2.345368314	2.079657805	Haspin	ENSMUSG00000050107	14841	histone H3 associated protein kinase
ENSMUSG00000098188.1	chr10	59221953	59226434	+	Sowahc	-1.856977381	1.27E-09	7.69E-08	3569	2924	2929	866	1039	877	5.936103067	5.818816723	5.856340759	3.985683048	4.194614849	3.865391274	Sowahc	ENSMUSG00000098188	268301	sosondowah ankyrin repeat domain family member C
ENSMUSG00000085688.1	chr8	117036497	117043639	+	Gm15395	3.841658187	1.35E-09	8.12E-08	82	68	52	921	1146	1028	0.500918995	0.402874532	0.054147542	4.074467464	4.335961445	4.094462038	Gm15395	NA	102633692	predicted gene 15395
ENSMUSG00000025574.13	chr11	117815526	117826092	-	Tk1	-1.619083453	1.36E-09	8.17E-08	3276	2936	2717	1020	927	1165	5.812536597	5.824724371	5.747966344	4.221687576	4.030144277	4.274869248	Tk1	ENSMUSG00000025574	21877	thymidine kinase 1
ENSMUSG00000020422.13	chr11	8431652	8664535	-	Tns3	1.155609249	1.38E-09	8.19E-08	3282	2797	2770	6679	7078	7286	5.815176076	5.754764865	5.775832676	6.932151506	6.962168763	6.91914624	Tns3	ENSMUSG00000020422	319939	tensin 3
ENSMUSG00000069301.5	chr13	22042460	22042944	-	Hist1h2ag	-3.007619123	1.37E-09	8.19E-08	2290	2501	1887	273	260	354	5.296043628	5.593420186	5.222162953	2.322024131	2.198080368	2.557777776	Hist1h2ag	ENSMUSG00000069301	319167	histone cluster 1, H2ag
ENSMUSG00000039043.5	chr7	79925361	79935359	-	Arpin	2.352682771	1.40E-09	8.27E-08	501	483	455	2307	2442	3176	3.104702671	3.222214528	3.171209268	5.398742041	5.427083653	5.721358263	Arpin	ENSMUSG00000039043	70420	actin-related protein 2/3 complex inhibitor
ENSMUSG00000064288.4	chr13	21750194	21750505	-	Hist1h4k	-2.678743651	1.41E-09	8.34E-08	1596	1631	1488	300	263	230	4.775293618	4.976825721	4.879545531	2.457848289	2.214599957	1.9367589	Hist1h4k	ENSMUSG00000064288	319160	histone cluster 1, H4k
ENSMUSG00000019850.11	chr10	19000910	19015657	-	Tnfaip3	-2.094642273	1.42E-09	8.36E-08	932	818	844	203	234	212	3.999556696	3.981681055	4.061855637	1.895512093	2.046384918	1.81945499	Tnfaip3	ENSMUSG00000019850	21929	tumor necrosis factor, alpha-induced protein 3
ENSMUSG00000016529.5	chr1	131019845	131024974	+	Il10	3.926327931	1.44E-09	8.41E-08	36	33	28	486	508	605	-0.67557866	-0.629068361	-0.827207962	3.152923103	3.16304477	3.330119109	Il10	ENSMUSG00000016529	16153	interleukin 10
ENSMUSG00000105433.1	chr13	22042545	22042682	+	Gm44486	-3.025406433	1.45E-09	8.44E-08	1871	2076	1562	213	231	276	5.004576114	5.324780605	4.949542499	1.964719368	2.027809189	2.199271629	NA	NA	NA	NA
ENSMUSG00000062901.2	chr16	20097554	20127744	+	Klhl24	-1.473649602	1.47E-09	8.53E-08	2720	2354	2401	935	1002	939	5.544252894	5.506047456	5.569622118	4.096220952	4.142327327	3.963885311	Klhl24	ENSMUSG00000062901	75785	kelch-like 24
ENSMUSG00000069302.5	chr13	22035164	22035568	-	Hist1h2ah	-3.014501719	1.47E-09	8.53E-08	2239	2507	1894	266	263	348	5.263557732	5.596876434	5.227503449	2.284618831	2.214599957	2.533150805	Hist1h2ah	ENSMUSG00000069302	319168	histone cluster 1, H2ah
ENSMUSG00000047959.4	chr3	107036169	107038070	+	Kcna3	-3.980058805	1.48E-09	8.53E-08	729	561	599	35	38	55	3.645360949	3.437984661	3.567517968	-0.623625772	-0.560272654	-0.117448174	Kcna3	ENSMUSG00000047959	16491	potassium voltage-gated channel, shaker-related subfamily, member 3
ENSMUSG00000017781.17	chr11	75588097	75628804	+	Pitpna	1.110443688	1.50E-09	8.61E-08	8772	7822	7404	17526	18093	19741	7.233369108	7.238256487	7.194088628	8.32387741	8.316124695	8.357079952	Pitpna	ENSMUSG00000017781	18738	phosphatidylinositol transfer protein, alpha
ENSMUSG00000018500.2	chr11	62248984	62266453	+	Adora2b	2.704948561	1.53E-09	8.75E-08	141	142	129	898	879	1111	1.279255024	1.459660558	1.356710312	4.038001802	3.953480573	4.206428192	Adora2b	ENSMUSG00000018500	11541	adenosine A2b receptor
ENSMUSG00000022360.7	chr15	58094047	58135082	-	Atad2	-1.184589265	1.56E-09	8.86E-08	8729	7731	7584	3444	3882	3988	7.226280088	7.221375074	7.228740384	5.976705971	6.095711015	6.049766522	Atad2	ENSMUSG00000022360	70472	ATPase family, AAA domain containing 2
ENSMUSG00000078762.10	chr7	30653711	30664994	-	Haus5	-1.637090897	1.56E-09	8.88E-08	1548	1388	1383	503	457	525	4.731252448	4.744153911	4.774008953	3.202475077	3.010568739	3.125682913	Haus5	ENSMUSG00000078762	71909	HAUS augmin-like complex, subunit 5
ENSMUSG00000048897.15	chr7	80024814	80094173	+	Zfp710	1.370266951	1.59E-09	8.95E-08	7189	6930	6612	18755	17661	21032	6.946272506	7.063586173	7.030882126	8.421653212	8.281261062	8.448468683	Zfp710	ENSMUSG00000048897	209225	zinc finger protein 710
ENSMUSG00000049539.2	chr13	23763717	23764358	+	Hist1h1a	-2.526800501	1.58E-09	8.95E-08	2147	2170	1921	403	433	330	5.203039197	5.388654156	5.247919285	2.883051972	2.932828989	2.456642421	Hist1h1a	ENSMUSG00000049539	80838	histone cluster 1, H1a
ENSMUSG00000022385.10	chr15	85859707	85876572	+	Gtse1	-1.906244789	1.62E-09	9.05E-08	9936	9369	9062	2793	2901	2426	7.413118836	7.498598795	7.485595399	5.674485214	5.675524019	5.332797104	Gtse1	ENSMUSG00000022385	29870	G two S phase expressed protein 1
ENSMUSG00000041695.2	chr11	111066164	111076821	+	Kcnj2	-1.623411312	1.61E-09	9.05E-08	1874	1583	1743	590	587	624	5.006886891	4.933743601	5.107672673	3.432420358	3.371385847	3.374693721	Kcnj2	ENSMUSG00000041695	16518	potassium inwardly-rectifying channel, subfamily J, member 2
ENSMUSG00000032418.15	chr9	86581371	86695953	-	Me1	1.57022058	1.67E-09	9.32E-08	641	584	549	1706	1850	2087	3.459902236	3.495901663	3.441877695	4.963451808	5.026640226	5.115696441	Me1	ENSMUSG00000032418	17436	malic enzyme 1, NADP(+)-dependent, cytosolic
ENSMUSG00000104608.1	chr13	22035164	22035307	+	Gm44390	-3.008527606	1.68E-09	9.35E-08	1844	2078	1563	217	231	277	4.983610854	5.326169482	4.950465528	1.991498699	2.027809189	2.20447992	NA	NA	NA	NA
ENSMUSG00000018821.3	chr19	42123273	42129059	-	Avpi1	1.73943696	1.69E-09	9.37E-08	678	673	687	2423	2459	2388	3.540801786	3.700376584	3.765117928	5.469503476	5.437090145	5.310025121	Avpi1	ENSMUSG00000018821	69534	arginine vasopressin-induced 1
ENSMUSG00000002504.14	chr17	24639282	24650305	-	Slc9a3r2	1.643763536	1.73E-09	9.54E-08	514	524	505	1646	1734	1771	3.141624048	3.339641411	3.321469306	4.911813905	4.933244931	4.878891709	Slc9a3r2	ENSMUSG00000002504	65962	solute carrier family 9 (sodium/hydrogen exchanger), member 3 regulator 2
ENSMUSG00000033355.6	chr16	23520291	23614222	+	Rtp4	-2.489125057	1.75E-09	9.60E-08	1146	957	819	172	187	193	4.29761742	4.207971126	4.018502163	1.65707966	1.723687591	1.684325715	Rtp4	ENSMUSG00000033355	67775	receptor transporter protein 4
ENSMUSG00000052565.6	chr13	23555087	23555830	+	Hist1h1d	-2.798496008	1.75E-09	9.60E-08	2552	2967	2614	382	480	391	5.452292026	5.839874763	5.692221379	2.805943046	3.081333426	2.701004456	Hist1h1d	ENSMUSG00000052565	14957	histone cluster 1, H1d
ENSMUSG00000041707.7	chr14	32785963	32817968	+	1810011H11Rik	-3.267320629	1.77E-09	9.63E-08	553	458	468	44	55	65	3.247036287	3.145620372	3.211807262	-0.29763946	-0.032643328	0.121558961	1810011H11Rik	ENSMUSG00000041707	69069	RIKEN cDNA 1810011H11 gene
ENSMUSG00000032187.16	chr9	21616169	21704230	+	Smarca4	1.149859998	1.79E-09	9.75E-08	13648	12879	12300	30148	30367	31581	7.871051565	7.957631416	7.926331364	9.106425713	9.063181329	9.034928034	Smarca4	ENSMUSG00000032187	20586	SWI/SNF related, matrix associated, actin dependent regulator of chromatin, subfamily a, member 4
ENSMUSG00000047246.6	chr13	23583742	23621124	-	Hist1h2be	-1.774235752	1.80E-09	9.75E-08	2139	2237	2019	620	698	680	5.197654744	5.432514416	5.319684455	3.503914509	3.621057111	3.498587311	Hist1h2be	ENSMUSG00000047246	319179	histone cluster 1, H2be
ENSMUSG00000028634.16	chr4	119733784	120138045	+	Hivep3	-2.693245375	1.82E-09	9.82E-08	701	588	651	103	95	122	3.588896074	3.505741054	3.687523393	0.920114066	0.750369634	1.024773898	Hivep3	ENSMUSG00000028634	16656	human immunodeficiency virus type I enhancer binding protein 3
ENSMUSG00000026274.11	chr1	93308770	93343482	-	Pask	-1.838982642	1.86E-09	1.00E-07	1228	1188	1047	337	354	342	4.397278923	4.519768637	4.372636553	2.625370801	2.642582623	2.508096137	Pask	ENSMUSG00000026274	269224	PAS domain containing serine/threonine kinase
ENSMUSG00000032068.14	chr9	50494525	50505482	+	Plet1	5.898652164	2.02E-09	1.08E-07	26	15	8	909	983	1058	-1.137482765	-1.740961241	-2.572635134	4.055556936	4.114722048	4.135941513	Plet1	ENSMUSG00000032068	76509	placenta expressed transcript 1
ENSMUSG00000022074.5	chr14	69767472	69784403	+	Tnfrsf10b	2.339386297	2.05E-09	1.09E-07	149	130	124	721	673	794	1.358598455	1.332748445	1.299903956	3.721482693	3.568474941	3.722039369	Tnfrsf10b	ENSMUSG00000022074	21933	tumor necrosis factor receptor superfamily, member 10b
ENSMUSG00000072825.10	chr12	112722174	112746591	+	Cep170b	-1.503375567	2.04E-09	1.09E-07	5217	4870	4911	1984	1825	1854	6.483739761	6.554696619	6.601850008	5.181186956	5.007016759	4.944950512	Cep170b	ENSMUSG00000072825	217882	centrosomal protein 170B
ENSMUSG00000101972.1	chr13	21782960	21783370	-	Hist1h3i	-2.815931361	2.05E-09	1.09E-07	1333	1483	1200	211	208	189	4.51559889	4.83963166	4.569321712	1.951140962	1.876844379	1.654189997	Hist1h3i	ENSMUSG00000101972	319153	histone cluster 1, H3i
ENSMUSG00000028832.11	chr4	134468320	134473843	+	Stmn1	-1.18256308	2.06E-09	1.09E-07	9686	8713	8163	4024	3936	4551	7.37635654	7.393879064	7.334874131	6.201220949	6.115638569	6.240262325	Stmn1	ENSMUSG00000028832	16765	stathmin 1
ENSMUSG00000027115.14	chr2	109280738	109341747	+	Kif18a	-2.44522012	2.08E-09	1.09E-07	779	796	702	155	137	154	3.741001993	3.942373	3.796256439	1.507397879	1.276228614	1.359598987	Kif18a	ENSMUSG00000027115	228421	kinesin family member 18A
ENSMUSG00000037820.15	chr2	158116402	158146436	-	Tgm2	2.296209375	2.09E-09	1.10E-07	196	169	149	918	831	952	1.752982283	1.709983912	1.563903698	4.06976302	3.872513259	3.983711242	Tgm2	ENSMUSG00000037820	21817	transglutaminase 2, C polypeptide
ENSMUSG00000110195.1	chr7	101421691	101512827	+	Pde2a	1.331960881	2.14E-09	1.12E-07	2766	2532	2376	6426	7359	6874	5.568442989	5.611189003	5.554524711	6.876444624	7.018332844	6.83517503	Pde2a	ENSMUSG00000030653	207728	phosphodiesterase 2A, cGMP-stimulated
ENSMUSG00000085310.7	chr11	87121567	87126958	-	Gm11491	-2.06076026	2.18E-09	1.13E-07	859	759	722	183	185	232	3.88195061	3.873748603	3.836755802	1.746263361	1.708216182	1.949222865	NA	NA	NA	NA
ENSMUSG00000000134.17	chrX	7762560	7775202	+	Tfe3	-1.446755558	2.21E-09	1.15E-07	6133	5233	5262	2122	1954	2458	6.717091629	6.658402832	6.701434637	5.278175947	5.105524675	5.351698599	Tfe3	ENSMUSG00000000134	209446	transcription factor E3
ENSMUSG00000006800.13	chr2	166073089	166155663	-	Sulf2	-1.737807888	2.22E-09	1.15E-07	1225	1042	1104	360	363	356	4.39375155	4.330674117	4.449079728	2.720482558	2.67875236	2.565894226	Sulf2	ENSMUSG00000006800	72043	sulfatase 2
ENSMUSG00000027555.8	chr3	14641727	14663002	+	Car13	-2.618002495	2.27E-09	1.17E-07	881	659	676	122	134	127	3.91841354	3.670071298	3.741848148	1.163265048	1.244403168	1.082489396	Car13	ENSMUSG00000027555	71934	carbonic anhydrase 13
ENSMUSG00000053113.3	chr11	117966079	117970047	-	Socs3	1.636407733	2.28E-09	1.17E-07	3087	2812	2765	9546	10369	8917	5.726820202	5.76247983	5.773226651	7.447383293	7.512999517	7.210559555	Socs3	ENSMUSG00000053113	12702	suppressor of cytokine signaling 3
ENSMUSG00000022010.19	chr14	76414961	76507765	+	Tsc22d1	2.113254345	2.30E-09	1.18E-07	850	735	669	3095	3180	4224	3.866764206	3.82742398	3.72684227	5.822583853	5.807978677	6.132700842	Tsc22d1	ENSMUSG00000022010	21807	TSC22 domain family, member 1
ENSMUSG00000026207.16	chr1	75375297	75432320	+	Speg	-2.303885714	2.36E-09	1.20E-07	633	611	579	130	120	144	3.44179759	3.561051137	3.518566875	1.254533105	1.085830142	1.263061642	Speg	ENSMUSG00000026207	11790	SPEG complex locus
ENSMUSG00000028933.11	chr5	25689812	25705825	-	Xrcc2	-1.984818423	2.36E-09	1.20E-07	815	751	696	209	200	201	3.806137847	3.858471743	3.783881567	1.937433542	1.820399232	1.742771988	Xrcc2	ENSMUSG00000028933	57434	X-ray repair complementing defective repair in Chinese hamster cells 2
ENSMUSG00000032440.12	chr9	116087698	116175363	-	Tgfbr2	1.130098522	2.35E-09	1.20E-07	6424	5542	5409	12646	13133	14886	6.783965243	6.741163599	6.741181561	7.853077653	7.853904622	7.949852937	Tgfbr2	ENSMUSG00000032440	21813	transforming growth factor, beta receptor II
ENSMUSG00000055561.9	chr18	43963235	44022501	+	Spink5	-2.069872377	2.35E-09	1.20E-07	2049	1519	1563	383	422	496	5.135653055	4.874223408	4.950465528	2.809709876	2.895748337	3.043785867	Spink5	ENSMUSG00000055561	72432	serine peptidase inhibitor, Kazal type 5
ENSMUSG00000025854.15	chr5	138754514	138810077	+	Fam20c	-4.74035957	2.37E-09	1.20E-07	369	333	344	10	15	16	2.664027335	2.6863854	2.768262197	-2.381055469	-1.872862884	-1.867469921	Fam20c	ENSMUSG00000025854	80752	family with sequence similarity 20, member C
ENSMUSG00000022390.10	chr15	81744848	81796269	+	Zc3h7b	-1.294094704	2.39E-09	1.20E-07	4909	4739	4643	2054	2091	2088	6.395957168	6.515361602	6.520898944	5.231198724	5.203263088	5.116387387	Zc3h7b	ENSMUSG00000022390	20286	zinc finger CCCH type containing 7B
ENSMUSG00000074476.5	chr9	21755442	21760286	-	Spc24	-1.679701366	2.39E-09	1.20E-07	1408	1283	1240	411	475	427	4.594540629	4.630710029	4.616608044	2.911375729	3.066242337	2.827916569	Spc24	ENSMUSG00000074476	67629	SPC24, NDC80 kinetochore complex component, homolog (S. cerevisiae)
ENSMUSG00000037447.16	chr1	36307733	36324029	+	Arid5a	-1.965269136	2.47E-09	1.23E-07	855	747	780	198	208	246	3.875220825	3.850772218	3.948156846	1.859622306	1.876844379	2.033579796	Arid5a	ENSMUSG00000037447	214855	AT rich interactive domain 5A (MRF1-like)
ENSMUSG00000001517.14	chr6	128362967	128376146	+	Foxm1	-1.738936111	2.51E-09	1.25E-07	3733	3224	3140	1080	923	1245	6.000909796	5.959702203	5.956680578	4.304110465	4.023908957	4.370645265	Foxm1	ENSMUSG00000001517	14235	forkhead box M1
ENSMUSG00000026796.16	chr2	32876114	32925254	+	Fam129b	1.249936101	2.52E-09	1.25E-07	8697	8351	8024	21307	21296	21149	7.220981839	7.332662075	7.310097811	8.60570082	8.551269534	8.456471895	Fam129b	ENSMUSG00000026796	227737	family with sequence similarity 129, member B
ENSMUSG00000026177.11	chr1	74375195	74386062	+	Slc11a1	1.439759566	2.54E-09	1.25E-07	3797	3711	3460	10426	11185	10210	6.02543103	6.162629102	6.096666814	7.574594439	7.622282933	7.405901854	Slc11a1	ENSMUSG00000026177	18173	solute carrier family 11 (proton-coupled divalent metal ion transporters), member 1
ENSMUSG00000017491.8	chr14	16430842	16575472	-	Rarb	-2.608099044	2.61E-09	1.29E-07	604	592	561	103	89	116	3.37419531	3.515513793	3.473044237	0.920114066	0.656756583	0.952322104	Rarb	ENSMUSG00000017491	218772	retinoic acid receptor, beta
ENSMUSG00000038648.5	chr6	37327255	37442146	-	Creb3l2	1.903030172	2.67E-09	1.31E-07	559	471	465	1969	1767	2262	3.262591102	3.18595641	3.202539382	5.17024081	4.960435305	5.231838036	Creb3l2	ENSMUSG00000038648	208647	cAMP responsive element binding protein 3-like 2
ENSMUSG00000103588.1	chr1	173986926	174001972	-	Gm18445	3.806165061	2.66E-09	1.31E-07	50	51	40	597	757	776	-0.207191737	-0.008657024	-0.320247973	3.449422011	3.738042884	3.688978074	Gm18445	NA	100417201	interferon activated gene 204 pseudogene
ENSMUSG00000024791.10	chr19	6084983	6091777	+	Cdca5	-2.471784673	2.74E-09	1.34E-07	1111	1176	963	198	228	199	4.252889014	4.505128054	4.252042881	1.859622306	2.008991161	1.728380895	Cdca5	ENSMUSG00000024791	67849	cell division cycle associated 5
ENSMUSG00000062980.15	chr6	21985916	22256404	+	Cped1	-3.692938265	2.77E-09	1.35E-07	705	518	556	54	41	51	3.597099053	3.323042628	3.460139902	-0.005188567	-0.452019763	-0.225363514	Cped1	ENSMUSG00000062980	214642	cadherin-like and PC-esterase domain containing 1
ENSMUSG00000020661.15	chr12	3806007	3914443	+	Dnmt3a	-1.04479617	2.83E-09	1.37E-07	6586	5996	5841	3029	3181	3336	6.819893101	6.854747417	6.852025186	5.791491099	5.808432212	5.792255748	Dnmt3a	ENSMUSG00000020661	13435	DNA methyltransferase 3A
ENSMUSG00000081058.5	chr3	96238108	96239127	-	Hist2h3c2	-3.254727575	2.82E-09	1.37E-07	459	467	432	51	53	47	2.978517832	3.173665004	3.096458347	-0.086872364	-0.085592208	-0.342008433	Hist2h3c2	ENSMUSG00000081058	97114	histone cluster 2, H3c2
ENSMUSG00000041827.15	chr5	114923240	114937915	+	Oasl1	1.425702534	2.84E-09	1.37E-07	1213	1267	1130	3361	3464	3530	4.379555174	4.612612481	4.482647301	5.941516543	5.931372247	5.873792761	Oasl1	ENSMUSG00000041827	231655	2'-5' oligoadenylate synthetase-like 1
ENSMUSG00000070327.14	chr11	119393100	119487418	+	Rnf213	-1.060993715	2.90E-09	1.40E-07	21518	19179	19006	10003	10171	10390	8.527886675	8.532119939	8.554107292	7.514844343	7.485185636	7.431113418	Rnf213	ENSMUSG00000070327	672511	ring finger protein 213
ENSMUSG00000000732.8	chr10	78069360	78079525	+	Icosl	-3.588964613	2.94E-09	1.41E-07	541	452	415	34	38	53	3.215414308	3.126616431	3.038606691	-0.664848435	-0.560272654	-0.170397054	Icosl	ENSMUSG00000000732	50723	icos ligand
ENSMUSG00000025810.9	chr8	128358604	128503363	+	Nrp1	2.445547559	2.97E-09	1.42E-07	233	220	216	1241	1149	1534	2.00187552	2.089477294	2.098125239	4.504495655	4.339731556	4.67168889	Nrp1	ENSMUSG00000025810	18186	neuropilin 1
ENSMUSG00000026285.7	chr1	94038305	94052553	-	Pdcd1	1.099746011	3.00E-09	1.42E-07	3016	2651	2594	6184	6334	6384	5.693256648	5.677435482	5.681142845	6.821068355	6.801955838	6.728493884	Pdcd1	ENSMUSG00000026285	18566	programmed cell death 1
ENSMUSG00000050493.8	chr4	129576815	129578549	-	Fam167b	1.436722005	3.00E-09	1.42E-07	1338	1336	1282	3540	4042	3877	4.520998204	4.689086571	4.664645135	6.01636451	6.153972864	6.009047025	Fam167b	ENSMUSG00000050493	230766	family with sequence similarity 167, member B
ENSMUSG00000028312.19	chr4	52439243	52488260	+	Smc2	-1.386298653	3.16E-09	1.49E-07	11165	9316	9168	3622	3862	4666	7.581357018	7.490414802	7.502372032	6.049397083	6.088260023	6.276261139	Smc2	ENSMUSG00000028312	14211	structural maintenance of chromosomes 2
ENSMUSG00000050439.6	chr15	80452240	80560470	-	Enthd1	4.247342781	3.16E-09	1.49E-07	29	24	21	460	475	596	-0.98276017	-1.080447707	-1.233833221	3.073684455	3.066242337	3.308514287	Enthd1	ENSMUSG00000050439	383075	ENTH domain containing 1
ENSMUSG00000006585.3	chr8	122568015	122573554	+	Cdt1	-1.37843618	3.29E-09	1.55E-07	4755	4586	4238	1919	1847	1819	6.349978101	6.468020373	6.389240096	5.133141953	5.024299455	4.917462295	Cdt1	ENSMUSG00000006585	67177	chromatin licensing and DNA replication factor 1
ENSMUSG00000002227.15	chr3	104794836	104818563	-	Mov10	-1.294756247	3.38E-09	1.58E-07	3489	3269	2975	1395	1314	1533	5.903401397	5.979696757	5.878818427	4.673193518	4.533239232	4.67074841	Mov10	ENSMUSG00000002227	17454	Moloney leukemia virus 10
ENSMUSG00000069310.3	chr13	23745013	23745501	-	Hist1h3c	-3.506192524	3.38E-09	1.58E-07	806	871	664	72	76	70	3.790127504	4.072199303	3.716027414	0.406536199	0.430328648	0.227687312	Hist1h3c	ENSMUSG00000069310	319148	histone cluster 1, H3c
ENSMUSG00000032802.8	chr2	152105516	152111376	+	Srxn1	1.482075377	3.44E-09	1.60E-07	1383	1303	1172	3693	4107	3720	4.568703709	4.653017316	4.535274232	6.077399971	6.176985666	5.949416763	Srxn1	ENSMUSG00000032802	76650	sulfiredoxin 1 homolog (S. cerevisiae)
ENSMUSG00000023942.15	chr17	45585200	45599606	-	Slc29a1	-1.358513334	3.54E-09	1.64E-07	3805	3396	3512	1510	1360	1603	6.028467085	6.034675588	6.118184534	4.787437577	4.582862047	4.735144598	Slc29a1	ENSMUSG00000023942	63959	solute carrier family 29 (nucleoside transporters), member 1
ENSMUSG00000041193.15	chr4	138799244	138863482	-	Pla2g5	1.971190481	3.54E-09	1.64E-07	1289	1078	1152	4491	4373	6015	4.467192838	4.37965291	4.51045306	6.359608727	6.267513384	6.642604901	Pla2g5	ENSMUSG00000041193	18784	phospholipase A2, group V
ENSMUSG00000035919.16	chr9	22475715	22888280	+	Bbs9	1.57054166	3.59E-09	1.66E-07	419	363	331	1094	1170	1269	2.847123781	2.810654003	2.712767084	4.322683348	4.365850025	4.398180639	Bbs9	ENSMUSG00000035919	319845	Bardet-Biedl syndrome 9 (human)
ENSMUSG00000032826.17	chr3	126921612	127499350	-	Ank2	2.127613891	3.61E-09	1.66E-07	248	177	200	906	923	1085	2.091698822	1.776517663	1.987360451	4.050790318	4.023908957	4.17227997	Ank2	ENSMUSG00000032826	109676	ankyrin 2, brain
ENSMUSG00000034266.5	chr12	85686669	85709087	+	Batf	-7.399550739	3.63E-09	1.66E-07	502	450	409	4	3	1	3.107576567	3.120225745	3.017621666	-3.60344789	-4.019704272	-5.32690154	Batf	ENSMUSG00000034266	53314	basic leucine zipper transcription factor, ATF-like
ENSMUSG00000023908.7	chr17	23726336	23736729	+	Pkmyt1	-1.50550688	3.78E-09	1.73E-07	2376	2379	2167	896	820	891	5.349219467	5.521285188	5.421718302	4.034786881	3.853300329	3.888226947	Pkmyt1	ENSMUSG00000023908	268930	protein kinase, membrane associated tyrosine/threonine 1
ENSMUSG00000027424.11	chr2	144270663	144281227	+	Mgme1	-1.34540339	3.84E-09	1.75E-07	2066	1891	1848	763	769	914	5.147570429	5.19015751	5.192041352	3.803111455	3.760718322	3.924975319	Mgme1	ENSMUSG00000027424	74528	mitochondrial genome maintenance exonuclease 1
ENSMUSG00000026478.14	chr1	153218922	153332786	-	Lamc1	1.410367579	3.85E-09	1.75E-07	6244	5046	5111	15087	13992	17546	6.742967125	6.605909887	6.65943303	8.107693259	7.945306933	8.187031624	Lamc1	ENSMUSG00000026478	226519	laminin, gamma 1
ENSMUSG00000025314.16	chr2	90429754	90580647	-	Ptprj	1.023581313	3.90E-09	1.77E-07	6322	5434	5385	11844	12024	13363	6.760876197	6.71277404	6.734766602	7.758556787	7.726630091	7.794146249	Ptprj	ENSMUSG00000025314	19271	protein tyrosine phosphatase, receptor type, J
ENSMUSG00000073490.10	chr1	173723430	173741809	-	AI607873	-2.526676339	3.94E-09	1.78E-07	757	621	638	107	112	157	3.699698859	3.58445303	3.658444834	0.974819958	0.986721997	1.387343978	Ifi207	ENSMUSG00000073490	226691	interferon activated gene 207
ENSMUSG00000056531.11	chr5	108132875	108233628	+	Ccdc18	-2.345087358	3.95E-09	1.78E-07	648	516	580	113	120	132	3.475559545	3.317466988	3.521054281	1.053175596	1.085830142	1.137984509	Ccdc18	ENSMUSG00000056531	73254	coiled-coil domain containing 18
ENSMUSG00000057193.7	chr9	21337828	21355025	+	Slc44a2	1.211412169	4.00E-09	1.80E-07	1940	1655	1561	4101	4013	4639	5.056809498	4.997893744	4.948618878	6.228563022	6.143585988	6.267889578	Slc44a2	ENSMUSG00000057193	68682	solute carrier family 44, member 2
ENSMUSG00000021811.6	chr14	20384638	20388910	-	Dnajc9	-1.321717743	4.05E-09	1.81E-07	4982	4307	4223	1839	1757	2194	6.41725087	6.37747753	6.38412536	5.07172507	4.95224978	5.187812514	Dnajc9	ENSMUSG00000021811	108671	DnaJ heat shock protein family (Hsp40) member C9
ENSMUSG00000033762.7	chr15	76703553	76710559	-	Recql4	-2.162448979	4.04E-09	1.81E-07	1482	1548	1347	343	388	317	4.66841317	4.901498117	4.735971582	2.650793397	2.774711594	2.398748741	Recql4	ENSMUSG00000033762	79456	RecQ protein-like 4
ENSMUSG00000053580.16	chr11	105589986	105929304	+	Tanc2	2.531410604	4.07E-09	1.82E-07	208	181	163	1150	984	1296	1.838500354	1.808668187	1.69304885	4.394672377	4.116188202	4.42854245	Tanc2	ENSMUSG00000053580	77097	tetratricopeptide repeat, ankyrin repeat and coiled-coil containing 2
ENSMUSG00000024677.13	chr19	11516512	11531256	+	Ms4a6b	-2.417783352	4.10E-09	1.82E-07	692	551	530	112	127	114	3.570267042	3.412059524	3.391110965	1.0404083	1.167294243	0.927339747	Ms4a6b	ENSMUSG00000024677	69774	membrane-spanning 4-domains, subfamily A, member 6B
ENSMUSG00000027074.14	chr2	84936579	84958509	+	Slc43a3	-1.761590561	4.12E-09	1.82E-07	2244	2231	2161	661	778	660	5.266775162	5.42864054	5.417719145	3.596224455	3.777494035	3.45555071	Slc43a3	ENSMUSG00000027074	58207	solute carrier family 43, member 3
ENSMUSG00000028926.15	chr5	4803391	5420312	-	Cdk14	1.387889476	4.12E-09	1.82E-07	991	841	962	2523	2583	2696	4.088065743	4.02166191	4.250544755	5.52783748	5.508051974	5.485008278	Cdk14	ENSMUSG00000028926	18647	cyclin-dependent kinase 14
ENSMUSG00000042684.8	chr1	153503015	153550045	-	Npl	1.858828176	4.14E-09	1.83E-07	297	256	252	915	1089	1127	2.351342639	2.307657464	2.320041602	4.065043184	4.262391287	4.227047677	Npl	ENSMUSG00000042684	74091	N-acetylneuraminate pyruvate lyase
ENSMUSG00000051278.12	chr3	127553489	127618023	+	Zgrf1	-1.443514559	4.28E-09	1.88E-07	2044	1744	1909	693	720	826	5.132129128	5.073440331	5.238881229	3.664379181	3.665795426	3.779006968	Zgrf1	ENSMUSG00000051278	71643	zinc finger, GRF-type containing 1
ENSMUSG00000021262.14	chr12	108554720	108688513	+	Evl	-1.601938117	4.30E-09	1.88E-07	2796	2489	2405	825	815	1083	5.584003396	5.586482749	5.572023108	3.915751514	3.844481872	4.169619397	Evl	ENSMUSG00000021262	14026	Ena-vasodilator stimulated phosphoprotein
ENSMUSG00000022394.14	chr15	81663889	81688315	+	L3mbtl2	-1.253728153	4.41E-09	1.93E-07	3086	2688	2499	1223	1249	1228	5.726352857	5.697428205	5.627325836	4.483425495	4.460075992	4.350818102	L3mbtl2	ENSMUSG00000022394	214669	L3MBTL2 polycomb repressive complex 1 subunit
ENSMUSG00000041773.7	chr13	97241105	97253039	+	Enc1	-1.150320025	4.42E-09	1.93E-07	3145	2778	2804	1302	1368	1536	5.753670428	5.744932974	5.793429892	4.573694766	4.591320525	4.673568011	Enc1	ENSMUSG00000041773	13803	ectodermal-neural cortex 1
ENSMUSG00000019866.13	chr10	43950307	44148853	-	Aim1	1.070404672	4.45E-09	1.93E-07	3276	2732	2716	6137	6381	7045	5.812536597	5.720848229	5.747435356	6.810062513	6.812620666	6.870622338	Crybg1	ENSMUSG00000019866	11630	crystallin beta-gamma domain containing 1
ENSMUSG00000030107.10	chr6	121245906	121270917	+	Usp18	-2.7912406	4.54E-09	1.96E-07	1028	872	720	110	147	146	4.140922859	4.07385377	3.832756644	1.014529668	1.37751195	1.282892814	Usp18	ENSMUSG00000030107	24110	ubiquitin specific peptidase 18
ENSMUSG00000041202.12	chr4	138775735	138782046	+	Pla2g2d	5.788583945	4.53E-09	1.96E-07	14	18	17	909	870	1196	-2.007422224	-1.485704185	-1.530814959	4.055556936	3.938641293	4.312740641	Pla2g2d	ENSMUSG00000041202	18782	phospholipase A2, group IID
ENSMUSG00000069274.3	chr13	23551258	23551648	-	Hist1h4f	-2.226886168	4.52E-09	1.96E-07	1859	1941	1841	432	485	379	4.995295813	5.227798441	5.186567706	2.983183431	3.096268291	2.656092035	Hist1h4f	ENSMUSG00000069274	319157	histone cluster 1, H4f
ENSMUSG00000038047.18	chr4	86578855	86612055	-	Haus6	-1.30563829	4.62E-09	1.98E-07	2079	1874	1898	772	887	873	5.15661775	5.177132559	5.230546308	3.820018231	3.966544115	3.858799852	Haus6	ENSMUSG00000038047	230376	HAUS augmin-like complex, subunit 6
ENSMUSG00000032344.17	chr9	78430526	78443237	-	Mb21d1	-1.14793211	4.72E-09	2.02E-07	3490	3163	2867	1464	1483	1639	5.903814777	5.932148329	5.825479795	4.742819586	4.707730017	4.767176146	Mb21d1	ENSMUSG00000032344	214763	Mab-21 domain containing 1
ENSMUSG00000054342.8	chr7	24370263	24386690	+	Kcnn4	1.197086016	4.73E-09	2.02E-07	2644	2586	2384	6190	6231	6230	5.503376041	5.641627925	5.559373092	6.822467332	6.77830457	6.693268189	Kcnn4	ENSMUSG00000054342	16534	potassium intermediate/small conductance calcium-activated channel, subfamily N, member 4
ENSMUSG00000096916.7	chr7	27984854	28014115	-	Zfp850	-1.588824713	4.79E-09	2.04E-07	1619	1348	1395	498	557	495	4.795929533	4.701982255	4.786468433	3.188076803	3.2957688	3.040877206	Zfp850	ENSMUSG00000096916	100043772	zinc finger protein 850
ENSMUSG00000032115.13	chr9	44379490	44392369	+	Hyou1	1.353958893	4.81E-09	2.04E-07	11684	10079	10024	27522	26181	33499	7.64690516	7.603978903	7.631144684	8.974951011	8.84920094	9.119987901	Hyou1	ENSMUSG00000032115	12282	hypoxia up-regulated 1
ENSMUSG00000032020.15	chr9	41011098	41161697	-	Ubash3b	1.073161447	4.88E-09	2.07E-07	1708	1494	1516	3440	3459	3708	4.873111313	4.850289631	4.906431807	5.975029637	5.929288631	5.944756013	Ubash3b	ENSMUSG00000032020	72828	ubiquitin associated and SH3 domain containing, B
ENSMUSG00000070691.10	chr4	135120652	135177990	+	Runx3	-6.251707699	4.90E-09	2.07E-07	359	289	274	3	3	6	2.624444741	2.482261987	2.440564363	-3.966017969	-4.019704272	-3.211424323	Runx3	ENSMUSG00000070691	12399	runt related transcription factor 3
ENSMUSG00000031613.9	chr8	56294585	56321043	+	Hpgd	-8.819310953	4.94E-09	2.08E-07	1605	1363	1168	3	6	1	4.78340373	4.717941434	4.530344043	-3.966017969	-3.126619476	-5.32690154	Hpgd	ENSMUSG00000031613	15446	hydroxyprostaglandin dehydrogenase 15 (NAD)
ENSMUSG00000079685.9	chr10	7444873	7473477	-	Ulbp1	-1.433700572	4.97E-09	2.09E-07	1419	1170	1166	458	487	538	4.605763914	4.497751668	4.527872616	3.067405032	3.102199214	3.160938494	Ulbp1	ENSMUSG00000079685	77777	UL16 binding protein 1
ENSMUSG00000019214.13	chr17	25718926	25727419	-	Chtf18	-1.749871939	5.08E-09	2.12E-07	1172	1192	1154	336	381	401	4.329968988	4.524616	4.512954482	2.621089803	2.748480053	2.737392137	Chtf18	ENSMUSG00000019214	214901	CTF18, chromosome transmission fidelity factor 18
ENSMUSG00000027654.2	chr2	158768093	158786637	+	Fam83d	-4.109662395	5.07E-09	2.12E-07	489	448	429	30	36	20	3.06976183	3.113806624	3.086416345	-0.842635554	-0.637234635	-1.554312036	Fam83d	ENSMUSG00000027654	71878	family with sequence similarity 83, member D
ENSMUSG00000034773.16	chr11	102248882	102265187	+	BC030867	-3.053073839	5.05E-09	2.12E-07	854	808	765	78	95	147	3.873533462	3.963946412	3.920160592	0.521247857	0.750369634	1.292707103	BC030867	ENSMUSG00000034773	217216	cDNA sequence BC030867
ENSMUSG00000053289.7	chr9	53098454	53248112	-	Ddx10	1.104984186	5.16E-09	2.14E-07	2433	2053	2114	4751	4888	5542	5.38341384	5.308711681	5.386002869	6.440794423	6.428116943	6.524457109	Ddx10	ENSMUSG00000053289	77591	DEAD (Asp-Glu-Ala-Asp) box polypeptide 10
ENSMUSG00000005087.17	chr2	102811141	102901665	-	Cd44	1.07695155	5.24E-09	2.17E-07	17504	14719	14960	33025	34315	39091	8.230035013	8.150283494	8.208772797	9.237919892	9.239513561	9.342703283	Cd44	ENSMUSG00000005087	12505	CD44 antigen
ENSMUSG00000031410.14	chrX	135579555	135598777	-	Nxf7	5.204366703	5.35E-09	2.21E-07	65	51	77	2312	2115	3234	0.168019782	-0.008657024	0.61602643	5.401864759	5.219723776	5.747462957	Nxf7	ENSMUSG00000031410	170722	nuclear RNA export factor 7
ENSMUSG00000028124.15	chr3	122245557	122270732	+	Gclm	1.369699614	5.38E-09	2.22E-07	1657	1598	1340	3885	4447	4343	4.829389936	4.947345478	4.728457528	6.150511655	6.291719696	6.172778281	Gclm	ENSMUSG00000028124	14630	glutamate-cysteine ligase, modifier subunit
ENSMUSG00000045349.15	chr4	138250403	138261332	+	Sh2d5	3.572752014	5.40E-09	2.22E-07	67	84	42	757	826	803	0.211412378	0.705721885	-0.25070704	3.791729187	3.863811815	3.738290173	Sh2d5	ENSMUSG00000045349	230863	SH2 domain containing 5
ENSMUSG00000056498.13	chr3	84666192	84704575	+	Tmem154	-2.437665338	5.46E-09	2.23E-07	916	742	881	152	150	199	3.974587851	3.841089665	4.123718784	1.479292541	1.406560482	1.728380895	Tmem154	ENSMUSG00000056498	320782	transmembrane protein 154
ENSMUSG00000074794.9	chr13	80883384	80896035	+	Arrdc3	-1.257228579	5.46E-09	2.23E-07	2825	2366	2446	1068	1200	1144	5.598887255	5.513381656	5.596405592	4.287998301	4.402360494	4.248637707	Arrdc3	ENSMUSG00000074794	105171	arrestin domain containing 3
ENSMUSG00000016382.15	chrX	75785654	75875182	-	Pls3	1.139687284	5.49E-09	2.24E-07	1540	1346	1298	3074	3411	3365	4.723779748	4.699840963	4.682532323	5.8127632	5.909131307	5.8047411	Pls3	ENSMUSG00000016382	102866	plastin 3 (T-isoform)
ENSMUSG00000031666.15	chr8	91070057	91123844	+	Rbl2	-1.083556307	5.60E-09	2.28E-07	5109	4227	4375	2146	2332	2427	6.453563186	6.350431488	6.435134196	5.294397566	5.360602171	5.333391539	Rbl2	ENSMUSG00000031666	19651	RB transcriptional corepressor like 2
ENSMUSG00000020021.4	chr10	94036001	94145339	+	Fgd6	1.67949459	5.74E-09	2.33E-07	1470	1247	1183	3983	4103	5350	4.65668785	4.589666549	4.548746015	6.186447968	6.175580044	6.47359396	Fgd6	ENSMUSG00000020021	13998	FYVE, RhoGEF and PH domain containing 6
ENSMUSG00000094338.1	chr13	21715763	21716143	-	Hist1h2bl	-3.144697951	5.75E-09	2.33E-07	456	455	418	48	65	48	2.969067831	3.136149693	3.048985837	-0.173460049	0.206363807	-0.311951199	Hist1h2bl	ENSMUSG00000094338	319185	histone cluster 1, H2bl
ENSMUSG00000001525.10	chr17	35833921	35838306	-	Tubb5	-1.052862724	5.94E-09	2.40E-07	47510	45513	43058	22114	23978	24075	9.67055555	9.778849363	9.733912466	8.659332112	8.722394598	8.643414099	Tubb5	ENSMUSG00000001525	22154	tubulin, beta 5 class I
ENSMUSG00000015305.6	chr10	8722219	8886070	-	Sash1	1.136176022	6.15E-09	2.47E-07	2473	2085	2080	4809	5009	5793	5.406934965	5.331020046	5.362616597	6.458298311	6.463391705	6.588355424	Sash1	ENSMUSG00000015305	70097	SAM and SH3 domain containing 1
ENSMUSG00000028438.16	chr4	41390745	41464887	-	Kif24	-1.268067069	6.16E-09	2.47E-07	1658	1456	1372	626	642	721	4.830260077	4.813132435	4.762492458	3.517797808	3.50049345	3.582991544	Kif24	ENSMUSG00000028438	109242	kinesin family member 24
ENSMUSG00000038930.11	chr7	80293229	80324454	-	Rccd1	-1.792311534	6.19E-09	2.47E-07	2931	2615	2255	742	707	966	5.652020122	5.657713504	5.479133595	3.762874324	3.639527143	4.004761881	Rccd1	ENSMUSG00000038930	269955	RCC1 domain containing 1
ENSMUSG00000050721.8	chr9	65554386	65580040	-	Plekho2	1.053162951	6.20E-09	2.47E-07	6752	6377	6117	13657	14659	14388	6.8558028	6.943617727	6.918628505	7.964032911	8.012489083	7.900764538	Plekho2	ENSMUSG00000050721	102595	pleckstrin homology domain containing, family O member 2
ENSMUSG00000061991.2	chr13	23533906	23534304	+	Hist1h2af	-3.222755856	6.20E-09	2.47E-07	518	561	496	49	69	62	3.15279696	3.437984661	3.295551932	-0.144016271	0.291881878	0.053920244	Hist1h2af	ENSMUSG00000061991	319173	histone cluster 1, H2af
ENSMUSG00000063531.7	chr5	14025276	14256689	+	Sema3e	-8.55321015	6.27E-09	2.49E-07	603	479	464	0	2	2	3.371806741	3.210229454	3.199436811	-6.773372891	-4.505131099	-4.589935946	Sema3e	ENSMUSG00000063531	20349	sema domain, immunoglobulin domain (Ig), short basic domain, secreted, (semaphorin) 3E
ENSMUSG00000027635.15	chr2	156995265	157007154	-	Dsn1	-2.012874338	6.55E-09	2.59E-07	1176	1189	1060	338	282	290	4.334882386	4.520982005	4.39043093	2.629639132	2.315047863	2.270530313	Dsn1	ENSMUSG00000027635	66934	DSN1 homolog, MIS12 kinetochore complex component
ENSMUSG00000020593.14	chr12	16535669	16589770	-	Lpin1	-1.160064371	6.57E-09	2.60E-07	2834	2418	2424	1178	1153	1340	5.603475335	5.544739271	5.583373563	4.429363152	4.344743094	4.476691463	Lpin1	ENSMUSG00000020593	14245	lipin 1
ENSMUSG00000032487.8	chr1	150100031	150108227	+	Ptgs2	1.108422968	6.62E-09	2.61E-07	7338	5886	5953	13939	14120	16034	6.97586627	6.828036824	6.879424372	7.993518302	7.95844436	8.057027706	Ptgs2	ENSMUSG00000032487	19225	prostaglandin-endoperoxide synthase 2
ENSMUSG00000056758.14	chr10	120361275	120476469	-	Hmga2	1.250967281	6.65E-09	2.62E-07	2188	1871	2043	4902	4870	5777	5.230323449	5.174821782	5.336728552	6.485929024	6.422794976	6.584365599	Hmga2	ENSMUSG00000056758	15364	high mobility group AT-hook 2
ENSMUSG00000079553.10	chr17	33875666	33890661	-	Kifc1	-2.138235437	6.73E-09	2.64E-07	1538	1486	1417	385	397	306	4.721905509	4.842546197	4.809035044	2.817214159	2.807751856	2.347879223	Kifc1	ENSMUSG00000079553	100502766	kinesin family member C1
ENSMUSG00000032366.15	chr9	67022590	67049406	-	Tpm1	1.306860681	6.79E-09	2.66E-07	5605	5019	5176	13015	12832	16160	6.58722413	6.598170396	6.677663283	7.894570223	7.820455446	8.068320174	Tpm1	ENSMUSG00000032366	22003	tropomyosin 1, alpha
ENSMUSG00000016239.11	chrX	36328353	36362341	+	Lonrf3	-2.063759108	6.88E-09	2.68E-07	873	834	810	228	226	192	3.905260674	4.009610688	4.0025704	2.062677464	1.996308046	1.676850595	Lonrf3	ENSMUSG00000016239	74365	LON peptidase N-terminal domain and ring finger 3
ENSMUSG00000026923.15	chr2	26457903	26516663	-	Notch1	-1.864744093	6.93E-09	2.70E-07	1587	1360	1443	474	366	455	4.767137657	4.71476369	4.835257417	3.116891386	2.690610194	2.919443203	Notch1	ENSMUSG00000026923	18128	notch 1
ENSMUSG00000026655.14	chr2	3613758	3782142	+	Fam107b	-1.563956413	7.22E-09	2.80E-07	5198	4159	4216	1462	1500	1961	6.478476467	6.327036851	6.381732263	4.740848018	4.724168409	5.025877579	Fam107b	ENSMUSG00000026655	66540	family with sequence similarity 107, member B
ENSMUSG00000022346.14	chr15	61985341	61990374	+	Myc	3.200372712	7.26E-09	2.81E-07	45	37	41	404	365	454	-0.357608579	-0.466338861	-0.285058544	2.886623001	2.686668402	2.916272443	Myc	ENSMUSG00000022346	17869	myelocytomatosis oncogene
ENSMUSG00000078776.9	chr7	28129466	28164811	+	9530053A07Rik	-1.428718175	7.27E-09	2.81E-07	1129	1021	1011	394	440	421	4.276065336	4.301315938	4.322182629	2.850508599	2.955939015	2.80752478	9530053A07Rik	ENSMUSG00000078776	319482	RIKEN cDNA 9530053A07 gene
ENSMUSG00000026196.7	chr1	71027498	71103146	-	Bard1	-2.280627849	7.32E-09	2.81E-07	848	744	894	174	177	193	3.86336763	3.844970487	4.144839696	1.673710335	1.64461602	1.684325715	Bard1	ENSMUSG00000026196	12021	BRCA1 associated RING domain 1
ENSMUSG00000028551.14	chr4	109660876	109667189	-	Cdkn2c	-1.436421379	7.30E-09	2.81E-07	1131	1065	1041	390	421	468	4.27861765	4.362157327	4.364349148	2.835805847	2.892329627	2.960041197	Cdkn2c	ENSMUSG00000028551	12580	cyclin-dependent kinase inhibitor 2C (p18, inhibits CDK4)
ENSMUSG00000100210.1	chr13	23544465	23545312	+	Hist1h3f	-1.779053253	7.42E-09	2.84E-07	2861	2987	2558	925	892	805	5.617152672	5.849565447	5.660984542	4.080716288	3.974649165	3.741876738	Hist1h3f	ENSMUSG00000100210	260423	histone cluster 1, H3f
ENSMUSG00000015568.16	chr8	68880491	68907448	+	Lpl	1.186466294	7.47E-09	2.85E-07	3101	2808	2463	6548	7014	6748	5.73334719	5.760426536	5.606395781	6.903575874	6.949065361	6.808487111	Lpl	ENSMUSG00000015568	16956	lipoprotein lipase
ENSMUSG00000020423.6	chr1	134075170	134079120	-	Btg2	-1.131800874	7.48E-09	2.85E-07	6692	5681	5796	2980	2964	2905	6.842926299	6.776898606	6.840868355	5.767965767	5.706513887	5.592706698	Btg2	ENSMUSG00000020423	12227	B cell translocation gene 2, anti-proliferative
ENSMUSG00000036667.14	chr6	42668002	42710088	-	Tcaf1	4.917850334	7.45E-09	2.85E-07	38	26	36	998	934	1345	-0.598616679	-0.967237097	-0.470273417	4.190245726	4.040991659	4.482062635	Tcaf1	ENSMUSG00000036667	77574	TRPM8 channel-associated factor 1
ENSMUSG00000054932.6	chr5	90490737	90508907	+	Afp	2.292068008	7.58E-09	2.88E-07	143	110	152	667	711	728	1.299503707	1.092745008	1.592567457	3.609251135	3.647660752	3.596921121	Afp	ENSMUSG00000054932	11576	alpha fetoprotein
ENSMUSG00000105109.1	chr13	23534114	23534254	-	Gm44297	-3.154100609	7.66E-09	2.90E-07	430	464	391	44	55	54	2.884466208	3.164377235	2.952770522	-0.29763946	-0.032643328	-0.143679716	NA	NA	NA	NA
ENSMUSG00000059939.13	chr4	156109982	156127265	+	9430015G10Rik	-1.296880432	7.72E-09	2.92E-07	2089	1807	1731	829	751	867	5.163538824	5.124622381	5.097708696	3.92272528	3.7265701	3.848855907	9430015G10Rik	ENSMUSG00000059939	230996	RIKEN cDNA 9430015G10 gene
ENSMUSG00000037321.17	chr17	34187553	34197225	+	Tap1	-0.989711432	7.86E-09	2.96E-07	4739	4197	4105	2277	2243	2498	6.345115933	6.340157059	6.343244244	5.379862447	5.304476274	5.374982462	Tap1	ENSMUSG00000037321	21354	transporter 1, ATP-binding cassette, sub-family B (MDR/TAP)
ENSMUSG00000060002.14	chr10	88452745	88504073	-	Chpt1	1.690927805	7.88E-09	2.96E-07	237	245	215	761	798	846	2.026380484	2.244421663	2.091446083	3.799327335	3.814089403	3.813502217	Chpt1	ENSMUSG00000060002	212862	choline phosphotransferase 1
ENSMUSG00000071547.3	chr14	31134853	31139121	+	Nt5dc2	-1.178552185	7.98E-09	2.99E-07	1938	1682	1703	770	833	911	5.0553218	5.021233238	5.074188256	3.816278255	3.875979195	3.920234805	Nt5dc2	ENSMUSG00000071547	70021	5'-nucleotidase domain containing 2
ENSMUSG00000096010.2	chr6	136801553	136804415	-	Hist4h4	-2.073454155	8.05E-09	3.01E-07	8940	10334	8884	2361	2666	2146	7.260736582	7.640023419	7.456976896	5.432114929	5.553672418	5.155906417	Hist4h4	ENSMUSG00000096010	320332	histone cluster 4, H4
ENSMUSG00000023349.14	chr6	123229843	123247021	+	Clec4n	3.830443386	8.13E-09	3.03E-07	28	17	27	333	358	404	-1.032513205	-1.565874534	-0.878738262	2.60817006	2.658770114	2.748131852	Clec4n	ENSMUSG00000023349	56620	C-type lectin domain family 4, member n
ENSMUSG00000058099.15	chr15	82997721	83033306	-	Nfam1	1.173492621	8.18E-09	3.05E-07	3980	3483	3465	8394	8077	9954	6.093330728	6.071164297	6.098749827	7.26185579	7.152633936	7.369269097	Nfam1	ENSMUSG00000058099	74039	Nfat activating molecule with ITAM motif 1
ENSMUSG00000024646.13	chr18	84851338	84880401	+	Cyb5a	1.079446238	8.21E-09	3.05E-07	5251	4549	4160	9583	10544	11368	6.493110628	6.456334732	6.362443228	7.452964034	7.537143872	7.560890251	Cyb5a	ENSMUSG00000024646	109672	cytochrome b5 type A (microsomal)
ENSMUSG00000013698.12	chr1	172196728	172206804	-	Pea15a	-1.301835256	8.29E-09	3.07E-07	2208	1978	1827	795	935	877	5.243447898	5.255033799	5.175557715	3.862345229	4.042534649	3.865391274	Pea15a	ENSMUSG00000013698	18611	phosphoprotein enriched in astrocytes 15A
ENSMUSG00000015961.8	chr1	177762962	177796511	-	Adss	1.007121627	8.42E-09	3.09E-07	7506	6465	6422	13275	15017	15539	7.008521455	6.963388677	6.988821294	7.923105687	8.047297849	8.011788423	Adssl1	ENSMUSG00000011148	11565	adenylosuccinate synthetase like 1
ENSMUSG00000022372.14	chr15	66780819	66831829	-	Sla	-1.904662935	8.41E-09	3.09E-07	905	815	821	200	273	256	3.957167612	3.976383516	4.022018789	1.874085535	2.268337828	2.090950975	Sla	ENSMUSG00000022372	20491	src-like adaptor
ENSMUSG00000034135.14	chr9	46012820	46224194	+	Sik3	1.84415028	8.40E-09	3.09E-07	2867	2366	2500	9364	8416	12202	5.620174552	5.513381656	5.627902914	7.41961336	7.211945504	7.66302509	Sik3	ENSMUSG00000034135	70661	SIK family kinase 3
ENSMUSG00000035310.15	chr5	100441918	100500639	-	Lin54	-1.26994328	8.38E-09	3.09E-07	3261	2618	2606	1148	1205	1402	5.805916694	5.659367338	5.687800169	4.39216225	4.408356741	4.541921015	Lin54	ENSMUSG00000035310	231506	lin-54 homolog (C. elegans)
ENSMUSG00000031262.12	chrX	134308084	134362639	+	Cenpi	-1.94673056	8.62E-09	3.15E-07	1269	948	1089	270	296	348	4.44464146	4.194346412	4.429352505	2.306111892	2.3848291	2.533150805	Cenpi	ENSMUSG00000031262	102920	centromere protein I
ENSMUSG00000017607.9	chr11	99065678	99089306	-	Tns4	-4.032319133	8.68E-09	3.17E-07	345	310	302	23	14	26	2.567138681	2.583291907	2.580693356	-1.21878404	-1.969078199	-1.183943586	Tns4	ENSMUSG00000017607	217169	tensin 4
ENSMUSG00000049511.5	chr9	81628291	81633828	-	Htr1b	-9.329962148	9.16E-09	3.34E-07	1069	869	785	0	1	4	4.197317548	4.068884666	3.95736949	-6.773372891	-5.242096694	-3.741939039	Htr1b	ENSMUSG00000049511	15551	5-hydroxytryptamine (serotonin) receptor 1B
ENSMUSG00000021356.9	chr13	30749226	30766927	+	Irf4	-2.260505547	9.46E-09	3.39E-07	501	404	422	92	107	96	3.104702671	2.964838341	3.062709555	0.758008569	0.921133655	0.680592996	Irf4	ENSMUSG00000021356	16364	interferon regulatory factor 4
ENSMUSG00000022389.14	chr15	81802421	81826861	+	Tef	-1.108838654	9.37E-09	3.39E-07	2400	2182	2198	1111	1089	1160	5.363716001	5.396608387	5.442205841	4.344919342	4.262391287	4.268666767	Tef	ENSMUSG00000022389	21685	thyrotroph embryonic factor
ENSMUSG00000022747.16	chr16	58468125	58524243	-	St3gal6	-1.358421558	9.46E-09	3.39E-07	4383	3510	3617	1408	1549	1847	6.232464313	6.082303262	6.160679326	4.686570957	4.770527845	4.939494608	St3gal6	ENSMUSG00000022747	54613	ST3 beta-galactoside alpha-2,3-sialyltransferase 6
ENSMUSG00000026429.8	chr1	134962565	134974162	+	Ube2t	-1.951924675	9.46E-09	3.39E-07	827	753	742	176	244	225	3.827212282	3.86230615	3.87614924	1.690151482	2.106631461	1.905119582	Ube2t	ENSMUSG00000026429	67196	ubiquitin-conjugating enzyme E2T
ENSMUSG00000038252.13	chr6	125168007	125191701	-	Ncapd2	-0.938393163	9.38E-09	3.39E-07	19737	17122	16311	9486	9578	10550	8.403248426	8.368448189	8.333503862	7.438287303	7.398524837	7.45315971	Ncapd2	ENSMUSG00000038252	68298	non-SMC condensin I complex, subunit D2
ENSMUSG00000058729.13	chr1	180641150	180690694	+	Lin9	-1.267477537	9.49E-09	3.39E-07	1725	1440	1382	622	661	732	4.887395539	4.797196394	4.772965789	3.508557136	3.542538152	3.604820908	Lin9	ENSMUSG00000058729	72568	lin-9 homolog (C. elegans)
ENSMUSG00000097589.9	chr14	61602839	61682373	-	Dleu2	-1.251327063	9.34E-09	3.39E-07	2330	1941	2133	943	922	1006	5.321020578	5.227798441	5.398908419	4.108505816	4.022345907	4.063267416	Dleu2	ENSMUSG00000097589	668253	deleted in lymphocytic leukemia, 2
ENSMUSG00000105072.1	chr9	44334965	44335105	-	Gm44335	-1.584708802	9.48E-09	3.39E-07	2814	3118	2642	963	980	1109	5.593259714	5.911478992	5.707589781	4.138767965	4.110314626	4.203829911	NA	NA	NA	NA
ENSMUSG00000024399.5	chr17	35194439	35196320	+	Ltb	-1.808677846	9.65E-09	3.44E-07	1400	1370	1335	424	457	377	4.586323049	4.725329062	4.723066285	2.956247852	3.010568739	2.648468793	Ltb	ENSMUSG00000024399	16994	lymphotoxin B
ENSMUSG00000079429.9	chr1	88226986	88262289	+	Mroh2a	-2.148678127	9.70E-09	3.45E-07	546	451	497	125	114	120	3.228674466	3.123424626	3.29845474	1.198170663	1.012144594	1.001025295	Mroh2a	ENSMUSG00000079429	100040766	maestro heat-like repeat family member 2A
ENSMUSG00000054717.7	chr8	57511907	57515999	+	Hmgb2	-2.449565024	9.74E-09	3.46E-07	3779	3882	3534	758	885	585	6.018576455	6.227612658	6.127192451	3.793632479	3.963289302	3.28166132	Hmgb2	ENSMUSG00000054717	97165	high mobility group box 2
ENSMUSG00000011179.7	chr12	17544873	17551502	+	Odc1	1.400823603	9.81E-09	3.47E-07	15848	15124	13759	39103	47046	40391	8.086655461	8.189442278	8.088042449	9.481637231	9.694740584	9.389900062	Odc1	ENSMUSG00000011179	18263	ornithine decarboxylase, structural 1
ENSMUSG00000029512.11	chr5	110784488	110810097	-	Ulk1	-1.251029101	9.82E-09	3.47E-07	5526	4860	4821	2342	2035	2466	6.566747159	6.551731465	6.575168357	5.420460441	5.164108312	5.356385531	Ulk1	ENSMUSG00000029512	22241	unc-51 like kinase 1
ENSMUSG00000003134.10	chr1	39371492	39478755	-	Tbc1d8	-1.239582479	1.01E-08	3.55E-07	1445	1207	1245	562	582	617	4.631949674	4.542649923	4.622411331	3.362336395	3.359055045	3.358431286	Tbc1d8	ENSMUSG00000003134	54610	TBC1 domain family, member 8
ENSMUSG00000029385.14	chr5	93267257	93276231	+	Ccng2	-1.353365927	1.01E-08	3.55E-07	1128	1070	1052	443	441	475	4.274787484	4.368911529	4.379506542	3.019417403	2.959210433	2.98143749	Ccng2	ENSMUSG00000029385	12452	cyclin G2
ENSMUSG00000041859.10	chr1	20802968	20820312	-	Mcm3	-0.935927954	1.01E-08	3.55E-07	12180	11048	10578	5814	6401	6685	7.706882516	7.736405344	7.708749476	6.73206653	6.817135087	6.794955705	Mcm3	ENSMUSG00000041859	17215	minichromosome maintenance complex component 3
ENSMUSG00000019961.16	chr10	91147571	91171582	-	Tmpo	-1.109506749	1.02E-08	3.57E-07	8046	7166	7138	3411	3968	3705	7.108742453	7.111895436	7.141307264	5.96281761	6.127318896	5.943588469	Tmpo	ENSMUSG00000019961	21917	thymopoietin
ENSMUSG00000062661.6	chr2	31245823	31295989	+	Ncs1	1.403352564	1.02E-08	3.57E-07	562	463	466	1434	1351	1428	3.270306067	3.161267978	3.205635295	4.712959361	4.573286602	4.56842128	Ncs1	ENSMUSG00000062661	14299	neuronal calcium sensor 1
ENSMUSG00000029687.16	chr6	47530139	47595341	-	Ezh2	-1.248644	1.03E-08	3.58E-07	1759	1536	1469	660	682	802	4.915546579	4.8902745	4.861011668	3.59404186	3.587626041	3.736493541	Ezh2	ENSMUSG00000029687	14056	enhancer of zeste 2 polycomb repressive complex 2 subunit
ENSMUSG00000027242.14	chr2	121506723	121544860	+	Wdr76	-1.502755104	1.05E-08	3.65E-07	2056	2056	1835	654	729	868	5.140572137	5.310817805	5.181859423	3.580876491	3.683704974	3.850517998	Wdr76	ENSMUSG00000027242	241627	WD repeat domain 76
ENSMUSG00000066026.14	chr4	144892827	144928209	+	Dhrs3	-1.347050678	1.05E-08	3.66E-07	1766	1589	1584	695	721	661	4.921274815	4.93919975	4.969713969	3.668533813	3.66779639	3.457733305	Dhrs3	ENSMUSG00000066026	20148	dehydrogenase/reductase (SDR family) member 3
ENSMUSG00000021697.12	chr13	108316332	108407782	+	Depdc1b	-4.166234097	1.07E-08	3.70E-07	300	238	233	16	17	12	2.365817961	2.202687905	2.207180764	-1.728978772	-1.697776177	-2.268007851	Depdc1b	ENSMUSG00000021697	218581	DEP domain containing 1B
ENSMUSG00000044966.4	chr11	16951375	16954772	+	Fbxo48	-3.28939201	1.08E-08	3.71E-07	311	284	246	26	35	30	2.417685134	2.457127291	2.285345861	-1.045452437	-0.677312075	-0.981126703	Fbxo48	ENSMUSG00000044966	319701	F-box protein 48
ENSMUSG00000029730.16	chr5	138164583	138172422	-	Mcm7	-1.184928081	1.09E-08	3.76E-07	8270	7826	7047	3439	3885	3557	7.148355617	7.238994014	7.122797882	5.974610249	6.096825352	5.884784001	Mcm7	ENSMUSG00000029730	17220	minichromosome maintenance complex component 7
ENSMUSG00000041845.10	chr19	4425459	4439432	-	Rhod	-1.786937432	1.09E-08	3.76E-07	598	576	542	161	174	196	3.359804218	3.476019247	3.423381352	1.562017463	1.620024032	1.706521461	Rhod	ENSMUSG00000041845	11854	ras homolog family member D
ENSMUSG00000035356.16	chr16	55811375	55838899	-	Nfkbiz	1.116525807	1.11E-08	3.81E-07	4811	3949	4111	9217	9452	11192	6.366867794	6.252296756	6.345351138	7.396786905	7.379421035	7.538380657	Nfkbiz	ENSMUSG00000035356	80859	nuclear factor of kappa light polypeptide gene enhancer in B cells inhibitor, zeta
ENSMUSG00000021707.4	chr13	92354783	92389053	+	Dhfr	-1.462517277	1.15E-08	3.93E-07	2382	2125	1989	728	802	1002	5.352857279	5.358428993	5.298092208	3.735412271	3.821298388	4.057522481	Dhfr	ENSMUSG00000021707	13361	dihydrofolate reductase
ENSMUSG00000029602.11	chr5	120648812	120679597	+	Rasal1	-1.938220618	1.16E-08	3.97E-07	600	614	548	159	168	163	3.364617216	3.568111649	3.439249835	1.544039722	1.569545587	1.441282785	Rasal1	ENSMUSG00000029602	19415	RAS protein activator like 1 (GAP1 like)
ENSMUSG00000025234.11	chr9	59388258	59486618	-	Arih1	0.985809389	1.18E-08	4.01E-07	3686	3436	3399	6838	7601	7870	5.982632822	6.051566693	6.071008879	6.966091303	7.065009223	7.030375535	Arih1	ENSMUSG00000025234	23806	ariadne RBR E3 ubiquitin protein ligase 1
ENSMUSG00000028884.14	chr4	132768332	132778752	+	Rpa2	-1.690965075	1.18E-08	4.02E-07	2461	2382	2163	790	851	689	5.399918805	5.523102948	5.41905343	3.853248761	3.906803525	3.517542701	Rpa2	ENSMUSG00000028884	19891	replication protein A2
ENSMUSG00000048458.8	chr3	105704599	105720842	+	Fam212b	-1.210219455	1.19E-08	4.02E-07	3306	2683	2854	1330	1259	1493	5.825685967	5.694742622	5.818924371	4.604379904	4.471576212	4.632617481	Fam212b	ENSMUSG00000048458	109050	family with sequence similarity 212, member B
ENSMUSG00000038068.14	chr13	47122720	47247991	+	Rnf144b	-5.968268989	1.19E-08	4.03E-07	237	219	219	2	6	3	2.026380484	2.082919578	2.117979154	-4.451444797	-3.126619476	-4.104509119	Rnf144b	ENSMUSG00000038068	218215	ring finger protein 144B
ENSMUSG00000045273.8	chr13	100759674	100775899	-	Cenph	-1.818811966	1.20E-08	4.06E-07	781	668	677	178	230	238	3.744698844	3.689626199	3.743979161	1.706407373	2.021563746	1.985981415	Cenph	ENSMUSG00000045273	26886	centromere protein H
ENSMUSG00000027931.12	chr3	90450591	90465866	-	Npr1	-3.040047388	1.21E-08	4.07E-07	350	317	344	48	36	47	2.587867415	2.615455231	2.768262197	-0.173460049	-0.637234635	-0.342008433	Npr1	ENSMUSG00000027931	18160	natriuretic peptide receptor 1
ENSMUSG00000001131.11	chrX	20870166	20874735	+	Timp1	5.956181539	1.22E-08	4.08E-07	2	4	2	199	214	193	-4.543475124	-3.52523255	-4.338169881	1.866872045	1.917774643	1.684325715	Timp1	ENSMUSG00000001131	21857	tissue inhibitor of metalloproteinase 1
ENSMUSG00000023186.14	chr9	38718268	38743337	+	Vwa5a	0.950921475	1.22E-08	4.08E-07	4149	3674	3531	7228	7683	8573	6.153318573	6.148174685	6.125967405	7.046107695	7.08048873	7.153804527	Vwa5a	ENSMUSG00000023186	67776	von Willebrand factor A domain containing 5A
ENSMUSG00000034311.3	chrX	100625737	100727214	+	Kif4	-1.903847057	1.23E-08	4.12E-07	2222	2012	1913	575	473	729	5.252564484	5.279615517	5.24190021	3.395299227	3.060161421	3.598900127	Kif4	ENSMUSG00000034311	16571	kinesin family member 4
ENSMUSG00000035208.15	chr11	83002158	83020810	-	Slfn8	-1.34504975	1.23E-08	4.12E-07	1431	1213	1177	489	512	607	4.617908736	4.549800842	4.541413369	3.161792158	3.174349	3.334876558	Slfn8	ENSMUSG00000035208	276950	schlafen 8
ENSMUSG00000028044.6	chr3	89415472	89418383	-	Cks1b	-1.228180731	1.24E-08	4.14E-07	2916	2681	2461	1257	1232	1186	5.64461914	5.693666987	5.605224049	4.522969793	4.440312737	4.300632344	Cks1b	ENSMUSG00000028044	54124	CDC28 protein kinase 1b
ENSMUSG00000029363.14	chr5	117378103	117389047	-	Rfc5	-1.003173137	1.25E-08	4.17E-07	5146	4702	4506	2568	2423	2664	6.463972692	6.504054677	6.4776937	5.553337467	5.415817173	5.467785077	Rfc5	ENSMUSG00000029363	72151	replication factor C (activator 1) 5
ENSMUSG00000079419.4	chr19	11469366	11482192	+	Ms4a6c	-2.973831851	1.26E-08	4.20E-07	684	609	611	81	63	122	3.553503512	3.556324859	3.596110713	0.575355263	0.161625492	1.024773898	Ms4a6c	ENSMUSG00000079419	73656	membrane-spanning 4-domains, subfamily A, member 6C
ENSMUSG00000040274.11	chr5	3341485	3531008	+	Cdk6	1.486534865	1.27E-08	4.20E-07	4781	3760	4204	12063	11320	14914	6.357844341	6.18155123	6.377620554	7.784988027	7.639590865	7.952563952	Cdk6	ENSMUSG00000040274	12571	cyclin-dependent kinase 6
ENSMUSG00000025154.14	chr19	41766588	41802084	-	Arhgap19	-3.875354299	1.28E-08	4.21E-07	294	246	210	18	17	18	2.336720605	2.250286285	2.057578447	-1.563919526	-1.697776177	-1.702410675	Arhgap19	ENSMUSG00000025154	71085	Rho GTPase activating protein 19
ENSMUSG00000036528.15	chr7	107595207	107748583	+	Ppfibp2	-8.397348361	1.28E-08	4.21E-07	430	443	434	1	0	3	2.884466208	3.097632743	3.103114391	-5.188410391	-6.827059194	-4.104509119	Ppfibp2	ENSMUSG00000036528	19024	PTPRF interacting protein, binding protein 2 (liprin beta 2)
ENSMUSG00000022885.15	chr16	23224740	23360350	+	St6gal1	-7.41971072	1.28E-08	4.22E-07	229	180	184	0	2	1	1.976947124	1.800697476	1.86737903	-6.773372891	-4.505131099	-5.32690154	St6gal1	ENSMUSG00000022885	20440	beta galactoside alpha 2,6 sialyltransferase 1
ENSMUSG00000039994.15	chr10	128232065	128252941	+	Timeless	-1.640355669	1.30E-08	4.28E-07	2209	2108	1888	635	825	678	5.244100996	5.346843755	5.222927093	3.538375424	3.862065211	3.494340965	Timeless	ENSMUSG00000039994	21853	timeless circadian clock 1
ENSMUSG00000056394.17	chr7	13277283	13311433	+	Lig1	-1.188598622	1.34E-08	4.38E-07	2754	2652	2448	1200	1133	1356	5.562171528	5.677979485	5.597584505	4.456046797	4.319509481	4.493809291	Lig1	ENSMUSG00000056394	16881	ligase I, DNA, ATP-dependent
ENSMUSG00000033777.3	chrX	106143204	106160493	+	Tlr13	-1.985818774	1.34E-08	4.40E-07	1015	843	927	199	266	291	4.122571305	4.025086707	4.197105496	1.866872045	2.230932528	2.275488032	Tlr13	ENSMUSG00000033777	279572	toll-like receptor 13
ENSMUSG00000042286.13	chr14	31139013	31168641	-	Stab1	-1.36883837	1.36E-08	4.43E-07	2199	1925	2068	883	862	819	5.237556667	5.215859857	5.354271267	4.013713433	3.925321452	3.766736098	Stab1	ENSMUSG00000042286	192187	stabilin 1
ENSMUSG00000005125.12	chr15	66929321	66969640	-	Ndrg1	-1.714963391	1.38E-08	4.47E-07	945	852	860	316	256	296	4.019530429	4.040398473	4.088933406	2.532688798	2.175755821	2.300024254	Ndrg1	ENSMUSG00000005125	17988	N-myc downstream regulated gene 1
ENSMUSG00000058135.12	chr3	108012255	108017973	-	Gstm1	2.420922972	1.37E-08	4.47E-07	97	83	87	486	462	592	0.741927094	0.688546741	0.791113136	3.152923103	3.026250361	3.298807303	Gstm1	ENSMUSG00000058135	14862	glutathione S-transferase, mu 1
ENSMUSG00000017390.15	chr11	78322968	78327781	+	Aldoc	0.994646594	1.38E-08	4.48E-07	2054	1884	1779	3851	4195	4128	5.139168396	5.184808529	5.137158242	6.137831819	6.207567845	6.099537949	Aldoc	ENSMUSG00000017390	11676	aldolase C, fructose-bisphosphate
ENSMUSG00000034652.12	chr11	114890041	114904654	+	Cd300a	1.028961815	1.38E-08	4.48E-07	2533	2333	2431	4927	5395	5612	5.441512894	5.493122201	5.587532901	6.493267265	6.570481751	6.542563784	Cd300a	ENSMUSG00000034652	217303	CD300A molecule
ENSMUSG00000041836.10	chr7	135537481	135686293	+	Ptpre	1.409124998	1.39E-08	4.48E-07	1969	1851	1839	4998	4841	6339	5.078210482	5.159321283	5.184999985	6.513906615	6.414179185	6.718289302	Ptpre	ENSMUSG00000041836	19267	protein tyrosine phosphatase, receptor type, E
ENSMUSG00000026204.15	chr1	75247027	75264502	-	Ptprn	3.760337617	1.41E-08	4.55E-07	35	25	41	497	426	535	-0.7156561	-1.022732209	-0.285058544	3.185179824	2.909342737	3.152878724	Ptprn	ENSMUSG00000026204	19275	protein tyrosine phosphatase, receptor type, N
ENSMUSG00000039997.16	chr1	173920407	173942672	-	Ifi203	-1.592009984	1.42E-08	4.57E-07	1690	1336	1331	443	500	603	4.857831082	4.689086571	4.718738737	3.019417403	3.140167065	3.32534592	Ifi203	ENSMUSG00000039997	15950	interferon activated gene 203
ENSMUSG00000003131.6	chr9	45965311	45984871	-	Pafah1b2	0.921567216	1.43E-08	4.58E-07	7320	6775	6379	12736	13912	14854	6.972323255	7.030954148	6.979129665	7.863308366	7.937034873	7.946748384	Pafah1b2	ENSMUSG00000003131	18475	platelet-activating factor acetylhydrolase, isoform 1b, subunit 2
ENSMUSG00000031373.4	chrX	163976822	164027997	-	Car5b	1.424531562	1.43E-08	4.58E-07	2237	2005	2142	5632	5568	7241	5.262268748	5.2745887	5.404981513	6.686186802	6.616013848	6.910208811	Car5b	ENSMUSG00000031373	56078	carbonic anhydrase 5b, mitochondrial
ENSMUSG00000042265.13	chr17	48232768	48246924	+	Trem1	-3.338568805	1.43E-08	4.58E-07	424	352	351	30	54	37	2.864217524	2.766321896	2.797282903	-0.842635554	-0.05887487	-0.68304535	Trem1	ENSMUSG00000042265	58217	triggering receptor expressed on myeloid cells 1
ENSMUSG00000027641.13	chr2	157145893	157204534	-	Rbl1	-1.010817894	1.47E-08	4.70E-07	5488	4543	4687	2415	2700	2681	6.556792982	6.454430812	6.534504999	5.464733246	5.571951639	5.476960497	Rbl1	ENSMUSG00000027641	19650	retinoblastoma-like 1 (p107)
ENSMUSG00000033450.7	chr17	7926000	7934897	+	Tagap	-1.650023676	1.52E-08	4.83E-07	907	776	704	266	284	261	3.960350614	3.905684563	3.800357921	2.284618831	2.325225648	2.118803095	Tagap	ENSMUSG00000033450	72536	T cell activation Rho GTPase activating protein
ENSMUSG00000032595.10	chr9	107992497	107999684	+	Cdhr4	4.186231593	1.53E-08	4.86E-07	11	13	16	259	275	259	-2.341841263	-1.940270049	-1.615703856	2.246217837	2.278849314	2.107726688	Cdhr4	ENSMUSG00000032595	69398	cadherin-related family member 4
ENSMUSG00000026873.9	chr2	34893757	34914026	-	Phf19	-1.747931157	1.56E-08	4.94E-07	893	902	781	241	299	280	3.9379207	4.122625571	3.950004087	2.142506487	2.399352998	2.21999292	Phf19	ENSMUSG00000026873	74016	PHD finger protein 19
ENSMUSG00000032324.10	chr9	56135885	56161070	-	Tspan3	1.320427652	1.58E-08	4.97E-07	3081	2633	2530	6883	6601	8623	5.724013856	5.667608193	5.645108783	6.975553701	6.861518963	7.162193775	Tspan3	ENSMUSG00000032324	56434	tetraspanin 3
ENSMUSG00000037966.15	chr13	49187485	49196244	+	Ninj1	1.557789206	1.57E-08	4.97E-07	1061	1067	924	3156	3468	2987	4.186485437	4.364862803	4.192431534	5.850737144	5.933036975	5.632858957	Ninj1	ENSMUSG00000037966	18081	ninjurin 1
ENSMUSG00000018008.7	chr15	78597047	78622019	+	Cyth4	1.052670991	1.59E-08	5.01E-07	10374	9688	9322	20866	22974	21354	7.475350968	7.546900054	7.526403201	8.575528121	8.660686649	8.470388457	Cyth4	ENSMUSG00000018008	72318	cytohesin 4
ENSMUSG00000028494.12	chr4	86648386	86670060	-	Plin2	-0.957497643	1.60E-08	5.02E-07	5119	4430	4196	2365	2593	2594	6.456383981	6.418096256	6.37487289	5.434556554	5.51362546	5.42937678	Plin2	ENSMUSG00000028494	11520	perilipin 2
ENSMUSG00000044165.12	chr3	103832601	103854618	+	Bcl2l15	4.037759065	1.61E-08	5.05E-07	69	37	55	809	844	1157	0.253537853	-0.466338861	0.134317891	3.887514379	3.894894418	4.264932437	Bcl2l15	ENSMUSG00000044165	229672	BCLl2-like 15
ENSMUSG00000020898.18	chr11	69015911	69036473	+	Ctc1	-0.883055716	1.64E-08	5.11E-07	5814	4989	4889	2867	3009	3207	6.640036202	6.589521983	6.595373252	5.712204879	5.728248907	5.735369509	Ctc1	ENSMUSG00000020898	68964	CTS telomere maintenance complex component 1
ENSMUSG00000042688.16	chr9	75369062	75410005	-	Mapk6	1.06960734	1.63E-08	5.11E-07	5067	4263	4600	9658	9991	11655	6.441655249	6.36266499	6.507476976	7.464210544	7.459426373	7.596859234	Mapk6	ENSMUSG00000042688	50772	mitogen-activated protein kinase 6
ENSMUSG00000024679.10	chr19	11586604	11604849	-	Ms4a6d	-1.659844892	1.65E-08	5.14E-07	1207	962	1033	322	406	356	4.372404254	4.215485179	4.353224698	2.559782459	2.840052348	2.565894226	Ms4a6d	ENSMUSG00000024679	68774	membrane-spanning 4-domains, subfamily A, member 6D
ENSMUSG00000038668.14	chr4	58435255	58553898	-	Lpar1	6.267255044	1.72E-08	5.34E-07	6	5	2	363	398	348	-3.164963501	-3.235725932	-4.338169881	2.732438663	2.81137672	2.533150805	Lpar1	ENSMUSG00000038668	14745	lysophosphatidic acid receptor 1
ENSMUSG00000025804.4	chr9	123962126	123968692	-	Ccr1	3.120529873	1.72E-08	5.34E-07	85	59	43	496	578	635	0.552449296	0.199660212	-0.21715448	3.182277016	3.349113955	3.399884274	Ccr1	ENSMUSG00000025804	12768	chemokine (C-C motif) receptor 1
ENSMUSG00000032290.6	chr9	56994968	57062805	+	Ptpn9	0.912832962	1.73E-08	5.34E-07	2913	2676	2622	5420	5336	5771	5.643134376	5.690974386	5.696629082	6.630837329	6.554618936	6.582866565	Ptpn9	ENSMUSG00000032290	56294	protein tyrosine phosphatase, non-receptor type 9
ENSMUSG00000027010.16	chr2	71271063	71367749	-	Slc25a12	0.849361483	1.73E-08	5.35E-07	4889	4248	4204	8123	8517	9037	6.390068008	6.357580298	6.377620554	7.214512838	7.229155133	7.229843986	Slc25a12	ENSMUSG00000027010	78830	solute carrier family 25 (mitochondrial carrier, Aralar), member 12
ENSMUSG00000026208.9	chr1	75360329	75368579	+	Des	-2.043663843	1.75E-08	5.39E-07	1044	831	969	263	206	270	4.163193558	4.004414902	4.260999112	2.26828626	1.862938777	2.167620743	Des	ENSMUSG00000026208	13346	desmin
ENSMUSG00000021338.17	chr13	24012344	24280795	-	Lrrc16a	1.686632228	1.77E-08	5.43E-07	249	241	220	849	780	818	2.097492786	2.220721828	2.12453687	3.957097246	3.781195628	3.764974566	Carmil1	ENSMUSG00000021338	68732	capping protein regulator and myosin 1 linker 1
ENSMUSG00000106440.1	chr13	21833093	21833230	+	Gm44466	-3.027633994	1.76E-08	5.43E-07	1105	1168	913	118	110	199	4.245080091	4.495284468	4.175162943	1.115370357	0.960843365	1.728380895	NA	NA	NA	NA
ENSMUSG00000002111.8	chr2	91082390	91115756	+	Spi1	0.988771448	1.77E-08	5.43E-07	10580	10297	9695	21594	20760	22540	7.503716966	7.634848955	7.583001609	8.625003401	8.514494375	8.548367857	Spi1	ENSMUSG00000002111	20375	spleen focus forming virus (SFFV) proviral integration oncogene
ENSMUSG00000026435.15	chr1	131962967	131982969	+	Slc45a3	3.567299208	1.79E-08	5.46E-07	28	51	38	473	481	489	-1.032513205	-0.008657024	-0.393311435	3.113847724	3.084332794	3.023301009	Slc45a3	ENSMUSG00000026435	212980	solute carrier family 45, member 3
ENSMUSG00000042524.13	chr15	79724070	79742536	-	Sun2	-1.447027991	1.79E-08	5.46E-07	2453	2491	2415	969	1012	909	5.395222337	5.587641308	5.578008162	4.147724197	4.156646998	3.917065787	Sun2	ENSMUSG00000042524	223697	Sad1 and UNC84 domain containing 2
ENSMUSG00000062995.12	chr6	8630527	8778488	-	Ica1	1.424022821	1.79E-08	5.46E-07	543	519	491	1340	1424	1708	3.220733006	3.325822388	3.280949631	4.615182613	4.649180712	4.826650492	Ica1	ENSMUSG00000062995	15893	islet cell autoantigen 1
ENSMUSG00000040111.15	chr9	40293233	40531383	-	Gramd1b	1.251373054	1.81E-08	5.50E-07	2405	2225	2201	5222	5466	6806	5.366717865	5.424756234	5.444173153	6.577151981	6.589342514	6.820833378	Gramd1b	ENSMUSG00000040111	235283	GRAM domain containing 1B
ENSMUSG00000032294.16	chr9	59656368	59679375	+	Pkm	0.971584109	1.83E-08	5.57E-07	221160	212721	197581	425579	432501	466263	11.88933099	12.00344878	11.93199037	12.92569624	12.89528642	12.91892193	Pkm	ENSMUSG00000032294	18746	pyruvate kinase, muscle
ENSMUSG00000038235.4	chr1	171437535	171464603	+	F11r	1.503455761	1.84E-08	5.57E-07	354	287	281	882	877	1037	2.604238598	2.472260595	2.476893136	4.012079577	3.950196121	4.10703158	F11r	ENSMUSG00000038235	16456	F11 receptor
ENSMUSG00000036737.12	chr9	119238432	119322427	-	Oxsr1	0.91661847	1.85E-08	5.61E-07	3569	3429	3185	6632	6788	7126	5.936103067	6.048624989	5.977206146	6.921964164	6.901817919	6.887113951	Oxsr1	ENSMUSG00000036737	108737	oxidative-stress responsive 1
ENSMUSG00000106734.3	chr6	3333194	3346128	-	Gm20559	-2.071157568	1.86E-08	5.61E-07	660	600	588	165	173	135	3.502011532	3.534862885	3.540800629	1.597314515	1.611732658	1.170285001	Gm20559	NA	330256	predicted gene, 20559
ENSMUSG00000055184.4	chr1	131527903	131539872	+	Fam72a	-1.989841473	1.87E-08	5.64E-07	767	802	696	168	209	234	3.718619721	3.953200031	3.783881567	1.62323189	1.883747239	1.961580072	Fam72a	ENSMUSG00000055184	108900	family with sequence similarity 72, member A
ENSMUSG00000030142.10	chr6	123281789	123289870	-	Clec4e	1.144314834	1.88E-08	5.65E-07	8005	6786	6538	14766	16529	19242	7.101372577	7.033294459	7.014646013	8.076667403	8.18569627	8.320144586	Clec4e	ENSMUSG00000030142	56619	C-type lectin domain family 4, member e
ENSMUSG00000074151.13	chr8	94434356	94527272	+	Nlrc5	-1.015841639	1.88E-08	5.65E-07	2394	2092	2096	1112	1191	1174	5.360105501	5.335854356	5.373669139	4.346216729	4.391504042	4.285966957	Nlrc5	ENSMUSG00000074151	434341	NLR family, CARD domain containing 5
ENSMUSG00000036223.15	chr18	74195299	74207818	-	Ska1	-3.867888021	1.89E-08	5.65E-07	664	605	527	56	53	28	3.51072217	3.546825599	3.382929308	0.046806071	-0.085592208	-1.078974027	Ska1	ENSMUSG00000036223	66468	spindle and kinetochore associated complex subunit 1
ENSMUSG00000074570.13	chr2	172393794	172433757	+	Cass4	1.35759337	1.90E-08	5.65E-07	979	873	856	2281	2734	2420	4.070498463	4.075506342	4.08221146	5.382394047	5.590002152	5.329225338	Cass4	ENSMUSG00000074570	320664	Cas scaffolding protein family member 4
ENSMUSG00000094777.2	chr13	21833026	21833507	-	Hist1h2ap	-3.081549833	1.90E-08	5.65E-07	1110	1248	979	119	112	199	4.251590458	4.590822555	4.275803707	1.127493917	0.986721997	1.728380895	Hist1h2ap	ENSMUSG00000094777	319171	histone cluster 1, H2ap
ENSMUSG00000097415.2	chr7	75769038	75782099	-	AU020206	-1.099999189	1.89E-08	5.65E-07	1833	1629	1510	811	827	837	4.974981331	4.975056086	4.900712493	3.891074393	3.865556307	3.798081339	AU020206	NA	100504230	expressed sequence AU020206
ENSMUSG00000022945.11	chr16	93883901	93906115	+	Chaf1b	-1.444434535	1.93E-08	5.73E-07	1635	1568	1426	624	633	564	4.810112825	4.920012263	4.818166056	3.51318487	3.480141615	3.22896573	Chaf1b	ENSMUSG00000022945	110749	chromatin assembly factor 1, subunit B (p60)
ENSMUSG00000035547.14	chr7	98121559	98178274	-	Capn5	1.577505282	1.94E-08	5.75E-07	566	526	509	1744	1492	1894	3.280528927	3.34513217	3.33284036	4.995224991	4.716456022	4.975737384	Capn5	ENSMUSG00000035547	12337	calpain 5
ENSMUSG00000063193.8	chr11	114922781	114934386	-	Cd300lb	1.23125704	1.96E-08	5.79E-07	6659	6017	6365	14806	14693	18568	6.835794928	6.85979097	6.975960149	8.080570141	8.015831273	8.268705615	Cd300lb	ENSMUSG00000063193	217304	CD300 molecule like family member B
ENSMUSG00000039145.16	chr2	5293457	5714515	-	Camk1d	1.172237026	1.98E-08	5.85E-07	835	789	713	1758	1794	2085	3.841092799	3.929637905	3.818671644	5.006756728	4.982307013	5.114313556	Camk1d	ENSMUSG00000039145	227541	calcium/calmodulin-dependent protein kinase ID
ENSMUSG00000041515.9	chr8	120736358	120756694	+	Irf8	-1.08972586	2.00E-08	5.89E-07	2167	2005	1938	966	1077	1027	5.216413059	5.2745887	5.260627044	4.143253031	4.24641296	4.093058638	Irf8	ENSMUSG00000041515	15900	interferon regulatory factor 8
ENSMUSG00000025220.7	chr19	45750261	45783520	-	Mgea5	-0.875424593	2.01E-08	5.90E-07	7248	6293	6210	3647	3921	3927	6.958063541	6.924489299	6.940395732	6.059319371	6.110130691	6.027531519	Mgea5	ENSMUSG00000025220	76055	meningioma expressed antigen 5 (hyaluronidase)
ENSMUSG00000039187.16	chr7	79391929	79450264	+	Fanci	-1.68112332	2.01E-08	5.90E-07	1491	1353	1231	426	526	413	4.677145043	4.707321621	4.606102937	2.96302904	3.213230527	2.779879478	Fanci	ENSMUSG00000039187	208836	Fanconi anemia, complementation group I
ENSMUSG00000030653.17	chr7	101410886	101512819	+	Pde2a	1.10286978	2.03E-08	5.94E-07	3424	3233	2939	6945	7863	7226	5.876274426	5.963723344	5.861257087	6.988489949	7.113896681	6.907217322	Pde2a	ENSMUSG00000030653	207728	phosphodiesterase 2A, cGMP-stimulated
ENSMUSG00000001128.7	chrX	20925454	20931555	-	Cfp	-0.978343747	2.08E-08	6.08E-07	11885	11512	10510	5943	6290	6157	7.671511756	7.795755985	7.699445706	6.763724147	6.791899785	6.676264967	Cfp	ENSMUSG00000001128	18636	complement factor properdin
ENSMUSG00000036752.4	chr2	25222160	25224702	-	Tubb4b	-0.869910722	2.08E-08	6.09E-07	11656	10920	10022	6061	6328	6669	7.643443828	7.719593741	7.630856821	6.792086245	6.800588679	6.791498853	Tubb4b	ENSMUSG00000036752	227613	tubulin, beta 4B class IVB
ENSMUSG00000027398.13	chr2	129364570	129371139	-	Il1b	1.372499336	2.10E-08	6.11E-07	1111	904	928	2364	2970	2828	4.252889014	4.125819142	4.198660124	5.433946535	5.709430879	5.553957415	Il1b	ENSMUSG00000027398	16176	interleukin 1 beta
ENSMUSG00000032579.14	chr9	107327084	107338350	-	Hemk1	-5.405432671	2.11E-08	6.13E-07	219	184	178	4	7	3	1.91267391	1.832319455	1.819682288	-3.60344789	-2.920168599	-4.104509119	Hemk1	ENSMUSG00000032579	69536	HemK methyltransferase family member 1
ENSMUSG00000102234.1	chr1	182484179	182492473	+	Gm37885	1.216620214	2.12E-08	6.16E-07	615	557	562	1397	1346	1571	3.400211827	3.427670444	3.47561131	4.675259676	4.56793932	4.706062516	NA	NA	NA	NA
ENSMUSG00000062127.11	chr3	105001915	105053146	-	Cttnbp2nl	1.176672703	2.15E-08	6.24E-07	7231	6058	6153	14603	14321	18229	6.954675996	6.86958738	6.927093532	8.060653667	7.97883579	8.24212333	Cttnbp2nl	ENSMUSG00000062127	80281	CTTNBP2 N-terminal like
ENSMUSG00000061482.6	chr13	23581598	23581990	+	Hist1h4d	-1.740594191	2.17E-08	6.28E-07	6308	7084	6211	2025	2348	1918	6.757678075	7.09529277	6.940628012	5.210689478	5.370464684	4.993899009	Hist1h4d	ENSMUSG00000061482	319156	histone cluster 1, H4d
ENSMUSG00000099937.1	chr4	132270056	132270213	+	Gm28872	-1.507763359	2.20E-08	6.34E-07	1416	1317	1207	453	562	471	4.602711667	4.668429695	4.577709498	3.051585849	3.308650092	2.96924992	NA	NA	NA	NA
ENSMUSG00000001348.14	chr9	22126731	22135746	-	Acp5	3.754339928	2.21E-08	6.35E-07	26	18	31	341	325	413	-1.137482765	-1.485704185	-0.682818052	2.642368877	2.519454539	2.779879478	Acp5	ENSMUSG00000001348	11433	acid phosphatase 5, tartrate resistant
ENSMUSG00000077323.1	chr4	132270080	132270213	-	Rnu11	-1.495399191	2.20E-08	6.35E-07	1377	1278	1183	446	551	463	4.562433384	4.625078894	4.548746015	3.029143474	3.280157881	2.944561488	Rnu11	NA	353373	U11 small nuclear RNA
ENSMUSG00000001151.9	chr10	76351254	76442912	-	Pcnt	-1.199199359	2.23E-08	6.41E-07	3752	3508	3225	1563	1765	1558	6.008233137	6.081481096	5.995209126	4.837190613	4.958801911	4.694078399	Pcnt	ENSMUSG00000001151	18541	pericentrin (kendrin)
ENSMUSG00000081534.2	chr15	97784355	97792692	+	Slc48a1	0.941817954	2.24E-08	6.42E-07	1500	1377	1313	2810	2833	2957	4.685824384	4.732679052	4.699102509	5.683238208	5.641310293	5.618298412	Slc48a1	ENSMUSG00000081534	67739	solute carrier family 48 (heme transporter), member 1
ENSMUSG00000035439.13	chr8	71248561	71272934	-	Haus8	-1.387559087	2.26E-08	6.47E-07	1287	1139	1110	430	537	481	4.464953498	4.459027658	4.456895702	2.976496536	3.24306175	2.999527947	Haus8	ENSMUSG00000035439	76478	4HAUS augmin-like complex, subunit 8
ENSMUSG00000025584.17	chr7	81213596	81334533	+	Pde8a	1.090704847	2.28E-08	6.51E-07	1340	1061	1046	2495	2522	2808	4.523152285	4.356731105	4.371258621	5.511740297	5.47357936	5.543720047	Pde8a	ENSMUSG00000025584	18584	phosphodiesterase 8A
ENSMUSG00000035293.13	chr12	51348061	51376986	+	G2e3	-1.277843253	2.30E-08	6.54E-07	2057	1642	1697	760	844	770	5.141273496	4.986520104	5.069097883	3.797431546	3.894894418	3.677787106	G2e3	ENSMUSG00000035293	217558	G2/M-phase specific E3 ubiquitin ligase
ENSMUSG00000069265.2	chr13	23761853	23762386	-	Hist1h3a	-2.583112043	2.30E-08	6.55E-07	735	746	606	116	155	105	3.657178312	3.848840899	3.584265859	1.090813253	1.453711576	0.809235148	Hist1h3a	ENSMUSG00000069265	360198	histone cluster 1, H3a
ENSMUSG00000017550.14	chr11	80089400	80135794	+	Atad5	-1.293244136	2.32E-08	6.59E-07	4019	3323	3335	1375	1456	1843	6.107397116	6.003330087	6.04358935	4.652367533	4.681230792	4.93636766	Atad5	ENSMUSG00000017550	237877	ATPase family, AAA domain containing 5
ENSMUSG00000034187.18	chr11	103821782	103954056	-	Nsf	0.830765349	2.35E-08	6.67E-07	4974	4574	4423	8535	8713	9319	6.414932589	6.464240797	6.450874632	7.28588706	7.261977421	7.274172799	Nsf	ENSMUSG00000034187	18195	N-ethylmaleimide sensitive fusion protein
ENSMUSG00000026414.13	chr1	135836354	135852260	+	Tnnt2	-5.055503552	2.36E-08	6.68E-07	495	393	439	19	7	19	3.087338028	2.925062274	3.119621379	-1.487970673	-2.920168599	-1.626461822	Tnnt2	ENSMUSG00000026414	21956	troponin T2, cardiac
ENSMUSG00000019715.14	chr2	29935426	29960371	+	Gle1	-1.010041465	2.41E-08	6.81E-07	3995	3513	3583	1866	1838	2193	6.09875712	6.083535632	6.147055663	5.092746902	5.017254267	5.18715495	Gle1	ENSMUSG00000019715	74412	GLE1 RNA export mediator (yeast)
ENSMUSG00000024330.16	chr17	34039437	34066685	+	Col11a2	-2.390285087	2.44E-08	6.88E-07	770	630	725	146	171	120	3.724247927	3.605195009	3.842733828	1.421383963	1.595005572	1.001025295	Col11a2	ENSMUSG00000024330	12815	collagen, type XI, alpha 2
ENSMUSG00000025278.8	chr14	7817957	7951588	+	Flnb	0.900140918	2.45E-08	6.88E-07	8680	8086	7323	15766	15803	16414	7.21815921	7.286142144	7.178219606	8.17120192	8.120897293	8.090819144	Flnb	ENSMUSG00000025278	286940	filamin, beta
ENSMUSG00000058163.13	chr11	48887422	48902152	-	Gm5431	-3.276151411	2.47E-08	6.93E-07	202	177	173	16	22	22	1.796374878	1.776517663	1.778693877	-1.728978772	-1.335206098	-1.420010945	Gm5431	ENSMUSG00000058163	432555	predicted gene 5431
ENSMUSG00000086360.1	chr9	42022615	42034113	+	Gm16214	-1.342126536	2.47E-08	6.93E-07	855	759	777	311	326	371	3.875220825	3.873748603	3.942600889	2.509715462	2.523879987	2.62535436	Gm16214	NA	102640212	predicted gene 16214
ENSMUSG00000037572.16	chr14	47240944	47276857	-	Wdhd1	-0.904408718	2.49E-08	6.96E-07	3373	3105	3014	1688	1830	1905	5.854627227	5.905452301	5.897605038	4.948153573	5.010962864	4.984089852	Wdhd1	ENSMUSG00000037572	218973	WD repeat and HMG-box DNA binding protein 1
ENSMUSG00000024301.9	chr17	26917091	26932579	+	Kifc5b	-2.871312965	2.52E-08	7.05E-07	1268	1167	1104	171	241	125	4.443504585	4.494049283	4.449079728	1.648691875	2.088820185	1.059679513	Kifc5b	ENSMUSG00000024301	16580	kinesin family member C5B
ENSMUSG00000034413.14	chr17	26414829	26446349	+	Neurl1b	-1.778973123	2.53E-08	7.06E-07	523	482	492	164	149	153	3.166642508	3.219227581	3.283881939	1.588570882	1.39694248	1.350230805	Neurl1b	ENSMUSG00000034413	240055	neuralized E3 ubiquitin protein ligase 1B
ENSMUSG00000032405.9	chr9	62880077	62980879	-	Pias1	0.924853151	2.54E-08	7.08E-07	2530	2259	2251	4586	4512	5206	5.43980354	5.446630291	5.476572787	6.389805033	6.312652022	6.43423411	Pias1	ENSMUSG00000032405	56469	protein inhibitor of activated STAT 1
ENSMUSG00000035455.12	chr11	11787431	11808962	-	Fignl1	-1.402406622	2.56E-08	7.11E-07	1463	1129	1265	469	537	549	4.649803811	4.446311004	4.645393816	3.101608456	3.24306175	3.19011163	Fignl1	ENSMUSG00000035455	60530	fidgetin-like 1
ENSMUSG00000032231.14	chr9	69453620	69491795	+	Anxa2	1.629734241	2.62E-08	7.25E-07	4952	4886	4527	14908	18565	14350	6.40853804	6.559428225	6.48440095	8.090474598	8.353277355	7.896949343	Anxa2	ENSMUSG00000032231	12306	annexin A2
ENSMUSG00000043885.13	chr9	15709738	15742384	+	Slc36a4	0.992449034	2.64E-08	7.30E-07	2119	1804	1826	3830	4288	4102	5.184105032	5.122225877	5.174768063	6.129944115	6.239198211	6.090423578	Slc36a4	ENSMUSG00000043885	234967	solute carrier family 36 (proton/amino acid symporter), member 4
ENSMUSG00000020484.18	chr11	5520659	5525893	+	Xbp1	0.926549945	2.72E-08	7.52E-07	4370	4104	3808	7876	8666	8410	6.228179404	6.307833221	6.234909205	7.16996609	7.254174563	7.126111814	Xbp1	ENSMUSG00000020484	22433	X-box binding protein 1
ENSMUSG00000035678.7	chr17	57105385	57107757	+	Tnfsf9	-1.180485687	2.76E-08	7.61E-07	1932	1842	1557	805	826	876	5.05084948	5.152291353	4.944918472	3.880367887	3.863811815	3.86374624	Tnfsf9	ENSMUSG00000035678	21950	tumor necrosis factor (ligand) superfamily, member 9
ENSMUSG00000004846.10	chr5	136987019	136996648	+	Plod3	0.978652858	2.77E-08	7.62E-07	5239	5007	4847	10726	10475	10597	6.489810209	6.59471725	6.582927207	7.615518897	7.527672291	7.459572305	Plod3	ENSMUSG00000004846	26433	procollagen-lysine, 2-oxoglutarate 5-dioxygenase 3
ENSMUSG00000026955.13	chr2	25372321	25378213	+	Sapcd2	-3.940929542	2.77E-08	7.62E-07	416	415	390	34	36	18	2.836769466	3.003547116	2.949080762	-0.664848435	-0.637234635	-1.702410675	Sapcd2	ENSMUSG00000026955	72080	suppressor APC domain containing 2
ENSMUSG00000037922.13	chr3	136053363	136326066	-	Bank1	-1.279579956	2.83E-08	7.76E-07	1306	1062	1122	524	491	519	4.48608819	4.358089575	4.472401754	3.261426071	3.113988412	3.109115898	Bank1	ENSMUSG00000037922	242248	B cell scaffold protein with ankyrin repeats 1
ENSMUSG00000038042.9	chr13	48577873	48625573	-	Ptpdc1	4.604611541	2.85E-08	7.80E-07	9	7	10	198	260	252	-2.617475706	-2.788266956	-2.267780553	1.859622306	2.198080368	2.068275537	Ptpdc1	ENSMUSG00000038042	218232	protein tyrosine phosphatase domain containing 1
ENSMUSG00000028364.15	chr4	63959785	64047015	-	Tnc	5.25314303	2.88E-08	7.86E-07	4	9	4	232	235	234	-3.695478218	-2.447230038	-3.490172974	2.087714015	2.052524055	1.961580072	Tnc	ENSMUSG00000028364	21923	tenascin C
ENSMUSG00000026321.7	chr1	105780718	105847981	+	Tnfrsf11a	1.176437592	2.88E-08	7.87E-07	3205	2822	2736	6569	6434	8278	5.780930474	5.767600315	5.758018165	6.908194965	6.824553137	7.10328963	Tnfrsf11a	ENSMUSG00000026321	21934	tumor necrosis factor receptor superfamily, member 11a, NFKB activator
ENSMUSG00000019992.7	chr10	20347819	20361669	+	Mtfr2	-2.719774656	2.89E-08	7.88E-07	306	286	257	35	49	54	2.394340044	2.467233778	2.348330646	-0.623625772	-0.197702574	-0.143679716	Mtfr2	ENSMUSG00000019992	71804	mitochondrial fission regulator 2
ENSMUSG00000038884.14	chr9	20868642	20874307	+	A230050P20Rik	0.995271737	2.90E-08	7.88E-07	2896	2721	2393	5709	5446	5885	5.63469173	5.71502877	5.564808115	6.705775803	6.584054521	6.611085228	A230050P20Rik	ENSMUSG00000038884	319278	RIKEN cDNA A230050P20 gene
ENSMUSG00000022199.10	chr14	54906727	54913132	-	Slc22a17	3.018298034	2.91E-08	7.89E-07	56	66	34	414	439	466	-0.045224257	0.360124884	-0.551573519	2.9218554	2.952660161	2.95386923	Slc22a17	ENSMUSG00000022199	59049	solute carrier family 22 (organic cation transporter), member 17
ENSMUSG00000040204.6	chr9	65890237	65903266	+	2810417H13Rik	-1.090339852	2.91E-08	7.89E-07	5858	4937	4686	2481	2366	2925	6.650912392	6.574407482	6.534197192	5.503623848	5.381480012	5.602603462	Pclaf	ENSMUSG00000040204	68026	PCNA clamp associated factor
ENSMUSG00000052821.3	chrX	106574346	106603679	-	Cysltr1	-1.789624256	2.93E-08	7.93E-07	576	544	507	157	189	158	3.305773578	3.393630688	3.327166036	1.525835127	1.738994844	1.396474989	Cysltr1	ENSMUSG00000052821	58861	cysteinyl leukotriene receptor 1
ENSMUSG00000062585.11	chr4	135895394	135920207	+	Cnr2	-1.858637712	2.97E-08	8.02E-07	463	449	459	128	141	134	2.991022309	3.117019754	3.183823076	1.232251658	1.317599048	1.159598322	Cnr2	ENSMUSG00000062585	12802	cannabinoid receptor 2 (macrophage)
ENSMUSG00000034317.14	chr3	69035288	69044755	-	Trim59	-1.759416677	3.01E-08	8.11E-07	914	728	744	206	251	299	3.97143614	3.813627611	3.880030063	1.91662508	2.147355395	2.314548152	Trim59	ENSMUSG00000034317	66949	tripartite motif-containing 59
ENSMUSG00000102840.1	chr1	191820370	191821993	-	Gm38037	-3.930115594	3.02E-08	8.12E-07	207	214	177	12	17	12	1.831564307	2.049676286	1.811577239	-2.129516702	-1.697776177	-2.268007851	NA	NA	NA	NA
ENSMUSG00000002083.13	chr7	16308393	16318205	+	Bbc3	-1.263536544	3.07E-08	8.24E-07	3965	4145	3768	1777	1601	1922	6.087883849	6.322172853	6.219676702	5.022260953	4.818148888	4.996903842	Bbc3	ENSMUSG00000002083	170770	BCL2 binding component 3
ENSMUSG00000043154.15	chr9	101105084	101251795	-	Ppp2r3a	1.948581336	3.07E-08	8.24E-07	212	207	167	751	728	947	1.865915812	2.001809975	1.72791931	3.780256403	3.681725968	3.976118092	Ppp2r3d	ENSMUSG00000093803	19054	protein phosphatase 2 (formerly 2A), regulatory subunit B'', delta
ENSMUSG00000038886.10	chr7	80349097	80371375	-	Man2a2	-0.804114772	3.09E-08	8.27E-07	11409	9974	9667	6161	6205	6616	7.61254473	7.588871258	7.578829168	6.815693007	6.772272549	6.779988505	Man2a2	ENSMUSG00000038886	140481	mannosidase 2, alpha 2
ENSMUSG00000022177.8	chr14	54541785	54554361	-	Haus4	-1.403767723	3.10E-08	8.29E-07	701	618	630	237	267	283	3.588896074	3.577472234	3.640254585	2.118410812	2.236335887	2.235340884	Haus4	ENSMUSG00000022177	219072	HAUS augmin-like complex, subunit 4
ENSMUSG00000030342.8	chr6	125460266	125494791	-	Cd9	1.507635672	3.12E-08	8.31E-07	5466	5142	4374	13347	13877	18688	6.550998489	6.633096622	6.434804437	7.930909037	7.933400878	8.277999117	Cd9	ENSMUSG00000030342	12527	CD9 antigen
ENSMUSG00000072437.3	chr19	60755987	60759913	+	Nanos1	-1.017209948	3.12E-08	8.31E-07	1898	1626	1584	846	927	921	5.025241064	4.972397556	4.969713969	3.951993366	4.030144277	3.935976315	Nanos1	ENSMUSG00000072437	332397	nanos C2HC-type zinc finger 1
ENSMUSG00000049807.16	chr11	97415533	97502402	+	Arhgap23	1.383581359	3.13E-08	8.32E-07	494	438	416	1302	1144	1320	3.084423491	3.081275481	3.04207471	4.573694766	4.333442553	4.455004545	Arhgap23	ENSMUSG00000049807	58996	Rho GTPase activating protein 23
ENSMUSG00000019845.7	chr10	39134023	39151058	+	Tube1	-1.581392983	3.15E-08	8.36E-07	626	505	514	177	198	211	3.42576748	3.286409731	3.346929291	1.698302323	1.805936003	1.812649812	Tube1	ENSMUSG00000019845	71924	epsilon-tubulin 1
ENSMUSG00000032508.8	chr9	119335934	119341411	-	Myd88	0.908767355	3.25E-08	8.60E-07	3322	3151	2961	6271	6287	6366	5.832650265	5.926665396	5.872014395	6.841221937	6.791211585	6.724420709	Myd88	ENSMUSG00000032508	17874	myeloid differentiation primary response gene 88
ENSMUSG00000034303.6	chr9	37275835	37348392	-	Ccdc15	-1.615520538	3.26E-08	8.62E-07	937	885	881	304	271	373	4.007271661	4.095190946	4.123718784	2.476925526	2.257749193	2.633100392	Ccdc15	ENSMUSG00000034303	245902	coiled-coil domain containing 15
ENSMUSG00000001833.16	chr9	25252439	25308571	+	7-Sep	0.94034818	3.35E-08	8.84E-07	9030	7661	7512	14756	17005	17917	7.275186934	7.20825361	7.214979395	8.075690066	8.22665461	8.217217693	7-Sep	ENSMUSG00000001833	235072	septin 7
ENSMUSG00000031530.6	chr8	34807297	34819894	+	Dusp4	1.005841947	3.39E-08	8.93E-07	2051	1720	1823	3894	4134	3964	5.13706022	5.053454626	5.172396509	6.153849511	6.18643796	6.04105917	Dusp9	ENSMUSG00000031383	75590	dual specificity phosphatase 9
ENSMUSG00000099583.1	chr13	23575763	23576322	+	Hist1h3d	-2.539138196	3.40E-08	8.94E-07	1236	1454	1007	232	228	213	4.406643305	4.81115003	4.316466148	2.087714015	2.008991161	1.826228219	Hist1h3d	ENSMUSG00000099583	319149	histone cluster 1, H3d
ENSMUSG00000015143.14	chr12	80167542	80260371	-	Actn1	1.357269736	3.42E-08	8.95E-07	1506	1429	1345	3715	3462	4625	4.691581738	4.786137354	4.7338287	6.085967763	5.930539161	6.263529568	Actn1	ENSMUSG00000015143	109711	actinin, alpha 1
ENSMUSG00000034908.15	chr9	45937857	45955247	-	Sidt2	0.811699286	3.41E-08	8.95E-07	6310	5492	5422	10579	10615	11078	6.758135384	6.728089698	6.744644457	7.595610934	7.54682551	7.523610896	Sidt2	ENSMUSG00000034908	214597	SID1 transmembrane family, member 2
ENSMUSG00000026548.4	chr1	172475358	172478575	+	Slamf9	-2.657832901	3.43E-08	8.96E-07	377	323	294	55	67	47	2.694929615	2.642464351	2.542025848	0.021042975	0.249756403	-0.342008433	Slamf9	ENSMUSG00000026548	98365	SLAM family member 9
ENSMUSG00000049764.7	chr10	76032654	76043234	+	Zfp280b	-0.925216511	3.44E-08	8.99E-07	2166	1918	1935	1080	1112	1195	5.215747302	5.210605498	5.258392617	4.304110465	4.292530426	4.311534374	Zfp280b	ENSMUSG00000049764	64453	zinc finger protein 280B
ENSMUSG00000021365.14	chr13	41309916	41487320	-	Nedd9	-3.38624	3.51E-08	9.14E-07	308	228	273	26	22	34	2.40372346	2.140892804	2.435299047	-1.045452437	-1.335206098	-0.803339584	Nedd9	ENSMUSG00000021365	18003	neural precursor cell expressed, developmentally down-regulated gene 9
ENSMUSG00000023345.15	chr9	106281061	106350521	+	Poc1a	-1.617180002	3.51E-08	9.14E-07	629	564	547	219	189	199	3.432659348	3.44567222	3.436617179	2.004704238	1.738994844	1.728380895	Poc1a	ENSMUSG00000023345	70235	POC1 centriolar protein A
ENSMUSG00000045932.12	chr19	34550694	34576419	+	Ifit2	-2.702888323	3.53E-08	9.17E-07	248	246	250	38	44	39	2.091698822	2.250286285	2.308568817	-0.506586351	-0.351325763	-0.608083293	Ifit2	ENSMUSG00000045932	15958	interferon-induced protein with tetratricopeptide repeats 2
ENSMUSG00000055065.6	chr15	79527707	79546741	-	Ddx17	0.974884419	3.56E-08	9.25E-07	7715	6514	7053	14017	14178	16578	7.048140718	6.974281187	7.12402562	8.001568558	7.964358097	8.105161818	Ddx17	ENSMUSG00000055065	67040	DEAD (Asp-Glu-Ala-Asp) box polypeptide 17
ENSMUSG00000004771.12	chr9	64715299	64737758	-	Rab11a	1.066841138	3.58E-08	9.26E-07	3035	2797	2653	5820	5940	7328	5.702315239	5.754764865	5.713582858	6.733554484	6.709309455	6.927438181	Rab11a	ENSMUSG00000004771	53869	RAB11A, member RAS oncogene family
ENSMUSG00000048424.15	chr15	8968426	9066551	+	Ranbp3l	-8.597960448	3.58E-08	9.26E-07	841	785	691	0	3	5	3.851416242	3.922309914	3.773487465	-6.773372891	-4.019704272	-3.452432422	Ranbp3l	ENSMUSG00000048424	223332	RAN binding protein 3-like
ENSMUSG00000034329.16	chr11	86058138	86201193	-	Brip1	-1.771743387	3.60E-08	9.29E-07	2729	2133	2202	657	628	948	5.549017762	5.363848844	5.444828328	3.587474193	3.46870974	3.977639923	Brip1	ENSMUSG00000034329	237911	BRCA1 interacting protein C-terminal helicase 1
ENSMUSG00000026335.16	chr1	97795114	98095646	-	Pam	0.956378322	3.63E-08	9.35E-07	3106	2898	2821	5618	6478	6236	5.73567112	5.805933219	5.802148659	6.682596411	6.834384908	6.694656842	Pam	ENSMUSG00000026335	18484	peptidylglycine alpha-amidating monooxygenase
ENSMUSG00000034460.9	chr12	73099609	73113456	-	Six4	3.133912149	3.66E-08	9.42E-07	56	29	29	321	349	373	-0.045224257	-0.812514502	-0.777454926	2.555302036	2.622089451	2.633100392	Six4	ENSMUSG00000034460	20474	sine oculis-related homeobox 4
ENSMUSG00000101162.2	chr6	125494424	125509135	+	Gm26728	1.425853991	3.67E-08	9.42E-07	954	966	780	2243	2790	2726	4.033198168	4.221468371	3.948156846	5.358162577	5.619248737	5.500970399	Gm26728	NA	102635868	predicted gene, 26728
ENSMUSG00000025969.15	chr1	62703285	62818695	+	Nrp2	1.084204026	3.70E-08	9.49E-07	11966	10316	10140	23335	22150	28256	7.68131041	7.63750843	7.647743193	8.736865868	8.60799245	8.874431116	Nrp2	ENSMUSG00000025969	18187	neuropilin 2
ENSMUSG00000030929.17	chr7	119768679	119794058	-	Eri2	-1.439801197	3.77E-08	9.64E-07	1190	1017	930	348	433	456	4.351948686	4.295655528	4.201764364	2.671641954	2.932828989	2.922607009	Eri2	ENSMUSG00000030929	71151	exoribonuclease 2
ENSMUSG00000043017.9	chr7	16906490	16910905	+	Ptgir	1.472027194	3.77E-08	9.64E-07	377	337	324	993	926	1171	2.694929615	2.703586141	2.681976692	4.183003266	4.028587972	4.282277198	Ptgir	ENSMUSG00000043017	19222	prostaglandin I receptor (IP)
ENSMUSG00000099517.1	chr13	23535434	23535860	+	Hist1h3g	-3.026790981	3.81E-08	9.71E-07	1374	1660	1569	166	272	177	4.559287972	5.002244456	4.955991338	1.606005476	2.263053225	1.559811174	Hist1h3g	ENSMUSG00000099517	97908	histone cluster 1, H3g
ENSMUSG00000002105.15	chr2	91061791	91070417	-	Slc39a13	0.960269258	3.83E-08	9.75E-07	1697	1411	1508	3161	3073	3355	4.86379264	4.767855862	4.898801005	5.853020613	5.758607575	5.800448001	Slc39a13	ENSMUSG00000002105	68427	solute carrier family 39 (metal ion transporter), member 13
ENSMUSG00000024011.16	chr17	29318877	29329413	+	Pi16	-1.670923427	3.85E-08	9.75E-07	701	546	606	207	213	200	3.588896074	3.398920135	3.584265859	1.923594635	1.911033065	1.735594386	Pi16	ENSMUSG00000024011	74116	peptidase inhibitor 16
ENSMUSG00000029484.12	chr5	96793339	96845966	+	Anxa3	-2.159848549	3.84E-08	9.75E-07	755	593	564	176	150	133	3.695884726	3.517946669	3.480731795	1.690151482	1.406560482	1.148831891	Anxa3	ENSMUSG00000029484	11745	annexin A3
ENSMUSG00000097439.6	chr9	21225371	21233046	+	Gm16754	1.086816625	3.83E-08	9.75E-07	1780	1751	1540	3894	3570	4049	4.932663501	5.079217722	4.929084991	6.153849511	5.974851209	6.07166403	Gm16754	NA	100503569	predicted gene, 16754
ENSMUSG00000034792.8	chr10	81502306	81524225	-	Gna15	-1.051948278	3.86E-08	9.76E-07	2329	2282	2173	1171	1150	1177	5.320401396	5.461241594	5.425706405	4.420768347	4.340986074	4.289647304	Gna15	ENSMUSG00000034792	14676	guanine nucleotide binding protein, alpha 15
ENSMUSG00000097993.7	chr1	135108497	135132594	-	Ptprv	-1.444746417	3.88E-08	9.81E-07	1178	980	972	383	460	388	4.337332824	4.242216269	4.265456464	2.809709876	3.019998152	2.689906748	Ptprv	NA	13924	protein tyrosine phosphatase, receptor type, V
ENSMUSG00000091996.8	chr9	45182007	45250020	+	BC049352	2.330355645	3.90E-08	9.83E-07	51	45	46	241	250	279	-0.178902692	-0.187362911	-0.120939165	2.142506487	2.141607599	2.214840432	BC049352	ENSMUSG00000091996	408059	cDNA sequence BC049352
ENSMUSG00000061143.15	chr3	51685907	52105076	-	Maml3	1.214757017	3.91E-08	9.85E-07	1359	1302	1217	3166	2866	3626	4.543457217	4.651910106	4.589608081	5.855300473	5.658015369	5.912498093	Maml3	ENSMUSG00000061143	433586	mastermind like transcriptional coactivator 3
ENSMUSG00000030630.16	chr7	84585159	84606722	-	Fah	-2.724203678	3.97E-08	9.96E-07	391	322	320	70	44	55	2.747465278	2.637997799	2.664082571	0.366178461	-0.351325763	-0.117448174	Fah	ENSMUSG00000030630	14085	fumarylacetoacetate hydrolase
ENSMUSG00000062593.15	chr10	51480640	51496613	+	Lilrb4a	1.021341828	3.96E-08	9.96E-07	3937	3046	3120	6637	7279	7942	6.077660989	5.877779474	5.947463521	6.923051349	7.002564451	7.043513429	Lilrb4a	ENSMUSG00000062593	14728	leukocyte immunoglobulin-like receptor, subfamily B, member 4A
ENSMUSG00000030322.12	chr6	115840697	115853371	-	Mbd4	-1.079805903	3.98E-08	9.96E-07	1460	1273	1237	601	682	725	4.646843424	4.619425693	4.613114834	3.459048036	3.587626041	3.590967763	Mbd4	ENSMUSG00000030322	17193	methyl-CpG binding domain protein 4
ENSMUSG00000087633.1	chr2	172425804	172440560	-	Gm14455	1.402504887	3.98E-08	9.96E-07	347	298	318	835	971	919	2.575465948	2.52642957	2.655051587	3.933123127	4.097010991	3.932841724	NA	NA	NA	NA
ENSMUSG00000027187.10	chr2	103453849	103485160	-	Cat	1.313448869	3.99E-08	9.96E-07	8315	7351	7950	19596	18635	25009	7.156184079	7.148665381	7.296731902	8.484935495	8.358706713	8.698324554	Cat	ENSMUSG00000027187	12359	catalase
ENSMUSG00000035929.11	chr17	35379617	35385290	+	H2-Q4	-1.628413763	4.02E-08	1.00E-06	1115	1169	1088	397	413	358	4.258071579	4.496518595	4.428027716	2.861438159	2.864684325	2.573965268	H2-Q4	ENSMUSG00000035929	15015	histocompatibility 2, Q region locus 4
ENSMUSG00000042476.12	chr5	8893717	8959231	+	Abcb4	1.044394703	4.04E-08	1.01E-06	2200	2014	2105	4283	4962	4706	5.238212437	5.281048539	5.379849184	6.291201482	6.449792193	6.288574839	Abcb4	ENSMUSG00000042476	18670	ATP-binding cassette, sub-family B (MDR/TAP), member 4
ENSMUSG00000029392.12	chr5	124493080	124531391	-	Rilpl1	1.248826485	4.11E-08	1.02E-06	523	435	391	1104	1154	1159	3.166642508	3.071371357	2.952770522	4.335804812	4.345993263	4.267423064	Rilpl1	ENSMUSG00000029392	75695	Rab interacting lysosomal protein-like 1
ENSMUSG00000017652.16	chr2	165055627	165072948	+	Cd40	-1.723879097	4.15E-08	1.03E-06	576	503	557	180	158	191	3.305773578	3.280690417	3.462730019	1.722482135	1.481279836	1.669336541	Cd40	ENSMUSG00000017652	21939	CD40 antigen
ENSMUSG00000075585.3	chr5	138995056	139000577	+	6330403L08Rik	2.398302027	4.14E-08	1.03E-06	88	125	98	562	534	636	0.602202331	1.276386003	0.961953844	3.362336395	3.234986943	3.402152663	6330403L08Rik	NA	70744	RIKEN cDNA 6330403L08 gene
ENSMUSG00000025888.5	chr9	5298517	5307265	+	Casp1	0.942937068	4.16E-08	1.03E-06	2602	2228	2086	4277	4783	5149	5.480279229	5.426699694	5.36677123	6.289179248	6.396791689	6.418352602	Casp1	ENSMUSG00000025888	12362	caspase 1
ENSMUSG00000055240.16	chr17	33360507	33394641	-	Zfp101	-1.399447693	4.19E-08	1.03E-06	922	769	736	312	299	372	3.984001882	3.892619965	3.864443739	2.514339488	2.399352998	2.629232575	Zfp101	ENSMUSG00000055240	22643	zinc finger protein 101
ENSMUSG00000018920.11	chr11	70453983	70459984	-	Cxcl16	0.792122564	4.26E-08	1.05E-06	6646	5831	5697	10397	11357	11885	6.832975893	6.81449376	6.816015328	7.570576173	7.644298491	7.625050935	Cxcl16	ENSMUSG00000018920	66102	chemokine (C-X-C motif) ligand 16
ENSMUSG00000021263.10	chr12	108686792	108702306	-	Degs2	-1.664537963	4.28E-08	1.05E-06	656	525	551	166	211	207	3.493247982	3.342389403	3.4471191	1.606005476	1.897454659	1.785103485	Degs2	ENSMUSG00000021263	70059	delta(4)-desaturase, sphingolipid 2
ENSMUSG00000029334.14	chr5	98929773	99037351	-	Prkg2	5.343787192	4.28E-08	1.05E-06	3	4	6	171	215	222	-4.058048297	-3.52523255	-2.959658258	1.648691875	1.924484865	1.885797485	Prkg2	ENSMUSG00000029334	19092	protein kinase, cGMP-dependent, type II
ENSMUSG00000045751.16	chr4	24496451	24602950	+	Mms22l	-1.262031732	4.28E-08	1.05E-06	1548	1294	1207	546	652	604	4.731252448	4.643021699	4.577709498	3.320704794	3.522774897	3.327734488	Mms22l	ENSMUSG00000045751	212377	MMS22-like, DNA repair protein
ENSMUSG00000044934.12	chr13	64133022	64153202	-	Zfp367	-1.465252797	4.31E-08	1.06E-06	1237	1215	1236	416	529	487	4.407809591	4.552176627	4.611948549	2.928799794	3.22142768	3.017394368	Zfp367	ENSMUSG00000044934	238673	zinc finger protein 367
ENSMUSG00000042644.8	chr17	27057304	27122223	+	Itpr3	-0.881243501	4.32E-08	1.06E-06	5405	5106	5110	2973	2981	3116	6.534809136	6.622961539	6.659150757	5.764573469	5.714763427	5.693846957	Itpr3	ENSMUSG00000042644	16440	inositol 1,4,5-triphosphate receptor 3
ENSMUSG00000032182.14	chr9	21588709	21592831	-	Yipf2	0.855442883	4.38E-08	1.07E-06	2798	2566	2471	5020	4823	5312	5.585034813	5.630428994	5.611073215	6.520242445	6.408805457	6.46331118	Yipf2	ENSMUSG00000032182	74766	Yip1 domain family, member 2
ENSMUSG00000039952.15	chr9	108204634	108263958	-	Dag1	0.805896119	4.42E-08	1.08E-06	3746	3475	3359	6432	6413	6931	6.005924517	6.067847278	6.053932839	6.877790945	6.819836975	6.847087834	Dag1	ENSMUSG00000039952	13138	dystroglycan 1
ENSMUSG00000069305.3	chr13	21831767	21832196	-	Hist1h4n	-2.339549267	4.42E-08	1.08E-06	533	570	469	106	130	97	3.193941242	3.460925525	3.214883372	0.961336729	1.200846802	0.695466273	Hist1h4n	ENSMUSG00000069305	319161	histone cluster 1, H4n
ENSMUSG00000003308.14	chr9	21229730	21239332	-	Keap1	1.050046449	4.43E-08	1.08E-06	3946	4075	3646	8716	8287	8813	6.080954815	6.2976038	6.172198703	7.316160349	7.189662056	7.193635297	Keap1	ENSMUSG00000003308	50868	kelch-like ECH-associated protein 1
ENSMUSG00000038178.16	chr11	75531694	75577575	+	Slc43a2	0.868043345	4.44E-08	1.08E-06	7474	7070	6928	13493	13296	15187	7.00235814	7.092438974	7.098229356	7.946604097	7.871699724	7.978732747	Slc43a2	ENSMUSG00000038178	215113	solute carrier family 43, member 2
ENSMUSG00000002835.8	chr17	56040416	56068026	+	Chaf1a	-1.047658267	4.45E-08	1.08E-06	3419	3340	3331	1762	1651	1810	5.874166455	6.010690792	6.041858203	5.010034651	4.86250206	4.910308421	Chaf1a	ENSMUSG00000002835	27221	chromatin assembly factor 1, subunit A (p150)
ENSMUSG00000026048.16	chr1	44147744	44181260	+	Ercc5	-0.898359089	4.45E-08	1.08E-06	5125	4132	4326	2423	2603	2745	6.458073814	6.317641553	6.418886712	5.469503476	5.519177497	5.510989155	Ercc5	ENSMUSG00000026048	22592	excision repair cross-complementing rodent repair deficiency, complementation group 5
ENSMUSG00000025507.13	chr7	141438113	141444025	-	Pidd1	-1.103100669	4.49E-08	1.08E-06	3848	3193	3286	1802	1571	1764	6.044677313	5.945765184	6.022238294	5.042410653	4.790867362	4.873179674	Pidd1	ENSMUSG00000025507	57913	p53 induced death domain protein 1
ENSMUSG00000059791.14	chr17	35861318	35865402	+	Nrm	-1.38180405	4.49E-08	1.08E-06	885	809	742	303	366	331	3.924945277	3.965729719	3.87614924	2.472179815	2.690610194	2.461001019	Nrm	ENSMUSG00000059791	106582	nurim (nuclear envelope membrane protein)
ENSMUSG00000041064.13	chr9	65587160	65595967	+	Pif1	-1.720463399	4.57E-08	1.10E-06	521	447	448	135	173	152	3.161120223	3.110586321	3.148866199	1.30877615	1.611732658	1.340801392	Pif1	ENSMUSG00000041064	208084	PIF1 5'-to-3' DNA helicase
ENSMUSG00000042659.15	chr7	68736995	68749241	-	Arrdc4	1.423623415	4.65E-08	1.12E-06	257	269	240	708	740	747	2.143025403	2.378983912	2.249795108	3.695251152	3.705296731	3.634065728	Arrdc4	ENSMUSG00000042659	66412	arrestin domain containing 4
ENSMUSG00000086712.2	chr4	53261356	53270232	-	AI427809	4.52393421	4.70E-08	1.13E-06	4	3	3	85	92	103	-3.695478218	-3.887802629	-3.852743054	0.644479623	0.704322266	0.781622917	AI427809	ENSMUSG00000086712	381524	expressed sequence AI427809
ENSMUSG00000044948.16	chr19	47737561	47919299	-	Cfap43	-1.344917023	4.71E-08	1.13E-06	1012	890	904	366	436	381	4.118302973	4.10331425	4.160878717	2.744296497	2.942778649	2.663675206	Cfap43	ENSMUSG00000044948	100048534	cilia and flagella associated protein 43
ENSMUSG00000000982.5	chr11	83647844	83649355	-	Ccl3	0.921619635	4.74E-08	1.13E-06	7490	6107	6145	12449	12685	14813	7.005443089	6.881208692	6.925216702	7.83042729	7.80383357	7.942760887	Ccl3	ENSMUSG00000000982	20302	chemokine (C-C motif) ligand 3
ENSMUSG00000008393.8	chr16	8658587	8672153	-	Carhsp1	-0.897891108	4.77E-08	1.14E-06	5382	4687	4630	2717	2931	2777	6.52865748	6.499445424	6.516854293	5.634691429	5.690364147	5.527707155	Carhsp1	ENSMUSG00000008393	52502	calcium regulated heat stable protein 1
ENSMUSG00000032281.11	chr9	54604877	54661870	-	Acsbg1	0.91825432	4.78E-08	1.14E-06	1310	1189	1209	2328	2551	2616	4.490498419	4.520982005	4.580097078	5.411812275	5.490070732	5.441558503	Acsbg1	ENSMUSG00000032281	94180	acyl-CoA synthetase bubblegum family member 1
ENSMUSG00000074622.4	chr2	160363703	160367065	-	Mafb	1.298249309	4.78E-08	1.14E-06	774	625	693	1843	1649	2012	3.731718209	3.593708523	3.777654097	5.07485881	4.860753868	5.062909027	Mafb	ENSMUSG00000074622	16658	v-maf musculoaponeurotic fibrosarcoma oncogene family, protein B (avian)
ENSMUSG00000024590.8	chr18	56707813	56753424	+	Lmnb1	-1.353120212	4.86E-08	1.15E-06	1732	1589	1464	709	687	611	4.893236418	4.93919975	4.856094502	3.697285983	3.598156709	3.344344648	Lmnb1	ENSMUSG00000024590	16906	lamin B1
ENSMUSG00000034485.9	chr9	60794548	60880370	+	Uaca	1.122409131	4.86E-08	1.15E-06	616	526	554	1313	1311	1321	3.402553865	3.34513217	3.454945674	4.585827594	4.529942898	4.456096669	Uaca	ENSMUSG00000034485	72565	uveal autoantigen with coiled-coil domains and ankyrin repeats
ENSMUSG00000028693.15	chr4	116601052	116627941	-	Nasp	-0.990423994	4.88E-08	1.16E-06	5375	4942	4766	2405	2915	2816	6.526780018	6.575867699	6.558616605	5.458748193	5.682468413	5.547823715	Nasp	ENSMUSG00000028693	50927	nuclear autoantigenic sperm protein (histone-binding)
ENSMUSG00000047250.13	chr2	36230426	36252272	+	Ptgs1	-2.953635823	4.95E-08	1.17E-06	291	295	293	44	30	48	2.321948854	2.511856769	2.537118717	-0.29763946	-0.896321857	-0.311951199	Ptgs1	ENSMUSG00000047250	19224	prostaglandin-endoperoxide synthase 1
ENSMUSG00000020250.9	chr10	82859206	82897724	+	Txnrd1	0.85573695	4.98E-08	1.18E-06	10958	9703	9562	18348	20489	19620	7.554359496	7.549131947	7.563074152	8.390001615	8.495537964	8.348210146	Txnrd1	ENSMUSG00000020250	50493	thioredoxin reductase 1
ENSMUSG00000031629.14	chr8	46552028	46580007	+	Cenpu	-1.161748602	5.00E-08	1.18E-06	1216	1026	1025	526	481	553	4.383117386	4.308360361	4.342013801	3.26691683	3.084332794	3.200575466	Cenpu	ENSMUSG00000031629	71876	centromere protein U
ENSMUSG00000020592.14	chr12	8771323	8793715	+	Sdc1	1.795150053	5.02E-08	1.18E-06	239	215	205	796	903	757	2.038478626	2.056386508	2.022896608	3.86415766	3.992321597	3.653238038	Sdc1	ENSMUSG00000020592	20969	syndecan 1
ENSMUSG00000026833.18	chr2	28192992	28230736	+	Olfm1	0.855309011	5.05E-08	1.19E-06	8954	8236	7456	14918	15333	17425	7.262993943	7.312658146	7.204184913	8.091441973	8.077340227	8.177048391	Olfm1	ENSMUSG00000026833	56177	olfactomedin 1
ENSMUSG00000039982.7	chr19	12466341	12501996	-	Dtx4	-1.362377517	5.05E-08	1.19E-06	1297	1084	999	498	435	470	4.476115604	4.387656787	4.304964781	3.188076803	2.939469714	2.966186872	Dtx4	ENSMUSG00000039982	207521	deltex 4, E3 ubiquitin ligase
ENSMUSG00000038644.14	chr7	44532746	44548849	-	Pold1	-1.123246186	5.07E-08	1.19E-06	3390	3501	3081	1607	1679	1605	5.86187911	6.078599821	5.9293191	4.877230131	4.886756886	4.736942909	Pold1	ENSMUSG00000038644	18971	polymerase (DNA directed), delta 1, catalytic subunit
ENSMUSG00000032123.4	chr9	44326845	44333600	+	Dpagt1	1.014483087	5.12E-08	1.20E-06	841	750	693	1637	1611	1679	3.851416242	3.85655071	3.777654097	4.9039063	4.827129279	4.801952039	Dpagt1	ENSMUSG00000032123	13478	dolichyl-phosphate (UDP-N-acetylglucosamine) acetylglucosaminephosphotransferase 1 (GlcNAc-1-P transferase)
ENSMUSG00000068744.12	chr3	108383839	108388231	+	Psrc1	-0.852242418	5.13E-08	1.20E-06	4823	4458	4416	2693	2659	2759	6.370461432	6.427185151	6.44858982	5.621893458	5.549880127	5.518327129	Psrc1	ENSMUSG00000068744	56742	proline/serine-rich coiled-coil 1
ENSMUSG00000030259.12	chr6	145746748	145821079	+	Rassf8	2.649700227	5.18E-08	1.21E-06	91	89	86	574	693	537	0.650296619	0.788658226	0.774530252	3.392790191	3.610692878	3.158256904	Rassf8	ENSMUSG00000030259	71323	Ras association (RalGDS/AF-6) domain family (N-terminal) member 8
ENSMUSG00000031016.9	chr7	110122046	110143286	+	Wee1	-1.352146553	5.17E-08	1.21E-06	947	838	757	314	383	367	4.022578914	4.016509422	3.905004103	2.523543315	2.756023573	2.609736399	Wee1	ENSMUSG00000031016	22390	WEE 1 homolog 1 (S. pombe)
ENSMUSG00000037628.9	chr14	46760541	46771525	+	Cdkn3	-2.597964281	5.23E-08	1.22E-06	250	225	198	36	45	37	2.103263574	2.121826072	1.972897221	-0.583548333	-0.319264554	-0.68304535	Cdkn3	ENSMUSG00000037628	72391	cyclin-dependent kinase inhibitor 3
ENSMUSG00000041126.16	chr11	6427229	6444443	-	H2afv	-1.535562095	5.23E-08	1.22E-06	845	735	663	269	301	257	3.858257725	3.82742398	3.71385468	2.300768571	2.408954998	2.096564581	H2afv	ENSMUSG00000041126	77605	H2A histone family, member V
ENSMUSG00000015243.4	chr4	53030787	53159895	-	Abca1	1.141314024	5.35E-08	1.24E-06	1310	1215	1079	2764	3006	2723	4.490498419	4.552176627	4.416049552	5.659429965	5.726810049	5.499382111	Abca1	ENSMUSG00000015243	11303	ATP-binding cassette, sub-family A (ABC1), member 1
ENSMUSG00000056724.14	chr9	110624789	110654161	-	Nbeal2	1.079088054	5.41E-08	1.25E-06	2804	2792	2577	6148	6394	5918	5.588124648	5.752184014	5.671658737	6.812645884	6.815556646	6.619151826	Nbeal2	ENSMUSG00000056724	235627	neurobeachin-like 2
ENSMUSG00000069273.2	chr13	23561534	23562369	-	Hist1h3e	-1.651516209	5.43E-08	1.26E-06	3895	4117	3416	1346	1423	1134	6.06218958	6.312395383	6.078205436	4.621625623	4.648167583	4.235976853	Hist1h3e	ENSMUSG00000069273	319151	histone cluster 1, H3e
ENSMUSG00000079505.2	chr17	35377021	35380292	-	Gm11131	-1.836731111	5.55E-08	1.28E-06	586	635	606	184	184	177	3.330584079	3.616590764	3.584265859	1.754104115	1.700417812	1.559811174	Gm11131	NA	102634822	predicted gene 11131
ENSMUSG00000028560.11	chr4	98923810	98935543	+	Usp1	-0.846928572	5.61E-08	1.29E-06	4598	3962	3857	2244	2530	2602	6.301544406	6.257037669	6.253352466	5.35880549	5.478147565	5.433818407	Usp1	ENSMUSG00000028560	230484	ubiquitin specific peptidase 1
ENSMUSG00000063445.14	chr16	4710059	4719356	-	Nmral1	-1.198170647	5.60E-08	1.29E-06	1854	1769	1705	761	918	810	4.991411333	5.093968495	5.075881064	3.799327335	4.016076717	3.750804335	Nmral1	ENSMUSG00000063445	67824	NmrA-like family domain containing 1
ENSMUSG00000027189.16	chr2	102300119	102407828	-	Trim44	0.85240515	5.65E-08	1.30E-06	2923	2422	2460	4643	4953	5461	5.648077657	5.547123399	5.604637825	6.407624028	6.447173342	6.503217485	Trim44	ENSMUSG00000027189	80985	tripartite motif-containing 44
ENSMUSG00000074796.10	chr2	130684113	130697519	-	Slc4a11	-1.201412415	5.65E-08	1.30E-06	2382	1925	2226	902	1028	1104	5.352857279	5.215859857	5.460463921	4.04441023	4.179266884	4.197313663	Slc4a11	ENSMUSG00000074796	269356	solute carrier family 4, sodium bicarbonate transporter-like, member 11
ENSMUSG00000068735.14	chr2	93187548	93201759	+	Trp53i11	-1.274499683	5.73E-08	1.31E-06	1925	1815	1771	802	706	940	5.045614188	5.130993664	5.130657774	3.874984691	3.637486556	3.965420093	Trp53i11	ENSMUSG00000068735	277414	transformation related protein 53 inducible protein 11
ENSMUSG00000017002.14	chr2	164354070	164389095	-	Slpi	-5.461706395	5.77E-08	1.32E-06	237	214	245	9	5	3	2.026380484	2.049676286	2.279481239	-2.525445378	-3.367627576	-4.104509119	Slpi	ENSMUSG00000017002	20568	secretory leukocyte peptidase inhibitor
ENSMUSG00000025358.15	chr10	128697939	128705051	-	Cdk2	-0.869979943	5.76E-08	1.32E-06	4064	3591	3591	2057	2092	2438	6.123458953	6.115213249	6.150272824	5.233303824	5.203952713	5.339914216	Cdk2	ENSMUSG00000025358	12566	cyclin-dependent kinase 2
ENSMUSG00000028961.15	chr4	149149991	149166771	-	Pgd	0.956506599	5.79E-08	1.32E-06	8882	7782	7207	16897	15230	17318	7.251346849	7.230860405	7.155185241	8.271149302	8.06761649	8.168162319	Pgd	ENSMUSG00000028961	110208	phosphogluconate dehydrogenase
ENSMUSG00000021714.14	chr13	104228955	104249615	+	Cenpk	-1.797475234	5.84E-08	1.33E-06	380	360	335	112	113	105	2.706349424	2.798697898	2.73007098	1.0404083	0.999489293	0.809235148	Cenpk	ENSMUSG00000021714	60411	centromere protein K
ENSMUSG00000055884.7	chr12	65075606	65132058	+	Fancm	-1.040776072	5.84E-08	1.33E-06	1996	1619	1658	837	957	941	5.097854137	4.966175202	5.035565321	3.936572489	4.076069482	3.966953244	Fancm	ENSMUSG00000055884	104806	Fanconi anemia, complementation group M
ENSMUSG00000085485.1	chr2	129246376	129268526	+	Gm14024	-3.303765099	5.84E-08	1.33E-06	216	202	207	29	17	22	1.892819995	1.966620547	2.03686955	-0.890729842	-1.697776177	-1.420010945	Gm14024	NA	671466	predicted gene 14024
ENSMUSG00000021569.9	chr13	73911347	73937767	-	Trip13	-1.013440069	5.93E-08	1.34E-06	2595	2244	2181	1162	1150	1411	5.476393553	5.43702083	5.431006783	4.409642109	4.340986074	4.551149373	Trip13	ENSMUSG00000021569	69716	thyroid hormone receptor interactor 13
ENSMUSG00000070348.5	chr7	144929931	144939925	-	Ccnd1	0.777566993	5.93E-08	1.34E-06	21156	19462	18706	34901	36764	37011	8.503410137	8.553251868	8.531154058	9.31762853	9.33896655	9.263821945	Ccnd1	ENSMUSG00000070348	12443	cyclin D1
ENSMUSG00000036086.16	chr1	127954184	128103047	-	Zranb3	-1.31774783	5.95E-08	1.35E-06	661	557	565	247	258	258	3.504194127	3.427670444	3.483285238	2.177911824	2.186961276	2.102156429	Zranb3	ENSMUSG00000036086	226409	zinc finger, RAN-binding domain containing 3
ENSMUSG00000020901.13	chr11	68432121	68497849	+	Pik3r5	1.393050217	5.97E-08	1.35E-06	4727	4525	4572	12275	11203	15761	6.341458524	6.448703931	6.498669479	7.810121277	7.624602689	8.032253179	Pik3r5	ENSMUSG00000020901	320207	phosphoinositide-3-kinase regulatory subunit 5
ENSMUSG00000058385.7	chr13	23571408	23571884	+	Hist1h2bg	-2.003175964	5.98E-08	1.35E-06	409	404	439	102	114	116	2.812316422	2.964838341	3.119621379	0.906107208	1.012144594	0.952322104	Hist1h2bg	ENSMUSG00000058385	319181	histone cluster 1, H2bg
ENSMUSG00000049811.16	chr11	23007531	23030788	+	Fam161a	1.32913836	6.00E-08	1.35E-06	1051	906	963	2316	2952	2604	4.172829915	4.129005659	4.252042881	5.404358076	5.70066215	5.434926681	Fam161a	ENSMUSG00000049811	73873	family with sequence similarity 161, member A
ENSMUSG00000067389.3	chr17	45586120	45588377	+	Gm17080	-1.445038006	5.99E-08	1.35E-06	632	517	502	213	217	216	3.43951845	3.320257501	3.31288181	1.964719368	1.937812396	1.846359174	NA	NA	NA	NA
ENSMUSG00000050232.6	chrX	101731535	101734269	-	Cxcr3	1.708917867	6.05E-08	1.36E-06	242	218	256	835	877	789	2.056437718	2.076331918	2.34271704	3.933123127	3.950196121	3.712931415	Cxcr3	ENSMUSG00000050232	12766	chemokine (C-X-C motif) receptor 3
ENSMUSG00000001661.5	chr15	102998257	103011881	+	Hoxc6	-5.918119684	6.16E-08	1.37E-06	60	52	64	0	1	1	0.053460018	0.019087967	0.35112928	-6.773372891	-5.242096694	-5.32690154	Hoxc6	ENSMUSG00000001661	15425	homeobox C6
ENSMUSG00000029910.14	chr6	66535390	66547220	+	Mad2l1	-1.607799963	6.17E-08	1.37E-06	6273	4974	4943	1850	1542	2331	6.749651616	6.585178257	6.611219141	5.080326529	4.76399558	5.275178674	Mad2l1	ENSMUSG00000029910	56150	MAD2 mitotic arrest deficient-like 1
ENSMUSG00000052013.14	chr16	45224315	45252895	+	Btla	-5.754993202	6.17E-08	1.37E-06	510	415	413	12	3	15	3.130363932	3.003547116	3.031645543	-2.129516702	-4.019704272	-1.95766773	Btla	ENSMUSG00000052013	208154	B and T lymphocyte associated
ENSMUSG00000059890.15	chr9	44923131	44965600	-	Ube4a	0.843220622	6.14E-08	1.37E-06	5380	4479	4576	8521	9007	10159	6.528121311	6.433964442	6.49993099	7.283518797	7.309851837	7.39867774	Ube4a	ENSMUSG00000059890	140630	ubiquitination factor E4A
ENSMUSG00000079555.2	chr5	34153880	34169527	-	Haus3	-1.141551208	6.16E-08	1.37E-06	1668	1363	1307	623	733	742	4.838932752	4.717941434	4.692497255	3.510872858	3.691593961	3.624383175	Haus3	ENSMUSG00000079555	231123	HAUS augmin-like complex, subunit 3
ENSMUSG00000049848.7	chr7	19875742	19887965	-	Ceacam19	1.605331617	6.18E-08	1.38E-06	206	181	206	645	588	698	1.824594752	1.808668187	2.029899996	3.560900394	3.373839411	3.536252265	Ceacam19	ENSMUSG00000049848	319930	carcinoembryonic antigen-related cell adhesion molecule 19
ENSMUSG00000034394.14	chr11	4257557	4272514	+	Lif	1.882949088	6.24E-08	1.39E-06	240	245	272	1018	862	1108	2.044489864	2.244421663	2.430014444	4.218857374	3.925321452	4.202529014	Lif	ENSMUSG00000034394	16878	leukemia inhibitory factor
ENSMUSG00000019726.10	chr13	13590409	13777440	+	Lyst	-0.91360753	6.28E-08	1.39E-06	2621	2345	2484	1339	1412	1476	5.490773611	5.500522234	5.618641851	4.614105974	4.636975958	4.6161016	Lyst	ENSMUSG00000019726	17101	lysosomal trafficking regulator
ENSMUSG00000040723.14	chr1	165646516	165709757	-	Rcsd1	-0.923967672	6.28E-08	1.39E-06	4786	4515	4448	2571	2635	2544	6.359352175	6.445512479	6.459005261	5.555021547	5.536801782	5.401302435	Rcsd1	ENSMUSG00000040723	226594	RCSD domain containing 1
ENSMUSG00000072620.3	chr11	83065112	83070678	+	Slfn2	0.805545658	6.35E-08	1.41E-06	3738	3112	3175	6081	6218	6389	6.002840598	5.908700571	5.972670079	6.796838601	6.775291712	6.729623284	Slfn2	ENSMUSG00000072620	20556	schlafen 2
ENSMUSG00000023066.9	chr18	88971790	89131013	+	Rttn	-1.026811432	6.37E-08	1.41E-06	1604	1320	1356	681	755	807	4.782504855	4.671711035	4.745575357	3.639196955	3.734228751	3.745454409	Rttn	ENSMUSG00000023066	246102	rotatin
ENSMUSG00000101355.1	chr13	21717659	21718069	+	Hist1h3h	-2.965999268	6.40E-08	1.41E-06	369	408	314	56	52	41	2.664027335	2.979034717	2.636818231	0.046806071	-0.112813677	-0.536824609	Hist1h3h	ENSMUSG00000101355	319152	histone cluster 1, H3h
ENSMUSG00000027353.14	chr2	132816141	132844197	+	Mcm8	-1.39710628	6.41E-08	1.41E-06	1024	894	856	350	425	354	4.13530105	4.109780121	4.08221146	2.679897743	2.905956127	2.557777776	Mcm8	ENSMUSG00000027353	66634	minichromosome maintenance 8 homologous recombination repair factor
ENSMUSG00000021108.17	chr12	73584797	73778185	+	Prkch	0.985322946	6.43E-08	1.41E-06	1124	957	1003	1982	2272	2276	4.269664726	4.207971126	4.310726926	5.179732259	5.323005385	5.240737703	Prkch	ENSMUSG00000021108	18755	protein kinase C, eta
ENSMUSG00000070372.11	chr3	104822779	104864505	-	Capza1	0.845167396	6.52E-08	1.43E-06	6919	5636	5616	10713	11522	12596	6.891048858	6.765426329	6.795357684	7.61376936	7.665106953	7.708871268	Capza1	ENSMUSG00000070372	12340	capping protein (actin filament) muscle Z-line, alpha 1
ENSMUSG00000006676.16	chr9	108490602	108502337	+	Usp19	0.858313209	6.55E-08	1.44E-06	7970	7434	7023	14732	14080	14631	7.095051295	7.164862452	7.117876453	8.073341754	7.95435175	7.924926019	Usp19	ENSMUSG00000006676	71472	ubiquitin specific peptidase 19
ENSMUSG00000040195.11	chr10	127666901	127701049	+	Nemp1	-1.530290399	6.58E-08	1.44E-06	2744	2142	2074	747	773	1067	5.556924405	5.369921938	5.358449966	3.772556878	3.768198287	4.148156314	Nemp1	ENSMUSG00000040195	210035	nuclear envelope integral membrane protein 1
ENSMUSG00000072980.3	chr2	119609512	119618469	-	Oip5	-2.338029383	6.58E-08	1.44E-06	313	292	318	67	54	74	2.426918413	2.497135263	2.655051587	0.303442706	-0.05887487	0.30730448	Oip5	ENSMUSG00000072980	70645	Opa interacting protein 5
ENSMUSG00000039146.5	chr3	151758737	151762892	-	Ifi44l	-4.423757449	6.61E-08	1.44E-06	302	262	224	10	22	9	2.375388113	2.341016061	2.150473659	-2.381055469	-1.335206098	-2.663936527	Ifi44l	ENSMUSG00000039146	15061	interferon-induced protein 44 like
ENSMUSG00000047821.16	chr11	62820231	62850808	+	Trim16	2.678899661	6.64E-08	1.45E-06	70	53	77	398	425	546	0.274148133	0.046309435	0.61602643	2.865063023	2.905956127	3.182213645	Trim16	ENSMUSG00000047821	94092	tripartite motif-containing 16
ENSMUSG00000050410.15	chr17	35512734	35516824	-	Tcf19	-1.222165596	6.74E-08	1.47E-06	1468	1315	1246	602	670	577	4.654724331	4.666237982	4.623569192	3.46144454	3.562034328	3.261813095	Tcf19	ENSMUSG00000050410	106795	transcription factor 19
ENSMUSG00000058812.2	chr2	163644850	163645801	+	0610039K10Rik	-1.150440049	6.76E-08	1.47E-06	1649	1641	1538	778	797	751	4.822409843	4.985641483	4.927210753	3.831180338	3.812281514	3.641765253	0610039K10Rik	ENSMUSG00000058812	68386	RIKEN cDNA 0610039K10 gene
ENSMUSG00000043015.15	chr1	52630703	52651919	+	Nemp2	-1.900527804	6.77E-08	1.47E-06	511	410	459	110	127	159	3.13318721	2.986080861	3.183823076	1.014529668	1.167294243	1.405548573	Nemp2	ENSMUSG00000043015	227094	nuclear envelope integral membrane protein 2
ENSMUSG00000018930.3	chr11	83662584	83664683	+	Ccl4	1.043442932	6.81E-08	1.48E-06	1435	1219	1239	2799	3015	2760	4.621934396	4.556916492	4.61544458	5.677580573	5.731122326	5.518849845	Ccl4	ENSMUSG00000018930	20303	chemokine (C-C motif) ligand 4
ENSMUSG00000029108.14	chr5	57717967	58133230	+	Pcdh7	1.040226794	6.83E-08	1.48E-06	9499	8182	8254	17644	17405	22244	7.348232645	7.303168431	7.350867138	8.333558037	8.260196444	8.529297009	Pcdh7	ENSMUSG00000029108	54216	protocadherin 7
ENSMUSG00000027695.16	chr3	27938695	28133362	+	Pld1	1.421540562	6.87E-08	1.48E-06	282	245	285	768	729	826	2.276703838	2.244421663	2.49724896	3.812528558	3.683704974	3.779006968	Pld1	ENSMUSG00000027695	18805	phospholipase D1
ENSMUSG00000063760.9	chr10	31493193	31609184	-	Rnf217	4.955575621	6.86E-08	1.48E-06	12	4	6	208	267	247	-2.22154703	-3.52523255	-2.959658258	1.930530682	2.236335887	2.039420674	Rnf217	ENSMUSG00000063760	268291	ring finger protein 217
ENSMUSG00000032480.17	chr9	110084320	110117830	-	Dhx30	0.778383758	6.97E-08	1.50E-06	6719	6185	5690	11158	11143	11748	6.848734951	6.899516953	6.81424173	7.672482592	7.616855617	7.60832491	Dhx30	ENSMUSG00000032480	72831	DEAH (Asp-Glu-Ala-His) box polypeptide 30
ENSMUSG00000092283.1	chr2	158117154	158117905	+	Gm20412	2.401584828	7.05E-08	1.52E-06	60	68	49	348	307	345	0.053460018	0.402874532	-0.030741356	2.671641954	2.437383406	2.52067786	NA	NA	NA	NA
ENSMUSG00000030144.4	chr6	123262111	123275265	+	Clec4d	0.733325646	7.07E-08	1.52E-06	6424	5645	5519	9766	10433	11049	6.783965243	6.767728094	6.770223891	7.480253032	7.521876388	7.519829427	Clec4d	ENSMUSG00000030144	17474	C-type lectin domain family 4, member d
ENSMUSG00000033222.16	chr3	100938860	100969663	-	Ttf2	-0.907242969	7.07E-08	1.52E-06	3432	2870	2742	1560	1739	1847	5.879640786	5.791928789	5.76117793	4.834419751	4.937397769	4.939494608	Ttf2	ENSMUSG00000033222	74044	transcription termination factor, RNA polymerase II
ENSMUSG00000029283.17	chr5	106964322	106984432	+	Cdc7	-1.162513883	7.10E-08	1.52E-06	2134	1837	1819	811	874	1092	5.194279228	5.148370983	5.16922836	3.891074393	3.94525538	4.181553524	Cdc7	ENSMUSG00000029283	12545	cell division cycle 7 (S. cerevisiae)
ENSMUSG00000022876.17	chr16	75858793	76022270	-	Samsn1	-1.518653132	7.19E-08	1.54E-06	1757	1506	1618	500	580	759	4.913905755	4.861827406	5.000343674	3.193853367	3.354093063	3.657042114	Samsn1	ENSMUSG00000022876	67742	SAM domain, SH3 domain and nuclear localization signals, 1
ENSMUSG00000030921.17	chr7	104409025	104465193	-	Trim30a	-1.467378339	7.19E-08	1.54E-06	1396	1105	1041	425	405	539	4.582196639	4.415325759	4.364349148	2.95964243	2.83649891	3.163615109	Trim30a	ENSMUSG00000030921	20128	tripartite motif-containing 30A
ENSMUSG00000040943.12	chr3	133463679	133545139	-	Tet2	1.000537309	7.24E-08	1.54E-06	7309	6307	6453	13301	13201	16611	6.970153789	6.927695035	6.995768115	7.925928435	7.861355048	8.108030692	Tet2	ENSMUSG00000040943	214133	tet methylcytosine dioxygenase 2
ENSMUSG00000109408.1	chr11	119448788	119491298	-	Gm44935	-0.872700532	7.23E-08	1.54E-06	2375	2047	2146	1230	1265	1336	5.348612272	5.304490185	5.407672482	4.491656051	4.478432598	4.472380081	NA	NA	NA	NA
ENSMUSG00000026826.13	chr2	57106830	57124003	-	Nr4a2	1.65208088	7.27E-08	1.55E-06	595	508	463	1512	1628	2165	3.352554479	3.294946413	3.196327553	4.789346536	4.84226881	5.168620416	Nr4a2	ENSMUSG00000026826	18227	nuclear receptor subfamily 4, group A, member 2
ENSMUSG00000056091.12	chr6	72097592	72154571	+	St3gal5	0.968498286	7.33E-08	1.56E-06	1964	1844	1632	3794	3835	3731	5.074543233	5.153856523	5.012769301	6.116321188	6.078139752	5.95367593	St3gal5	ENSMUSG00000056091	20454	ST3 beta-galactoside alpha-2,3-sialyltransferase 5
ENSMUSG00000028527.18	chr4	101419277	101466995	+	Ak4	-1.949743308	7.39E-08	1.57E-06	494	380	417	120	130	107	3.084423491	2.876595092	3.045534412	1.139516445	1.200846802	0.836328809	Ak4	ENSMUSG00000028527	11639	adenylate kinase 4
ENSMUSG00000040990.17	chrX	159627272	159978069	+	Sh3kbp1	2.035889284	7.42E-08	1.57E-06	305	230	255	1047	1005	1441	2.389625351	2.153465389	2.337081505	4.259361637	4.146638172	4.581491081	Sh3kbp1	ENSMUSG00000040990	58194	SH3-domain kinase binding protein 1
ENSMUSG00000031803.8	chr8	71690756	71701789	-	B3gnt3	1.307519947	7.50E-08	1.59E-06	467	461	422	1140	1085	1358	3.003419335	3.155029287	3.062709555	4.38207784	4.257084816	4.495934809	B3gnt3	ENSMUSG00000031803	72297	UDP-GlcNAc:betaGal beta-1,3-N-acetylglucosaminyltransferase 3
ENSMUSG00000019659.8	chr9	110656503	110711606	+	Ccdc12	1.056047784	7.53E-08	1.59E-06	1275	1251	1263	2824	2820	2776	4.451443964	4.594285025	4.643111973	5.690406894	5.634676027	5.52718764	Ccdc12	ENSMUSG00000019659	72654	coiled-coil domain containing 12
ENSMUSG00000025283.15	chrX	155213132	155216449	-	Sat1	-0.847505688	7.53E-08	1.59E-06	7056	5794	6001	3400	3820	3967	6.919333854	6.805310912	6.891009438	5.958158285	6.072486551	6.042150467	Sat1	ENSMUSG00000025283	20229	spermidine/spermine N1-acetyl transferase 1
ENSMUSG00000036103.8	chr18	9707648	9877995	+	Colec12	0.847296021	7.61E-08	1.61E-06	6409	5358	5064	9924	10627	11760	6.780592883	6.692455938	6.646106153	7.503405814	7.548455444	7.609797737	Colec12	ENSMUSG00000036103	140792	collectin sub-family member 12
ENSMUSG00000108655.1	chr7	80088982	80090431	-	Gm44949	1.23959629	7.72E-08	1.63E-06	365	337	371	843	899	965	2.648324377	2.703586141	2.877120425	3.946871367	3.985920277	4.003268408	NA	NA	NA	NA
ENSMUSG00000046688.14	chr3	127789805	127832164	+	Tifa	-1.764442874	7.75E-08	1.63E-06	907	816	794	235	222	346	3.960350614	3.978151524	3.973805434	2.106210358	1.970602332	2.524847501	Tifa	ENSMUSG00000046688	211550	TRAF-interacting protein with forkhead-associated domain
ENSMUSG00000005161.15	chr8	84969587	84974834	+	Prdx2	0.842656408	7.78E-08	1.63E-06	6825	5827	5446	10594	11378	12690	6.871315799	6.813503833	6.75101574	7.59765499	7.646963568	7.719597251	Prdx2	ENSMUSG00000005161	21672	peroxiredoxin 2
ENSMUSG00000006673.14	chr9	108516806	108560163	+	Qrich1	0.868892972	7.78E-08	1.63E-06	7125	6587	6276	12343	12167	14624	6.933372318	6.99035779	6.955646594	7.818091017	7.74368596	7.92423564	Qrich1	ENSMUSG00000006673	69232	glutamine-rich 1
ENSMUSG00000030745.9	chr7	125603429	125633570	+	Il21r	-4.805420256	7.79E-08	1.63E-06	245	162	159	7	7	6	2.074175995	1.649138357	1.657314638	-2.866482296	-2.920168599	-3.211424323	Il21r	ENSMUSG00000030745	60504	interleukin 21 receptor
ENSMUSG00000027959.13	chr3	116594982	116631004	+	Sass6	-0.80777911	7.89E-08	1.65E-06	5319	4589	4640	2771	2854	3265	6.511671713	6.468963722	6.519966569	5.663078401	5.651963153	5.761224152	Sass6	ENSMUSG00000027959	72776	SAS-6 centriolar assembly protein
ENSMUSG00000059412.6	chr9	45403138	45410278	+	Fxyd2	1.1222403	7.92E-08	1.66E-06	28276	27128	25738	59987	56160	74040	8.921912718	9.032364108	8.991542382	10.0990014	9.950208965	10.26416298	Fxyd2	ENSMUSG00000059412	11936	FXYD domain-containing ion transport regulator 2
ENSMUSG00000002565.16	chr12	40059769	40134228	-	Scin	7.415187863	7.96E-08	1.66E-06	8	1	3	522	666	773	-2.777940378	-5.11019505	-3.852743054	3.255914336	3.553401871	3.683393441	Scin	ENSMUSG00000002565	20259	scinderin
ENSMUSG00000068394.4	chr2	125563088	125625113	-	Cep152	-1.154755178	7.97E-08	1.66E-06	1028	929	899	403	487	483	4.140922859	4.165153504	4.152881496	2.883051972	3.102199214	3.005508039	Cep152	ENSMUSG00000068394	99100	centrosomal protein 152
ENSMUSG00000093327.1	chr18	60812076	60812163	+	Mir5107	-1.21032782	8.20E-08	1.71E-06	4007	3927	3780	1916	1838	1673	6.103083586	6.244238009	6.224263363	5.130885391	5.017254267	4.796788795	Mir5107	ENSMUSG00000093327	100628611	microRNA 5107
ENSMUSG00000078773.11	chr4	11558922	11615805	+	Rad54b	-1.950986962	8.32E-08	1.73E-06	806	689	691	146	234	234	3.790127504	3.73424919	3.773487465	1.421383963	2.046384918	1.961580072	Rad54b	ENSMUSG00000078773	623474	RAD54 homolog B (S. cerevisiae)
ENSMUSG00000048216.13	chr6	13834458	13839942	-	Gpr85	2.59400607	8.40E-08	1.74E-06	62	36	36	265	280	308	0.100381065	-0.505332992	-0.470273417	2.279195159	2.304797766	2.357262638	Gpr85	ENSMUSG00000048216	64450	G protein-coupled receptor 85
ENSMUSG00000032322.14	chr9	56089962	56128888	+	Pstpip1	0.978232367	8.63E-08	1.78E-06	3541	3480	3260	6942	7684	7043	5.924741608	6.069921308	6.010779529	6.987866665	7.080676483	6.870212743	Pstpip1	ENSMUSG00000032322	19200	proline-serine-threonine phosphatase-interacting protein 1
ENSMUSG00000038781.6	chr17	55997081	56005570	-	Stap2	-2.325692372	8.62E-08	1.78E-06	376	372	368	90	85	65	2.691102835	2.845939064	2.865422833	0.726472996	0.590793321	0.121558961	Stap2	ENSMUSG00000038781	106766	signal transducing adaptor family member 2
ENSMUSG00000026421.14	chr1	135720061	135752232	+	Csrp1	-1.213722832	8.65E-08	1.79E-06	6371	5649	5818	2708	2354	3217	6.772014122	6.768749923	6.846333586	5.629905484	5.374145813	5.739860392	Csrp1	ENSMUSG00000026421	13007	cysteine and glycine-rich protein 1
ENSMUSG00000036766.12	chr1	84369839	84696221	-	Dner	2.552568014	8.66E-08	1.79E-06	52	71	65	378	419	374	-0.151157702	0.464713786	0.373325026	2.790776599	2.885467806	2.636957868	Dner	ENSMUSG00000036766	227325	delta/notch-like EGF repeat containing
ENSMUSG00000074305.9	chr9	56201126	56418067	-	Peak1	0.881243386	8.67E-08	1.79E-06	7768	6304	6631	12557	13064	15145	7.058017125	6.927008691	7.035021544	7.842888763	7.846305097	7.974737545	Peak1	ENSMUSG00000074305	244895	pseudopodium-enriched atypical kinase 1
ENSMUSG00000022895.14	chr16	95702075	95721051	+	Ets2	-0.756433703	8.78E-08	1.80E-06	8604	7171	7254	4548	4866	5134	7.205472426	7.11290164	7.164562492	6.377802246	6.421609645	6.414144037	Ets2	ENSMUSG00000022895	23872	E26 avian leukemia oncogene 2, 3' domain
ENSMUSG00000055675.6	chr8	15011025	15033333	+	Kbtbd11	0.865547344	8.78E-08	1.80E-06	2983	2862	2736	5543	5620	5548	5.677386842	5.787902427	5.758018165	6.663208532	6.629423569	6.526018045	Kbtbd11	ENSMUSG00000055675	74901	kelch repeat and BTB (POZ) domain containing 11
ENSMUSG00000042099.15	chr17	33810520	33822918	+	Kank3	-0.825774663	8.86E-08	1.82E-06	2405	2170	2181	1276	1368	1431	5.366717865	5.388654156	5.431006783	4.544604931	4.591320525	4.571447914	Kank3	ENSMUSG00000042099	80880	KN motif and ankyrin repeat domains 3
ENSMUSG00000025239.2	chr9	123478701	123521548	+	Limd1	0.838667415	8.97E-08	1.84E-06	5190	4770	4443	8559	8745	10290	6.476254585	6.524767218	6.457382797	7.289937918	7.267265959	7.417161421	Limd1	ENSMUSG00000025239	29806	LIM domains containing 1
ENSMUSG00000021377.14	chr13	47084775	47106201	-	Dek	-1.015439919	9.01E-08	1.84E-06	10407	8816	8935	4409	4735	5813	7.479932719	7.410832778	7.465234769	6.333026469	6.382241852	6.593327239	Dek	ENSMUSG00000021377	110052	DEK oncogene (DNA binding)
ENSMUSG00000005370.3	chr17	87975050	87990883	+	Msh6	-0.7679106	9.11E-08	1.86E-06	9402	8097	7919	4860	5354	5742	7.333425467	7.288103297	7.291095657	6.473516125	6.559476954	6.575599195	Msh6	ENSMUSG00000005370	17688	mutS homolog 6
ENSMUSG00000029449.11	chr5	123103044	123132692	-	Rhof	0.791651205	9.17E-08	1.87E-06	2341	2194	2187	3940	4171	4334	5.327814103	5.404519004	5.434969326	6.170790094	6.199291336	6.169785827	Rhof	ENSMUSG00000029449	23912	ras homolog family member F (in filopodia)
ENSMUSG00000041219.14	chr2	113831492	113848661	-	Arhgap11a	-1.039958802	9.17E-08	1.87E-06	3742	3026	2728	1567	1575	1765	6.004383382	5.868277085	5.753794353	4.840876836	4.794534845	4.873997065	Arhgap11a	ENSMUSG00000041219	228482	Rho GTPase activating protein 11A
ENSMUSG00000046785.8	chr9	111271929	111279093	+	Epm2aip1	0.936949366	9.26E-08	1.89E-06	1842	1588	1646	3168	3324	3924	4.982045685	4.938291824	5.025088821	5.856211409	5.871862468	6.026429103	Epm2aip1	ENSMUSG00000046785	77781	EPM2A (laforin) interacting protein 1
ENSMUSG00000056888.11	chr10	111985448	112002631	-	Glipr1	-0.835746795	9.38E-08	1.91E-06	25976	21713	21924	12755	13448	15520	8.799516219	8.711147121	8.760158345	7.86545894	7.888098454	8.010023374	Glipr1	ENSMUSG00000056888	73690	GLI pathogenesis-related 1 (glioma)
ENSMUSG00000022912.8	chr16	62854307	62929346	+	Pros1	-0.868229061	9.44E-08	1.91E-06	4579	3731	3873	2160	2451	2514	6.295571156	6.17038242	6.259324049	5.303776624	5.432389852	5.384191797	Pros1	ENSMUSG00000022912	19128	protein S (alpha)
ENSMUSG00000027002.13	chr2	80500512	80581380	-	Nckap1	2.551274406	9.43E-08	1.91E-06	48	39	31	216	262	264	-0.265490377	-0.391376803	-0.682818052	1.984850323	2.209114418	2.135259871	Nckap1	ENSMUSG00000027002	50884	NCK-associated protein 1
ENSMUSG00000032185.14	chr9	21546894	21589487	+	Carm1	0.814585396	9.48E-08	1.92E-06	4806	4231	4074	8233	7679	8729	6.365367799	6.3517959	6.33230934	7.233917233	7.079737473	7.179819267	Carm1	ENSMUSG00000032185	59035	coactivator-associated arginine methyltransferase 1
ENSMUSG00000022833.6	chr16	34690616	34725194	+	Ccdc14	-1.193325158	9.66E-08	1.95E-06	921	899	818	372	400	462	3.982437136	4.11782192	4.016740631	2.767723724	2.818599238	2.941445515	Ccdc14	ENSMUSG00000022833	239839	coiled-coil domain containing 14
ENSMUSG00000078521.2	chr4	134510999	134523927	+	Aunip	-3.118624094	9.72E-08	1.96E-06	314	315	230	38	27	40	2.431512988	2.606338644	2.188524965	-0.506586351	-1.045699481	-0.572014038	Aunip	ENSMUSG00000078521	69885	aurora kinase A and ninein interacting protein
ENSMUSG00000018986.9	chr11	83191330	83215154	+	Slfn3	-1.525940447	9.74E-08	1.96E-06	992	838	796	329	269	382	4.089520073	4.016509422	3.977432576	2.590761764	2.247082268	2.667451897	Slfn3	ENSMUSG00000018986	20557	schlafen 3
ENSMUSG00000038608.15	chr1	80501073	80758527	-	Dock10	0.733782079	9.99E-08	2.01E-06	8168	6948	7148	12363	13168	14029	7.130452243	7.067328305	7.143326856	7.820426704	7.857744205	7.864311932	Dock10	ENSMUSG00000038608	210293	dedicator of cytokinesis 10
ENSMUSG00000074403.2	chr3	96268654	96269141	+	Hist2h3b	-2.165113183	1.01E-07	2.04E-06	744	887	827	171	224	190	3.674724819	4.098445758	4.032517526	1.648691875	1.98351244	1.661783147	Hist2h3b	ENSMUSG00000074403	319154	histone cluster 2, H3b
ENSMUSG00000050390.12	chr4	129219578	129261404	-	C77080	1.62638084	1.02E-07	2.04E-06	435	454	534	1536	1408	1730	2.901125689	3.132978933	3.401948162	4.81205916	4.632884654	4.845109185	C77080	ENSMUSG00000050390	97130	expressed sequence C77080
ENSMUSG00000026790.19	chr2	29889221	29931746	+	Odf2	-0.758611898	1.02E-07	2.05E-06	6057	5151	5223	3330	3317	3728	6.699103565	6.635619307	6.690703116	5.928150175	5.868821556	5.952515585	Odf2	ENSMUSG00000026790	18286	outer dense fiber of sperm tails 2
ENSMUSG00000027454.10	chr2	150905400	150931280	+	Gins1	-2.175038604	1.02E-07	2.05E-06	388	372	309	67	100	87	2.736367569	2.845939064	2.613697623	0.303442706	0.823992497	0.539347071	Gins1	ENSMUSG00000027454	69270	GINS complex subunit 1 (Psf1 homolog)
ENSMUSG00000057337.13	chr10	60181532	60219260	-	Chst3	1.569205142	1.02E-07	2.05E-06	330	281	303	888	871	1159	2.503103242	2.441833561	2.585454731	4.021855075	3.94029766	4.267423064	Chst3	ENSMUSG00000057337	53374	carbohydrate (chondroitin 6/keratan) sulfotransferase 3
ENSMUSG00000031925.16	chr9	13619990	13709533	+	Maml2	2.477515914	1.03E-07	2.05E-06	92	49	65	375	376	456	0.665978241	-0.065800931	0.373325026	2.779296206	2.72944686	2.922607009	Maml2	ENSMUSG00000031925	270118	mastermind like transcriptional coactivator 2
ENSMUSG00000074415.11	chr9	41327260	41655483	+	2610203C20Rik	3.250384117	1.03E-07	2.06E-06	64	38	86	579	543	710	0.145824036	-0.42837101	0.774530252	3.40529196	3.259077031	3.560826798	3110039I08Rik	ENSMUSG00000074415	73144	RIKEN cDNA 3110039I08 gene
ENSMUSG00000055148.7	chr8	72319033	72321656	+	Klf2	1.749907734	1.04E-07	2.08E-06	160	124	136	535	489	489	1.461026268	1.264844381	1.432659165	3.291369873	3.108105855	3.023301009	Klf2	ENSMUSG00000055148	16598	Kruppel-like factor 2 (lung)
ENSMUSG00000029304.14	chr5	104435118	104441050	+	Spp1	0.871018767	1.06E-07	2.11E-06	42121	36936	32831	66781	72006	79544	9.496865974	9.477601995	9.342695069	10.25378799	10.30878033	10.36761052	Spp1	ENSMUSG00000029304	20750	secreted phosphoprotein 1
ENSMUSG00000079677.1	chr9	21067520	21073514	-	Fdx1l	0.799576307	1.06E-07	2.11E-06	2028	1905	1733	3281	3549	3711	5.120794368	5.200796342	5.099374145	5.906766826	5.966340904	5.945922613	Fdx1l	ENSMUSG00000079677	68165	ferredoxin 1-like
ENSMUSG00000050212.4	chr4	126147744	126149875	+	Eva1b	2.08493817	1.07E-07	2.12E-06	116	107	84	425	524	447	0.998782925	1.053035298	0.740781461	2.95964243	3.207739768	2.893879831	Eva1b	ENSMUSG00000050212	230752	eva-1 homolog B (C. elegans)
ENSMUSG00000025498.15	chr7	141262706	141266481	-	Irf7	-1.200928687	1.07E-07	2.12E-06	2114	2138	1744	903	850	1032	5.180697626	5.367225941	5.108499906	4.046007899	3.905108231	4.100062025	Irf7	ENSMUSG00000025498	54123	interferon regulatory factor 7
ENSMUSG00000028121.8	chr3	122294136	122530191	+	Bcar3	2.387417347	1.07E-07	2.12E-06	108	119	69	500	597	533	0.896148013	1.205709257	0.458843097	3.193853367	3.395735709	3.14748042	Bcar3	ENSMUSG00000028121	29815	breast cancer anti-estrogen resistance 3
ENSMUSG00000029521.7	chr5	110839979	110874145	+	Chek2	-1.007387815	1.07E-07	2.12E-06	2374	1985	1980	1020	1222	1129	5.348004822	5.260129094	5.29155101	4.221687576	4.428559556	4.229604515	Chek2	ENSMUSG00000029521	50883	checkpoint kinase 2
ENSMUSG00000033769.16	chr6	84618487	85069513	-	Exoc6b	0.968915832	1.07E-07	2.12E-06	743	616	668	1329	1407	1502	3.672785713	3.572799533	3.724685774	4.60329517	4.631860013	4.641285235	Exoc6b	ENSMUSG00000033769	75914	exocyst complex component 6B
ENSMUSG00000034336.3	chr19	47014698	47025327	+	Ina	6.813915359	1.07E-07	2.12E-06	4	7	5	656	551	868	-3.695478218	-2.788266956	-3.200666357	3.585278309	3.280157881	3.850517998	Ina	ENSMUSG00000034336	226180	internexin neuronal intermediate filament protein, alpha
ENSMUSG00000074825.4	chr2	127138772	127143442	-	Itpripl1	-0.712373452	1.07E-07	2.12E-06	7347	6670	6385	4327	4384	4590	6.977634519	7.008421639	6.9804859	6.305945213	6.27113742	6.252571545	Itpripl1	ENSMUSG00000074825	73338	inositol 1,4,5-triphosphate receptor interacting protein-like 1
ENSMUSG00000002870.8	chr6	88883474	88898780	-	Mcm2	-0.86097156	1.08E-07	2.12E-06	7657	7643	6872	4185	4460	4402	7.037254527	7.204860141	7.086521311	6.257811371	6.295930529	6.192243248	Mcm2	ENSMUSG00000002870	17216	minichromosome maintenance complex component 2
ENSMUSG00000030123.15	chr6	115954811	115995005	-	Plxnd1	-0.966981002	1.09E-07	2.13E-06	2743	2699	2504	1469	1451	1426	5.556398641	5.70331895	5.630208921	4.747736752	4.676269662	4.566399991	Plxnd1	ENSMUSG00000030123	67784	plexin D1
ENSMUSG00000073434.11	chr17	25844771	25861501	-	Wdr90	-1.535102893	1.12E-07	2.19E-06	1059	1114	997	403	420	350	4.183764653	4.42702335	4.302075055	2.883051972	2.888902796	2.541406593	Wdr90	ENSMUSG00000073434	106618	WD repeat domain 90
ENSMUSG00000026360.9	chr1	143999338	144004161	-	Rgs2	-1.059386375	1.13E-07	2.21E-06	1176	968	924	487	529	553	4.334882386	4.224450687	4.192431534	3.155885517	3.22142768	3.200575466	Rgs2	ENSMUSG00000026360	19735	regulator of G-protein signaling 2
ENSMUSG00000008658.15	chr16	6809222	7412479	+	Rbfox1	2.475944111	1.14E-07	2.23E-06	421	439	432	2444	2001	3405	2.853985602	3.084561804	3.096458347	5.481950799	5.139806706	5.821786876	Rbfox1	ENSMUSG00000008658	268859	RNA binding protein, fox-1 homolog (C. elegans) 1
ENSMUSG00000027323.10	chr2	119112793	119147445	+	Rad51	-0.914110369	1.14E-07	2.24E-06	1340	1248	1192	678	701	765	4.523152285	4.590822555	4.559675575	3.632832114	3.627240099	3.668394527	Rad51	ENSMUSG00000027323	19361	RAD51 recombinase
ENSMUSG00000030091.17	chr6	91013068	91116829	-	Nup210	-0.815558851	1.15E-07	2.24E-06	5726	5237	4940	3213	3258	3180	6.618034708	6.659505072	6.610343365	5.876556866	5.842933085	5.72317383	Nup210	ENSMUSG00000030091	54563	nucleoporin 210
ENSMUSG00000031506.11	chr1	135132700	135145317	+	Ptpn7	-0.70936651	1.15E-07	2.24E-06	13487	11645	11519	7472	7888	8594	7.85393212	7.812327411	7.831692502	7.094002385	7.118476088	7.157333955	Ptpn7	ENSMUSG00000031506	320139	protein tyrosine phosphatase, non-receptor type 7
ENSMUSG00000034168.6	chr12	86880703	86884814	-	Irf2bpl	0.813319629	1.15E-07	2.24E-06	3269	3153	2893	5636	5543	6336	5.809451089	5.927580667	5.838501953	6.687210988	6.609522229	6.717606424	Irf2bpl	ENSMUSG00000034168	238330	interferon regulatory factor 2 binding protein-like
ENSMUSG00000032336.17	chr9	58582240	58657955	+	Nptn	0.799343069	1.15E-07	2.24E-06	3924	3612	3598	6367	7229	7145	6.072889925	6.123624321	6.153081967	6.863138448	6.992620963	6.89095521	Nptn	ENSMUSG00000032336	20320	neuroplastin
ENSMUSG00000079575.3	chr6	46529354	46530794	-	Rbpsuh-rs3	0.87197623	1.15E-07	2.24E-06	1247	1104	1184	2184	2274	2458	4.419420881	4.414020152	4.549964508	5.319714499	5.324274525	5.351698599	Rbpj-ps3	NA	19667	recombination signal binding protein for immunoglobulin kappa J region, pseudogene 3
ENSMUSG00000027580.17	chr2	181227615	181242027	-	Helz2	-0.783576873	1.17E-07	2.26E-06	6442	5864	5364	3624	3480	3856	6.788001697	6.822634845	6.729130019	6.050193382	5.938019665	6.001212355	Helz2	ENSMUSG00000027580	229003	helicase with zinc finger 2, transcriptional coactivator
ENSMUSG00000070047.13	chr8	44935447	45052257	+	Fat1	-0.761075057	1.17E-07	2.26E-06	18224	15133	16029	10032	10352	10703	8.288188394	8.190300514	8.308343829	7.519020644	7.510632388	7.473930968	Fat1	ENSMUSG00000070047	14107	FAT atypical cadherin 1
ENSMUSG00000021200.14	chr12	103321142	103356001	-	Asb2	-3.333227677	1.17E-07	2.27E-06	115	117	109	10	11	14	0.986345822	1.181359395	1.114689084	-2.381055469	-2.303497238	-2.053883046	Asb2	ENSMUSG00000021200	65256	ankyrin repeat and SOCS box-containing 2
ENSMUSG00000021822.2	chr14	20836662	20843388	+	Plau	-0.962315669	1.17E-07	2.27E-06	1990	1629	1796	967	955	1043	5.093511937	4.975056086	5.150875244	4.14474496	4.073052869	4.115350844	Plau	ENSMUSG00000021822	18792	plasminogen activator, urokinase
ENSMUSG00000021306.10	chr13	13357623	13393624	-	Gpr137b	0.896141076	1.18E-07	2.27E-06	1194	1158	1123	2293	2233	2388	4.356787919	4.482884778	4.473686433	5.389962301	5.298031345	5.310025121	Gpr137b	ENSMUSG00000021306	83924	G protein-coupled receptor 137B
ENSMUSG00000107215.1	chr6	3336772	3339354	-	Gm43197	-2.591877123	1.18E-07	2.27E-06	247	189	209	33	46	35	2.085881496	1.870896487	2.050708458	-0.707283701	-0.287900383	-0.762116921	NA	NA	NA	NA
ENSMUSG00000079037.9	chr2	131909928	131938429	+	Prnp	2.324458506	1.19E-07	2.29E-06	66	92	61	348	407	403	0.189879216	0.836223909	0.28241653	2.671641954	2.843597055	2.744560822	Prnp	ENSMUSG00000079037	19122	prion protein
ENSMUSG00000059895.12	chr15	73723145	73758766	+	Ptp4a3	-0.817985022	1.19E-07	2.30E-06	9137	8537	8049	5309	5019	5265	7.292180566	7.364440407	7.314585481	6.600987401	6.466268753	6.450490777	Ptp4a3	ENSMUSG00000059895	19245	protein tyrosine phosphatase 4a3
ENSMUSG00000038685.18	chr2	181319739	181356616	+	Rtel1	-0.758952367	1.20E-07	2.31E-06	4390	3828	3741	2344	2454	2758	6.234766312	6.207405991	6.209303084	5.421691672	5.434154257	5.517804224	Rtel1	ENSMUSG00000038685	269400	regulator of telomere elongation helicase 1
ENSMUSG00000015217.11	chrX	71555918	71560676	+	Hmgb3	-1.259768688	1.22E-07	2.33E-06	1998	1845	1724	787	715	1001	5.099298638	5.154638471	5.091864438	3.847763222	3.655748762	4.056082665	Hmgb3	ENSMUSG00000015217	15354	high mobility group box 3
ENSMUSG00000092463.1	chrX	101261405	101269023	-	Gm20489	-1.025897589	1.22E-07	2.34E-06	1673	1494	1284	735	777	816	4.843249616	4.850289631	4.666893199	3.74920864	3.775639671	3.761445035	NA	NA	NA	NA
ENSMUSG00000002885.14	chr8	83723251	83741326	-	Adgre5	-1.407013622	1.22E-07	2.34E-06	518	454	405	177	187	189	3.15279696	3.132978933	3.003460128	1.698302323	1.723687591	1.654189997	Adgre5	ENSMUSG00000002885	26364	adhesion G protein-coupled receptor E5
ENSMUSG00000020248.18	chr10	82748701	82764144	-	Nfyb	-0.999043292	1.23E-07	2.35E-06	2279	1970	2047	1086	1201	1082	5.289098475	5.249188483	5.339549761	4.312099568	4.403561739	4.168287269	Nfyb	ENSMUSG00000020248	18045	nuclear transcription factor-Y beta
ENSMUSG00000073409.12	chr17	35424850	35430055	+	H2-Q6	-1.323135592	1.24E-07	2.36E-06	557	502	520	228	211	235	3.257424776	3.277822235	3.363656378	2.062677464	1.897454659	1.967719209	H2-Q6	ENSMUSG00000073409	110557	histocompatibility 2, Q region locus 6
ENSMUSG00000024381.15	chr18	32377217	32435736	+	Bin1	0.845907893	1.25E-07	2.37E-06	1876	1772	1708	3297	3563	3433	5.008425356	5.096412361	5.078416557	5.913784053	5.972020015	5.833600207	Bin1	ENSMUSG00000024381	30948	bridging integrator 1
ENSMUSG00000025856.15	chr5	138976014	138997370	-	Pdgfa	1.845042734	1.28E-07	2.44E-06	143	134	180	572	588	578	1.299503707	1.376304811	1.835757051	3.387758992	3.373839411	3.264309108	Pdgfa	ENSMUSG00000025856	18590	platelet derived growth factor, alpha
ENSMUSG00000022505.8	chr16	10281749	10313968	-	Emp2	6.154565228	1.29E-07	2.45E-06	2	1	6	218	189	259	-4.543475124	-5.11019505	-2.959658258	1.998116578	1.738994844	2.107726688	Emp2	ENSMUSG00000022505	13731	epithelial membrane protein 2
ENSMUSG00000022246.13	chr15	10568979	10714631	-	Rai14	1.032386917	1.29E-07	2.45E-06	2074	1682	1776	3654	3796	4682	5.153144723	5.021233238	5.134723998	6.062085427	6.063395098	6.281199238	Rai14	ENSMUSG00000022246	75646	retinoic acid induced 14
ENSMUSG00000027469.16	chr2	152847964	152895321	+	Tpx2	-1.741131227	1.30E-07	2.47E-06	16198	13235	12746	4098	3650	5975	8.118169384	7.996967525	7.977715563	6.227507391	6.00681917	6.632979679	Dazl	ENSMUSG00000010592	13164	deleted in azoospermia-like
ENSMUSG00000047735.14	chr6	3372257	3399572	-	Samd9l	-1.319154533	1.31E-07	2.47E-06	2216	1825	1824	694	809	1028	5.248664428	5.138918402	5.17318746	3.666457993	3.833828076	4.094462038	Samd9l	ENSMUSG00000047735	209086	sterile alpha motif domain containing 9-like
ENSMUSG00000042599.8	chr6	39136623	39206789	-	Kdm7a	0.865496612	1.31E-07	2.47E-06	4221	3287	3489	6557	7286	7510	6.178136779	5.987617628	6.108706641	6.905557296	7.003951087	6.9628292	Kdm7a	ENSMUSG00000042599	338523	lysine (K)-specific demethylase 7A
ENSMUSG00000005803.14	chr2	122765237	122809569	+	Sqrdl	-2.497917616	1.31E-07	2.48E-06	284	252	217	58	43	42	2.286881623	2.284982027	2.104773615	0.096991828	-0.384115698	-0.502473105	Sqor	ENSMUSG00000005803	59010	sulfide quinone oxidoreductase
ENSMUSG00000025268.15	chrX	150806370	150814345	-	Maged2	1.900074745	1.31E-07	2.48E-06	178	145	119	522	661	579	1.614377045	1.489717792	1.240768832	3.255914336	3.542538152	3.26680081	Maged2	ENSMUSG00000025268	80884	melanoma antigen, family D, 2
ENSMUSG00000051517.14	chr4	43496142	43499695	-	Arhgef39	-2.29491154	1.31E-07	2.48E-06	403	436	391	104	92	74	2.791021644	3.074680293	2.952770522	0.933986241	0.704322266	0.30730448	Arhgef39	ENSMUSG00000051517	230098	Rho guanine nucleotide exchange factor (GEF) 39
ENSMUSG00000023919.7	chr17	40923051	40935047	-	Cenpq	-1.162398505	1.32E-07	2.48E-06	1932	1715	1595	819	725	969	5.05084948	5.049255859	4.979694918	3.905227248	3.67577261	4.009233047	Cenpq	ENSMUSG00000023919	83815	centromere protein Q
ENSMUSG00000109727.1	chr8	91113762	91116671	-	RP24-225A21.3	-1.108099615	1.34E-07	2.51E-06	2145	1714	1929	843	1020	1006	5.201694966	5.048414638	5.253913353	3.946871367	4.168001273	4.063267416	NA	NA	NA	NA
ENSMUSG00000073678.4	chr1	54472994	54557684	-	Pgap1	-0.987423917	1.34E-07	2.51E-06	1933	1676	1657	821	994	1030	5.05159583	5.016079217	5.034695179	3.908743874	4.130768367	4.097264749	Pgap1	ENSMUSG00000073678	241062	post-GPI attachment to proteins 1
ENSMUSG00000000555.6	chr15	103344289	103366763	-	Itga5	1.392326046	1.37E-07	2.57E-06	2126	1849	1842	5235	4579	6689	5.18886192	5.157762034	5.187350928	6.580738717	6.333915181	6.795818626	Itga5	ENSMUSG00000000555	16402	integrin alpha 5 (fibronectin receptor alpha)
ENSMUSG00000024772.9	chr19	6276725	6300096	+	Ehd1	0.798935325	1.38E-07	2.59E-06	7358	7048	6361	12666	13021	12894	6.979792774	7.087943002	6.975053293	7.855357423	7.841548833	7.742604171	Ehd1	ENSMUSG00000024772	13660	EH-domain containing 1
ENSMUSG00000027313.3	chr2	119351229	119354381	+	Chac1	-2.185113037	1.39E-07	2.60E-06	197	194	184	45	45	44	1.760305624	1.908468794	1.86737903	-0.265578251	-0.319264554	-0.43613061	Chac1	ENSMUSG00000027313	69065	ChaC, cation transport regulator 1
ENSMUSG00000080076.4	chr13	21721457	21721808	-	Hist1h2aj	-2.899710558	1.39E-07	2.61E-06	351	413	298	40	59	52	2.59197766	2.996585968	2.561489146	-0.433522889	0.067758569	-0.197618523	Hist1h2aj	NA	319174	histone cluster 1, H2aj
ENSMUSG00000023262.12	chr9	106432981	106438319	-	Acy1	1.092852397	1.40E-07	2.61E-06	1492	1310	1274	3071	3335	2896	4.678111997	4.660744087	4.655617682	5.811354777	5.876628132	5.588230909	Acy1	ENSMUSG00000023262	109652	aminoacylase 1
ENSMUSG00000026463.17	chr1	133699457	133801041	-	Atp2b4	1.118491455	1.40E-07	2.61E-06	3941	3276	3397	7751	7266	9762	6.07912584	5.982782265	6.07015986	7.146886908	6.99998573	7.341170887	Atp2b4	ENSMUSG00000026463	381290	ATPase, Ca++ transporting, plasma membrane 4
ENSMUSG00000022014.14	chr14	77904239	78002656	+	Epsti1	-1.558398472	1.41E-07	2.62E-06	689	687	736	236	280	250	3.564003522	3.730058352	3.864443739	2.112323482	2.304797766	2.056802752	Epsti1	ENSMUSG00000022014	108670	epithelial stromal interaction 1 (breast)
ENSMUSG00000021477.8	chr13	64363214	64370306	-	Ctsl	0.685334524	1.45E-07	2.70E-06	12553	11053	10962	18716	19388	21336	7.750398814	7.737058088	7.760191246	8.418650163	8.415854378	8.469171877	Ctsl	ENSMUSG00000021477	13039	cathepsin L
ENSMUSG00000022607.14	chr15	73205105	73423191	-	Ptk2	0.75742802	1.46E-07	2.71E-06	2536	2282	2075	3886	4121	4438	5.443220226	5.461241594	5.359145241	6.150882909	6.181894585	6.203992441	Ptk2	ENSMUSG00000022607	14083	PTK2 protein tyrosine kinase 2
ENSMUSG00000004880.11	chr1	181815335	181843046	-	Lbr	-0.954263842	1.47E-07	2.73E-06	5387	4875	4842	2639	3039	2670	6.52999703	6.556176914	6.581438358	5.592676059	5.742559109	5.471030128	Lbr	ENSMUSG00000004880	98386	lamin B receptor
ENSMUSG00000074220.10	chr7	30121942	30134950	+	Zfp382	-1.362391706	1.48E-07	2.74E-06	692	568	638	246	283	259	3.570267042	3.455858988	3.658444834	2.172070945	2.320145731	2.107726688	Zfp382	ENSMUSG00000074220	233060	zinc finger protein 382
ENSMUSG00000021322.7	chr13	20794119	21024252	+	Aoah	-4.041958725	1.52E-07	2.81E-06	102	74	78	5	5	5	0.81407688	0.524010969	0.634522773	-3.313941273	-3.367627576	-3.452432422	Aoah	ENSMUSG00000021322	27052	acyloxyacyl hydrolase
ENSMUSG00000062157.6	chr4	135686287	135708181	+	Ifnlr1	-4.804818774	1.52E-07	2.81E-06	172	129	142	5	9	3	1.565049332	1.321650737	1.494720133	-3.313941273	-2.579131681	-4.104509119	Ifnlr1	ENSMUSG00000062157	242700	interferon lambda receptor 1
ENSMUSG00000031918.16	chr9	13748410	13806481	+	Mtmr2	0.739150036	1.54E-07	2.84E-06	4493	3861	3604	6659	6993	7649	6.268220667	6.219788105	6.155485458	6.927825256	6.944739745	6.989285695	Mtmr2	ENSMUSG00000031918	77116	myotubularin related protein 2
ENSMUSG00000041607.16	chr18	82475146	82585637	+	Mbp	0.867271197	1.55E-07	2.86E-06	3508	3491	3296	6434	6981	6671	5.911235428	6.074473706	6.02662139	6.87823944	6.942262128	6.791931413	Mbp	ENSMUSG00000041607	17196	myelin basic protein
ENSMUSG00000062007.13	chr8	72189638	72201527	+	Hsh2d	-3.56535046	1.57E-07	2.90E-06	390	343	310	41	41	18	2.743775519	2.729008738	2.618351482	-0.39833346	-0.452019763	-1.702410675	Hsh2d	ENSMUSG00000062007	209488	hematopoietic SH2 domain containing
ENSMUSG00000105238.1	chr13	21721433	21721574	+	Gm44357	-2.873035008	1.57E-07	2.90E-06	340	405	292	40	58	52	2.546107769	2.968400553	2.532194839	-0.433522889	0.043305525	-0.197618523	NA	NA	NA	NA
ENSMUSG00000028066.15	chr3	88394143	88410331	-	Pmf1	-0.846911125	1.58E-07	2.90E-06	3084	3014	2856	1740	1679	1908	5.725417712	5.862545463	5.819934839	4.991913207	4.886756886	4.98635943	Pmf1	ENSMUSG00000028066	67037	polyamine-modulated factor 1
ENSMUSG00000031072.14	chr7	144915100	144931701	+	Oraov1	0.664521468	1.59E-07	2.92E-06	5791	5117	5026	8574	8879	9537	6.63431812	6.626065931	6.635240496	7.29246394	7.289203532	7.307531396	Oraov1	ENSMUSG00000031072	72284	oral cancer overexpressed 1
ENSMUSG00000087132.7	chr19	4439003	4448332	+	A930001C03Rik	-1.744480445	1.60E-07	2.94E-06	421	368	327	123	126	107	2.853985602	2.830363258	2.695253121	1.17499434	1.15593438	0.836328809	A930001C03Rik	ENSMUSG00000087132	319314	RIKEN cDNA A930001C03 gene
ENSMUSG00000050335.16	chr14	47367751	47386160	+	Lgals3	0.854519747	1.61E-07	2.94E-06	13353	12855	11622	23203	25808	24107	7.839527087	7.954940552	7.84453483	8.728681925	8.828499479	8.645330387	Lgals3	ENSMUSG00000050335	16854	lectin, galactose binding, soluble 3
ENSMUSG00000017344.4	chr11	78499091	78502324	+	Vtn	5.055412058	1.61E-07	2.95E-06	1	3	1	70	61	81	-5.280440719	-3.887802629	-5.075135475	0.366178461	0.115455311	0.436864113	Vtn	ENSMUSG00000017344	22370	vitronectin
ENSMUSG00000025786.15	chr9	123066160	123113205	-	Zdhhc3	0.730886307	1.62E-07	2.95E-06	6245	5631	5389	9514	9869	11295	6.743198141	6.764145982	6.735837745	7.442539236	7.441702088	7.551596472	Zdhhc3	ENSMUSG00000025786	69035	zinc finger, DHHC domain containing 3
ENSMUSG00000025894.11	chr9	4294793	4309471	-	Aasdhppt	1.05356479	1.62E-07	2.95E-06	1923	1576	1532	3270	3588	4339	5.044114895	4.927351904	4.921573383	5.901922608	5.982106011	6.171449068	Aasdhppt	ENSMUSG00000025894	67618	aminoadipate-semialdehyde dehydrogenase-phosphopantetheinyl transferase
ENSMUSG00000030539.13	chr7	80186841	80226527	+	Sema4b	0.843414834	1.62E-07	2.95E-06	1053	1009	944	1887	1871	2007	4.17557138	4.284267644	4.223309011	5.108888038	5.042920139	5.059320232	Sema4b	ENSMUSG00000030539	20352	sema domain, immunoglobulin domain (Ig), transmembrane domain (TM) and short cytoplasmic domain, (semaphorin) 4B
ENSMUSG00000061411.12	chr2	153407462	153529971	-	Nol4l	1.152540242	1.62E-07	2.95E-06	905	773	810	2026	1737	2167	3.957167612	3.90009993	4.0025704	5.211401569	4.935738068	5.169952237	Nol4l	ENSMUSG00000061411	329540	nucleolar protein 4-like
ENSMUSG00000075394.4	chr15	103018934	103036852	+	Hoxc4	-6.370124187	1.62E-07	2.95E-06	337	299	300	1	3	12	2.533340473	2.531254642	2.571123205	-5.188410391	-4.019704272	-2.268007851	Hoxc4	ENSMUSG00000075394	15423	homeobox C4
ENSMUSG00000009292.17	chr10	77907722	77970563	-	Trpm2	-1.383325722	1.64E-07	2.99E-06	919	804	818	369	368	309	3.979302545	3.95679106	4.016740631	2.756057663	2.698461615	2.361931558	Trpm2	ENSMUSG00000009292	28240	transient receptor potential cation channel, subfamily M, member 2
ENSMUSG00000031608.13	chr8	57523828	57653032	-	Galnt7	0.775370221	1.65E-07	2.99E-06	6937	5877	5697	10210	11729	11908	6.894796932	6.825829367	6.816015328	7.544393004	7.690794701	7.627840041	Galnt7	ENSMUSG00000031608	108150	polypeptide N-acetylgalactosaminyltransferase 7
ENSMUSG00000032096.15	chr9	44741564	44767845	-	Arcn1	0.768254585	1.65E-07	3.00E-06	12648	10852	10114	18732	20072	22331	7.761275464	7.710582251	7.644039407	8.41988294	8.465873499	8.534928499	Arcn1	ENSMUSG00000032096	213827	archain 1
ENSMUSG00000093390.1	chr3	88616457	88621061	-	Gm20652	-3.025740111	1.66E-07	3.00E-06	150	140	130	15	24	16	1.368216457	1.439268769	1.367808021	-1.819176581	-1.21234935	-1.867469921	Gm20652	NA	102636610	predicted gene 20652
ENSMUSG00000039585.15	chr9	59750896	59928866	+	Myo9a	0.789654097	1.66E-07	3.00E-06	1766	1533	1457	2713	3025	3044	4.921274815	4.8874549	4.849182192	5.632566302	5.735898675	5.660125557	Myo9a	ENSMUSG00000039585	270163	myosin IXa
ENSMUSG00000063765.11	chr15	81678296	81697287	-	Chadl	-1.390071022	1.66E-07	3.00E-06	600	565	469	202	227	235	3.364617216	3.448225663	3.214883372	1.888405206	2.002663541	1.967719209	Chadl	ENSMUSG00000063765	214685	chondroadherin-like
ENSMUSG00000032089.16	chr9	45253837	45269149	-	Il10ra	1.007800446	1.69E-07	3.04E-06	2904	2715	2589	5661	6442	5570	5.638670895	5.711844597	5.678359867	6.693595735	6.826345722	6.531727071	Il10ra	ENSMUSG00000032089	16154	interleukin 10 receptor, alpha
ENSMUSG00000094958.1	chr4	108719649	108781904	+	3110021N24Rik	4.170164319	1.69E-07	3.04E-06	4	5	4	81	88	108	-3.695478218	-3.235725932	-3.490172974	0.575355263	0.640546356	0.849687192	NA	NA	NA	NA
ENSMUSG00000033581.16	chr16	22059009	22163299	-	Igf2bp2	1.829443045	1.72E-07	3.09E-06	79	70	78	284	268	314	0.447479736	0.444393801	0.634522773	2.378911951	2.241719084	2.385052166	Igf2bp2	ENSMUSG00000033581	319765	insulin-like growth factor 2 mRNA binding protein 2
ENSMUSG00000026049.11	chr1	44086613	44102441	-	Tex30	-1.131262615	1.74E-07	3.12E-06	717	602	588	284	316	329	3.621431802	3.53965988	3.540800629	2.378911951	2.479002495	2.452270614	Tex30	ENSMUSG00000026049	75623	testis expressed 30
ENSMUSG00000029338.13	chr5	97882783	98031043	-	Antxr2	0.782676287	1.73E-07	3.12E-06	4184	3630	3469	6209	7180	7369	6.165436313	6.130794986	6.100414076	6.826888498	6.982809397	6.935486984	Antxr2	ENSMUSG00000029338	71914	anthrax toxin receptor 2
ENSMUSG00000032491.14	chr9	110621135	110624452	-	Nradd	0.922676396	1.74E-07	3.12E-06	1292	1345	1262	2538	2569	2792	4.470545346	4.698769125	4.641969697	5.536387653	5.500212742	5.535477525	Nradd	ENSMUSG00000032491	67169	neurotrophin receptor associated death domain
ENSMUSG00000013419.6	chr9	121760033	121771742	+	Zfp651	0.975454816	1.74E-07	3.12E-06	739	761	706	1484	1495	1657	3.665003118	3.877542675	3.804447775	4.762388487	4.719353001	4.782929114	Zfp651	ENSMUSG00000013419	270210	zinc finger protein 651
ENSMUSG00000044229.8	chr9	48362041	48400025	+	Nxpe4	1.997224736	1.75E-07	3.12E-06	81	91	109	380	383	424	0.483324935	0.820542287	1.114689084	2.798379752	2.756023573	2.817756703	Nxpe4	ENSMUSG00000044229	244853	neurexophilin and PC-esterase domain family, member 4
ENSMUSG00000033565.16	chr15	77078990	77307053	-	Rbfox2	1.035001491	1.77E-07	3.17E-06	455	445	442	940	951	1049	2.965904024	3.10412407	3.129435669	4.103911242	4.067000652	4.12362241	Rbfox2	ENSMUSG00000033565	93686	RNA binding protein, fox-1 homolog (C. elegans) 2
ENSMUSG00000110397.1	chr8	56311304	56314909	+	RP23-466C10.2	-6.3947562	1.78E-07	3.18E-06	70	37	68	0	0	1	0.274148133	-0.466338861	0.437934107	-6.773372891	-6.827059194	-5.32690154	NA	NA	NA	NA
ENSMUSG00000036138.16	chr9	119339676	119350299	+	Acaa1a	1.261413172	1.79E-07	3.20E-06	2160	2289	2011	5326	6153	5107	5.211746296	5.465659299	5.313958047	6.605599254	6.760132313	6.406537543	Acaa1a	ENSMUSG00000036138	113868	acetyl-Coenzyme A acyltransferase 1A
ENSMUSG00000014599.10	chr3	107741048	107760469	-	Csf1	-2.284244429	1.80E-07	3.21E-06	318	258	327	55	65	77	2.449746343	2.318862919	2.695253121	0.021042975	0.206363807	0.364260364	Csf1	ENSMUSG00000014599	12977	colony stimulating factor 1 (macrophage)
ENSMUSG00000028037.13	chr3	151730922	151749960	-	Ifi44	-2.159682348	1.83E-07	3.26E-06	2274	1937	1893	424	363	730	5.2859305	5.224823044	5.22674173	2.956247852	2.67875236	3.600876422	Ifi44	ENSMUSG00000028037	99899	interferon-induced protein 44
ENSMUSG00000039981.5	chr10	7832470	7870397	+	Zc3h12d	-1.401928132	1.84E-07	3.27E-06	765	621	708	242	278	328	3.714855348	3.58445303	3.808526067	2.148468046	2.294474323	2.447885519	Zc3h12d	ENSMUSG00000039981	237256	zinc finger CCCH type containing 12D
ENSMUSG00000067931.5	chr17	21567046	21588697	+	Zfp948	-1.62948359	1.84E-07	3.27E-06	632	537	546	192	233	172	3.43951845	3.374963393	3.43397971	1.815341744	2.040219545	1.518588511	Zfp948	ENSMUSG00000067931	381066	zinc finger protein 948
ENSMUSG00000060166.5	chr16	18220754	18235136	-	Zdhhc8	1.07391691	1.85E-07	3.28E-06	494	476	481	1079	1016	1173	3.084423491	3.201174853	3.251294012	4.302774637	4.162335306	4.284738086	Zdhhc8	ENSMUSG00000060166	27801	zinc finger, DHHC domain containing 8
ENSMUSG00000004642.13	chr5	33634952	33652574	-	Slbp	-1.012346605	1.86E-07	3.30E-06	3802	3454	3261	1738	2075	1773	6.027329313	6.059103645	6.011221937	4.99025446	5.192184022	4.880519574	Slbp	ENSMUSG00000004642	20492	stem-loop binding protein
ENSMUSG00000032481.16	chr9	110117708	110240178	+	Smarcc1	0.738749222	1.87E-07	3.31E-06	6616	5753	5857	10681	10183	11659	6.826449327	6.795066585	6.855971358	7.609453747	7.486886676	7.597354261	Smarcc1	ENSMUSG00000032481	20588	SWI/SNF related, matrix associated, actin dependent regulator of chromatin, subfamily c, member 1
ENSMUSG00000054589.1	chr18	62180126	62184405	+	Gm9949	-1.434179915	1.87E-07	3.31E-06	439	372	339	142	150	161	2.914316136	2.845939064	2.747169789	1.381445218	1.406560482	1.423526314	Gm9949	ENSMUSG00000054589	225609	predicted gene 9949
ENSMUSG00000037466.13	chr12	113156421	113166048	+	4930427A07Rik	-2.64686639	1.89E-07	3.34E-06	531	522	513	122	93	63	3.188522662	3.334129676	3.344122491	1.163265048	0.719835266	0.076820646	Tedc1	ENSMUSG00000037466	104732	tubulin epsilon and delta complex 1
ENSMUSG00000021003.9	chr12	98202304	98259459	-	Galc	-1.529927653	1.90E-07	3.36E-06	492	405	431	180	154	158	3.078576695	2.968400553	3.093118773	1.722482135	1.444403834	1.396474989	Galc	ENSMUSG00000021003	14420	galactosylceramidase
ENSMUSG00000026222.16	chr1	85649988	85709998	+	Sp100	-0.965454524	1.91E-07	3.36E-06	3074	2433	2386	1280	1516	1513	5.720732872	5.553659508	5.560582645	4.549118646	4.739470588	4.651808919	Sp100	ENSMUSG00000026222	20684	nuclear antigen Sp100
ENSMUSG00000026930.15	chr2	26315515	26348237	+	Gpsm1	-1.344667192	1.91E-07	3.36E-06	705	663	672	238	306	318	3.597099053	3.678795104	3.733292482	2.124472565	2.432684069	2.403285521	Gpsm1	ENSMUSG00000026930	67839	G-protein signalling modulator 1 (AGS3-like, C. elegans)
ENSMUSG00000034868.8	chr17	70973920	70990787	-	Myl12b	-0.773441091	1.92E-07	3.38E-06	12512	12492	11813	7215	7714	8130	7.745679229	7.913617047	7.868050861	7.043510763	7.086297745	7.07726432	Myl12b	ENSMUSG00000034868	67938	myosin, light chain 12B, regulatory
ENSMUSG00000067455.5	chr13	21735064	21735837	+	Hist1h4j	-3.019362451	1.93E-07	3.39E-06	464	562	452	61	89	49	2.994131567	3.440551735	3.161676006	0.169141614	0.656756583	-0.282507421	Hist1h4j	ENSMUSG00000067455	319159	histone cluster 1, H4j
ENSMUSG00000022329.14	chr15	34875496	35155806	-	Stk3	0.885321465	1.96E-07	3.43E-06	2027	1654	1632	3204	3345	3946	5.12008298	4.997022025	5.012769301	5.872510663	5.880946935	6.034493993	Stk3	ENSMUSG00000022329	56274	serine/threonine kinase 3
ENSMUSG00000051705.12	chr9	59734259	59750649	-	Senp8	1.110455178	1.98E-07	3.47E-06	493	426	406	905	1007	1154	3.081503055	3.04124438	3.007013566	4.04919794	4.149504929	4.261188417	Senp8	ENSMUSG00000051705	71599	SUMO/sentrin specific peptidase 8
ENSMUSG00000070425.12	chr7	102065713	102096864	+	Xntrpc	-1.012539477	1.98E-07	3.47E-06	860	750	757	412	421	420	3.883628163	3.85655071	3.905004103	2.914877418	2.892329627	2.804097949	Xntrpc	ENSMUSG00000070425	102443351	Xndc1-transient receptor potential cation channel, subfamily C, member 2 readthrough
ENSMUSG00000022965.7	chr16	91547072	91565169	+	Ifngr2	0.685495189	1.99E-07	3.47E-06	4468	3959	3776	6896	6836	7217	6.26017169	6.255944994	6.222736096	6.978275768	6.911983005	6.905419446	Ifngr2	ENSMUSG00000022965	15980	interferon gamma receptor 2
ENSMUSG00000027905.15	chr3	105678270	105687574	-	Ddx20	-0.688763327	1.99E-07	3.47E-06	3718	3273	3181	2125	2224	2393	5.995101838	5.981460712	5.975393431	5.280213652	5.292206189	5.31304205	Ddx20	ENSMUSG00000027905	53975	DEAD (Asp-Glu-Ala-Asp) box polypeptide 20
ENSMUSG00000032113.15	chr9	36708482	36727065	-	Chek1	-1.021934809	2.01E-07	3.50E-06	1132	981	1013	483	553	612	4.279892116	4.243686906	4.325032398	3.143999188	3.285380312	3.346701993	Chek1	ENSMUSG00000032113	12649	checkpoint kinase 1
ENSMUSG00000017493.12	chr11	99041244	99054392	+	Igfbp4	0.871427364	2.03E-07	3.53E-06	1422	1464	1335	2671	2682	2899	4.608809718	4.821034927	4.723066285	5.61006141	5.562303261	5.589724382	Igfbp4	ENSMUSG00000017493	16010	insulin-like growth factor binding protein 4
ENSMUSG00000032815.16	chr8	123268300	123318576	-	Fanca	-0.921157926	2.03E-07	3.53E-06	2270	2109	1874	1112	1250	1165	5.283391102	5.347527821	5.212192135	4.346216729	4.461230148	4.274869248	Fanca	ENSMUSG00000032815	14087	Fanconi anemia, complementation group A
ENSMUSG00000096001.2	chr14	37102140	37114022	-	2610528A11Rik	-1.925140815	2.04E-07	3.54E-06	214	199	184	56	52	59	1.879430618	1.945087385	1.86737903	0.046806071	-0.112813677	-0.017046278	2610528A11Rik	ENSMUSG00000096001	70045	RIKEN cDNA 2610528A11 gene
ENSMUSG00000012483.4	chr6	8255936	8259173	-	Rpa3	-1.051152818	2.05E-07	3.55E-06	890	854	861	427	457	459	3.933068582	4.043779131	4.09060901	2.966407718	3.010568739	2.93205701	Rpa3	ENSMUSG00000012483	68240	replication protein A3
ENSMUSG00000052631.14	chr6	72513644	72521634	-	Sh2d6	-1.77256127	2.05E-07	3.55E-06	317	285	323	95	99	94	2.445209562	2.462189384	2.677523926	0.804055937	0.809565426	0.650378383	Sh2d6	ENSMUSG00000052631	71130	SH2 domain containing 6
ENSMUSG00000021733.9	chr14	14703025	14799943	+	Slc4a7	0.825208535	2.06E-07	3.56E-06	3319	2922	2932	5108	5887	6436	5.831347017	5.817829758	5.857817417	6.545311131	6.696380245	6.740196646	Slc4a7	ENSMUSG00000021733	218756	solute carrier family 4, sodium bicarbonate cotransporter, member 7
ENSMUSG00000032518.5	chr9	120127766	120132369	+	Rpsa	0.771550828	2.06E-07	3.56E-06	124957	117961	106153	210259	204554	221520	11.06567475	11.152799	11.03569444	11.90843857	11.81506656	11.84521665	Rpsa	ENSMUSG00000032518	16785	ribosomal protein SA
ENSMUSG00000024769.7	chr19	6306456	6325652	+	Cdc42bpg	-0.845984444	2.08E-07	3.58E-06	5534	4782	5183	3106	2876	3236	6.568834052	6.528391702	6.679612872	5.827701448	5.663039561	5.748354748	Cdc42bpg	ENSMUSG00000024769	240505	CDC42 binding protein kinase gamma (DMPK-like)
ENSMUSG00000037573.5	chr11	94211454	94215495	+	Tob1	-0.882216915	2.08E-07	3.58E-06	2107	1793	1965	1122	1104	1171	5.175913697	5.113404479	5.280582673	4.359126838	4.282118509	4.282277198	Tob1	ENSMUSG00000037573	22057	transducer of ErbB-2.1
ENSMUSG00000048163.13	chr5	113818536	113832644	-	Selplg	-0.930483421	2.08E-07	3.58E-06	2392	1926	1966	1140	1079	1302	5.35889999	5.21660892	5.281316495	4.38207784	4.249088334	4.435203616	Selplg	ENSMUSG00000048163	20345	selectin, platelet (p-selectin) ligand
ENSMUSG00000060678.4	chr13	23698060	23698454	-	Hist1h4c	-1.699112966	2.08E-07	3.58E-06	757	736	700	186	296	250	3.699698859	3.829384164	3.792143265	1.769658929	2.3848291	2.056802752	Hist1h4c	ENSMUSG00000060678	319155	histone cluster 1, H4c
ENSMUSG00000051439.6	chr18	36725074	36726736	-	Cd14	1.283617358	2.08E-07	3.58E-06	30533	28388	25880	70370	61999	90870	9.032702133	9.09786145	8.999479894	10.32931025	10.09290977	10.55966036	Cd14	ENSMUSG00000051439	12475	CD14 antigen
ENSMUSG00000046295.13	chr8	71406010	71409904	+	Ankle1	-2.862573054	2.09E-07	3.59E-06	257	222	209	29	49	26	2.143025403	2.102503975	2.050708458	-0.890729842	-0.197702574	-1.183943586	Ankle1	ENSMUSG00000046295	234396	ankyrin repeat and LEM domain containing 1
ENSMUSG00000034488.14	chr13	88821472	89323223	+	Edil3	2.79572469	2.09E-07	3.59E-06	25	24	15	146	157	173	-1.192977877	-1.080447707	-1.705901665	1.421383963	1.472148824	1.526927812	Edil3	ENSMUSG00000034488	13612	EGF-like repeats and discoidin I-like domains 3
ENSMUSG00000031015.8	chr7	110221711	110283506	+	Swap70	0.729485775	2.10E-07	3.60E-06	6018	5634	5112	9496	10145	10039	6.689785032	6.764914326	6.659715247	7.43980729	7.481493152	7.381535759	Swap70	ENSMUSG00000031015	20947	SWA-70 protein
ENSMUSG00000020228.11	chr10	120083608	120112987	-	Helb	-0.789786649	2.12E-07	3.62E-06	2632	2369	2315	1425	1581	1518	5.496814597	5.515209395	5.517010066	4.703879433	4.800018646	4.656567152	Helb	ENSMUSG00000020228	117599	helicase (DNA) B
ENSMUSG00000021806.3	chr14	19751257	19811787	+	Nid2	-1.419424593	2.12E-07	3.62E-06	698	664	619	243	230	324	3.582713086	3.680967838	3.614862496	2.154405071	2.021563746	2.430210627	Nid2	ENSMUSG00000021806	18074	nidogen 2
ENSMUSG00000052713.8	chr18	54888045	54990180	-	Zfp608	-1.036840644	2.12E-07	3.62E-06	1505	1224	1286	671	633	789	4.690623773	4.562819507	4.669137766	3.617870698	3.480141615	3.712931415	Zfp608	ENSMUSG00000052713	269023	zinc finger protein 608
ENSMUSG00000055116.8	chr7	113207465	113314126	+	Arntl	0.82632104	2.14E-07	3.65E-06	1831	1472	1485	2921	2862	3276	4.973406766	4.828894368	4.876634914	5.739120683	5.656000784	5.766075776	Arntl	ENSMUSG00000055116	11865	aryl hydrocarbon receptor nuclear translocator-like
ENSMUSG00000004849.14	chr5	137034993	137046135	-	Ap1s1	0.798063214	2.16E-07	3.68E-06	4018	3769	3431	7093	6588	7156	6.107038147	6.184999905	6.084525664	7.018909036	6.858675135	6.893174431	Ap1s1	ENSMUSG00000004849	11769	adaptor protein complex AP-1, sigma 1
ENSMUSG00000004837.2	chr11	61653265	61672784	+	Grap	-0.885763652	2.18E-07	3.71E-06	2730	2395	2340	1352	1558	1411	5.549546222	5.530953547	5.532503074	4.628039987	4.778883245	4.551149373	Grap	ENSMUSG00000004837	71520	GRB2-related adaptor protein
ENSMUSG00000029528.18	chr5	115506676	115555987	+	Pxn	0.704427738	2.22E-07	3.77E-06	12564	11766	11185	20537	19897	21431	7.751662421	7.827240076	7.789244151	8.552600063	8.453240362	8.475581167	Pxn	ENSMUSG00000029528	19303	paxillin
ENSMUSG00000035958.2	chr13	24831679	24842153	+	Tdp2	-0.871623057	2.22E-07	3.77E-06	1823	1600	1569	862	1000	1058	4.967091265	4.94914941	4.955991338	3.979007755	4.139446258	4.135941513	Tdp2	ENSMUSG00000035958	56196	tyrosyl-DNA phosphodiesterase 2
ENSMUSG00000073176.4	chrX	56346400	56365674	+	Zfp449	-6.526669366	2.22E-07	3.77E-06	99	57	68	0	0	2	0.771221401	0.1503325	0.437934107	-6.773372891	-6.827059194	-4.589935946	Zfp449	ENSMUSG00000073176	78619	zinc finger protein 449
ENSMUSG00000022805.16	chr16	38297754	38342143	-	Maats1	-3.882458209	2.22E-07	3.77E-06	144	130	164	11	7	13	1.309522463	1.332748445	1.701845798	-2.249810935	-2.920168599	-2.156976539	Maats1	ENSMUSG00000022805	320214	MYCBP-associated, testis expressed 1
ENSMUSG00000097471.8	chr7	135635931	135652314	-	5830432E09Rik	1.409458573	2.24E-07	3.79E-06	214	172	155	464	538	532	1.879430618	1.735295001	1.620672794	3.086161895	3.24574334	3.144773674	5830432E09Rik	ENSMUSG00000097471	67765	RIKEN cDNA 5830432E09 gene
ENSMUSG00000020015.9	chr10	93160876	93241342	+	Cdk17	0.822876705	2.27E-07	3.84E-06	2993	2539	2461	4633	4793	5711	5.682214336	5.615171207	5.605224049	6.404513765	6.399804523	6.567789931	Cdk17	ENSMUSG00000020015	237459	cyclin-dependent kinase 17
ENSMUSG00000043300.2	chr3	69574158	69598960	-	B3galnt1	5.043765171	2.28E-07	3.85E-06	2	3	8	143	146	155	-4.543475124	-3.887802629	-2.572635134	1.391534035	1.36769766	1.368906729	B3galnt1	ENSMUSG00000043300	26879	UDP-GalNAc:betaGlcNAc beta 1,3-galactosaminyltransferase, polypeptide 1
ENSMUSG00000055782.8	chr15	91145884	91191807	-	Abcd2	-6.544499303	2.28E-07	3.85E-06	140	124	128	0	4	1	1.269023101	1.264844381	1.345526573	-6.773372891	-3.657134193	-5.32690154	Abcd2	ENSMUSG00000055782	26874	ATP-binding cassette, sub-family D (ALD), member 2
ENSMUSG00000025558.16	chr14	121542039	121797837	-	Dock9	1.140165478	2.30E-07	3.86E-06	321	295	306	680	691	805	2.463271708	2.511856769	2.599645288	3.63707846	3.606526247	3.741876738	Dock9	ENSMUSG00000025558	105445	dedicator of cytokinesis 9
ENSMUSG00000069267.2	chr13	23752267	23752886	+	Hist1h3b	-3.663394263	2.30E-07	3.86E-06	478	646	423	34	49	45	3.036971895	3.641349009	3.066120184	-0.664848435	-0.197702574	-0.404069401	Hist1h3b	ENSMUSG00000069267	319150	histone cluster 1, H3b
ENSMUSG00000091383.1	chr13	51202688	51203065	-	Hist1h2al	-1.292593356	2.30E-07	3.86E-06	2162	2546	2077	958	977	1013	5.213081198	5.619142451	5.360534786	4.13126173	4.105893698	4.073266333	Hist1h2al	NA	667728	histone cluster 1, H2al
ENSMUSG00000032030.16	chr9	53614582	53670014	-	Cul5	0.779174653	2.33E-07	3.91E-06	4313	3581	3493	6342	7298	7218	6.209240021	6.111190676	6.110359449	6.857463008	7.00632508	6.905619321	Cul5	ENSMUSG00000032030	75717	cullin 5
ENSMUSG00000027035.10	chr2	68861441	69114282	+	Cers6	0.785904967	2.33E-07	3.91E-06	3708	3206	3305	5728	6085	7071	5.991216834	5.951626141	6.030554824	6.710568814	6.744100894	6.875936514	Cers6	ENSMUSG00000027035	241447	ceramide synthase 6
ENSMUSG00000030047.14	chr6	87458545	87533259	-	Arhgap25	-0.962536963	2.33E-07	3.91E-06	2529	2205	2218	1137	1199	1494	5.439233305	5.411732494	5.455270862	4.378277939	4.401158248	4.633583141	Arhgap25	ENSMUSG00000030047	232201	Rho GTPase activating protein 25
ENSMUSG00000045005.9	chr1	64730558	64737751	-	Fzd5	-1.437226193	2.33E-07	3.91E-06	782	605	636	296	247	256	3.746543723	3.546825599	3.653918728	2.438515403	2.124225521	2.090950975	Fzd5	ENSMUSG00000045005	14367	frizzled class receptor 5
ENSMUSG00000046223.10	chr7	24462484	24475968	+	Plaur	1.062906723	2.35E-07	3.92E-06	7848	6407	6435	15034	13371	17970	7.072798019	6.950388307	6.991738551	8.102616377	7.8798145	8.221478889	Plaur	ENSMUSG00000046223	18793	plasminogen activator, urokinase receptor
ENSMUSG00000070392.4	chr3	96245554	96248509	+	Gm20634	-1.537529487	2.35E-07	3.92E-06	743	773	743	301	286	248	3.672785713	3.90009993	3.878090956	2.4626413	2.335332134	2.045238001	NA	NA	NA	NA
ENSMUSG00000108126.1	chr6	145863297	145865172	+	Gm43909	-5.801558093	2.35E-07	3.92E-06	79	60	54	1	0	2	0.447479736	0.223705686	0.108086349	-5.188410391	-6.827059194	-4.589935946	NA	NA	NA	NA
ENSMUSG00000040612.13	chr1	166254139	166316823	+	Ildr2	4.003456923	2.36E-07	3.94E-06	82	90	77	1243	1126	2049	0.500918995	0.804688336	0.61602643	4.506817901	4.310572404	5.089192234	Ildr2	ENSMUSG00000040612	100039795	immunoglobulin-like domain containing receptor 2
ENSMUSG00000000594.7	chr11	55098115	55113029	+	Gm2a	0.76858805	2.37E-07	3.95E-06	2258	2058	2012	3773	3587	4179	5.275745979	5.312220182	5.314675092	6.108314667	5.981703922	6.117250605	Gm2a	ENSMUSG00000000594	14667	GM2 ganglioside activator protein
ENSMUSG00000007891.16	chr7	142375911	142388038	-	Ctsd	0.92158602	2.37E-07	3.95E-06	54536	50215	47863	98775	92607	119267	9.869531275	9.920687577	9.886540301	10.81849273	10.67178222	10.9519774	Ctsd	ENSMUSG00000007891	13033	cathepsin D
ENSMUSG00000027883.15	chr3	108678638	108722309	-	Gpsm2	-1.031929596	2.38E-07	3.95E-06	2592	2350	2267	1092	1419	1274	5.474725054	5.503594414	5.48678886	4.320044673	4.644107939	4.403851617	Gpsm2	ENSMUSG00000027883	76123	G-protein signalling modulator 2 (AGS3-like, C. elegans)
ENSMUSG00000033961.16	chr7	12977848	12985714	+	Zfp446	1.367878473	2.40E-07	3.98E-06	308	270	305	707	796	942	2.40372346	2.384327233	2.594930594	3.693213446	3.810471357	3.968484767	Zfp446	ENSMUSG00000033961	269870	zinc finger protein 446
ENSMUSG00000040875.12	chr9	114978569	115232225	+	Osbpl10	2.775366023	2.40E-07	3.98E-06	28	28	18	172	198	174	-1.032513205	-0.862267537	-1.45064461	1.65707966	1.805936003	1.535219185	Osbpl10	ENSMUSG00000040875	74486	oxysterol binding protein-like 10
ENSMUSG00000008398.14	chr10	93247414	93311135	-	Elk3	1.202328162	2.41E-07	3.98E-06	6135	5223	5484	13468	11689	16651	6.717561984	6.65564354	6.761046411	7.943928674	7.685866407	8.111500483	Elk3	ENSMUSG00000008398	13713	ELK3, member of ETS oncogene family
ENSMUSG00000037280.12	chr15	100691813	100729376	-	Galnt6	-0.910432199	2.42E-07	4.01E-06	1762	1619	1458	895	954	900	4.918004323	4.966175202	4.850171695	4.033176731	4.071542193	3.902718425	Galnt6	ENSMUSG00000037280	207839	polypeptide N-acetylgalactosaminyltransferase 6
ENSMUSG00000030654.9	chr7	118118891	118129662	-	Arl6ip1	-1.050238749	2.43E-07	4.01E-06	7761	7146	6762	3498	4227	3498	7.056716562	7.107863588	7.063242998	5.999147885	6.218529845	5.860656735	Arl6ip1	ENSMUSG00000030654	54208	ADP-ribosylation factor-like 6 interacting protein 1
ENSMUSG00000007987.12	chr5	136908150	136915404	+	Ift22	1.022079995	2.44E-07	4.03E-06	1005	854	864	1738	1910	2288	4.108294147	4.043779131	4.095624178	4.99025446	5.072675348	5.248322536	Ift22	ENSMUSG00000007987	67286	intraflagellar transport 22
ENSMUSG00000030041.9	chr6	82946902	83030309	+	M1ap	-1.355582241	2.46E-07	4.05E-06	485	447	453	180	212	187	3.057924266	3.110586321	3.164860765	1.722482135	1.904259837	1.638882745	M1ap	ENSMUSG00000030041	110958	meiosis 1 associated protein
ENSMUSG00000031400.10	chrX	74409483	74429194	-	G6pdx	0.8001225	2.46E-07	4.05E-06	15744	14108	13340	25316	24859	30429	8.077157103	8.089119439	8.043427143	8.854417454	8.774450465	8.981318967	G6pdx	ENSMUSG00000031400	14381	glucose-6-phosphate dehydrogenase X-linked
ENSMUSG00000098055.1	chr10	60931991	60940942	+	Gm26947	-1.04461812	2.47E-07	4.07E-06	852	743	726	362	428	413	3.870152805	3.843031381	3.844721012	2.728464293	2.9160922	2.779879478	Gm26947	NA	102640832	predicted gene, 26947
ENSMUSG00000034883.8	chr12	69168814	69179010	+	Lrr1	-2.644853316	2.52E-07	4.14E-06	186	168	161	20	32	37	1.677628601	1.70144723	1.675292379	-1.415820887	-0.804691381	-0.68304535	Lrr1	ENSMUSG00000034883	69706	leucine rich repeat protein 1
ENSMUSG00000097081.1	chr12	111426874	111430946	-	Gm10425	1.447786913	2.53E-07	4.15E-06	149	150	144	442	422	430	1.358598455	1.538462126	1.514827707	3.016160754	2.895748337	2.838005387	Gm10425	NA	100038720	predicted gene 10425
ENSMUSG00000032078.16	chr9	46273064	46282643	+	Zpr1	1.100166193	2.54E-07	4.16E-06	2857	2759	2431	5867	6872	5733	5.615134564	5.735033619	5.587532901	6.74515733	6.919560092	6.573336341	Zpr1	ENSMUSG00000032078	22687	ZPR1 zinc finger
ENSMUSG00000004936.8	chr9	64185770	64253631	-	Map2k1	0.851878401	2.54E-07	4.17E-06	3000	2587	2523	4942	5616	5083	5.685583995	5.642185596	5.641112396	6.497652359	6.628396465	6.399742381	Map2k1	ENSMUSG00000004936	26395	mitogen-activated protein kinase kinase 1
ENSMUSG00000024151.13	chr17	87672330	87723713	+	Msh2	-0.911378583	2.58E-07	4.22E-06	2415	2123	2061	1114	1369	1274	5.372702918	5.357070842	5.34938077	4.34880801	4.592374356	4.403851617	Msh2	ENSMUSG00000024151	17685	mutS homolog 2
ENSMUSG00000038400.15	chr2	173224458	173276533	-	Pmepa1	1.333089021	2.58E-07	4.22E-06	755	662	733	1876	1661	2292	3.695884726	3.676619093	3.85855518	5.100455683	4.871211383	5.250841978	Pmepa1	ENSMUSG00000038400	65112	prostate transmembrane protein, androgen induced 1
ENSMUSG00000078485.2	chr4	156221456	156228542	-	Plekhn1	0.765650906	2.59E-07	4.24E-06	2265	2125	2036	3936	3712	4033	5.280210556	5.358428993	5.331778123	6.169324871	6.031116116	6.0659525	Plekhn1	ENSMUSG00000078485	231002	pleckstrin homology domain containing, family N member 1
ENSMUSG00000028587.18	chr4	108579423	108614833	+	Orc1	-1.188392633	2.60E-07	4.24E-06	1139	1108	974	478	446	592	4.28878199	4.419235504	4.2684204	3.129002223	2.975457171	3.298807303	Orc1	ENSMUSG00000028587	18392	origin recognition complex, subunit 1
ENSMUSG00000024691.13	chr19	12545740	12589768	+	Fam111a	-0.946128191	2.61E-07	4.26E-06	17090	14471	14448	7779	7806	10069	8.195503765	8.125769296	8.158534128	7.152088827	7.10340096	7.385840387	Fam111a	ENSMUSG00000024691	107373	family with sequence similarity 111, member A
ENSMUSG00000036964.14	chr11	58954685	58973098	+	Trim17	-1.585736559	2.64E-07	4.29E-06	907	1007	789	328	341	292	3.960350614	4.281406572	3.96469748	2.586376669	2.588682574	2.280428774	Trim17	ENSMUSG00000036964	56631	tripartite motif-containing 17
ENSMUSG00000031993.6	chr9	30427329	30466726	+	Snx19	0.739364747	2.64E-07	4.30E-06	3461	3146	2863	5420	5326	6153	5.891778414	5.924374676	5.823465912	6.630837329	6.551912951	6.675327467	Snx19	ENSMUSG00000031993	102607	sorting nexin 19
ENSMUSG00000040592.11	chr11	106311341	106314762	-	Cd79b	-3.164843399	2.66E-07	4.31E-06	121	92	85	11	11	12	1.059409284	0.836223909	0.757754539	-2.249810935	-2.303497238	-2.268007851	Cd79b	ENSMUSG00000040592	15985	CD79B antigen
ENSMUSG00000099757.1	chr19	11470166	11484578	-	BE692007	-2.884355363	2.66E-07	4.31E-06	312	327	347	35	40	72	2.42230916	2.660193545	2.780771192	-0.623625772	-0.487209191	0.268045049	BE692007	NA	100504727	expressed sequence BE692007
ENSMUSG00000032604.16	chr9	108507706	108515941	+	Qars	0.909325298	2.67E-07	4.34E-06	10642	8902	8788	17691	17281	22087	7.51214625	7.424837264	7.44130326	8.337395862	8.249881631	8.519078473	Qars	ENSMUSG00000032604	97541	glutaminyl-tRNA synthetase
ENSMUSG00000037992.16	chr11	98927818	98974942	+	Rara	0.968446456	2.71E-07	4.38E-06	1584	1390	1500	3174	2809	3393	4.764408725	4.746230478	4.891129628	5.858940771	5.629038491	5.816694257	Rara	ENSMUSG00000037992	19401	retinoic acid receptor, alpha
ENSMUSG00000039126.9	chr19	16956118	17223932	+	Prune2	-0.925375622	2.71E-07	4.38E-06	1844	1579	1653	882	891	1090	4.983610854	4.930094671	5.031209354	4.012079577	3.973031793	4.178910014	Prune2	ENSMUSG00000039126	353211	prune homolog 2
ENSMUSG00000044702.13	chr7	122107262	122132985	-	Palb2	-0.996788855	2.72E-07	4.40E-06	1660	1273	1372	730	726	843	4.831998788	4.619425693	4.762492458	3.739367571	3.677759793	3.808380217	Palb2	ENSMUSG00000044702	233826	partner and localizer of BRCA2
ENSMUSG00000027330.16	chr2	131186949	131198497	+	Cdc25b	-0.971799782	2.74E-07	4.42E-06	1577	1547	1613	814	855	912	4.758021071	4.900566143	4.995879887	3.896397997	3.91356485	3.921816708	Cdc25b	ENSMUSG00000027330	12531	cell division cycle 25B
ENSMUSG00000028207.18	chr4	9448069	9669344	-	Asph	0.745836759	2.74E-07	4.42E-06	3586	3176	3282	5549	6306	6164	5.942957696	5.938064753	6.02048132	6.664769186	6.795564646	6.677904127	Asph	ENSMUSG00000028207	65973	aspartate-beta-hydroxylase
ENSMUSG00000031996.16	chr9	31149557	31211815	-	Aplp2	0.703207279	2.75E-07	4.42E-06	5596	4726	5038	8681	8858	9154	6.584905926	6.511398989	6.638680605	7.310355728	7.28578752	7.248401335	Aplp2	ENSMUSG00000031996	11804	amyloid beta (A4) precursor-like protein 2
ENSMUSG00000077563.1	chr8	70895759	70895889	-	Snora68	-1.516701994	2.76E-07	4.44E-06	558	539	419	176	180	207	3.260010251	3.380321598	3.052429025	1.690151482	1.668795833	1.785103485	Snora68	NA	104370	small nucleolar RNA, H/ACA box 68
ENSMUSG00000072115.10	chr14	51091077	51102007	+	Ang	-2.901096954	2.77E-07	4.46E-06	175	142	147	24	15	28	1.589924001	1.459660558	1.544473169	-1.158663047	-1.872862884	-1.078974027	Ang	ENSMUSG00000072115	11727	angiogenin, ribonuclease, RNase A family, 5
ENSMUSG00000032279.10	chr9	54586511	54604661	+	Idh3a	0.701580923	2.78E-07	4.46E-06	4337	3675	3494	6333	6423	7214	6.217244823	6.148567255	6.110772356	6.855414371	6.822084689	6.904819656	Idh3a	ENSMUSG00000032279	67834	isocitrate dehydrogenase 3 (NAD+) alpha
ENSMUSG00000037991.9	chr16	10835059	10892966	+	Rmi2	-3.285264293	2.80E-07	4.50E-06	206	135	172	22	16	17	1.824594752	1.38699149	1.770354576	-1.281519795	-1.782665075	-1.782581024	Rmi2	ENSMUSG00000037991	223970	RecQ mediated genome instability 2
ENSMUSG00000032679.12	chr2	104095801	104115354	+	Cd59a	2.399610977	2.82E-07	4.52E-06	37	34	43	183	219	246	-0.636584529	-0.586633094	-0.21715448	1.746263361	1.951017935	2.033579796	Cd59a	ENSMUSG00000032679	12509	CD59a antigen
ENSMUSG00000087568.1	chr16	38302616	38305020	+	Maats1os	-4.199671196	2.82E-07	4.52E-06	141	129	158	7	5	13	1.279255024	1.321650737	1.648241054	-2.866482296	-3.367627576	-2.156976539	NA	NA	NA	NA
ENSMUSG00000036249.16	chr2	51924448	51935163	-	Rbm43	-0.780662271	2.84E-07	4.54E-06	1842	1602	1613	963	1054	1130	4.982045685	4.95095109	4.995879887	4.138767965	4.215284185	4.230881236	Rbm43	ENSMUSG00000036249	71684	RNA binding motif protein 43
ENSMUSG00000022126.6	chr14	103046977	103056573	+	Acod1	-0.668469836	2.85E-07	4.55E-06	8599	7375	7594	5050	5371	5413	7.204633845	7.153367589	7.230641294	6.528837615	6.56405011	6.490481888	Acod1	ENSMUSG00000022126	16365	aconitate decarboxylase 1
ENSMUSG00000074802.10	chr10	89408823	89443967	-	Gas2l3	-0.994476757	2.85E-07	4.55E-06	3108	2710	2546	1417	1330	1757	5.736599644	5.70918574	5.654202026	4.695760128	4.550693601	4.867444933	Gas2l3	ENSMUSG00000074802	237436	growth arrest-specific 2 like 3
ENSMUSG00000099681.1	chr11	105177726	105181433	-	1700052K11Rik	1.176365523	2.86E-07	4.56E-06	334	288	248	701	671	725	2.520459181	2.477269958	2.297004066	3.680926402	3.564184395	3.590967763	1700052K11Rik	NA	73431	RIKEN cDNA 1700052K11 gene
ENSMUSG00000030256.11	chr6	145858243	145865558	-	Bhlhe41	-4.996226069	2.89E-07	4.60E-06	203	154	134	10	3	4	1.803481765	1.576305477	1.411364387	-2.381055469	-4.019704272	-3.741939039	Bhlhe41	ENSMUSG00000030256	79362	basic helix-loop-helix family, member e41
ENSMUSG00000008859.7	chr13	17880575	17944239	-	Rala	0.669019989	2.91E-07	4.62E-06	2862	2546	2486	4141	4537	4744	5.617656759	5.619142451	5.61980274	6.242564782	6.320622733	6.3001763	Rala	ENSMUSG00000008859	56044	v-ral simian leukemia viral oncogene A (ras related)
ENSMUSG00000020261.15	chr11	55204350	55236330	+	Slc36a1	-1.375340105	2.91E-07	4.62E-06	1226	1073	1032	394	406	588	4.394928299	4.372948925	4.351828091	2.850508599	2.840052348	3.289034564	Slc36a1	ENSMUSG00000020261	215335	solute carrier family 36 (proton/amino acid symporter), member 1
ENSMUSG00000042460.5	chr6	7844842	7875687	+	C1galt1	-0.852396672	2.91E-07	4.62E-06	3330	2644	2686	1581	1799	1732	5.836119847	5.673621709	5.731414147	4.853704949	4.986321193	4.846775596	C1galt1	ENSMUSG00000042460	94192	core 1 synthase, glycoprotein-N-acetylgalactosamine 3-beta-galactosyltransferase, 1
ENSMUSG00000042759.12	chr7	126584942	126589112	+	Apobr	0.762845389	2.91E-07	4.62E-06	6038	5237	5241	9439	9318	11270	6.694571285	6.659505072	6.695666047	7.431121837	7.358822833	7.548399859	Apobr	ENSMUSG00000042759	171504	apolipoprotein B receptor
ENSMUSG00000069300.3	chr13	22043214	22043676	+	Hist1h2bj	-2.383646896	2.93E-07	4.64E-06	674	407	534	113	101	111	3.532271414	2.975498698	3.401948162	1.053175596	0.838276723	0.889035859	Hist1h2bj	ENSMUSG00000069300	319183	histone cluster 1, H2bj
ENSMUSG00000022641.15	chr16	50191844	50432390	-	Bbx	0.781754317	2.94E-07	4.64E-06	4775	3936	4028	7211	7431	8792	6.356032858	6.247540212	6.315929064	7.042710766	7.032378529	7.190193674	Bbx	ENSMUSG00000022641	70508	bobby sox HMG box containing
ENSMUSG00000026958.13	chr2	25352276	25356359	-	Dpp7	-0.919636094	2.98E-07	4.71E-06	2008	1840	1639	1019	1078	1000	5.106499527	5.150724483	5.018942211	4.220273169	4.247751267	4.054641411	Dpp7	ENSMUSG00000026958	83768	dipeptidylpeptidase 7
ENSMUSG00000106164.1	chr5	101703586	101705850	+	Gm43270	5.077871646	3.00E-07	4.73E-06	10	6	4	217	207	326	-2.473085797	-2.994717833	-3.490172974	1.991498699	1.869908332	2.439075141	9430085M18Rik	NA	77361	RIKEN cDNA 9430085M18 gene
ENSMUSG00000037474.13	chr1	191537356	191575544	-	Dtl	-1.251854311	3.01E-07	4.75E-06	2647	2324	2357	1057	914	1353	5.50501175	5.487547159	5.54294408	4.273069057	4.009780165	4.490615131	Dtl	ENSMUSG00000037474	76843	denticleless E3 ubiquitin protein ligase
ENSMUSG00000015396.3	chr13	43785107	43803130	+	Cd83	-1.122312757	3.01E-07	4.75E-06	1175	1124	1157	553	611	536	4.333655604	4.439910395	4.516698502	3.339066615	3.429149494	3.15557032	Cd83	ENSMUSG00000015396	12522	CD83 antigen
ENSMUSG00000100846.1	chr1	65100619	65119558	-	Gm28845	-0.957820565	3.03E-07	4.77E-06	2996	2361	2477	1382	1300	1628	5.683659439	5.510330269	5.614571366	4.659690874	4.51779149	4.757463964	NA	NA	NA	NA
ENSMUSG00000052776.10	chr5	120896256	120907521	-	Oas1a	-1.015928426	3.04E-07	4.78E-06	1565	1405	1218	708	783	718	4.747004574	4.761710187	4.59079256	3.695251152	3.78673027	3.576980306	Oas1a	ENSMUSG00000052776	246730	2'-5' oligoadenylate synthetase 1A
ENSMUSG00000041801.5	chr1	135766119	135769136	+	Phlda3	-1.149476065	3.07E-07	4.82E-06	4777	4535	4599	2364	2361	2007	6.356636939	6.451888338	6.507163347	5.433946535	5.378428626	5.059320232	Phlda3	ENSMUSG00000041801	27280	pleckstrin homology like domain, family A, member 3
ENSMUSG00000071713.4	chr15	78325990	78351000	+	Csf2rb	-0.75910701	3.09E-07	4.85E-06	3108	2841	2917	1740	1814	2055	5.736599644	5.777279449	5.850418965	4.991913207	4.998297147	5.093409616	Csf2rb	ENSMUSG00000071713	12983	colony stimulating factor 2 receptor, beta, low-affinity (granulocyte-macrophage)
ENSMUSG00000049577.15	chr8	122282141	122337251	+	Zfpm1	-0.888623021	3.12E-07	4.89E-06	1356	1291	1206	747	737	740	4.540270113	4.639674377	4.576514224	3.772556878	3.699440045	3.620491884	Zfpm1	ENSMUSG00000049577	22761	zinc finger protein, multitype 1
ENSMUSG00000048106.5	chr3	19894886	19898984	+	4632415L05Rik	-0.903044114	3.14E-07	4.91E-06	1552	1375	1482	773	821	928	4.734974334	4.730582873	4.873718414	3.82188459	3.855057571	3.946894059	4632415L05Rik	ENSMUSG00000048106	70808	RRS1 ribosome biogenesis regulator homolog pseudogene
ENSMUSG00000051495.7	chr8	126588296	126593986	-	Irf2bp2	0.848274698	3.16E-07	4.94E-06	2606	2461	2527	4734	4500	5423	5.482494925	5.570164473	5.643397401	6.435623467	6.308810382	6.493144424	Irf2bp2	ENSMUSG00000051495	270110	interferon regulatory factor 2 binding protein 2
ENSMUSG00000024222.16	chr17	28399095	28517524	-	Fkbp5	-0.934701372	3.17E-07	4.94E-06	1169	1080	1109	601	652	625	4.326272927	4.382325806	4.455595976	3.459048036	3.522774897	3.377002033	Fkbp5	ENSMUSG00000024222	14229	FK506 binding protein 5
ENSMUSG00000039741.15	chr11	120232947	120292296	+	Bahcc1	1.515840997	3.16E-07	4.94E-06	557	563	447	1543	1352	1922	3.257424776	3.443114249	3.145645896	4.818616876	4.574353684	4.996903842	Bahcc1	ENSMUSG00000039741	268515	BAH domain and coiled-coil containing 1
ENSMUSG00000069892.9	chr11	49015874	49051242	-	9930111J21Rik2	-1.725659419	3.20E-07	4.99E-06	1627	1259	1215	376	368	602	4.803038609	4.603477856	4.587236202	2.783133163	2.698461615	3.32295339	9930111J21Rik2	ENSMUSG00000069892	245240	RIKEN cDNA 9930111J21 gene 2
ENSMUSG00000003032.8	chr4	55527143	55532466	-	Klf4	1.170840068	3.21E-07	5.00E-06	214	205	200	476	499	516	1.879430618	1.987837033	1.987360451	3.122959513	3.137281673	3.100760498	Klf4	ENSMUSG00000003032	16600	Kruppel-like factor 4 (gut)
ENSMUSG00000025466.19	chr7	140096770	140102441	-	Fuom	-1.701752385	3.21E-07	5.00E-06	371	375	323	112	134	106	2.671815181	2.857511546	2.677523926	1.0404083	1.244403168	0.822845579	Fuom	ENSMUSG00000025466	69064	fucose mutarotase
ENSMUSG00000032536.10	chr9	121297502	121474918	+	Trak1	0.744687494	3.22E-07	5.01E-06	1694	1590	1545	2814	2738	3106	4.861240702	4.940107105	4.933759963	5.685290041	5.592110971	5.689210298	Trak1	ENSMUSG00000032536	67095	trafficking protein, kinesin binding 1
ENSMUSG00000064210.6	chr15	95790843	95975464	+	Ano6	0.807047118	3.23E-07	5.01E-06	2842	2769	2591	4832	5426	5094	5.607541414	5.740252272	5.679473703	6.465181126	6.578747075	6.402860804	Ano6	ENSMUSG00000064210	105722	anoctamin 6
ENSMUSG00000017724.14	chr11	101769742	101785371	-	Etv4	-1.152564881	3.24E-07	5.03E-06	692	587	620	264	313	337	3.570267042	3.50328749	3.617189424	2.273751021	2.465262438	2.486879651	Etv4	ENSMUSG00000017724	18612	ets variant 4
ENSMUSG00000018362.14	chr11	106988629	106999541	-	Kpna2	-0.670646354	3.27E-07	5.07E-06	9785	8607	8289	5718	6158	6017	7.391026634	7.376221009	7.356971394	6.708048162	6.761304093	6.643084481	Kpna2	ENSMUSG00000018362	16647	karyopherin (importin) alpha 2
ENSMUSG00000060981.6	chr13	23531050	23531522	+	Hist1h4h	-2.130803015	3.27E-07	5.07E-06	1731	1974	1716	461	561	333	4.892403453	5.252114101	5.085156166	3.076813946	3.306083018	2.46967891	Hist1h4h	ENSMUSG00000060981	69386	histone cluster 1, H4h
ENSMUSG00000020432.12	chr11	3917192	3932159	-	Tcn2	-2.16504393	3.28E-07	5.08E-06	366	344	335	57	87	111	2.652266169	2.733202622	2.73007098	0.07211716	0.624151918	0.889035859	Tcn2	ENSMUSG00000020432	21452	transcobalamin 2
ENSMUSG00000017754.13	chr2	164839518	164857711	-	Pltp	1.630749528	3.30E-07	5.10E-06	798	731	720	2362	2029	3175	3.775745378	3.819556503	3.832756644	5.432725723	5.15984943	5.720904014	Pltp	ENSMUSG00000017754	18830	phospholipid transfer protein
ENSMUSG00000032400.17	chr9	64137144	64173104	-	Zwilch	-1.290325165	3.33E-07	5.14E-06	3341	2490	2638	1180	1043	1489	5.84087694	5.587062145	5.705404292	4.431809435	4.200155691	4.628748367	Zwilch	ENSMUSG00000032400	68014	zwilch kinetochore protein
ENSMUSG00000052560.15	chr15	90487482	90679432	-	Cpne8	1.009858269	3.38E-07	5.21E-06	2446	2142	1963	4470	4172	5519	5.391100348	5.369921938	5.279113907	6.352847591	6.19963714	6.518457826	Cpne8	ENSMUSG00000052560	66871	copine VIII
ENSMUSG00000039879.8	chr10	17900466	17948067	-	Heca	-1.045919982	3.39E-07	5.22E-06	2898	2430	2433	1331	1468	1225	5.635687551	5.551879868	5.588719084	4.605463822	4.693068356	4.347290728	Heca	ENSMUSG00000039879	380629	hdc homolog, cell cycle regulator
ENSMUSG00000025651.14	chr9	108936633	108949623	+	Uqcrc1	0.740825272	3.42E-07	5.25E-06	11527	10998	9965	18931	18098	21065	7.627388826	7.729861608	7.6226285	8.435128213	8.316523317	8.450730498	Uqcrc1	ENSMUSG00000025651	22273	ubiquinol-cytochrome c reductase core protein 1
ENSMUSG00000032497.15	chr9	111117592	111225668	+	Lrrfip2	0.663247699	3.42E-07	5.25E-06	2092	1868	1817	3062	3289	3428	5.165608688	5.172507297	5.167641673	5.807121237	5.856593403	5.831497766	Lrrfip2	ENSMUSG00000032497	71268	leucine rich repeat (in FLII) interacting protein 2
ENSMUSG00000032555.9	chr9	103305215	103350428	+	Topbp1	-0.73960173	3.42E-07	5.25E-06	11428	10016	9863	6385	7068	6578	7.614945221	7.594933314	7.607785978	6.867210984	6.960129185	6.771678908	Topbp1	ENSMUSG00000032555	235559	topoisomerase (DNA) II binding protein 1
ENSMUSG00000090150.8	chr9	104063377	104127656	+	Acad11	-0.680566895	3.41E-07	5.25E-06	4674	4187	4184	2689	3002	3014	6.325193123	6.336715924	6.370741556	5.619749382	5.724889336	5.645838973	Acad11	ENSMUSG00000090150	102632	acyl-Coenzyme A dehydrogenase family, member 11
ENSMUSG00000097971.3	chr17	39843013	39846341	+	Gm26917	-1.036569027	3.42E-07	5.25E-06	863288	777420	705132	372163	459904	391898	13.85408003	13.87317807	13.76743688	12.73220415	12.98391559	12.66825648	NA	NA	NA	NA
ENSMUSG00000022881.14	chr16	23113943	23127737	-	Rfc4	-1.124950005	3.44E-07	5.27E-06	1458	1296	1181	563	598	777	4.644866452	4.64524894	4.546305938	3.364898909	3.398148243	3.690834824	Rfc4	ENSMUSG00000022881	106344	replication factor C (activator 1) 4
ENSMUSG00000021453.2	chr13	51846678	51848468	+	Gadd45g	1.276847041	3.46E-07	5.29E-06	257	248	220	590	575	719	2.143025403	2.26194449	2.12453687	3.432420358	3.341612924	3.578986836	Gadd45g	ENSMUSG00000021453	23882	growth arrest and DNA-damage-inducible 45 gamma
ENSMUSG00000026411.17	chr1	136008150	136035342	+	Tmem9	-3.651295063	3.46E-07	5.29E-06	201	232	233	12	28	18	1.789232809	2.165929355	2.207180764	-2.129516702	-0.99416918	-1.702410675	Tmem9	ENSMUSG00000026411	66241	transmembrane protein 9
ENSMUSG00000017707.9	chr2	163623272	163645131	-	Serinc3	-0.907845351	3.50E-07	5.34E-06	33031	28224	28199	15649	18908	16463	9.146151646	9.089502852	9.123283987	8.160456052	8.379688105	8.095119412	Serinc3	ENSMUSG00000017707	26943	serine incorporator 3
ENSMUSG00000046711.15	chr17	27556620	27563674	+	Hmga1	0.816389873	3.50E-07	5.34E-06	5058	5135	4533	9074	8659	10013	6.43909071	6.63113148	6.486311594	7.374229547	7.253008816	7.377794664	Hmga1	ENSMUSG00000046711	15361	high mobility group AT-hook 1
ENSMUSG00000032298.13	chr9	57142800	57148305	-	Neil1	1.079765898	3.51E-07	5.35E-06	509	498	521	1136	1059	1260	3.127535117	3.266292143	3.366425467	4.377009077	4.222108678	4.387916362	Neil1	ENSMUSG00000032298	72774	nei endonuclease VIII-like 1 (E. coli)
ENSMUSG00000040219.4	chr9	49436963	49486225	-	Ttc12	0.921021697	3.53E-07	5.38E-06	1013	881	784	1649	1742	2029	4.119727154	4.088659208	3.955531661	4.914440171	4.939883746	5.075044584	Ttc12	ENSMUSG00000040219	235330	tetratricopeptide repeat domain 12
ENSMUSG00000097664.1	chr10	91149515	91150594	+	Gm26765	-0.950398407	3.53E-07	5.38E-06	1067	886	895	525	530	518	4.194617135	4.09681927	4.146451646	3.264174063	3.224149747	3.106336138	NA	NA	NA	NA
ENSMUSG00000060093.6	chr13	23760692	23761230	-	Hist1h4a	-2.259195234	3.55E-07	5.39E-06	1182	1322	1268	291	367	208	4.342221249	4.673894456	4.648809828	2.413979182	2.694541245	1.792039533	Hist1h4a	ENSMUSG00000060093	326619	histone cluster 1, H4a
ENSMUSG00000069268.4	chr13	23573736	23574196	-	Hist1h2bf	-2.294844321	3.56E-07	5.40E-06	399	402	320	100	85	63	2.776648474	2.957687422	2.664082571	0.8776788	0.590793321	0.076820646	Hist1h2bf	ENSMUSG00000069268	319180	histone cluster 1, H2bf
ENSMUSG00000016087.13	chr9	32422204	32542861	-	Fli1	0.821612314	3.58E-07	5.42E-06	2749	2311	2275	4333	4286	5264	5.559550352	5.479456096	5.491869895	6.307944098	6.238525234	6.45021676	Fli1	ENSMUSG00000016087	14247	Friend leukemia integration 1
ENSMUSG00000021280.8	chr12	111417430	111431182	+	Exoc3l4	1.619308667	3.58E-07	5.42E-06	113	90	102	338	344	322	0.961145268	0.804688336	1.019382124	2.629639132	2.601300978	2.421291309	Exoc3l4	ENSMUSG00000021280	74190	exocyst complex component 3-like 4
ENSMUSG00000072872.3	chr6	100228565	100287485	-	Rybp	-0.856614972	3.58E-07	5.42E-06	1093	925	930	552	568	618	4.229334286	4.158931629	4.201764364	3.336457763	3.323957345	3.360765744	Rybp	ENSMUSG00000072872	56353	RING1 and YY1 binding protein
ENSMUSG00000021725.8	chr13	116854824	117025516	-	Parp8	-5.121171522	3.60E-07	5.44E-06	298	249	274	3	7	21	2.356183902	2.267738454	2.440564363	-3.966017969	-2.920168599	-1.485599286	Parp8	ENSMUSG00000021725	52552	poly (ADP-ribose) polymerase family, member 8
ENSMUSG00000026785.14	chr2	30077684	30091022	+	Pkn3	0.939076476	3.61E-07	5.44E-06	1137	1057	933	2145	1935	2334	4.286247611	4.351284397	4.206408236	5.293725294	5.091431398	5.277033832	Pkn3	ENSMUSG00000026785	263803	protein kinase N3
ENSMUSG00000073557.11	chr1	134754658	134955942	-	Ppp1r12b	-0.805016818	3.60E-07	5.44E-06	2097	1676	1752	1061	1134	1176	5.169051876	5.016079217	5.115100753	4.278515764	4.320781699	4.288421564	Ppp1r12b	ENSMUSG00000073557	329251	protein phosphatase 1, regulatory (inhibitor) subunit 12B
ENSMUSG00000039377.7	chr1	184727140	184732619	-	Hlx	-1.966618379	3.63E-07	5.47E-06	228	224	205	61	49	70	1.970647136	2.115414084	2.022896608	0.169141614	-0.197702574	0.227687312	Hlx	ENSMUSG00000039377	15284	H2.0-like homeobox
ENSMUSG00000022180.6	chr14	54722216	54781886	-	Slc7a8	-1.814534998	3.64E-07	5.48E-06	586	504	479	167	118	200	3.330584079	3.283552908	3.245289029	1.614644394	1.061684055	1.735594386	Slc7a8	ENSMUSG00000022180	50934	solute carrier family 7 (cationic amino acid transporter, y+ system), member 8
ENSMUSG00000032376.12	chr9	66514637	66593142	-	Usp3	0.886198734	3.67E-07	5.52E-06	2037	1807	1882	3461	3532	4372	5.127181125	5.124622381	5.218336174	5.983808741	5.959414651	6.182378628	Usp3	ENSMUSG00000032376	235441	ubiquitin specific peptidase 3
ENSMUSG00000037349.9	chr19	6993018	6996117	-	Nudt22	0.766018629	3.68E-07	5.53E-06	1101	944	911	1759	1723	1886	4.23985056	4.188249435	4.17200087	5.007576907	4.924066389	4.969632344	Nudt22	ENSMUSG00000037349	68323	nudix (nucleoside diphosphate linked moiety X)-type motif 22
ENSMUSG00000085995.2	chr7	48877958	48913040	+	Gm2788	-2.53954055	3.69E-07	5.54E-06	304	275	211	35	60	51	2.384895199	2.410750957	2.064415877	-0.623625772	0.091804043	-0.225363514	Gm2788	NA	100040465	predicted gene 2788
ENSMUSG00000082163.2	chr2	156994173	156994892	-	Gm14276	-2.225950075	3.71E-07	5.57E-06	186	182	145	33	40	43	1.677628601	1.816595103	1.524777367	-0.707283701	-0.487209191	-0.468920545	Gm14276	NA	668943	ribosomal protein S2 pseudogene
ENSMUSG00000030560.17	chr7	88278085	88310888	+	Ctsc	-0.716388887	3.74E-07	5.61E-06	4833	4384	4223	2791	3055	2897	6.373449307	6.403039063	6.38412536	5.673451949	5.750133571	5.588728905	Ctsc	ENSMUSG00000030560	13032	cathepsin C
ENSMUSG00000070565.11	chr1	157135182	157412595	-	Rasal2	0.805474412	3.76E-07	5.62E-06	973	845	891	1620	1614	1829	4.061633949	4.028503393	4.139993012	4.888850414	4.829812531	4.92536966	Rasal2	ENSMUSG00000070565	226525	RAS protein activator like 2
ENSMUSG00000078851.4	chr11	58954685	58956830	+	Hist3h2a	-1.823026887	3.76E-07	5.62E-06	854	959	731	268	287	216	3.873533462	4.210981445	3.854616078	2.295405387	2.340358951	1.846359174	Hist3h2a	ENSMUSG00000078851	319162	histone cluster 3, H2a
ENSMUSG00000032122.14	chr9	37229149	37255738	-	Slc37a2	0.691475936	3.80E-07	5.68E-06	2029	1728	1635	2984	3062	3242	5.121505405	5.060147337	5.015418068	5.769900647	5.753434934	5.751026818	Slc37a2	ENSMUSG00000032122	56857	solute carrier family 37 (glycerol-3-phosphate transporter), member 2
ENSMUSG00000032531.15	chr9	102716672	102733418	+	Amotl2	-4.845650161	3.83E-07	5.72E-06	77	72	82	4	3	1	0.410721186	0.484751539	0.706224239	-3.60344789	-4.019704272	-5.32690154	Amotl2	ENSMUSG00000032531	56332	angiomotin-like 2
ENSMUSG00000070284.10	chr9	108049242	108052801	+	Gmppb	0.856404037	3.83E-07	5.72E-06	1439	1492	1295	2676	2607	2889	4.625948854	4.848357665	4.679195324	5.612759046	5.521392343	5.584740114	Gmppb	ENSMUSG00000070284	331026	GDP-mannose pyrophosphorylase B
ENSMUSG00000048429.10	chr9	21592722	21595970	+	1810026J23Rik	0.988345969	3.84E-07	5.72E-06	3060	2862	2716	5850	5386	7211	5.714148434	5.787902427	5.747435356	6.74097132	6.568073244	6.904219617	Timm29	ENSMUSG00000048429	69773	translocase of inner mitochondrial membrane 29
ENSMUSG00000086665.1	chr4	150049013	150056976	+	Gm13067	-1.569465519	3.86E-07	5.74E-06	336	279	262	105	111	99	2.529059475	2.431546922	2.376075637	0.947726297	0.973840706	0.72476058	Gm13067	NA	102636131	predicted gene 13067
ENSMUSG00000029366.10	chr5	88764996	88783281	+	Dck	-0.969531245	3.87E-07	5.76E-06	3058	2547	2480	1405	1304	1716	5.713205341	5.61970888	5.616317266	4.683494847	4.522222034	4.833390101	Dck	ENSMUSG00000029366	13178	deoxycytidine kinase
ENSMUSG00000032249.14	chr9	62341293	62378812	+	Anp32a	0.840091705	3.91E-07	5.80E-06	5598	4954	4889	9311	8959	11415	6.585421405	6.579366204	6.595373252	7.411424985	7.302143313	7.56684239	Anp32a	ENSMUSG00000032249	11737	acidic (leucine-rich) nuclear phosphoprotein 32 family, member A
ENSMUSG00000064220.6	chr3	96245497	96246082	+	Hist2h2aa1	-1.468678932	3.93E-07	5.83E-06	595	612	592	254	233	210	3.352554479	3.563408483	3.550573368	2.218148955	2.040219545	1.805812382	Hist2h2aa1	ENSMUSG00000064220	15267	histone cluster 2, H2aa1
ENSMUSG00000039007.9	chr15	33083129	33594552	+	Cpq	3.616372364	3.94E-07	5.84E-06	10	7	16	150	140	137	-2.473085797	-2.788266956	-1.615703856	1.460246785	1.307367126	1.191423768	Cpq	ENSMUSG00000039007	54381	carboxypeptidase Q
ENSMUSG00000099481.6	chr7	102065511	102083765	+	Xndc1	-0.976207582	3.95E-07	5.85E-06	1137	974	1008	584	565	546	4.286247611	4.233360824	4.317897393	3.417686323	3.31632402	3.182213645	Xndc1	ENSMUSG00000099481	102443350	Xrcc1 N-terminal domain containing 1
ENSMUSG00000032312.6	chr9	57626647	57645653	-	Csk	0.765775436	3.96E-07	5.86E-06	6214	6029	5686	10468	10110	12109	6.736019386	6.862665104	6.813227266	7.580394226	7.476507531	7.651987636	Csk	ENSMUSG00000032312	12988	c-src tyrosine kinase
ENSMUSG00000020534.14	chr11	60788104	60811718	-	Shmt1	-0.988512999	3.97E-07	5.87E-06	1673	1516	1524	801	939	806	4.843249616	4.871372232	4.914022459	3.873185819	4.048690157	3.743666682	Shmt1	ENSMUSG00000020534	20425	serine hydroxymethyltransferase 1 (soluble)
ENSMUSG00000105528.1	chr5	14027894	14029765	+	Gm43519	-5.54077379	3.97E-07	5.87E-06	40	22	33	0	1	0	-0.525553216	-1.203304455	-0.594008785	-6.773372891	-5.242096694	-6.911864041	NA	NA	NA	NA
ENSMUSG00000026628.13	chr1	191170296	191218039	-	Atf3	-2.621612287	3.99E-07	5.88E-06	182	164	158	26	40	23	1.646349434	1.666786223	1.648241054	-1.045452437	-0.487209191	-1.357275189	Atf3	ENSMUSG00000026628	11910	activating transcription factor 3
ENSMUSG00000043391.9	chr16	21649045	21694665	-	2510009E07Rik	0.677690298	3.99E-07	5.88E-06	5331	4625	4507	7455	8444	8846	6.514922553	6.480236058	6.478013801	7.090716503	7.216737094	7.199027029	2510009E07Rik	ENSMUSG00000043391	72190	RIKEN cDNA 2510009E07 gene
ENSMUSG00000046879.6	chr11	48861968	48871683	-	Irgm1	-0.817747814	4.00E-07	5.89E-06	2222	2052	1832	1232	1152	1316	5.252564484	5.308008956	5.179499507	4.49399904	4.343491841	4.450627765	Irgm1	ENSMUSG00000046879	15944	immunity-related GTPase family M member 1
ENSMUSG00000021892.14	chr14	31359880	31436078	-	Sh3bp5	1.241049756	4.01E-07	5.90E-06	1158	1077	985	2470	2390	3357	4.31263911	4.378314603	4.284614085	5.497214449	5.396037496	5.801307643	Sh3bp5	ENSMUSG00000021892	24056	SH3-domain binding protein 5 (BTK-associated)
ENSMUSG00000032519.11	chr9	120110374	120124504	+	Slc25a38	0.70712562	4.02E-07	5.91E-06	1358	1218	1130	2052	2138	2272	4.542395631	4.555732985	4.482647301	5.229793615	5.235324298	5.238200538	Slc25a38	ENSMUSG00000032519	208638	solute carrier family 25, member 38
ENSMUSG00000026383.14	chr1	119545037	119649000	-	Epb41l5	0.964391758	4.03E-07	5.92E-06	444	398	414	851	892	877	2.93063639	2.943278363	3.035130316	3.960489828	3.974649165	3.865391274	Epb41l5	ENSMUSG00000026383	226352	erythrocyte membrane protein band 4.1 like 5
ENSMUSG00000011958.17	chr9	69989466	70008317	+	Bnip2	0.716143158	4.06E-07	5.95E-06	4686	4102	3822	6694	7713	7726	6.328891948	6.307130067	6.240202811	6.935387701	7.086110722	7.003735285	Bnip2	ENSMUSG00000011958	12175	BCL2/adenovirus E1B interacting protein 2
ENSMUSG00000033596.5	chr8	111270944	111300222	-	Rfwd3	-0.854117539	4.06E-07	5.95E-06	7127	6540	6230	3765	4271	3744	6.9337772	6.980027663	6.945034254	6.105252838	6.233467873	5.958693333	Rfwd3	ENSMUSG00000033596	234736	ring finger and WD repeat domain 3
ENSMUSG00000021572.8	chr13	74036495	74062285	-	Cep72	-2.049771731	4.09E-07	5.98E-06	366	415	394	103	115	86	2.652266169	3.003547116	2.963783514	0.920114066	1.024689847	0.522764187	Cep72	ENSMUSG00000021572	74470	centrosomal protein 72
ENSMUSG00000032382.14	chr9	66088133	66126587	-	Snx1	0.814958162	4.11E-07	6.01E-06	5907	5329	4922	9322	9465	11706	6.66292879	6.684626923	6.605077515	7.413128285	7.381403806	7.603158143	Snx1	ENSMUSG00000032382	56440	sorting nexin 1
ENSMUSG00000027203.15	chr2	125247190	125258608	+	Dut	-0.826745069	4.14E-07	6.04E-06	2289	2146	1991	1163	1384	1331	5.29541363	5.372612906	5.299541789	4.410882604	4.608090144	4.466972672	Dut	ENSMUSG00000027203	110074	deoxyuridine triphosphatase
ENSMUSG00000019471.9	chr9	21138541	21149906	-	Cdc37	0.816436049	4.14E-07	6.05E-06	6444	6494	5787	11649	12055	11527	6.788449496	6.969845193	6.838626597	7.734607523	7.730344673	7.580928004	Cdc37	ENSMUSG00000019471	12539	cell division cycle 37
ENSMUSG00000031669.10	chr8	95633453	95645060	+	Gins3	-1.285607753	4.16E-07	6.07E-06	789	806	802	328	391	334	3.759392237	3.960373172	3.988259606	2.586376669	2.785809303	2.47399836	Gins3	ENSMUSG00000031669	78833	GINS complex subunit 3 (Psf3 homolog)
ENSMUSG00000039735.15	chr3	122538719	122619715	-	Fnbp1l	0.778455467	4.16E-07	6.07E-06	1797	1426	1387	2651	2835	2934	4.946372836	4.78310648	4.77817408	5.599220142	5.642328247	5.607034952	Fnbp1l	ENSMUSG00000039735	214459	formin binding protein 1-like
ENSMUSG00000020889.11	chr11	98767932	98775333	-	Nr1d1	1.267550575	4.18E-07	6.08E-06	497	431	491	1130	1092	1447	3.093149496	3.058059198	3.280949631	4.369372385	4.26635837	4.587483592	Nr1d1	ENSMUSG00000020889	217166	nuclear receptor subfamily 1, group D, member 1
ENSMUSG00000043079.17	chr18	60593973	60660142	-	Synpo	1.178857912	4.19E-07	6.10E-06	543	455	543	1169	1136	1428	3.220733006	3.136149693	3.426038249	4.418303255	4.323322774	4.56842128	Synpo	ENSMUSG00000043079	104027	synaptopodin
ENSMUSG00000037337.11	chr7	28982050	29003279	+	Map4k1	-0.68647159	4.22E-07	6.13E-06	6188	5500	5358	3779	3534	4010	6.729970829	6.7301895	6.727515514	6.110606782	5.960231232	6.057702356	Map4k1	ENSMUSG00000037337	26411	mitogen-activated protein kinase kinase kinase kinase 1
ENSMUSG00000015357.10	chr9	65294260	65330658	+	Clpx	1.055113271	4.23E-07	6.14E-06	1956	1682	1601	3360	3676	4685	5.068656176	5.021233238	4.985110107	5.941087297	6.017058075	6.282123253	Clpx	ENSMUSG00000015357	270166	caseinolytic mitochondrial matrix peptidase chaperone subunit
ENSMUSG00000044345.9	chr19	42147400	42151703	+	Marveld1	1.162669086	4.24E-07	6.16E-06	1157	1271	1194	2933	3020	2710	4.311393259	4.617158196	4.562093163	5.745034385	5.733512477	5.492479251	Marveld1	ENSMUSG00000044345	277010	MARVEL (membrane-associating) domain containing 1
ENSMUSG00000030852.16	chr7	130577438	130764785	+	Tacc2	1.454888477	4.26E-07	6.17E-06	474	474	450	1297	1163	1677	3.024861058	3.195106726	3.15528532	4.568145932	4.357196301	4.80023301	Tacc2	ENSMUSG00000030852	57752	transforming, acidic coiled-coil containing protein 2
ENSMUSG00000022008.3	chr14	76086232	76110815	-	Gpalpp1	0.647611069	4.31E-07	6.24E-06	3137	2709	2610	4373	4730	5050	5.749996524	5.708653381	5.690012468	6.321199687	6.380717771	6.390346466	Gpalpp1	ENSMUSG00000022008	67467	GPALPP motifs containing 1
ENSMUSG00000032097.9	chr9	44604892	44640731	+	Ddx6	0.689030726	4.34E-07	6.28E-06	4723	3932	3965	6586	7270	7892	6.340237324	6.246073499	6.293189092	6.911923428	7.000779674	7.034402599	Ddx6	ENSMUSG00000032097	13209	DEAD (Asp-Glu-Ala-Asp) box polypeptide 6
ENSMUSG00000013928.13	chr7	30280094	30290237	+	Thap8	-2.175939262	4.35E-07	6.28E-06	185	177	151	44	33	44	1.669872157	1.776517663	1.583076008	-0.29763946	-0.760970004	-0.43613061	Thap8	NA	75629	THAP domain containing 8
ENSMUSG00000110682.1	chr8	122760045	122763021	-	RP24-94F12.3	-3.938213991	4.36E-07	6.30E-06	80	65	66	4	3	7	0.465513659	0.33826545	0.39518446	-3.60344789	-4.019704272	-3.004973445	NA	NA	NA	NA
ENSMUSG00000027298.17	chr2	119797733	119818104	+	Tyro3	-1.871445562	4.41E-07	6.36E-06	223	208	215	54	58	77	1.938727802	2.008746022	2.091446083	-0.005188567	0.043305525	0.364260364	Tyro3	ENSMUSG00000027298	22174	TYRO3 protein tyrosine kinase 3
ENSMUSG00000029994.17	chr6	86736840	86793584	-	Anxa4	1.091298419	4.45E-07	6.41E-06	1834	1551	1448	3538	4098	3378	4.97576797	4.90429043	4.840245994	6.015549313	6.173821088	5.810303099	Anxa4	ENSMUSG00000029994	11746	annexin A4
ENSMUSG00000060716.6	chr12	79029163	79081648	+	Plekhh1	-1.22550043	4.51E-07	6.49E-06	620	533	544	227	293	258	3.411884181	3.36418691	3.428690263	2.056349844	2.370157499	2.102156429	Plekhh1	ENSMUSG00000060716	211945	pleckstrin homology domain containing, family H (with MyTH4 domain) member 1
ENSMUSG00000026198.15	chr1	75171717	75180392	-	Abcb6	1.025432236	4.51E-07	6.49E-06	968	924	821	1944	2113	1851	4.054205019	4.157371958	4.022018789	5.151810628	5.218359203	4.942614793	Abcb6	ENSMUSG00000026198	74104	ATP-binding cassette, sub-family B (MDR/TAP), member 6
ENSMUSG00000021756.12	chr13	112464070	112510086	+	Il6st	0.905146314	4.53E-07	6.51E-06	3777	3100	3242	6119	6281	7944	6.017812821	5.903127623	6.002792883	6.805825174	6.789834201	7.043876668	Il6st	ENSMUSG00000021756	16195	interleukin 6 signal transducer
ENSMUSG00000006930.15	chr11	100347327	100356128	-	Hap1	0.772076279	4.59E-07	6.59E-06	1588	1449	1482	2790	2690	2769	4.768046155	4.806182067	4.873718414	5.67293504	5.566599397	5.523545782	Hap1	ENSMUSG00000006930	15114	huntingtin-associated protein 1
ENSMUSG00000087060.7	chr11	16935154	16951282	-	Eldr	-1.80570043	4.59E-07	6.59E-06	193	181	189	54	59	58	1.730786537	1.808668187	1.905956062	-0.005188567	0.067758569	-0.041499321	Eldr	NA	72735	Egfr long non-coding downstream RNA
ENSMUSG00000073430.4	chr17	27342460	27344825	+	Gm10505	-2.289669154	4.61E-07	6.61E-06	191	150	149	36	28	43	1.715797363	1.538462126	1.563903698	-0.583548333	-0.99416918	-0.468920545	Gm10505	NA	100038429	predicted gene 10505
ENSMUSG00000021591.7	chr13	75839868	75850151	+	Glrx	0.680351352	4.62E-07	6.62E-06	2250	2151	2030	3529	3547	3949	5.27062663	5.375969574	5.327521336	6.011875215	5.965527775	6.035590266	Glrx	ENSMUSG00000021591	93692	glutaredoxin
ENSMUSG00000029209.15	chr5	69573108	69592340	-	Gnpda2	-1.034907594	4.63E-07	6.62E-06	957	857	878	442	514	451	4.037725458	4.04883531	4.1188005	3.016160754	3.179968073	2.906718137	Gnpda2	ENSMUSG00000029209	67980	glucosamine-6-phosphate deaminase 2
ENSMUSG00000032392.10	chr9	65214690	65239219	+	Parp16	2.017130091	4.65E-07	6.64E-06	80	76	64	304	273	385	0.465513659	0.562230292	0.35112928	2.476925526	2.268337828	2.678723009	Parp16	ENSMUSG00000032392	214424	poly (ADP-ribose) polymerase family, member 16
ENSMUSG00000023068.14	chr10	52417547	52440192	+	Nus1	0.781335688	4.68E-07	6.67E-06	2098	1785	1913	3461	3297	3900	5.169739529	5.106954867	5.24190021	5.983808741	5.86009775	6.017579317	Nus1	ENSMUSG00000023068	52014	NUS1 dehydrodolichyl diphosphate synthase subunit
ENSMUSG00000087193.7	chrX	8042943	8074619	+	Gm14820	-1.119479265	4.70E-07	6.70E-06	705	664	661	333	352	315	3.597099053	3.680967838	3.709499371	2.60817006	2.634420253	2.389632154	NA	NA	NA	NA
ENSMUSG00000015355.13	chr1	171682009	171705258	+	Cd48	-3.738137606	4.73E-07	6.73E-06	125	100	104	5	14	8	1.106140335	0.95589414	1.047261156	-3.313941273	-1.969078199	-2.8244012	Cd48	ENSMUSG00000015355	12506	CD48 antigen
ENSMUSG00000015882.17	chr5	45697181	45857615	-	Lcorl	-0.775269897	4.80E-07	6.83E-06	2069	1749	1835	1107	1228	1193	5.149663314	5.077569398	5.181859423	4.339718092	4.435622948	4.30911881	Lcorl	ENSMUSG00000015882	209707	ligand dependent nuclear receptor corepressor-like
ENSMUSG00000030254.16	chr6	112619850	112696686	-	Rad18	-0.73878473	4.83E-07	6.86E-06	2881	2370	2427	1506	1607	1802	5.627201085	5.515818127	5.585157605	4.783612066	4.823543828	4.903919503	Rad18	ENSMUSG00000030254	58186	RAD18 E3 ubiquitin protein ligase
ENSMUSG00000040533.7	chr4	130944385	130955475	+	Matn1	-1.657708795	4.83E-07	6.86E-06	418	381	391	131	161	115	2.843680593	2.880381696	2.952770522	1.265546098	1.50833116	0.939885001	Matn1	ENSMUSG00000040533	17180	matrilin 1, cartilage matrix protein
ENSMUSG00000045896.14	chr6	83805401	83831741	-	Paip2b	-0.905053656	4.83E-07	6.86E-06	1805	1536	1577	876	856	1083	4.952779486	4.8902745	4.963326314	4.002237389	3.915250242	4.169619397	Paip2b	ENSMUSG00000045896	232164	poly(A) binding protein interacting protein 2B
ENSMUSG00000078490.9	chr4	155409190	155466823	+	Cfap74	2.169361418	4.85E-07	6.88E-06	59	33	43	204	206	232	0.029414544	-0.629068361	-0.21715448	1.902584142	1.862938777	1.949222865	Cfap74	ENSMUSG00000078490	544678	cilia and flagella associated protein 74
ENSMUSG00000039616.9	chr18	24653691	24701556	+	Mocos	1.31285734	4.87E-07	6.90E-06	252	217	173	527	543	628	2.114736358	2.06971404	1.778693877	3.269654392	3.259077031	3.383904894	Mocos	ENSMUSG00000039616	68591	molybdenum cofactor sulfurase
ENSMUSG00000086298.1	chr11	107338050	107344804	+	Gm11716	1.677077911	4.90E-07	6.92E-06	75	63	69	216	250	245	0.37300152	0.293527136	0.458843097	1.984850323	2.141607599	2.027715173	Gm11716	NA	102640379	predicted gene 11716
ENSMUSG00000105518.1	chr3	90601904	90605885	+	Gm42674	0.791723176	4.89E-07	6.92E-06	46577	43171	38198	71792	84523	80372	9.641942367	9.702634049	9.561130391	10.35817262	10.54000569	10.3825503	NA	NA	NA	NA
ENSMUSG00000003283.13	chr2	153108468	153151441	+	Hck	0.644665927	4.91E-07	6.94E-06	3490	3338	3193	5333	5474	5955	5.903814777	6.009826774	5.980824759	6.607493976	6.591452296	6.62814288	Hck	ENSMUSG00000003283	15162	hemopoietic cell kinase
ENSMUSG00000079009.8	chr2	150181755	150193279	+	Gm14139	-4.54176473	4.96E-07	7.01E-06	55	34	29	1	1	2	-0.070987353	-0.586633094	-0.777454926	-5.188410391	-5.242096694	-4.589935946	Gm14139	ENSMUSG00000079009	100271882	predicted gene 14139
ENSMUSG00000035891.16	chr15	86139128	86186141	-	Cerk	-0.855452508	4.97E-07	7.02E-06	1052	943	865	553	546	588	4.174201299	4.186721156	4.097292034	3.339066615	3.267018491	3.289034564	Cerk	ENSMUSG00000035891	223753	ceramide kinase
ENSMUSG00000066058.11	chr4	119255414	119262438	+	Cldn19	-3.199049091	5.01E-07	7.07E-06	119	80	97	12	11	10	1.035463589	0.635759327	0.947232338	-2.129516702	-2.303497238	-2.519546618	Cldn19	ENSMUSG00000066058	242653	claudin 19
ENSMUSG00000025240.8	chr9	123529882	123592598	+	Sacm1l	0.855221961	5.03E-07	7.09E-06	2617	2261	2062	4092	4865	4451	5.488570603	5.44790673	5.350080428	6.22539381	6.421313161	6.2082118	Sacm1l	ENSMUSG00000025240	83493	SAC1 suppressor of actin mutations 1-like (yeast)
ENSMUSG00000097279.1	chr5	8773577	8798523	-	Gm5106	-0.904831807	5.06E-07	7.12E-06	1347	1076	1121	633	709	677	4.530666338	4.376975053	4.471115929	3.533827918	3.64359968	3.492213095	Gm5106	NA	330031	predicted gene 5106
ENSMUSG00000029816.10	chr6	49036546	49070929	+	Gpnmb	-2.843898259	5.07E-07	7.13E-06	102	82	101	13	13	15	0.81407688	0.671164663	1.005237941	-2.018485389	-2.072171692	-1.95766773	Gpnmb	ENSMUSG00000029816	93695	glycoprotein (transmembrane) nmb
ENSMUSG00000030393.8	chr7	10487229	10495394	-	Zik1	-1.307098672	5.08E-07	7.14E-06	414	374	401	166	181	166	2.829825072	2.853664357	2.989158202	1.606005476	1.676766544	1.467514326	Zik1	ENSMUSG00000030393	22775	zinc finger protein interacting with K protein 1
ENSMUSG00000049988.4	chr8	70616155	70620890	+	Lrrc25	1.004767268	5.09E-07	7.14E-06	734	724	693	1584	1564	1470	3.655215461	3.805684328	3.777654097	4.856439053	4.784426749	4.610227028	Lrrc25	ENSMUSG00000049988	211228	leucine rich repeat containing 25
ENSMUSG00000030557.17	chr7	67231163	67372858	-	Mef2a	0.894138549	5.11E-07	7.16E-06	5727	4678	4858	9413	9172	11850	6.618286619	6.496672787	6.586197278	7.427142619	7.33604009	7.62079627	Mef2a	ENSMUSG00000030557	17258	myocyte enhancer factor 2A
ENSMUSG00000013936.12	chr5	122100951	122113472	+	Myl2	-4.528228108	5.12E-07	7.17E-06	52	55	64	1	3	3	-0.151157702	0.099258315	0.35112928	-5.188410391	-4.019704272	-4.104509119	Myl2	ENSMUSG00000013936	17906	myosin, light polypeptide 2, regulatory, cardiac, slow
ENSMUSG00000025245.13	chr9	123694416	123717625	-	Lztfl1	0.850375997	5.13E-07	7.17E-06	1176	1081	985	1847	2210	2201	4.334882386	4.383660399	4.284614085	5.077985758	5.283097825	5.192407088	Lztfl1	ENSMUSG00000025245	93730	leucine zipper transcription factor-like 1
ENSMUSG00000096947.1	chr12	100208988	100209814	-	Gm26723	1.548586894	5.13E-07	7.18E-06	185	154	138	417	552	529	1.669872157	1.576305477	1.45364419	2.932259496	3.28277146	3.136622833	NA	NA	NA	NA
ENSMUSG00000023909.3	chr17	23736186	23740330	-	Paqr4	-0.98066029	5.15E-07	7.20E-06	1478	1320	1387	779	669	825	4.664515309	4.671711035	4.77817408	3.833032321	3.559881051	3.777260364	Paqr4	ENSMUSG00000023909	76498	progestin and adipoQ receptor family member IV
ENSMUSG00000035969.15	chr4	43381979	43427088	+	Rusc2	1.173564628	5.20E-07	7.25E-06	997	929	844	2204	1897	2625	4.096769812	4.165153504	4.061855637	5.33286287	5.062824976	5.446512439	Rusc2	ENSMUSG00000035969	100213	RUN and SH3 domain containing 2
ENSMUSG00000022679.13	chr16	13903161	13949619	+	Mpv17l	1.288894079	5.21E-07	7.26E-06	184	154	137	377	426	437	1.662073787	1.576305477	1.443189833	2.786959943	2.909342737	2.861275166	Mpv17l	ENSMUSG00000022679	93734	Mpv17 transgene, kidney disease mutant-like
ENSMUSG00000001020.8	chr3	90603771	90606045	+	S100a4	0.788258748	5.27E-07	7.34E-06	47711	44449	39495	73753	87058	82237	9.676646204	9.744722019	9.60930269	10.397051	10.58263835	10.41564475	S100a4	ENSMUSG00000001020	20198	S100 calcium binding protein A4
ENSMUSG00000024736.14	chr19	10857822	10869940	-	Tmem132a	-0.952582358	5.28E-07	7.34E-06	1035	924	970	550	495	574	4.150708619	4.157371958	4.262486427	3.331225862	3.125682053	3.254299042	Tmem132a	ENSMUSG00000024736	98170	transmembrane protein 132A
ENSMUSG00000022994.8	chr15	98589994	98607633	-	Adcy6	2.783288771	5.29E-07	7.35E-06	35	30	24	234	243	189	-0.7156561	-0.764420214	-1.045388132	2.100071221	2.100718768	1.654189997	Adcy6	ENSMUSG00000022994	11512	adenylate cyclase 6
ENSMUSG00000057948.12	chr11	116062095	116077961	-	Unc13d	-2.830652946	5.34E-07	7.41E-06	112	115	128	19	17	16	0.948377972	1.15659149	1.345526573	-1.487970673	-1.697776177	-1.867469921	Unc13d	ENSMUSG00000057948	70450	unc-13 homolog D (C. elegans)
ENSMUSG00000098626.1	chr14	61648638	61648774	+	Gm27972	-2.538666652	5.35E-07	7.42E-06	233	156	151	32	30	35	2.00187552	1.594861296	1.583076008	-0.751005078	-0.896321857	-0.762116921	NA	NA	NA	NA
ENSMUSG00000032086.12	chr9	45838580	45864399	+	Bace1	0.847042638	5.38E-07	7.45E-06	836	751	831	1468	1524	1655	3.842818511	3.858471743	4.039474478	4.746754659	4.747061241	4.781187255	Bace1	ENSMUSG00000032086	23821	beta-site APP cleaving enzyme 1
ENSMUSG00000034795.14	chr14	77036772	77112257	+	Ccdc122	-1.306443177	5.39E-07	7.46E-06	551	461	399	184	199	224	3.241813856	3.155029287	2.981953717	1.754104115	1.813185742	1.898707594	Ccdc122	ENSMUSG00000034795	108811	coiled-coil domain containing 122
ENSMUSG00000000552.9	chr15	103313895	103340086	-	Zfp385a	-1.236765855	5.50E-07	7.61E-06	1235	1085	1232	557	454	607	4.405476076	4.388986459	4.607273956	3.349455103	3.00107729	3.334876558	Zfp385a	ENSMUSG00000000552	29813	zinc finger protein 385A
ENSMUSG00000032436.16	chr9	114756837	114781993	-	Cmtm7	0.641761835	5.50E-07	7.61E-06	2842	2726	2588	4314	4512	4784	5.607541414	5.717676889	5.677802627	6.301604771	6.312652022	6.312288409	Cmtm7	ENSMUSG00000032436	102545	CKLF-like MARVEL transmembrane domain containing 7
ENSMUSG00000002325.14	chr14	55603571	55610030	+	Irf9	-0.684918625	5.61E-07	7.74E-06	3431	3131	2800	1997	2080	2135	5.87922042	5.917480612	5.791370737	5.190606896	5.195655379	5.148494142	Irf9	ENSMUSG00000002325	16391	interferon regulatory factor 9
ENSMUSG00000038366.15	chr11	97799000	97838764	+	Lasp1	0.748652602	5.61E-07	7.74E-06	5227	4474	4352	8152	7687	9434	6.486502222	6.432353212	6.427530607	7.219653929	7.081239596	7.291866305	Lasp1	ENSMUSG00000038366	16796	LIM and SH3 protein 1
ENSMUSG00000035992.15	chr11	54438199	54518235	+	Fnip1	-0.801483653	5.62E-07	7.75E-06	2599	2048	2095	1339	1405	1375	5.478615221	5.305194626	5.37298083	4.614105974	4.629808544	4.513876383	Fnip1	ENSMUSG00000035992	216742	folliculin interacting protein 1
ENSMUSG00000046186.8	chr9	78615546	78716253	+	Cd109	-0.740286836	5.63E-07	7.76E-06	6519	5441	5666	3447	4017	3811	6.805142389	6.714631132	6.808144217	5.977961945	6.145023114	5.98427912	Cd109	ENSMUSG00000046186	235505	CD109 antigen
ENSMUSG00000029022.18	chr4	147860778	147868816	-	Miip	-0.996321741	5.65E-07	7.78E-06	1702	1585	1435	859	896	779	4.868035864	4.935564611	4.827239639	3.973980938	3.981100579	3.694541172	Miip	ENSMUSG00000029022	28010	migration and invasion inhibitory protein
ENSMUSG00000040616.3	chr4	142030992	142084304	-	Tmem51	0.88325811	5.66E-07	7.78E-06	858	805	782	1614	1465	1752	3.880271105	3.958583228	3.951848966	4.883498834	4.690118058	4.863334688	Tmem51	ENSMUSG00000040616	214359	transmembrane protein 51
ENSMUSG00000020120.15	chr11	16971206	17052381	-	Plek	0.709551855	5.67E-07	7.79E-06	20227	16430	16684	27938	31841	33366	8.438627183	8.308931212	8.366122856	8.996594054	9.131561486	9.114248701	Plek	ENSMUSG00000020120	56193	pleckstrin
ENSMUSG00000041216.15	chr4	9269293	9451691	+	Clvs1	1.309699116	5.68E-07	7.80E-06	169	176	188	446	476	487	1.539738244	1.768366822	1.898322738	3.029143474	3.06927321	3.017394368	Clvs1	ENSMUSG00000041216	74438	clavesin 1
ENSMUSG00000030774.13	chr7	97788541	97912381	+	Pak1	0.655893043	5.74E-07	7.87E-06	6540	5704	5588	9460	9488	11121	6.809781995	6.782727173	6.788147413	7.434327827	7.384905126	7.529199722	Pak1	ENSMUSG00000030774	18479	p21 protein (Cdc42/Rac)-activated kinase 1
ENSMUSG00000063275.15	chr2	13850282	14056135	-	Hacd1	3.383546936	5.75E-07	7.87E-06	24	16	13	191	238	171	-1.250693375	-1.650763432	-1.905210474	1.807827691	2.070786262	1.510200725	Hacd1	ENSMUSG00000063275	30963	3-hydroxyacyl-CoA dehydratase 1
ENSMUSG00000035266.16	chr5	100762145	100798598	-	Helq	-0.983055656	5.81E-07	7.95E-06	1022	966	904	511	559	496	4.132481909	4.221468371	4.160878717	3.225217538	3.300935127	3.043785867	Helq	ENSMUSG00000035266	191578	helicase, POLQ-like
ENSMUSG00000045763.7	chr15	25363285	25413764	-	Basp1	-1.131484301	5.81E-07	7.95E-06	806	846	820	376	425	404	3.790127504	4.030208707	4.020261548	2.783133163	2.905956127	2.748131852	Basp1	ENSMUSG00000045763	70350	brain abundant, membrane attached signal protein 1
ENSMUSG00000037890.13	chr5	65199696	65260415	+	Wdr19	1.024870308	5.85E-07	8.00E-06	364	322	311	743	678	750	2.644371785	2.637997799	2.622990377	3.764816041	3.579145811	3.639844221	Wdr19	ENSMUSG00000037890	213081	WD repeat domain 19
ENSMUSG00000068129.5	chr2	150570415	150578944	+	Cst7	1.245031684	5.87E-07	8.01E-06	258	235	222	519	606	696	2.148617251	2.184425698	2.13756355	3.247607047	3.417304641	3.532115502	Cst7	ENSMUSG00000068129	13011	cystatin F (leukocystatin)
ENSMUSG00000006763.14	chr7	46686108	46710680	-	Saal1	-0.747948463	5.88E-07	8.01E-06	1495	1317	1315	805	896	926	4.681008976	4.668429695	4.701297557	3.880367887	3.981100579	3.943783125	Saal1	ENSMUSG00000006763	78935	serum amyloid A-like 1
ENSMUSG00000021556.11	chr13	59634996	59675784	-	Golm1	-0.679756187	5.89E-07	8.01E-06	3156	2815	2635	1823	1978	1935	5.758706816	5.764017884	5.703763001	5.059121593	5.123132156	5.006626551	Golm1	ENSMUSG00000021556	105348	golgi membrane protein 1
ENSMUSG00000033904.16	chr7	118712552	118737024	+	Ccp110	-0.880675059	5.89E-07	8.01E-06	1617	1390	1357	732	903	903	4.794146778	4.746230478	4.746638507	3.743312058	3.992321597	3.90751675	Ccp110	ENSMUSG00000033904	101565	centriolar coiled coil protein 110
ENSMUSG00000037625.7	chr3	31149920	31164324	+	Cldn11	-1.994163531	5.89E-07	8.01E-06	568	572	492	157	102	190	3.28561332	3.465974332	3.283881939	1.525835127	0.852420905	1.661783147	Cldn11	ENSMUSG00000037625	18417	claudin 11
ENSMUSG00000019564.12	chr10	79927043	79955018	+	Arid3a	-0.895020472	5.94E-07	8.06E-06	1761	1587	1560	943	996	886	4.91718554	4.937383325	4.947694666	4.108505816	4.133666801	3.88011278	Arid3a	ENSMUSG00000019564	13496	AT rich interactive domain 3A (BRIGHT-like)
ENSMUSG00000040883.15	chr9	21921010	21927535	-	Tmem205	0.982668633	5.94E-07	8.06E-06	686	727	672	1466	1493	1441	3.557712691	3.811645887	3.733292482	4.744788464	4.717422328	4.581491081	Tmem205	ENSMUSG00000040883	235043	transmembrane protein 205
ENSMUSG00000026854.16	chr2	30982279	31023586	+	Usp20	0.767169059	5.96E-07	8.08E-06	1621	1477	1461	2852	2658	2786	4.797710089	4.833784864	4.853136138	5.70463828	5.549337557	5.532374397	Usp20	ENSMUSG00000026854	74270	ubiquitin specific peptidase 20
ENSMUSG00000032059.13	chr9	50775019	50843542	+	Alg9	0.816292964	6.04E-07	8.19E-06	892	803	754	1439	1627	1545	3.93630514	3.954996663	3.899279115	4.717979182	4.841382634	4.681993898	Alg9	ENSMUSG00000032059	102580	asparagine-linked glycosylation 9 (alpha 1,2 mannosyltransferase)
ENSMUSG00000034783.7	chr6	83671215	83677857	-	Cd207	3.101310618	6.13E-07	8.30E-06	11	7	11	93	83	98	-2.341841263	-2.788266956	-2.13653602	0.773521568	0.556645098	0.710187779	Cd207	ENSMUSG00000034783	246278	CD207 antigen
ENSMUSG00000050912.15	chr9	7764041	7794333	+	Tmem123	0.715094748	6.16E-07	8.33E-06	5193	4235	4342	7404	7749	9017	6.477088192	6.353159023	6.424212158	7.080813712	7.092828321	7.226647762	Tmem123	ENSMUSG00000050912	71929	transmembrane protein 123
ENSMUSG00000065870.2	chr10	40258467	40258680	+	Rnu3a	-1.246838091	6.16E-07	8.33E-06	4446	3295	2960	1555	1739	1477	6.253051251	5.991124104	5.871527163	4.829789788	4.937397769	4.617078374	Rnu3a	NA	19850	U3A small nuclear RNA
ENSMUSG00000106147.1	chr10	40258467	40258679	+	Rnu3a	-1.246313455	6.17E-07	8.33E-06	4444	3294	2959	1555	1739	1477	6.252402192	5.99068626	5.871039766	4.829789788	4.937397769	4.617078374	Rnu3a	NA	19850	U3A small nuclear RNA
ENSMUSG00000000253.12	chr13	45507444	45546382	+	Gmpr	0.902810958	6.20E-07	8.37E-06	758	756	719	1528	1404	1533	3.701602151	3.868038721	3.830752901	4.804527945	4.628781715	4.67074841	Gmpr	ENSMUSG00000000253	66355	guanosine monophosphate reductase
ENSMUSG00000022960.12	chr16	91677268	91688765	-	Donson	-0.790292367	6.21E-07	8.37E-06	1880	1602	1568	932	1026	1166	5.011497372	4.95095109	4.955071838	4.091587024	4.176458718	4.276106551	Donson	ENSMUSG00000022960	60364	downstream neighbor of SON
ENSMUSG00000005514.14	chr5	135670033	135735326	+	Por	1.00079923	6.23E-07	8.39E-06	5133	4387	4364	9578	8523	11812	6.46032385	6.404025859	6.431502696	7.45221114	7.230171055	7.616162668	Por	ENSMUSG00000005514	18984	P450 (cytochrome) oxidoreductase
ENSMUSG00000062075.13	chr10	80901203	80918245	-	Lmnb2	-0.770799348	6.25E-07	8.41E-06	4074	3724	3467	2349	2446	2260	6.127004096	6.167673496	6.099582191	5.424765161	5.429444373	5.230562161	Lmnb2	ENSMUSG00000062075	16907	lamin B2
ENSMUSG00000034295.9	chr18	24709445	25133500	+	Fhod3	3.968150866	6.27E-07	8.43E-06	11	4	6	121	98	135	-2.341841263	-3.52523255	-2.959658258	1.151439612	0.794992625	1.170285001	Fhod3	ENSMUSG00000034295	225288	formin homology 2 domain containing 3
ENSMUSG00000052435.6	chr14	54710363	54712174	-	Cebpe	-1.304887336	6.27E-07	8.43E-06	470	411	442	194	203	176	3.012647693	2.989591069	3.129435669	1.830253454	1.84182579	1.551660332	Cebpe	ENSMUSG00000052435	110794	CCAAT/enhancer binding protein (C/EBP), epsilon
ENSMUSG00000022814.6	chr16	33954782	33967038	-	Umps	-0.641963552	6.37E-07	8.55E-06	4054	3750	3454	2426	2631	2650	6.119905078	6.177709676	6.094163221	5.471288253	5.534610485	5.460184784	Umps	ENSMUSG00000022814	22247	uridine monophosphate synthetase
ENSMUSG00000052609.8	chr12	76533560	76579039	+	Plekhg3	-0.969912388	6.42E-07	8.61E-06	1567	1445	1484	785	901	774	4.748846508	4.802195342	4.875663402	3.844094574	3.989124487	3.685257388	Plekhg3	ENSMUSG00000052609	263406	pleckstrin homology domain containing, family G (with RhoGef domain) member 3
ENSMUSG00000061607.14	chr17	35841515	35859670	+	Mdc1	-0.815005626	6.43E-07	8.61E-06	4866	3980	4150	2566	2373	2965	6.38326562	6.263576396	6.358971454	5.552213654	5.38574114	5.622195616	Mdc1	ENSMUSG00000061607	240087	mediator of DNA damage checkpoint 1
ENSMUSG00000037946.11	chr13	49261554	49320311	-	Fgd3	0.642651622	6.45E-07	8.63E-06	3667	3203	3244	5413	5799	5655	5.975178031	5.950275724	6.003682475	6.628973037	6.674653615	6.553574822	Fgd3	ENSMUSG00000037946	30938	FYVE, RhoGEF and PH domain containing 3
ENSMUSG00000041187.16	chr7	16842902	16870464	+	Prkd2	-0.908122242	6.56E-07	8.77E-06	1448	1369	1372	791	837	761	4.63494075	4.724276	4.762492458	3.855072649	3.882886186	3.660836186	Prkd2	ENSMUSG00000041187	101540	protein kinase D2
ENSMUSG00000037995.15	chr1	172481788	172498878	+	Igsf9	-4.723638807	6.61E-07	8.83E-06	92	62	74	1	5	3	0.665978241	0.270626734	0.559070545	-5.188410391	-3.367627576	-4.104509119	Igsf9	ENSMUSG00000037995	93842	immunoglobulin superfamily, member 9
ENSMUSG00000041362.16	chr19	58973358	59076069	-	Shtn1	0.675156977	6.61E-07	8.83E-06	4840	4541	4260	7281	7386	8675	6.375537144	6.453795614	6.39670906	7.056647072	7.023616014	7.170867152	Shtn1	ENSMUSG00000041362	71653	shootin 1
ENSMUSG00000032399.7	chr9	64173387	64178562	+	Rpl4	0.663043127	6.64E-07	8.86E-06	99986	93788	91283	150748	167038	165239	10.74404248	10.82196586	10.81796851	11.42841123	11.52276194	11.42233503	Rpl4	ENSMUSG00000032399	67891	ribosomal protein L4
ENSMUSG00000036943.8	chr9	66843672	66919705	-	Rab8b	0.902639064	6.66E-07	8.88E-06	5093	4364	4069	8230	8216	10704	6.449038411	6.396443121	6.330537857	7.23339147	7.177249067	7.474065749	Rab8b	ENSMUSG00000036943	235442	RAB8B, member RAS oncogene family
ENSMUSG00000026879.14	chr2	35256380	35307892	+	Gsn	0.827525137	6.71E-07	8.94E-06	4558	4441	4089	8079	8867	7902	6.288940241	6.421673725	6.337610773	7.206677408	7.287252515	7.036229374	Gsn	ENSMUSG00000026879	227753	gelsolin
ENSMUSG00000024639.5	chr19	16132831	16387463	+	Gnaq	0.850987272	6.74E-07	8.96E-06	1319	1251	1355	2499	2540	2522	4.500372416	4.594285025	4.744511422	5.51405092	5.483837554	5.388774513	Gnaq	ENSMUSG00000024639	14682	guanine nucleotide binding protein, alpha q polypeptide
ENSMUSG00000080316.10	chr17	17830719	17843009	+	Spaca6	0.764738267	6.74E-07	8.96E-06	898	816	817	1403	1521	1680	3.945971474	3.978151524	4.014976945	4.681440457	4.744219424	4.802810786	Spaca6	ENSMUSG00000080316	75202	sperm acrosome associated 6
ENSMUSG00000086421.1	chr2	118829874	118834122	-	Gm14091	-2.184208689	6.75E-07	8.96E-06	292	289	261	45	87	71	2.326889595	2.482261987	2.370569161	-0.265578251	0.624151918	0.248007296	NA	NA	NA	NA
ENSMUSG00000096243.1	chr5	115489459	115489599	+	Gm24265	-1.116565586	6.75E-07	8.96E-06	2480	2856	2625	1311	1308	1298	5.411012023	5.784875263	5.698278505	4.583629201	4.526639015	4.430766258	NA	NA	NA	NA
ENSMUSG00000043153.5	chr12	36381519	36689444	+	Ispd	3.063848362	6.76E-07	8.97E-06	9	8	10	72	84	97	-2.617475706	-2.60769471	-2.267780553	0.406536199	0.573820242	0.695466273	Ispd	ENSMUSG00000043153	75847	isoprenoid synthase domain containing
ENSMUSG00000022102.13	chr14	70766036	70778495	+	Dok2	0.591270468	6.79E-07	9.00E-06	6094	5675	5306	8648	9217	9636	6.707888931	6.77537423	6.713446927	7.304861326	7.343100602	7.322429495	Dok2	ENSMUSG00000022102	13449	docking protein 2
ENSMUSG00000042675.15	chr7	126776955	126780514	+	Ypel3	-0.9690082	6.79E-07	9.00E-06	920	884	784	485	436	492	3.980870692	4.093560782	3.955531661	3.149954594	2.942778649	3.032115874	Ypel3	ENSMUSG00000042675	66090	yippee like 3
ENSMUSG00000033589.3	chr14	70545251	70548933	+	Reep4	-0.845604846	6.82E-07	9.02E-06	2701	2525	2254	1508	1332	1614	5.534141747	5.607195775	5.478493819	4.78552609	4.552860623	4.745007685	Reep4	ENSMUSG00000033589	72549	receptor accessory protein 4
ENSMUSG00000049932.3	chr9	44334694	44336077	+	H2afx	-0.99783004	6.92E-07	9.14E-06	4123	4675	3903	2260	2138	2390	6.144250473	6.495747389	6.270454579	5.369053311	5.235324298	5.31123265	H2afx	ENSMUSG00000049932	15270	H2A histone family, member X
ENSMUSG00000022123.8	chr14	103513341	103613346	+	Scel	-2.51147195	6.98E-07	9.22E-06	309	284	234	71	35	54	2.40839238	2.457127291	2.213346137	0.386498445	-0.677312075	-0.143679716	Scel	ENSMUSG00000022123	64929	sciellin
ENSMUSG00000106200.1	chr13	51202698	51202835	+	Gm44341	-1.237972529	7.05E-07	9.31E-06	863	919	700	368	372	378	3.888649148	4.149548213	3.792143265	2.752147918	2.714037421	2.652285449	NA	NA	NA	NA
ENSMUSG00000005267.13	chr11	62700356	62731905	-	Zfp287	0.825476319	7.07E-07	9.32E-06	560	538	524	991	1000	1082	3.265167344	3.377644983	3.374700987	4.180096071	4.139446258	4.168287269	Zfp287	ENSMUSG00000005267	170740	zinc finger protein 287
ENSMUSG00000044816.10	chr1	65105285	65123214	-	D630023F18Rik	-0.941865436	7.17E-07	9.45E-06	5873	4796	5240	2726	2659	3509	6.654601522	6.532608791	6.695390776	5.639461549	5.549880127	5.865185748	D630023F18Rik	ENSMUSG00000044816	98303	RIKEN cDNA D630023F18 gene
ENSMUSG00000024158.17	chr17	24840143	24864450	+	Hagh	0.61244281	7.18E-07	9.45E-06	2361	2151	2011	3380	3486	3792	5.340084601	5.375969574	5.313958047	5.94964804	5.940504572	5.977069424	Hagh	ENSMUSG00000024158	14651	hydroxyacyl glutathione hydrolase
ENSMUSG00000052459.13	chr16	44085402	44139705	-	Atp6v1a	0.625418912	7.23E-07	9.51E-06	8769	7872	7560	12453	13910	13539	7.232875654	7.247448586	7.224167957	7.83089075	7.936827462	7.813022801	Atp6v1a	ENSMUSG00000052459	11964	ATPase, H+ transporting, lysosomal V1 subunit A
ENSMUSG00000022602.14	chr15	74669083	74672570	-	Arc	-1.127383478	7.25E-07	9.52E-06	613	607	565	308	284	282	3.395516314	3.551583047	3.483285238	2.495753788	2.325225648	2.230243016	Arc	ENSMUSG00000022602	11838	activity regulated cytoskeletal-associated protein
ENSMUSG00000069755.5	chr12	20877084	20921262	-	Zfp125	5.160915667	7.31E-07	9.59E-06	1	1	3	52	86	95	-5.280440719	-5.11019505	-3.852743054	-0.059127374	0.607569033	0.665564787	Zfp125	NA	22651	zinc finger protein 125
ENSMUSG00000031278.12	chrX	142317993	142390535	-	Acsl4	0.810648638	7.35E-07	9.64E-06	5480	4689	4626	8055	9072	10748	6.554688585	6.500060843	6.5156075	7.202385532	7.320225242	7.479983678	Acsl4	ENSMUSG00000031278	50790	acyl-CoA synthetase long-chain family member 4
ENSMUSG00000053063.11	chr6	129342691	129365303	+	Clec12a	-0.908441588	7.36E-07	9.65E-06	1857	1793	1697	887	1121	1048	4.993743276	5.113404479	5.069097883	4.020230418	4.304154711	4.122247105	Clec12a	ENSMUSG00000053063	232413	C-type lectin domain family 12, member a
ENSMUSG00000098711.1	chr5	100429101	100429238	+	Gm28030	-1.191167405	7.41E-07	9.71E-06	589	533	479	217	281	253	3.337944784	3.36418691	3.245289029	1.991498699	2.309931918	2.073977896	NA	NA	NA	NA
ENSMUSG00000038170.15	chr3	97689824	97888707	-	Pde4dip	0.983117397	7.42E-07	9.71E-06	4533	4066	4066	8011	8075	10952	6.28100635	6.294414347	6.329473923	7.194483778	7.152276678	7.507108553	Pde4dip	ENSMUSG00000038170	83679	phosphodiesterase 4D interacting protein (myomegalin)
ENSMUSG00000019132.10	chr13	24801657	24814013	+	BC005537	0.739850411	7.46E-07	9.75E-06	32949	27225	28538	49547	49220	59861	9.142565733	9.037513373	9.140523912	9.823151754	9.759912499	9.957476769	BC005537	ENSMUSG00000019132	79555	cDNA sequence BC005537
ENSMUSG00000027496.15	chr2	172356190	172370535	-	Aurka	-0.800138629	7.48E-07	9.77E-06	5087	4870	4158	2921	2901	2822	6.447337955	6.554696619	6.361749541	5.739120683	5.675524019	5.550893825	Aurka	ENSMUSG00000027496	20878	aurora kinase A
ENSMUSG00000021281.15	chr12	111442469	111455018	+	Tnfaip2	0.719547872	7.52E-07	9.81E-06	5936	5734	5502	10042	10326	9868	6.669993673	6.790294434	6.765773549	7.52045795	7.507004544	7.356751057	Tnfaip2	ENSMUSG00000021281	21928	tumor necrosis factor, alpha-induced protein 2
ENSMUSG00000006362.16	chr8	122625141	122699109	-	Cbfa2t3	-3.320116628	7.54E-07	9.82E-06	117	112	119	15	7	16	1.011113727	1.11862364	1.240768832	-1.819176581	-2.920168599	-1.867469921	Cbfa2t3	ENSMUSG00000006362	12398	core-binding factor, runt domain, alpha subunit 2, translocated to, 3 (human)
ENSMUSG00000035473.10	chr17	80127471	80185101	+	Galm	1.44722855	7.53E-07	9.82E-06	270	197	209	626	571	779	2.214081565	1.930551292	2.050708458	3.517797808	3.331550494	3.694541172	Galm	ENSMUSG00000035473	319625	galactose mutarotase
ENSMUSG00000030137.8	chr6	121210696	121226854	+	Tuba8	-4.02436176	7.55E-07	9.83E-06	99	97	103	9	3	8	0.771221401	0.912172763	1.033388982	-2.525445378	-4.019704272	-2.8244012	Tuba8	ENSMUSG00000030137	53857	tubulin, alpha 8
ENSMUSG00000032042.11	chr9	35200175	35247973	+	Srpr	1.024074164	7.57E-07	9.85E-06	9215	7776	7464	16661	15329	21564	7.304443509	7.229747715	7.205731935	8.250857778	8.076963827	8.484506604	Srpr	ENSMUSG00000032042	67398	signal recognition particle receptor ('docking protein')
ENSMUSG00000042216.13	chr5	113243220	113310786	-	Sgsm1	0.971622455	7.79E-07	1.01E-05	573	578	555	1156	1263	1159	3.298246457	3.481015598	3.457545126	4.402176659	4.476150755	4.267423064	Sgsm1	ENSMUSG00000042216	52850	small G protein signaling modulator 1
ENSMUSG00000050953.9	chr10	56377300	56390419	+	Gja1	0.879008422	7.84E-07	1.02E-05	1151	904	928	1994	1788	2073	4.303895476	4.125819142	4.198660124	5.188438517	4.977475209	5.105988291	Gja1	ENSMUSG00000050953	14609	gap junction protein, alpha 1
ENSMUSG00000025925.14	chr1	15805646	15844052	+	Terf1	-0.948938994	7.88E-07	1.02E-05	656	551	578	308	326	353	3.493247982	3.412059524	3.516075173	2.495753788	2.523879987	2.553702364	Terf1	ENSMUSG00000025925	21749	telomeric repeat binding factor 1
ENSMUSG00000060639.5	chr13	22040636	22041362	-	Hist1h4i	-2.26242226	8.02E-07	1.04E-05	222	231	193	63	39	44	1.932258307	2.159710832	1.93609178	0.215311795	-0.523278446	-0.43613061	Hist1h4i	ENSMUSG00000060639	319158	histone cluster 1, H4i
ENSMUSG00000031266.6	chrX	134588149	134601125	-	Gla	-0.810247133	8.05E-07	1.04E-05	1266	1188	1140	652	758	784	4.441228142	4.519768637	4.495352756	3.5764612	3.739946176	3.703765596	Gla	ENSMUSG00000031266	11605	galactosidase, alpha
ENSMUSG00000032401.15	chr9	64117147	64138118	+	Lctl	-1.316609805	8.06E-07	1.04E-05	1144	818	840	371	351	478	4.295098528	3.981681055	4.055006034	2.763845509	2.630321685	2.990511074	Lctl	ENSMUSG00000032401	235435	lactase-like
ENSMUSG00000058325.6	chr7	134670654	135173639	+	Dock1	-0.773630513	8.11E-07	1.05E-05	1544	1396	1378	917	892	891	4.727520936	4.752442307	4.768785576	4.068191456	3.974649165	3.888226947	Dock1	ENSMUSG00000058325	330662	dedicator of cytokinesis 1
ENSMUSG00000069307.5	chr13	21806412	21810199	-	Hist1h2bq	-1.926104765	8.15E-07	1.05E-05	189	216	181	54	53	56	1.700650819	2.063065664	1.843727762	-0.005188567	-0.085592208	-0.091685078	Hist1h2bq	ENSMUSG00000069307	665596	histone cluster 1, H2bq
ENSMUSG00000048012.19	chr7	44731480	44751050	-	Zfp473	-1.855365406	8.17E-07	1.05E-05	217	196	206	47	62	75	1.899468371	1.923227951	2.029899996	-0.203517283	0.13872509	0.326540698	Zfp473	ENSMUSG00000048012	243963	zinc finger protein 473
ENSMUSG00000107092.1	chr5	95974240	95975623	+	Gm7993	1.652976151	8.23E-07	1.06E-05	4530	4314	3913	13194	11123	19841	6.280051345	6.379820111	6.274145754	7.91427617	7.614263988	8.364369435	Gm7993	NA	666231	ornithine decarboxylase, structural 1 pseudogene
ENSMUSG00000030722.7	chr7	126382854	126396737	-	Nfatc2ip	-1.213996585	8.26E-07	1.06E-05	496	417	402	212	205	189	3.090246688	3.010474836	2.992746997	1.95794614	1.855935389	1.654189997	Nfatc2ip	ENSMUSG00000030722	18020	nuclear factor of activated T cells, cytoplasmic, calcineurin dependent 2 interacting protein
ENSMUSG00000026872.17	chr2	44983632	45117395	-	Zeb2	0.837032988	8.27E-07	1.07E-05	10123	8264	9054	16112	16153	20310	7.44001732	7.317554273	7.484321285	8.202519847	8.152499975	8.398074095	Zeb2	ENSMUSG00000026872	24136	zinc finger E-box binding homeobox 2
ENSMUSG00000007815.13	chr9	108306129	108337934	+	Rhoa	0.709782983	8.32E-07	1.07E-05	8129	6958	7027	11863	13905	12905	7.123547688	7.06940308	7.118697858	7.760869188	7.936308806	7.743834376	Rhoa	ENSMUSG00000007815	11848	ras homolog family member A
ENSMUSG00000031827.13	chr8	119809222	119840544	-	Cotl1	-0.94114712	8.34E-07	1.07E-05	5818	5575	5271	3076	2666	3600	6.641028342	6.749727922	6.703899847	5.813701386	5.553672418	5.902117511	Cotl1	ENSMUSG00000031827	72042	coactosin-like 1 (Dictyostelium)
ENSMUSG00000043259.14	chr10	70440668	70558731	+	Fam13c	-1.449094589	8.36E-07	1.07E-05	613	443	530	181	192	247	3.395516314	3.097632743	3.391110965	1.730452847	1.761655441	2.039420674	Fam13c	ENSMUSG00000043259	71721	family with sequence similarity 13, member C
ENSMUSG00000060791.15	chr7	28437447	28448233	+	Gmfg	-1.622931364	8.36E-07	1.07E-05	464	386	389	169	147	119	2.994131567	2.899167053	2.945381542	1.631768572	1.37751195	0.989002767	Gmfg	ENSMUSG00000060791	63986	glia maturation factor, gamma
ENSMUSG00000110040.1	chr7	142371096	142382667	-	RP23-145I16.3	1.02374075	8.36E-07	1.07E-05	31419	27571	26201	58251	53079	75567	9.073969382	9.055732586	9.01726381	10.05663469	9.868807966	10.29361423	NA	NA	NA	NA
ENSMUSG00000061615.2	chr13	23751126	23751598	+	Hist1h2ab	-2.866227711	8.38E-07	1.07E-05	173	148	115	17	29	18	1.573388633	1.51916157	1.191651066	-1.644089874	-0.944416145	-1.702410675	Hist1h2ab	ENSMUSG00000061615	319172	histone cluster 1, H2ab
ENSMUSG00000064032.2	chr19	10198368	10202384	+	Gm10143	-1.226128169	8.37E-07	1.07E-05	3851	3956	3481	1701	1993	1500	6.045801491	6.254851491	6.105395332	4.959218545	5.134028696	4.639363563	Gm10143	NA	100038753	predicted gene 10143
ENSMUSG00000058444.7	chr9	63163769	63377902	-	Map2k5	0.725117276	8.41E-07	1.08E-05	1003	875	908	1631	1592	1698	4.105421682	4.078805817	4.167244728	4.898610381	4.810018463	4.818181462	Map2k5	ENSMUSG00000058444	23938	mitogen-activated protein kinase kinase 5
ENSMUSG00000020806.15	chr11	116598165	116627019	-	Rhbdf2	0.642120181	8.42E-07	1.08E-05	8156	6959	6992	12273	11493	13091	7.128331282	7.069610394	7.111494658	7.809886205	7.66147138	7.764478747	Rhbdf2	ENSMUSG00000020806	217344	rhomboid 5 homolog 2
ENSMUSG00000063851.12	chr4	62427540	62435252	-	Rnf183	1.00116527	8.49E-07	1.08E-05	348	280	294	661	621	690	2.579611627	2.436699409	2.542025848	3.596224455	3.452551387	3.519633563	Rnf183	ENSMUSG00000063851	76072	ring finger protein 183
ENSMUSG00000026896.14	chr2	62595798	62646255	-	Ifih1	-0.852279649	8.50E-07	1.08E-05	963	885	830	527	537	521	4.046737637	4.095190946	4.037738382	3.269654392	3.24306175	3.114659402	Ifih1	ENSMUSG00000026896	71586	interferon induced with helicase C domain 1
ENSMUSG00000027171.10	chr2	104830741	104849876	-	Prrg4	-0.587246876	8.55E-07	1.09E-05	6656	5619	5733	4025	4203	4574	6.83514487	6.761068505	6.825102406	6.201579382	6.210316163	6.247534307	Prrg4	ENSMUSG00000027171	228413	proline rich Gla (G-carboxyglutamic acid) 4 (transmembrane)
ENSMUSG00000078249.5	chr11	120762794	120764419	+	Hmga1-rs1	0.761041925	8.58E-07	1.09E-05	2028	2036	1958	3365	3828	3729	5.120794368	5.296718548	5.275435437	5.94323225	6.075504348	5.952902471	Hmga1b	ENSMUSG00000078249	111241	high mobility group AT-hook 1B
ENSMUSG00000019528.18	chr3	20122084	20155317	-	Gyg	-0.669309532	8.61E-07	1.10E-05	2256	1931	1900	1305	1303	1481	5.274467844	5.220348411	5.232065334	4.577013851	4.521115673	4.62097887	Gyg	ENSMUSG00000019528	27357	glycogenin
ENSMUSG00000068855.3	chr3	96220361	96220880	-	Hist2h2ac	-1.176066668	8.65E-07	1.10E-05	2531	2774	2360	1169	1363	1104	5.44037355	5.742854537	5.544778792	4.418303255	4.586039791	4.197313663	Hist2h2ac	ENSMUSG00000068855	319176	histone cluster 2, H2ac
ENSMUSG00000091393.1	chr1	166306741	166309585	-	5330438I03Rik	4.207636501	8.64E-07	1.10E-05	9	7	6	120	138	212	-2.617475706	-2.788266956	-2.959658258	1.139516445	1.286682972	1.81945499	5330438I03Rik	NA	381325	RIKEN cDNA 5330438I03 gene
ENSMUSG00000033335.17	chr9	21424908	21507759	+	Dnm2	0.644013228	8.67E-07	1.10E-05	6774	6267	5974	10643	10581	10519	6.860495536	6.918516825	6.884504289	7.604312132	7.542197339	7.448914473	Dnm2	ENSMUSG00000033335	13430	dynamin 2
ENSMUSG00000054770.16	chr1	57955101	58018956	-	Kctd18	-1.083443772	8.73E-07	1.11E-05	2188	1754	1818	889	844	1191	5.230323449	5.081686681	5.168435235	4.023477904	3.894894418	4.306699195	Kctd18	ENSMUSG00000054770	51960	potassium channel tetramerisation domain containing 18
ENSMUSG00000032204.13	chr9	71110659	71168682	-	Aqp9	-2.628307238	8.76E-07	1.11E-05	177	146	158	31	35	19	1.606271995	1.499599303	1.648241054	-0.796092968	-0.677312075	-1.626461822	Aqp9	ENSMUSG00000032204	64008	aquaporin 9
ENSMUSG00000029570.5	chr5	140607320	140615545	+	Lfng	1.178778069	8.79E-07	1.11E-05	1349	1348	1232	2981	2719	3909	4.532806042	4.701982255	4.607273956	5.76844973	5.582066516	6.020904352	Lfng	ENSMUSG00000029570	16848	LFNG O-fucosylpeptide 3-beta-N-acetylglucosaminyltransferase
ENSMUSG00000046722.14	chr3	95228732	95236409	+	Cdc42se1	0.590493946	8.83E-07	1.12E-05	11718	11144	10628	17173	18128	18631	7.651097073	7.74888672	7.715552408	8.294523582	8.318912743	8.273592167	Cdc42se1	ENSMUSG00000046722	57912	CDC42 small effector 1
ENSMUSG00000017713.9	chr11	117867952	117873481	-	Tha1	1.547967501	8.87E-07	1.12E-05	156	96	125	388	375	403	1.424615628	0.897299486	1.311445578	2.828397897	2.725609903	2.744560822	Tha1	ENSMUSG00000017713	71776	threonine aldolase 1
ENSMUSG00000019806.13	chr10	13647054	13868980	-	Aig1	1.272113812	8.86E-07	1.12E-05	198	180	174	405	487	541	1.767591978	1.800697476	1.78698525	2.890185213	3.102199214	3.168953487	Aig1	ENSMUSG00000019806	66253	androgen-induced 1
ENSMUSG00000034422.14	chr16	35832874	35871544	-	Parp14	-1.032719911	8.87E-07	1.12E-05	2392	2051	1796	1024	1218	1015	5.35889999	5.307305888	5.150875244	4.227331378	4.423831341	4.076110483	Parp14	ENSMUSG00000034422	547253	poly (ADP-ribose) polymerase family, member 14
ENSMUSG00000035107.13	chr16	58408443	58469727	+	Dcbld2	-0.771826144	8.87E-07	1.12E-05	1206	1065	1049	652	725	701	4.371208981	4.362157327	4.375388476	3.5764612	3.67577261	3.542435253	Dcbld2	ENSMUSG00000035107	73379	discoidin, CUB and LCCL domain containing 2
ENSMUSG00000031584.16	chr8	33652523	33698163	+	Gsr	0.700735945	8.91E-07	1.12E-05	3104	2941	2560	4873	5070	4975	5.734741997	5.82717877	5.662111868	6.477369638	6.480853108	6.368761757	Gsr	ENSMUSG00000031584	14782	glutathione reductase
ENSMUSG00000105610.1	chr3	96245826	96245963	-	AC125099.1	-1.405731439	8.91E-07	1.12E-05	410	449	377	172	166	159	2.815835192	3.117019754	2.900234858	1.65707966	1.552319173	1.405548573	NA	NA	NA	NA
ENSMUSG00000032431.6	chr9	114375134	114390675	-	Crtap	1.013507203	9.13E-07	1.15E-05	756	757	623	1492	1648	1465	3.697793053	3.869944527	3.624147774	4.770142325	4.859878977	4.605313212	Crtap	ENSMUSG00000032431	56693	cartilage associated protein
ENSMUSG00000050556.9	chr2	167095969	167190155	-	Kcnb1	-3.175548986	9.13E-07	1.15E-05	287	210	226	15	29	48	2.302014927	2.022518872	2.163269264	-1.819176581	-0.944416145	-0.311951199	Kcnb1	ENSMUSG00000050556	16500	potassium voltage gated channel, Shab-related subfamily, member 1
ENSMUSG00000021025.7	chr12	55489411	55492647	-	Nfkbia	0.796178361	9.16E-07	1.15E-05	8562	7442	7893	14299	13320	16926	7.198413148	7.16641405	7.286351446	8.03030419	7.874301422	8.135132028	Nfkbia	ENSMUSG00000021025	18035	nuclear factor of kappa light polypeptide gene enhancer in B cells inhibitor, alpha
ENSMUSG00000068551.12	chr6	48427697	48445825	-	Zfp467	3.402467736	9.16E-07	1.15E-05	8	10	5	95	77	96	-2.777940378	-2.302840128	-3.200666357	0.804055937	0.449065211	0.680592996	Zfp467	ENSMUSG00000068551	68910	zinc finger protein 467
ENSMUSG00000026158.11	chr1	23366424	23397772	-	Ogfrl1	-0.77945659	9.21E-07	1.15E-05	2333	1944	1996	1159	1273	1481	5.322876533	5.230025968	5.303159381	4.405914213	4.48752405	4.62097887	Ogfrl1	ENSMUSG00000026158	70155	opioid growth factor receptor-like 1
ENSMUSG00000031691.14	chr8	85036915	85057583	+	Tnpo2	-0.579118903	9.21E-07	1.15E-05	10323	9617	8921	6714	6785	7137	7.468241334	7.536288658	7.462972604	6.939691366	6.901180217	6.889339084	Tnpo2	ENSMUSG00000031691	212999	transportin 2 (importin 3, karyopherin beta 2b)
ENSMUSG00000036634.15	chr7	30899176	30914873	-	Mag	-4.526651931	9.20E-07	1.15E-05	110	121	100	6	8	2	0.92249934	1.229654952	0.990953715	-3.072933173	-2.739596353	-4.589935946	Mag	ENSMUSG00000036634	17136	myelin-associated glycoprotein
ENSMUSG00000041609.16	chr5	115648175	115731621	-	Ccdc64	2.305208387	9.18E-07	1.15E-05	44	38	31	178	238	189	-0.389669788	-0.42837101	-0.682818052	1.706407373	2.070786262	1.654189997	Bicdl1	ENSMUSG00000041609	75665	BICD family like cargo adaptor 1
ENSMUSG00000106175.1	chr11	58954983	58955120	-	Gm44313	-1.862173741	9.19E-07	1.15E-05	664	742	570	215	219	153	3.51072217	3.841089665	3.495985101	1.978171168	1.951017935	1.350230805	NA	NA	NA	NA
ENSMUSG00000025647.16	chr9	109038565	109057777	+	Shisa5	1.077528933	9.37E-07	1.17E-05	8468	7226	7120	16955	14263	20732	7.182487517	7.123923812	7.137664859	8.276092817	7.972981221	8.427742431	Shisa5	ENSMUSG00000025647	66940	shisa family member 5
ENSMUSG00000037894.13	chr3	137864487	137866922	+	H2afz	-0.762318999	9.41E-07	1.17E-05	4687	4477	4132	2768	2938	2677	6.329199756	6.433320166	6.352701128	5.661515915	5.693804989	5.474806819	H2afz	ENSMUSG00000037894	51788	H2A histone family, member Z
ENSMUSG00000032127.8	chr9	44348106	44361670	-	Vps11	0.663726248	9.47E-07	1.18E-05	4857	4540	3909	7309	7312	7852	6.380595061	6.453477909	6.272670417	7.062184117	7.00908981	7.027072282	Vps11	ENSMUSG00000032127	71732	VPS11, CORVET/HOPS core subunit
ENSMUSG00000032590.14	chr9	108085413	108094606	-	Apeh	0.584059288	9.47E-07	1.18E-05	4156	3665	3391	5734	5945	6252	6.155750277	6.144636739	6.067609802	6.712079094	6.710523232	6.698353396	Apeh	ENSMUSG00000032590	235606	acylpeptide hydrolase
ENSMUSG00000043008.8	chr16	19946499	19983037	-	Klhl6	-1.071957673	9.47E-07	1.18E-05	1264	1213	1049	550	683	565	4.438948102	4.549800842	4.375388476	3.331225862	3.589738333	3.231519173	Klhl6	ENSMUSG00000043008	239743	kelch-like 6
ENSMUSG00000038742.6	chr9	20873809	20879727	-	Angptl6	1.137681192	9.49E-07	1.18E-05	798	681	659	1654	1425	1984	3.775745378	3.717412296	3.705130874	4.918806685	4.65019313	5.042695806	Angptl6	ENSMUSG00000038742	70726	angiopoietin-like 6
ENSMUSG00000041124.11	chr9	4376562	4386870	+	Msantd4	0.667514134	9.49E-07	1.18E-05	2093	1824	1748	2976	3369	3269	5.166297983	5.138127884	5.111804105	5.766028288	5.891259616	5.762990267	Msantd4	ENSMUSG00000041124	78100	Myb/SANT-like DNA-binding domain containing 4 with coiled-coils
ENSMUSG00000074342.3	chr3	105924358	105932664	-	I830077J02Rik	-1.019174336	9.52E-07	1.18E-05	853	749	660	391	358	443	3.871844124	3.854627117	3.707316776	2.839495606	2.658770114	2.880926253	I830077J02Rik	ENSMUSG00000074342	433638	RIKEN cDNA I830077J02 gene
ENSMUSG00000069272.5	chr13	23570662	23571121	-	Hist1h2ae	-2.382153712	9.58E-07	1.19E-05	208	189	208	57	37	33	1.838500354	1.870896487	2.043805598	0.07211716	-0.598240504	-0.84577485	Hist1h2ae	ENSMUSG00000069272	319166	histone cluster 1, H2ae
ENSMUSG00000059248.13	chr11	117199661	117362325	+	9-Sep	0.637657913	9.59E-07	1.19E-05	5589	5139	5084	8660	8944	8689	6.5831003	6.632254746	6.651792218	7.306861712	7.299725928	7.17319341	9-Sep	ENSMUSG00000059248	53860	septin 9
ENSMUSG00000044042.18	chr2	113327736	113716767	+	Fmn1	1.255843873	9.61E-07	1.19E-05	2033	1567	1768	4113	3952	5781	5.124346056	4.919092177	5.128212528	6.232777837	6.121490553	6.58536409	Fmn1	ENSMUSG00000044042	14260	formin 1
ENSMUSG00000028967.10	chr4	150853919	150868892	+	Errfi1	-0.806575053	9.64E-07	1.19E-05	2515	1939	1970	1284	1223	1403	5.431226255	5.226311509	5.284248058	4.553618283	4.429739192	4.542949308	Errfi1	ENSMUSG00000028967	74155	ERBB receptor feedback inhibitor 1
ENSMUSG00000041754.5	chr17	48247777	48258841	+	Trem3	-3.310561565	9.65E-07	1.19E-05	142	116	106	9	22	10	1.28941489	1.169028594	1.074611644	-2.525445378	-1.335206098	-2.519546618	Trem3	ENSMUSG00000041754	58218	triggering receptor expressed on myeloid cells 3
ENSMUSG00000041959.14	chr3	93555080	93564643	+	S100a10	0.771036769	9.64E-07	1.19E-05	13025	12117	11848	20532	24818	22323	7.803647913	7.869646911	7.872318832	8.552248786	8.772069109	8.534411577	S100a10	ENSMUSG00000041959	20194	S100 calcium binding protein A10 (calpactin)
ENSMUSG00000069874.7	chr11	58199618	58222782	+	Irgm2	-0.80940654	9.66E-07	1.19E-05	849	776	750	469	466	513	3.865066918	3.905684563	3.891610286	3.101608456	3.038674077	3.092356425	Irgm2	ENSMUSG00000069874	54396	immunity-related GTPase family M member 2
ENSMUSG00000028559.17	chr4	109061145	109202272	-	Osbpl9	0.632708802	9.68E-07	1.19E-05	5421	4564	4613	7399	8435	8346	6.539073132	6.461083568	6.511547966	7.079839181	7.215198675	7.115091592	Osbpl9	ENSMUSG00000028559	100273	oxysterol binding protein-like 9
ENSMUSG00000042207.17	chr1	134560171	134635285	+	Kdm5b	1.174345263	9.70E-07	1.20E-05	1730	1319	1312	3086	3152	4346	4.891570007	4.670618084	4.698003732	5.818383185	5.795221461	6.173774388	Kdm5b	ENSMUSG00000042207	75605	lysine (K)-specific demethylase 5B
ENSMUSG00000057497.8	chr6	86365646	86370058	+	Fam136a	0.671326737	9.75E-07	1.20E-05	2088	1757	1679	2867	3232	3293	5.162848209	5.084151423	5.053718104	5.712204879	5.83137546	5.773541794	Fam136a	ENSMUSG00000057497	66488	family with sequence similarity 136, member A
ENSMUSG00000019970.15	chr10	21882184	21999903	+	Sgk1	-1.526934277	9.80E-07	1.21E-05	386	319	274	123	104	135	2.728921385	2.62451457	2.440564363	1.17499434	0.880299938	1.170285001	Sgk1	ENSMUSG00000019970	20393	serum/glucocorticoid regulated kinase 1
ENSMUSG00000025583.15	chr11	119602905	119899576	+	Rptor	0.733207174	9.85E-07	1.21E-05	2556	2334	2349	4222	3910	4768	5.454551091	5.493740322	5.538040077	6.270508816	6.106078174	6.307455761	Rptor	ENSMUSG00000025583	74370	regulatory associated protein of MTOR, complex 1
ENSMUSG00000091405.2	chr3	96261682	96263311	-	Hist2h4	-1.772501041	9.84E-07	1.21E-05	10533	9474	9046	2994	2187	4217	7.497294045	7.514676543	7.483046045	5.774726526	5.268008107	6.130308312	Hist2h4	ENSMUSG00000091405	97122	histone cluster 2, H4
ENSMUSG00000054814.14	chr5	73998453	74068431	-	Usp46	0.777175215	9.87E-07	1.21E-05	890	742	776	1328	1472	1615	3.933068582	3.841089665	3.940744139	4.602209621	4.696992724	4.745900994	Usp46	ENSMUSG00000054814	69727	ubiquitin specific peptidase 46
ENSMUSG00000025026.14	chr19	53140445	53247399	+	Add3	-0.738938243	9.90E-07	1.21E-05	2273	1922	1879	1150	1304	1439	5.285296069	5.213610332	5.216035224	4.394672377	4.522222034	4.579488033	Add3	ENSMUSG00000025026	27360	adducin 3 (gamma)
ENSMUSG00000034656.16	chr8	84388440	84640246	+	Cacna1a	1.620042002	9.93E-07	1.22E-05	204	172	193	635	511	742	1.810553814	1.735295001	1.93609178	3.538375424	3.171531235	3.624383175	Cacna1a	ENSMUSG00000034656	12286	calcium channel, voltage-dependent, P/Q type, alpha 1A subunit
ENSMUSG00000021250.13	chr12	85473890	85477273	+	Fos	1.315058289	9.98E-07	1.22E-05	2772	2893	2894	7837	8559	6505	5.571568526	5.803442378	5.839000465	7.162804931	7.236251615	6.755580188	Fos	ENSMUSG00000021250	14281	FBJ osteosarcoma oncogene
ENSMUSG00000065176.1	chr15	83149644	83149794	+	Rnu12	-1.888519501	1.00E-06	1.22E-05	266	201	201	70	69	54	2.192588503	1.959478477	1.994538053	0.366178461	0.291881878	-0.143679716	Rnu12	ENSMUSG00000065176	104307	RNA U12, small nuclear
ENSMUSG00000033257.14	chr1	74661745	74703730	+	Ttll4	-0.596145415	1.00E-06	1.23E-05	5335	4738	4638	3422	3482	3488	6.51600454	6.515057171	6.51934465	5.967461935	5.938848443	5.856527077	Ttll4	ENSMUSG00000033257	67534	tubulin tyrosine ligase-like family, member 4
ENSMUSG00000052125.16	chr12	33111711	33147597	-	F730043M19Rik	-0.79983054	1.01E-06	1.23E-05	854	760	735	469	469	503	3.873533462	3.875646887	3.862483556	3.101608456	3.047922153	3.063983927	F730043M19Rik	ENSMUSG00000052125	320046	RIKEN cDNA F730043M19 gene
ENSMUSG00000014547.9	chr14	62837690	62956886	+	Wdfy2	0.804132791	1.01E-06	1.23E-05	896	828	697	1434	1529	1543	3.942756554	3.999200336	3.785951431	4.712959361	4.751785197	4.680125727	Wdfy2	ENSMUSG00000014547	268752	WD repeat and FYVE domain containing 2
ENSMUSG00000084803.8	chr4	155398763	155421704	-	5830444B04Rik	2.074847633	1.01E-06	1.23E-05	58	42	53	257	201	236	0.0049615	-0.285766615	0.081369011	2.235055731	1.827576834	1.973832333	5830444B04Rik	ENSMUSG00000084803	641454	RIKEN cDNA 5830444B04 gene
ENSMUSG00000040148.5	chr7	131542867	131544925	+	Hmx3	3.549306142	1.02E-06	1.24E-05	9	9	24	162	155	165	-2.617475706	-2.447230038	-1.045388132	1.570923017	1.453711576	1.458823366	Hmx3	ENSMUSG00000040148	15373	H6 homeobox 3
ENSMUSG00000093656.1	chr3	96267075	96270289	-	Gm20628	-1.63404659	1.02E-06	1.24E-05	22441	19456	17833	6291	5302	9550	8.58847827	8.552807038	8.462204278	6.845815414	6.545397806	7.309496509	NA	NA	NA	NA
ENSMUSG00000052160.6	chr12	112760655	112768986	+	Pld4	0.632135095	1.02E-06	1.24E-05	13238	12834	11476	20015	21016	21123	7.827048826	7.952581922	7.826297133	8.515457144	8.532175614	8.454697237	Pld4	ENSMUSG00000052160	104759	phospholipase D family, member 4
ENSMUSG00000004661.15	chr9	57790353	57836793	-	Arid3b	-1.453109549	1.02E-06	1.24E-05	294	252	244	101	88	120	2.336720605	2.284982027	2.273592679	0.891963026	0.640546356	1.001025295	Arid3b	ENSMUSG00000004661	56380	AT rich interactive domain 3B (BRIGHT-like)
ENSMUSG00000026004.15	chr1	66719248	66817562	-	Kansl1l	-0.87120208	1.03E-06	1.25E-05	2097	1688	1890	971	1101	1247	5.169051876	5.026368913	5.224454158	4.150697294	4.278194585	4.372960059	Kansl1l	ENSMUSG00000026004	68691	KAT8 regulatory NSL complex subunit 1-like
ENSMUSG00000034263.12	chr9	64960832	64986974	+	Vwa9	0.664759847	1.03E-06	1.25E-05	4432	4020	3735	6587	6408	7690	6.248501696	6.278001663	6.206987671	6.91214245	6.818711804	6.996997642	Ints14	ENSMUSG00000034263	69882	integrator complex subunit 14
ENSMUSG00000070319.5	chr9	20894352	20898600	-	Eif3g	0.773960448	1.04E-06	1.26E-05	6110	5949	5167	10195	11108	10150	6.711671501	6.843395162	6.675152793	7.542272017	7.612317205	7.397399133	Eif3g	ENSMUSG00000070319	53356	eukaryotic translation initiation factor 3, subunit G
ENSMUSG00000068267.5	chr2	131175182	131180067	-	Cenpb	0.682345617	1.04E-06	1.26E-05	5990	5984	5700	10094	9976	10260	6.683057489	6.85185745	6.816774775	7.527908941	7.457258862	7.412949375	Cenpb	ENSMUSG00000068267	12616	centromere protein B
ENSMUSG00000021125.6	chr12	79130777	79156301	+	Arg2	-1.411855301	1.05E-06	1.27E-05	337	332	326	109	147	145	2.533340473	2.682052979	2.690841206	1.001414168	1.37751195	1.273011302	Arg2	ENSMUSG00000021125	11847	arginase type II
ENSMUSG00000031931.3	chr9	14780209	14782964	-	Ankrd49	0.978070463	1.05E-06	1.27E-05	1662	1196	1361	2637	2832	3399	4.833735406	4.52944713	4.750883291	5.591582487	5.640801046	5.819242814	Ankrd49	ENSMUSG00000031931	56503	ankyrin repeat domain 49
ENSMUSG00000016206.6	chr17	37270220	37274484	+	H2-M3	-1.39122833	1.05E-06	1.27E-05	411	356	352	136	182	141	2.819345401	2.782600715	2.801381472	1.31938425	1.684693459	1.232794202	H2-M3	ENSMUSG00000016206	14991	histocompatibility 2, M region locus 3
ENSMUSG00000019261.3	chr8	70905932	70917529	+	Map1s	-0.670236308	1.05E-06	1.27E-05	4000	3914	3652	2594	2475	2704	6.100561391	6.239454777	6.174570582	5.567867929	5.44644504	5.489282141	Map1s	ENSMUSG00000019261	270058	microtubule-associated protein 1S
ENSMUSG00000000530.16	chr15	101128522	101145336	+	Acvrl1	0.70540781	1.06E-06	1.27E-05	1731	1705	1569	2743	3034	2949	4.892403453	5.040821488	4.955991338	5.648428969	5.740183911	5.614390653	Acvrl1	ENSMUSG00000000530	11482	activin A receptor, type II-like 1
ENSMUSG00000025323.9	chr12	118234933	118301440	-	Sp4	-1.173235716	1.06E-06	1.27E-05	1047	818	874	375	507	421	4.167331309	3.981681055	4.112216598	2.779296206	3.160204818	2.80752478	Sp4	ENSMUSG00000025323	20688	trans-acting transcription factor 4
ENSMUSG00000044147.7	chr12	69372150	69375979	+	Arf6	0.557114799	1.06E-06	1.27E-05	9753	8949	8585	13374	14453	15114	7.386301082	7.432433816	7.407588465	7.933824446	7.992072077	7.971781593	Arf6	ENSMUSG00000044147	11845	ADP-ribosylation factor 6
ENSMUSG00000109501.1	chr7	47110851	47125990	+	Gm14377	1.30181374	1.06E-06	1.28E-05	139	142	147	364	392	372	1.258718093	1.459660558	1.544473169	2.736402113	2.789489649	2.629232575	Gm14377	NA	102634561	predicted gene 14377
ENSMUSG00000064267.13	chr5	122206804	122242297	+	Hvcn1	-1.218892088	1.06E-06	1.28E-05	467	383	425	201	200	184	3.003419335	2.887925216	3.072917346	1.881263137	1.820399232	1.615612965	Hvcn1	ENSMUSG00000064267	74096	hydrogen voltage-gated channel 1
ENSMUSG00000049130.6	chr7	16246743	16259540	-	C5ar1	0.65965829	1.07E-06	1.28E-05	1411	1237	1243	2186	2110	2272	4.597610194	4.578055259	4.620092816	5.321034742	5.21630992	5.238200538	C5ar1	ENSMUSG00000049130	12273	complement component 5a receptor 1
ENSMUSG00000009687.14	chr7	31032722	31042481	-	Fxyd5	0.735167607	1.07E-06	1.28E-05	39750	37835	37350	66179	62403	76837	9.413282168	9.512295339	9.52874196	10.24072388	10.10228013	10.31765892	Fxyd5	ENSMUSG00000009687	18301	FXYD domain-containing ion transport regulator 5
ENSMUSG00000037428.14	chr5	137026392	137033351	+	Vgf	2.264762546	1.07E-06	1.28E-05	118	95	121	526	461	757	1.02334003	0.882271277	1.264714528	3.26691683	3.023127643	3.653238038	Vgf	ENSMUSG00000037428	381677	VGF nerve growth factor inducible
ENSMUSG00000023259.16	chr9	108853283	108913049	+	Slc26a6	1.082982139	1.07E-06	1.29E-05	251	217	242	515	560	533	2.109011371	2.06971404	2.261742961	3.236455726	3.303511368	3.14748042	Slc26a6	ENSMUSG00000023259	171429	solute carrier family 26, member 6
ENSMUSG00000028970.9	chr5	8798147	8866315	+	Abcb1b	-0.630682658	1.08E-06	1.29E-05	16811	13841	14141	9491	10051	11374	8.171757615	8.061555124	8.12754956	7.439047496	7.468063998	7.561651467	Abcb1b	ENSMUSG00000028970	18669	ATP-binding cassette, sub-family B (MDR/TAP), member 1B
ENSMUSG00000047731.17	chr19	46599084	46657389	+	Wbp1l	0.712445565	1.08E-06	1.29E-05	4971	4543	4349	7722	7415	9237	6.414062272	6.454430812	6.426535873	7.141479359	7.029269062	7.261422703	Wbp1l	ENSMUSG00000047731	226178	WW domain binding protein 1 like
ENSMUSG00000075122.4	chr16	38458933	38486933	+	Cd80	-0.692202233	1.08E-06	1.30E-05	2442	1956	1986	1310	1408	1494	5.388739628	5.238901844	5.295915102	4.582528747	4.632884654	4.633583141	Cd80	ENSMUSG00000075122	12519	CD80 antigen
ENSMUSG00000024742.15	chr19	10199132	10204169	-	Fen1	-1.226972658	1.09E-06	1.30E-05	3973	4079	3610	1775	2063	1530	6.09079141	6.299019074	6.157884951	5.020636754	5.183818529	4.667923289	Fen1	ENSMUSG00000024742	14156	flap structure specific endonuclease 1
ENSMUSG00000030108.14	chr6	121300227	121337733	+	Slc6a13	-0.927719796	1.09E-06	1.30E-05	1169	1132	1007	659	592	609	4.326272927	4.450137784	4.316466148	3.591855958	3.383612149	3.33961837	Slc6a13	ENSMUSG00000030108	14412	solute carrier family 6 (neurotransmitter transporter, GABA), member 13
ENSMUSG00000032036.15	chr9	34485894	35036716	+	Kirrel3	2.986243453	1.09E-06	1.30E-05	17	16	8	115	102	128	-1.736120202	-1.650763432	-2.572635134	1.07837615	0.852420905	1.093760508	Kirrel3	ENSMUSG00000032036	67703	kirre like nephrin family adhesion molecule 3
ENSMUSG00000058470.10	chr19	11485938	11512577	+	Gm8369	-2.843769372	1.09E-06	1.30E-05	84	79	91	11	10	16	0.535476217	0.617725404	0.855601863	-2.249810935	-2.434741772	-1.867469921	Gm8369	ENSMUSG00000058470	666926	predicted gene 8369
ENSMUSG00000091952.3	chr8	121972727	121973822	-	Gm17709	1.316366225	1.09E-06	1.30E-05	154	126	127	325	344	419	1.406059809	1.287836024	1.334255461	2.573140842	2.601300978	2.80066296	Gm17709	NA	100417679	ornithine decarboxylase, structural 1 pseudogene
ENSMUSG00000091844.1	chr1	44055952	44061936	-	Gm8251	-2.880769929	1.09E-06	1.30E-05	158	119	168	20	16	28	1.442935811	1.205709257	1.736506805	-1.415820887	-1.782665075	-1.078974027	Gm8251	NA	666713	predicted gene 8251
ENSMUSG00000084786.9	chr9	20642878	20647140	+	Ubl5	0.855107751	1.10E-06	1.31E-05	6061	5289	5028	9787	9478	12593	6.700055918	6.673758089	6.635814418	7.483351796	7.383383857	7.708527633	Ubl5	ENSMUSG00000084786	66177	ubiquitin-like 5
ENSMUSG00000002233.13	chr3	104788375	104794459	+	Rhoc	0.751053381	1.10E-06	1.31E-05	3905	3793	3701	6914	7003	6602	6.065888326	6.194156271	6.193796338	6.982036325	6.94680118	6.77693264	Rhoc	ENSMUSG00000002233	11853	ras homolog family member C
ENSMUSG00000072955.13	chrX	136954988	136976869	-	Tmsb15l	5.555042853	1.10E-06	1.31E-05	0	0	2	46	39	43	-6.865403219	-6.695157551	-4.338169881	-0.23421408	-0.523278446	-0.468920545	Tmsb15l	ENSMUSG00000072955	399591	thymosin beta 15b like
ENSMUSG00000039452.5	chr9	66065176	66069731	-	Snx22	0.608331136	1.11E-06	1.31E-05	12158	11680	10602	17566	19148	19413	7.704274414	7.816656861	7.712018887	8.327166261	8.397884568	8.332908579	Snx22	ENSMUSG00000039452	382083	sorting nexin 22
ENSMUSG00000000386.14	chr16	97447035	97462907	-	Mx1	-5.633841544	1.11E-06	1.32E-05	49	39	31	2	0	0	-0.236046599	-0.391376803	-0.682818052	-4.451444797	-6.827059194	-6.911864041	Mx1	ENSMUSG00000000386	17857	MX dynamin-like GTPase 1
ENSMUSG00000109111.1	chr7	44970429	44974303	+	6530437J22Rik	-2.170775288	1.12E-06	1.32E-05	349	287	293	68	51	110	2.583745426	2.472260595	2.537118717	0.324659192	-0.140558667	0.876038519	Cpt1c	ENSMUSG00000007783	78070	carnitine palmitoyltransferase 1c
ENSMUSG00000053395.15	chr7	3390683	3415648	+	Cacng8	1.764248311	1.12E-06	1.33E-05	95	85	97	360	353	300	0.712025609	0.722694964	0.947232338	2.720482558	2.63850721	2.31935714	Cacng8	ENSMUSG00000053395	81905	calcium channel, voltage-dependent, gamma subunit 8
ENSMUSG00000022906.15	chr16	35938470	35972605	+	Parp9	-0.768361629	1.12E-06	1.33E-05	2365	2133	1996	1183	1449	1452	5.342526226	5.363848844	5.303159381	4.435471099	4.674280424	4.592458407	Parp9	ENSMUSG00000022906	80285	poly (ADP-ribose) polymerase family, member 9
ENSMUSG00000047264.8	chr8	3493138	3497208	+	Zfp358	1.654249757	1.12E-06	1.33E-05	245	177	184	664	559	830	2.074175995	1.776517663	1.86737903	3.602752498	3.300935127	3.785972317	Zfp358	ENSMUSG00000047264	140482	zinc finger protein 358
ENSMUSG00000042606.9	chr7	126861972	126865377	+	Hirip3	-0.740805457	1.13E-06	1.34E-05	2158	1934	1893	1271	1159	1405	5.210410158	5.222587462	5.22674173	4.538942855	4.35222791	4.545003698	Hirip3	ENSMUSG00000042606	233876	HIRA interacting protein 3
ENSMUSG00000089768.2	chrX	136974022	136976874	-	Tmsb15b1	5.501649103	1.13E-06	1.34E-05	0	0	2	42	40	41	-6.865403219	-6.695157551	-4.338169881	-0.363981955	-0.487209191	-0.536824609	Tmsb15b1	ENSMUSG00000089768	666244	thymosin beta 15b1
ENSMUSG00000025510.14	chr7	141467392	141471473	+	Cd151	0.635275758	1.14E-06	1.35E-05	1557	1478	1445	2383	2427	2632	4.739613229	4.834760977	4.837254918	5.445493019	5.418196386	5.450353775	Cd151	ENSMUSG00000025510	12476	CD151 antigen
ENSMUSG00000046341.5	chr4	69925630	69926079	-	Gm11223	-1.360402104	1.14E-06	1.35E-05	375	348	351	169	140	140	2.687265878	2.749857295	2.797282903	1.631768572	1.307367126	1.222562279	Gm11223	NA	100039888	stathmin 1 pseudogene
ENSMUSG00000027562.12	chr3	14886273	14900770	+	Car2	-0.805849463	1.15E-06	1.35E-05	46564	43263	41399	25698	29381	25307	9.641539647	9.705705212	9.677227748	8.876023641	9.015561236	8.715413337	Car2	ENSMUSG00000027562	12349	carbonic anhydrase 2
ENSMUSG00000093264.1	chr11	120346736	120346819	-	Gm23419	0.667068066	1.15E-06	1.35E-05	2710	2353	2134	3933	4166	4079	5.538940072	5.505434587	5.399584472	6.168224977	6.19756107	6.082312584	NA	NA	NA	NA
ENSMUSG00000022364.14	chr15	57912199	57970067	+	Tbc1d31	-0.748316197	1.15E-06	1.35E-05	1596	1325	1316	888	838	967	4.775293618	4.677163404	4.70239383	4.021855075	3.884607779	4.00625381	Tbc1d31	ENSMUSG00000022364	210544	TBC1 domain family, member 31
ENSMUSG00000027811.9	chr3	79629079	79632820	+	4930579G24Rik	-0.882654427	1.15E-06	1.35E-05	1392	1228	1198	660	690	873	4.578058393	4.567524591	4.566916218	3.59404186	3.60443841	3.858799852	4930579G24Rik	ENSMUSG00000027811	75939	RIKEN cDNA 4930579G24 gene
ENSMUSG00000023341.14	chr16	97535308	97560900	+	Mx2	-3.640447081	1.16E-06	1.36E-05	85	82	74	6	11	4	0.552449296	0.671164663	0.559070545	-3.072933173	-2.303497238	-3.741939039	Mx2	ENSMUSG00000023341	17858	MX dynamin-like GTPase 2
ENSMUSG00000024143.14	chr17	86963082	87000069	+	Rhoq	-0.636330083	1.16E-06	1.36E-05	4975	4056	4238	2812	3127	3170	6.415222578	6.290862222	6.389240096	5.68426449	5.783734975	5.718630621	Rhoq	ENSMUSG00000024143	104215	ras homolog family member Q
ENSMUSG00000022303.8	chr15	39745932	39760934	+	Dcstamp	1.409473291	1.16E-06	1.36E-05	247	229	218	589	776	622	2.085881496	2.147192792	2.111391494	3.429975112	3.77378292	3.370065986	Dcstamp	ENSMUSG00000022303	75766	dendrocyte expressed seven transmembrane protein
ENSMUSG00000032373.14	chr9	66713686	66766845	+	Car12	-0.619000537	1.17E-06	1.37E-05	2726	2519	2356	1736	1702	1850	5.547431221	5.60376419	5.54233199	4.988593804	4.906379889	4.941835379	Car12	ENSMUSG00000032373	76459	carbonic anhydrase 12
ENSMUSG00000038776.13	chr1	180976210	181020904	-	Ephx1	0.81729461	1.17E-06	1.37E-05	2830	2437	2402	4499	4356	5662	5.601437989	5.556028952	5.57022274	6.362176086	6.261894633	6.555359389	Ephx1	ENSMUSG00000038776	13849	epoxide hydrolase 1, microsomal
ENSMUSG00000006299.13	chr1	74279840	74284738	-	Aamp	0.576586461	1.18E-06	1.38E-05	5431	5211	4844	7917	8106	8671	6.541731743	6.65232541	6.582034082	7.177456356	7.157804252	7.170201817	Aamp	ENSMUSG00000006299	227290	angio-associated migratory protein
ENSMUSG00000063108.14	chr9	20432972	20460162	-	Zfp26	0.621076425	1.18E-06	1.38E-05	2682	2354	2383	3701	4202	4307	5.523959236	5.506047456	5.558767934	6.080521422	6.20997291	6.16077104	Zfp26	ENSMUSG00000063108	22688	zinc finger protein 26
ENSMUSG00000027342.14	chr2	132249162	132253314	-	Pcna	-0.801746864	1.18E-06	1.38E-05	7967	7693	7035	4338	5123	4484	7.094508179	7.214266806	7.120339266	6.309607722	6.495854781	6.218867384	Pcna	ENSMUSG00000027342	18538	proliferating cell nuclear antigen
ENSMUSG00000003814.8	chr8	84841850	84846934	-	Calr	0.564812717	1.19E-06	1.39E-05	47497	43081	42058	65178	69236	75573	9.67016074	9.699623311	9.700011802	10.21873564	10.25218598	10.29372878	Calr	ENSMUSG00000003814	12317	calreticulin
ENSMUSG00000032393.14	chr9	65032458	65082650	+	Dpp8	0.637656892	1.20E-06	1.40E-05	9607	7862	7835	13020	14643	14309	7.364542137	7.245614846	7.275711648	7.895124339	8.010913604	7.892821601	Dpp8	ENSMUSG00000032393	74388	dipeptidylpeptidase 8
ENSMUSG00000001270.8	chr12	111669355	111672338	-	Ckb	-0.712583139	1.21E-06	1.41E-05	5532	5639	5165	3576	3387	3699	6.568312611	6.766193992	6.674594312	6.030959835	5.898946037	5.941250543	Chkb	ENSMUSG00000022617	12651	choline kinase beta
ENSMUSG00000057982.7	chr9	22225714	22243197	+	Zfp809	0.754471254	1.21E-06	1.41E-05	1665	1365	1347	2351	2582	2968	4.836336419	4.720056048	4.735971582	5.425992725	5.507493439	5.623654357	Zfp809	ENSMUSG00000057982	235047	zinc finger protein 809
ENSMUSG00000087047.8	chr9	40323426	40343564	+	1700110K17Rik	0.98568091	1.21E-06	1.41E-05	363	315	285	617	723	699	2.640408335	2.606338644	2.49724896	3.496922435	3.671790012	3.538316206	1700110K17Rik	NA	73558	RIKEN cDNA 1700110K17 gene
ENSMUSG00000022314.9	chr15	51962605	51991760	-	Rad21	-0.757759516	1.23E-06	1.43E-05	8770	7558	7326	4443	4738	5836	7.233040157	7.188726691	7.178810471	6.344107881	6.383155528	6.599023725	Rad21	ENSMUSG00000022314	19357	RAD21 cohesin complex component
ENSMUSG00000064382.1	chr16	23111301	23111429	+	Gm26447	-1.044273892	1.23E-06	1.43E-05	1043	877	931	461	562	460	4.161811666	4.082097764	4.203313983	3.076813946	3.308650092	2.935193305	NA	NA	NA	NA
ENSMUSG00000037523.13	chr2	131234063	131248025	+	Mavs	0.598639793	1.24E-06	1.44E-05	2975	2690	2463	4306	4349	4478	5.673513183	5.69850104	5.606395781	6.298927225	6.259574655	6.21693585	Mavs	ENSMUSG00000037523	228607	mitochondrial antiviral signaling protein
ENSMUSG00000038126.17	chr5	124250959	124327972	-	Mphosph9	-0.659357471	1.24E-06	1.44E-05	2294	1994	1959	1308	1357	1566	5.298560872	5.266653857	5.276171882	4.580325318	4.579677288	4.701465014	Mphosph9	ENSMUSG00000038126	269702	M-phase phosphoprotein 9
ENSMUSG00000038215.15	chr8	56531522	56551047	-	Cep44	-0.746915386	1.24E-06	1.44E-05	1000	898	880	549	602	618	4.101102233	4.116217142	4.122081218	3.32860278	3.407758237	3.360765744	Cep44	ENSMUSG00000038215	382010	centrosomal protein 44
ENSMUSG00000020671.8	chr12	3247430	3309969	-	Rab10	0.680171651	1.25E-06	1.45E-05	4959	4049	3981	6606	7686	7934	6.410575746	6.28837052	6.298998367	6.916297555	7.081051916	7.042059557	Rab10	ENSMUSG00000020671	19325	RAB10, member RAS oncogene family
ENSMUSG00000024843.15	chr19	3851773	3894369	+	Chka	-1.069410453	1.26E-06	1.46E-05	838	659	725	344	421	367	3.846263754	3.670071298	3.842733828	2.654987281	2.892329627	2.609736399	Chka	ENSMUSG00000024843	12660	choline kinase alpha
ENSMUSG00000057315.14	chr5	102481391	102897937	+	Arhgap24	-2.690735035	1.26E-06	1.46E-05	154	170	167	23	39	21	1.406059809	1.718470378	1.72791931	-1.21878404	-0.523278446	-1.485599286	Arhgap24	ENSMUSG00000057315	231532	Rho GTPase activating protein 24
ENSMUSG00000069309.2	chr13	21786826	21787218	-	Hist1h2an	-3.099486596	1.26E-06	1.46E-05	229	342	271	36	35	31	1.976947124	2.724802627	2.424710412	-0.583548333	-0.677312075	-0.934584117	Hist1h2an	ENSMUSG00000069309	319170	histone cluster 1, H2an
ENSMUSG00000057110.15	chr2	35109492	35178822	+	Cntrl	-0.621046058	1.27E-06	1.47E-05	7963	6620	7035	4638	5175	5198	7.093783708	6.997566911	7.120339266	6.406069735	6.510423337	6.432015645	Cntrl	ENSMUSG00000057110	26920	centriolin
ENSMUSG00000026427.16	chr1	131153181	131187658	+	Eif2d	-0.668423245	1.28E-06	1.47E-05	4829	4552	4471	2923	3300	3106	6.372254899	6.457285751	6.466445185	5.740107985	5.861409688	5.689210298	Eif2d	ENSMUSG00000026427	16865	eukaryotic translation initiation factor 2D
ENSMUSG00000031880.7	chr8	104628070	104631327	-	Rrad	-1.476691068	1.28E-06	1.47E-05	594	655	461	217	208	225	3.35012978	3.661294419	3.190088862	1.991498699	1.876844379	1.905119582	Rrad	ENSMUSG00000031880	56437	Ras-related associated with diabetes
ENSMUSG00000079260.2	chr9	114401095	114411200	+	Tmppe	0.796264356	1.28E-06	1.47E-05	1117	1035	1032	2021	1795	2106	4.260655897	4.320954287	4.351828091	5.207837597	4.983110743	5.12876816	Tmppe	ENSMUSG00000079260	100504715	transmembrane protein with metallophosphoesterase domain
ENSMUSG00000107722.1	chr1	118458652	118459267	-	2900060B14Rik	-1.710397068	1.29E-06	1.49E-05	307	243	239	66	84	110	2.399039381	2.232620411	2.24378387	0.281909544	0.573820242	0.876038519	2900060B14Rik	ENSMUSG00000107722	68204	RIKEN cDNA 2900060B14 gene
ENSMUSG00000019188.16	chr2	152669461	152708670	+	H13	0.549042289	1.30E-06	1.49E-05	7204	6562	6380	10131	10627	10740	6.949279375	6.984872251	6.979355792	7.533187274	7.548455444	7.478909495	H13	ENSMUSG00000019188	14950	histocompatibility 13
ENSMUSG00000102700.1	chr1	89097073	89098818	+	Gm38312	-4.282992041	1.30E-06	1.49E-05	57	55	44	4	3	1	-0.019913168	0.099258315	-0.184364545	-3.60344789	-4.019704272	-5.32690154	NA	NA	NA	NA
ENSMUSG00000058761.5	chr7	99920254	99980448	-	Rnf169	-0.586080069	1.30E-06	1.49E-05	5550	4890	4898	3620	3624	3668	6.572998803	6.560608706	6.598026349	6.048600344	5.996507079	5.929110529	Rnf169	ENSMUSG00000058761	108937	ring finger protein 169
ENSMUSG00000051768.9	chr7	24546289	24573440	+	Xrcc1	-0.636514952	1.30E-06	1.49E-05	4729	4250	4236	3050	3044	2990	6.342068736	6.358259294	6.388559178	5.801457124	5.744930403	5.634306961	Xrcc1	ENSMUSG00000051768	22594	X-ray repair complementing defective repair in Chinese hamster cells 1
ENSMUSG00000089796.1	chr15	79739574	79741798	+	Gm16575	-1.530235043	1.31E-06	1.50E-05	338	360	368	142	115	137	2.537608804	2.798697898	2.865422833	1.381445218	1.024689847	1.191423768	NA	NA	NA	NA
ENSMUSG00000040428.19	chr7	45526330	45554229	+	Plekha4	-1.723998555	1.31E-06	1.51E-05	176	147	169	50	56	52	1.598121154	1.509413593	1.745043487	-0.115161409	-0.006880232	-0.197618523	Plekha4	ENSMUSG00000040428	69217	pleckstrin homology domain containing, family A (phosphoinositide binding specific) member 4
ENSMUSG00000101695.1	chr10	76389015	76401507	+	1700094J05Rik	-1.170944649	1.32E-06	1.52E-05	345	336	293	145	153	163	2.567138681	2.699305143	2.537118717	1.411502452	1.435035651	1.441282785	1700094J05Rik	ENSMUSG00000101695	67523	RIKEN cDNA 1700094J05 gene
ENSMUSG00000024812.9	chr19	24094523	24225026	-	Tjp2	0.736260061	1.33E-06	1.52E-05	1582	1491	1453	2673	2784	2606	4.762586565	4.847390711	4.84521738	5.61114107	5.616143383	5.436034104	Tjp2	ENSMUSG00000024812	21873	tight junction protein 2
ENSMUSG00000028063.15	chr3	88480147	88509956	-	Lmna	1.028426802	1.33E-06	1.52E-05	20728	20773	19345	42860	50584	39894	8.473924881	8.647299136	8.579612421	9.613988168	9.79934857	9.372038204	Lmna	ENSMUSG00000028063	16905	lamin A
ENSMUSG00000021180.8	chr12	100549778	100725028	-	Rps6ka5	-0.887187519	1.33E-06	1.52E-05	606	572	530	313	328	345	3.378960616	3.465974332	3.391110965	2.518948741	2.532690366	2.52067786	Rps6ka5	ENSMUSG00000021180	73086	ribosomal protein S6 kinase, polypeptide 5
ENSMUSG00000108350.1	chr7	79922572	79924867	-	Gm44950	2.319310181	1.33E-06	1.52E-05	34	32	35	148	217	185	-0.756878763	-0.672789738	-0.510350856	1.440946229	1.937812396	1.623411336	NA	NA	NA	NA
ENSMUSG00000034764.15	chr10	120364157	120384336	+	1700006J14Rik	1.337200677	1.35E-06	1.54E-05	198	139	154	398	415	512	1.767591978	1.428963761	1.611365052	2.865063023	2.871645472	3.089544154	1700006J14Rik	NA	321010	RIKEN cDNA 1700006J14 gene
ENSMUSG00000032386.15	chr9	65828930	65908794	-	Trip4	0.702284271	1.35E-06	1.55E-05	1632	1464	1321	2306	2672	2704	4.807464057	4.821034927	4.707862734	5.398116686	5.556915038	5.489282141	Trip4	ENSMUSG00000032386	56404	thyroid hormone receptor interactor 4
ENSMUSG00000100455.1	chr1	143777642	143781307	+	Gm29170	-1.209886681	1.36E-06	1.55E-05	566	406	448	215	206	231	3.280528927	2.971953991	3.148866199	1.978171168	1.862938777	1.943004342	NA	NA	NA	NA
ENSMUSG00000059713.12	chr4	135412308	135433853	-	Rcan3	0.780690294	1.36E-06	1.55E-05	1699	1440	1506	2796	3014	2719	4.865491427	4.797196394	4.896886982	5.676033724	5.73064382	5.49726167	Rcan3	ENSMUSG00000059713	53902	regulator of calcineurin 3
ENSMUSG00000093577.1	chr3	96239393	96241819	+	Gm20632	-1.005357525	1.36E-06	1.55E-05	600	596	511	295	310	302	3.364617216	3.525220777	3.338492454	2.433641429	2.451390264	2.328927291	NA	NA	NA	NA
ENSMUSG00000097469.1	chr9	20432760	20563282	+	Gm26733	0.784987274	1.37E-06	1.55E-05	594	490	487	916	930	1046	3.35012978	3.242951775	3.269160433	4.066618179	4.034803146	4.119492555	NA	NA	NA	NA
ENSMUSG00000028656.14	chr4	122859047	122886056	-	Cap1	0.557095996	1.37E-06	1.55E-05	29235	25524	24840	39064	40687	45471	8.970030425	8.944437529	8.940308617	9.480197637	9.485238823	9.560810935	Cap1	ENSMUSG00000028656	12331	CAP, adenylate cyclase-associated protein 1 (yeast)
ENSMUSG00000019873.7	chr10	67009189	67096988	-	Reep3	0.588393512	1.37E-06	1.56E-05	2643	2358	2241	3792	3917	3916	5.502830392	5.508496334	5.470150808	6.115560574	6.108658365	6.023485202	Reep3	ENSMUSG00000019873	28193	receptor accessory protein 3
ENSMUSG00000041268.16	chr9	54365158	54501760	-	Dmxl2	0.607240292	1.38E-06	1.56E-05	2790	2343	2456	3843	4030	4486	5.580904712	5.499291528	5.602290548	6.134832062	6.149683912	6.219510655	Dmxl2	ENSMUSG00000041268	235380	Dmx-like 2
ENSMUSG00000044037.15	chr9	110879870	110900530	+	Als2cl	0.835544188	1.38E-06	1.56E-05	443	382	355	710	761	778	2.927387075	2.884158386	2.813607774	3.699317948	3.745641032	3.692689188	Als2cl	ENSMUSG00000044037	235633	ALS2 C-terminal like
ENSMUSG00000003849.8	chr8	107388225	107403206	-	Nqo1	2.040961983	1.39E-06	1.57E-05	45	56	35	198	208	188	-0.357608579	0.125021411	-0.510350856	1.859622306	1.876844379	1.646556672	Nqo1	ENSMUSG00000003849	18104	NAD(P)H dehydrogenase, quinone 1
ENSMUSG00000037112.16	chr9	50892801	51009073	-	Sik2	0.769197833	1.40E-06	1.59E-05	1165	1037	1002	1851	1787	2216	4.32133007	4.32373807	4.309288546	5.081105943	4.976668332	5.202203606	Sik2	ENSMUSG00000037112	235344	salt inducible kinase 2
ENSMUSG00000022089.8	chr14	70100145	70138191	+	Bin3	0.769455005	1.42E-06	1.60E-05	2886	2650	2514	4747	5294	4641	5.629702291	5.676891274	5.635957862	6.439579394	6.543219536	6.268511362	Bin3	ENSMUSG00000022089	57784	bridging integrator 3
ENSMUSG00000039285.12	chr9	118040499	118069794	+	Azi2	0.651455193	1.42E-06	1.61E-05	2492	2275	2226	3672	4157	3921	5.41797457	5.45681032	5.460463921	6.069173884	6.194441354	6.025325844	Azi2	ENSMUSG00000039285	27215	5-azacytidine induced gene 2
ENSMUSG00000079481.11	chrX	101849385	102092055	+	Nhsl2	1.669465856	1.43E-06	1.62E-05	99	61	63	230	253	267	0.771221401	0.247356954	0.328586711	2.075250049	2.158782743	2.15153104	Nhsl2	ENSMUSG00000079481	100042480	NHS-like 2
ENSMUSG00000024474.5	chr18	36744656	36757639	+	Ik	0.535285382	1.43E-06	1.62E-05	14377	12728	12272	19492	19693	21797	7.946121998	7.940617242	7.923043571	8.477258623	8.43837272	8.500011018	Ik	ENSMUSG00000024474	24010	IK cytokine
ENSMUSG00000008206.16	chr8	4493026	4531680	+	Cers4	-0.865193446	1.45E-06	1.63E-05	1082	835	852	502	530	587	4.21474809	4.011338467	4.075458048	3.199606895	3.224149747	3.286581001	Cers4	ENSMUSG00000008206	67260	ceramide synthase 4
ENSMUSG00000032577.16	chr9	107254927	107289877	-	Mapkapk3	-4.275758357	1.45E-06	1.64E-05	121	118	104	4	3	15	1.059409284	1.193585698	1.047261156	-3.60344789	-4.019704272	-1.95766773	Mapkapk3	ENSMUSG00000032577	102626	mitogen-activated protein kinase-activated protein kinase 3
ENSMUSG00000054618.8	chr8	34049262	34057046	+	Gm9951	-3.051323038	1.46E-06	1.64E-05	54	43	45	5	6	6	-0.097218895	-0.252214055	-0.152303336	-3.313941273	-3.126619476	-3.211424323	Gm9951	NA	791287	predicted gene 9951
ENSMUSG00000038264.7	chr9	57940113	57962864	+	Sema7a	4.181122447	1.46E-06	1.65E-05	4	1	4	51	65	65	-3.695478218	-5.11019505	-3.490172974	-0.086872364	0.206363807	0.121558961	Sema7a	ENSMUSG00000038264	20361	sema domain, immunoglobulin domain (Ig), and GPI membrane anchor, (semaphorin) 7A
ENSMUSG00000042396.9	chr9	48488709	48495330	-	Rbm7	0.602682647	1.47E-06	1.65E-05	4189	3607	3432	5950	6175	6055	6.16715914	6.121626128	6.084946029	6.765422291	6.76528104	6.652166331	Rbm7	ENSMUSG00000042396	67010	RNA binding motif protein 7
ENSMUSG00000025792.9	chr11	120491840	120499187	+	Slc25a10	-1.099940348	1.47E-06	1.65E-05	956	1029	947	473	534	457	4.036217939	4.312570564	4.227884157	3.113847724	3.234986943	2.925763892	Slc25a10	ENSMUSG00000025792	27376	solute carrier family 25 (mitochondrial carrier, dicarboxylate transporter), member 10
ENSMUSG00000038732.14	chr13	30136498	30246717	+	Mboat1	-0.816315316	1.48E-06	1.67E-05	1118	958	933	635	575	616	4.261946322	4.209477071	4.206408236	3.538375424	3.341612924	3.356093044	Mboat1	ENSMUSG00000038732	218121	membrane bound O-acyltransferase domain containing 1
ENSMUSG00000006651.8	chr7	30434982	30445535	-	Aplp1	2.154902734	1.49E-06	1.68E-05	35	39	24	162	142	161	-0.7156561	-0.391376803	-1.045388132	1.570923017	1.327758915	1.423526314	Aplp1	ENSMUSG00000006651	11803	amyloid beta (A4) precursor-like protein 1
ENSMUSG00000004096.8	chr9	14500617	14510577	+	Cwc15	0.684515178	1.50E-06	1.68E-05	6250	5910	5601	9611	10947	9991	6.744352666	6.833906914	6.791499521	7.457172993	7.591254635	7.374621526	Cwc15	ENSMUSG00000004096	66070	CWC15 spliceosome-associated protein
ENSMUSG00000047798.15	chr11	115116214	115133992	-	Cd300lf	-1.336336795	1.50E-06	1.68E-05	673	453	559	225	234	247	3.530130916	3.129801189	3.467896345	2.043610732	2.046384918	2.039420674	Cd300lf	ENSMUSG00000047798	246746	CD300 molecule like family member F
ENSMUSG00000032112.9	chr9	44403761	44407548	-	Trappc4	0.861339438	1.50E-06	1.68E-05	994	963	879	1767	1992	1756	4.092424342	4.216983305	4.120441792	5.014121608	5.133304815	4.86662382	Trappc4	ENSMUSG00000032112	60409	trafficking protein particle complex 4
ENSMUSG00000018102.4	chr13	23684199	23692488	+	Hist1h2bc	-1.747651017	1.51E-06	1.69E-05	462	536	440	164	173	124	2.987906336	3.37227681	3.122900233	1.588570882	1.611732658	1.048137891	Hist1h2bc	ENSMUSG00000018102	68024	histone cluster 1, H2bc
ENSMUSG00000002365.9	chr17	5841328	5931033	+	Snx9	0.745191123	1.51E-06	1.69E-05	4833	4394	4296	7305	7579	9498	6.373449307	6.40632576	6.408848204	7.06139441	7.060827771	7.301619945	Snx9	ENSMUSG00000002365	66616	sorting nexin 9
ENSMUSG00000038236.8	chr6	52214491	52221854	-	Hoxa7	3.457301709	1.52E-06	1.70E-05	79	77	72	809	664	1325	0.447479736	0.580966854	0.519811114	3.887514379	3.549066195	4.460456914	Hoxa7	ENSMUSG00000038236	15404	homeobox A7
ENSMUSG00000037926.15	chr11	77216287	77460220	+	Ssh2	-0.628140302	1.53E-06	1.71E-05	6476	5420	5710	3789	3881	4516	6.795595435	6.709052669	6.81930338	6.1144189	6.095339378	6.229125453	Ssh2	ENSMUSG00000037926	237860	slingshot protein phosphatase 2
ENSMUSG00000041488.16	chr19	11775118	11819403	-	Stx3	-0.784445335	1.53E-06	1.71E-05	1521	1333	1264	845	894	816	4.705875399	4.685844558	4.644253346	3.950288053	3.977878478	3.761445035	Stx3	ENSMUSG00000041488	20908	syntaxin 3
ENSMUSG00000046718.8	chr8	71534255	71537456	-	Bst2	-0.786616508	1.54E-06	1.71E-05	1019	928	838	568	542	614	4.128242841	4.163600549	4.051568998	3.377643647	3.256420133	3.35140516	Bst2	ENSMUSG00000046718	69550	bone marrow stromal cell antigen 2
ENSMUSG00000038332.12	chr10	41810574	41908424	+	Sesn1	-0.677813911	1.54E-06	1.71E-05	1609	1518	1443	993	1034	1026	4.786993642	4.873273642	4.835257417	4.183003266	4.187658736	4.091653871	Sesn1	ENSMUSG00000038332	140742	sestrin 1
ENSMUSG00000004099.15	chr9	20907206	20959888	-	Dnmt1	-0.57018736	1.55E-06	1.72E-05	16664	15631	14686	10655	11640	11535	8.159087192	8.237011055	8.182105026	7.60593778	7.679806214	7.581928877	Dnmt1	ENSMUSG00000004099	13433	DNA methyltransferase (cytosine-5) 1
ENSMUSG00000006611.14	chr13	23702034	23710854	-	Hfe	0.782004179	1.57E-06	1.75E-05	759	765	709	1252	1424	1431	3.703502935	3.885101016	3.810560898	4.517221997	4.649180712	4.571447914	Hfe	ENSMUSG00000006611	15216	hemochromatosis
ENSMUSG00000035383.7	chr10	88091072	88092375	+	Pmch	-2.442527866	1.58E-06	1.75E-05	145	153	140	27	20	41	1.319472124	1.566937294	1.474328344	-0.992013178	-1.46950719	-0.536824609	Pmch	ENSMUSG00000035383	110312	pro-melanin-concentrating hormone
ENSMUSG00000022272.17	chr15	25622525	25813673	+	Myo10	0.621130514	1.58E-06	1.75E-05	2120	1910	1980	3242	3140	3504	5.184785548	5.204576991	5.29155101	5.889517968	5.78971936	5.863128868	Myo10	ENSMUSG00000022272	17909	myosin X
ENSMUSG00000091479.1	chr15	66929607	66931107	+	Gm17035	-1.687308115	1.58E-06	1.76E-05	225	197	173	53	64	81	1.951580404	1.930551292	1.778693877	-0.031905905	0.184168061	0.436864113	NA	NA	NA	NA
ENSMUSG00000090608.1	chr9	123678096	123701046	+	Gm17200	0.820443546	1.59E-06	1.76E-05	632	593	550	988	1132	1239	3.43951845	3.517946669	3.444500778	4.175724264	4.318236141	4.363678515	NA	NA	NA	NA
ENSMUSG00000030124.2	chr6	124904361	124911705	-	Lag3	3.086568901	1.59E-06	1.76E-05	8	5	8	57	66	77	-2.777940378	-3.235725932	-2.572635134	0.07211716	0.228223241	0.364260364	Lag3	ENSMUSG00000030124	16768	lymphocyte-activation gene 3
ENSMUSG00000075502.1	chr14	79451835	79454816	+	Kbtbd6	-3.144115219	1.60E-06	1.77E-05	84	84	87	13	6	12	0.535476217	0.705721885	0.791113136	-2.018485389	-3.126619476	-2.268007851	Kbtbd6	ENSMUSG00000075502	432879	kelch repeat and BTB (POZ) domain containing 6
ENSMUSG00000021390.5	chr13	49608071	49624500	+	Ogn	-3.241960829	1.60E-06	1.77E-05	76	63	66	7	11	5	0.391984623	0.293527136	0.39518446	-2.866482296	-2.303497238	-3.452432422	Ogn	ENSMUSG00000021390	18295	osteoglycin
ENSMUSG00000026281.15	chr1	93792576	93801934	-	Dtymk	-0.599659566	1.60E-06	1.77E-05	3080	2743	2777	2005	1930	2132	5.723545601	5.726644309	5.779473221	5.196373359	5.087699645	5.146465985	Dtymk	ENSMUSG00000026281	21915	deoxythymidylate kinase
ENSMUSG00000030878.11	chr7	120957036	120982312	-	Cdr2	-0.989069654	1.61E-06	1.77E-05	762	769	670	394	414	377	3.709190308	3.892619965	3.728995546	2.850508599	2.868169097	2.648468793	Cdr2	ENSMUSG00000030878	12585	cerebellar degeneration-related 2
ENSMUSG00000025504.13	chr7	141338880	141363020	+	Eps8l2	2.22944097	1.61E-06	1.78E-05	29	32	42	184	165	165	-0.98276017	-0.672789738	-0.25070704	1.754104115	1.543628212	1.458823366	Eps8l2	ENSMUSG00000025504	98845	EPS8-like 2
ENSMUSG00000097722.1	chr2	152694733	152696692	-	Gm26841	0.621759378	1.61E-06	1.78E-05	1966	1811	1832	2963	3155	3109	5.076011252	5.127811539	5.179499507	5.759713451	5.796593714	5.690602861	NA	NA	NA	NA
ENSMUSG00000048109.10	chr3	107325421	107333673	-	Rbm15	-0.542095007	1.61E-06	1.78E-05	6898	6062	5831	4329	4477	4987	6.886663764	6.870539576	6.849553335	6.306611816	6.301418523	6.372237085	Rbm15	ENSMUSG00000048109	229700	RNA binding motif protein 15
ENSMUSG00000031732.12	chr8	109868542	109944671	+	Phlpp2	-1.164668624	1.62E-06	1.78E-05	499	524	464	247	211	251	3.098937648	3.339641411	3.199436811	2.177911824	1.897454659	2.062550549	Phlpp2	ENSMUSG00000031732	244650	PH domain and leucine rich repeat protein phosphatase 2
ENSMUSG00000033306.14	chr16	24393350	24992576	+	Lpp	0.952586683	1.62E-06	1.78E-05	253	241	225	462	491	536	2.120438718	2.220721828	2.156885648	3.079936664	3.113988412	3.15557032	Lpp	ENSMUSG00000033306	210126	LIM domain containing preferred translocation partner in lipoma
ENSMUSG00000023923.9	chr17	50733127	51179349	-	Tbc1d5	0.726927521	1.62E-06	1.79E-05	1310	1060	1108	2087	1935	2122	4.490498419	4.355371354	4.454295079	5.254187591	5.091431398	5.139684798	Tbc1d5	ENSMUSG00000023923	72238	TBC1 domain family, member 5
ENSMUSG00000046971.7	chr2	120299957	120314165	-	Pla2g4f	-4.253236105	1.62E-06	1.79E-05	99	88	85	4	2	11	0.771221401	0.772447999	0.757754539	-3.60344789	-4.505131099	-2.388302085	Pla2g4f	ENSMUSG00000046971	271844	phospholipase A2, group IVF
ENSMUSG00000035125.10	chr6	81923669	81959915	+	Gcfc2	-0.770094349	1.64E-06	1.80E-05	1020	906	864	529	614	606	4.129657248	4.129005659	4.095624178	3.275113983	3.436210006	3.332499794	Gcfc2	ENSMUSG00000035125	330361	GC-rich sequence DNA binding factor 2
ENSMUSG00000064796.1	chr3	96414437	96414859	-	Terc	-0.813702936	1.65E-06	1.81E-05	3083	3113	3185	1946	1793	1971	5.724949912	5.909164013	5.977206146	5.153293738	4.981502836	5.033213954	Terc	ENSMUSG00000064796	21748	telomerase RNA component
ENSMUSG00000020392.8	chr11	51967661	51977334	+	Cdkn2aipnl	-0.546641145	1.66E-06	1.82E-05	6381	5614	5570	3944	4317	4601	6.774276641	6.759784283	6.783493137	6.172253831	6.248921268	6.256024472	Cdkn2aipnl	ENSMUSG00000020392	52626	CDKN2A interacting protein N-terminal like
ENSMUSG00000026640.12	chr1	194618218	194816869	+	Plxna2	0.947767039	1.66E-06	1.82E-05	409	318	314	716	715	710	2.812316422	2.619992011	2.636818231	3.711450003	3.655748762	3.560826798	Plxna2	ENSMUSG00000026640	18845	plexin A2
ENSMUSG00000034111.5	chr12	87166242	87200229	-	Tmed8	-0.628820183	1.66E-06	1.82E-05	2063	1762	1718	1193	1311	1323	5.145474504	5.088249991	5.086836161	4.44760996	4.529942898	4.458278439	Tmed8	ENSMUSG00000034111	382620	transmembrane p24 trafficking protein 8
ENSMUSG00000045382.6	chr1	128588199	128592293	-	Cxcr4	-5.810688896	1.67E-06	1.82E-05	117	71	95	0	2	4	1.011113727	0.464713786	0.917330852	-6.773372891	-4.505131099	-3.741939039	Cxcr4	ENSMUSG00000045382	12767	chemokine (C-X-C motif) receptor 4
ENSMUSG00000105827.1	chr3	96269752	96270132	+	Hist2h2bb	-1.616263761	1.67E-06	1.82E-05	21572	18502	16932	6091	5046	9332	8.531502538	8.480275045	8.3874094	6.799208921	6.474008244	7.276183847	Hist2h2bb	ENSMUSG00000105827	319189	histone cluster 2, H2bb
ENSMUSG00000049303.10	chr19	4445908	4477447	-	Syt12	-1.296254003	1.67E-06	1.82E-05	292	251	239	117	116	107	2.326889595	2.279257039	2.24378387	1.103144055	1.03712695	0.836328809	Syt12	ENSMUSG00000049303	171180	synaptotagmin XII
ENSMUSG00000042743.13	chr13	104109741	104141735	+	Sgtb	1.257393808	1.67E-06	1.83E-05	249	214	228	539	526	714	2.097492786	2.049676286	2.175952379	3.302106258	3.213230527	3.56892616	Sgtb	ENSMUSG00000042743	218544	small glutamine-rich tetratricopeptide repeat (TPR)-containing, beta
ENSMUSG00000063450.14	chr12	75818134	76110926	+	Syne2	-1.661706743	1.67E-06	1.83E-05	244	226	271	71	90	88	2.068287436	2.128209689	2.424710412	0.386498445	0.672786693	0.555741509	Syne2	ENSMUSG00000063450	319565	spectrin repeat containing, nuclear envelope 2
ENSMUSG00000029314.14	chr5	100845713	100899102	+	Agpat9	1.60322936	1.68E-06	1.84E-05	148	89	134	353	398	437	1.348915901	0.788658226	1.411364387	2.692193513	2.81137672	2.861275166	Gpat3	ENSMUSG00000029314	231510	glycerol-3-phosphate acyltransferase 3
ENSMUSG00000033075.17	chr15	98038744	98093744	-	Senp1	-0.644629218	1.70E-06	1.85E-05	4215	3599	3521	2525	2689	2524	6.176084825	6.118423252	6.121876392	5.528980435	5.566063079	5.389917921	Senp1	ENSMUSG00000033075	223870	SUMO1/sentrin specific peptidase 1
ENSMUSG00000042210.16	chr9	106440051	106447678	-	Abhd14a	1.029477131	1.70E-06	1.85E-05	330	317	300	674	741	656	2.503103242	2.615455231	2.571123205	3.624301742	3.707243688	3.44678716	Abhd14a	ENSMUSG00000042210	68644	abhydrolase domain containing 14A
ENSMUSG00000022221.13	chr14	55784996	55788857	-	Ripk3	0.607742297	1.71E-06	1.86E-05	4425	3976	3648	6469	6122	7023	6.246221528	6.262125904	6.172989763	6.88606561	6.752845959	6.866110388	Ripk3	ENSMUSG00000022221	56532	receptor-interacting serine-threonine kinase 3
ENSMUSG00000071516.2	chr13	21716422	21716814	+	Hist1h2ai	-2.760674957	1.71E-06	1.86E-05	251	273	291	49	58	27	2.109011371	2.400239472	2.527254097	-0.144016271	0.043305525	-1.130504327	Hist1h2ai	ENSMUSG00000071516	319191	histone cluster 1, H2ai
ENSMUSG00000021701.7	chr13	110395044	110400844	+	Plk2	0.878039988	1.71E-06	1.86E-05	675	520	569	1029	1144	1292	3.53440874	3.328596802	3.493454056	4.234355223	4.333442553	4.424084524	Plk2	ENSMUSG00000021701	20620	polo like kinase 2
ENSMUSG00000034041.4	chr8	84701457	84704715	+	Lyl1	-0.82849195	1.71E-06	1.86E-05	2361	2246	2178	1457	1342	1294	5.340084601	5.438305795	5.429021422	4.735907277	4.563647179	4.426315209	Lyl1	ENSMUSG00000034041	17095	lymphoblastomic leukemia 1
ENSMUSG00000027995.10	chr3	83836272	83841767	-	Tlr2	-0.521625735	1.71E-06	1.86E-05	13400	11722	11216	8617	8830	9579	7.844595992	7.821835107	7.793236971	7.299680787	7.281220219	7.313870601	Tlr2	ENSMUSG00000027995	24088	toll-like receptor 2
ENSMUSG00000069266.5	chr13	23757013	23757409	+	Hist1h4b	-1.956144151	1.72E-06	1.86E-05	479	431	404	87	103	188	3.039983786	3.058059198	2.999897917	0.67783822	0.866427763	1.646556672	Hist1h4b	ENSMUSG00000069266	326620	histone cluster 1, H4b
ENSMUSG00000006715.11	chr13	24751845	24761923	-	Gmnn	-0.925701477	1.73E-06	1.87E-05	870	902	800	477	444	526	3.900297268	4.122625571	3.984659617	3.125984032	2.968980414	3.12842568	Gmnn	ENSMUSG00000006715	57441	geminin
ENSMUSG00000007589.8	chr14	55679083	55681817	-	Tinf2	-0.687201103	1.73E-06	1.87E-05	1275	1189	1110	739	809	824	4.451443964	4.520982005	4.456895702	3.757033446	3.833828076	3.775511643	Tinf2	ENSMUSG00000007589	28113	Terf1 (TRF1)-interacting nuclear factor 2
ENSMUSG00000027611.12	chr2	155751117	155755471	+	Procr	1.344333134	1.72E-06	1.87E-05	988	764	799	1977	2033	3009	4.083693936	3.88321514	3.982856248	5.176089088	5.162690081	5.643444061	Procr	ENSMUSG00000027611	19124	protein C receptor, endothelial
ENSMUSG00000002985.16	chr7	19696109	19699188	-	Apoe	-1.12131579	1.73E-06	1.87E-05	381	319	339	154	182	174	2.710136028	2.62451457	2.747169789	1.498090136	1.684693459	1.535219185	Apoe	ENSMUSG00000002985	11816	apolipoprotein E
ENSMUSG00000019731.13	chr8	72480641	72492614	-	Slc35e1	-0.615705558	1.73E-06	1.87E-05	5394	5002	4889	3489	3670	3506	6.531870312	6.593275996	6.595373252	5.995431725	6.014701692	5.863951972	Slc35e1	ENSMUSG00000019731	270066	solute carrier family 35, member E1
ENSMUSG00000059277.12	chr7	143021784	143053686	-	R74862	2.118161861	1.77E-06	1.91E-05	27	20	29	115	120	119	-1.084043506	-1.337605547	-0.777454926	1.07837615	1.085830142	0.989002767	R74862	ENSMUSG00000059277	97423	expressed sequence R74862
ENSMUSG00000024833.14	chr19	5940543	5964206	-	Pola2	-0.556462475	1.77E-06	1.91E-05	4786	4355	4153	2986	3315	3364	6.359352175	6.393465079	6.360013863	5.770867115	5.867951545	5.804312365	Pola2	ENSMUSG00000024833	18969	polymerase (DNA directed), alpha 2
ENSMUSG00000046027.17	chr7	83631959	83653127	+	Stard5	-0.831013379	1.78E-06	1.92E-05	1166	1078	1036	686	591	698	4.322567373	4.37965291	4.357406425	3.649743019	3.381175164	3.536252265	Stard5	ENSMUSG00000046027	170460	StAR-related lipid transfer (START) domain containing 5
ENSMUSG00000087963.1	chr13	49684301	49684433	+	Gm25394	-1.130113169	1.78E-06	1.92E-05	837	675	642	393	309	352	3.844542161	3.704654408	3.667454668	2.846846934	2.446736405	2.549615406	NA	NA	NA	NA
ENSMUSG00000024856.10	chr19	4097182	4099019	+	Cdk2ap2	-0.661248254	1.79E-06	1.92E-05	2021	1968	1903	1255	1357	1372	5.115807269	5.247723446	5.234340879	4.520673422	4.579677288	4.510726393	Cdk2ap2	ENSMUSG00000024856	52004	CDK2-associated protein 2
ENSMUSG00000038059.6	chr18	60474193	60501983	-	Smim3	1.398196853	1.79E-06	1.93E-05	1214	921	1054	2717	2488	3908	4.380743555	4.152682805	4.382245404	5.634691429	5.454001477	6.020535282	Smim3	ENSMUSG00000038059	106878	small integral membrane protein 3
ENSMUSG00000073889.10	chr4	41699989	41769474	+	Il11ra1	-2.672870573	1.79E-06	1.93E-05	132	85	94	15	21	15	1.18444533	0.722694964	0.902144448	-1.819176581	-1.40079444	-1.95766773	Il11ra1	ENSMUSG00000073889	16157	interleukin 11 receptor, alpha chain 1
ENSMUSG00000025241.15	chr9	123789510	123851899	-	Fyco1	0.990722934	1.79E-06	1.93E-05	1937	1712	1837	3527	3461	4781	5.054577376	5.046730722	5.183430559	6.011057476	5.930122438	6.31138352	Fyco1	ENSMUSG00000025241	17281	FYVE and coiled-coil domain containing 1
ENSMUSG00000053062.15	chr16	84774123	84825928	+	Jam2	-1.69424549	1.80E-06	1.93E-05	402	426	334	95	129	164	2.787441754	3.04124438	2.725764425	0.804055937	1.189749093	1.450079733	Jam2	ENSMUSG00000053062	67374	junction adhesion molecule 2
ENSMUSG00000033147.16	chr3	101855776	101924453	-	Slc22a15	-1.263439371	1.80E-06	1.93E-05	332	289	304	116	135	162	2.511807311	2.482261987	2.590200442	1.090813253	1.255089847	1.432431867	Slc22a15	ENSMUSG00000033147	242126	solute carrier family 22 (organic anion/cation transporter), member 15
ENSMUSG00000028975.16	chr4	148960535	149099876	-	Pex14	0.625532905	1.80E-06	1.93E-05	1526	1378	1389	2283	2239	2565	4.710608655	4.733726001	4.780252143	5.383658183	5.301901757	5.413160269	Pex14	ENSMUSG00000028975	56273	peroxisomal biogenesis factor 14
ENSMUSG00000025986.6	chr1	46807544	46892852	-	Slc39a10	0.840727495	1.81E-06	1.94E-05	2016	1827	1619	2960	3768	3762	5.112234471	5.14049814	5.001234777	5.758252247	6.052715483	5.965611826	Slc39a10	ENSMUSG00000025986	227059	solute carrier family 39 (zinc transporter), member 10
ENSMUSG00000012123.15	chr4	134065912	134092504	+	Aim1l	1.07902108	1.82E-06	1.95E-05	764	572	649	1411	1312	1772	3.712969472	3.465974332	3.68308774	4.689640522	4.531042513	4.879705871	Crybg2	ENSMUSG00000012123	230806	crystallin beta-gamma domain containing 2
ENSMUSG00000040350.15	chr11	48826140	48852209	+	Trim7	-0.965417377	1.83E-06	1.96E-05	1329	1168	1280	610	639	830	4.511264843	4.495284468	4.662393562	3.480474594	3.493741355	3.785972317	Trim7	ENSMUSG00000040350	94089	tripartite motif-containing 7
ENSMUSG00000075029.6	chr13	23756203	23757620	-	4930558J22Rik	-1.973184643	1.84E-06	1.97E-05	426	392	374	76	95	168	2.870998712	2.921391293	2.888723933	0.484014951	0.750369634	1.48474074	4930558J22Rik	NA	218102	RIKEN cDNA 4930558J22 gene
ENSMUSG00000057219.11	chr11	115475667	115490467	+	Armc7	0.750618899	1.84E-06	1.97E-05	1206	1272	1194	2110	2225	2264	4.371208981	4.61829239	4.562093163	5.269996223	5.292854591	5.233112783	Armc7	ENSMUSG00000057219	276905	armadillo repeat containing 7
ENSMUSG00000036931.14	chr7	30421732	30428746	+	Nfkbid	0.604999251	1.84E-06	1.97E-05	2468	2375	2249	3647	3693	4209	5.40401571	5.51885794	5.475290676	6.059319371	6.023713668	6.127569125	Nfkbid	ENSMUSG00000036931	243910	nuclear factor of kappa light polypeptide gene enhancer in B cells inhibitor, delta
ENSMUSG00000032598.8	chr9	108808368	108818844	+	Nckipsd	0.90587309	1.86E-06	1.99E-05	970	1001	851	1943	1915	1790	4.057181183	4.272789155	4.073764744	5.151068501	5.076446116	4.894282762	Nckipsd	ENSMUSG00000032598	80987	NCK interacting protein with SH3 domain
ENSMUSG00000006050.11	chr18	36666681	36679366	-	Sra1	0.557611185	1.86E-06	1.99E-05	3538	2967	3066	4750	5095	5193	5.923518985	5.839874763	5.92227926	6.440490761	6.487948809	6.43062737	Cyfip1	ENSMUSG00000030447	20430	cytoplasmic FMR1 interacting protein 1
ENSMUSG00000024190.6	chr17	26505590	26508519	-	Dusp1	1.400198415	1.87E-06	2.00E-05	1670	1328	1333	3764	3291	5383	4.840661048	4.680424961	4.720904134	6.104869652	5.857470288	6.482464668	Dusp1	ENSMUSG00000024190	19252	dual specificity phosphatase 1
ENSMUSG00000030536.10	chr7	80711583	80825974	-	Iqgap1	0.531758475	1.87E-06	2.00E-05	24069	20202	20531	31703	33339	34932	8.689515333	8.607088662	8.665453436	9.178981608	9.197885653	9.180418234	Iqgap1	ENSMUSG00000030536	29875	IQ motif containing GTPase activating protein 1
ENSMUSG00000046603.15	chr9	122805539	122836334	+	Tcaim	0.844107183	1.89E-06	2.01E-05	852	742	750	1310	1468	1741	3.870152805	3.841089665	3.891610286	4.582528747	4.693068356	4.854250717	Tcaim	ENSMUSG00000046603	382117	T cell activation inhibitor, mitochondrial
ENSMUSG00000026009.14	chr1	60977927	61000320	+	Icos	-4.236781278	1.89E-06	2.01E-05	88	75	97	7	6	2	0.602202331	0.543247188	0.947232338	-2.866482296	-3.126619476	-4.589935946	Icos	ENSMUSG00000026009	54167	inducible T cell co-stimulator
ENSMUSG00000106431.1	chr3	96220501	96220641	+	Gm44492	-1.183759998	1.90E-06	2.02E-05	1947	2098	1810	872	1083	818	5.062004394	5.339985197	5.162074486	3.99563843	4.254424244	3.764974566	NA	NA	NA	NA
ENSMUSG00000030177.14	chr6	120324323	120364374	-	Ccdc77	-0.631331496	1.90E-06	2.02E-05	1868	1708	1743	1186	1224	1260	5.002261629	5.043356981	5.107672673	4.439123494	4.430917864	4.387916362	Ccdc77	ENSMUSG00000030177	67200	coiled-coil domain containing 77
ENSMUSG00000038048.7	chr17	57769570	58410342	+	Cntnap5c	1.742198596	1.90E-06	2.02E-05	313	166	281	939	813	893	2.426918413	1.684220816	2.476893136	4.10237646	3.840939341	3.891459878	Cntnap5c	ENSMUSG00000038048	620292	contactin associated protein-like 5C
ENSMUSG00000026728.9	chr2	13573927	13582826	+	Vim	0.532283677	1.92E-06	2.04E-05	34921	31162	31109	48827	48269	53185	9.226424689	9.232365806	9.264969612	9.802033401	9.731765068	9.786881315	Vim	ENSMUSG00000026728	22352	vimentin
ENSMUSG00000026121.13	chr1	36548639	36558349	-	Sema4c	-1.000743325	1.93E-06	2.05E-05	579	486	457	284	256	272	3.313261632	3.231138444	3.177529957	2.378911951	2.175755821	2.178248379	Sema4c	ENSMUSG00000026121	20353	sema domain, immunoglobulin domain (Ig), transmembrane domain (TM) and short cytoplasmic domain, (semaphorin) 4C
ENSMUSG00000032602.6	chr9	108662088	108684641	+	Slc25a20	0.587826671	1.93E-06	2.05E-05	1326	1193	1146	1895	1931	2060	4.508005741	4.5258253	4.502922664	5.11498985	5.088446768	5.096914707	Slc25a20	ENSMUSG00000032602	57279	solute carrier family 25 (mitochondrial carnitine/acylcarnitine translocase), member 20
ENSMUSG00000032202.11	chr9	73044854	73097629	+	Rab27a	-0.935746312	1.94E-06	2.05E-05	718	729	675	351	392	444	3.623441127	3.815606617	3.739713984	2.684007988	2.789489649	2.884175568	Rab27a	ENSMUSG00000032202	11891	RAB27A, member RAS oncogene family
ENSMUSG00000019590.16	chr11	105933702	105953336	-	Cyb561	1.62913726	1.94E-06	2.05E-05	69	67	78	247	238	224	0.253537853	0.381658046	0.634522773	2.177911824	2.070786262	1.898707594	Cyb561	ENSMUSG00000019590	13056	cytochrome b-561
ENSMUSG00000021671.8	chr13	96388294	96415587	+	Poc5	-0.641408377	1.96E-06	2.07E-05	1593	1403	1395	927	1034	1048	4.772580084	4.759655797	4.786468433	4.08383058	4.187658736	4.122247105	Poc5	ENSMUSG00000021671	67463	POC5 centriolar protein
ENSMUSG00000037860.15	chr1	173350879	173466040	+	Aim2	-0.643368402	1.96E-06	2.08E-05	2319	1865	1920	1358	1364	1443	5.314194912	5.170189094	5.247168273	4.634425959	4.587097485	4.583491351	Aim2	ENSMUSG00000037860	383619	absent in melanoma 2
ENSMUSG00000061559.15	chr9	54714735	54734519	-	Wdr61	0.612080564	1.99E-06	2.10E-05	4018	3468	3313	5533	5540	6586	6.107038147	6.064938618	6.034042228	6.660603683	6.608741268	6.773432279	Wdr61	ENSMUSG00000061559	66317	WD repeat domain 61
ENSMUSG00000102813.1	chr4	150068539	150070997	+	Gm37795	-0.908528052	2.00E-06	2.11E-05	1139	949	975	563	510	677	4.28878199	4.195866639	4.269900087	3.364898909	3.168707957	3.492213095	NA	NA	NA	NA
ENSMUSG00000105014.1	chr13	21716667	21716804	-	Gm44367	-2.492387485	2.00E-06	2.11E-05	127	134	126	21	35	19	1.128950218	1.376304811	1.322895599	-1.347108137	-0.677312075	-1.626461822	NA	NA	NA	NA
ENSMUSG00000097755.1	chr18	34751809	34758685	+	2010110K18Rik	-3.800911192	2.01E-06	2.12E-05	127	78	84	10	8	4	1.128950218	0.599463198	0.740781461	-2.381055469	-2.739596353	-3.741939039	2010110K18Rik	NA	100503082	RIKEN cDNA 2010110K18 gene
ENSMUSG00000039163.9	chr9	118064529	118150196	-	Cmc1	1.016115912	2.03E-06	2.14E-05	429	312	342	684	818	835	2.881111102	2.592554828	2.759862202	3.64553384	3.849779412	3.794631977	Cmc1	ENSMUSG00000039163	67899	COX assembly mitochondrial protein 1
ENSMUSG00000090946.3	chr12	32378704	32382943	+	Ccdc71l	0.712884376	2.05E-06	2.16E-05	1394	1274	1181	1972	2336	2452	4.580129	4.620558107	4.546305938	5.172436693	5.363074128	5.34817338	Ccdc71l	ENSMUSG00000090946	72123	coiled-coil domain containing 71 like
ENSMUSG00000078651.8	chr11	101325063	101329702	+	Aoc2	-0.949022803	2.07E-06	2.17E-05	605	516	503	307	305	287	3.37657993	3.317466988	3.315749992	2.491069709	2.427969375	2.255554105	Aoc2	ENSMUSG00000078651	237940	amine oxidase, copper containing 2 (retina-specific)
ENSMUSG00000025739.13	chr17	25717171	25719406	+	Gng13	-1.816800135	2.08E-06	2.18E-05	198	192	197	43	66	71	1.767591978	1.893557084	1.965610867	-0.330429396	0.228223241	0.248007296	Gng13	ENSMUSG00000025739	64337	guanine nucleotide binding protein (G protein), gamma 13
ENSMUSG00000062825.15	chr11	120345690	120348542	-	Actg1	0.630215256	2.07E-06	2.18E-05	10458	9447	8611	15462	16270	15349	7.48698511	7.510559347	7.411950865	8.143113083	8.162911772	7.99404	Actg1	ENSMUSG00000062825	11465	actin, gamma, cytoplasmic 1
ENSMUSG00000028282.12	chr4	32615451	32653265	+	Casp8ap2	-0.636553547	2.09E-06	2.20E-05	3324	2770	2590	1885	1906	2164	5.833518443	5.740773101	5.678916893	5.107358544	5.069651621	5.167954044	Casp8ap2	ENSMUSG00000028282	26885	caspase 8 associated protein 2
ENSMUSG00000089827.1	chr13	80884224	80885524	-	1700023H06Rik	-1.345978257	2.10E-06	2.20E-05	240	235	240	94	93	113	2.044489864	2.184425698	2.249795108	0.788869533	0.719835266	0.914684446	1700023H06Rik	NA	69442	RIKEN cDNA 1700023H06 gene
ENSMUSG00000022003.6	chr14	75761999	75787037	-	Slc25a30	-0.703379979	2.10E-06	2.21E-05	1257	1040	1112	720	736	778	4.430939465	4.327903699	4.459491645	3.719481729	3.697482521	3.692689188	Slc25a30	ENSMUSG00000022003	67554	solute carrier family 25, member 30
ENSMUSG00000032047.5	chr9	53580522	53610382	-	Acat1	0.56897207	2.12E-06	2.22E-05	7426	6949	6949	10352	11398	12144	6.993063515	7.067535917	7.102595492	7.564318691	7.649497169	7.656151433	Acat1	ENSMUSG00000032047	110446	acetyl-Coenzyme A acetyltransferase 1
ENSMUSG00000033740.17	chr1	6487231	6860940	+	St18	1.010349362	2.12E-06	2.22E-05	907	750	869	1649	1640	2178	3.960350614	3.85655071	4.103944242	4.914440171	4.852860684	5.177255357	St18	ENSMUSG00000033740	240690	suppression of tumorigenicity 18
ENSMUSG00000094377.1	chr5	115490254	115490394	+	Gm24407	-1.114933741	2.12E-06	2.22E-05	1410	1696	1481	707	789	759	4.596587731	5.033188164	4.872744935	3.693213446	3.797736262	3.657042114	NA	NA	NA	NA
ENSMUSG00000038663.7	chr7	81533308	81566944	-	Fsd2	-3.775319842	2.13E-06	2.22E-05	245	217	250	28	7	29	2.074175995	2.06971404	2.308568817	-0.940482877	-2.920168599	-1.029220991	Fsd2	ENSMUSG00000038663	244091	fibronectin type III and SPRY domain containing 2
ENSMUSG00000050737.13	chr2	30889471	30929863	-	Ptges	1.448310737	2.13E-06	2.23E-05	135	121	83	312	330	336	1.216745822	1.229654952	0.723606317	2.514339488	2.541447267	2.482598654	Ptges3	ENSMUSG00000071072	56351	prostaglandin E synthase 3
ENSMUSG00000069631.14	chr11	106163330	106202168	-	Strada	0.620363814	2.13E-06	2.23E-05	2083	1872	1771	3026	2928	3466	5.159390165	5.175592452	5.130657774	5.790061744	5.688886985	5.847400004	Strada	ENSMUSG00000069631	72149	STE20-related kinase adaptor alpha
ENSMUSG00000026981.15	chr2	24336853	24351494	+	Il1rn	2.018674883	2.14E-06	2.23E-05	106	77	120	392	367	552	0.869306401	0.580966854	1.25279136	2.843175952	2.694541245	3.197966613	Il1rn	ENSMUSG00000026981	16181	interleukin 1 receptor antagonist
ENSMUSG00000079227.9	chr9	124121543	124147699	+	Ccr5	2.193185705	2.14E-06	2.23E-05	24	17	19	103	100	95	-1.250693375	-1.565874534	-1.374695757	0.920114066	0.823992497	0.665564787	Ccr5	ENSMUSG00000079227	12774	chemokine (C-C motif) receptor 5
ENSMUSG00000024165.8	chr17	24942156	24960636	-	Hn1l	-0.516685115	2.14E-06	2.23E-05	9299	7991	7712	6027	6142	6471	7.317534215	7.269093055	7.252884893	6.783971139	6.757551043	6.748020391	Jpt2	ENSMUSG00000024165	52009	Jupiter microtubule associated homolog 2
ENSMUSG00000030148.15	chr6	123106428	123143999	+	Clec4a2	1.999099713	2.14E-06	2.23E-05	68	82	89	338	387	296	0.232628864	0.671164663	0.823717802	2.629639132	2.770993306	2.300024254	Clec4a2	ENSMUSG00000030148	26888	C-type lectin domain family 4, member a2
ENSMUSG00000103676.1	chr1	170973373	170977746	+	Gm38204	-3.434310601	2.14E-06	2.23E-05	29	34	31	3	2	3	-0.98276017	-0.586633094	-0.682818052	-3.966017969	-4.505131099	-4.104509119	NA	NA	NA	NA
ENSMUSG00000022947.7	chr16	93683215	93690990	+	Cbr3	2.042364315	2.16E-06	2.25E-05	48	64	47	250	243	207	-0.265490377	0.316069704	-0.090242367	2.195293902	2.100718768	1.785103485	Cbr3	ENSMUSG00000022947	109857	carbonyl reductase 3
ENSMUSG00000087819.1	chr10	111481493	111481636	+	Gm25117	-0.995131178	2.17E-06	2.26E-05	945	799	806	442	390	543	4.019530429	3.947796672	3.995432747	3.016160754	2.782119544	3.174272184	NA	NA	NA	NA
ENSMUSG00000016984.7	chr11	17938756	17953875	-	Etaa1	-1.307262086	2.18E-06	2.26E-05	475	412	431	222	184	168	3.027898312	2.993092758	3.093118773	2.024288634	1.700417812	1.48474074	Etaa1	ENSMUSG00000016984	68145	Ewing tumor-associated antigen 1
ENSMUSG00000032239.9	chr9	22448311	22468356	-	Rp9	0.762397513	2.19E-06	2.27E-05	1551	1500	1516	2581	2567	3166	4.734044762	4.856070052	4.906431807	5.560620991	5.499089367	5.716809323	Rp9	ENSMUSG00000032239	55934	retinitis pigmentosa 9 (human)
ENSMUSG00000022749.6	chr16	57168866	57231466	-	Tbc1d23	0.631760716	2.20E-06	2.29E-05	4059	3763	3425	5519	6474	6667	6.12168311	6.182701705	6.082000894	6.656948975	6.833493874	6.791066164	Tbc1d23	ENSMUSG00000022749	67581	TBC1 domain family, member 23
ENSMUSG00000001942.7	chr9	37613847	37648318	+	Siae	0.668614381	2.21E-06	2.29E-05	1016	943	871	1458	1604	1752	4.123991281	4.186721156	4.107258878	4.736896779	4.82084888	4.863334688	Siae	ENSMUSG00000001942	22619	sialic acid acetylesterase
ENSMUSG00000035900.18	chr15	86057695	86137634	+	Gramd4	0.616995316	2.22E-06	2.29E-05	1641	1436	1490	2437	2542	2504	4.815395815	4.793184726	4.881482684	5.477813612	5.484972864	5.378442855	Gramd4	ENSMUSG00000035900	223752	GRAM domain containing 4
ENSMUSG00000031026.15	chr7	109449006	109508134	-	Trim66	-2.902220713	2.22E-06	2.30E-05	84	78	88	7	13	16	0.535476217	0.599463198	0.807507574	-2.866482296	-2.072171692	-1.867469921	Trim66	ENSMUSG00000031026	330627	tripartite motif-containing 66
ENSMUSG00000094942.7	chr13	62368328	62383177	-	Gm3604	4.798772171	2.23E-06	2.30E-05	0	1	1	22	30	42	-6.865403219	-5.11019505	-5.075135475	-1.281519795	-0.896321857	-0.502473105	Gm3604	ENSMUSG00000094942	100041979	predicted gene 3604
ENSMUSG00000026473.15	chr1	153899944	153909723	+	Glul	-0.672197457	2.25E-06	2.32E-05	1779	1646	1602	1001	1150	1228	4.931852998	4.990029245	4.986010666	4.194573814	4.340986074	4.350818102	Glul	ENSMUSG00000026473	14645	glutamate-ammonia ligase (glutamine synthetase)
ENSMUSG00000031697.12	chr8	85299632	85308278	+	Orc6	-0.778324929	2.25E-06	2.32E-05	1813	1635	1512	987	925	1188	4.959157811	4.980358493	4.902621451	4.174264047	4.027029986	4.303062147	Orc6	ENSMUSG00000031697	56452	origin recognition complex, subunit 6
ENSMUSG00000032383.6	chr9	66060169	66066629	+	Ppib	0.593483143	2.27E-06	2.34E-05	13910	13443	12259	19964	22238	21713	7.898483437	8.019463619	7.921514544	8.511776429	8.613712666	8.494440631	Ppib	ENSMUSG00000032383	19035	peptidylprolyl isomerase B
ENSMUSG00000020108.3	chr10	59949675	59951770	-	Ddit4	-1.444111539	2.27E-06	2.34E-05	1465	1374	1330	614	634	423	4.651774033	4.72953364	4.717654819	3.489896309	3.48241716	2.814354118	Ddit4	ENSMUSG00000020108	74747	DNA-damage-inducible transcript 4
ENSMUSG00000031442.20	chr8	12873806	13020905	+	Mcf2l	-0.946687498	2.28E-06	2.35E-05	1083	875	838	531	450	570	4.216080219	4.078805817	4.051568998	3.28055299	2.988324101	3.244219035	Mcf2l	ENSMUSG00000031442	17207	mcf.2 transforming sequence-like
ENSMUSG00000027160.16	chr2	110017817	110173360	+	Ccdc34	-0.975584996	2.29E-06	2.36E-05	2242	2037	2266	1227	1010	1339	5.265489051	5.297426793	5.48615247	4.488134418	4.153794412	4.475614825	Ccdc34	ENSMUSG00000027160	68201	coiled-coil domain containing 34
ENSMUSG00000038766.16	chr3	95181766	95217916	-	Gabpb2	-0.602072475	2.30E-06	2.36E-05	9109	7493	7567	5494	5288	6221	7.287752935	7.176266451	7.225503079	6.650399595	6.541583673	6.691182699	Gabpb2	ENSMUSG00000038766	213054	GA repeat binding protein, beta 2
ENSMUSG00000015452.14	chr17	34597862	34600936	+	Ager	-1.686025494	2.30E-06	2.37E-05	262	218	221	98	65	73	2.170770393	2.076331918	2.131064913	0.848678928	0.206363807	0.287808304	Ager	ENSMUSG00000015452	11596	advanced glycosylation end product-specific receptor
ENSMUSG00000068566.12	chr7	3289080	3300442	+	Myadm	0.698296017	2.32E-06	2.39E-05	4857	4301	4490	7636	7143	8990	6.380595061	6.375466571	6.472562401	7.12532296	6.975356195	7.222321596	Myadm	ENSMUSG00000068566	50918	myeloid-associated differentiation marker
ENSMUSG00000062906.12	chr15	89123307	89128700	-	Hdac10	-0.627476893	2.32E-06	2.39E-05	2389	2061	2027	1484	1389	1608	5.357089833	5.314321195	5.325388223	4.762388487	4.613290925	4.73963618	Hdac10	ENSMUSG00000062906	170787	histone deacetylase 10
ENSMUSG00000031844.8	chr8	117701904	117759027	+	Hsd17b2	3.37264359	2.33E-06	2.39E-05	3	4	4	50	39	48	-4.058048297	-3.52523255	-3.490172974	-0.115161409	-0.523278446	-0.311951199	Hsd17b2	ENSMUSG00000031844	15486	hydroxysteroid (17-beta) dehydrogenase 2
ENSMUSG00000020553.8	chr11	89982665	90002894	-	Pctp	0.916808312	2.33E-06	2.39E-05	513	506	422	870	933	1109	3.138817247	3.289260908	3.062709555	3.992327596	4.039447018	4.203829911	Pctp	ENSMUSG00000020553	18559	phosphatidylcholine transfer protein
ENSMUSG00000042790.15	chr9	45863425	45906894	-	Rnf214	0.584495027	2.33E-06	2.39E-05	1946	1682	1744	2849	2781	2975	5.06126341	5.021233238	5.108499906	5.703120186	5.614588196	5.627052362	Rnf214	ENSMUSG00000042790	235315	ring finger protein 214
ENSMUSG00000060671.12	chr3	89939481	89963508	-	Atp8b2	0.598460938	2.33E-06	2.39E-05	6002	5609	5126	8867	9282	8909	6.685944564	6.758498916	6.663660504	7.340938818	7.3532385	7.209264714	Atp8b2	ENSMUSG00000060671	54667	ATPase, class I, type 8B, member 2
ENSMUSG00000037071.2	chr19	44394451	44407709	-	Scd1	-0.669326663	2.34E-06	2.39E-05	1495	1400	1352	916	987	952	4.681008976	4.756568717	4.741314903	4.066618179	4.120577744	3.983711242	Scd1	ENSMUSG00000037071	20249	stearoyl-Coenzyme A desaturase 1
ENSMUSG00000004371.14	chr7	4772373	4782857	-	Il11	2.486801371	2.35E-06	2.40E-05	15	12	10	74	82	72	-1.911206909	-2.051301361	-2.267780553	0.445795629	0.53926302	0.268045049	Il11	ENSMUSG00000004371	16156	interleukin 11
ENSMUSG00000026939.12	chr2	25620067	25622005	-	Tmem141	0.624332785	2.37E-06	2.42E-05	1033	924	850	1460	1537	1624	4.147919454	4.157371958	4.07206945	4.738873751	4.759311501	4.753915987	Tmem141	ENSMUSG00000026939	51875	transmembrane protein 141
ENSMUSG00000019876.15	chr10	57631981	57741112	+	Pkib	-1.251800857	2.37E-06	2.42E-05	414	307	329	142	174	154	2.829825072	2.569285049	2.704036679	1.381445218	1.620024032	1.359598987	Pkib	ENSMUSG00000019876	18768	protein kinase inhibitor beta, cAMP dependent, testis specific
ENSMUSG00000001552.14	chr11	100368958	100397763	-	Jup	1.879969212	2.38E-06	2.43E-05	43	44	36	169	172	148	-0.422459723	-0.21942412	-0.470273417	1.631768572	1.603393357	1.30245508	Jup	ENSMUSG00000001552	16480	junction plakoglobin
ENSMUSG00000015656.16	chr9	40800984	40805200	+	Hspa8	0.549095346	2.39E-06	2.44E-05	101058	89919	87743	133382	149011	153835	10.75942793	10.76118884	10.76090666	11.25183698	11.35800496	11.3191649	Hspa8	ENSMUSG00000015656	15481	heat shock protein 8
ENSMUSG00000001576.14	chr17	26561489	26656931	+	Ergic1	0.811078439	2.39E-06	2.44E-05	5409	4689	4500	8709	8003	10830	6.535876317	6.500060843	6.475771601	7.315001291	7.139356131	7.490948187	Ergic1	ENSMUSG00000001576	67458	endoplasmic reticulum-golgi intermediate compartment (ERGIC) 1
ENSMUSG00000030309.16	chr6	148842492	148896237	-	Caprin2	-1.282436245	2.40E-06	2.44E-05	348	291	304	152	117	147	2.579611627	2.492194522	2.590200442	1.479292541	1.049457752	1.292707103	Caprin2	ENSMUSG00000030309	232560	caprin family member 2
ENSMUSG00000029638.17	chr6	8509600	8597548	+	Glcci1	1.134561442	2.40E-06	2.44E-05	414	287	278	763	690	828	2.829825072	2.472260595	2.461435542	3.803111455	3.60443841	3.782493846	Glcci1	ENSMUSG00000029638	170772	glucocorticoid induced transcript 1
ENSMUSG00000021607.8	chr13	73331009	73332175	+	Mrpl36	0.655099487	2.41E-06	2.45E-05	1046	944	938	1626	1664	1638	4.165953377	4.188249435	4.214114959	4.894182216	4.873813961	4.766295917	Mrpl36	ENSMUSG00000021607	94066	mitochondrial ribosomal protein L36
ENSMUSG00000034007.9	chr9	55549883	55919605	-	Scaper	0.993525665	2.41E-06	2.45E-05	674	518	655	1183	1412	1323	3.532271414	3.323042628	3.696353994	4.435471099	4.636975958	4.458278439	Scaper	ENSMUSG00000034007	244891	S phase cyclin A-associated protein in the ER
ENSMUSG00000056904.3	chr9	91097149	91098496	+	Gm5620	-0.770664913	2.44E-06	2.48E-05	977	939	846	551	542	638	4.067549673	4.1805918	4.065268282	3.333844184	3.256420133	3.406678769	Gm5620	NA	434428	tubulin, alpha 1B pseudogene
ENSMUSG00000028458.12	chr4	43441939	43448064	+	Tesk1	0.537059398	2.47E-06	2.50E-05	5070	4701	4450	7304	7072	7678	6.442509083	6.503747851	6.459653736	7.061196916	6.960945362	6.994744751	Tesk1	ENSMUSG00000028458	21754	testis specific protein kinase 1
ENSMUSG00000052557.11	chr8	117158135	117215997	+	Gan	0.80011365	2.47E-06	2.50E-05	2501	2123	2269	3982	3865	5054	5.423174518	5.357070842	5.488060797	6.186085755	6.089380128	6.391488629	Gan	ENSMUSG00000052557	209239	giant axonal neuropathy
ENSMUSG00000079038.3	chr8	69271080	69314207	+	D130040H23Rik	1.982147497	2.48E-06	2.52E-05	30	22	22	96	102	118	-0.934665882	-1.203304455	-1.168244879	0.819084146	0.852420905	0.976879208	D130040H23Rik	ENSMUSG00000079038	211135	RIKEN cDNA D130040H23 gene
ENSMUSG00000031971.15	chr8	123840831	123860209	-	Ccsap	-1.994659648	2.49E-06	2.52E-05	275	192	231	80	56	53	2.240505289	1.893557084	2.194770408	0.557543987	-0.006880232	-0.170397054	Ccsap	ENSMUSG00000031971	73420	centriole, cilia and spindle associated protein
ENSMUSG00000056124.5	chr18	20684599	20746404	-	B4galt6	0.72204048	2.51E-06	2.54E-05	1058	869	921	1636	1740	1640	4.182402335	4.068884666	4.18774238	4.903024996	4.938226904	4.768055838	B4galt6	ENSMUSG00000056124	56386	UDP-Gal:betaGlcNAc beta 1,4-galactosyltransferase, polypeptide 6
ENSMUSG00000025237.15	chr9	59617284	59650290	+	Parp6	0.717620192	2.52E-06	2.55E-05	1070	983	1002	1638	1714	2035	4.198665861	4.246623691	4.309288546	4.904787066	4.916512995	5.079303465	Parp6	ENSMUSG00000025237	67287	poly (ADP-ribose) polymerase family, member 6
ENSMUSG00000030935.15	chr7	119760923	119787513	+	Acsm3	-1.454286534	2.52E-06	2.55E-05	401	318	308	100	149	155	2.783852958	2.619992011	2.609028703	0.8776788	1.39694248	1.368906729	Acsm3	ENSMUSG00000030935	20216	acyl-CoA synthetase medium-chain family member 3
ENSMUSG00000059183.12	chr9	65435782	65453054	+	Mtfmt	0.656768727	2.52E-06	2.55E-05	1656	1329	1330	2222	2369	2673	4.828519269	4.681510511	4.717654819	5.344594812	5.383307751	5.472649921	Mtfmt	ENSMUSG00000059183	69606	mitochondrial methionyl-tRNA formyltransferase
ENSMUSG00000034126.4	chr12	87106866	87147902	-	Pomt2	-0.627421341	2.53E-06	2.55E-05	2486	2181	2136	1567	1598	1539	5.414497496	5.395947207	5.400935626	4.840876836	4.815443834	4.676382111	Pomt2	ENSMUSG00000034126	217734	protein-O-mannosyltransferase 2
ENSMUSG00000055850.12	chr6	72359714	72366956	-	Rnf181	-0.542768457	2.53E-06	2.55E-05	4310	3645	3749	2701	2791	3092	6.208236291	6.136743435	6.212384532	5.626172075	5.619765646	5.682693839	Rnf181	ENSMUSG00000055850	66510	ring finger protein 181
ENSMUSG00000018378.13	chr11	88098058	88194140	+	Cuedc1	0.812940281	2.53E-06	2.55E-05	527	489	496	975	890	977	3.177624064	3.240007498	3.295551932	4.156625171	3.971412607	4.021088851	Cuedc1	ENSMUSG00000018378	103841	CUE domain containing 1
ENSMUSG00000030284.11	chr6	113483297	113493343	+	Creld1	0.871824352	2.55E-06	2.57E-05	1790	1684	1758	3359	2980	3958	4.940743584	5.022947162	5.120031644	5.940657924	5.714279464	6.038874095	Creld1	ENSMUSG00000030284	171508	cysteine-rich with EGF-like domains 1
ENSMUSG00000001473.6	chr18	67390717	67402748	+	Tubb6	-0.739481924	2.56E-06	2.57E-05	11871	11900	11435	7406	7986	7184	7.669811396	7.843577018	7.821133851	7.08120334	7.136288486	6.898808001	Tubb6	ENSMUSG00000001473	67951	tubulin, beta 6 class V
ENSMUSG00000079470.8	chr1	78658038	78671512	+	Utp14b	-0.784139473	2.56E-06	2.57E-05	1579	1365	1428	813	852	1059	4.759849002	4.720056048	4.820187345	3.894625644	3.90849683	4.137303832	Utp14b	ENSMUSG00000079470	195434	UTP14B small subunit processome component
ENSMUSG00000100556.1	chr1	75272605	75275652	+	Gm28902	3.707717737	2.57E-06	2.58E-05	7	2	5	71	60	66	-2.958512624	-4.373229456	-3.200666357	0.386498445	0.091804043	0.143418395	NA	NA	NA	NA
ENSMUSG00000079659.5	chr5	9100668	9160986	+	Tmem243	-0.732107073	2.58E-06	2.59E-05	2328	1917	1996	1236	1242	1546	5.319781948	5.209853311	5.303159381	4.498673633	4.451970942	4.682927077	Tmem243	ENSMUSG00000079659	652925	transmembrane protein 243, mitochondrial
ENSMUSG00000028565.18	chr4	97772734	98118874	+	Nfia	3.002066788	2.59E-06	2.60E-05	76	65	57	560	407	791	0.391984623	0.33826545	0.185392075	3.357197671	2.843597055	3.716581499	Nfia	ENSMUSG00000028565	18027	nuclear factor I/A
ENSMUSG00000011114.17	chr9	37649182	37657312	-	Tbrg1	0.75125836	2.60E-06	2.61E-05	7238	6526	6406	11285	13548	11554	6.956071831	6.976936251	6.985222708	7.688809826	7.89878632	7.58430317	Tbrg1	ENSMUSG00000011114	21376	transforming growth factor beta regulated gene 1
ENSMUSG00000029581.14	chr5	142960343	142973185	+	Fscn1	2.611667525	2.60E-06	2.61E-05	21	31	23	183	130	182	-1.439138465	-0.717877628	-1.105509124	1.746263361	1.200846802	1.599888613	Fscn1	ENSMUSG00000029581	14086	fascin actin-bundling protein 1
ENSMUSG00000031935.8	chr9	15260352	15279867	-	Med17	0.592200045	2.63E-06	2.64E-05	3785	3189	3034	4965	5624	5507	6.020864934	5.943957012	5.90714513	6.50435039	6.630449941	6.515317834	Med17	ENSMUSG00000031935	234959	mediator complex subunit 17
ENSMUSG00000046994.9	chr1	55237177	55248470	+	Mars2	-0.837677367	2.63E-06	2.64E-05	1194	976	958	626	654	589	4.356787919	4.236318683	4.244536646	3.517797808	3.527190188	3.291483962	Mars2	ENSMUSG00000046994	212679	methionine-tRNA synthetase 2 (mitochondrial)
ENSMUSG00000050936.5	chr3	96269721	96279001	+	Gm42743	-1.600019575	2.65E-06	2.65E-05	21099	17939	16467	5999	4900	9307	8.499517972	8.435694509	8.347235954	6.777253664	6.431654046	7.272313955	NA	NA	NA	NA
ENSMUSG00000050350.7	chr14	121911435	121915774	-	Gpr18	-1.780528925	2.67E-06	2.67E-05	240	245	244	95	72	63	2.044489864	2.244421663	2.273592679	0.804055937	0.352849896	0.076820646	Gpr18	ENSMUSG00000050350	110168	G protein-coupled receptor 18
ENSMUSG00000059089.4	chr1	171018920	171029761	+	Fcgr4	-0.970873032	2.67E-06	2.67E-05	677	595	608	317	305	408	3.538673917	3.522800147	3.589015477	2.53723989	2.427969375	2.762328227	Fcgr4	ENSMUSG00000059089	246256	Fc receptor, IgG, low affinity IV
ENSMUSG00000022369.13	chr15	55557408	55626423	+	Mtbp	-0.798170218	2.68E-06	2.67E-05	2327	1857	1937	1159	1143	1468	5.319162233	5.163988944	5.259882619	4.405914213	4.332181456	4.608263509	Mtbp	ENSMUSG00000022369	105837	Mdm2, transformed 3T3 cell double minute p53 binding protein
ENSMUSG00000049502.16	chr16	35926511	35939151	-	Dtx3l	-0.769003096	2.68E-06	2.68E-05	3215	2912	2520	1557	1924	1946	5.785424155	5.812884783	5.639396263	4.831643557	5.083208761	5.014802589	Dtx3l	ENSMUSG00000049502	209200	deltex 3-like, E3 ubiquitin ligase
ENSMUSG00000042557.14	chr9	57072040	57128366	+	Sin3a	0.788988811	2.69E-06	2.68E-05	6030	5368	5256	9547	9144	12307	6.692658689	6.695145778	6.699788821	7.447534408	7.331629379	7.675386078	Sin3a	ENSMUSG00000042557	20466	transcriptional regulator, SIN3A (yeast)
ENSMUSG00000034601.16	chr12	71136848	71243303	+	2700049A03Rik	-0.631660623	2.70E-06	2.70E-05	1448	1371	1299	894	927	1021	4.63494075	4.726381356	4.683642943	4.031564781	4.030144277	4.084609448	2700049A03Rik	ENSMUSG00000034601	76967	RIKEN cDNA 2700049A03 gene
ENSMUSG00000071064.13	chr8	79028437	79193766	+	Zfp827	0.628229076	2.70E-06	2.70E-05	1445	1319	1307	2234	2095	2404	4.631949674	4.670618084	4.692497255	5.352363438	5.206019612	5.31965717	Zfp827	ENSMUSG00000071064	622675	zinc finger protein 827
ENSMUSG00000028420.13	chr4	53826045	53862019	+	Tmem38b	-0.753807841	2.71E-06	2.70E-05	2160	2036	1804	1250	1346	1207	5.211746296	5.296718548	5.157285452	4.514916451	4.56793932	4.325943433	Tmem38b	ENSMUSG00000028420	52076	transmembrane protein 38B
ENSMUSG00000030792.8	chr7	45207519	45212147	-	Dkkl1	2.017430251	2.72E-06	2.71E-05	36	33	34	168	127	159	-0.67557866	-0.629068361	-0.551573519	1.62323189	1.167294243	1.405548573	Dkkl1	ENSMUSG00000030792	50722	dickkopf-like 1
ENSMUSG00000030970.16	chr7	132987563	133124354	-	Ctbp2	0.585267252	2.73E-06	2.72E-05	2964	2671	2540	4315	4059	4747	5.668169862	5.688276751	5.650798773	6.301939115	6.160027135	6.301088244	Ctbp2	ENSMUSG00000030970	13017	C-terminal binding protein 2
ENSMUSG00000104574.1	chr3	122426443	122459060	-	Gm42836	3.322125726	2.74E-06	2.73E-05	9	16	9	108	154	107	-2.617475706	-1.650763432	-2.412170462	0.988178341	1.444403834	0.836328809	NA	NA	NA	NA
ENSMUSG00000022718.11	chr16	18253948	18289249	-	Dgcr8	-0.504306747	2.75E-06	2.73E-05	5178	4785	4616	3512	3606	3872	6.472915334	6.529296402	6.512485796	6.004909619	5.989324514	6.007185483	Dgcr8	ENSMUSG00000022718	94223	DGCR8, microprocessor complex subunit
ENSMUSG00000031365.13	chrX	73342621	73359080	+	Zfp275	-0.599330237	2.75E-06	2.73E-05	2103	1757	1721	1284	1274	1371	5.173172883	5.084151423	5.08935249	4.553618283	4.488656464	4.509674866	Zfp275	ENSMUSG00000031365	27081	zinc finger protein 275
ENSMUSG00000086539.8	chr9	63398601	63568691	+	Gm16759	0.974226084	2.76E-06	2.74E-05	278	224	235	480	486	584	2.256130298	2.115414084	2.219485274	3.135019729	3.0992368	3.279195174	Gm16759	NA	102639582	predicted gene, 16759
ENSMUSG00000053007.9	chr6	53287270	53700376	+	9430076C15Rik	-1.628762809	2.77E-06	2.75E-05	326	238	254	74	88	123	2.485535962	2.202687905	2.33142387	0.445795629	0.640546356	1.036503191	Creb5	ENSMUSG00000053007	231991	cAMP responsive element binding protein 5
ENSMUSG00000037885.18	chr2	129800517	129832287	+	Stk35	-0.625918405	2.78E-06	2.75E-05	2444	2109	2018	1519	1528	1497	5.389920471	5.347527821	5.318969896	4.796008068	4.750841643	4.636476247	Stk35	ENSMUSG00000037885	67333	serine/threonine kinase 35
ENSMUSG00000030486.9	chr7	24254794	24262445	+	Zfp108	-3.540435024	2.79E-06	2.76E-05	132	85	104	9	5	17	1.18444533	0.722694964	1.047261156	-2.525445378	-3.367627576	-1.782581024	Zfp108	ENSMUSG00000030486	54678	zinc finger protein 108
ENSMUSG00000042228.14	chr4	3678115	3813122	+	Lyn	0.836732385	2.79E-06	2.77E-05	3709	3289	3324	6122	7500	6159	5.991605806	5.988495046	6.038823687	6.806532262	7.045711862	6.676733488	Lyn	ENSMUSG00000042228	17096	LYN proto-oncogene, Src family tyrosine kinase
ENSMUSG00000029135.10	chr5	32135801	32157842	+	Fosl2	0.59790673	2.80E-06	2.77E-05	4930	4135	4303	6918	6721	8008	6.402115022	6.318688502	6.411196778	6.982870674	6.887508318	7.055452294	Fosl2	ENSMUSG00000029135	14284	fos-like antigen 2
ENSMUSG00000017288.15	chr11	76046226	76179647	-	Vps53	0.579062828	2.82E-06	2.78E-05	1837	1571	1550	2473	2737	2701	4.978125315	4.922769006	4.938419835	5.498965293	5.591584055	5.487680926	Vps53	ENSMUSG00000017288	68299	VPS53 GARP complex subunit
ENSMUSG00000019832.3	chr10	10545011	10558233	-	Rab32	0.608750498	2.82E-06	2.78E-05	1645	1629	1513	2421	2609	2779	4.818907092	4.975056086	4.903574984	5.468312396	5.522498492	5.528745626	Rab32	ENSMUSG00000019832	67844	RAB32, member RAS oncogene family
ENSMUSG00000018909.15	chr7	99535466	99606771	+	Arrb1	0.510574163	2.83E-06	2.80E-05	5222	4892	4562	7190	7270	7890	6.485121653	6.561198584	6.495510868	7.038503487	7.000779674	7.034036967	Arrb1	ENSMUSG00000018909	109689	arrestin, beta 1
ENSMUSG00000040710.10	chr1	95587682	95667571	-	St8sia4	-0.839627551	2.84E-06	2.80E-05	2587	2309	2427	1273	1664	1459	5.471939928	5.47820728	5.585157605	4.541210353	4.873813961	4.599394455	St8sia4	ENSMUSG00000040710	20452	ST8 alpha-N-acetyl-neuraminide alpha-2,8-sialyltransferase 4
ENSMUSG00000041328.16	chr7	92643543	92669934	-	Pcf11	-0.526500258	2.83E-06	2.80E-05	6704	5521	5684	4235	4355	4672	6.84551081	6.735686984	6.812719766	6.274943683	6.261563436	6.278114908	Pcf11	ENSMUSG00000041328	74737	PCF11 cleavage and polyadenylation factor subunit
ENSMUSG00000040331.16	chr7	130532526	130573118	-	Nsmce4a	-0.784359138	2.84E-06	2.80E-05	2276	2112	2144	1278	1499	1289	5.287198525	5.349578075	5.406327625	4.546863554	4.723206613	4.420732017	Nsmce4a	ENSMUSG00000040331	67872	NSE4 homolog A, SMC5-SMC6 complex component
ENSMUSG00000097402.1	chr9	118150231	118170376	+	Gm17399	2.47844286	2.85E-06	2.81E-05	25	15	12	109	97	101	-1.192977877	-1.740961241	-2.016241786	1.001414168	0.780271119	0.753471876	Gm17399	ENSMUSG00000097402	100502695	predicted gene, 17399
ENSMUSG00000069303.5	chr13	21833743	21837530	+	Hist1h2br	-2.593987693	2.86E-06	2.81E-05	95	119	95	14	23	17	0.712025609	1.205709257	0.917330852	-1.915391896	-1.272470343	-1.782581024	Hist1h2br	ENSMUSG00000069303	665622	histone cluster 1 H2br
ENSMUSG00000032575.16	chr9	106838312	106891979	-	Manf	0.640647407	2.86E-06	2.82E-05	3201	2861	2720	4495	4586	5604	5.779129075	5.78739834	5.749558137	6.360892978	6.33611873	6.540505914	Manf	ENSMUSG00000032575	74840	mesencephalic astrocyte-derived neurotrophic factor
ENSMUSG00000021375.9	chr13	46749087	46929718	-	Kif13a	-2.884817332	2.87E-06	2.83E-05	48	52	54	7	6	8	-0.265490377	0.019087967	0.108086349	-2.866482296	-3.126619476	-2.8244012	Kif13a	ENSMUSG00000021375	16553	kinesin family member 13A
ENSMUSG00000021176.5	chr12	99717531	99883442	-	Efcab11	-2.033792523	2.88E-06	2.83E-05	140	131	137	25	36	47	1.269023101	1.343761438	1.443189833	-1.100947549	-0.637234635	-0.342008433	Egfem1	ENSMUSG00000063600	75740	EGF-like and EMI domain containing 1
ENSMUSG00000032388.6	chr9	65460937	65488470	+	Spg21	0.615027104	2.90E-06	2.85E-05	4828	4459	4171	6813	6921	8374	6.371956143	6.427508698	6.366252554	6.960807474	6.929809817	7.119923301	Spg21	ENSMUSG00000032388	27965	SPG21, maspardin
ENSMUSG00000024610.14	chr18	60803848	60812646	+	Cd74	-0.930894833	2.91E-06	2.85E-05	30181	26715	27162	15273	13240	19133	9.015973669	9.010231847	9.069230673	8.125370189	7.865610789	8.311949142	Cd74	ENSMUSG00000024610	16149	CD74 antigen (invariant polypeptide of major histocompatibility complex, class II antigen-associated)
ENSMUSG00000086844.1	chr7	141359141	141365110	-	B230206H07Rik	2.456306959	2.91E-06	2.85E-05	24	24	38	190	148	162	-1.250693375	-1.080447707	-0.393311435	1.800274296	1.387259926	1.432431867	B230206H07Rik	ENSMUSG00000086844	320871	RIKEN cDNA B230206H07 gene
ENSMUSG00000034902.17	chr10	81292963	81319973	+	Pip5k1c	0.883499114	2.94E-06	2.88E-05	6142	5471	5256	10633	9484	13463	6.719207018	6.722563133	6.699788821	7.602956024	7.384296811	7.804901843	Pip5k1c	ENSMUSG00000034902	18717	phosphatidylinositol-4-phosphate 5-kinase, type 1 gamma
ENSMUSG00000004698.10	chr12	34047580	34917095	-	Hdac9	-2.247668683	2.95E-06	2.89E-05	394	300	350	63	55	131	2.758478271	2.53606363	2.793172658	0.215311795	-0.032643328	1.127054948	Hdac9	ENSMUSG00000004698	79221	histone deacetylase 9
ENSMUSG00000015711.8	chr3	95253674	95282076	-	Prune	0.931650425	2.96E-06	2.89E-05	1285	1105	1117	2251	2071	2886	4.462710676	4.415325759	4.46596114	5.363297871	5.189400911	5.583241469	Prune1	ENSMUSG00000015711	229589	prune exopolyphosphatase
ENSMUSG00000025077.13	chr19	56529167	56548222	-	Dclre1a	-0.709895937	2.98E-06	2.91E-05	989	868	904	588	571	645	4.085152678	4.067224488	4.160878717	3.427525714	3.331550494	3.422409244	Dclre1a	ENSMUSG00000025077	55947	DNA cross-link repair 1A
ENSMUSG00000007379.15	chr3	103102604	103169769	+	Dennd2c	-0.780202681	3.00E-06	2.93E-05	2188	2008	2054	1233	1435	1233	5.230323449	5.276745195	5.344473639	4.495169109	4.660278421	4.356677959	Dennd2c	ENSMUSG00000007379	329727	DENN/MADD domain containing 2C
ENSMUSG00000024481.4	chr18	46850039	46905446	+	Lvrn	-3.020139024	3.04E-06	2.97E-05	40	42	41	4	5	6	-0.525553216	-0.285766615	-0.285058544	-3.60344789	-3.367627576	-3.211424323	Lvrn	ENSMUSG00000024481	74574	laeverin
ENSMUSG00000028755.3	chr4	138338424	138367992	-	Cda	3.18551607	3.06E-06	2.98E-05	14	12	11	138	145	97	-2.007422224	-2.051301361	-2.13653602	1.340369275	1.357816149	0.695466273	Cda	ENSMUSG00000028755	72269	cytidine deaminase
ENSMUSG00000058216.12	chr19	4057477	4059446	-	BC021614	-2.046186087	3.06E-06	2.98E-05	130	104	90	25	24	34	1.162502777	1.012201581	0.839747911	-1.100947549	-1.21234935	-0.803339584	NA	NA	NA	NA
ENSMUSG00000024867.14	chr19	24294794	24555872	-	Pip5k1b	0.758696478	3.06E-06	2.98E-05	708	613	627	1034	1239	1258	3.603220824	3.565761983	3.633373673	4.241345038	4.448483362	4.38562546	Pip5k1b	ENSMUSG00000024867	18719	phosphatidylinositol-4-phosphate 5-kinase, type 1 beta
ENSMUSG00000043953.12	chr9	111054486	111057519	-	Ccrl2	-2.512977155	3.06E-06	2.98E-05	101	98	75	21	17	13	0.799932698	0.926894268	0.578306764	-1.347108137	-1.697776177	-2.156976539	Ccrl2	ENSMUSG00000043953	54199	chemokine (C-C motif) receptor-like 2
ENSMUSG00000032044.4	chr9	35267865	35277731	+	Rpusd4	0.758444226	3.07E-06	2.98E-05	1551	1393	1334	2547	2773	2424	4.734044762	4.749339736	4.721985614	5.54149354	5.610432816	5.331607498	Rpusd4	ENSMUSG00000032044	71989	RNA pseudouridylate synthase domain containing 4
ENSMUSG00000009394.13	chr6	115134902	115282006	+	Syn2	3.122069609	3.08E-06	2.99E-05	6	4	5	51	42	59	-3.164963501	-3.52523255	-3.200666357	-0.086872364	-0.417668258	-0.017046278	Syn2	ENSMUSG00000009394	20965	synapsin II
ENSMUSG00000088948.1	chr7	111076060	111076227	-	Gm23262	-0.911204161	3.08E-06	2.99E-05	707	654	635	395	389	353	3.601183118	3.659091831	3.651650339	2.854160993	2.778420324	2.553702364	NA	NA	NA	NA
ENSMUSG00000048126.16	chr1	90765923	90843971	-	Col6a3	-3.584037153	3.08E-06	3.00E-05	66	69	99	6	6	7	0.189879216	0.423783522	0.976526645	-3.072933173	-3.126619476	-3.004973445	Col6a3	ENSMUSG00000048126	12835	collagen, type VI, alpha 3
ENSMUSG00000071203.6	chr13	100211739	100246323	-	Naip5	-0.760321392	3.09E-06	3.00E-05	1298	1034	1112	644	730	798	4.477227079	4.319560379	4.459491645	3.558663657	3.685681268	3.729284557	Naip5	ENSMUSG00000071203	17951	NLR family, apoptosis inhibitory protein 5
ENSMUSG00000090174.1	chr8	122697860	122700160	+	Gm10612	-3.515738445	3.12E-06	3.03E-05	63	64	80	5	4	10	0.123281467	0.316069704	0.670818902	-3.313941273	-3.657134193	-2.519546618	Gm10612	NA	102638502	predicted gene 10612
ENSMUSG00000001774.7	chr9	18292267	18314000	+	Chordc1	0.7475357	3.13E-06	3.04E-05	5782	4645	4949	8112	10188	9320	6.632074426	6.486460617	6.6129691	7.212557966	7.487594852	7.274327594	Chordc1	ENSMUSG00000001774	66917	cysteine and histidine-rich domain (CHORD)-containing, zinc-binding protein 1
ENSMUSG00000003573.15	chr8	70282827	70294361	+	Homer3	-0.614518388	3.14E-06	3.04E-05	3104	2935	2924	2043	2150	2068	5.734741997	5.82423299	5.853876298	5.223453637	5.243397222	5.102505201	Homer3	ENSMUSG00000003573	26558	homer scaffolding protein 3
ENSMUSG00000006356.10	chr12	113140236	113145506	+	Crip2	1.302004198	3.14E-06	3.04E-05	176	112	153	361	379	410	1.598121154	1.11862364	1.60199687	2.724478946	2.740896881	2.769374371	Crip2	ENSMUSG00000006356	68337	cysteine rich protein 2
ENSMUSG00000105986.1	chr3	103864706	103866797	+	Gm43065	1.567966361	3.14E-06	3.04E-05	88	94	113	334	294	302	0.602202331	0.867084873	1.166450512	2.612489509	2.375064629	2.328927291	NA	NA	NA	NA
ENSMUSG00000037318.10	chr1	193175453	193201703	-	Traf3ip3	-0.620423673	3.16E-06	3.06E-05	2948	2535	2691	1699	1949	2042	5.66036226	5.612897008	5.734096734	4.957521755	5.101829245	5.084256322	Traf3ip3	ENSMUSG00000037318	215243	TRAF3 interacting protein 3
ENSMUSG00000028459.11	chr4	43446462	43454628	-	Cd72	0.540430815	3.18E-06	3.08E-05	8413	8152	7415	12076	12447	12741	7.173087149	7.29786927	7.196230281	7.786541883	7.776509201	7.725383468	Cd72	ENSMUSG00000028459	12517	CD72 antigen
ENSMUSG00000021182.14	chr12	100912700	101028983	-	Ccdc88c	-1.011457407	3.27E-06	3.16E-05	793	718	637	397	404	341	3.766683194	3.793686795	3.656183556	2.861438159	2.832936698	2.503877727	Ccdc88c	ENSMUSG00000021182	68339	coiled-coil domain containing 88C
ENSMUSG00000032252.14	chr9	62057248	62122655	-	Glce	0.544419719	3.27E-06	3.16E-05	1701	1561	1497	2313	2450	2661	4.867188217	4.913559303	4.888242312	5.402488492	5.431801237	5.46615981	Glce	ENSMUSG00000032252	93683	glucuronyl C5-epimerase
ENSMUSG00000093769.3	chr3	96246685	96248504	+	Hist2h3c1	-1.852211909	3.27E-06	3.16E-05	147	159	150	45	52	38	1.339167925	1.622255063	1.573521701	-0.265578251	-0.112813677	-0.6450775	Hist2h3c1	ENSMUSG00000093769	15077	histone cluster 2, H3c1
ENSMUSG00000036225.14	chr18	14968685	15151446	-	Kctd1	6.466998327	3.29E-06	3.17E-05	0	6	2	180	149	252	-6.865403219	-2.994717833	-4.338169881	1.722482135	1.39694248	2.068275537	Kctd1	ENSMUSG00000036225	106931	potassium channel tetramerisation domain containing 1
ENSMUSG00000027884.16	chr3	108653913	108678840	+	Clcc1	-0.549447254	3.29E-06	3.17E-05	4874	4397	4272	3010	3458	3433	6.385635308	6.407310311	6.400766801	5.782414511	5.928871547	5.833600207	Clcc1	ENSMUSG00000027884	229725	chloride channel CLIC-like 1
ENSMUSG00000001761.7	chr6	29735503	29761365	+	Smo	-3.639880797	3.30E-06	3.17E-05	48	57	51	2	5	6	-0.265490377	0.1503325	0.026402551	-4.451444797	-3.367627576	-3.211424323	Smo	ENSMUSG00000001761	319757	smoothened, frizzled class receptor
ENSMUSG00000025366.7	chr10	128510248	128525859	-	Esyt1	-0.817412728	3.30E-06	3.17E-05	4469	4107	3819	2529	2734	2273	6.260494512	6.308887309	6.2390701	5.531263632	5.590002152	5.238835248	Esyt1	ENSMUSG00000025366	23943	extended synaptotagmin-like protein 1
ENSMUSG00000030203.17	chr6	134715468	134792625	-	Dusp16	-0.656206378	3.30E-06	3.17E-05	1271	1170	1196	760	832	876	4.446912527	4.497751668	4.564506706	3.797431546	3.874247268	3.86374624	Dusp16	ENSMUSG00000030203	70686	dual specificity phosphatase 16
ENSMUSG00000040913.10	chr19	45578254	45660312	-	Fbxw4	-0.724623064	3.30E-06	3.17E-05	956	905	869	575	607	584	4.036217939	4.12741328	4.103944242	3.395299227	3.419681404	3.279195174	Fbxw4	ENSMUSG00000040913	30838	F-box and WD-40 domain protein 4
ENSMUSG00000032350.8	chr9	77754535	77794485	+	Gclc	0.637798339	3.32E-06	3.19E-05	5351	4597	4557	7326	7588	9300	6.520324394	6.471476308	6.493928965	7.065535555	7.06253983	7.271228522	Gclc	ENSMUSG00000032350	14629	glutamate-cysteine ligase, catalytic subunit
ENSMUSG00000026245.16	chr1	78417975	78488897	-	Farsb	0.553619185	3.32E-06	3.19E-05	4183	3422	3402	5304	5890	6039	6.1650915	6.045677275	6.072281471	6.599628163	6.697115189	6.64834936	Farsb	ENSMUSG00000026245	23874	phenylalanyl-tRNA synthetase, beta subunit
ENSMUSG00000047090.13	chr10	128800036	128804370	-	Tmem198b	0.822075875	3.34E-06	3.20E-05	399	413	366	729	717	778	2.776648474	2.996585968	2.857571412	3.737391277	3.659775827	3.692689188	Tmem198b	ENSMUSG00000047090	73827	transmembrane protein 198b
ENSMUSG00000002486.15	chr5	114707760	114722327	+	Tchp	-0.8568053	3.35E-06	3.21E-05	710	591	580	336	401	373	3.60728762	3.513076807	3.521054281	2.621089803	2.822196983	2.633100392	Tchp	ENSMUSG00000002486	77832	trichoplein, keratin filament binding
ENSMUSG00000077714.1	chr2	144265979	144266216	-	Snord17	-1.131302349	3.35E-06	3.21E-05	2605	2267	1845	1008	1290	982	5.48194132	5.451729284	5.189698047	4.204622477	4.506655232	4.028449556	Snord17	ENSMUSG00000077714	100313519	small nucleolar RNA, C/D box 17
ENSMUSG00000030717.9	chr7	126623249	126630861	-	Nupr1	-0.865987575	3.37E-06	3.23E-05	2122	1842	1799	1011	1010	1385	5.186145619	5.152291353	5.153282411	4.208907713	4.153794412	4.524326955	Nupr1	ENSMUSG00000030717	56312	nuclear protein transcription regulator 1
ENSMUSG00000007594.10	chr8	70083457	70090862	+	Hapln4	-3.315737894	3.39E-06	3.24E-05	65	69	70	8	10	4	0.168019782	0.423783522	0.479453377	-2.68591005	-2.434741772	-3.741939039	Hapln4	ENSMUSG00000007594	330790	hyaluronan and proteoglycan link protein 4
ENSMUSG00000043683.3	chr17	56256793	56263608	+	Fem1a	0.525505087	3.42E-06	3.27E-05	3210	3006	2717	4425	4547	4758	5.783179064	5.858711692	5.747966344	6.338251856	6.323798728	6.304427115	Fem1a	ENSMUSG00000043683	14154	feminization 1 homolog a (C. elegans)
[truncated: 13,730 more rows]
