# Supplementary material for: The transcription factors TFE3 and TFEB amplify p53 dependent transcriptional programs in response to DNA damage
Source: eLife journal article supplement (doi:10.7554/elife.40856), 2018-12-06
Supplement: supp [file elife-40856-supp-v1.zip › elife_poa_e40856_Supplementary_File_3.xlsx]

## Sheet: Sheet1
Supplementary Table 3	chr	start	end	strand	genesymbol	log2FC	pval	qval	RAW WT etoposide	RAW WT etoposide	RAW WT etoposide	RAW TFEB/TFE3 DKO etoposide	RAW TFEB/TFE3 DKO etoposide	RAW TFEB/TFE3 DKO etoposide	RAW WT etoposide normalized	RAW WT etoposide normalized	RAW WT etoposide normalized	RAW TFEB/TFE3 DKO etoposide normalized	RAW TFEB/TFE3 DKO etoposide normalized	RAW TFEB/TFE3 DKO etoposide normalized	symbol	ensmbl	entrez	name
ENSMUSG00000044783.16	chr1	88262471	88277633	-	Hjurp	-2.40798	1.21e-12	2.06e-09	11214	9880	9552	2004	2027	2133	7.58767	7.57521	7.56156	5.19565	5.15843	5.14714	Hjurp	ENSMUSG00000044783	381280	Holliday junction recognition protein
ENSMUSG00000031004.8	chr7	135689784	135716361	-	Mki67	-3.22637	2.11e-13	2.06e-09	44891	36617	37643	4211	4384	5000	9.58875	9.46509	9.54002	6.26675	6.27114	6.37599	Mki67	ENSMUSG00000031004	17345	antigen identified by monoclonal antibody Ki 67
ENSMUSG00000036768.5	chr9	122951081	123018725	+	Kif15	-2.94385	1.21e-12	2.06e-09	4829	4124	3999	563	599	633	6.37225	6.31485	6.30551	3.3649	3.40056	3.39534	Kif15	ENSMUSG00000036768	209737	kinesin family member 15
ENSMUSG00000028678.13	chr4	117159639	117182639	-	Kif2c	-3.83782	1.14e-12	2.06e-09	3828	3298	3082	240	257	263	6.03716	5.99244	5.92979	2.13652	2.18137	2.1298	Kif2c	ENSMUSG00000028678	73804	kinesin family member 2C
ENSMUSG00000041431.16	chr13	100778650	100786570	-	Ccnb1	-3.35183	1.43e-12	2.09e-09	3934	3511	3322	348	397	381	6.07656	6.08271	6.03796	2.67164	2.80775	2.66368	Ccnb1	ENSMUSG00000041431	268697	cyclin B1
ENSMUSG00000026683.14	chr1	169497934	169531464	-	Nuf2	-4.07911	1.55e-12	2.09e-09	3121	2633	2568	164	179	181	5.74262	5.66761	5.66661	1.58857	1.66078	1.59196	Nuf2	ENSMUSG00000026683	66977	NUF2, NDC80 kinetochore complex component
ENSMUSG00000038943.16	chr7	80294450	80316259	+	Prc1	-2.97893	1.77e-12	2.09e-09	6525	5523	5088	749	762	802	6.80647	6.73621	6.65293	3.77641	3.74753	3.73649	Prc1	ENSMUSG00000038943	233406	protein regulator of cytokinesis 1
ENSMUSG00000002055.9	chr11	78301529	78322457	+	Spag5	-2.70609	1.91e-12	2.09e-09	4564	4155	4034	686	674	728	6.29084	6.32565	6.31808	3.64974	3.57062	3.59692	Spag5	ENSMUSG00000002055	54141	sperm associated antigen 5
ENSMUSG00000024989.14	chr19	38055025	38074425	+	Cep55	-3.76577	2.52e-12	2.11e-09	3509	2986	2993	227	230	289	5.91165	5.84908	5.88752	2.05635	2.02156	2.26556	Cep55	ENSMUSG00000024989	74107	centrosomal protein 55
ENSMUSG00000026622.15	chr1	191821444	191833050	+	Nek2	-3.88071	2.61e-12	2.11e-09	2994	2755	2559	206	202	194	5.6827	5.73294	5.66155	1.91663	1.83472	1.69176	Nek2	ENSMUSG00000026622	18005	NIMA (never in mitosis gene a)-related expressed kinase 2
ENSMUSG00000020914.17	chr11	98992943	99024189	-	Top2a	-2.46555	2.61e-12	2.11e-09	28244	23744	23149	4370	4870	5295	8.92028	8.84015	8.8386	6.32021	6.42279	6.45869	Top2a	ENSMUSG00000020914	21973	topoisomerase (DNA) II alpha
ENSMUSG00000020330.16	chr11	40701395	40733422	-	Hmmr	-4.38203	3.01e-12	2.31e-09	4731	3785	3873	225	214	195	6.34268	6.19111	6.25932	2.04361	1.91777	1.69916	Hmmr	ENSMUSG00000020330	15366	hyaluronan mediated motility receptor (RHAMM)
ENSMUSG00000033952.14	chr1	139454772	139494091	+	Aspm	-4.30392	3.22e-12	2.34e-09	4677	3873	3929	208	195	275	6.32612	6.22426	6.28003	1.93053	1.78397	2.19404	Aspm	ENSMUSG00000033952	12316	abnormal spindle microtubule assembly
ENSMUSG00000027306.15	chr2	119618298	119651244	+	Nusap1	-3.9101	3.35e-12	2.34e-09	4984	4008	3970	265	297	359	6.41783	6.27369	6.29501	2.2792	2.38969	2.57798	Nusap1	ENSMUSG00000027306	108907	nucleolar and spindle associated protein 1
ENSMUSG00000027326.13	chr2	119047119	119105501	+	Casc5	-3.34465	4.24e-12	2.41e-09	4914	4051	4055	390	458	523	6.39743	6.28908	6.32557	2.83581	3.01372	3.12018	Knl1	ENSMUSG00000027326	76464	kinetochore scaffold 1
ENSMUSG00000026605.14	chr1	189640606	189688086	-	Cenpf	-4.59028	4.31e-12	2.41e-09	4840	3728	3955	181	162	211	6.37554	6.16922	6.28955	1.73045	1.51724	1.81265	Cenpf	ENSMUSG00000026605	108000	centromere protein F
ENSMUSG00000017716.15	chr11	117849251	117855743	+	Birc5	-3.80636	3.96e-12	2.41e-09	2682	2482	2355	176	177	222	5.52396	5.58242	5.54172	1.69015	1.64462	1.8858	Birc5	ENSMUSG00000017716	11799	baculoviral IAP repeat-containing 5
ENSMUSG00000045328.11	chr3	135212537	135273611	+	Cenpe	-3.17388	5.7e-12	2.86e-09	9401	6967	7492	902	965	939	7.33327	7.07127	7.21113	4.04441	4.08807	3.96389	Cenpe	ENSMUSG00000045328	229841	centromere protein E
ENSMUSG00000015880.13	chr5	45669919	45700546	+	Ncapg	-2.96044	5.82e-12	2.86e-09	4098	3432	3419	468	541	493	6.13548	6.04989	6.07947	3.09853	3.25376	3.03504	Ncapg	ENSMUSG00000015880	54392	non-SMC condensin I complex, subunit G
ENSMUSG00000032218.6	chr9	70407689	70421554	-	Ccnb2	-4.15597	7.33e-12	3.4e-09	3696	3212	3233	225	166	221	5.98654	5.95432	5.99878	2.04361	1.55232	1.8793	Ccnb2	ENSMUSG00000032218	12442	cyclin B2
ENSMUSG00000022034.9	chr14	65819038	65833994	-	Esco2	-3.83621	7.6e-12	3.4e-09	2484	2177	2024	155	151	194	5.41334	5.3933	5.32325	1.5074	1.41611	1.69176	Esco2	ENSMUSG00000022034	71988	establishment of sister chromatid cohesion N-acetyltransferase 2
ENSMUSG00000027715.9	chr3	36564865	36572150	-	Ccna2	-3.04367	8.92e-12	3.47e-09	12506	10918	10505	1322	1327	1776	7.74499	7.71933	7.69876	4.59568	4.54744	4.88296	Ccna2	ENSMUSG00000027715	12428	cyclin A2
ENSMUSG00000023015.13	chr15	99620496	99651656	-	Racgap1	-2.5614	9.01e-12	3.47e-09	3851	3688	3473	667	660	667	6.0458	6.15366	6.10208	3.60925	3.54036	3.47076	Racgap1	ENSMUSG00000023015	26934	Rac GTPase-activating protein 1
ENSMUSG00000058290.3	chr15	102296293	102324356	+	Espl1	-3.46792	9.04e-12	3.47e-09	2789	2733	2460	259	233	279	5.58039	5.72138	5.60464	2.24622	2.04022	2.21484	Espl1	ENSMUSG00000058290	105988	extra spindle pole bodies 1, separase
ENSMUSG00000020897.12	chr11	69045647	69051664	+	Aurkb	-2.95589	1.04e-11	3.62e-09	3076	2848	2781	377	436	388	5.72167	5.78083	5.78155	2.78696	2.94278	2.68991	Aurkb	ENSMUSG00000020897	20877	aurora kinase B
ENSMUSG00000030867.7	chr7	122159439	122169873	+	Plk1	-4.01304	1.04e-11	3.62e-09	2635	2506	2157	150	149	183	5.49846	5.5963	5.41505	1.46025	1.39694	1.60777	Plk1	ENSMUSG00000030867	18817	polo like kinase 1
ENSMUSG00000038379.15	chr9	83834689	83872389	+	Ttk	-3.94385	1.46e-11	4.56e-09	1723	1557	1464	96	121	112	4.88572	4.90986	4.85609	0.819084	1.09775	0.901917	Ttk	ENSMUSG00000038379	22137	Ttk protein kinase
ENSMUSG00000006398.15	chr4	118432901	118437352	-	Cdc20	-2.92347	1.51e-11	4.62e-09	5098	4909	4532	714	704	635	6.45045	6.5662	6.48599	3.70742	3.6334	3.39988	Cdc20	ENSMUSG00000006398	107995	cell division cycle 20
ENSMUSG00000048922.18	chr14	67676331	67715841	-	Cdca2	-2.22478	1.99e-11	5.27e-09	4305	4031	3676	837	902	1009	6.20656	6.28194	6.18402	3.93657	3.99072	4.06756	Cdca2	ENSMUSG00000048922	108912	cell division cycle associated 2
ENSMUSG00000027699.19	chr3	27097222	27153878	-	Ect2	-2.63296	2.09e-11	5.28e-09	2472	2131	2152	394	390	379	5.40635	5.3625	5.4117	2.85051	2.78212	2.65609	Ect2	ENSMUSG00000027699	13605	ect2 oncogene
ENSMUSG00000032254.9	chr9	61917280	61946799	-	Kif23	-1.94375	2.1e-11	5.28e-09	5446	4762	4583	1327	1388	1388	6.54571	6.52235	6.50214	4.60112	4.61225	4.52745	Kif23	ENSMUSG00000032254	71819	kinesin family member 23
ENSMUSG00000032254.9	chr9	61917280	61946799	-	Kif23	-1.94375	2.1e-11	5.28e-09	5446	4762	4583	1327	1388	1388	6.54571	6.52235	6.50214	4.60112	4.61225	4.52745	Kif23	ENSMUSG00000032254	71819	kinesin family member 23
ENSMUSG00000030641.10	chr7	92857525	92874247	-	Ddias	-2.20492	2.32e-11	5.5e-09	5731	4806	4846	1187	1093	1284	6.61929	6.53561	6.58263	4.44034	4.26768	4.41513	Ddias	ENSMUSG00000030641	74041	DNA damage-induced apoptosis suppressor
ENSMUSG00000012443.3	chr19	37376403	37421859	+	Kif11	-3.93068	2.29e-11	5.5e-09	4649	3850	3729	286	335	242	6.31746	6.21567	6.20467	2.38902	2.56311	2.00998	Kif11	ENSMUSG00000012443	16551	kinesin family member 11
ENSMUSG00000030641.10	chr7	92857525	92874247	-	Ddias	-2.20492	2.32e-11	5.5e-09	5731	4806	4846	1187	1093	1284	6.61929	6.53561	6.58263	4.44034	4.26768	4.41513	Ddias	ENSMUSG00000030641	74041	DNA damage-induced apoptosis suppressor
ENSMUSG00000037725.8	chr8	22168160	22185819	-	Ckap2	-2.14231	2.45e-11	5.53e-09	3076	2622	2668	631	683	709	5.72167	5.66157	5.72172	3.52927	3.58974	3.55879	Ckap2	ENSMUSG00000037725	80986	cytoskeleton associated protein 2
ENSMUSG00000020493.8	chr11	87089153	87108708	-	Prr11	-3.54906	2.62e-11	5.67e-09	1699	1473	1497	124	134	169	4.86549	4.82987	4.88824	1.18663	1.2444	1.49328	Prr11	ENSMUSG00000020493	270906	proline rich 11
ENSMUSG00000019942.12	chr10	69336635	69352938	-	Cdk1	-2.09291	2.79e-11	5.89e-09	4172	3803	3421	899	927	1025	6.16129	6.19795	6.08032	4.03961	4.03014	4.09025	Cdk1	ENSMUSG00000019942	12534	cyclin-dependent kinase 1
ENSMUSG00000037544.13	chr14	47387779	47418407	-	Dlgap5	-2.25139	3.66e-11	7.02e-09	4015	3565	3345	734	788	934	6.10596	6.10473	6.04791	3.74725	3.79591	3.95619	Dlgap5	ENSMUSG00000037544	218977	DLG associated protein 5
ENSMUSG00000017146.12	chr11	101488764	101551955	-	Brca1	-1.85373	3.81e-11	7.12e-09	4189	3683	3632	1046	1135	1221	6.16716	6.1517	6.16665	4.25798	4.32205	4.34257	Brca1	ENSMUSG00000017146	12189	breast cancer 1, early onset
ENSMUSG00000030677.8	chr7	127027729	127042471	-	Kif22	-2.63153	3.87e-11	7.16e-09	1865	1735	1586	297	299	297	4.99994	5.06598	4.97153	2.44337	2.39935	2.30488	Kif22	ENSMUSG00000030677	110033	kinesin family member 22
ENSMUSG00000048327.6	chr2	129268210	129297212	-	Ckap2l	-3.47721	4.22e-11	7.53e-09	4391	3935	3875	385	312	489	6.23509	6.24717	6.26007	2.81721	2.46065	3.0233	Ckap2l	ENSMUSG00000048327	70466	cytoskeleton associated protein 2-like
ENSMUSG00000024795.10	chr19	34922358	34975731	+	Kif20b	-2.44213	4.41e-11	7.69e-09	4564	3798	3707	682	785	910	6.29084	6.19606	6.19613	3.64131	3.79041	3.91865	Kif20b	ENSMUSG00000024795	240641	kinesin family member 20B
ENSMUSG00000032783.8	chr15	99074973	99083407	+	Troap	-3.87832	4.53e-11	7.8e-09	1763	1757	1475	115	123	123	4.91882	5.08415	4.86689	1.07838	1.12131	1.0365	Troap	ENSMUSG00000032783	78733	trophinin associated protein
ENSMUSG00000030528.12	chr7	80454733	80535119	-	Blm	-2.1948	5.22e-11	8.51e-09	3139	2632	2473	587	649	683	5.75092	5.66706	5.61224	3.42507	3.51613	3.50493	Blm	ENSMUSG00000030528	12144	Bloom syndrome, RecQ like helicase
ENSMUSG00000007080.14	chr5	110286306	110337474	+	Pole	-1.67329	5.4e-11	8.62e-09	6650	5922	5960	2006	1997	2209	6.83384	6.83683	6.88112	5.19709	5.13692	5.19764	Pole	ENSMUSG00000007080	18973	polymerase (DNA directed), epsilon
ENSMUSG00000027331.15	chr2	118814003	118853957	+	Knstrn	-2.17323	5.72e-11	8.86e-09	2657	2461	2340	529	623	617	5.51045	5.57016	5.5325	3.27511	3.45719	3.35843	Knstrn	ENSMUSG00000027331	51944	kinetochore-localized astrin/SPAG5 binding
ENSMUSG00000025758.10	chr3	40800019	40816883	+	Plk4	-2.4979	5.82e-11	8.93e-09	2886	2434	2302	482	430	529	5.6297	5.55425	5.50889	3.14101	2.92281	3.13662	Plk4	ENSMUSG00000025758	20873	polo like kinase 4
ENSMUSG00000029177.9	chr5	30666777	30674830	+	Cenpa	-2.19429	6.47e-11	9.62e-09	2658	2282	2275	582	534	568	5.51099	5.46124	5.49187	3.41274	3.23499	3.23915	Cenpa	ENSMUSG00000029177	12615	centromere protein A
ENSMUSG00000005410.6	chr8	75109569	75128439	+	Mcm5	-1.68834	7.33e-11	1.05e-08	16382	16070	15052	4989	5162	5625	8.13446	8.27697	8.21762	6.51131	6.50679	6.5459	Mcm5	ENSMUSG00000005410	17218	minichromosome maintenance complex component 5
ENSMUSG00000024056.9	chr17	71496100	71526857	-	Ndc80	-3.63388	8.14e-11	1.12e-08	1590	1380	1246	99	123	141	4.76986	4.73582	4.62357	0.863252	1.12131	1.23279	Ndc80	ENSMUSG00000024056	67052	NDC80 kinetochore complex component
ENSMUSG00000034206.15	chr16	37011786	37095417	+	Polq	-2.92008	8.09e-11	1.12e-08	1588	1283	1348	192	209	193	4.76805	4.63071	4.73704	1.81534	1.88375	1.68433	Polq	ENSMUSG00000034206	77782	polymerase (DNA directed), theta
ENSMUSG00000020415.16	chr11	43420250	43426251	-	Pttg1	-2.21428	8.23e-11	1.13e-08	2304	2070	2086	509	458	522	5.30483	5.32061	5.36677	3.21957	3.01372	3.11742	Pttg1	ENSMUSG00000020415	30939	pituitary tumor-transforming gene 1
ENSMUSG00000041498.13	chr1	136466343	136531511	+	Kif14	-3.95386	9.24e-11	1.2e-08	1616	1278	1285	80	92	116	4.79325	4.62508	4.66802	0.557544	0.704322	0.952322	Kif14	ENSMUSG00000041498	381293	kinesin family member 14
ENSMUSG00000042029.6	chr12	116405402	116463531	+	Ncapg2	-1.89098	9.86e-11	1.26e-08	4340	3664	3492	993	1109	1207	6.21824	6.14424	6.10995	4.183	4.28863	4.32594	Ncapg2	ENSMUSG00000042029	76044	non-SMC condensin II complex, subunit G2
ENSMUSG00000027379.13	chr2	127801122	127831865	-	Bub1	-2.81752	1.15e-10	1.38e-08	4560	3603	3714	543	701	561	6.28957	6.12003	6.19885	3.31276	3.62724	3.22128	Bub1	ENSMUSG00000027379	12235	BUB1, mitotic checkpoint serine/threonine kinase
ENSMUSG00000031756.5	chr8	116921730	116941507	+	Cenpn	-2.66238	1.16e-10	1.39e-08	1333	1174	1241	191	220	221	4.5156	4.50267	4.61777	1.80783	1.95758	1.8793	Cenpn	ENSMUSG00000031756	72155	centromere protein N
ENSMUSG00000046591.10	chr7	79660196	79698148	+	Ticrr	-2.2917	1.22e-10	1.44e-08	2341	2070	1921	404	450	530	5.32781	5.32061	5.24792	2.88662	2.98832	3.13934	Ticrr	ENSMUSG00000046591	77011	TOPBP1-interacting checkpoint and replication regulator
ENSMUSG00000037313.16	chr5	33658128	33678995	+	Tacc3	-1.61977	1.38e-10	1.55e-08	4452	4206	3979	1411	1481	1503	6.255	6.34325	6.29827	4.68964	4.70578	4.64225	Tacc3	ENSMUSG00000037313	21335	transforming, acidic coiled-coil containing protein 3
ENSMUSG00000034906.15	chr2	127103809	127133954	-	Ncaph	-2.25982	1.47e-10	1.65e-08	2997	2785	2587	558	699	616	5.68414	5.74856	5.67725	3.35204	3.62312	3.35609	Ncaph	ENSMUSG00000034906	215387	non-SMC condensin I complex, subunit H
ENSMUSG00000026779.6	chr2	23115606	23156024	-	Mastl	-2.91364	1.63e-10	1.77e-08	1410	1191	1175	148	179	210	4.59659	4.52341	4.53896	1.44095	1.66078	1.80581	Mastl	ENSMUSG00000026779	67121	microtubule associated serine/threonine kinase-like
ENSMUSG00000024660.8	chr19	9872297	9899533	-	Incenp	-1.65512	1.71e-10	1.84e-08	4487	4049	3884	1373	1311	1534	6.26629	6.28837	6.26342	4.65027	4.52994	4.67169	Incenp	ENSMUSG00000024660	16319	inner centromere protein
ENSMUSG00000026355.11	chr1	128331590	128359664	-	Mcm6	-1.47928	1.99e-10	2.08e-08	12682	11074	10223	4160	4194	4646	7.76515	7.7398	7.6595	6.24917	6.20722	6.27006	Mcm6	ENSMUSG00000026355	17219	minichromosome maintenance complex component 6
ENSMUSG00000023940.14	chr17	53674786	53689333	-	Sgol1	-2.63498	2.09e-10	2.15e-08	1089	997	1009	175	185	172	4.22405	4.26702	4.31933	1.68195	1.70822	1.51859	Sgo1	ENSMUSG00000023940	72415	shugoshin 1
ENSMUSG00000028718.16	chr4	115000159	115043196	+	Stil	-2.21268	2.11e-10	2.15e-08	1520	1334	1298	289	305	364	4.70493	4.68693	4.68253	2.40405	2.42797	2.59791	Stil	ENSMUSG00000028718	20460	Scl/Tal1 interrupting locus
ENSMUSG00000062248.5	chr13	51645232	51650660	+	Cks2	-2.0087	2.55e-10	2.56e-08	1876	1794	1784	476	457	516	5.00843	5.11421	5.14121	3.12296	3.01057	3.10076	Cks2	ENSMUSG00000062248	66197	CDC28 protein kinase regulatory subunit 2
ENSMUSG00000039396.11	chr8	53586867	53639065	-	Neil3	-4.10612	2.8e-10	2.75e-08	697	628	579	42	36	39	3.58065	3.60061	3.51857	-0.363982	-0.637235	-0.608083	Neil3	ENSMUSG00000039396	234258	nei like 3 (E. coli)
ENSMUSG00000032586.9	chr9	107950136	107972270	+	Traip	-3.16662	2.79e-10	2.75e-08	1165	1097	1058	137	145	115	4.32133	4.40485	4.38771	1.32991	1.35782	0.939885	Traip	ENSMUSG00000032586	22036	TRAF-interacting protein
ENSMUSG00000020808.3	chr11	72042032	72047370	+	Fam64a	-4.3981	2.98e-10	2.84e-08	1066	1057	940	40	63	53	4.19327	4.35128	4.21719	-0.433523	0.161625	-0.170397	Pimreg	ENSMUSG00000020808	109212	PICALM interacting mitotic regulator
ENSMUSG00000035683.13	chr4	44300876	44364675	+	Melk	-2.93624	2.94e-10	2.84e-08	1561	1537	1509	174	240	233	4.74331	4.89121	4.89976	1.67371	2.08283	1.95541	Melk	ENSMUSG00000035683	17279	maternal embryonic leucine zipper kinase
ENSMUSG00000017861.11	chr2	163054687	163084688	+	Mybl2	-1.89283	3.72e-10	3.38e-08	3667	3435	3071	988	876	1067	5.97518	6.05115	5.92463	4.17572	3.94855	4.14816	Mybl2	ENSMUSG00000017861	17865	myeloblastosis oncogene-like 2
ENSMUSG00000023505.13	chr6	124829547	124833701	+	Cdca3	-2.7659	4.11e-10	3.6e-08	2268	2362	2011	355	377	314	5.28212	5.51094	5.31396	2.70033	2.73327	2.38505	Cdca3	ENSMUSG00000023505	14793	cell division cycle associated 3
ENSMUSG00000047534.16	chr12	65132734	65172604	-	Mis18bp1	-1.61945	4.08e-10	3.6e-08	3271	2752	2648	935	1046	1029	5.81033	5.73137	5.71086	4.09622	4.2043	4.09586	Mis18bp1	ENSMUSG00000047534	217653	MIS18 binding protein 1
ENSMUSG00000035365.15	chr10	88091432	88146941	-	Parpbp	-2.72788	4.19e-10	3.64e-08	1017	955	866	143	170	145	4.12541	4.20495	4.09896	1.39153	1.58657	1.27301	Parpbp	ENSMUSG00000035365	75317	PARP1 binding protein
ENSMUSG00000005233.16	chr2	69193895	69206194	-	Spc25	-2.74218	4.31e-10	3.68e-08	1945	1771	1774	305	328	251	5.06052	5.0956	5.1331	2.48166	2.53269	2.06255	Spc25	ENSMUSG00000005233	66442	SPC25, NDC80 kinetochore complex component, homolog (S. cerevisiae)
ENSMUSG00000001403.13	chr2	164769898	164778822	+	Ube2c	-2.29942	4.29e-10	3.68e-08	6697	5675	5701	1231	1119	1606	6.844	6.77537	6.81703	4.49283	4.30158	4.73784	Ube2c	ENSMUSG00000001403	68612	ubiquitin-conjugating enzyme E2C
ENSMUSG00000028175.15	chr3	159495433	159529955	+	Depdc1a	-4.21687	4.66e-10	3.9e-08	807	780	650	44	40	43	3.79192	3.9131	3.68531	-0.29764	-0.487209	-0.468921	Depdc1a	ENSMUSG00000028175	76131	DEP domain containing 1a
ENSMUSG00000044201.9	chr18	34732997	34751533	-	Cdc25c	-4.13215	4.72e-10	3.91e-08	778	636	662	45	45	36	3.73915	3.61886	3.71168	-0.265578	-0.319265	-0.722039	Cdc25c	ENSMUSG00000044201	12532	cell division cycle 25C
ENSMUSG00000019773.7	chr10	5799160	5805600	-	Fbxo5	-2.3871	4.97e-10	4.04e-08	1189	1094	940	205	215	236	4.35074	4.4009	4.21719	1.90962	1.92448	1.97383	Fbxo5	ENSMUSG00000019773	67141	F-box protein 5
ENSMUSG00000039748.11	chr1	175880581	175913489	+	Exo1	-1.96118	6.02e-10	4.54e-08	1323	1301	1216	340	344	369	4.50474	4.6508	4.58842	2.63814	2.6013	2.61757	Exo1	ENSMUSG00000039748	26909	exonuclease 1
ENSMUSG00000040084.9	chr2	118598211	118641591	+	Bub1b	-2.01513	6.25e-10	4.65e-08	5996	5689	5186	1463	1645	1366	6.6845	6.77893	6.68045	4.74183	4.85725	4.50441	Bub1b	ENSMUSG00000040084	12236	BUB1B, mitotic checkpoint serine/threonine kinase
ENSMUSG00000064168.4	chr13	23542970	23543357	-	Hist1h2bh	-2.63594	6.23e-10	4.65e-08	903	874	883	143	142	172	3.95398	4.07716	4.12699	1.39153	1.32776	1.51859	Hist1h2bh	ENSMUSG00000114456	319182	histone cluster 1, H2bh
ENSMUSG00000034349.14	chr3	69004738	69034623	+	Smc4	-1.57608	6.35e-10	4.71e-08	11785	9881	10309	3364	3833	4294	7.65932	7.57536	7.67159	5.9428	6.07739	6.15641	Smc4	ENSMUSG00000034349	70099	structural maintenance of chromosomes 4
ENSMUSG00000017499.15	chr11	98907801	98923940	+	Cdc6	-1.68282	6.5e-10	4.77e-08	2775	2569	2401	818	921	841	5.57313	5.63211	5.56962	3.90347	4.02078	3.80496	Cdc6	ENSMUSG00000017499	23834	cell division cycle 6
ENSMUSG00000028873.16	chr4	124918465	124939311	-	Cdca8	-1.57668	7.1e-10	5.13e-08	2180	2012	1858	723	697	746	5.22504	5.27962	5.19982	3.72548	3.61899	3.63213	Cdca8	ENSMUSG00000028873	52276	cell division cycle associated 8
ENSMUSG00000005470.8	chr8	83955507	83970197	+	Asf1b	-1.91713	8.06e-10	5.53e-08	3643	3487	3408	1029	1040	922	5.96571	6.07282	6.07482	4.23436	4.196	3.93754	Asf1b	ENSMUSG00000005470	66929	anti-silencing function 1B histone chaperone
ENSMUSG00000022322.8	chr8	4735976	4779567	-	Shcbp1	-3.04792	8.15e-10	5.53e-08	2237	1795	1773	209	215	337	5.26227	5.11501	5.13229	1.93743	1.92448	2.48688	Shcbp1	ENSMUSG00000022322	20419	Shc SH2-domain binding protein 1
ENSMUSG00000041147.10	chr5	150522630	150570329	+	Brca2	-1.77383	8.97e-10	5.91e-08	4928	3912	4192	1198	1316	1563	6.40153	6.23872	6.3735	4.45364	4.53543	4.6987	Brca2	ENSMUSG00000041147	12190	breast cancer 2, early onset
ENSMUSG00000096807.1	chr13	21722098	21722478	+	Hist1h2bm	-3.80238	9.18e-10	5.99e-08	1161	1218	987	94	90	74	4.31637	4.55573	4.28754	0.78887	0.672787	0.307304	Hist1h2bm	ENSMUSG00000114279	319186	histone cluster 1, H2bm
ENSMUSG00000025395.14	chr10	128015168	128030037	+	Prim1	-2.12119	9.6e-10	6.18e-08	3036	2525	2536	536	732	732	5.70279	5.6072	5.64853	3.29406	3.68963	3.60482	Prim1	ENSMUSG00000025395	19075	DNA primase, p49 subunit
ENSMUSG00000047757.16	chrX	164980592	164997272	+	Fancb	-2.66055	1.02e-09	6.45e-08	688	610	579	98	96	123	3.56191	3.55869	3.51857	0.848679	0.765398	1.0365	Fancb	ENSMUSG00000047757	237211	Fanconi anemia, complementation group B
ENSMUSG00000022391.15	chr15	81704248	81729919	-	Rangap1	-2.28546	1.02e-09	6.45e-08	6133	6010	5798	1357	1456	1148	6.71709	6.85811	6.84137	4.63336	4.68123	4.25367	Rangap1	ENSMUSG00000022391	19387	RAN GTPase activating protein 1
ENSMUSG00000034023.16	chr6	113531682	113597017	+	Fancd2	-3.01943	1.06e-09	6.67e-08	3079	2623	2615	368	272	479	5.72308	5.66212	5.69277	2.75215	2.26305	2.99352	Fancd2	ENSMUSG00000034023	211651	Fanconi anemia, complementation group D2
ENSMUSG00000036777.7	chr9	22331214	22389206	-	Anln	-1.6077	1.18e-09	7.25e-08	4994	4089	3807	1379	1439	1691	6.42072	6.30255	6.23453	4.65656	4.66429	4.81222	Anln	ENSMUSG00000036777	68743	anillin, actin binding protein
ENSMUSG00000050107.2	chr11	73135485	73138294	-	Gsg2	-2.13483	1.26e-09	7.63e-08	1230	1109	1072	290	288	254	4.39963	4.42054	4.40666	2.40902	2.34537	2.07966	Haspin	ENSMUSG00000050107	14841	histone H3 associated protein kinase
ENSMUSG00000022978.11	chr16	90719312	90727404	-	Mis18a	-1.88878	1.25e-09	7.63e-08	2522	2114	2066	568	603	770	5.43524	5.35094	5.35288	3.37764	3.41015	3.67779	Mis18a	ENSMUSG00000022978	66578	MIS18 kinetochore protein A
ENSMUSG00000025574.13	chr11	117815526	117826092	-	Tk1	-1.61908	1.36e-09	8.17e-08	3276	2936	2717	1020	927	1165	5.81254	5.82472	5.74797	4.22169	4.03014	4.27487	Tk1	ENSMUSG00000025574	21877	thymidine kinase 1
ENSMUSG00000022360.7	chr15	58094047	58135082	-	Atad2	-1.18459	1.56e-09	8.86e-08	8729	7731	7584	3444	3882	3988	7.22628	7.22138	7.22874	5.97671	6.09571	6.04977	Atad2	ENSMUSG00000022360	70472	ATPase family, AAA domain containing 2
ENSMUSG00000022385.10	chr15	85859707	85876572	+	Gtse1	-1.90624	1.62e-09	9.05e-08	9936	9369	9062	2793	2901	2426	7.41312	7.4986	7.4856	5.67449	5.67552	5.3328	Gtse1	ENSMUSG00000022385	29870	G two S phase expressed protein 1
ENSMUSG00000027115.14	chr2	109280738	109341747	+	Kif18a	-2.44522	2.08e-09	1.09e-07	779	796	702	155	137	154	3.741	3.94237	3.79626	1.5074	1.27623	1.3596	Kif18a	ENSMUSG00000027115	228421	kinesin family member 18A
ENSMUSG00000001517.14	chr6	128362967	128376146	+	Foxm1	-1.73894	2.51e-09	1.25e-07	3733	3224	3140	1080	923	1245	6.00091	5.9597	5.95668	4.30411	4.02391	4.37065	Foxm1	ENSMUSG00000001517	14235	forkhead box M1
ENSMUSG00000024791.10	chr19	6084983	6091777	+	Cdca5	-2.47178	2.74e-09	1.34e-07	1111	1176	963	198	228	199	4.25289	4.50513	4.25204	1.85962	2.00899	1.72838	Cdca5	ENSMUSG00000024791	67849	cell division cycle associated 5
ENSMUSG00000028312.19	chr4	52439243	52488260	+	Smc2	-1.3863	3.16e-09	1.49e-07	11165	9316	9168	3622	3862	4666	7.58136	7.49041	7.50237	6.0494	6.08826	6.27626	Smc2	ENSMUSG00000028312	14211	structural maintenance of chromosomes 2
ENSMUSG00000006585.3	chr8	122568015	122573554	+	Cdt1	-1.37844	3.29e-09	1.55e-07	4755	4586	4238	1919	1847	1819	6.34998	6.46802	6.38924	5.13314	5.0243	4.91746	Cdt1	ENSMUSG00000006585	67177	chromatin licensing and DNA replication factor 1
ENSMUSG00000069310.3	chr13	23745013	23745501	-	Hist1h3c	-3.50619	3.38e-09	1.58e-07	806	871	664	72	76	70	3.79013	4.0722	3.71603	0.406536	0.430329	0.227687	Hist1h3c	ENSMUSG00000069310	319148	histone cluster 1, H3c
ENSMUSG00000056531.11	chr5	108132875	108233628	+	Ccdc18	-2.34509	3.95e-09	1.78e-07	648	516	580	113	120	132	3.47556	3.31747	3.52105	1.05318	1.08583	1.13798	Ccdc18	ENSMUSG00000056531	73254	coiled-coil domain containing 18
ENSMUSG00000033762.7	chr15	76703553	76710559	-	Recql4	-2.16245	4.04e-09	1.81e-07	1482	1548	1347	343	388	317	4.66841	4.9015	4.73597	2.65079	2.77471	2.39875	Recql4	ENSMUSG00000033762	79456	RecQ protein-like 4
ENSMUSG00000038047.18	chr4	86578855	86612055	-	Haus6	-1.30564	4.62e-09	1.98e-07	2079	1874	1898	772	887	873	5.15662	5.17713	5.23055	3.82002	3.96654	3.8588	Haus6	ENSMUSG00000038047	230376	HAUS augmin-like complex, subunit 6
ENSMUSG00000027654.2	chr2	158768093	158786637	+	Fam83d	-4.10966	5.07e-09	2.12e-07	489	448	429	30	36	20	3.06976	3.11381	3.08642	-0.842636	-0.637235	-1.55431	Fam83d	ENSMUSG00000027654	71878	family with sequence similarity 83, member D
ENSMUSG00000053289.7	chr9	53098454	53248112	-	Ddx10	1.10498	5.16e-09	2.14e-07	2433	2053	2114	4751	4888	5542	5.38341	5.30871	5.386	6.44079	6.42812	6.52446	Ddx10	ENSMUSG00000053289	77591	DEAD (Asp-Glu-Ala-Asp) box polypeptide 10
ENSMUSG00000079553.10	chr17	33875666	33890661	-	Kifc1	-2.13824	6.73e-09	2.64e-07	1538	1486	1417	385	397	306	4.72191	4.84255	4.80904	2.81721	2.80775	2.34788	Kifc1	ENSMUSG00000079553	100502766	kinesin family member C1
ENSMUSG00000035310.15	chr5	100441918	100500639	-	Lin54	-1.26994	8.38e-09	3.09e-07	3261	2618	2606	1148	1205	1402	5.80592	5.65937	5.6878	4.39216	4.40836	4.54192	Lin54	ENSMUSG00000035310	231506	lin-54 homolog (C. elegans)
ENSMUSG00000058729.13	chr1	180641150	180690694	+	Lin9	-1.26748	9.49e-09	3.39e-07	1725	1440	1382	622	661	732	4.8874	4.7972	4.77297	3.50856	3.54254	3.60482	Lin9	ENSMUSG00000058729	72568	lin-9 homolog (C. elegans)
ENSMUSG00000038252.13	chr6	125168007	125191701	-	Ncapd2	-0.938393	9.38e-09	3.39e-07	19737	17122	16311	9486	9578	10550	8.40325	8.36845	8.3335	7.43829	7.39852	7.45316	Ncapd2	ENSMUSG00000038252	68298	non-SMC condensin I complex, subunit D2
ENSMUSG00000026429.8	chr1	134962565	134974162	+	Ube2t	-1.95192	9.46e-09	3.39e-07	827	753	742	176	244	225	3.82721	3.86231	3.87615	1.69015	2.10663	1.90512	Ube2t	ENSMUSG00000026429	67196	ubiquitin-conjugating enzyme E2T
ENSMUSG00000054717.7	chr8	57511907	57515999	+	Hmgb2	-2.44957	9.74e-09	3.46e-07	3779	3882	3534	758	885	585	6.01858	6.22761	6.12719	3.79363	3.96329	3.28166	Hmgb2	ENSMUSG00000054717	97165	high mobility group box 2
ENSMUSG00000041859.10	chr1	20802968	20820312	-	Mcm3	-0.935928	1.01e-08	3.55e-07	12180	11048	10578	5814	6401	6685	7.70688	7.73641	7.70875	6.73207	6.81714	6.79496	Mcm3	ENSMUSG00000041859	17215	minichromosome maintenance complex component 3
ENSMUSG00000019961.16	chr10	91147571	91171582	-	Tmpo	-1.10951	1.02e-08	3.57e-07	8046	7166	7138	3411	3968	3705	7.10874	7.1119	7.14131	5.96282	6.12732	5.94359	Tmpo	ENSMUSG00000019961	21917	thymopoietin
ENSMUSG00000029687.16	chr6	47530139	47595341	-	Ezh2	-1.24864	1.03e-08	3.58e-07	1759	1536	1469	660	682	802	4.91555	4.89027	4.86101	3.59404	3.58763	3.73649	Ezh2	ENSMUSG00000029687	14056	enhancer of zeste 2 polycomb repressive complex 2 subunit
ENSMUSG00000021697.12	chr13	108316332	108407782	+	Depdc1b	-4.16623	1.07e-08	3.7e-07	300	238	233	16	17	12	2.36582	2.20269	2.20718	-1.72898	-1.69778	-2.26801	Depdc1b	ENSMUSG00000021697	218581	DEP domain containing 1B
ENSMUSG00000029730.16	chr5	138164583	138172422	-	Mcm7	-1.18493	1.09e-08	3.76e-07	8270	7826	7047	3439	3885	3557	7.14836	7.23899	7.1228	5.97461	6.09683	5.88478	Mcm7	ENSMUSG00000029730	17220	minichromosome maintenance complex component 7
ENSMUSG00000021707.4	chr13	92354783	92389053	+	Dhfr	-1.46252	1.15e-08	3.93e-07	2382	2125	1989	728	802	1002	5.35286	5.35843	5.29809	3.73541	3.8213	4.05752	Dhfr	ENSMUSG00000021707	13361	dihydrofolate reductase
ENSMUSG00000028884.14	chr4	132768332	132778752	+	Rpa2	-1.69097	1.18e-08	4.02e-07	2461	2382	2163	790	851	689	5.39992	5.5231	5.41905	3.85325	3.9068	3.51754	Rpa2	ENSMUSG00000028884	19891	replication protein A2
ENSMUSG00000028044.6	chr3	89415472	89418383	-	Cks1b	-1.22818	1.24e-08	4.14e-07	2916	2681	2461	1257	1232	1186	5.64462	5.69367	5.60522	4.52297	4.44031	4.30063	Cks1b	ENSMUSG00000028044	54124	CDC28 protein kinase 1b
ENSMUSG00000039994.15	chr10	128232065	128252941	+	Timeless	-1.64036	1.3e-08	4.28e-07	2209	2108	1888	635	825	678	5.2441	5.34684	5.22293	3.53838	3.86207	3.49434	Timeless	ENSMUSG00000039994	21853	timeless circadian clock 1
ENSMUSG00000026873.9	chr2	34893757	34914026	-	Phf19	-1.74793	1.56e-08	4.94e-07	893	902	781	241	299	280	3.93792	4.12263	3.95	2.14251	2.39935	2.21999	Phf19	ENSMUSG00000026873	74016	PHD finger protein 19
ENSMUSG00000036223.15	chr18	74195299	74207818	-	Ska1	-3.86789	1.89e-08	5.65e-07	664	605	527	56	53	28	3.51072	3.54683	3.38293	0.0468061	-0.0855922	-1.07897	Ska1	ENSMUSG00000036223	66468	spindle and kinetochore associated complex subunit 1
ENSMUSG00000039187.16	chr7	79391929	79450264	+	Fanci	-1.68112	2.01e-08	5.9e-07	1491	1353	1231	426	526	413	4.67715	4.70732	4.6061	2.96303	3.21323	2.77988	Fanci	ENSMUSG00000039187	208836	Fanconi anemia, complementation group I
ENSMUSG00000001151.9	chr10	76351254	76442912	-	Pcnt	-1.1992	2.23e-08	6.41e-07	3752	3508	3225	1563	1765	1558	6.00823	6.08148	5.99521	4.83719	4.9588	4.69408	Pcnt	ENSMUSG00000001151	18541	pericentrin (kendrin)
ENSMUSG00000035439.13	chr8	71248561	71272934	-	Haus8	-1.38756	2.26e-08	6.47e-07	1287	1139	1110	430	537	481	4.46495	4.45903	4.4569	2.9765	3.24306	2.99953	Haus8	ENSMUSG00000035439	76478	4HAUS augmin-like complex, subunit 8
ENSMUSG00000035293.13	chr12	51348061	51376986	+	G2e3	-1.27784	2.3e-08	6.54e-07	2057	1642	1697	760	844	770	5.14127	4.98652	5.0691	3.79743	3.89489	3.67779	G2e3	ENSMUSG00000035293	217558	G2/M-phase specific E3 ubiquitin ligase
ENSMUSG00000099583.1	chr13	23575763	23576322	+	Hist1h3d	-2.53914	3.4e-08	8.94e-07	1236	1454	1007	232	228	213	4.40664	4.81115	4.31647	2.08771	2.00899	1.82623	Hist1h3d	ENSMUSG00000099583	319149	histone cluster 1, H3d
ENSMUSG00000034329.16	chr11	86058138	86201193	-	Brip1	-1.77174	3.6e-08	9.29e-07	2729	2133	2202	657	628	948	5.54902	5.36385	5.44483	3.58747	3.46871	3.97764	Brip1	ENSMUSG00000034329	237911	BRCA1 interacting protein C-terminal helicase 1
ENSMUSG00000002835.8	chr17	56040416	56068026	+	Chaf1a	-1.04766	4.45e-08	1.08e-06	3419	3340	3331	1762	1651	1810	5.87417	6.01069	6.04186	5.01003	4.8625	4.91031	Chaf1a	ENSMUSG00000002835	27221	chromatin assembly factor 1, subunit A (p150)
ENSMUSG00000041064.13	chr9	65587160	65595967	+	Pif1	-1.72046	4.57e-08	1.1e-06	521	447	448	135	173	152	3.16112	3.11059	3.14887	1.30878	1.61173	1.3408	Pif1	ENSMUSG00000041064	208084	PIF1 5'-to-3' DNA helicase
ENSMUSG00000024590.8	chr18	56707813	56753424	+	Lmnb1	-1.35312	4.86e-08	1.15e-06	1732	1589	1464	709	687	611	4.89324	4.9392	4.85609	3.69729	3.59816	3.34434	Lmnb1	ENSMUSG00000024590	16906	lamin B1
ENSMUSG00000034485.9	chr9	60794548	60880370	+	Uaca	1.12241	4.86e-08	1.15e-06	616	526	554	1313	1311	1321	3.40255	3.34513	3.45495	4.58583	4.52994	4.4561	Uaca	ENSMUSG00000034485	72565	uveal autoantigen with coiled-coil domains and ankyrin repeats
ENSMUSG00000028693.15	chr4	116601052	116627941	-	Nasp	-0.990424	4.88e-08	1.16e-06	5375	4942	4766	2405	2915	2816	6.52678	6.57587	6.55862	5.45875	5.68247	5.54782	Nasp	ENSMUSG00000028693	50927	nuclear autoantigenic sperm protein (histone-binding)
ENSMUSG00000038644.14	chr7	44532746	44548849	-	Pold1	-1.12325	5.07e-08	1.19e-06	3390	3501	3081	1607	1679	1605	5.86188	6.0786	5.92932	4.87723	4.88676	4.73694	Pold1	ENSMUSG00000038644	18971	polymerase (DNA directed), delta 1, catalytic subunit
ENSMUSG00000068744.12	chr3	108383839	108388231	+	Psrc1	-0.852242	5.13e-08	1.2e-06	4823	4458	4416	2693	2659	2759	6.37046	6.42719	6.44859	5.62189	5.54988	5.51833	Psrc1	ENSMUSG00000068744	56742	proline/serine-rich coiled-coil 1
ENSMUSG00000031016.9	chr7	110122046	110143286	+	Wee1	-1.35215	5.17e-08	1.21e-06	947	838	757	314	383	367	4.02258	4.01651	3.905	2.52354	2.75602	2.60974	Wee1	ENSMUSG00000031016	22390	WEE 1 homolog 1 (S. pombe)
ENSMUSG00000037628.9	chr14	46760541	46771525	+	Cdkn3	-2.59796	5.23e-08	1.22e-06	250	225	198	36	45	37	2.10326	2.12183	1.9729	-0.583548	-0.319265	-0.683045	Cdkn3	ENSMUSG00000037628	72391	cyclin-dependent kinase inhibitor 3
ENSMUSG00000028560.11	chr4	98923810	98935543	+	Usp1	-0.846929	5.61e-08	1.29e-06	4598	3962	3857	2244	2530	2602	6.30154	6.25704	6.25335	5.35881	5.47815	5.43382	Usp1	ENSMUSG00000028560	230484	ubiquitin specific peptidase 1
ENSMUSG00000025358.15	chr10	128697939	128705051	-	Cdk2	-0.86998	5.76e-08	1.32e-06	4064	3591	3591	2057	2092	2438	6.12346	6.11521	6.15027	5.2333	5.20395	5.33991	Cdk2	ENSMUSG00000025358	12566	cyclin-dependent kinase 2
ENSMUSG00000055884.7	chr12	65075606	65132058	+	Fancm	-1.04078	5.84e-08	1.33e-06	1996	1619	1658	837	957	941	5.09785	4.96618	5.03557	3.93657	4.07607	3.96695	Fancm	ENSMUSG00000055884	104806	Fanconi anemia, complementation group M
ENSMUSG00000029910.14	chr6	66535390	66547220	+	Mad2l1	-1.6078	6.17e-08	1.37e-06	6273	4974	4943	1850	1542	2331	6.74965	6.58518	6.61122	5.08033	4.764	5.27518	Mad2l1	ENSMUSG00000029910	56150	MAD2 mitotic arrest deficient-like 1
ENSMUSG00000027353.14	chr2	132816141	132844197	+	Mcm8	-1.39711	6.41e-08	1.41e-06	1024	894	856	350	425	354	4.1353	4.10978	4.08221	2.6799	2.90596	2.55778	Mcm8	ENSMUSG00000027353	66634	minichromosome maintenance 8 homologous recombination repair factor
ENSMUSG00000072980.3	chr2	119609512	119618469	-	Oip5	-2.33803	6.58e-08	1.44e-06	313	292	318	67	54	74	2.42692	2.49714	2.65505	0.303443	-0.0588749	0.307304	Oip5	ENSMUSG00000072980	70645	Opa interacting protein 5
ENSMUSG00000029283.17	chr5	106964322	106984432	+	Cdc7	-1.16251	7.1e-08	1.52e-06	2134	1837	1819	811	874	1092	5.19428	5.14837	5.16923	3.89107	3.94526	4.18155	Cdc7	ENSMUSG00000029283	12545	cell division cycle 7 (S. cerevisiae)
ENSMUSG00000027959.13	chr3	116594982	116631004	+	Sass6	-0.807779	7.89e-08	1.65e-06	5319	4589	4640	2771	2854	3265	6.51167	6.46896	6.51997	5.66308	5.65196	5.76122	Sass6	ENSMUSG00000027959	72776	SAS-6 centriolar assembly protein
ENSMUSG00000068394.4	chr2	125563088	125625113	-	Cep152	-1.15476	7.97e-08	1.66e-06	1028	929	899	403	487	483	4.14092	4.16515	4.15288	2.88305	3.1022	3.00551	Cep152	ENSMUSG00000068394	99100	centrosomal protein 152
ENSMUSG00000021377.14	chr13	47084775	47106201	-	Dek	-1.01544	9.01e-08	1.84e-06	10407	8816	8935	4409	4735	5813	7.47993	7.41083	7.46523	6.33303	6.38224	6.59333	Dek	ENSMUSG00000021377	110052	DEK oncogene (DNA binding)
ENSMUSG00000005370.3	chr17	87975050	87990883	+	Msh6	-0.767911	9.11e-08	1.86e-06	9402	8097	7919	4860	5354	5742	7.33343	7.2881	7.2911	6.47352	6.55948	6.5756	Msh6	ENSMUSG00000005370	17688	mutS homolog 6
ENSMUSG00000041219.14	chr2	113831492	113848661	-	Arhgap11a	-1.03996	9.17e-08	1.87e-06	3742	3026	2728	1567	1575	1765	6.00438	5.86828	5.75379	4.84088	4.79453	4.874	Arhgap11a	ENSMUSG00000041219	228482	Rho GTPase activating protein 11A
ENSMUSG00000027454.10	chr2	150905400	150931280	+	Gins1	-2.17504	1.02e-07	2.05e-06	388	372	309	67	100	87	2.73637	2.84594	2.6137	0.303443	0.823993	0.539347	Gins1	ENSMUSG00000027454	69270	GINS complex subunit 1 (Psf1 homolog)
ENSMUSG00000029521.7	chr5	110839979	110874145	+	Chek2	-1.00739	1.07e-07	2.12e-06	2374	1985	1980	1020	1222	1129	5.348	5.26013	5.29155	4.22169	4.42856	4.2296	Chek2	ENSMUSG00000029521	50883	checkpoint kinase 2
ENSMUSG00000002870.8	chr6	88883474	88898780	-	Mcm2	-0.860972	1.08e-07	2.12e-06	7657	7643	6872	4185	4460	4402	7.03725	7.20486	7.08652	6.25781	6.29593	6.19224	Mcm2	ENSMUSG00000002870	17216	minichromosome maintenance complex component 2
ENSMUSG00000027323.10	chr2	119112793	119147445	+	Rad51	-0.91411	1.14e-07	2.24e-06	1340	1248	1192	678	701	765	4.52315	4.59082	4.55968	3.63283	3.62724	3.66839	Rad51	ENSMUSG00000027323	19361	RAD51 recombinase
ENSMUSG00000027469.16	chr2	152847964	152895321	+	Tpx2	-1.74113	1.3e-07	2.47e-06	16198	13235	12746	4098	3650	5975	8.11817	7.99697	7.97772	6.22751	6.00682	6.63298	Dazl	ENSMUSG00000010592	13164	deleted in azoospermia-like
ENSMUSG00000051517.14	chr4	43496142	43499695	-	Arhgef39	-2.29491	1.31e-07	2.48e-06	403	436	391	104	92	74	2.79102	3.07468	2.95277	0.933986	0.704322	0.307304	Arhgef39	ENSMUSG00000051517	230098	Rho guanine nucleotide exchange factor (GEF) 39
ENSMUSG00000032113.15	chr9	36708482	36727065	-	Chek1	-1.02193	2.01e-07	3.5e-06	1132	981	1013	483	553	612	4.27989	4.24369	4.32503	3.144	3.28538	3.3467	Chek1	ENSMUSG00000032113	12649	checkpoint kinase 1
ENSMUSG00000032815.16	chr8	123268300	123318576	-	Fanca	-0.921158	2.03e-07	3.53e-06	2270	2109	1874	1112	1250	1165	5.28339	5.34753	5.21219	4.34622	4.46123	4.27487	Fanca	ENSMUSG00000032815	14087	Fanconi anemia, complementation group A
ENSMUSG00000060678.4	chr13	23698060	23698454	-	Hist1h4c	-1.69911	2.08e-07	3.58e-06	757	736	700	186	296	250	3.6997	3.82938	3.79214	1.76966	2.38483	2.0568	Hist1h4c	ENSMUSG00000060678	319155	histone cluster 1, H4c
ENSMUSG00000027883.15	chr3	108678638	108722309	-	Gpsm2	-1.03193	2.38e-07	3.95e-06	2592	2350	2267	1092	1419	1274	5.47473	5.50359	5.48679	4.32004	4.64411	4.40385	Gpsm2	ENSMUSG00000027883	76123	G-protein signalling modulator 2 (AGS3-like, C. elegans)
ENSMUSG00000030654.9	chr7	118118891	118129662	-	Arl6ip1	-1.05024	2.43e-07	4.01e-06	7761	7146	6762	3498	4227	3498	7.05672	7.10786	7.06324	5.99915	6.21853	5.86066	Arl6ip1	ENSMUSG00000030654	54208	ADP-ribosylation factor-like 6 interacting protein 1
ENSMUSG00000024151.13	chr17	87672330	87723713	+	Msh2	-0.911379	2.58e-07	4.22e-06	2415	2123	2061	1114	1369	1274	5.3727	5.35707	5.34938	4.34881	4.59237	4.40385	Msh2	ENSMUSG00000024151	17685	mutS homolog 2
ENSMUSG00000028587.18	chr4	108579423	108614833	+	Orc1	-1.18839	2.6e-07	4.24e-06	1139	1108	974	478	446	592	4.28878	4.41924	4.26842	3.129	2.97546	3.29881	Orc1	ENSMUSG00000028587	18392	origin recognition complex, subunit 1
ENSMUSG00000044702.13	chr7	122107262	122132985	-	Palb2	-0.996789	2.72e-07	4.4e-06	1660	1273	1372	730	726	843	4.832	4.61943	4.76249	3.73937	3.67776	3.80838	Palb2	ENSMUSG00000044702	233826	partner and localizer of BRCA2
ENSMUSG00000027330.16	chr2	131186949	131198497	+	Cdc25b	-0.9718	2.74e-07	4.42e-06	1577	1547	1613	814	855	912	4.75802	4.90057	4.99588	3.8964	3.91356	3.92182	Cdc25b	ENSMUSG00000027330	12531	cell division cycle 25B
ENSMUSG00000074802.10	chr10	89408823	89443967	-	Gas2l3	-0.994477	2.85e-07	4.55e-06	3108	2710	2546	1417	1330	1757	5.7366	5.70919	5.6542	4.69576	4.55069	4.86744	Gas2l3	ENSMUSG00000074802	237436	growth arrest-specific 2 like 3
ENSMUSG00000018362.14	chr11	106988629	106999541	-	Kpna2	-0.670646	3.27e-07	5.07e-06	9785	8607	8289	5718	6158	6017	7.39103	7.37622	7.35697	6.70805	6.7613	6.64308	Kpna2	ENSMUSG00000018362	16647	karyopherin (importin) alpha 2
ENSMUSG00000069268.4	chr13	23573736	23574196	-	Hist1h2bf	-2.29484	3.56e-07	5.4e-06	399	402	320	100	85	63	2.77665	2.95769	2.66408	0.877679	0.590793	0.0768207	Hist1h2bf	ENSMUSG00000069268	319180	histone cluster 1, H2bf
ENSMUSG00000029366.10	chr5	88764996	88783281	+	Dck	-0.969531	3.87e-07	5.76e-06	3058	2547	2480	1405	1304	1716	5.71321	5.61971	5.61632	4.68349	4.52222	4.83339	Dck	ENSMUSG00000029366	13178	deoxycytidine kinase
ENSMUSG00000030254.16	chr6	112619850	112696686	-	Rad18	-0.738785	4.83e-07	6.86e-06	2881	2370	2427	1506	1607	1802	5.6272	5.51582	5.58516	4.78361	4.82354	4.90392	Rad18	ENSMUSG00000030254	58186	RAD18 E3 ubiquitin protein ligase
ENSMUSG00000061607.14	chr17	35841515	35859670	+	Mdc1	-0.815006	6.43e-07	8.61e-06	4866	3980	4150	2566	2373	2965	6.38327	6.26358	6.35897	5.55221	5.38574	5.6222	Mdc1	ENSMUSG00000061607	240087	mediator of DNA damage checkpoint 1
ENSMUSG00000033589.3	chr14	70545251	70548933	+	Reep4	-0.845605	6.82e-07	9.02e-06	2701	2525	2254	1508	1332	1614	5.53414	5.6072	5.47849	4.78553	4.55286	4.74501	Reep4	ENSMUSG00000033589	72549	receptor accessory protein 4
ENSMUSG00000049932.3	chr9	44334694	44336077	+	H2afx	-0.99783	6.92e-07	9.14e-06	4123	4675	3903	2260	2138	2390	6.14425	6.49575	6.27045	5.36905	5.23532	5.31123	H2afx	ENSMUSG00000049932	15270	H2A histone family, member X
ENSMUSG00000027496.15	chr2	172356190	172370535	-	Aurka	-0.800139	7.48e-07	9.77e-06	5087	4870	4158	2921	2901	2822	6.44734	6.5547	6.36175	5.73912	5.67552	5.55089	Aurka	ENSMUSG00000027496	20878	aurora kinase A
ENSMUSG00000061615.2	chr13	23751126	23751598	+	Hist1h2ab	-2.86623	8.38e-07	1.07e-05	173	148	115	17	29	18	1.57339	1.51916	1.19165	-1.64409	-0.944416	-1.70241	Hist1h2ab	ENSMUSG00000061615	319172	histone cluster 1, H2ab
ENSMUSG00000037894.13	chr3	137864487	137866922	+	H2afz	-0.762319	9.41e-07	1.17e-05	4687	4477	4132	2768	2938	2677	6.3292	6.43332	6.3527	5.66152	5.6938	5.47481	H2afz	ENSMUSG00000037894	51788	H2A histone family, member Z
ENSMUSG00000069272.5	chr13	23570662	23571121	-	Hist1h2ae	-2.38215	9.58e-07	1.19e-05	208	189	208	57	37	33	1.8385	1.8709	2.04381	0.0721172	-0.59824	-0.845775	Hist1h2ae	ENSMUSG00000069272	319166	histone cluster 1, H2ae
ENSMUSG00000025323.9	chr12	118234933	118301440	-	Sp4	-1.17324	1.06e-06	1.27e-05	1047	818	874	375	507	421	4.16733	3.98168	4.11222	2.7793	3.1602	2.80752	Sp4	ENSMUSG00000025323	20688	trans-acting transcription factor 4
ENSMUSG00000024742.15	chr19	10199132	10204169	-	Fen1	-1.22697	1.09e-06	1.3e-05	3973	4079	3610	1775	2063	1530	6.09079	6.29902	6.15788	5.02064	5.18382	4.66792	Fen1	ENSMUSG00000024742	14156	flap structure specific endonuclease 1
ENSMUSG00000022314.9	chr15	51962605	51991760	-	Rad21	-0.75776	1.23e-06	1.43e-05	8770	7558	7326	4443	4738	5836	7.23304	7.18873	7.17881	6.34411	6.38316	6.59902	Rad21	ENSMUSG00000022314	19357	RAD21 cohesin complex component
ENSMUSG00000021671.8	chr13	96388294	96415587	+	Poc5	-0.641408	1.96e-06	2.07e-05	1593	1403	1395	927	1034	1048	4.77258	4.75966	4.78647	4.08383	4.18766	4.12225	Poc5	ENSMUSG00000021671	67463	POC5 centriolar protein
ENSMUSG00000027160.16	chr2	110017817	110173360	+	Ccdc34	-0.975585	2.29e-06	2.36e-05	2242	2037	2266	1227	1010	1339	5.26549	5.29743	5.48615	4.48813	4.15379	4.47561	Ccdc34	ENSMUSG00000027160	68201	coiled-coil domain containing 34
ENSMUSG00000040549.16	chr2	91526762	91620664	+	Ckap5	-0.560549	4.55e-06	4.12e-05	8292	6975	7109	4974	5743	5492	7.15219	7.07292	7.13543	6.50696	6.66066	6.51138	Ckap5	ENSMUSG00000040549	75786	cytoskeleton associated protein 5
ENSMUSG00000022673.4	chr16	15623897	15637400	-	Mcm4	-0.55826	4.78e-06	4.29e-05	8247	7688	6904	5213	5803	5548	7.14434	7.21333	7.09322	6.57466	6.67565	6.52602	Mcm4	ENSMUSG00000022673	17217	minichromosome maintenance complex component 4
ENSMUSG00000068101.10	chr15	82233779	82244747	-	Cenpm	-1.08058	5.23e-06	4.61e-05	676	659	637	344	269	393	3.53654	3.67007	3.65618	2.65499	2.24708	2.70836	Cenpm	ENSMUSG00000068101	66570	centromere protein M
ENSMUSG00000022070.6	chr14	99046427	99074537	+	Bora	-0.651447	1.36e-05	0.00010062	1732	1327	1278	961	934	1039	4.89324	4.67934	4.66014	4.13577	4.04099	4.10981	Bora	ENSMUSG00000022070	77744	bora, aurora kinase A activator
ENSMUSG00000026708.16	chr1	161070713	161086724	+	Cenpl	-1.29533	1.57e-05	0.00011272	374	299	278	116	180	124	2.68342	2.53125	2.46144	1.09081	1.6688	1.04814	Cenpl	ENSMUSG00000026708	70454	centromere protein L
ENSMUSG00000069270.5	chr13	23683449	23683924	-	Hist1h2ac	-2.1346	1.69e-05	0.00011899	106	75	118	25	26	20	0.869306	0.543247	1.22865	-1.10095	-1.09914	-1.55431	Hist1h2ac	ENSMUSG00000069270	319164	histone cluster 1, H2ac
ENSMUSG00000045969.8	chr8	11555571	11563251	+	Ing1	-0.580766	2.02e-05	0.000138	1006	995	954	693	698	720	4.10973	4.26412	4.2385	3.66438	3.62106	3.58099	Ing1	ENSMUSG00000045969	26356	inhibitor of growth family, member 1
ENSMUSG00000052798.12	chr10	117750624	117792705	-	Nup107	-0.708461	2.17e-05	0.0001455	2399	2254	2083	1374	1694	1360	5.36311	5.44343	5.3647	4.65132	4.89958	4.49806	Nup107	ENSMUSG00000052798	103468	nucleoporin 107
ENSMUSG00000020652.17	chr12	4196004	4234294	-	Cenpo	-0.564949	2.32e-05	0.0001542	1042	1014	993	701	755	747	4.16043	4.2914	4.29628	3.68093	3.73423	3.63407	Cenpo	ENSMUSG00000020652	52504	centromere protein O
ENSMUSG00000033411.16	chr2	121956001	122013642	+	Ctdspl2	-0.593424	2.57e-05	0.00016829	3376	2818	2710	1856	2345	2113	5.85591	5.76555	5.74425	5.085	5.36862	5.13355	Ctdspl2	ENSMUSG00000033411	329506	CTD (carboxy-terminal domain, RNA polymerase II, polypeptide A) small phosphatase like 2
ENSMUSG00000091625.8	chr6	56701063	56704710	-	Lsm5	-0.623133	2.82e-05	0.00018122	914	888	786	542	645	610	3.97144	4.10007	3.9592	3.31011	3.50721	3.34198	Lsm5	ENSMUSG00000091625	66373	LSM5 homolog, U6 small nuclear RNA and mRNA degradation associated
ENSMUSG00000020739.11	chr11	115564434	115583985	+	Nup85	-0.580546	3.02e-05	0.00019068	3668	3282	2925	2262	2566	2226	5.97557	5.98542	5.85437	5.37033	5.49853	5.2087	Nup85	ENSMUSG00000020739	445007	nucleoporin 85
ENSMUSG00000024472.9	chr18	44380502	44424969	+	Dcp2	-0.456769	4e-05	0.00024066	1627	1444	1449	1095	1225	1201	4.80304	4.8012	4.84124	4.324	4.4321	4.31876	Dcp2	ENSMUSG00000024472	70640	decapping mRNA 2
ENSMUSG00000027490.17	chr2	154559407	154569892	-	E2f1	-0.715272	6.43e-05	0.00035591	627	643	630	425	432	382	3.42807	3.63464	3.64025	2.95964	2.9295	2.66745	E2f1	ENSMUSG00000027490	13555	E2F transcription factor 1
ENSMUSG00000017548.15	chr11	79993106	80034123	+	Suz12	-0.463563	6.87e-05	0.000375	3797	3129	3228	2363	2843	2666	6.02543	5.91656	5.99655	5.43334	5.64639	5.46887	Suz12	ENSMUSG00000017548	52615	SUZ12 polycomb repressive complex 2 subunit
ENSMUSG00000035024.15	chr9	27030175	27095311	+	Ncapd3	-0.358018	6.93e-05	0.00037701	4631	4002	4074	3327	3603	3662	6.31186	6.27153	6.33231	5.92685	5.98812	5.92675	Ncapd3	ENSMUSG00000035024	78658	non-SMC condensin II complex, subunit D3
ENSMUSG00000028453.10	chr4	43002343	43010506	-	Fancg	-0.557797	7e-05	0.00038019	714	681	666	503	460	535	3.61539	3.71741	3.72036	3.20248	3.02	3.15288	Fancg	ENSMUSG00000028453	60534	Fanconi anemia, complementation group G
ENSMUSG00000014226.10	chr1	160202367	160212875	-	Cacybp	0.444469	7.73e-05	0.00041119	7261	6210	6035	8204	9967	10267	6.96065	6.90534	6.89916	7.22883	7.45596	7.41393	Cacybp	ENSMUSG00000014226	12301	calcyclin binding protein
ENSMUSG00000075266.4	chr10	30196011	30200540	-	Cenpw	-1.05749	0.00011114	0.00055635	283	280	273	101	174	163	2.2818	2.4367	2.4353	0.891963	1.62002	1.44128	Cenpw	ENSMUSG00000075266	66311	centromere protein W
ENSMUSG00000026434.12	chr1	131910534	131936321	+	Nucks1	-0.330726	0.00013053	0.00063656	19314	16431	16627	13959	15224	15278	8.37199	8.30902	8.36119	7.99559	8.06705	7.98735	Nucks1	ENSMUSG00000026434	98415	nuclear casein kinase and cyclin-dependent kinase substrate 1
ENSMUSG00000006678.6	chrX	93304767	93632155	-	Pola1	-0.448894	0.00014554	0.00069276	2557	1969	1989	1616	1591	1878	5.45512	5.24846	5.29809	4.88528	4.80911	4.9635	Pola1	ENSMUSG00000006678	18968	polymerase (DNA directed), alpha 1
ENSMUSG00000096472.1	chr9	21288463	21291209	-	Cdkn2d	-0.635964	0.00016772	0.00077834	499	465	464	363	300	323	3.09894	3.16748	3.19944	2.73244	2.40416	2.42576	Cdkn2d	ENSMUSG00000096472	12581	cyclin-dependent kinase inhibitor 2D (p19, inhibits CDK4)
ENSMUSG00000060860.8	chr7	4794546	4812590	-	Ube2s	-0.379745	0.0001765	0.00081196	6533	6277	5960	5070	5335	5022	6.80824	6.92082	6.88112	6.53454	6.55435	6.38233	Ube2s	ENSMUSG00000060860	77891	ubiquitin-conjugating enzyme E2S
ENSMUSG00000031821.11	chr8	120578633	120589304	-	Gins2	-0.35	0.00017751	0.00081611	1998	1864	1748	1488	1530	1688	5.0993	5.16942	5.1118	4.76627	4.75273	4.80966	Gins2	ENSMUSG00000031821	272551	GINS complex subunit 2 (Psf2 homolog)
ENSMUSG00000027478.15	chr2	153649450	153687730	+	Dnmt3b	-0.630183	0.00023018	0.00101242	294	297	254	186	191	205	2.33672	2.52159	2.33142	1.76966	1.75414	1.77113	Dnmt3b	ENSMUSG00000027478	13436	DNA methyltransferase 3B
ENSMUSG00000028614.14	chr4	107367784	107416346	+	Ndc1	-0.299108	0.0002604	0.00112251	7034	6554	6189	5326	5791	6078	6.91483	6.98311	6.93551	6.6056	6.67266	6.65764	Ndc1	ENSMUSG00000028614	72787	NDC1 transmembrane nucleoporin
ENSMUSG00000026565.18	chr1	165865154	166002678	-	Pou2f1	-0.480241	0.00029279	0.00123301	2424	2221	2349	1674	1595	2125	5.37807	5.42216	5.53804	4.93614	4.81273	5.14172	Pou2f1	ENSMUSG00000026565	18986	POU domain, class 2, transcription factor 1
ENSMUSG00000029836.15	chr6	51470360	51483704	+	Cbx3	-0.377149	0.00039024	0.00156592	2397	2141	2118	1629	1993	1869	5.36191	5.36925	5.38873	4.89684	5.13403	4.95657	Cbx3	ENSMUSG00000029836	12417	chromobox 3
ENSMUSG00000059834.12	chr3	41626720	41742514	-	Sclt1	-0.428614	0.00064472	0.00239362	1080	831	942	721	792	746	4.21208	4.00441	4.22025	3.72148	3.80321	3.63213	Sclt1	ENSMUSG00000059834	67161	sodium channel and clathrin linker 1
ENSMUSG00000028702.15	chr4	116094264	116123690	-	Rad54l	-0.266809	0.00066277	0.00244344	5124	4733	4393	4121	4194	4333	6.45779	6.51353	6.44106	6.23558	6.20722	6.16945	Rad54l	ENSMUSG00000028702	19366	RAD54 like (S. cerevisiae)
ENSMUSG00000041346.11	chr11	69561758	69580255	-	Wrap53	-0.348077	0.00078884	0.00281678	1051	928	848	750	757	865	4.17283	4.1636	4.06867	3.77834	3.73804	3.84553	Wrap53	ENSMUSG00000041346	216853	WD repeat containing, antisense to Trp53
ENSMUSG00000030726.16	chr7	100082111	100121565	-	Pold3	-0.542284	0.00084987	0.00300046	2701	2320	2268	1637	1489	2301	5.53414	5.48506	5.48742	4.90391	4.71355	5.25649	Pold3	ENSMUSG00000030726	67967	polymerase (DNA-directed), delta 3, accessory subunit
ENSMUSG00000022911.10	chr16	62793685	62847040	-	Arl13b	-0.351681	0.00085751	0.00302536	1069	898	844	715	796	840	4.19732	4.11622	4.06186	3.70944	3.81047	3.80324	Arl13b	ENSMUSG00000022911	68146	ADP-ribosylation factor-like 13B
ENSMUSG00000029267.17	chr5	108065674	108109004	+	Mtf2	-0.44165	0.0008595	0.00303029	2177	1810	1886	1465	1754	1418	5.22305	5.12701	5.2214	4.7438	4.94979	4.55829	Mtf2	ENSMUSG00000029267	17765	metal response element binding transcription factor 2
ENSMUSG00000007836.6	chr13	58125879	58128556	-	Hnrnpa0	-0.389961	0.00098778	0.00339206	2487	2776	2496	2079	2062	2180	5.41508	5.74389	5.62559	5.24865	5.18312	5.17858	Hnrnpa0	ENSMUSG00000007836	77134	heterogeneous nuclear ribonucleoprotein A0
ENSMUSG00000038759.15	chr6	35177421	35247596	+	Nup205	-0.264276	0.00106921	0.00361184	13292	11815	11538	10102	11457	11061	7.83292	7.83324	7.83407	7.52905	7.65695	7.5214	Nup205	ENSMUSG00000038759	70699	nucleoporin 205
ENSMUSG00000054099.11	chr5	8422850	8454797	+	Slc25a40	-0.466067	0.0011115	0.00372715	882	783	726	562	545	756	3.92005	3.91863	3.84472	3.36234	3.26438	3.65133	Slc25a40	ENSMUSG00000054099	319653	solute carrier family 25, member 40
ENSMUSG00000036202.15	chr2	52072837	52122383	+	Rif1	-0.367053	0.00115876	0.00385657	8093	6461	6579	5215	5439	6917	7.11714	6.9625	7.02366	6.57522	6.5822	6.84417	Rif1	ENSMUSG00000036202	51869	replication timing regulatory factor 1
ENSMUSG00000027752.15	chr3	54728678	54735393	-	Exosc8	-0.427857	0.00133057	0.00432972	3011	2379	2303	1939	1759	2432	5.69086	5.52129	5.50951	5.1481	4.95389	5.33636	Exosc8	ENSMUSG00000027752	69639	exosome component 8
ENSMUSG00000002718.14	chr2	166906040	166946389	+	Cse1l	-0.294401	0.00148712	0.00474746	6946	6045	5912	5067	5984	5434	6.89667	6.86649	6.86945	6.53369	6.71996	6.49607	Cse1l	ENSMUSG00000002718	110750	chromosome segregation 1-like (S. cerevisiae)
ENSMUSG00000054115.11	chr15	9111985	9155425	-	Skp2	-0.318561	0.00162095	0.00509094	2680	2462	2336	1986	1962	2490	5.52288	5.57075	5.53004	5.18264	5.11142	5.37036	Skp2	ENSMUSG00000054115	27401	S-phase kinase-associated protein 2 (p45)
ENSMUSG00000021215.14	chr13	3882565	3918220	-	Net1	-0.499471	0.00209011	0.00628509	2824	2339	2377	1766	1557	2465	5.59838	5.49683	5.55513	5.01331	4.77796	5.3558	Net1	ENSMUSG00000021215	56349	neuroepithelial cell transforming gene 1
ENSMUSG00000020235.16	chr10	81366222	81378516	-	Fzr1	-0.309394	0.00235988	0.00692251	2525	2470	2153	2083	2100	1978	5.43695	5.57543	5.41237	5.25142	5.20946	5.03833	Fzr1	ENSMUSG00000020235	56371	fizzy and cell division cycle 20 related 1
ENSMUSG00000022748.7	chr16	57302199	57606825	-	Cmss1	0.418612	0.00240525	0.00704213	286	268	281	373	425	396	2.29699	2.37362	2.47689	2.77159	2.90596	2.71931	Cmss1	ENSMUSG00000022748	66497	cms small ribosomal subunit 1
ENSMUSG00000061479.15	chr7	27187005	27196271	-	Snrpa	0.340416	0.00430878	0.0114045	6117	5523	5227	7577	6430	9005	6.71332	6.73621	6.69181	7.11413	6.82366	7.22473	Snrpa	ENSMUSG00000061479	53607	small nuclear ribonucleoprotein polypeptide A
ENSMUSG00000027714.11	chr3	36552606	36565727	+	Exosc9	-0.334704	0.00645156	0.0159654	4887	4074	4388	3494	3280	4645	6.38948	6.29725	6.43941	5.9975	5.85264	6.26975	Exosc9	ENSMUSG00000027714	50911	exosome component 9
ENSMUSG00000029715.5	chr5	137501438	137502518	-	Pop7	0.356775	0.00665036	0.0163597	495	527	457	656	730	639	3.08734	3.34787	3.17753	3.58528	3.68568	3.40894	Pop7	ENSMUSG00000029715	74097	processing of precursor 7, ribonuclease P family, (S. cerevisiae)
ENSMUSG00000026709.10	chr1	161040601	161070658	-	Dars2	-0.227215	0.00674769	0.0165805	2487	2200	2033	1836	2157	2144	5.41508	5.40846	5.32965	5.06937	5.24809	5.15456	Dars2	ENSMUSG00000026709	226539	aspartyl-tRNA synthetase 2 (mitochondrial)
ENSMUSG00000024054.13	chr17	71344489	71475343	-	Smchd1	-0.186774	0.0137528	0.0299322	6595	5347	5564	4946	5495	5992	6.82186	6.68949	6.78194	6.49882	6.59698	6.63708	Smchd1	ENSMUSG00000024054	74355	SMC hinge domain containing 1
ENSMUSG00000046111.16	chr9	15316915	15357788	-	Cep295	-0.172689	0.0149023	0.0320518	4925	4117	3959	3904	3935	4468	6.40065	6.3124	6.291	6.15755	6.11527	6.21371	Cep295	ENSMUSG00000046111	319675	centrosomal protein 295
ENSMUSG00000060288.13	chr4	119300010	119320546	-	Ppih	-0.249617	0.0149306	0.0320898	2199	1952	1886	1675	1619	2168	5.23756	5.23595	5.2214	4.937	4.83427	5.17062	Ppih	ENSMUSG00000060288	66101	peptidyl prolyl isomerase H
ENSMUSG00000021461.16	chr13	63304709	63497278	-	Fancc	-0.365924	0.0157469	0.033567	373	302	289	220	260	324	2.67956	2.54563	2.51732	2.01126	2.19808	2.43021	Fancc	ENSMUSG00000021461	14088	Fanconi anemia, complementation group C
ENSMUSG00000033752.7	chr3	84087933	84155786	-	Mnd1	-0.261572	0.0207784	0.0422204	495	427	406	374	361	451	3.08734	3.04462	3.00701	2.77545	2.67079	2.90672	Mnd1	ENSMUSG00000033752	76915	meiotic nuclear divisions 1
ENSMUSG00000026999.14	chr2	80617236	80658906	+	Nup35	-0.210629	0.022196	0.0446395	1137	1008	903	882	997	933	4.28625	4.28284	4.15928	4.01208	4.13511	3.95464	Nup35	ENSMUSG00000026999	69482	nucleoporin 35
ENSMUSG00000007570.15	chr17	28313530	28326568	+	Fance	-0.406029	0.0224808	0.0451412	655	671	617	513	651	429	3.49105	3.69609	3.6102	3.23085	3.52056	2.83465	Fance	ENSMUSG00000007570	72775	Fanconi anemia, complementation group E
ENSMUSG00000049327.17	chr5	124439930	124462308	+	Kmt5a	0.30441	0.0281637	0.0544421	14626	12246	12422	16173	14185	22359	7.97089	7.88492	7.94057	8.20797	7.96507	8.53674	Kmt5a	ENSMUSG00000049327	67956	lysine methyltransferase 5A
ENSMUSG00000001440.5	chr11	97159714	97187881	-	Kpnb1	-0.133372	0.0343511	0.0641463	24257	20809	19898	19936	20518	22775	8.70074	8.6498	8.62027	8.50975	8.49758	8.56333	Kpnb1	ENSMUSG00000001440	16211	karyopherin (importin) beta 1
ENSMUSG00000004980.16	chr6	51460932	51469894	-	Hnrnpa2b1	0.283705	0.0448545	0.0801952	10717	8754	8851	11671	9892	15883	7.52228	7.40065	7.45161	7.73733	7.44506	8.04338	Hnrnpa2b1	ENSMUSG00000004980	53379	heterogeneous nuclear ribonucleoprotein A2/B1
ENSMUSG00000052926.15	chr8	84956610	84969767	-	Rnaseh2a	-0.147933	0.0509296	0.0891442	3324	3249	2851	2914	3145	3024	5.83352	5.97084	5.81741	5.73566	5.79201	5.65062	Rnaseh2a	ENSMUSG00000052926	69724	ribonuclease H2, large subunit
ENSMUSG00000024498.15	chr18	42511510	42575551	+	Tcerg1	0.222685	0.0556297	0.0961094	8134	6816	6961	8823	7599	11196	7.12443	7.03966	7.10508	7.33376	7.06463	7.5389	Tcerg1	ENSMUSG00000024498	56070	transcription elongation regulator 1 (CA150)
ENSMUSG00000033186.8	chr14	99034544	99046136	-	Mzt1	-0.157613	0.0596422	0.102041	2192	1833	1790	1649	1799	2136	5.23296	5.14523	5.14605	4.91444	4.98632	5.14917	Mzt1	ENSMUSG00000033186	76789	mitotic spindle organizing protein 1
ENSMUSG00000026134.11	chr1	33453810	33669795	-	Prim2	-0.156614	0.0899255	0.143166	1642	1471	1400	1239	1414	1699	4.81627	4.82791	4.79163	4.50217	4.63902	4.81903	Prim2	ENSMUSG00000026134	19076	DNA primase, p58 subunit
ENSMUSG00000026020.9	chr1	59684971	59719044	+	Nop58	-0.111622	0.102004	0.158833	10585	9099	9008	8642	9091	10717	7.5044	7.45641	7.47697	7.30386	7.32324	7.47582	Nop58	ENSMUSG00000026020	55989	NOP58 ribonucleoprotein
ENSMUSG00000055660.8	chr17	94727080	94749892	-	Mettl4	0.130982	0.123359	0.186388	1702	1332	1438	1583	1670	1982	4.86804	4.68476	4.83025	4.85553	4.87901	5.04124	Mettl4	ENSMUSG00000055660	76781	methyltransferase like 4
ENSMUSG00000032477.13	chr9	109875579	109893895	+	Cdc25a	0.107658	0.179947	0.254063	2136	1898	1812	2175	2421	2141	5.19563	5.19549	5.16367	5.31376	5.41463	5.15254	Cdc25a	ENSMUSG00000032477	12530	cell division cycle 25A
ENSMUSG00000021485.13	chr13	55325168	55329758	-	Mxd3	0.142509	0.180616	0.254914	3184	2850	2826	3434	2919	4206	5.77145	5.78184	5.8047	5.97251	5.68445	6.12654	Mxd3	ENSMUSG00000021485	17121	Max dimerization protein 3
ENSMUSG00000027845.15	chr3	103800605	103809444	-	Dclre1b	-0.0858359	0.198036	0.275494	2617	2330	2204	2336	2238	2632	5.48857	5.49127	5.44614	5.41676	5.30126	5.45035	Dclre1b	ENSMUSG00000027845	140917	DNA cross-link repair 1B
ENSMUSG00000021470.17	chr13	63815240	63900302	+	Ercc6l2	0.0834107	0.259217	0.344119	1760	1379	1376	1573	1722	1801	4.91637	4.73477	4.76669	4.84639	4.92323	4.90312	Ercc6l2	ENSMUSG00000021470	76251	excision repair cross-complementing rodent repair deficiency, complementation group 6 like 2
ENSMUSG00000015749.12	chr3	95929246	95947390	+	Anp32e	-0.070873	0.263349	0.348819	4005	3572	3567	3758	3837	3740	6.10236	6.10756	6.1406	6.10257	6.07889	5.95715	Anp32e	ENSMUSG00000015749	66471	acidic (leucine-rich) nuclear phosphoprotein 32 family, member E
ENSMUSG00000053128.14	chr9	44066327	44113517	-	Rnf26	-0.112259	0.282415	0.368951	1144	1029	991	1128	1072	941	4.2951	4.31257	4.29337	4.36682	4.2397	3.96695	Rnf26	ENSMUSG00000053128	213211	ring finger protein 26
ENSMUSG00000004018.9	chr11	26386135	26471876	+	Fancl	-0.0970771	0.309661	0.397456	543	516	549	483	549	575	3.22073	3.31747	3.44188	3.144	3.27492	3.25681	Fancl	ENSMUSG00000004018	67030	Fanconi anemia, complementation group L
ENSMUSG00000026094.14	chr1	53755506	53785224	-	Stk17b	-0.107509	0.339475	0.427986	4763	3806	4046	3741	3628	5284	6.3524	6.19909	6.32236	6.09603	5.9981	6.45569	Stk17b	ENSMUSG00000026094	98267	serine/threonine kinase 17b (apoptosis-inducing)
ENSMUSG00000029591.14	chr5	114130386	114139323	+	Ung	-0.086556	0.418263	0.506334	408	365	360	362	340	443	2.80879	2.81857	2.83376	2.72846	2.58445	2.88093	Ung	ENSMUSG00000029591	22256	uracil DNA glycosylase
ENSMUSG00000048668.15	chr6	128357000	128362911	-	Rhno1	-0.0771715	0.443374	0.531778	2386	2297	2074	2233	1941	2727	5.35528	5.47069	5.35845	5.35172	5.0959	5.5015	Rhno1	ENSMUSG00000048668	72440	RAD9-HUS1-RAD1 interacting nuclear orphan 1
ENSMUSG00000038000.10	chr8	105695860	105701102	-	Acd	0.09232	0.522762	0.606271	2491	2119	2239	2591	1999	3375	5.4174	5.35435	5.46886	5.5662	5.13836	5.80902	Acd	ENSMUSG00000038000	497652	adrenocortical dysplasia
ENSMUSG00000066979.6	chr7	131560222	131571895	+	Bub3	-0.0218291	0.707202	0.768772	9502	8665	8331	9006	8767	10162	7.34869	7.38591	7.36426	7.36338	7.27089	7.3991	Bub3	ENSMUSG00000066979	12237	BUB3 mitotic checkpoint protein
ENSMUSG00000027778.15	chr3	68892499	69004570	-	Ift80	0.0140187	0.840647	0.876452	1151	1001	1043	1079	1189	1180	4.3039	4.27279	4.36712	4.30277	4.38908	4.29332	Ift80	ENSMUSG00000027778	68259	intraflagellar transport 80
