# Supplementary material for: The transcription factors TFE3 and TFEB amplify p53 dependent transcriptional programs in response to DNA damage
Source: eLife journal article supplement (doi:10.7554/elife.40856), 2018-12-06
Supplement: supp [file elife-40856-supp-v1.zip › elife_poa_e40856_Supplementary_File_4.xlsx]

## Sheet: Sheet1
Mouse Primers	Sequence	Supplementary Table 4
Rad9A F	GGCTGTCCATTCGCTATCCC
Rad9B R	GGACGAGTTCACAGTCCGTA
Chek2 F	GATCATTAGCAAGCGGAGGTT
Chek2 R	CACCACCCGGTCAAATAGTTC
Bbc3 F	AGCAGCACTTAGAGTCGCC
Bbc3 R	CCTGGGTAAGGGGAGGAGT
Bax F	TGAAGACAGGGGCCTTTTTG
Bax R	AATTCGCCGGAGACACTCG
Trp53inp1 F	AAGTGGTCCCAGAATGGAAGC
Trp53inp1 R	GGCGAAAACTCTTGGGTTGT
Dram1 F	TCATCTCCTACGTGGTCGC
Dram1 R	CTGCGCCAAGAAATGCAGAG
Dram1 (2) F	CATCTCCGCTGTTTCGTGC
Dram1 (2) R	GGATTCCATTCCAGCTTGGTTA
Mdm2 F	TGTCTGTGTCTACCGAGGGTG
Mdm2 R	TCCAACGGACTTTAACAACTTCA
Sesn1 F	GGCCAGGACGAGGAACTTG
Sesn1 R	AAGGAGTCTGCAAATAACGCAT
Sesn2 F	TCCGAGTGCCATTCCGAGAT
Sesn2 R	TCCGGGTGTAGACCCATCAC
Trp53 F	CACAGCACATGACGGAGGTC
Trp53 R	TCCTTCCACCCGGATAAGATG
Wrap53 F	GTCGGAGGAGCGACTCTTAG
Wrap53 R	GCTGGGGTTGGTCATCACC
Cdkn1a F	CCTGGTGATGTCCGACCTG
Cdkn1a R	CCATGAGCGCATCGCAATC
Laptm5 F	TGAGTGTCCTGCTGTTCATTG
Laptm5 R	CTGAGGTACGGCATCTTGAAG
Egfr F	GCCATCTGGGCCAAAGATACC
Egfr R	GTCTTCGCATGAATAGGCCAAT
Ctsd F	GCTTCCGGTCTTTGACAACCT
Ctsd R	CACCAAGCATTAGTTCTCCTCC
Foxo3 F	CTGGGGGAACCTGTCCTATG
Foxo3 R	TCATTCTGAACGCGCATGAAG
Lincpint F	GGAGGGTCCTTGCCTCACT
Lincpint R	TGATCTGTGGTCATGTACTCCTG
Actb F	GGCTGTATTCCCCTCCATCG
Actb R	CCAGTTGGTAACAATGCCATGT
Human Primers	Sequence
TP53 F	ATGGAGGAGCCGCAGTCAGAT
TP53 R	GCAGCGCCTCACAACCTCCGTC
MDM2 F	GAATCATCGGACTCAGGTACATC
MDM2 R	TCTGTCTCACTAATTGCTCTCCT
UBE2B F	TCTCTGCTGGATGAACCGAAT
UBE2B R	ACAATGGCCGAAACTCTTTTCTC
UBE4B F	CTACCTCCCCAATAGGTGCAT
UBE4B R	GGCGAGCTGCTGAGAGAAC
UVRAG F	ATGCCAGACCGTCTTGATACA
UBRAG R	TGACCCAAGTATTTCAGCCCA
SESN1 F	CTACATTGGAATAATGGCTGCGG
SESN1 R	AGGTCTATGGGCTAACACTTTGT
SESN2 F	AAGGACTACCTGCGGTTCG
SESN2 R	CGCCCAGAGGACATCAGTG
RAD9A F	CATTGACTCTTACATGATCGCCA
RAD9A R	GCCAGGTGAAAGGGAAATGG
TRP53INP1 F	TCTTGAGTGCTTGGCTGATACA
TRP53INP1 R	GGTGGGGTGATAAACCAGCTC
DRAM1 F	AGTGCTTGGATTGGTGGGATG
DRAM1 R	GATGGACTGTAGGAGCGTGTA
BBC3 F	GACCTCAACGCACAGTACGAG
BBC3 R	AGGAGTCCCATGATGAGATTGT
BAX F	CCCGAGAGGTCTTTTTCCGAG
BAX R	CCAGCCCATGATGGTTCTGAT
RPS18 F	ATCACCATTATGCAGAATCCACG
RPS18 R	GACCTGGCTGTATTTTCCATCC
ACTB F	TCCCTGGAGAAGAGCTACGA
ACTB R	AGCACTGTGTTGGCGTACAG
