# Supplementary figures and images for: The transcription factors TFE3 and TFEB amplify p53 dependent transcriptional programs in response to DNA damage
Source: eLife journal article supplement (doi:10.7554/elife.40856), 2018-12-06

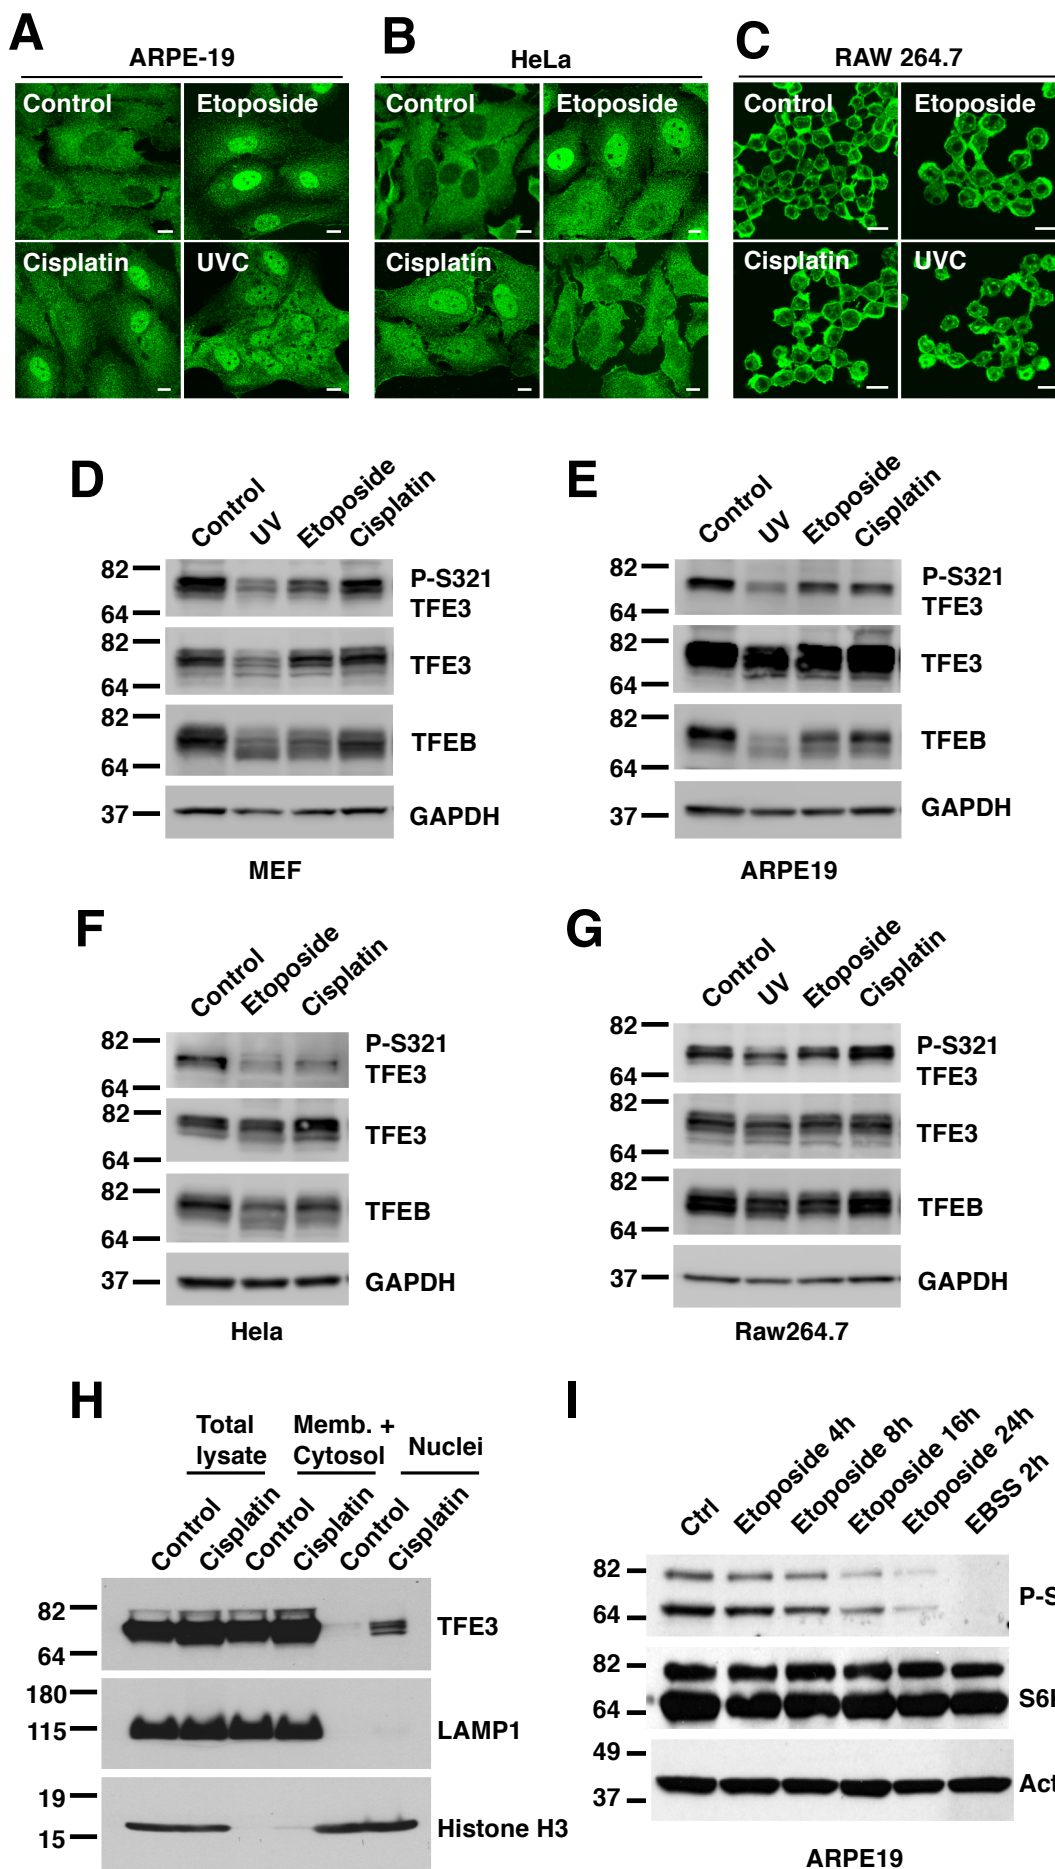

**Figure 1-figure supplement 1**

Supplement: supp [file elife-40856-supp-v1.zip › elife_poa_e40856_Figure_1_figure_supplement_1.pdf]

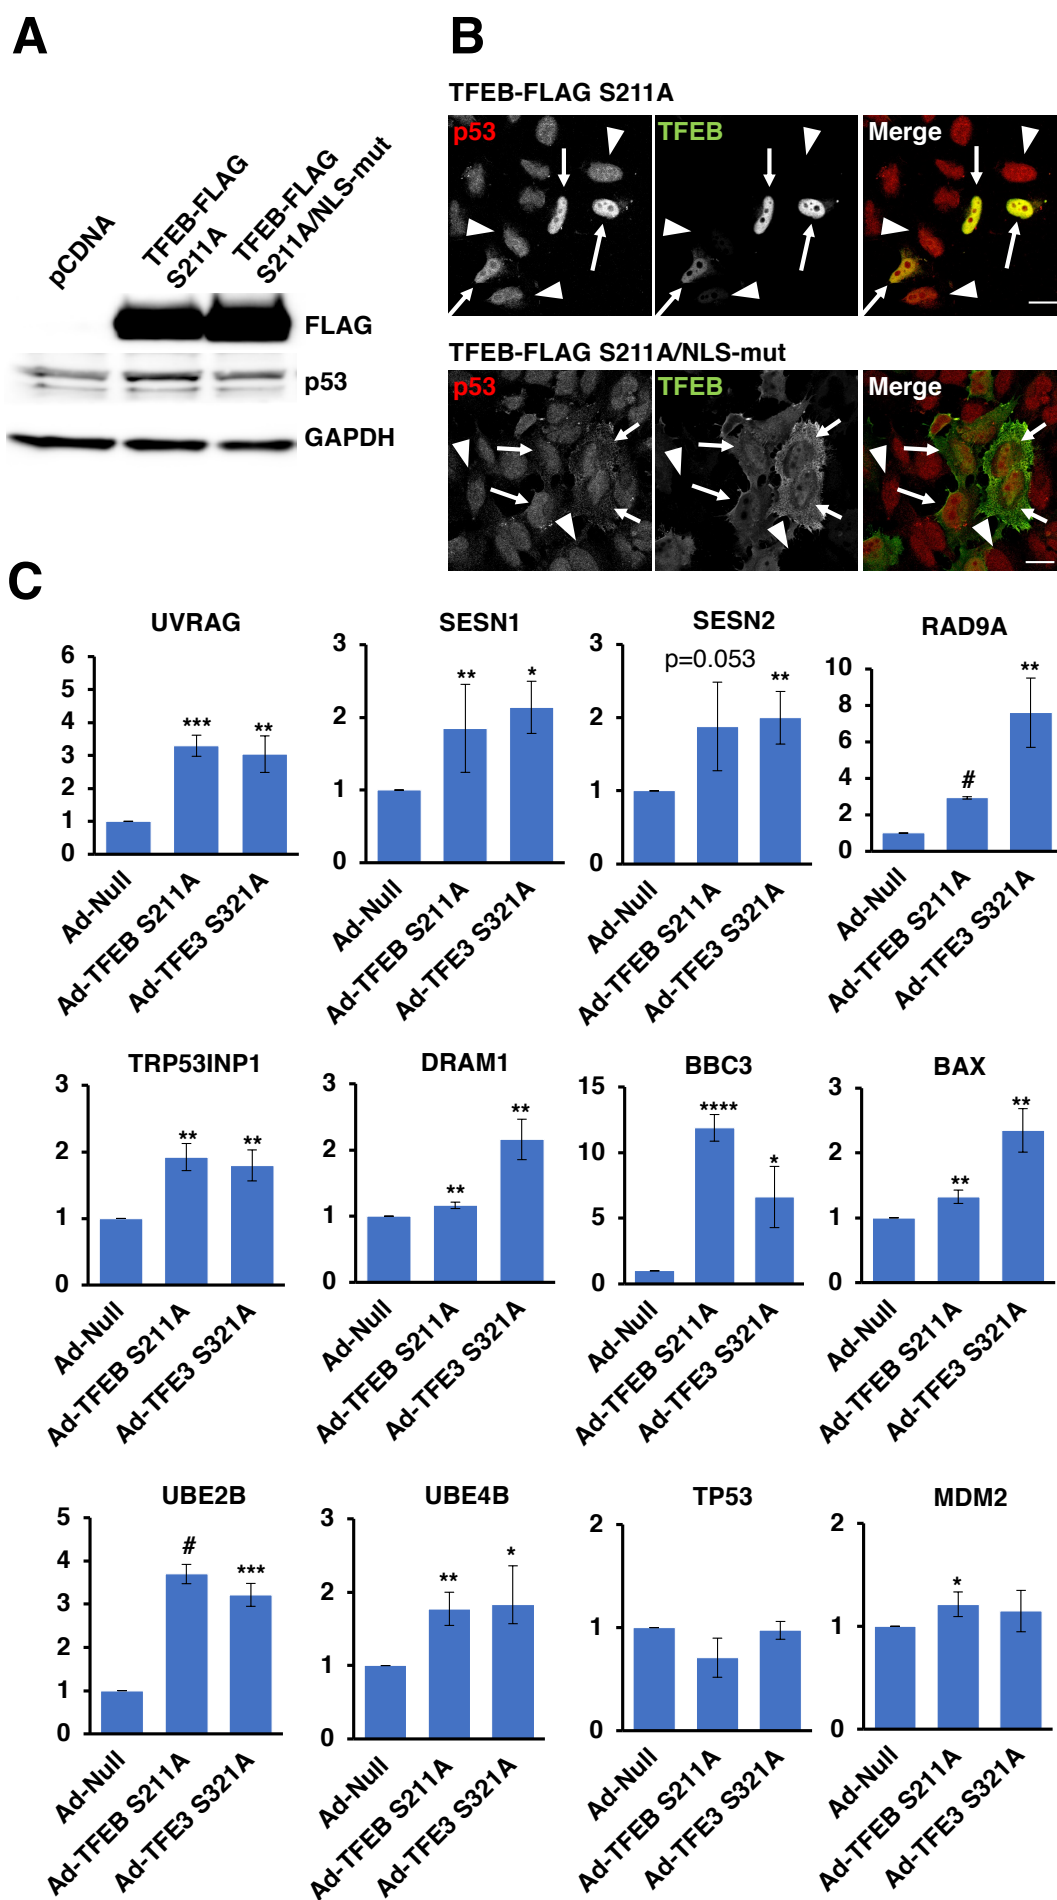

Figure 5-figure supplement 1

Supplement: supp [file elife-40856-supp-v1.zip › elife_poa_e40856_Figure_5_figure_supplement_1.pdf]

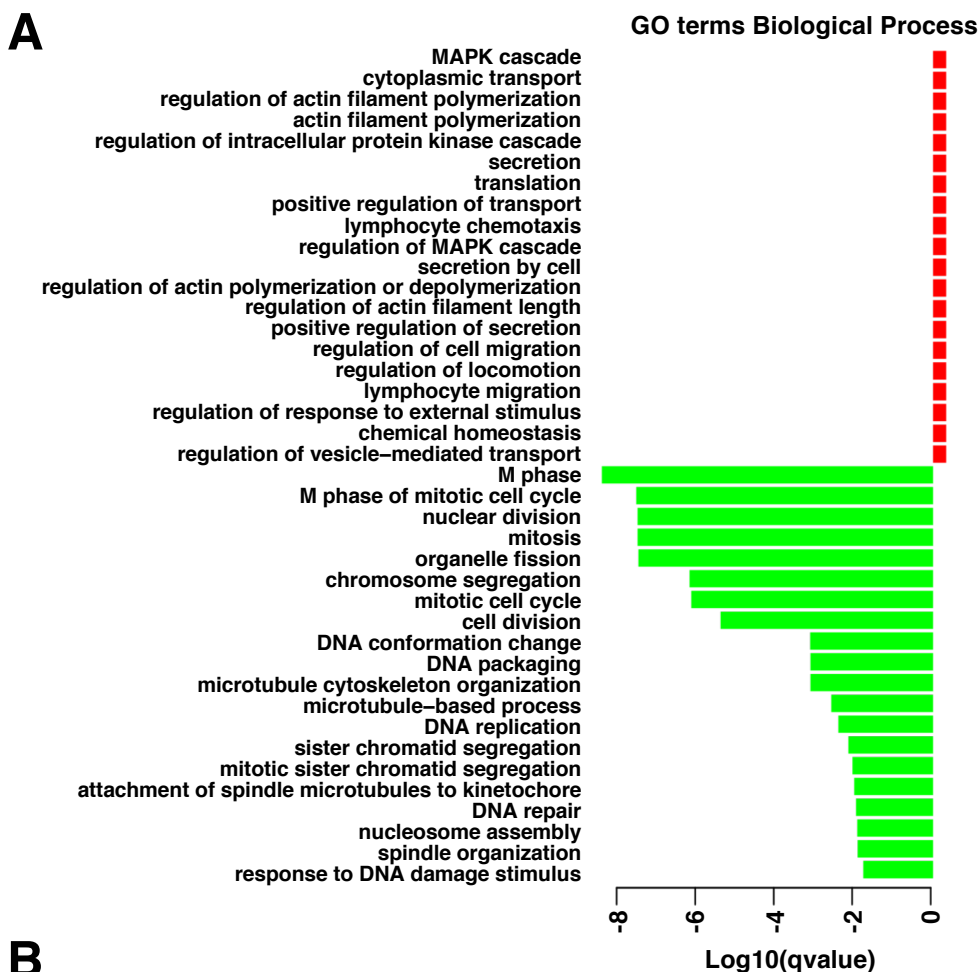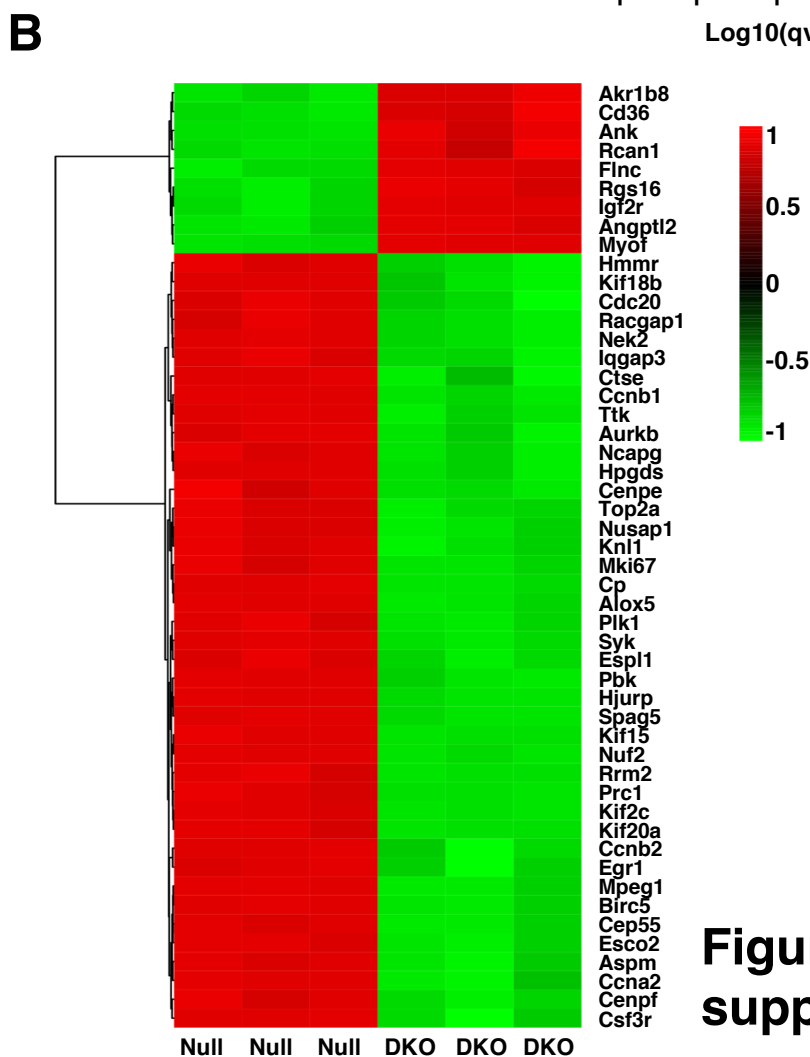

**Figure 8-figure  
supplement 1**

Supplement: supp [file elife-40856-supp-v1.zip › elife_poa_e40856_Figure_8_figure_supplement_1.pdf]

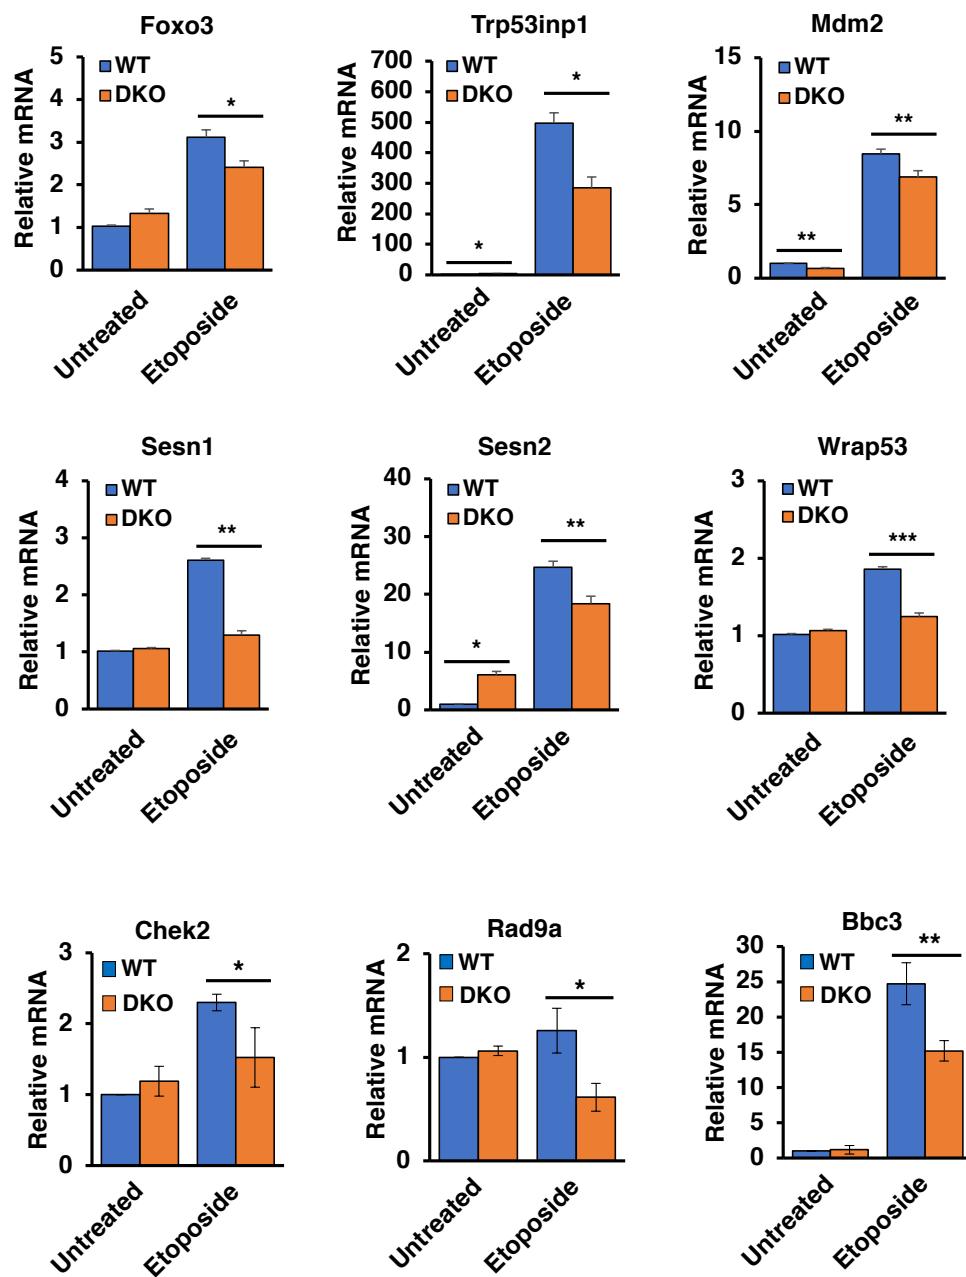

**Figure 3-figure supplement 1**

Supplement: supp [file elife-40856-supp-v1.zip › elife_poa_e40856_Figure_3_figure_supplement_1.pdf]

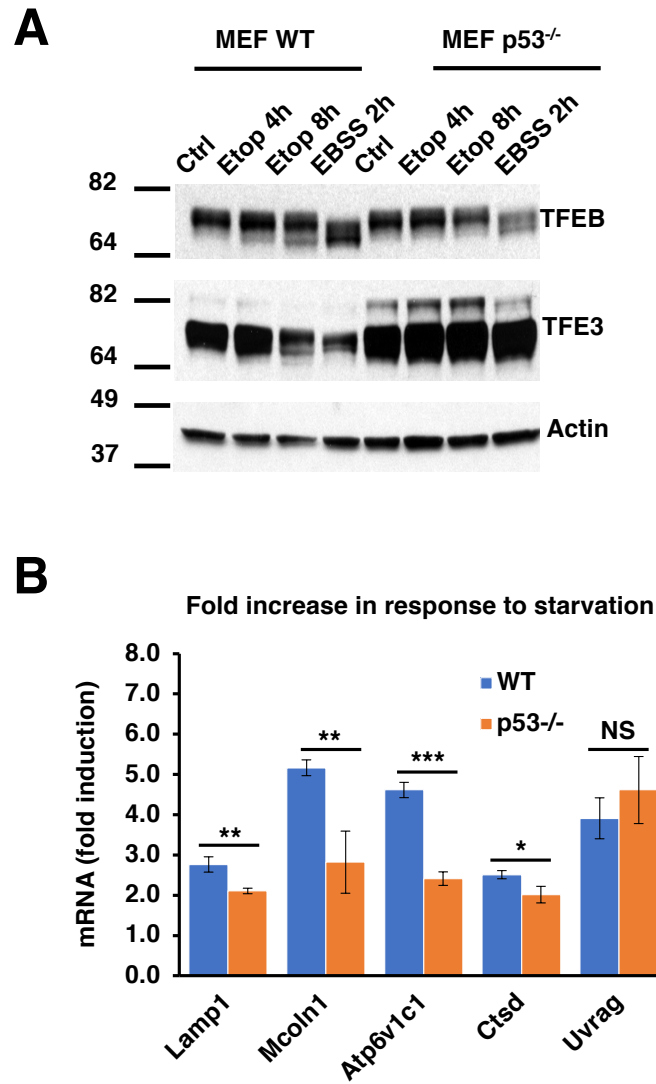

**Figure 2-figure supplement 1**

Supplement: supp [file elife-40856-supp-v1.zip › elife_poa_e40856_Figure_2_figure_supplement_1.pdf]
